# Supplementary material for: Disposition of Proteins and Lipids in Synaptic Membrane Compartments Is Altered in Q175/Q7 Huntington’s Disease Mouse Striatum
Source: Front Synaptic Neurosci. 2021 Mar 18;13:618391. doi: 10.3389/fnsyn.2021.618391 (PMC8013775; doi:10.3389/fnsyn.2021.618391)
Supplement: Supplementary file 2 [file Data_Sheet_2.xls]

## Sheet: mergeResult (1)
BIDMC SAMPLE NUMBER	Animal Number/ Fraction	Genotype
#[c-1]:041019PcsWT31.raw	5608 F1	Q7/Q7
#[c-10]:040919PcsWT52.raw	6327 F2	Q7/Q7
#[c-11]:040919PcsWT51.raw	6327 F1	Q7/Q7
#[c-12]:040919PcsWT42.raw	5609 F2	Q7/Q7
#[c-13]:040919PcsWT41.raw	5609 F1	Q7/Q7
#[c-14]:040919PcsWT32.raw	5608 F2	Q7/Q7
#[c-15]:040919PcsWT112.raw	6326 F2	Q7/Q7
#[c-16]:040919PcsWT111.raw	6326 F1	Q7/Q7
#[c-17]:040919PcsWT102.raw	0003 F2	Q7/Q7
#[c-18]:040919PcsWT101.raw	0003 F1	Q7/Q7
#[c-19]:040919PcsKi92.raw	6377 F2	Q175/Q7
#[c-2]:040919PcsWT92.raw	0007 F2	Q7/Q7
#[c-20]:040919PcsKi91.raw	6377 F1	Q175/Q7
#[c-21]:040919PcsKi82.raw	9006 F2	Q175/Q7
#[c-22]:040919PcsKi81.raw	9006 F1	Q175/Q7
#[c-23]:040919PcsKi72.raw	6332 F2	Q175/Q7
#[c-24]:040919PcsKi71.raw	6332 F1	Q175/Q7
#[c-25]:040919PcsKi62.raw	6363 F2	Q175/Q7
#[c-26]:040919PcsKi61.raw	6363 F1	Q175/Q7
#[c-27]:040919PcsKi52.raw	6386 F2	Q175/Q7
#[c-28]:040919PcsKi51.raw	6386 F1	Q175/Q7
#[c-29]:040919PcsKi42.raw	6546 F2	Q175/Q7
#[c-3]:040919PcsWT91.raw	0007 F1	Q7/Q7
#[c-30]:040919PcsKi41.raw	6546 F1	Q175/Q7
#[c-31]:040919PcsKi32.raw	6561 F2	Q175/Q7
#[c-32]:040919PcsKi31.raw	6561 F1	Q175/Q7
#[c-33]:040919PcsKi112.raw	6390 F2	Q175/Q7
#[c-34]:040919PcsKi111.raw	6390 F1	Q175/Q7
#[c-35]:040919PcsKi102.raw	6381 F2	Q175/Q7
#[c-36]:040919PcsKi101.raw	6381 F1	Q175/Q7
#[c-4]:040919PcsWT82.raw	0002 F2	Q7/Q7
#[c-5]:040919PcsWT81.raw	0002 F1	Q7/Q7
#[c-6]:040919PcsWT72.raw	6302 F2	Q7/Q7
#[c-7]:040919PcsWT71.raw	6302 F1	Q7/Q7
#[c-8]:040919PcsWT62.raw	0006 F2	Q7/Q7
#[c-9]:040919PcsWT61.raw	0006 F1	Q7/Q7
#normalize base:
#control group:c
#toprank filter:true
#mScoreThreshold:4.0
#cScoreThreshold:2.0
Rej.	LipidIon	LipidGroup	Class	FattyAcid	FA1	FA2	FA3	FA4	CalcMz	IonFormula	Area[c-1]	Area[c-2]	Area[c-3]	Area[c-4]	Area[c-5]	Area[c-6]	Area[c-7]	Area[c-8]	Area[c-9]	Area[c-10]	Area[c-11]	Area[c-12]	Area[c-13]	Area[c-14]	Area[c-15]	Area[c-16]	Area[c-17]	Area[c-18]	Area[c-19]	Area[c-20]	Area[c-21]	Area[c-22]	Area[c-23]	Area[c-24]	Area[c-25]	Area[c-26]	Area[c-27]	Area[c-28]	Area[c-29]	Area[c-30]	Area[c-31]	Area[c-32]	Area[c-33]	Area[c-34]	Area[c-35]	Area[c-36]	ObsMz[c-1]	ObsMz[c-2]	ObsMz[c-3]
0	AcCa(11:3)+H	AcCa(11:3)+H	AcCa	(11:3)	(11:3)				324.217	C18 H30 O4 N1	7.08077e+06	245400	7.76584e+06	3.28148e+06	4.49502e+06	820506	8.72808e+06	1.11165e+06	2.92448e+06	2.54764e+06	7.30313e+06	2.3813e+06	8.66639e+06	1.95334e+07	1.67881e+07	2.013e+06	2.85617e+06	2.63217e+06	701919	6.14863e+07	5.57381e+06	3.69317e+07	7.29371e+06	1.69296e+08	893731	6.74037e+07	1.34024e+07	2.606e+08	1.17378e+07	6.35842e+07	4.35489e+06	5.84263e+06	1.1191e+08	1.9736e+07	66022.8	2.38033e+07	324.217	324.217	324.217
1	AcCa(11:3)+H	AcCa(11:3)+H	AcCa	(11:3)	(11:3)				324.217	C18 H30 O4 N1	4.74201e+07	1.65342e+07	1.82328e+08	4.77565e+06	6.63675e+07	8.77524e+06	2.76811e+07	1.18639e+07	1.3436e+08	9.20899e+07	1.14243e+08	1.03092e+08	5.2377e+07	6.27371e+07	3.23355e+06	1.31779e+08	3.28005e+08	1.72547e+08	1.85069e+06	1.12999e+09	2.0428e+08	1.09686e+09	1.43442e+08	7.50809e+08	2.94319e+06	3.87623e+08	1.68811e+08	1.01062e+09	3.84389e+08	1.02686e+06	1.56544e+08	1.6144e+08	2.87304e+07	1.63445e+09	7.98657e+06	9.39038e+08		324.217
0	AcCa(11:3)+H	AcCa(11:3)+H	AcCa	(11:3)	(11:3)				324.217	C18 H30 O4 N1	3.71229e+07	7.11933e+06	4.69908e+07	1.26814e+07	2.99756e+07	2.96729e+06	1.52956e+07	7.3171e+06	6.58751e+07	1.99117e+08	1.7736e+06	1.06439e+06	1.72101e+06	3.61569e+06	6.11999e+06	6.97309e+06	5.12072e+08	4.60977e+07	1.10872e+07	2.10754e+09	1.12072e+08	1.92955e+09	8.11613e+07	1.53434e+09	1.11161e+09	8.38237e+08	1.38339e+09	2.10685e+08	9.9965e+08	5.23894e+06	8.83981e+08	1.96794e+07	1.4695e+09	3.48697e+07	5.54109e+07	8.89898e+08		324.217
0	AcCa(11:3)+H	AcCa(11:3)+H	AcCa	(11:3)	(11:3)				324.217	C18 H30 O4 N1	2.10398e+08	1.5991e+07	3.68169e+08	3.2897e+06	1.14815e+08	5.84443e+07	1.95739e+08	1.42707e+07	7.61387e+07	2.35122e+07	1.04733e+08	5.40129e+08	1.76166e+08	5.16194e+07	7.72447e+06	1.383e+08	6.48186e+07	7.76479e+07	1.25206e+07	2.10754e+09	3.77e+06	2.18454e+09	6.45455e+06	6.69395e+07	1.11161e+09	8.38237e+08	5.6312e+06	1.46732e+08	9.9965e+08	8.36711e+08	1.29639e+07	4.79285e+08	1.4695e+09	1.58399e+09	8.47156e+06	8.27072e+08	324.217	324.217	324.217
0	AcCa(12:3)+H	AcCa(12:3)+H	AcCa	(12:3)	(12:3)				338.233	C19 H32 O4 N1	3.1336e+07	1.54637e+07	1.67736e+07	4.2847e+07	2.24143e+07	7.19551e+06	2.68114e+07	4.60523e+07	1.87494e+07	1.30457e+07	2.52385e+07	1.47457e+07	2.16733e+07	6.01733e+06	2.19539e+07	1.33664e+07	4.46922e+07	2.00641e+07	322233	461667	728526	741393	2.6224e+06	612001	5.58108e+06	389550	7.49462e+06	5.88608e+06	3.90619e+07	6.89824e+06	2.17956e+07	6.35616e+06	3.29549e+07	4.45979e+06	1.48505e+07	1.15092e+06	338.233	338.233	338.233
0	AcCa(12:3)+H	AcCa(12:3)+H	AcCa	(12:3)	(12:3)				338.233	C19 H32 O4 N1	1.31318e+06	752.606	198567	19420.9	31792.9	52400.8	3.01536e+06	200460	1.35696e+06	40929.3	6892.56	108091	374559	126261	246954	530466	111922	2.73659e+06	3.93591e+06	7.033e+06	1.82159e+07	0	374322	2.4348e+06	453062	2.89901e+06	6.84754e+06	1.3086e+06	5.0578e+06	0	1.65349e+07	1.42211e+06	1.65325e+06	495285	416081	207106	338.233	338.233	338.233
0	AcCa(12:3)+H	AcCa(12:3)+H	AcCa	(12:3)	(12:3)				338.233	C19 H32 O4 N1	2.16422e+07	2.57284e+07	2.59237e+08	1.75255e+07	1.21188e+08	2.46618e+07	2.64808e+08	2.039e+07	3.93913e+06	6.58686e+07	1.1175e+08	1.89547e+07	1.05045e+08	2.95751e+07	2.5375e+07	1.08353e+08	3.61956e+07	4.66191e+08	3.52627e+06	1.51226e+08	866927	2.67694e+07	1.20498e+06	8.3908e+06	839522	1.51712e+08	3.58816e+06	5.72985e+07	487199	3.69343e+07	1.90663e+06	5.86233e+08	1.55467e+06	1.31841e+08	1.28382e+06	6.45858e+07		338.232	338.233
0	AcCa(12:3)+H	AcCa(12:3)+H	AcCa	(12:3)	(12:3)				338.233	C19 H32 O4 N1	4.14472e+07	7.47531e+07	3.65015e+08	1.28064e+08	2.26099e+08	1.68727e+07	3.70563e+08	4.12253e+07	1.00125e+08	7.35426e+07	9.31476e+07	912460	4.18033e+08	2.065e+07	4.01193e+07	1.01371e+08	2.38146e+07	3.13261e+08	4.83714e+06	2.05497e+07	2.10929e+06	4.85015e+07	2.58807e+06	2.39496e+07	1.40255e+07	4.89969e+07	5.58385e+06	1.75142e+08	9.01766e+06	1.33185e+08	2.64833e+06	7.86914e+06	1.52183e+06	2.55325e+07	2.49836e+06	7.40545e+07			338.232
0	AcCa(12:3)+H	AcCa(12:3)+H	AcCa	(12:3)	(12:3)				338.233	C19 H32 O4 N1	9.46225e+07	4.67474e+07	2.71962e+08	1.28064e+08	1.66012e+08	9.94207e+07	6.59063e+08	9.78836e+07	2.22758e+08	1.29661e+08	2.18459e+08	4.93867e+07	7.47121e+08	6.05775e+07	9.13108e+07	2.12723e+08	1.27298e+08	3.13261e+08	2.81995e+06	5.86151e+07	1.24227e+07	1.32314e+08	1.28079e+06	4.09989e+07	1.40255e+07	7.431e+08	2.04464e+07	2.02855e+08	7.99208e+06	5.26511e+08	2.37584e+07	2.6549e+07	6.88414e+06	3.46529e+07	1.78862e+07	1.74081e+08		338.233
0	AcCa(12:3)+H	AcCa(12:3)+H	AcCa	(12:3)	(12:3)				338.233	C19 H32 O4 N1	1.13312e+07	8.25059e+06	1.15359e+08	2.13799e+06	9.62761e+07	4.06944e+06	3.55577e+07	2.23058e+07	5.43549e+06	9.53435e+06	1.22907e+08	1.42773e+07	1.40887e+07	9.05024e+06	2.09333e+07	1.01843e+07	2.60083e+06	1.53979e+07	3.92383e+06	6.90222e+06	33589.1	8.68277e+07	8.24695e+06	6.1178e+07	74174.2	6.06454e+06	1.64107e+06	1.61588e+07	4.91698e+06	2.70147e+07	6.95433e+06	4.80769e+06	726513	1.19371e+07	1.25121e+06	2.34151e+06	338.233	338.233	338.233
0	AcCa(12:3)+H	AcCa(12:3)+H	AcCa	(12:3)	(12:3)				338.233	C19 H32 O4 N1	1.06227e+08	6.62573e+07	4.08596e+08	1.5568e+07	3.10414e+08	4.07073e+06	4.86794e+08	3.71325e+07	7.99829e+07	4.39566e+07	5.01396e+08	6.41748e+06	1.28335e+08	2.49063e+07	9.58971e+06	2.7613e+08	2.16871e+07	2.29537e+08	3.68974e+06	9.82991e+06	376273	4.71489e+06	5.75161e+06	1.50633e+08	291067	7.25997e+07	1.36646e+07	8.54535e+06	3.11423e+07	3.55361e+08	4.1195e+07	1.04312e+08	9.6321e+06	4.79818e+07	8.12801e+06	5.22558e+06		338.233	338.233
0	AcCa(12:3)+H	AcCa(12:3)+H	AcCa	(12:3)	(12:3)				338.233	C19 H32 O4 N1	9.43056e+08	3.58277e+08	1.97439e+09	2.27759e+08	1.59508e+08	1.05332e+07	1.87926e+08	2.57039e+08	8.80736e+08	1.70142e+07	3.86531e+08	9.08191e+07	1.00808e+08	1.16938e+08	5.96219e+07	3.6957e+08	4.45679e+08	1.77481e+09	6.14891e+07	1.90381e+08	2.51033e+07	4.88308e+08	1.49814e+07	5.21686e+08	2.87827e+07	3.82881e+07	3.09551e+07	1.40275e+08	3.48496e+08	1.21704e+08	2.73271e+08	4.40366e+08	5.62697e+07	1.49149e+08	4.74135e+07	5.74859e+08	338.233		338.233
0	AcCa(12:3)+H	AcCa(12:3)+H	AcCa	(12:3)	(12:3)				338.233	C19 H32 O4 N1	3.20376e+07	2.89483e+07	2.841e+07	1.07044e+07	1.16624e+07	6.134e+07	4.85001e+07	1.94532e+07	1.24237e+08	6.53621e+07	1.45474e+08	4.72111e+07	9.51117e+07	5.44196e+07	6.8536e+06	3.80467e+07	2.26926e+07	8.7332e+07	4.51522e+06	9.81064e+06	980595	7.45488e+07	2.04707e+07	2.78624e+07	1.61494e+06	3.56612e+08	2.12941e+07	5.29991e+07	5.59896e+07	9.78226e+07	6.69821e+07	3.0258e+07	1.823e+07	3.4067e+07	9.90834e+07	1.74542e+08	338.232	338.233	338.233
0	AcCa(12:3)+H	AcCa(12:3)+H	AcCa	(12:3)	(12:3)				338.233	C19 H32 O4 N1	2.70683e+07	2.37447e+07	7.758e+06	7.49386e+07	1.23361e+07	7.45976e+06	1.63045e+08	5.22529e+06	1.2327e+07	4.53371e+07	2.4785e+07	1.24252e+07	8.10951e+07	2.75338e+07	2.10225e+07	3.96936e+07	9.85655e+06	6.2186e+06	3.7314e+06	6.92848e+07	1.55961e+06	3.90426e+08	6.9396e+06	3.55071e+08	4.33499e+06	1.14737e+08	3.32259e+06	1.18924e+08	1.36011e+07	1.47565e+08	2.27138e+07	2.71286e+07	2.68951e+06	2.22211e+07	1.18713e+07	2.6122e+06	338.233	338.233	338.233
0	AcCa(12:3)+H	AcCa(12:3)+H	AcCa	(12:3)	(12:3)				338.233	C19 H32 O4 N1	4.84416e+07	1.54516e+07	1.18989e+07	2.20759e+07	5.46968e+06	7.06008e+06	4.54616e+07	1.11569e+07	1.68906e+08	1.53389e+07	4.05471e+07	1.01486e+07	9.1813e+06	1.51352e+07	2.39224e+07	5.63378e+06	2.14028e+07	1.34105e+08	5.82119e+06	1.29386e+08	137518	6.63199e+07	2.761e+07	3.30208e+07	324313	4.21496e+06	2.76608e+07	9.39162e+06	3.35736e+07	8.65553e+06	4.47598e+07	1.14042e+07	1.71451e+07	1.00502e+08	2.06241e+07	1.52844e+07	338.233	338.233	338.233
0	AcCa(12:3)+H	AcCa(12:3)+H	AcCa	(12:3)	(12:3)				338.233	C19 H32 O4 N1	5.83556e+06	1.60997e+07	1.31786e+08	3.78724e+06	1.70143e+08	2.69397e+07	1.42643e+08	5.27485e+06	1.70969e+08	1.35646e+08	6.78978e+07	9.09259e+07	1.26295e+08	6.24441e+07	7.23332e+06	1.9931e+08	7.0202e+06	1.70321e+08	2.51015e+07	6.54406e+07	1.24164e+06	2.36969e+08	1.02345e+07	5.63793e+07	3.72268e+06	1.15391e+07	3.13583e+06	2.23171e+07	1.40836e+07	3.18526e+06	1.60405e+07	7.71607e+07	1.46936e+07	6.62509e+07	1.9291e+07	6.44576e+06	338.233	338.233
0	AcCa(16:0)+H	AcCa(16:0)+H	AcCa	(16:0)	(16:0)				400.342	C23 H46 O4 N1	1.89405e+06	15234.8	2.13441e+07	10453	2.22199e+07	3665.29	2.29729e+07	8802.15	995697	6651.28	2.3896e+07	6721.05	327185	35590.1	12401.9	163552	11754.5	3.03996e+07	8694.45	599077	125953	933104	105790	1.87078e+06	147918	241775	90420.5	0	6116.93	0	8431.3	132328	192411	171468	100556	357389	400.342	400.342	400.342
0	AcCa(16:0)+H	AcCa(16:0)+H	AcCa	(16:0)	(16:0)				400.342	C23 H46 O4 N1	648515	2100.56	240588	4086.08	999591	0	167749	89000.3	128220	37582.3	88589.9	42608.2	489963	24283	9719.89	1.18082e+06	6093.84	179460	9110.98	178783	16256.3	392817	10855.8	0	4597.7	0	28184.5	0	11328.3	4.75766e+07	2926.61	290476	13483.2	3.2211e+06	0	692684	400.342	400.342	400.342
0	AcCa(16:0)+H	AcCa(16:0)+H	AcCa	(16:0)	(16:0)				400.342	C23 H46 O4 N1	273288	17233.4	346911	18568.4	7885.37	10418.2	113454	7387.09	313098	7265.08	225224	9274.48	198276	12143.2	12081.3	192805	66756.1	115179	8010.97	312437	11008.5	0	1543.94	313954	5121.24	2.15443e+07	0	125313	51721.1	335148	7248.36	155791	19517.8	0	13875	162540	400.342	400.342	400.342
0	AcCa(16:0)+H	AcCa(16:0)+H	AcCa	(16:0)	(16:0)				400.342	C23 H46 O4 N1	535297	55279.2	951416	3770.34	455607	7631.86	239562	5217.28	384878	13386.6	131441	0	284713	0	48671.6	576560	9511.18	924730	4272.05	983400	4740.88	2.83507e+07	15620	4.2903e+07	20799.9	648377	13024.6	110437	195957	399444	13770.8	1.09281e+06	3568.94	1.13159e+06	3851.63	518991	400.342	400.342	400.342
0	AcCa(16:0)+H	AcCa(16:0)+H	AcCa	(16:0)	(16:0)				400.342	C23 H46 O4 N1	3651.17	0	189971	0	98562.1	0	366853	0	4048.09	0	114149	0	224092	1403.44	270.01	248425	0	225669	749.257	905895	5129.63	118539	8479.59	510910	3145.49	114167	0	0	0	0	22.462	187089	292.475	9.87984e+06	2295.75	85536.8	400.342		400.342
0	AcCa(18:0)+H	AcCa(18:0)+H	AcCa	(18:0)	(18:0)				428.373	C25 H50 O4 N1	217124	0	6.94571e+06	0	5.75095e+06	0	6.33726e+06	0	702714	0	5.86662e+06	0	1.68105e+06	22938.5	0	173506	0	8.81249e+06	0	0	0	404502	0	76555	0	135806	0	92870.2	0	459972	0	93643.1	0	0	0	0	428.373		428.373
0	AcCa(18:0)+H	AcCa(18:0)+H	AcCa	(18:0)	(18:0)				428.373	C25 H50 O4 N1	147973	0	736471	0	102860	0	111880	0	253318	0	96220	0	0	0	0	2219.17	0	214023	0	0	0	0	0	0	0	996.596	0	3.08135e+06	0	1.16903e+07	0	233379	0	0	0	0	428.373		428.373
0	AcCa(18:0)+H	AcCa(18:0)+H	AcCa	(18:0)	(18:0)				428.373	C25 H50 O4 N1	2662.31	0	2799.01	0	127806	0	148038	8269.69	437501	0	100222	0	0	38902.9	0	0	0	147996	0	424469	0	1.29458e+07	0	200616	0	7.87483e+06	0	1.3483e+06	0	0	0	0	0	73539.9	0	106181	428.373		428.373
0	AcCa(18:0)+H	AcCa(18:0)+H	AcCa	(18:0)	(18:0)				428.373	C25 H50 O4 N1	146421	0	5355.21	0	0	0	3041.74	0	0	0	2072.98	0	79871.4	17421.6	0	0	1310.29	0	0	376179	0	7.39173e+06	0	1.10488e+07	0	248584	0	0	0	5671.93	0	0	0	302475	0	120268	428.373		428.373
0	AcCa(18:1)+H	AcCa(18:1)+H	AcCa	(18:1)	(18:1)				426.358	C25 H48 O4 N1	434570	0	1.31279e+07	0	1.21793e+07	0	1.44349e+07	0	473800	0	1.57548e+07	0	627044	0	0	1.20044e+06	0	1.72422e+07	0	553088	498455	314866	0	935610	0	7.60801e+06	0	3.22235e+08	0	1.70522e+07	0	1.76186e+06	48965.3	1.28068e+06	33133.3	241841	426.358		426.358
0	AcCa(18:1)+H	AcCa(18:1)+H	AcCa	(18:1)	(18:1)				426.358	C25 H48 O4 N1	64524.1	0	183084	0	107431	0	86536	0	64404.9	0	98623.8	0	306025	61648.9	0	142698	0	771223	0	0	0	0	0	0	0	2.41746e+08	0	337141	0	2.70133e+07	0	396427	0	636459	0	2.67752e+06	426.358		426.358
0	AcCa(18:1)+H	AcCa(18:1)+H	AcCa	(18:1)	(18:1)				426.358	C25 H48 O4 N1	0	30339.6	99391.3	40694	0	0	0	0	0	0	0	4.52886e+06	95797.9	6.73582e+06	0	2374.97	41026	3459.94	0	819255	0	1.71034e+07	0	2.32739e+07	0	165626	0	126823	107075	0	0	9581.54	0	259489	0	1.04611e+06		426.358	426.358
0	AcCa(20:3)+H	AcCa(20:3)+H	AcCa	(20:3)	(20:3)				450.358	C27 H48 O4 N1	2.23751e+06	1.28141e+07	891125	971175	958024	6.57229e+06	2.36777e+06	2.58866e+06	1.42861e+06	3.04295e+06	212247	2.32644e+06	4.87042e+06	407271	4.18201e+06	1.0177e+06	7.04364e+06	1.72675e+06	3.6857e+06	544967	4.0606e+06	1.58305e+06	810544	687599	3.99058e+06	219687	7.31647e+06	553438	5.90032e+06	207161	7.9512e+06	232057	3.3645e+06	732560	1.60403e+06	202762	450.358	450.358	450.358
0	AcCa(20:3)+H	AcCa(20:3)+H	AcCa	(20:3)	(20:3)				450.358	C27 H48 O4 N1	1.09233e+06	982889	2.13683e+06	1.46944e+06	288767	459715	311240	678014	303392	0	1.84734e+06	31205.5	682611	25423.5	2.04931e+06	800251	1.08131e+07	392931	2.64718e+06	218679	7.25354e+06	248114	4.84787e+06	1.73631e+06	4.54534e+06	402865	1.39581e+07	750661	1.15357e+07	292964	1.5735e+07	530492	3.15586e+07	75726.5	4.03152e+06	269052	450.358	450.358	450.358
0	AcCa(20:3)+H	AcCa(20:3)+H	AcCa	(20:3)	(20:3)				450.358	C27 H48 O4 N1	308743	91425.9	1.83412e+06	1.24576e+06	339260	32862.2	341161	0	215767	0	623212	0	1.2275e+06	62589.2	51589.4	1.50917e+06	1.31188e+06	833275	3.60212e+07	627922	5.98509e+06	235901	8.58253e+06	2.05976e+06	9.46132e+06	1.16137e+06	3.74803e+07	301665	1.20915e+07	416477	2.59551e+07	718806	2.52715e+08	319174	3.61548e+07	465715	450.358	450.358
0	AcCa(20:3)+H	AcCa(20:3)+H	AcCa	(20:3)	(20:3)				450.358	C27 H48 O4 N1	146642	0	0	0	258458	0	389199	0	0	0	224836	0	204775	0	0	5784.5	12488	0	408717	0	130532	0	788920	0	66415	2306.54	6.46362e+06	0	294386	0	1.18041e+06	8310.96	224342	22514.2	4.93261e+06	94583.7	450.358
0	AcCa(20:3)+H	AcCa(20:3)+H	AcCa	(20:3)	(20:3)				450.358	C27 H48 O4 N1	1.5645e+09	29714.1	5.82109e+08	0	7.16078e+08	71268.9	9.04235e+08	59832.2	3.16928e+08	39386.6	6.12828e+08	257924	1.08877e+09	292511	35938.6	4.57017e+08	33708.8	5.68302e+08	1.14643e+07	2.50928e+07	3.60807e+07	553833	16149	2.19504e+06	8.23123e+06	4.26087e+06	6.56703e+07	1.00353e+09	41873.3	1.20673e+09	1.53602e+07	1.35074e+09	1.208e+08	1.20384e+07	3.27536e+07	173796	450.357		450.358
0	AcCa(20:3)+H	AcCa(20:3)+H	AcCa	(20:3)	(20:3)				450.358	C27 H48 O4 N1	2.20694e+09	96163.3	1.44534e+09	108715	1.15817e+09	45011.8	1.21922e+09	52450.3	1.14914e+09	170576	1.16033e+09	817184	1.69786e+09	62134.2	0	1.295e+09	65416	8.54437e+08	31668.8	6.05539e+08	0	1.20056e+09	14332.4	1.46586e+09	53368.3	1.45621e+09	22392.7	1.51079e+09	33327.9	1.46739e+09	41446.5	1.64311e+09	0	3.56017e+06	43330.4	7.6532e+06			450.358
0	AcCa(20:3)+H	AcCa(20:3)+H	AcCa	(20:3)	(20:3)				450.358	C27 H48 O4 N1	2.84568e+08	78158.6	6.18537e+07	126067	4.73028e+07	141126	6.56709e+07	194320	7.02416e+07	99909.6	1.02634e+08	2.53282e+08	9.34509e+07	2.88838e+08	526744	1.00484e+08	9.73164e+06	1.48443e+08	36457.4	1.4286e+09	0	1.5747e+09	0	1.41047e+09	37367.6	1.88876e+09	50345.9	1.94235e+09	868920	1.40814e+09	945018	4.18609e+08	0	4.1568e+08	51266.6	1.81938e+09		450.358
1	AcCa(20:3)+H	AcCa(20:3)+H	AcCa	(20:3)	(20:3)				450.358	C27 H48 O4 N1	6.05364e+06	918558	7.40834e+07	2.28675e+06	4.95175e+07	672993	8.94736e+07	1.57545e+06	2.47985e+07	596182	404644	3.27905e+06	4.54609e+07	6.21139e+06	66403.1	7.22373e+07	1.72722e+06	1.13289e+08	31668.8	1.04213e+09	0	1.66283e+09	0	1.86794e+09	45619.5	1.47229e+09	0	7.96381e+08	0	7.09435e+08	361526	1.51663e+07	0	3.35346e+08	43330.4	1.5507e+09
0	AcCa(20:3)+H	AcCa(20:3)+H	AcCa	(20:3)	(20:3)				450.358	C27 H48 O4 N1	7.03767e+06	711602	6.01416e+07	1.11781e+06	3.75668e+07	2.41136e+06	3.9973e+06	1.57545e+06	1.75172e+07	596182	2.73257e+06	3.27905e+06	3.76878e+07	1.4091e+07	40134.5	6.0419e+07	838510	5.22399e+08	31668.8	1.16619e+09	0	1.59246e+09	0	1.79777e+09	37367.6	1.44302e+09	0	9.07731e+08	0	7.93441e+07	114341	4.83916e+07	0	2.09281e+07	43330.4	1.48258e+09
0	AcCa(20:3)+H	AcCa(20:3)+H	AcCa	(20:3)	(20:3)				450.358	C27 H48 O4 N1	4.28795e+07	2.84655e+06	1.3792e+08	1.50619e+06	2.43635e+07	1.05602e+07	2.47694e+08	1.97852e+07	6.18881e+07	1.71838e+07	7.89159e+07	1.66934e+08	8.178e+07	1.32706e+07	92572.8	1.92399e+07	2.30939e+06	1.48924e+07	0	85441644	0	1.92304e+06	0	7.63346e+06	0	4.32463e+07	56194.9	1.78103e+08	262220	1.3506e+08	139079	1.9591e+07	0	7.18691e+07	70212.6	2.778e+07	450.358	450.358	450.358
0	AcCa(20:3)+H	AcCa(20:3)+H	AcCa	(20:3)	(20:3)				450.358	C27 H48 O4 N1	4.30613e+07	8.5384e+06	2.74052e+07	806120	2.44372e+07	7.61254e+06	6.46979e+07	4.36196e+07	5.76692e+06	1.76715e+08	4.64766e+07	6.67872e+07	5.38727e+07	3.43887e+07	218029	4.98586e+07	1.59151e+06	2.52696e+08	0	7.1116e+07	0	1.08735e+08	124742	2.15053e+08	25187.8	2.13873e+08	124710	2.47403e+08	245553	2.31537e+08	118298	7.90215e+07	0	1.23079e+07	235011	7.37235e+06	450.358	450.358	450.357
1	AcCa(20:3)+H	AcCa(20:3)+H	AcCa	(20:3)	(20:3)				450.358	C27 H48 O4 N1	3.88906e+07	4.73992e+06	9.24749e+06	1.2192e+07	4.33095e+07	2.69069e+08	2.02444e+06	1.73351e+07	6.21053e+06	1.88434e+08	5.20185e+07	5.83382e+06	9.43274e+06	1.81809e+07	138880	1.49428e+07	5.42561e+06	1.14863e+07	0	7.1116e+07	0	1.07843e+07	103488	5.71121e+06	25187.8	2.13402e+08	145951	2.47403e+08	361708	2.57071e+06	244111	1.12322e+08	0	2.27904e+07	176021	7.37235e+06	450.358	450.358	450.358
0	AcCa(20:3)+H	AcCa(20:3)+H	AcCa	(20:3)	(20:3)				450.358	C27 H48 O4 N1	5.09227e+07	3.05471e+08	5.83865e+07	2.61673e+08	2.44829e+07	8.66058e+07	2.18642e+07	3.99275e+07	3.31257e+07	6.13032e+07	6.9375e+07	9.50437e+07	1.5091e+07	3.66316e+07	418490	1.76717e+07	6.89757e+07	1.19177e+07	58615.8	2.69832e+08	93561.7	2.88026e+08	54662.2	2.41733e+08	21999.5	7.1882e+07	87840.1	6.82177e+07	1.99676e+07	1.71034e+07	1.19833e+07	1.56415e+08	577628	1.61486e+06	158720	1.42945e+08		450.357
0	AcCa(20:3)+H	AcCa(20:3)+H	AcCa	(20:3)	(20:3)				450.358	C27 H48 O4 N1	3.41374e+07	6.80805e+07	4.28291e+07	6.27353e+07	1.50541e+07	3.03784e+07	1.10083e+07	3.05327e+07	2.69121e+07	2.12652e+07	7.37061e+07	1.68652e+07	9.3525e+06	1.56011e+07	402597	1.94355e+07	6.57049e+07	7.03922e+07	216309	1.67912e+08	61494.5	9.47298e+07	870340	1.35336e+07	28602.1	2.71748e+08	140603	3.34978e+07	7.05226e+06	8.15167e+06	4.2811e+06	3.01931e+07	286106	5.46842e+07	112247	2.08129e+08	450.358	450.358	450.358
0	AcCa(20:3)+H	AcCa(20:3)+H	AcCa	(20:3)	(20:3)				450.358	C27 H48 O4 N1	4.12416e+08	3.52784e+07	2.53066e+08	8.34527e+07	2.57357e+08	5.9876e+06	2.72287e+08	4.18901e+07	3.48052e+08	1.42984e+07	2.96285e+08	1.1e+08	3.17058e+08	1.11485e+08	2.35436e+08	3.24781e+08	1.50388e+08	2.35084e+08	1.33078e+07	8.52861e+07	1.03566e+06	3.08711e+08	9.74948e+06	2.48926e+08	568060	1.06213e+08	1.82834e+07	8.86403e+07	4.19247e+07	5.2381e+07	1.89582e+08	3.51693e+08	1.06217e+07	4.39692e+07	9.43272e+06	2.68146e+08		450.358
0	AcCa(22:0)+H	AcCa(22:0)+H	AcCa	(22:0)	(22:0)				484.436	C29 H58 O4 N1	194267	74598.2	213752	0	216155	0	255361	74799.1	160820	0	148666	0	147212	0	0	123628	0	0	0	1.64731e+06	0	2.03825e+07	0	2.40261e+07	0	227626	0	145613	0	0	0	0	0	74057.5	0	388376	484.436	484.436	484.436
0	BisMePA(14:1/14:1)+NH4	BisMePA(28:2)+NH4	BisMePA	(14:1/14:1)	(14:1)	(14:1)			634.444	C33 H65 O8 N1 P1	5.00278e+06	0	4.16651e+06	0	183987	0	402069	52687.1	2.54469e+06	0	5.91761e+06	0	4.55619e+06	53496.7	0	3.08099e+06	0	2.74467e+07	0	1.54948e+08	0	2.19907e+07	0	917408	0	180890	0	56736.2	0	125101	0	1.27466e+07	0	3.5291e+07	0	3.49643e+08	634.444		634.444
0	BisMePA(14:1/14:1)+NH4	BisMePA(28:2)+NH4	BisMePA	(14:1/14:1)	(14:1)	(14:1)			634.444	C33 H65 O8 N1 P1	0	0	0	0	96950.2	19392.3	0	6.67434e+06	80469.2	1.04028e+06	0	900550	0	29357.7	0	0	0	0	0	411424	0	84410.1	0	102451	0	42881.2	0	85372	0	1.69445e+07	0	5.60026e+06	0	4.3449e+08	0	2.16326e+07
0	BisMePA(14:1/14:1)+NH4	BisMePA(28:2)+NH4	BisMePA	(14:1/14:1)	(14:1)	(14:1)			634.444	C33 H65 O8 N1 P1	64225.4	244411	119017	1.06749e+06	76250.1	171421	131835	1.72964e+06	0	8.64375e+06	0	5.04428e+07	0	3.81481e+06	0	0	1.05707e+06	247985	0	77618.3	0	153227	0	95203.3	0	324773	0	2.33442e+06	0	0	0	162796	0	42230.8	0	34131.2	634.444	634.444	634.444
0	BisMePA(14:1/14:1)+NH4	BisMePA(28:2)+NH4	BisMePA	(14:1/14:1)	(14:1)	(14:1)			634.444	C33 H65 O8 N1 P1	62903.4	7.84552e+07	0	4.40357e+06	31458.8	31132.6	0	0	0	0	0	0	0	0	2.29645e+06	46346.9	8.17964e+06	0	0	2.28127e+06	0	1.52459e+07	0	2.07473e+07	0	0	0	0	76479.3	148013	73810.5	0	0	2.43694e+06	0	1.5966e+06	634.444	634.444
0	BisMePA(14:1/14:1)+NH4	BisMePA(28:2)+NH4	BisMePA	(14:1/14:1)	(14:1)	(14:1)			634.444	C33 H65 O8 N1 P1	33436.3	0	0	21349.6	0	8022.83	0	120610	0	0	0	988954	60512.7	59046.5	73226	0	150801	176559	2.33664e+06	228137	1.5628e+06	0	1.12039e+06	298108	17847.7	0	669055	0	502671	0	776641	0	62328.6	57830.9	2.33062e+06	0
0	BisMePA(14:1/14:1)+NH4	BisMePA(28:2)+NH4	BisMePA	(14:1/14:1)	(14:1)	(14:1)			634.444	C33 H65 O8 N1 P1	0	2757.79	0	309641	0	0	0	0	0	0	179923	0	0	0	0	0	570103	0	91144.7	0	16006.8	0	2465.69	0	21820.2	0	244125	0	0	0	0	133124	1.13103e+07	0	6.06734e+06	0		634.444
0	BisMePA(14:1/14:1)+NH4	BisMePA(28:2)+NH4	BisMePA	(14:1/14:1)	(14:1)	(14:1)			634.444	C33 H65 O8 N1 P1	0	171384	0	0	160673	0	105537	0	0	0	0	0	0	0	0	0	47669.4	0	0	0	0	0	0	169859	0	0	0	0	2.15708e+06	0	129157	0	0	0	0	0		634.444
0	BisMePA(14:1/14:1)+NH4	BisMePA(28:2)+NH4	BisMePA	(14:1/14:1)	(14:1)	(14:1)			634.444	C33 H65 O8 N1 P1	115419	0	38105.3	0	144237	0	175530	114308	0	0	131022	0	0	0	6.44755e+06	188565	227809	0	24419.5	0	0	0	133264	0	0	0	137033	0	158459	135744	153873	0	0	0	128864	0	634.444
0	BisMePA(20:1p/10:4)+NH4	BisMePA(30:5p)+NH4	BisMePA	(20:1p/10:4)	(20:1p)	(10:4)			640.434	C35 H63 O7 N1 P1	0	0	0	0	0	0	0	0	0	0	0	0	0	0	0	0	0	3800.4	0	0	0	0	0	0	0	0	0	0	0	122464	0	2.01998e+07	0	0	0	0
0	BisMePA(18:4/14:1)+NH4	BisMePA(32:5)+NH4	BisMePA	(18:4/14:1)	(18:4)	(14:1)			684.46	C37 H67 O8 N1 P1	155925	0	0	0	0	0	0	0	0	0	0	0	0	0	0	0	0	0	0	0	0	0	0	0	0	0	0	162655	0	2.93917e+07	0	0	0	0	0	0	684.46
0	BisMePA(18:4/14:1)+NH4	BisMePA(32:5)+NH4	BisMePA	(18:4/14:1)	(18:4)	(14:1)			684.46	C37 H67 O8 N1 P1	0	0	0	91760	0	0	0	0	0	0	0	0	0	0	0	0	0	0	0	0	0	109675	0	1.27447e+07	0	0	0	0	0	0	0	0	0	0	0	0
0	BisMePA(18:4/14:1)+NH4	BisMePA(32:5)+NH4	BisMePA	(18:4/14:1)	(18:4)	(14:1)			684.46	C37 H67 O8 N1 P1	0	0	0	0	0	0	0	0	0	0	0	0	0	0	0	0	0	0	0	0	44319.2	0	18712.5	0	0	0	2.21641e+06	0	0	0	0	0	0	0	0	0
0	CL(18:1/18:1/18:1/18:1)-2H	CL(72:4)-2H	CL	(18:1/18:1/18:1/18:1)	(18:1)	(18:1)	(18:1)	(18:1)	727.51	C81 H148 O17 P2	0	0	0	0	0	0	0	0	0	0	0	0	0	0	0	0	0	690259	0	0	0	0	0	0	0	0	0	0	0	0	0	0	0	0	0	0
0	CL(20:4/16:0/18:1/18:1)-2H	CL(72:6)-2H	CL	(20:4/16:0/18:1/18:1)	(20:4)	(16:0)	(18:1)	(18:1)	725.494	C81 H144 O17 P2	0	0	1228.88	0	4365.1	0	57392	0	0	0	2538.1	0	0	0	0	0	0	1.35378e+06	0	0	0	0	0	0	0	0	0	0	0	0	0	0	0	0	0	0			725.494
0	CL(20:4/16:1/18:1/18:1)-2H	CL(72:7)-2H	CL	(20:4/16:1/18:1/18:1)	(20:4)	(16:1)	(18:1)	(18:1)	724.487	C81 H142 O17 P2	0	0	0	0	0	0	0	0	0	0	0	0	0	0	0	0	0	0	0	0	0	0	0	0	0	641103	0	0	0	0	0	0	0	0	0	0
0	CL(18:2/18:1/20:4/18:1)-2H	CL(74:8)-2H	CL	(18:2/18:1/20:4/18:1)	(18:2)	(18:1)	(20:4)	(18:1)	737.494	C83 H144 O17 P2	0	0	188560	0	1.45734e+06	0	1.4488e+06	0	0	0	2912.09	0	0	0	0	0	0	2224.96	0	0	0	0	0	0	0	0	0	0	0	0	0	0	0	0	0	0			737.496
0	CL(18:2/18:1/20:4/18:2)-2H	CL(74:9)-2H	CL	(18:2/18:1/20:4/18:2)	(18:2)	(18:1)	(20:4)	(18:2)	736.487	C83 H142 O17 P2	0	0	51526	0	93850.7	0	0	0	0	0	170587	0	0	0	0	0	0	15699.2	0	0	0	0	0	0	0	0	0	0	0	0	0	0	0	0	0	0
0	CL(20:4/18:1/18:1/20:4)-2H	CL(76:10)-2H	CL	(20:4/18:1/18:1/20:4)	(20:4)	(18:1)	(18:1)	(20:4)	749.494	C85 H144 O17 P2	0	0	522832	0	479167	0	219018	0	0	0	803302	0	0	0	0	0	0	651580	0	0	0	0	0	0	0	0	0	43204.6	0	0	0	0	0	0	0	0
0	CL(20:4/18:1/18:1/20:4)-2H	CL(76:10)-2H	CL	(20:4/18:1/18:1/20:4)	(20:4)	(18:1)	(18:1)	(20:4)	749.494	C85 H144 O17 P2	0	0	0	0	0	0	0	0	0	0	0	0	0	0	0	0	0	0	0	0	0	0	0	0	0	127464	0	0	0	3.24548e+06	0	0	0	0	0	0
0	CL(18:2/20:4/20:4/18:1)-2H	CL(76:11)-2H	CL	(18:2/20:4/20:4/18:1)	(18:2)	(20:4)	(20:4)	(18:1)	748.487	C85 H142 O17 P2	0	0	1.16949e+06	0	13327.2	0	41817.7	0	0	0	91628.7	0	0	0	0	0	0	551310	0	0	0	0	0	0	0	0	0	0	0	0	0	0	0	0	0	0			748.488
0	CL(18:2/18:1/20:4/20:4)-2H	CL(76:11)-2H	CL	(18:2/18:1/20:4/20:4)	(18:2)	(18:1)	(20:4)	(20:4)	748.487	C85 H142 O17 P2	0	0	0	0	0	0	0	0	0	0	0	0	0	0	0	0	0	0	0	0	0	0	0	144439	0	0	0	0	0	1.2258e+06	0	109905	0	0	0	0
0	CL(18:2/20:4/20:4/18:1)-2H	CL(76:11)-2H	CL	(18:2/20:4/20:4/18:1)	(18:2)	(20:4)	(20:4)	(18:1)	748.487	C85 H142 O17 P2	0	0	0	0	0	0	0	0	0	0	0	0	0	0	0	0	0	0	0	0	0	221308	0	703371	0	1614.92	0	0	0	0	0	0	0	0	0	0
0	CL(22:6/18:1/20:4/18:1)-2H	CL(78:12)-2H	CL	(22:6/18:1/20:4/18:1)	(22:6)	(18:1)	(20:4)	(18:1)	761.494	C87 H144 O17 P2	0	0	1.00569e+06	0	6102.35	0	236039	0	0	0	3348.06	0	0	0	0	0	0	2.0122e+06	0	0	0	0	0	0	0	0	0	0	0	0	0	0	0	0	0	0			761.496
0	CL(22:6/18:1/18:1/20:4)-2H	CL(78:12)-2H	CL	(22:6/18:1/18:1/20:4)	(22:6)	(18:1)	(18:1)	(20:4)	761.494	C87 H144 O17 P2	0	0	0	0	0	0	0	0	0	0	0	0	0	0	0	0	0	0	0	0	0	0	0	69963.4	0	1.85953e+06	0	0	0	0	0	0	0	0	0	0
0	CL(18:2/20:4/22:6/18:1)-2H	CL(78:13)-2H	CL	(18:2/20:4/22:6/18:1)	(18:2)	(20:4)	(22:6)	(18:1)	760.487	C87 H142 O17 P2	0	0	262601	0	52514.8	0	0	0	0	0	62684.8	0	0	0	0	0	0	10688.5	0	0	0	0	0	0	0	0	0	0	0	0	0	0	0	0	0	0			760.487
0	Cer(d16:1+hO/12:0)+H	Cer(d28:1+hO)+H	Cer	(d16:1+hO/12:0)	(d16:1+hO)	(12:0)			470.42	C28 H56 O4 N1	2.18142e+06	0	5.32953e+06	0	3.59637e+06	0	5.69642e+06	0	5.55724e+06	0	2895.58	0	2283.25	0	0	377971	0	1.11923e+07	0	1683.69	0	56220.7	0	2621.19	0	1433.79	0	2897.87	0	0	0	146.678	0	0	0	2253.49	470.42		470.42
0	Cer(d16:1+hO/12:0)+H	Cer(d28:1+hO)+H	Cer	(d16:1+hO/12:0)	(d16:1+hO)	(12:0)			470.42	C28 H56 O4 N1	226510	0	3.04596e+06	0	6.67896e+06	0	4.65973e+06	0	609021	0	1.05612e+06	0	1.44276e+06	1218.23	0	1.20287e+06	0	1.78117e+06	0	4174.05	0	1760.93	0	2372.07	0	1496.32	0	0	0	9.6436e+06	0	2.43829e+06	0	281.173	0	276465	470.42		470.42
0	Cer(d28:1+hO)+H	Cer(d28:1+hO)+H	Cer	(d28:1+hO)	(d28:1+hO)				470.42	C28 H56 O4 N1	134823	0	0	0	0	0	0	0	0	0	0	0	215331	0	0	116734	0	342286	0	121311	0	0	0	0	0	142871	0	2.95107e+06	0	271838	0	64086.6	0	0	0	64156.5	470.42
0	Cer(d30:1+hO)+H	Cer(d30:1+hO)+H	Cer	(d30:1+hO)	(d30:1+hO)				498.452	C30 H60 O4 N1	2.30242e+06	0	2.49051e+06	0	3.51549e+06	0	3.22402e+06	0	382313	0	3.04316e+06	0	628201	0	0	413235	0	9.14392e+06	0	126823	0	60752.7	0	124019	0	237121	0	242640	0	330403	0	1.08912e+07	0	0	0	246776	498.452		498.452
0	Cer(d34:0)+H	Cer(d34:0)+H	Cer	(d34:0)	(d34:0)				540.535	C34 H70 O3 N1	3.99291e+06	0	4.49527e+06	0	4.05162e+06	0	4.06877e+06	0	3.09594e+06	0	3.05391e+06	0	748863	0	0	146487	0	279500	0	0	0	0	0	0	0	0	0	0	0	0	0	0	0	0	0	0	540.535		540.535
0	Cer(d34:0)+H	Cer(d34:0)+H	Cer	(d34:0)	(d34:0)				540.535	C34 H70 O3 N1	0	0	0	0	0	0	0	0	0	0	0	0	2910.2	0	0	0	0	0	0	0	0	0	0	0	0	0	0	0	0	4.7615e+06	0	1703.31	0	0	0	0
0	Cer(d16:0/18:1)+HCOO	Cer(d34:1)+HCOO	Cer	(d16:0/18:1)	(d16:0)	(18:1)			582.51	C35 H68 O5 N1	0	0	197102	0	0	0	0	0	0	0	0	0	0	0	0	0	0	2.80428e+06	0	0	0	0	0	0	0	0	0	0	0	0	0	0	0	0	0	0			582.51
0	Cer(d18:0+pO/18:0)+H-H2O	Cer(d36:0+pO)+H-H2O	Cer	(d18:0+pO/18:0)	(d18:0+pO)	(18:0)			566.551	C36 H72 O3 N1	0	0	0	0	0	0	0	0	0	0	0	0	0	0	0	0	0	0	0	0	0	0	80808.9	0	45528.9	0	2.11054e+06	0	8.12124e+06	0	1.66228e+07	0	146797	0	55004.6	0
0	Cer(d18:0+pO/18:0)+H-H2O	Cer(d36:0+pO)+H-H2O	Cer	(d18:0+pO/18:0)	(d18:0+pO)	(18:0)			566.551	C36 H72 O3 N1	0	0	0	0	0	0	0	0	0	0	0	0	0	0	0	0	0	0	4.07931e+06	0	0	0	0	0	0	0	0	0	0	0	0	0	0	0	0	0
0	Cer(d18:0+pO/18:0)+H-H2O	Cer(d36:0+pO)+H-H2O	Cer	(d18:0+pO/18:0)	(d18:0+pO)	(18:0)			566.551	C36 H72 O3 N1	7.43527e+06	0	2.21184e+08	0	1.64405e+08	0	1.98924e+08	0	5.69334e+06	0	1.91268e+08	0	3.09152e+06	0	0	4.38418e+06	0	3.19576e+08	0	220937	0	0	0	0	0	164732	0	0	0	0	0	0	0	0	0	0	566.551		566.55
0	Cer(d18:0+pO/18:0)+H-H2O	Cer(d36:0+pO)+H-H2O	Cer	(d18:0+pO/18:0)	(d18:0+pO)	(18:0)			566.551	C36 H72 O3 N1	0	0	0	0	0	0	0	0	0	4016.17	0	0	50948	0	0	0	0	25861.1	0	131872	0	88919	0	168683	0	0	0	0	0	0	0	7.21678e+07	0	0	0	0
0	Cer(d18:0+pO/18:0)+H-H2O	Cer(d36:0+pO)+H-H2O	Cer	(d18:0+pO/18:0)	(d18:0+pO)	(18:0)			566.551	C36 H72 O3 N1	0	0	0	0	0	0	0	0	0	0	0	0	0	0	0	0	0	0	24464.3	0	0	0	0	0	0	0	0	0	0	2.86551e+08	0	723923	0	0	0	263923
0	Cer(d18:0+pO/18:0)+H-H2O	Cer(d36:0+pO)+H-H2O	Cer	(d18:0+pO/18:0)	(d18:0+pO)	(18:0)			566.551	C36 H72 O3 N1	0	0	0	0	0	0	0	0	0	0	0	1594.66	0	1814.5	0	0	0	0	0	0	0	0	0	0	0	0	0	3.71999e+07	0	0	0	0	0	0	0	0
0	Cer(d18:0+pO/18:0)+H-H2O	Cer(d36:0+pO)+H-H2O	Cer	(d18:0+pO/18:0)	(d18:0+pO)	(18:0)			566.551	C36 H72 O3 N1	244289	0	0	0	0	0	0	0	0	0	0	0	0	0	0	0	0	0	0	0	0	0	0	0	0	3.09757e+08	0	0	0	0	0	0	0	0	0	0	566.551
0	Cer(d18:0+pO/18:0)+H-H2O	Cer(d36:0+pO)+H-H2O	Cer	(d18:0+pO/18:0)	(d18:0+pO)	(18:0)			566.551	C36 H72 O3 N1	0	0	0	82267.4	0	112647	145429	179497	0	0	0	0	0	0	0	0	0	0	0	1.91518e+08	0	2.31485e+08	0	3.7349e+08	0	0	0	0	0	0	0	0	0	0	0	0
0	Cer(d18:0+pO/18:0)+H-H2O	Cer(d36:0+pO)+H-H2O	Cer	(d18:0+pO/18:0)	(d18:0+pO)	(18:0)			566.551	C36 H72 O3 N1	0	0	0	134535	0	0	1415.07	0	0	0	0	1108.97	0	0	0	0	126043	0	0	0	0	0	0	533376	0	0	0	0	0	0	0	0	0	0	0	3.48556e+07
0	Cer(d18:1/18:0)+H	Cer(d36:1)+H	Cer	(d18:1/18:0)	(d18:1)	(18:0)			566.551	C36 H72 O3 N1	0	1.99508e+07	0	6.59613e+06	0	93788.9	0	170893	0	9157.19	0	262007	0	147044	1.19618e+07	0	2.03209e+06	0	0	0	0	27563.6	0	0	0	0	0	0	0	0	0	0	0	0	0	43647.9		566.551
0	Cer(d18:1/18:0)+HCOO	Cer(d36:1)+HCOO	Cer	(d18:1/18:0)	(d18:1)	(18:0)			610.542	C37 H72 O5 N1	0	0	0	0	0	0	0	0	0	0	0	0	0	0	0	0	0	0	0	0	0	0	0	0	0	0	2.69938e+06	0	1.21871e+06	0	299203	0	0	0	0	0
0	Cer(d18:1/18:0)+H	Cer(d36:1)+H	Cer	(d18:1/18:0)	(d18:1)	(18:0)			566.551	C36 H72 O3 N1	0	0	0	0	0	0	0	0	0	0	0	0	0	0	0	0	0	0	0	0	0	0	80808.9	0	45528.9	0	7.71849e+06	0	154424	0	3.10549e+06	0	146797	0	55004.6	0
0	Cer(d18:1/18:0)+H	Cer(d36:1)+H	Cer	(d18:1/18:0)	(d18:1)	(18:0)			566.551	C36 H72 O3 N1	0	0	0	0	0	0	0	0	0	0	0	0	0	0	0	0	0	0	8288.23	0	40913.9	0	0	0	252443	0	0	0	0	0	0	0	0	0	319172	0
0	Cer(d18:1/18:0)-H	Cer(d36:1)-H	Cer	(d18:1/18:0)	(d18:1)	(18:0)			564.536	C36 H70 O3 N1	0	0	1.50968e+06	0	2279.98	0	0	0	0	0	0	0	0	0	0	0	0	9298.77	0	0	0	0	0	0	0	0	0	0	0	0	0	0	0	0	0	0			564.536
0	Cer(d18:1/18:0)+HCOO	Cer(d36:1)+HCOO	Cer	(d18:1/18:0)	(d18:1)	(18:0)			610.542	C37 H72 O5 N1	5.78301e+06	0	1.19996e+08	0	9.53245e+07	0	1.23507e+08	0	3.08005e+06	0	1.22493e+08	0	1.97595e+06	0	0	1.69836e+06	0	1.95441e+08	18006.6	0	0	0	0	0	0	0	0	0	0	0	0	0	0	0	0	0	610.543		610.542
0	Cer(d18:1/18:0)+H	Cer(d36:1)+H	Cer	(d18:1/18:0)	(d18:1)	(18:0)			566.551	C36 H72 O3 N1	7.47141e+06	0	2.21864e+08	0	1.65203e+08	0	1.99068e+08	0	5.64516e+06	0	1.91771e+08	0	3.27581e+06	0	0	3.24149e+06	0	3.22626e+08	0	220937	0	0	0	0	0	164732	0	0	0	0	0	0	0	0	0	0	566.551		566.551
0	Cer(d18:1/18:0)+H-H2O	Cer(d36:1)+H-H2O	Cer	(d18:1/18:0)	(d18:1)	(18:0)			548.54	C36 H70 O2 N1	3032.24	0	1.49926e+07	0	1.28499e+07	0	1.78597e+07	0	348101	0	1.72639e+07	0	155970	0	0	35997.9	0	1.92261e+07	0	0	0	0	0	0	0	0	0	0	0	4708.83	0	0	0	0	0	0	548.54		548.54
0	Cer(d18:1/18:0)+HCOO	Cer(d36:1)+HCOO	Cer	(d18:1/18:0)	(d18:1)	(18:0)			610.542	C37 H72 O5 N1	0	0	0	0	0	0	0	0	0	0	0	0	0	0	0	0	0	0	0	0	0	0	0	0	0	0	0	0	0	0	0	3.81914e+07	0	0	0	0
0	Cer(d18:1/18:0)+HCOO	Cer(d36:1)+HCOO	Cer	(d18:1/18:0)	(d18:1)	(18:0)			610.542	C37 H72 O5 N1	0	0	0	0	0	0	0	0	0	0	0	0	0	0	0	0	0	0	0	0	0	0	0	0	0	0	0	0	0	1.2327e+08	0	0	0	0	0	0
0	Cer(d18:1/18:0)+HCOO	Cer(d36:1)+HCOO	Cer	(d18:1/18:0)	(d18:1)	(18:0)			610.542	C37 H72 O5 N1	0	0	0	0	0	0	0	0	0	0	0	0	0	0	0	0	0	0	0	0	0	0	0	0	0	515.489	0	9.49774e+06	0	0	0	0	0	0	0	0
0	Cer(d18:1/18:0)+HCOO	Cer(d36:1)+HCOO	Cer	(d18:1/18:0)	(d18:1)	(18:0)			610.542	C37 H72 O5 N1	0	0	0	0	0	0	0	0	0	0	0	0	0	0	0	0	0	0	0	0	0	0	0	2987.47	0	7.99784e+07	0	0	0	0	0	0	0	0	0	0
0	Cer(d18:1/18:0)+HCOO	Cer(d36:1)+HCOO	Cer	(d18:1/18:0)	(d18:1)	(18:0)			610.542	C37 H72 O5 N1	0	0	0	24021.4	0	0	0	0	0	0	0	0	0	0	0	0	0	0	0	3.6143e+07	0	5.60768e+07	0	1.10886e+08	0	0	0	0	0	0	0	0	0	0	0	0
0	Cer(d18:1/18:0)+HCOO	Cer(d36:1)+HCOO	Cer	(d18:1/18:0)	(d18:1)	(18:0)			610.542	C37 H72 O5 N1	0	0	0	0	0	0	0	0	0	0	0	0	0	0	0	0	0	0	0	0	0	0	0	0	0	0	0	0	0	0	0	0	0	0	0	8.37916e+06
0	Cer(d18:1+hO/18:0)+H-H2O	Cer(d36:1+hO)+H-H2O	Cer	(d18:1+hO/18:0)	(d18:1+hO)	(18:0)			564.535	C36 H70 O3 N1	0	0	0	0	0	0	0	0	0	0	0	0	0	0	0	0	0	0	0	0	0	0	0	0	0	3.25402e+07	0	0	0	0	0	0	0	0	0	0
0	Cer(d18:1+hO/18:0)+H-H2O	Cer(d36:1+hO)+H-H2O	Cer	(d18:1+hO/18:0)	(d18:1+hO)	(18:0)			564.535	C36 H70 O3 N1	0	0	0	0	0	0	0	0	0	0	0	0	0	0	0	0	0	0	0	0	0	0	0	0	0	0	0	0	0	0	0	0	0	0	0	7.36662e+06
0	Cer(d18:2/18:0)+HCOO	Cer(d36:2)+HCOO	Cer	(d18:2/18:0)	(d18:2)	(18:0)			608.526	C37 H70 O5 N1	879342	0	28885.1	0	1.1019e+07	0	1.75003e+07	0	2815.42	0	8.24375e+06	0	3914.1	0	0	0	0	25004.3	0	0	0	0	0	0	0	0	0	0	0	0	0	0	0	0	0	0	608.526		608.525
0	Cer(d18:2/18:0)+H	Cer(d36:2)+H	Cer	(d18:2/18:0)	(d18:2)	(18:0)			564.535	C36 H70 O3 N1	1.16469e+06	0	2.89734e+06	0	8.93652e+06	0	104387	0	513450	0	7.93514e+06	0	0	0	0	1829.27	0	1.09055e+07	0	0	0	0	0	0	0	0	0	0	0	0	0	0	0	0	0	0	564.535		564.535
0	Cer(d18:2/18:0)+HCOO	Cer(d36:2)+HCOO	Cer	(d18:2/18:0)	(d18:2)	(18:0)			608.526	C37 H70 O5 N1	0	0	0	0	0	0	0	0	0	0	0	0	0	0	0	0	0	0	0	0	0	0	0	0	0	0	0	0	0	0	0	12212.6	0	0	0	0
0	Cer(d18:2/18:0)+H	Cer(d36:2)+H	Cer	(d18:2/18:0)	(d18:2)	(18:0)			564.535	C36 H70 O3 N1	0	0	0	0	0	0	0	0	0	0	0	0	0	0	0	0	0	211525	0	0	0	0	0	0	0	0	0	0	0	0	0	1.14283e+07	0	0	0	0
0	Cer(d18:2/18:0)+HCOO	Cer(d36:2)+HCOO	Cer	(d18:2/18:0)	(d18:2)	(18:0)			608.526	C37 H70 O5 N1	0	0	0	0	0	0	0	0	0	0	0	0	0	0	0	0	0	0	0	0	0	0	0	0	0	0	0	0	0	1.21583e+07	0	0	0	0	0	0
0	Cer(d18:2/18:0)+HCOO	Cer(d36:2)+HCOO	Cer	(d18:2/18:0)	(d18:2)	(18:0)			608.526	C37 H70 O5 N1	0	0	0	0	0	0	0	0	0	0	0	0	0	0	0	0	0	0	0	0	0	0	0	0	0	1.48313e+07	0	0	0	0	0	0	0	0	0	0
0	Cer(d18:2/18:0)+HCOO	Cer(d36:2)+HCOO	Cer	(d18:2/18:0)	(d18:2)	(18:0)			608.526	C37 H70 O5 N1	0	0	0	0	0	0	0	0	0	0	0	0	0	0	0	0	0	0	0	4.89264e+06	0	8.33112e+06	0	1.77593e+07	0	0	0	0	0	0	0	112892	0	0	23761.9	0
0	Cer(d18:2/18:0)+H	Cer(d36:2)+H	Cer	(d18:2/18:0)	(d18:2)	(18:0)			564.535	C36 H70 O3 N1	0	0	0	0	0	0	0	0	0	0	0	0	0	0	0	0	0	0	0	1.11452e+06	0	2.12213e+07	0	5.59986e+07	0	0	0	0	0	0	0	0	0	0	0	0
0	Cer(d18:2/18:0)+HCOO	Cer(d36:2)+HCOO	Cer	(d18:2/18:0)	(d18:2)	(18:0)			608.526	C37 H70 O5 N1	0	0	0	0	0	0	0	0	0	0	0	0	0	0	0	0	0	0	0	0	0	0	0	0	0	0	0	0	0	0	0	0	0	861716	0	0
0	Cer(d18:2/18:0)+H	Cer(d36:2)+H	Cer	(d18:2/18:0)	(d18:2)	(18:0)			564.535	C36 H70 O3 N1	0	0	0	0	0	0	0	0	0	0	0	0	0	0	0	0	0	0	0	0	0	0	0	0	0	0	0	0	0	0	0	0	0	8.50335e+06	0	0
0	Cer(d20:0+pO/18:0)+H-H2O	Cer(d38:0+pO)+H-H2O	Cer	(d20:0+pO/18:0)	(d20:0+pO)	(18:0)			594.582	C38 H76 O3 N1	683614	0	3.48489e+07	0	284221	0	2.80125e+07	0	193340	0	3.02362e+07	0	0	0	0	0	0	5.15822e+07	0	90691.3	0	2336.92	0	0	0	0	0	0	0	0	0	0	0	1253.46	0	0	594.582		594.582
0	Cer(d18:0+pO/20:0)+H-H2O	Cer(d38:0+pO)+H-H2O	Cer	(d18:0+pO/20:0)	(d18:0+pO)	(20:0)			594.582	C38 H76 O3 N1	0	0	0	0	0	0	4822.8	0	0	0	0	0	0	0	0	212080	0	0	0	0	0	378274	0	0	0	0	0	0	0	7.10278e+07	0	441184	0	96340.9	0	0
0	Cer(d20:0+pO/18:0)+H-H2O	Cer(d38:0+pO)+H-H2O	Cer	(d20:0+pO/18:0)	(d20:0+pO)	(18:0)			594.582	C38 H76 O3 N1	0	0	0	0	0	0	0	0	0	121776	0	0	0	0	0	0	0	0	0	497476	0	56823.1	0	6.39044e+07	0	4.40253e+07	0	0	0	0	0	0	0	0	0	0
0	Cer(d20:0+pO/18:0)+H-H2O	Cer(d38:0+pO)+H-H2O	Cer	(d20:0+pO/18:0)	(d20:0+pO)	(18:0)			594.582	C38 H76 O3 N1	0	0	0	0	0	0	0	0	0	0	0	0	0	0	0	0	0	0	0	3.07482e+07	0	0	0	0	0	0	0	0	0	0	0	0	0	0	0	0
0	Cer(d18:1/20:0)+HCOO	Cer(d38:1)+HCOO	Cer	(d18:1/20:0)	(d18:1)	(20:0)			638.573	C39 H76 O5 N1	4541.92	0	2.1011e+07	0	1.68318e+07	0	2.09703e+07	0	79265.1	0	2.06175e+07	0	1780.52	0	0	121515	0	3.37732e+07	0	0	0	0	0	0	0	0	0	0	0	0	0	0	0	0	0	0	638.573		638.573
0	Cer(d18:1/20:0)+HCOO	Cer(d38:1)+HCOO	Cer	(d18:1/20:0)	(d18:1)	(20:0)			638.573	C39 H76 O5 N1	0	0	0	0	0	0	0	0	0	0	0	0	0	0	0	0	0	0	0	0	0	0	0	0	0	0	0	0	0	2.923e+07	0	7.36162e+06	0	0	0	0
0	Cer(d20:1/18:0)+HCOO	Cer(d38:1)+HCOO	Cer	(d20:1/18:0)	(d20:1)	(18:0)			638.573	C39 H76 O5 N1	0	0	0	0	0	0	0	0	0	0	0	0	0	0	0	0	0	0	0	0	0	8.97415e+06	0	2.04037e+07	0	1.31075e+07	0	0	0	0	0	0	0	0	0	0
0	Cer(d20:1/18:0)+HCOO	Cer(d38:1)+HCOO	Cer	(d20:1/18:0)	(d20:1)	(18:0)			638.573	C39 H76 O5 N1	0	0	0	0	0	0	0	0	0	0	0	0	0	0	0	0	0	0	0	5.86842e+06	0	0	0	0	0	0	0	0	0	0	0	0	0	0	0	0
0	Cer(d38:3+pO)+H-H2O	Cer(d38:3+pO)+H-H2O	Cer	(d38:3+pO)	(d38:3+pO)				588.535	C38 H70 O3 N1	2.45048e+06	0	810551	0	451252	0	0	0	214809	0	0	0	0	0	0	66163.2	0	2.06173e+07	0	0	0	0	0	0	0	0	0	0	0	0	0	0	0	0	0	0	588.535		588.535
0	Cer(d18:1/21:0)+HCOO	Cer(d39:1)+HCOO	Cer	(d18:1/21:0)	(d18:1)	(21:0)			652.589	C40 H78 O5 N1	0	0	0	0	0	0	0	0	0	0	0	0	0	0	0	0	0	0	0	0	0	0	0	0	0	0	0	0	0	2.58792e+06	0	0	0	0	0	0
0	Cer(d18:0+pO/22:0)+H-H2O	Cer(d40:0+pO)+H-H2O	Cer	(d18:0+pO/22:0)	(d18:0+pO)	(22:0)			622.613	C40 H80 O3 N1	0	0	0	0	0	0	0	0	0	0	0	0	0	0	0	0	0	0	0	0	0	0	0	0	0	0	0	0	0	1.34268e+07	0	0	0	0	0	0
0	Cer(d18:1/22:0)+HCOO	Cer(d40:1)+HCOO	Cer	(d18:1/22:0)	(d18:1)	(22:0)			666.604	C41 H80 O5 N1	0	0	2.54138e+06	0	1.59727e+06	0	484495	0	0	0	1.05396e+06	0	0	0	0	1108.59	0	9113.45	0	0	0	0	0	0	0	0	0	0	0	0	0	0	0	0	0	0			666.604
0	Cer(d18:1/22:0)+HCOO	Cer(d40:1)+HCOO	Cer	(d18:1/22:0)	(d18:1)	(22:0)			666.604	C41 H80 O5 N1	0	0	0	0	0	0	0	0	0	0	0	0	0	0	0	0	0	0	0	0	0	0	0	0	0	0	0	0	0	5.49712e+06	0	0	0	0	0	0
0	Cer(d17:0+pO/24:0)+CH3COO	Cer(d41:0+pO)+CH3COO	Cer	(d17:0+pO/24:0)	(d17:0+pO)	(24:0)			712.646	C43 H86 O6 N1	0	0	0	0	0	0	950154	0	0	0	0	0	62322	0	0	0	0	0	0	0	0	0	0	0	0	0	0	0	0	0	0	0	0	0	0	0
0	Cer(d17:0+pO/24:0)+CH3COO	Cer(d41:0+pO)+CH3COO	Cer	(d17:0+pO/24:0)	(d17:0+pO)	(24:0)			712.646	C43 H86 O6 N1	0	0	0	0	0	0	0	0	0	0	0	0	0	0	0	0	0	0	0	0	0	0	0	0	0	0	0	0	0	0	0	1.44074e+06	0	0	0	0
0	Cer(d17:0+pO/24:0)+CH3COO	Cer(d41:0+pO)+CH3COO	Cer	(d17:0+pO/24:0)	(d17:0+pO)	(24:0)			712.646	C43 H86 O6 N1	0	0	0	0	0	0	0	0	0	0	0	0	0	0	0	0	0	0	0	1.8712e+06	0	0	0	0	0	0	0	0	0	0	0	0	0	0	0	0
0	Cer(d16:0+pO/26:0)+CH3COO	Cer(d42:0+pO)+CH3COO	Cer	(d16:0+pO/26:0)	(d16:0+pO)	(26:0)			726.662	C44 H88 O6 N1	53432.1	0	405356	0	1.1717e+06	0	162500	0	631426	0	201324	0	68766.4	0	0	0	0	0	0	0	0	0	0	0	0	0	0	0	0	0	0	0	0	0	0	0	726.662		726.662
0	Cer(d18:0+pO/24:0+O)+HCOO	Cer(d42:0+pO+O)+HCOO	Cer	(d18:0+pO/24:0+O)	(d18:0+pO)	(24:0+O)			728.641	C43 H86 O7 N1	0	0	0	0	0	0	0	0	0	0	0	0	0	0	0	0	0	0	9353.32	0	0	0	0	0	0	0	0	0	0	1.2806e+06	0	0	0	0	0	0
0	Cer(d18:1/24:0)+H	Cer(d42:1)+H	Cer	(d18:1/24:0)	(d18:1)	(24:0)			650.645	C42 H84 O3 N1	0	0	0	0	0	0	0	0	0	0	0	0	0	0	0	0	0	0	0	0	0	0	924.864	0	0	0	0	0	1.32498e+06	0	4083.16	0	114.11	0	0	0
0	Cer(d18:1/24:0+O)+HCOO	Cer(d42:1+O)+HCOO	Cer	(d18:1/24:0+O)	(d18:1)	(24:0+O)			710.63	C43 H84 O6 N1	0	0	0	0	0	0	0	0	0	0	0	0	0	0	0	0	0	0	0	0	0	0	0	0	0	0	0	0	0	2.12791e+06	0	0	0	0	0	0
0	Cer(d18:1+hO/24:0+O)+HCOO	Cer(d42:1+hO+O)+HCOO	Cer	(d18:1+hO/24:0+O)	(d18:1+hO)	(24:0+O)			726.625	C43 H84 O7 N1	340592	0	1.28371e+06	0	2.36802e+06	0	0	0	961630	0	179417	0	0	0	0	0	0	5818.67	0	0	0	0	0	0	0	0	0	0	0	0	0	0	0	0	0	0	726.625		726.625
0	Cer(d18:1/24:1)+HCOO	Cer(d42:2)+HCOO	Cer	(d18:1/24:1)	(d18:1)	(24:1)			692.62	C43 H82 O5 N1	0	0	0	0	0	0	0	0	0	0	0	0	0	0	0	0	0	0	0	0	0	0	0	0	0	0	0	0	0	7.71982e+06	0	0	0	0	0	0
0	Cer(d18:1/24:1)+H	Cer(d42:2)+H	Cer	(d18:1/24:1)	(d18:1)	(24:1)			648.629	C42 H82 O3 N1	0	0	0	0	0	0	0	0	0	0	0	0	0	0	0	0	0	0	0	0	0	0	0	0	0	0	0	0	0	3.32595e+07	0	0	0	0	0	0
0	Cer(d18:1/24:1)+HCOO	Cer(d42:2)+HCOO	Cer	(d18:1/24:1)	(d18:1)	(24:1)			692.62	C43 H82 O5 N1	0	0	0	0	0	0	0	0	0	0	0	0	0	0	0	0	0	0	0	0	0	630920	0	3.24359e+06	0	2.67162e+06	0	0	0	0	0	0	0	0	0	0
0	Cer(d18:0+pO/25:0)+HCOO	Cer(d43:0+pO)+HCOO	Cer	(d18:0+pO/25:0)	(d18:0+pO)	(25:0)			726.662	C44 H88 O6 N1	0	0	0	0	0	0	0	0	0	0	0	0	0	0	0	0	0	0	0	1.79325e+06	0	1.04822e+06	0	2.16822e+06	0	0	0	0	0	0	0	0	27510	0	24193.3	0
0	Cer(d20:0+pO/24:0)+CH3COO	Cer(d44:0+pO)+CH3COO	Cer	(d20:0+pO/24:0)	(d20:0+pO)	(24:0)			754.693	C46 H92 O6 N1	0	0	2300.46	0	1.50574e+06	0	742986	0	529783	0	1712.06	0	476423	0	0	796889	0	2.14278e+06	0	0	0	0	0	0	0	0	0	0	0	0	0	0	0	0	0	0			754.693
0	Cer(d20:0+pO/24:0)+H	Cer(d44:0+pO)+H	Cer	(d20:0+pO/24:0)	(d20:0+pO)	(24:0)			696.686	C44 H90 O4 N1	449875	0	2.92148e+06	0	1.00168e+07	0	444827	0	3.05221e+06	0	1.68427e+06	0	374338	0	0	0	0	0	0	6247.55	0	0	0	100559	0	4147.16	0	200041	0	0	0	0	0	0	0	0	696.686		696.686
0	Cer(d18:0+pO/26:0)+HCOO	Cer(d44:0+pO)+HCOO	Cer	(d18:0+pO/26:0)	(d18:0+pO)	(26:0)			740.677	C45 H90 O6 N1	0	0	0	0	0	0	0	0	0	0	0	0	0	0	0	0	0	0	0	0	0	725041	0	3.62757e+06	0	0	0	0	0	0	0	0	0	0	0	0
0	Cer(d20:0+pO/24:0+O)+H	Cer(d44:0+pO+O)+H	Cer	(d20:0+pO/24:0+O)	(d20:0+pO)	(24:0+O)			712.681	C44 H90 O5 N1	0	0	0	0	0	0	0	0	0	0	0	0	0	0	0	0	0	0	0	0	0	0	0	0	0	0	0	0	3.17599e+06	0	4232.95	0	0	0	0	0
0	Cer(d20:0+pO/24:0+O)+H	Cer(d44:0+pO+O)+H	Cer	(d20:0+pO/24:0+O)	(d20:0+pO)	(24:0+O)			712.681	C44 H90 O5 N1	0	0	3.15172e+06	0	1.85105e+06	0	344242	0	175570	0	323972	0	238754	0	0	728213	0	446220	0	0	0	0	0	0	0	0	0	0	0	0	0	0	0	0	0	0			712.681
0	Cer(d20:0+pO/25:0)+H	Cer(d45:0+pO)+H	Cer	(d20:0+pO/25:0)	(d20:0+pO)	(25:0)			710.702	C45 H92 O4 N1	550655	0	2.40054e+06	0	8.47547e+06	0	1.19857e+06	0	2.42185e+06	0	1.52655e+06	0	367868	0	0	430845	0	1.19929e+07	0	0	0	0	0	335263	0	0	0	98187.8	0	604204	0	0	0	0	0	115485	710.702		710.702
0	Cer(d20:0+pO/25:0)+HCOO	Cer(d45:0+pO)+HCOO	Cer	(d20:0+pO/25:0)	(d20:0+pO)	(25:0)			754.693	C46 H92 O6 N1	0	0	0	0	0	0	0	0	0	0	0	0	0	0	0	0	0	0	0	0	0	0	0	0	0	0	0	0	0	2.14494e+06	0	1.15882e+06	0	0	0	0
0	Cer(d20:0+pO/25:0)+H	Cer(d45:0+pO)+H	Cer	(d20:0+pO/25:0)	(d20:0+pO)	(25:0)			710.702	C45 H92 O4 N1	0	0	0	0	1.68372e+06	0	0	0	3447.29	0	0	0	0	0	0	9907.47	0	2.16945e+06	0	0	0	0	0	0	0	0	0	808433	0	173042	0	5.63524e+06	0	0	0	0
0	Cer(d20:0+pO/25:0)+HCOO	Cer(d45:0+pO)+HCOO	Cer	(d20:0+pO/25:0)	(d20:0+pO)	(25:0)			754.693	C46 H92 O6 N1	0	0	0	0	0	0	0	0	0	0	0	0	0	0	0	0	0	0	0	0	0	3697.94	0	2.22458e+06	0	0	0	0	0	0	0	0	0	0	0	0
0	Cer(d18:0+pO/27:0+O)-H	Cer(d45:0+pO+O)-H	Cer	(d18:0+pO/27:0+O)	(d18:0+pO)	(27:0+O)			724.682	C45 H90 O5 N1	0	0	0	0	0	0	0	0	0	0	0	0	0	0	0	0	0	0	0	0	0	110138	0	0	0	0	0	0	0	1.47917e+06	0	0	0	0	0	0
0	Cer(d18:0+pO/27:0+O)-H	Cer(d45:0+pO+O)-H	Cer	(d18:0+pO/27:0+O)	(d18:0+pO)	(27:0+O)			724.682	C45 H90 O5 N1	0	0	0	0	0	0	0	0	0	0	0	0	0	0	0	0	0	0	0	0	0	91235.5	0	1.67304e+06	0	0	0	0	0	0	0	0	0	0	0	0
0	Cer(d20:0+pO/26:0)+HCOO	Cer(d46:0+pO)+HCOO	Cer	(d20:0+pO/26:0)	(d20:0+pO)	(26:0)			768.709	C47 H94 O6 N1	399406	0	1.81995e+06	0	4.31351e+06	0	318526	0	3.15675e+06	0	619396	0	78246.7	0	0	785862	0	9244.46	0	0	0	0	0	0	0	0	0	0	0	0	0	0	0	0	0	0	768.709		768.709
0	Cer(d20:0+pO/26:0)+CH3COO	Cer(d46:0+pO)+CH3COO	Cer	(d20:0+pO/26:0)	(d20:0+pO)	(26:0)			782.724	C48 H96 O6 N1	0	0	6814.29	0	1.76537e+06	0	1.31062e+06	0	1.10729e+06	0	253381	0	247774	0	0	876124	0	2.54184e+06	0	0	0	0	0	0	0	0	0	0	0	0	0	0	0	0	0	0			782.724
0	Cer(d20:0+pO/26:0)+H	Cer(d46:0+pO)+H	Cer	(d20:0+pO/26:0)	(d20:0+pO)	(26:0)			724.718	C46 H94 O4 N1	4.30574e+06	0	9.54308e+06	0	1.69065e+07	0	9.5601e+06	0	5.0109e+06	0	4.26643e+06	0	4.08525e+06	0	0	9.22547e+06	0	2.62476e+07	0	0	0	0	0	0	0	203317	0	233151	0	564158	0	224809	0	0	0	0	724.718		724.716
0	Cer(d20:0+pO/26:0)+HCOO	Cer(d46:0+pO)+HCOO	Cer	(d20:0+pO/26:0)	(d20:0+pO)	(26:0)			768.709	C47 H94 O6 N1	0	0	0	0	0	0	0	0	0	0	0	0	0	0	0	0	0	0	0	0	0	0	0	0	0	0	0	0	0	4.50029e+06	0	4.00799e+06	0	0	0	0
0	Cer(d20:0+pO/26:0)+CH3COO	Cer(d46:0+pO)+CH3COO	Cer	(d20:0+pO/26:0)	(d20:0+pO)	(26:0)			782.724	C48 H96 O6 N1	0	0	0	18087.9	0	0	0	0	0	0	0	0	0	0	0	0	0	0	0	0	0	0	0	0	0	0	0	0	0	2.00816e+06	0	1.60656e+06	0	0	0	0
0	Cer(d20:0+pO/26:0)+H	Cer(d46:0+pO)+H	Cer	(d20:0+pO/26:0)	(d20:0+pO)	(26:0)			724.718	C46 H94 O4 N1	0	0	0	0	0	0	0	0	0	0	0	0	0	0	0	0	0	0	0	505493	0	0	0	0	0	0	0	0	0	2.4937e+07	0	970300	0	0	102972	0
1	Cer(d20:0+pO/26:0)+HCOO	Cer(d46:0+pO)+HCOO	Cer	(d20:0+pO/26:0)	(d20:0+pO)	(26:0)			768.709	C47 H94 O6 N1	0	0	0	0	0	0	0	0	0	0	0	0	0	0	0	0	0	0	0	0	0	0	0	0	0	0	0	1.92076e+06	0	0	0	0	0	0	0	0
0	Cer(d20:0+pO/26:0)+HCOO	Cer(d46:0+pO)+HCOO	Cer	(d20:0+pO/26:0)	(d20:0+pO)	(26:0)			768.709	C47 H94 O6 N1	264218	0	1.79843e+06	0	4.4301e+06	0	2.60093e+06	0	2.10104e+06	0	658111	0	439080	0	0	2.33931e+06	0	4.4693e+06	59078.1	0	21088.8	1.35788e+06	21964.4	5.06373e+06	13268.1	374735	0	2.5568e+06	0	4.60539e+06	0	4.0557e+06	0	0	0	0
0	Cer(d20:0+pO/26:0)+CH3COO	Cer(d46:0+pO)+CH3COO	Cer	(d20:0+pO/26:0)	(d20:0+pO)	(26:0)			782.724	C48 H96 O6 N1	61987	0	476312	14464.4	1.77149e+06	0	1.21412e+06	0	1.11476e+06	41275.9	305717	0	224333	0	0	1.10318e+06	0	2.5898e+06	0	0	0	107383	0	1.99135e+06	0	221053	7260.42	707196	43041.5	2.0298e+06	0	1.61227e+06	15937.7	0	0	0
0	Cer(d20:0+pO/26:0)+H	Cer(d46:0+pO)+H	Cer	(d20:0+pO/26:0)	(d20:0+pO)	(26:0)			724.718	C46 H94 O4 N1	5.51166e+06	0	1.25635e+07	52511.8	3.7978e+07	0	1.31542e+07	0	8.37308e+06	0	7.05191e+06	1.06625e+06	4.34384e+06	2596201	0	1.25128e+07	0	4.0862e+07	0	1.51613e+06	0	5.91396e+06	0	2.04011e+07	0	2.76317e+06	0	9.22961e+06	0	2.97411e+07	0	1.95566e+07	0	692426	86628.2	1.14305e+07
0	Cer(d18:0+pO/28:0+O)-H	Cer(d46:0+pO+O)-H	Cer	(d18:0+pO/28:0+O)	(d18:0+pO)	(28:0+O)			738.698	C46 H92 O5 N1	0	0	68230.9	0	0	0	0	0	0	0	0	0	0	0	0	5120.07	0	1.52075e+06	0	0	0	0	0	0	0	0	0	0	0	0	0	0	0	0	0	0			738.698
0	Cer(d20:1+hO/26:0)+HCOO	Cer(d46:1+hO)+HCOO	Cer	(d20:1+hO/26:0)	(d20:1+hO)	(26:0)			766.693	C47 H92 O6 N1	0	0	568734	0	940946	0	577910	0	287647	0	256179	0	3442.91	0	0	0	0	0	0	0	0	0	0	0	0	0	0	0	0	0	0	0	0	0	0	0			766.693
0	Cer(d20:1+hO/26:0)+HCOO	Cer(d46:1+hO)+HCOO	Cer	(d20:1+hO/26:0)	(d20:1+hO)	(26:0)			766.693	C47 H92 O6 N1	0	0	0	0	0	0	0	0	0	0	0	0	0	0	0	0	0	0	0	0	0	0	0	0	0	0	0	0	0	0	0	1.46142e+06	0	0	0	0
0	Cer(d46:1+pO)+HCOO	Cer(d46:1+pO)+HCOO	Cer	(d46:1+pO)	(d46:1+pO)				766.693	C47 H92 O6 N1	0	0	0	0	0	0	0	0	0	0	0	0	0	0	0	0	0	0	0	4456.95	0	1.10838e+06	0	1.63968e+06	0	43252	0	0	0	0	43000.6	0	36942.4	0	0	0
0	Cer(d20:0+pO/27:0)+HCOO	Cer(d47:0+pO)+HCOO	Cer	(d20:0+pO/27:0)	(d20:0+pO)	(27:0)			782.724	C48 H96 O6 N1	0	0	509699	0	1.75677e+06	0	2282.15	0	1.17519e+06	0	253381	0	2593.54	0	0	1.11989e+06	0	2.60048e+06	0	0	0	0	0	0	0	0	0	0	0	0	0	0	0	0	0	0			782.724
0	Cer(d20:0+pO/27:0)+H	Cer(d47:0+pO)+H	Cer	(d20:0+pO/27:0)	(d20:0+pO)	(27:0)			738.733	C47 H96 O4 N1	794986	0	5.66476e+06	0	1.13001e+07	0	1.15155e+06	0	2.14745e+06	0	2.94873e+06	0	1.29485e+06	0	0	12772.2	0	1.1702e+07	0	0	0	0	0	0	0	0	0	189860	0	207828	0	0	0	0	0	0	738.733		738.733
0	Cer(d22:0+pO/25:0)+H	Cer(d47:0+pO)+H	Cer	(d22:0+pO/25:0)	(d22:0+pO)	(25:0)			738.733	C47 H96 O4 N1	0	0	320901	0	2.13044e+06	0	0	0	300412	0	441295	0	0	0	0	988377	0	4.30849e+06	0	916070	0	0	0	319872	0	662245	0	443276	0	1.23971e+07	0	6.89538e+06	0	0	0	83877.1			738.733
0	Cer(d22:0+pO/26:0)+HCOO	Cer(d48:0+pO)+HCOO	Cer	(d22:0+pO/26:0)	(d22:0+pO)	(26:0)			796.74	C49 H98 O6 N1	179759	0	1.27389e+06	0	4.23732e+06	0	2859.34	0	898135	0	742050	0	1990.64	0	0	3749.63	0	1.42606e+06	0	12866.2	0	0	0	0	0	0	0	0	0	0	0	0	0	0	0	0	796.74		796.74
0	Cer(d22:0+pO/26:0)+H	Cer(d48:0+pO)+H	Cer	(d22:0+pO/26:0)	(d22:0+pO)	(26:0)			752.749	C48 H98 O4 N1	638060	0	7.19153e+06	0	1.90401e+07	0	9.00102e+06	0	13975	0	5.25186e+06	0	332857	0	0	17938.7	0	2.03383e+07	0	134875	0	121838	0	0	0	0	0	3326.45	0	0	0	0	0	0	0	0	752.749		752.749
0	Cer(d22:0+pO/26:0)+HCOO	Cer(d48:0+pO)+HCOO	Cer	(d22:0+pO/26:0)	(d22:0+pO)	(26:0)			796.74	C49 H98 O6 N1	0	0	0	0	0	0	0	0	0	0	0	0	0	0	0	0	0	0	0	0	0	0	0	0	0	0	0	0	0	3.73137e+06	0	0	0	0	0	0
0	Cer(d22:0+pO/26:0)+H	Cer(d48:0+pO)+H	Cer	(d22:0+pO/26:0)	(d22:0+pO)	(26:0)			752.749	C48 H98 O4 N1	0	0	0	0	0	0	0	0	0	0	0	0	0	0	0	2.94642e+06	0	155999	0	0	0	0	0	0	0	0	0	433771	0	1.36408e+07	0	181707	0	0	0	59217.3
0	Cer(d24:0+pO/25:0)+H	Cer(d49:0+pO)+H	Cer	(d24:0+pO/25:0)	(d24:0+pO)	(25:0)			766.765	C49 H100 O4 N1	1.00649e+06	44841	2.40247e+06	0	7.97798e+06	0	4.27231e+06	0	2.18282e+06	0	330386	822.902	1.08357e+06	0	0	5919.48	0	351748	0	0	0	0	0	0	0	0	0	474730	0	0	0	0	0	0	0	0	766.765	766.765	766.765
0	Cer(d22:0+pO/28:0)+HCOO	Cer(d50:0+pO)+HCOO	Cer	(d22:0+pO/28:0)	(d22:0+pO)	(28:0)			824.771	C51 H102 O6 N1	0	0	0	0	1.65223e+06	0	387360	0	390898	0	239805	0	0	0	0	0	0	0	0	0	0	0	0	0	0	0	0	0	0	0	0	0	0	0	0	0
0	CerG1(d18:0+pO/16:0)+H-H2O	CerG1(d34:0+pO)+H-H2O	CerG1	(d18:0+pO/16:0)	(d18:0+pO)	(16:0)			700.572	C40 H78 O8 N1	0	89730.9	0	0	0	0	0	0	0	0	0	0	0	0	0	0	0	0	0	362187	0	141784	0	0	0	3.30637e+06	0	0	0	0	0	0	0	587.132	0	0		700.572
0	CerG1(d18:0+pO/16:0)+H-H2O	CerG1(d34:0+pO)+H-H2O	CerG1	(d18:0+pO/16:0)	(d18:0+pO)	(16:0)			700.572	C40 H78 O8 N1	0	0	0	0	0	0	0	31162.9	0	0	0	0	0	0	0	0	0	0	0	0	0	4.60533e+06	0	7.22368e+06	0	0	0	0	0	0	0	0	0	0	0	0
0	CerG1(d18:1/16:0)+H	CerG1(d34:1)+H	CerG1	(d18:1/16:0)	(d18:1)	(16:0)			700.572	C40 H78 O8 N1	0	0	0	0	53481.7	0	0	0	0	0	0	0	0	0	0	0	0	0	0	0	0	0	0	0	0	0	0	285082	0	86069.9	0	4.27931e+06	0	0	0	0
0	CerG1(d18:1/16:0)+H	CerG1(d34:1)+H	CerG1	(d18:1/16:0)	(d18:1)	(16:0)			700.572	C40 H78 O8 N1	0	0	0	0	344205	0	0	0	0	0	0	0	0	0	0	0	0	0	0	0	0	0	0	0	0	0	0	0	0	2.61423e+07	0	0	0	0	0	0
0	CerG1(d18:0+pO/18:0)+H-H2O	CerG1(d36:0+pO)+H-H2O	CerG1	(d18:0+pO/18:0)	(d18:0+pO)	(18:0)			728.603	C42 H82 O8 N1	1.94353e+06	0	7.39473e+07	0	7.4095e+07	0	4.94686e+07	0	2980.27	0	6.1352e+07	0	2832.39	0	0	3586.69	0	1.21706e+08	0	555987	0	3959.95	0	550519	0	0	0	185895	0	0	0	0	0	0	0	0	728.604		728.603
0	CerG1(d18:0+pO/18:0)+H-H2O	CerG1(d36:0+pO)+H-H2O	CerG1	(d18:0+pO/18:0)	(d18:0+pO)	(18:0)			728.603	C42 H82 O8 N1	0	0	0	0	0	0	0	0	0	0	0	0	0	0	0	0	0	245942	0	0	0	0	0	931.573	0	1686.15	0	0	0	2.82107e+08	0	4321.21	0	35562.2	0	0
0	CerG1(d18:0+pO/18:0)+H-H2O	CerG1(d36:0+pO)+H-H2O	CerG1	(d18:0+pO/18:0)	(d18:0+pO)	(18:0)			728.603	C42 H82 O8 N1	0	0	0	0	0	0	0	1919.81	0	29626.4	0	0	0	0	0	0	0	0	0	0	0	177950	0	0	0	0	0	8.83429e+06	0	0	0	0	0	0	0	0
0	CerG1(d18:0+pO/18:0)+H-H2O	CerG1(d36:0+pO)+H-H2O	CerG1	(d18:0+pO/18:0)	(d18:0+pO)	(18:0)			728.603	C42 H82 O8 N1	204861	0	0	0	0	0	0	0	0	0	0	0	0	0	0	0	0	0	0	10107.4	0	1.50648e+06	0	0	0	1.38835e+08	0	0	0	0	0	0	0	0	0	0	728.604
0	CerG1(d18:0+pO/18:0)+H-H2O	CerG1(d36:0+pO)+H-H2O	CerG1	(d18:0+pO/18:0)	(d18:0+pO)	(18:0)			728.603	C42 H82 O8 N1	0	0	0	0	0	0	0	0	0	0	0	0	0	0	0	0	0	0	0	8.08091e+07	0	0	0	0	0	0	0	0	0	0	0	0	0	0	0	0
0	CerG1(d18:1/18:0)+H	CerG1(d36:1)+H	CerG1	(d18:1/18:0)	(d18:1)	(18:0)			728.603	C42 H82 O8 N1	0	0	0	0	0	0	0	0	0	0	0	0	0	0	0	0	0	0	0	0	0	0	0	0	645.31	0	1.1793e+06	0	128405	0	31253.5	0	0	0	0	0
0	CerG1(d18:1/18:0)+H	CerG1(d36:1)+H	CerG1	(d18:1/18:0)	(d18:1)	(18:0)			728.603	C42 H82 O8 N1	0	0	0	0	0	0	0	0	0	0	0	0	0	0	0	0	0	0	2.16642e+07	0	337.954	0	25576.9	0	56029.6	0	0	0	0	0	0	0	0	0	0	0
0	CerG1(d18:1/18:0)+H	CerG1(d36:1)+H	CerG1	(d18:1/18:0)	(d18:1)	(18:0)			728.603	C42 H82 O8 N1	2.1807e+06	0	7.42662e+07	0	7.43395e+07	0	6.82879e+07	0	1.17281e+06	0	6.18439e+07	0	171142	0	0	174554	0	1.28783e+08	0	2.23487e+06	0	1.22996e+06	0	1.99676e+06	0	0	0	994694	0	1.8608e+07	0	757477	0	0	0	0	728.604		728.604
0	CerG1(d18:1/18:0)+H-H2O	CerG1(d36:1)+H-H2O	CerG1	(d18:1/18:0)	(d18:1)	(18:0)			710.593	C42 H80 O7 N1	176268	0	612098	0	0	0	0	0	0	0	0	0	0	0	0	2428.4	0	7.03751e+06	0	0	0	0	0	96174.3	0	0	0	0	0	0	0	0	0	0	0	0	710.593		710.593
0	CerG1(d18:1/18:0)+H	CerG1(d36:1)+H	CerG1	(d18:1/18:0)	(d18:1)	(18:0)			728.603	C42 H82 O8 N1	0	0	0	0	3618.74	0	5260.7	0	2726.82	0	0	0	185.174	0	0	0	0	0	0	0	0	0	0	0	0	0	0	236510	0	0	0	1.20094e+07	0	0	0	285874
0	CerG1(d18:1/18:0)+H	CerG1(d36:1)+H	CerG1	(d18:1/18:0)	(d18:1)	(18:0)			728.603	C42 H82 O8 N1	0	104235	0	0	0	0	0	0	0	0	0	0	0	0	0	0	19219.5	0	0	0	0	2.27971e+08	0	2.69656e+08	0	0	0	0	0	0	0	0	0	29302.4	0	7041.86		728.604
0	CerG1(d18:1/18:0)+H	CerG1(d36:1)+H	CerG1	(d18:1/18:0)	(d18:1)	(18:0)			728.603	C42 H82 O8 N1	0	0	0	0	0	51525.7	0	0	0	0	0	0	0	0	0	0	0	0	0	0	0	0	0	0	0	0	0	0	44397	0	0	0	0	2.37073e+07	0	5852.85
1	CerG1(d18:1/18:0+O)+H	CerG1(d36:1+O)+H	CerG1	(d18:1/18:0+O)	(d18:1)	(18:0+O)			744.598	C42 H82 O9 N1	0	0	0	0	0	0	0	0	0	0	0	0	0	0	0	0	0	0	0	0	0	0	0	0	0	0	0	0	0	0	0	0	0	0	0	0			744.598
0	CerG1(d18:1/18:0+O)+H	CerG1(d36:1+O)+H	CerG1	(d18:1/18:0+O)	(d18:1)	(18:0+O)			744.598	C42 H82 O9 N1	2.28967e+06	0	8.79027e+07	0	7.69974e+07	0	7.01478e+07	52948.6	4413.29	0	7.42811e+07	0	0	0	0	73027.2	0	109736756	0	0	0	0	0	0	0	0	0	0	0	0	0	608731	0	67632.7	0	0	744.598		744.598
0	CerG1(d18:1/18:0+O)+H	CerG1(d36:1+O)+H	CerG1	(d18:1/18:0+O)	(d18:1)	(18:0+O)			744.598	C42 H82 O9 N1	0	0	0	0	0	0	0	0	0	0	0	0	0	0	0	0	0	0	0	5401.74	0	0	0	0	0	0	0	0	0	2.36972e+08	0	529512	0	0	0	0
0	CerG1(d18:1/18:0+O)+H	CerG1(d36:1+O)+H	CerG1	(d18:1/18:0+O)	(d18:1)	(18:0+O)			744.598	C42 H82 O9 N1	0	999.39	0	0	0	0	0	0	0	0	0	0	0	0	45244.7	0	0	0	0	0	0	0	0	0	0	0	0	7.76034e+06	0	1.79452e+07	0	0	0	0	0	0		744.598
0	CerG1(d18:1/18:0+O)+H	CerG1(d36:1+O)+H	CerG1	(d18:1/18:0+O)	(d18:1)	(18:0+O)			744.598	C42 H82 O9 N1	0	0	0	0	0	0	0	0	0	0	0	35381.6	0	0	0	0	0	0	0	0	217.587	5.28324e+06	0	9.69366e+06	0	1.38881e+07	0	0	0	0	0	0	0	0	0	0
0	CerG1(d18:2/18:0+O)+H	CerG1(d36:2+O)+H	CerG1	(d18:2/18:0+O)	(d18:2)	(18:0+O)			742.583	C42 H80 O9 N1	0	0	0	0	2.0323e+06	0	8.88525e+06	0	0	14661.8	2.39481e+06	0	0	0	0	0	0	0	0	0	0	0	0	0	0	0	0	0	0	0	0	0	0	0	0	0
0	CerG1(d18:0+pO/20:0)+H-H2O	CerG1(d38:0+pO)+H-H2O	CerG1	(d18:0+pO/20:0)	(d18:0+pO)	(20:0)			756.635	C44 H86 O8 N1	960135	0	1.30478e+07	0	1.40028e+07	0	1.09073e+07	0	3.25524e+06	0	1.02746e+07	0	217560	0	0	476674	0	2.28427e+07	0	0	0	0	0	0	0	0	0	41211.6	234947	345487	0	230216	0	0	0	0	756.635		756.634
0	CerG1(d18:0+pO/20:0)+H-H2O	CerG1(d38:0+pO)+H-H2O	CerG1	(d18:0+pO/20:0)	(d18:0+pO)	(20:0)			756.635	C44 H86 O8 N1	0	0	0	0	0	0	0	0	0	0	0	0	0	0	0	0	0	0	0	0	0	0	0	0	0	0	0	1868.27	0	7.05201e+07	0	8795.23	0	0	0	0
0	CerG1(d18:0+pO/20:0)+H-H2O	CerG1(d38:0+pO)+H-H2O	CerG1	(d18:0+pO/20:0)	(d18:0+pO)	(20:0)			756.635	C44 H86 O8 N1	0	0	0	0	0	0	0	0	0	0	0	0	0	0	0	0	0	0	0	0	0	0	0	0	0	3.05483e+07	0	0	0	0	0	0	0	0	0	0
0	CerG1(d18:0+pO/20:0)+H-H2O	CerG1(d38:0+pO)+H-H2O	CerG1	(d18:0+pO/20:0)	(d18:0+pO)	(20:0)			756.635	C44 H86 O8 N1	0	0	0	0	0	0	0	0	0	0	0	0	0	0	0	0	0	0	0	2.6418e+07	0	6.27428e+07	0	8.43267e+07	0	331542	0	0	0	0	0	0	0	0	0	0
0	CerG1(d38:0+pO+O)+H-H2O	CerG1(d38:0+pO+O)+H-H2O	CerG1	(d38:0+pO+O)	(d38:0+pO+O)				772.63	C44 H86 O9 N1	0	0	0	0	0	0	0	0	0	0	0	0	0	0	0	0	0	0	5.0499e+06	0	0	0	0	0	44823.9	0	0	0	0	0	0	0	0	0	0	0
0	CerG1(d18:1/20:0+O)+H	CerG1(d38:1+O)+H	CerG1	(d18:1/20:0+O)	(d18:1)	(20:0+O)			772.63	C44 H86 O9 N1	1.47746e+06	0	6.81502e+07	0	7.13365e+07	0	6.1474e+07	0	234459	0	472051	0	0	0	0	142384	0	1.04319e+08	0	0	0	0	0	0	0	0	0	0	0	0	0	1.24136e+06	0	50918.8	0	0	772.63		772.628
0	CerG1(d18:1/20:0+O)+H	CerG1(d38:1+O)+H	CerG1	(d18:1/20:0+O)	(d18:1)	(20:0+O)			772.63	C44 H86 O9 N1	0	0	0	0	0	0	0	0	0	0	0	0	0	0	0	0	0	0	0	0	0	0	0	0	0	0	0	0	0	1.18137e+07	0	8.519e+06	0	0	0	0
0	CerG1(d18:1/20:0+O)+H	CerG1(d38:1+O)+H	CerG1	(d18:1/20:0+O)	(d18:1)	(20:0+O)			772.63	C44 H86 O9 N1	0	0	3.75471e+06	0	3.1873e+06	0	1.15374e+06	0	0	0	2.12795e+06	113126	0	94103.4	0	0	0	359034	0	0	0	696516	0	3.11283e+06	0	0	0	0	0	2.68669e+08	0	0	0	0	0	0			772.63
0	CerG1(d18:1/20:0+O)+H	CerG1(d38:1+O)+H	CerG1	(d18:1/20:0+O)	(d18:1)	(20:0+O)			772.63	C44 H86 O9 N1	0	0	0	0	0	0	0	0	0	0	0	0	0	0	0	0	0	0	0	0	0	0	0	0	0	1.35748e+06	58386.3	1.75999e+07	0	0	0	0	0	0	0	0
0	CerG1(d18:1/20:0+O)+H	CerG1(d38:1+O)+H	CerG1	(d18:1/20:0+O)	(d18:1)	(20:0+O)			772.63	C44 H86 O9 N1	0	106523	0	0	0	0	0	0	0	0	0	0	0	0	0	0	0	0	0	0	0	1.77809e+06	0	2.31196e+07	0	1.15989e+08	0	0	0	0	0	0	0	0	0	0		772.63
0	CerG1(d18:1/20:0+O)+H	CerG1(d38:1+O)+H	CerG1	(d18:1/20:0+O)	(d18:1)	(20:0+O)			772.63	C44 H86 O9 N1	0	0	0	0	0	0	0	0	0	0	0	91338.7	0	0	0	0	0	0	0	9.83654e+07	0	2.59703e+08	0	2.81659e+08	0	3.75831e+06	0	0	0	0	0	0	0	0	0	341697
0	CerG1(d38:6+pO)-H	CerG1(d38:6+pO)-H	CerG1	(d38:6+pO)	(d38:6+pO)				760.537	C44 H74 O9 N1	0	0	0	0	0	0	0	0	0	0	0	0	0	0	0	0	0	0	0	26199.8	0	5.75905e+06	0	7.06761e+06	0	452073	0	17200.8	0	0	0	0	0	0	0	0
0	CerG1(d18:1/21:0+O)+H	CerG1(d39:1+O)+H	CerG1	(d18:1/21:0+O)	(d18:1)	(21:0+O)			786.645	C45 H88 O9 N1	0	0	1.09515e+07	0	1.21393e+07	0	9.38658e+06	0	0	0	9.25384e+06	0	0	25073.1	0	0	0	1.81665e+07	0	0	0	0	0	0	0	0	0	0	0	3.11394e+07	0	3808.69	0	0	0	0			786.644
0	CerG1(d18:1/21:0+O)+H	CerG1(d39:1+O)+H	CerG1	(d18:1/21:0+O)	(d18:1)	(21:0+O)			786.645	C45 H88 O9 N1	0	0	2.98124e+06	0	250882	0	0	0	0	0	0	0	0	0	0	0	0	3.28327e+07	0	0	0	0	0	0	0	0	0	10654.8	0	5.31107e+07	0	0	0	0	0	0			786.645
0	CerG1(d18:0/22:0)+H	CerG1(d40:0)+H	CerG1	(d18:0/22:0)	(d18:0)	(22:0)			786.682	C46 H92 O8 N1	4538.7	0	1.86721e+07	0	2.16551e+07	0	1.84908e+07	0	0	0	1.88522e+07	0	0	0	0	0	0	1.87716e+07	0	0	0	0	0	0	0	0	0	0	0	0	0	0	0	0	0	0	786.682		786.68
0	CerG1(d18:0/22:0)+H	CerG1(d40:0)+H	CerG1	(d18:0/22:0)	(d18:0)	(22:0)			786.682	C46 H92 O8 N1	0	0	0	0	0	0	0	0	0	0	0	0	0	0	0	0	0	0	0	0	0	0	0	0	0	0	0	0	0	8.93887e+07	0	0	0	0	0	0
0	CerG1(d18:0/22:0)+H	CerG1(d40:0)+H	CerG1	(d18:0/22:0)	(d18:0)	(22:0)			786.682	C46 H92 O8 N1	0	0	0	0	0	0	0	0	0	0	0	0	0	0	0	0	0	0	0	0	0	5.55227e+07	0	1.0111e+08	0	0	0	0	0	0	0	0	0	0	0	345727
0	CerG1(d18:0/22:0+O)+H	CerG1(d40:0+O)+H	CerG1	(d18:0/22:0+O)	(d18:0)	(22:0+O)			802.677	C46 H92 O9 N1	0	7.86263e+06	0	1.78512e+06	0	54738.2	0	28953.7	0	0	0	0	0	0	314772	0	1.12872e+06	0	0	0	0	0	0	0	0	0	0	0	0	0	0	0	0	0	0	0		802.675
0	CerG1(d18:0/22:0+O)+H	CerG1(d40:0+O)+H	CerG1	(d18:0/22:0+O)	(d18:0)	(22:0+O)			802.677	C46 H92 O9 N1	2.75764e+06	0	1.04857e+08	0	1.0628e+08	0	9.36321e+07	0	764406	0	9.79565e+07	0	191453	0	0	354679	0	1.59172e+08	0	0	0	0	0	0	0	0	0	0	0	3.71163e+06	0	0	0	0	0	0	802.677		802.676
0	CerG1(d18:0/22:0+O)+H	CerG1(d40:0+O)+H	CerG1	(d18:0/22:0+O)	(d18:0)	(22:0+O)			802.677	C46 H92 O9 N1	0	0	0	0	126506	0	0	0	0	0	0	0	0	0	0	0	0	0	0	0	0	0	0	0	0	0	0	0	0	4.26308e+08	1236.87	2352.57	0	0	0	0
1	CerG1(d18:0+pO/22:0)+H-H2O	CerG1(d40:0+pO)+H-H2O	CerG1	(d18:0+pO/22:0)	(d18:0+pO)	(22:0)			784.666	C46 H90 O8 N1	0	1.65846e+06	0	2.32892e+06	0	0	0	0	0	0	0	0	0	0	847890	0	6254.31	0	0	0	0	0	0	0	0	0	80669.5	0	0	0	0	0	0	0	0	0		784.664
1	CerG1(d18:0+pO/22:0)+H-H2O	CerG1(d40:0+pO)+H-H2O	CerG1	(d18:0+pO/22:0)	(d18:0+pO)	(22:0)			784.666	C46 H90 O8 N1	3.23866e+06	0	1.00697e+08	0	504465	0	3.29005e+07	0	2.85615e+06	0	8.77149e+07	0	670691	0	0	10792.1	0	2.1809e+08	0	0	0	0	0	0	0	0	0	0	0	0	0	1.20748e+06	0	0	0	0	784.666		784.666
0	CerG1(d18:0+pO/22:0)+H-H2O	CerG1(d40:0+pO)+H-H2O	CerG1	(d18:0+pO/22:0)	(d18:0+pO)	(22:0)			784.666	C46 H90 O8 N1	0	0	0	0	0	0	0	0	0	0	0	0	0	0	0	0	0	170598	0	0	0	0	0	0	0	0	0	0	0	1.08116e+06	0	2.32393e+07	0	0	0	0
0	CerG1(d18:0+pO/22:0)+H-H2O	CerG1(d40:0+pO)+H-H2O	CerG1	(d18:0+pO/22:0)	(d18:0+pO)	(22:0)			784.666	C46 H90 O8 N1	0	0	0	0	0	0	0	0	0	0	0	0	0	0	0	0	0	0	0	13837.1	0	2.64389e+07	0	2.80375e+07	0	2.13722e+08	0	0	0	0	0	0	0	0	0	0
0	CerG1(d40:0+pO)-H	CerG1(d40:0+pO)-H	CerG1	(d40:0+pO)	(d40:0+pO)				800.662	C46 H90 O9 N1	0	0	0	0	0	0	0	0	0	0	0	0	0	0	0	0	0	0	0	0	0	1.03378e+06	0	5.12392e+06	0	27583.8	0	0	0	0	0	0	0	0	0	0
0	CerG1(d40:1)+H	CerG1(d40:1)+H	CerG1	(d40:1)	(d40:1)				784.666	C46 H90 O8 N1	0	2.42021e+06	0	2.15963e+06	0	0	0	0	0	0	0	0	0	0	53265	0	4352.97	0	0	0	0	0	0	0	0	0	0	0	0	0	0	0	0	0	0	0		784.666
0	CerG1(d18:1/22:0)+H	CerG1(d40:1)+H	CerG1	(d18:1/22:0)	(d18:1)	(22:0)			784.666	C46 H90 O8 N1	0	0	0	0	0	0	0	0	0	0	0	0	0	0	0	0	0	0	0	0	0	0	216451	0	0	0	3.41375e+06	0	0	0	2.63935e+06	0	0	0	0	0
0	CerG1(d18:1/22:0)+H	CerG1(d40:1)+H	CerG1	(d18:1/22:0)	(d18:1)	(22:0)			784.666	C46 H90 O8 N1	0	0	0	0	0	0	0	0	0	0	0	0	0	0	0	0	0	0	0	0	0	0	0	0	0	0	0	1.90513e+07	0	0	0	0	0	0	0	0
0	CerG1(d18:1/22:0+O)+H	CerG1(d40:1+O)+H	CerG1	(d18:1/22:0+O)	(d18:1)	(22:0+O)			800.661	C46 H90 O9 N1	0	1.4513e+07	0	2.73742e+07	0	0	0	0	0	0	0	0	0	0	329246	0	226557	0	0	39183.9	0	0	0	0	0	0	0	0	0	0	0	0	0	0	0	0		800.66
0	CerG1(d18:1/22:0+O)+H	CerG1(d40:1+O)+H	CerG1	(d18:1/22:0+O)	(d18:1)	(22:0+O)			800.661	C46 H90 O9 N1	0	0	0	49563.9	0	0	305068	0	0	0	0	0	0	0	0	0	0	0	0	0	0	50252.1	0	0	0	0	5.09772e+07	0	1.44205e+06	0	7.81227e+06	0	0	0	0	0
0	CerG1(d18:1/22:0+O)+H	CerG1(d40:1+O)+H	CerG1	(d18:1/22:0+O)	(d18:1)	(22:0+O)			800.661	C46 H90 O9 N1	0	0	0	0	0	0	0	0	0	0	0	0	0	0	0	0	0	0	1.19888e+06	0	3153.14	0	0	0	413249	0	0	0	0	0	0	0	0	0	3.93321e+06	0
0	CerG1(d18:1/22:0+O)+H	CerG1(d40:1+O)+H	CerG1	(d18:1/22:0+O)	(d18:1)	(22:0+O)			800.661	C46 H90 O9 N1	2.20139e+07	0	1.20106e+09	0	1.07664e+09	0	9.32585e+08	0	12749.6	0	9.37482e+08	0	4.30908e+06	0	0	206002	0	1.46705e+09	0	0	0	0	0	0	0	0	0	1745.25	0	0	0	2.28332e+06	0	0	0	0	800.661		800.66
0	CerG1(d18:1/22:0+O)+H	CerG1(d40:1+O)+H	CerG1	(d18:1/22:0+O)	(d18:1)	(22:0+O)			800.661	C46 H90 O9 N1	0	0	1.36091e+06	81271.7	383833	0	1.32818e+06	0	0	0	884593	0	0	0	0	0	0	1.37363e+06	0	0	0	0	0	0	0	0	0	0	0	7.27645e+06	0	3.19642e+08	0	0	0	0			800.661
0	CerG1(d18:1/22:0+O)+H	CerG1(d40:1+O)+H	CerG1	(d18:1/22:0+O)	(d18:1)	(22:0+O)			800.661	C46 H90 O9 N1	0	0	0	0	0	0	0	0	0	0	0	0	0	0	0	0	0	0	0	0	0	0	0	0	0	0	0	1.84728e+08	0	0	0	0	0	0	0	0
1	CerG1(d18:1/22:0+O)+H	CerG1(d40:1+O)+H	CerG1	(d18:1/22:0+O)	(d18:1)	(22:0+O)			800.661	C46 H90 O9 N1	0	0	0	0	0	0	0	0	0	0	0	0	0	0	0	0	0	0	0	2.01243e+07	0	1.90569e+09	0	2.44347e+09	0	1.29069e+09	0	0	0	0	0	0	0	0	0	0
0	CerG1(d18:1/22:0+O)+H	CerG1(d40:1+O)+H	CerG1	(d18:1/22:0+O)	(d18:1)	(22:0+O)			800.661	C46 H90 O9 N1	0	0	107198	89781.3	104981	0	64360.4	0	0	0	231942	0	0	0	0	0	0	244294	0	9.0939e+08	0	3.1861e+06	0	731780	0	0	0	0	0	149090	0	0	0	0	0	8.65944e+07			800.661
1	CerG1(d18:0+pO/22:1)+H-H2O	CerG1(d40:1+pO)+H-H2O	CerG1	(d18:0+pO/22:1)	(d18:0+pO)	(22:1)			782.65	C46 H88 O8 N1	1.00801e+06	0	4.872e+07	0	4.9175e+07	0	3.75695e+07	0	1917.73	0	4.88436e+07	0	0	0	0	0	0	7.36624e+07	0	0	0	0	0	0	0	0	0	0	0	0	0	2.67917e+06	0	0	0	0	782.65		782.649
1	CerG1(d40:1+pO)-H	CerG1(d40:1+pO)-H	CerG1	(d18:0+pO/22:1)	(d18:0+pO)	(22:1)			798.646	C46 H88 O9 N1	362434	0	1.46671e+07	0	1.43979e+07	0	9.88532e+06	0	122158	0	1.49637e+07	0	1506.35	0	0	152874	0	1.65938e+07	0	0	0	0	0	0	0	0	0	0	0	0	0	0	0	53822.6	0	0	798.646		798.643
1	CerG1(d18:0+pO/22:1)+H-H2O	CerG1(d40:1+pO)+H-H2O	CerG1	(d18:0+pO/22:1)	(d18:0+pO)	(22:1)			782.65	C46 H88 O8 N1	0	0	0	0	0	0	0	0	0	0	0	0	0	0	0	0	0	0	0	0	0	0	0	0	0	0	0	0	0	1.51638e+08	0	8.03736e+06	0	0	0	0
1	CerG1(d40:1+pO)-H	CerG1(d40:1+pO)-H	CerG1	(d18:0+pO/22:1)	(d18:0+pO)	(22:1)			798.646	C46 H88 O9 N1	0	0	477816	0	525049	0	411058	0	0	0	109741	0	0	0	0	0	0	797987	0	0	0	0	0	0	0	0	0	0	0	3.7299e+07	0	7.26329e+06	0	0	0	0			798.646
0	CerG1(d18:0+pO/22:1)+H-H2O	CerG1(d40:1+pO)+H-H2O	CerG1	(d18:0+pO/22:1)	(d18:0+pO)	(22:1)			782.65	C46 H88 O8 N1	0	0	0	0	0	0	0	0	0	0	0	0	60094.8	0	0	0	0	0	0	1.8678e+07	0	1.08402e+08	0	1.17624e+08	0	6.54082e+07	0	0	0	0	0	0	0	0	163062	0
0	CerG1(d40:1+pO)-H	CerG1(d40:1+pO)-H	CerG1	(d18:0+pO/22:1)	(d18:0+pO)	(22:1)			798.646	C46 H88 O9 N1	0	0	0	0	0	0	0	0	0	0	0	0	0	0	0	0	0	0	0	0	0	1.4393e+07	0	2.28026e+07	0	826.001	0	0	0	0	0	0	0	0	0	0
1	CerG1(d18:0+pO/22:1)+H-H2O	CerG1(d40:1+pO)+H-H2O	CerG1	(d18:0+pO/22:1)	(d18:0+pO)	(22:1)			782.65	C46 H88 O8 N1	0	0	0	0	0	0	0	0	0	0	0	0	0	0	0	0	0	0	0	3.84572e+07	0	0	0	0	0	0	0	0	0	0	0	0	0	0	94610.4	7839.02
1	CerG1(d40:1+pO)-H	CerG1(d40:1+pO)-H	CerG1	(d18:0+pO/22:1)	(d18:0+pO)	(22:1)			798.646	C46 H88 O9 N1	0	0	0	0	0	0	0	0	0	0	0	0	0	0	0	0	0	0	30589.4	6.3602e+06	0	747529	0	1.09521e+06	0	44914.7	0	0	0	0	0	0	0	0	0	1.47236e+06
0	CerG1(d18:1/22:1)+H	CerG1(d40:2)+H	CerG1	(d18:1/22:1)	(d18:1)	(22:1)			782.65	C46 H88 O8 N1	198571	0	2.89125e+07	0	3.31806e+07	0	2.67564e+07	0	0	0	2.23936e+07	0	0	0	0	0	0	4.60689e+07	0	0	0	0	0	0	0	0	0	0	0	0	0	0	0	0	0	0	782.65		782.65
0	CerG1(d18:1/22:1)+H	CerG1(d40:2)+H	CerG1	(d18:1/22:1)	(d18:1)	(22:1)			782.65	C46 H88 O8 N1	0	0	0	0	0	0	0	0	0	0	0	0	0	0	0	0	0	0	0	0	0	0	0	0	0	0	0	0	0	1.22923e+08	0	2734.99	0	0	0	0
0	CerG1(d18:1/22:1)+H	CerG1(d40:2)+H	CerG1	(d18:1/22:1)	(d18:1)	(22:1)			782.65	C46 H88 O8 N1	0	0	0	0	0	0	0	0	0	0	0	0	0	0	0	0	0	0	0	0	0	6818.55	0	0	0	4.14011e+07	0	0	0	0	0	0	0	0	0	0
0	CerG1(d18:1/22:1)+H	CerG1(d40:2)+H	CerG1	(d18:1/22:1)	(d18:1)	(22:1)			782.65	C46 H88 O8 N1	0	0	0	0	0	0	0	0	0	0	0	0	0	0	0	0	0	0	0	0	0	1.01235e+08	0	1.09661e+08	0	3.96635e+07	0	0	0	0	0	0	0	0	82469.5	0
0	CerG1(d18:2/22:0+O)+H	CerG1(d40:2+O)+H	CerG1	(d18:2/22:0+O)	(d18:2)	(22:0+O)			798.645	C46 H88 O9 N1	166578	0	1.88181e+07	0	2.3522e+07	0	2.01077e+07	0	0	0	1.71935e+07	0	0	0	0	0	0	2.95628e+07	0	0	0	0	0	0	17056.1	0	0	0	0	0	0	0	0	0	0	0	798.645		798.644
0	CerG1(d18:2/22:0+O)+H	CerG1(d40:2+O)+H	CerG1	(d18:2/22:0+O)	(d18:2)	(22:0+O)			798.645	C46 H88 O9 N1	0	0	2.09478e+06	0	2.04777e+06	0	7671.97	0	0	0	304365	0	0	0	0	0	0	123045	0	0	0	0	0	0	0	0	0	0	0	9.41808e+07	0	0	0	0	0	0			798.645
0	CerG1(d18:2/22:0+O)+H	CerG1(d40:2+O)+H	CerG1	(d18:2/22:0+O)	(d18:2)	(22:0+O)			798.645	C46 H88 O9 N1	0	0	0	0	0	0	0	0	0	0	0	0	0	0	0	0	0	0	0	0	0	0	0	0	0	9.63426e+07	0	0	0	0	0	0	0	0	0	2.41179e+06
0	CerG1(d18:0/23:0+O)+H	CerG1(d41:0+O)+H	CerG1	(d18:0/23:0+O)	(d18:0)	(23:0+O)			816.692	C47 H94 O9 N1	0	0	0	42561.3	0	0	0	0	0	0	0	0	0	0	0	0	0	0	0	6.14645e+06	0	5.07577e+07	0	2.0804e+07	0	4.69514e+07	0	0	0	0	0	0	0	0	0	0
1	CerG1(d18:0/23:0+O)+H	CerG1(d41:0+O)+H	CerG1	(d18:0/23:0+O)	(d18:0)	(23:0+O)			816.692	C47 H94 O9 N1	0	0	0	0	0	0	0	0	0	0	0	0	0	0	0	0	0	0	0	1.15658e+07	0	6.34195e+07	0	6.61077e+07	0	0	0	0	0	0	0	0	0	0	0	1.57165e+06
0	CerG1(d18:0+pO/23:0)+H-H2O	CerG1(d41:0+pO)+H-H2O	CerG1	(d18:0+pO/23:0)	(d18:0+pO)	(23:0)			798.682	C47 H92 O8 N1	310314	0	5.76151e+07	0	4.98107e+07	0	5.14192e+07	0	108261	0	4.81247e+07	0	13648.7	0	0	4999.63	0	1.90611e+07	0	0	0	0	0	0	0	0	0	0	0	0	0	9012.05	0	0	0	0	798.682		798.682
1	CerG1(d18:0+pO/23:0)+H-H2O	CerG1(d41:0+pO)+H-H2O	CerG1	(d18:0+pO/23:0)	(d18:0+pO)	(23:0)			798.682	C47 H92 O8 N1	0	0	0	0	0	0	0	0	0	0	0	0	0	0	0	0	0	0	0	5.05836e+07	0	1.33752e+08	0	1.5671e+08	0	0	0	0	0	0	0	0	0	0	0	2.12708e+06
0	CerG1(d18:1/23:0)+H	CerG1(d41:1)+H	CerG1	(d18:1/23:0)	(d18:1)	(23:0)			798.682	C47 H92 O8 N1	410694	0	4.08457e+06	0	832358	0	290295	0	0	0	0	0	115462	0	0	70196.3	0	1.27967e+08	0	0	0	0	0	0	0	0	0	0	0	276809	0	758296	0	0	0	0	798.682		798.682
0	CerG1(d18:1/23:0)+H	CerG1(d41:1)+H	CerG1	(d18:1/23:0)	(d18:1)	(23:0)			798.682	C47 H92 O8 N1	0	0	0	0	0	0	0	0	0	0	0	0	0	0	0	0	0	0	0	321939	0	7.62159e+06	0	7.94409e+06	0	8.48162e+07	0	0	0	0	0	0	0	0	0	0
0	CerG1(d18:1/23:0+O)+H	CerG1(d41:1+O)+H	CerG1	(d18:1/23:0+O)	(d18:1)	(23:0+O)			814.677	C47 H92 O9 N1	0	4.15442e+06	0	0	0	0	0	0	0	0	0	0	0	0	3.29591e+06	0	161454	0	0	0	0	0	0	0	0	0	0	0	0	0	0	0	0	0	0	0
1	CerG1(d18:1/23:0+O)+H	CerG1(d41:1+O)+H	CerG1	(d18:1/23:0+O)	(d18:1)	(23:0+O)			814.677	C47 H92 O9 N1	6.77748e+06	0	2.80821e+08	0	2.9203e+08	0	2.41726e+08	0	3.28648e+06	0	2.37974e+08	0	2.05591e+06	0	0	13827.9	0	5.14398e+08	0	0	0	0	0	0	0	0	0	0	0	5501.62	0	2.62536e+06	0	0	0	0	814.676		814.675
0	CerG1(d18:1/23:0+O)+H	CerG1(d41:1+O)+H	CerG1	(d18:1/23:0+O)	(d18:1)	(23:0+O)			814.677	C47 H92 O9 N1	0	0	3.90089e+06	0	1.65836e+06	0	807032	0	0	0	1.91e+06	0	0	0	0	0	0	6.36397e+06	0	0	0	0	0	0	0	0	0	0	0	1.05244e+09	0	4.98721e+07	0	0	0	0			814.677
1	CerG1(d41:1+hO)-H	CerG1(d41:1+hO)-H	CerG1	(d41:1+hO)	(d41:1+hO)				812.662	C47 H90 O9 N1	6449.13	0	11599.8	0	5.09689e+06	0	4.40777e+06	0	0	0	4.25944e+06	0	0	0	0	0	0	0	0	0	0	0	0	0	0	0	0	0	0	0	0	0	0	0	0	0	812.662		812.662
0	CerG1(d18:0+pO/23:1)+H-H2O	CerG1(d41:1+pO)+H-H2O	CerG1	(d18:0+pO/23:1)	(d18:0+pO)	(23:1)			796.666	C47 H90 O8 N1	446237	0	1.3563e+07	0	1.22628e+07	0	1.01479e+07	0	0	0	1.30096e+07	0	3717.42	0	0	0	0	76439.1	0	0	0	0	0	0	0	0	17640.1	0	0	0	0	2505.74	0	0	0	0	796.666		796.666
0	CerG1(d41:1+pO)-H	CerG1(d41:1+pO)-H	CerG1	(d18:0+pO/23:1)	(d18:0+pO)	(23:1)			812.662	C47 H90 O9 N1	175872	0	4.94098e+06	0	5.41245e+06	0	1.44728e+06	0	0	0	3.08738e+06	0	0	0	0	0	0	6.8161e+06	0	0	0	1011.3	0	0	0	0	0	0	0	0	0	0	0	0	0	0	812.662		812.657
1	CerG1(d18:0+pO/23:1)+H-H2O	CerG1(d41:1+pO)+H-H2O	CerG1	(d18:0+pO/23:1)	(d18:0+pO)	(23:1)			796.666	C47 H90 O8 N1	0	0	0	0	0	0	0	0	0	0	0	0	0	0	0	0	0	0	0	0	0	0	0	0	0	0	0	0	0	5.09171e+07	0	0	0	0	0	0
1	CerG1(d41:1+pO)-H	CerG1(d41:1+pO)-H	CerG1	(d18:0+pO/23:1)	(d18:0+pO)	(23:1)			812.662	C47 H90 O9 N1	0	0	0	0	0	0	0	0	0	0	0	0	0	0	0	0	0	0	0	0	0	0	0	0	0	0	0	0	0	1.41839e+07	0	0	0	0	0	0
0	CerG1(d18:0+pO/23:1)+H-H2O	CerG1(d41:1+pO)+H-H2O	CerG1	(d18:0+pO/23:1)	(d18:0+pO)	(23:1)			796.666	C47 H90 O8 N1	0	0	0	0	0	0	0	0	0	977.31	0	0	0	0	0	0	0	0	0	0	0	3.53652e+07	0	5.8659e+07	0	1.05869e+07	0	0	0	0	0	0	0	0	0	0
0	CerG1(d41:1+pO)-H	CerG1(d41:1+pO)-H	CerG1	(d18:0+pO/23:1)	(d18:0+pO)	(23:1)			812.662	C47 H90 O9 N1	0	0	0	0	0	0	0	0	0	0	0	0	0	0	0	0	0	0	0	0	0	8.75213e+06	0	1.25891e+07	0	7653.25	0	0	0	0	0	0	0	0	0	0
0	CerG1(d18:0+pO/23:1)+H-H2O	CerG1(d41:1+pO)+H-H2O	CerG1	(d18:0+pO/23:1)	(d18:0+pO)	(23:1)			796.666	C47 H90 O8 N1	0	0	0	0	0	0	0	0	0	0	0	0	0	0	0	0	0	0	0	1.17081e+07	0	0	0	0	0	0	0	0	0	0	0	0	0	0	0	0
0	CerG1(d41:1+pO)-H	CerG1(d41:1+pO)-H	CerG1	(d18:0+pO/23:1)	(d18:0+pO)	(23:1)			812.662	C47 H90 O9 N1	0	0	0	0	0	0	0	0	0	0	0	0	0	0	0	0	0	0	0	3.38688e+06	0	160588	0	688100	0	0	0	0	0	0	0	0	0	0	0	0
0	CerG1(d18:1/23:1)+H	CerG1(d41:2)+H	CerG1	(d18:1/23:1)	(d18:1)	(23:1)			796.666	C47 H90 O8 N1	0	0	1.0127e+07	0	1.23488e+07	0	8.06824e+06	0	0	0	6.74285e+06	0	0	0	0	0	0	1.68072e+07	0	0	0	0	0	0	0	0	0	0	0	0	0	0	0	0	0	0			796.664
0	CerG1(d18:1/23:1)+H	CerG1(d41:2)+H	CerG1	(d18:1/23:1)	(d18:1)	(23:1)			796.666	C47 H90 O8 N1	0	0	0	0	0	0	0	0	0	37181.1	0	0	0	0	0	0	0	0	0	0	0	0	0	0	0	0	0	0	0	4.09634e+07	0	11554.7	0	0	0	0
0	CerG1(d18:2/23:0+O)+H	CerG1(d41:2+O)+H	CerG1	(d18:2/23:0+O)	(d18:2)	(23:0+O)			812.661	C47 H90 O9 N1	0	0	8138.5	0	519741	0	2.43522e+06	0	0	0	591231	0	0	0	0	0	0	1.83425e+07	0	0	0	0	0	0	0	0	0	0	0	0	0	6415.84	0	0	0	0			812.661
0	CerG1(d18:2/23:0+O)+H	CerG1(d41:2+O)+H	CerG1	(d18:2/23:0+O)	(d18:2)	(23:0+O)			812.661	C47 H90 O9 N1	602815	0	4.34825e+07	0	2.75497e+07	0	3.60041e+07	0	7340.78	0	4.15574e+07	0	2234.35	0	0	731735	0	7.42228e+07	0	0	0	0	0	0	0	0	0	0	0	3.95085e+07	0	0	0	0	0	0	812.661		812.661
0	CerG1(d41:4+pO)-H	CerG1(d41:4+pO)-H	CerG1	(d41:4+pO)	(d41:4+pO)				806.615	C47 H84 O9 N1	0	0	0	0	0	0	0	0	0	0	0	0	0	0	0	0	0	0	0	6.14941e+06	0	4.12738e+06	0	5.9697e+06	0	0	0	0	0	0	0	0	0	0	0	1.31337e+06
0	CerG1(d41:6+pO)-H	CerG1(d41:6+pO)-H	CerG1	(d41:6+pO)	(d41:6+pO)				802.584	C47 H80 O9 N1	0	0	0	0	288930	0	2.13731e+06	0	0	0	485356	0	0	0	0	0	0	0	0	0	0	0	0	0	0	0	0	0	0	0	0	0	0	0	0	0
0	CerG1(d18:0/24:0)+H	CerG1(d42:0)+H	CerG1	(d18:0/24:0)	(d18:0)	(24:0)			814.713	C48 H96 O8 N1	461696	0	2.14355e+07	0	2.31862e+07	0	2.0053e+07	0	315805	0	2.06238e+07	0	0	0	0	172228	0	4.62659e+07	0	0	0	0	0	0	0	0	0	0	0	936.862	0	2456.58	0	0	0	0	814.713		814.712
0	CerG1(d18:0/24:0)+H	CerG1(d42:0)+H	CerG1	(d18:0/24:0)	(d18:0)	(24:0)			814.713	C48 H96 O8 N1	0	0	0	0	0	0	0	0	0	0	0	0	0	0	0	0	0	0	0	0	0	0	0	0	0	0	0	0	0	1.45826e+08	0	0	0	0	0	0
0	CerG1(d18:0/24:0+O)+H	CerG1(d42:0+O)+H	CerG1	(d18:0/24:0+O)	(d18:0)	(24:0+O)			830.708	C48 H96 O9 N1	0	0	0	0	0	0	0	0	0	0	0	0	0	0	0	0	0	0	0	0	0	0	0	0	0	0	0	0	0	2.39275e+08	0	0	0	0	0	0
0	CerG1(d18:0+pO/24:0)+H-H2O	CerG1(d42:0+pO)+H-H2O	CerG1	(d18:0+pO/24:0)	(d18:0+pO)	(24:0)			812.697	C48 H94 O8 N1	7.73359e+06	0	3.84954e+08	0	3.47162e+08	0	1.35322e+08	0	5.3838e+06	0	2.9015e+08	0	1.75682e+06	0	0	88557.5	0	7.91246e+07	0	0	0	0	0	0	0	0	0	0	0	27879.1	0	3.07129e+06	0	0	0	0	812.697		812.697
0	CerG1(d18:0+pO/24:0)+H-H2O	CerG1(d42:0+pO)+H-H2O	CerG1	(d18:0+pO/24:0)	(d18:0+pO)	(24:0)			812.697	C48 H94 O8 N1	0	0	0	0	0	0	0	0	0	0	0	0	0	0	0	0	0	9074.19	0	0	0	0	0	0	0	0	0	0	0	1.7351e+08	0	7.83616e+07	0	0	0	0
0	CerG1(d18:0+pO/24:0)+H-H2O	CerG1(d42:0+pO)+H-H2O	CerG1	(d18:0+pO/24:0)	(d18:0+pO)	(24:0)			812.697	C48 H94 O8 N1	28507.5	0	0	0	0	0	0	0	0	0	102463	0	0	0	0	0	0	0	0	3.45516e+08	0	9.94191e+08	0	1.34669e+09	0	448136	0	0	0	0	0	0	0	0	0	447982	812.697
0	CerG1(d42:1)+H	CerG1(d42:1)+H	CerG1	(d42:1)	(d42:1)				812.697	C48 H94 O8 N1	0	1.83217e+06	0	507467	0	858.94	0	6.43513e+06	0	0	0	0	0	0	0	0	201341	0	0	0	0	0	0	0	0	0	0	0	0	0	0	0	0	0	0	0		812.697
0	CerG1(d18:1/24:0)+H	CerG1(d42:1)+H	CerG1	(d18:1/24:0)	(d18:1)	(24:0)			812.697	C48 H94 O8 N1	0	9.87211e+06	0	6144.32	0	0	0	0	0	0	0	0	0	0	1.19306e+07	0	864862	0	0	0	0	0	0	0	0	0	0	0	0	0	0	0	0	0	0	0		812.696
0	CerG1(d18:1/24:0)+H	CerG1(d42:1)+H	CerG1	(d18:1/24:0)	(d18:1)	(24:0)			812.697	C48 H94 O8 N1	0	0	0	0	0	0	0	0	0	0	0	0	0	0	0	0	0	0	157643	0	1343.87	0	877.691	0	0	0	1.31394e+07	0	0	0	21017.7	0	0	0	0	0
0	CerG1(d42:1)+H	CerG1(d42:1)+H	CerG1	(d42:1)	(d42:1)				812.697	C48 H94 O8 N1	0	0	0	0	0	0	0	0	0	0	0	0	0	0	0	0	0	0	438645	0	6842.58	0	0	0	134048	0	1155.72	0	0	0	0	0	0	0	918376	0
0	CerG1(d18:1/24:0)+H	CerG1(d42:1)+H	CerG1	(d18:1/24:0)	(d18:1)	(24:0)			812.697	C48 H94 O8 N1	2.69573e+06	0	1.22578e+08	0	1.30684e+08	0	2.528e+07	0	801360	0	1.03664e+08	0	438966	0	0	0	0	1.88599e+07	0	0	0	0	0	0	0	0	0	0	0	0	0	0	0	0	0	0	812.697		812.697
0	CerG1(d18:1/24:0)+H	CerG1(d42:1)+H	CerG1	(d18:1/24:0)	(d18:1)	(24:0)			812.697	C48 H94 O8 N1	7.94008e+06	0	3.9656e+08	0	3.55163e+08	0	1.35111e+08	0	5.65078e+06	0	2.91375e+08	0	2.91883e+06	0	0	4.00038e+06	0	3.57845e+06	0	0	0	0	0	0	0	0	0	0	0	18382.3	0	2.60793e+07	0	0	0	0	812.697		812.697
0	CerG1(d18:1/24:0)+H-H2O	CerG1(d42:1)+H-H2O	CerG1	(d18:1/24:0)	(d18:1)	(24:0)			794.687	C48 H92 O7 N1	525518	0	1.25486e+07	0	1.30367e+07	0	1.2257e+07	0	7252.48	0	1.48322e+07	0	0	0	0	0	0	2.85274e+07	0	0	0	0	0	0	0	0	0	0	0	23169.2	0	0	0	0	0	0	794.687		794.683
0	CerG1(d42:1)-H	CerG1(d42:1)-H	CerG1	(d18:1/24:0)	(d18:1)	(24:0)			810.683	C48 H92 O8 N1	0	0	591185	0	56465.9	0	0	0	0	0	188016	0	0	0	0	0	0	7390.59	0	0	0	0	0	0	0	0	0	0	0	0	0	0	0	0	0	0			810.683
0	CerG1(d18:0/24:1)+H	CerG1(d42:1)+H	CerG1	(d18:0/24:1)	(d18:0)	(24:1)			812.697	C48 H94 O8 N1	0	0	319402	0	5931.51	0	392.714	0	0	0	0	0	0	0	0	0	0	9473.33	0	0	0	0	0	0	0	0	0	0	0	9.81298e+07	0	7.8099e+07	0	0	0	0			812.697
0	CerG1(d18:1/24:0)+H	CerG1(d42:1)+H	CerG1	(d18:1/24:0)	(d18:1)	(24:0)			812.697	C48 H94 O8 N1	0	0	0	0	0	0	0	0	0	0	0	0	0	0	0	0	0	0	0	0	0	0	0	0	0	914129	0	6.35712e+07	0	0	0	0	0	0	0	0
0	CerG1(d18:1/24:0)+H	CerG1(d42:1)+H	CerG1	(d18:1/24:0)	(d18:1)	(24:0)			812.697	C48 H94 O8 N1	0	0	0	0	0	0	0	0	0	0	0	0	0	0	0	0	0	0	0	18090.3	0	1.86611e+08	0	2.58646e+08	0	5.70071e+08	0	0	0	0	0	0	0	0	0	0
0	CerG1(d18:1/24:0)+H-H2O	CerG1(d42:1)+H-H2O	CerG1	(d18:1/24:0)	(d18:1)	(24:0)			794.687	C48 H92 O7 N1	0	20865.9	0	0	0	0	0	0	0	0	0	0	0	0	0	0	0	0	0	803742	0	3.85787e+07	0	5.2283e+07	0	2.45583e+07	0	0	0	0	0	0	0	0	0	0
0	CerG1(d42:1)-H	CerG1(d42:1)-H	CerG1	(d18:1/24:0)	(d18:1)	(24:0)			810.683	C48 H92 O8 N1	0	0	0	0	0	0	0	0	0	0	0	0	0	0	0	0	0	0	0	113162	0	1.77914e+06	0	392979	0	1.46039e+06	0	0	0	0	0	0	0	0	0	0
0	CerG1(d18:1/24:0+O)+H	CerG1(d42:1+O)+H	CerG1	(d18:1/24:0+O)	(d18:1)	(24:0+O)			828.692	C48 H94 O9 N1	0	4.86251e+07	0	4.8421e+06	0	927047	0	1.10139e+07	0	0	0	0	0	44116.5	1.16788e+07	0	4.49394e+06	0	0	0	0	0	0	0	0	0	0	0	0	0	0	0	0	0	0	33778.5		828.691
0	CerG1(d18:1/24:0+O)+H	CerG1(d42:1+O)+H	CerG1	(d18:1/24:0+O)	(d18:1)	(24:0+O)			828.692	C48 H94 O9 N1	0	0	0	0	0	0	0	0	0	0	0	0	0	0	0	0	0	0	0	0	0	0	0	0	0	0	405867	0	5.00044e+06	0	5.08906e+06	0	0	0	0	0
0	CerG1(d18:1/24:0+O)+H	CerG1(d42:1+O)+H	CerG1	(d18:1/24:0+O)	(d18:1)	(24:0+O)			828.692	C48 H94 O9 N1	0	0	0	0	0	0	0	0	0	0	0	0	0	0	0	0	0	0	2.42294e+06	0	4.16367e+06	0	0	0	114190	0	0	0	0	0	0	0	0	0	564405	0
0	CerG1(d18:1/24:0+O)+H	CerG1(d42:1+O)+H	CerG1	(d18:1/24:0+O)	(d18:1)	(24:0+O)			828.692	C48 H94 O9 N1	2.90824e+07	0	1.47598e+09	0	1.33432e+09	0	1.23616e+09	0	1.38069e+07	0	5.2316e+06	0	8.89734e+06	0	17479.1	1.17215e+07	0	2.20086e+09	0	0	0	0	0	0	0	0	0	0	0	112011	0	1.35243e+07	0	0	0	0	828.691		828.691
0	CerG1(d18:1/24:0+O)+H	CerG1(d42:1+O)+H	CerG1	(d18:1/24:0+O)	(d18:1)	(24:0+O)			828.692	C48 H94 O9 N1	0	0	0	0	0	0	0	0	0	0	0	0	0	0	0	0	0	230527	0	0	0	0	0	0	0	0	0	0	0	3.87801e+09	0	3.05365e+08	0	0	0	0
0	CerG1(d18:1/24:0+O)+H	CerG1(d42:1+O)+H	CerG1	(d18:1/24:0+O)	(d18:1)	(24:0+O)			828.692	C48 H94 O9 N1	0	0	0	0	0	0	0	0	0	0	0	0	0	0	0	0	0	0	0	0	0	0	0	0	0	5168.27	0	2.32942e+08	0	0	0	0	0	0	0	0
0	CerG1(d18:1/24:0+O)+H	CerG1(d42:1+O)+H	CerG1	(d18:1/24:0+O)	(d18:1)	(24:0+O)			828.692	C48 H94 O9 N1	0	0	115243	0	80705.6	67104.6	169385	0	0	0	283813	0	0	0	0	0	0	257757	0	5.57743e+07	0	2.50416e+09	0	3.32072e+09	0	1.53601e+09	0	0	0	317382	0	0	0	0	0	0			828.692
0	CerG1(d18:1/24:0+O)+H	CerG1(d42:1+O)+H	CerG1	(d18:1/24:0+O)	(d18:1)	(24:0+O)			828.692	C48 H94 O9 N1	0	0	51146.7	0	46112	0	63275.8	0	0	0	0	0	0	0	0	0	147666	196801	0	1.028e+09	0	841309	0	533619	15057.7	5759.41	0	0	0	5629.07	0	0	0	0	0	1.96803e+07			828.692
1	CerG1(d18:1+hO/24:0)+H-H2O	CerG1(d42:1+hO)+H-H2O	CerG1	(d18:1+hO/24:0)	(d18:1+hO)	(24:0)			810.682	C48 H92 O8 N1	1.96955e+07	0	1.11925e+09	0	1.17806e+09	0	1.54089e+08	0	8.23805e+06	0	8.03423e+08	0	2.87229e+06	0	0	1.11606e+06	0	1.20903e+09	0	0	0	0	0	0	0	0	0	0	0	0	0	5.80872e+06	0	0	0	0	810.682		810.682
0	CerG1(d18:0+pO/24:1)+H-H2O	CerG1(d42:1+pO)+H-H2O	CerG1	(d18:0+pO/24:1)	(d18:0+pO)	(24:1)			810.682	C48 H92 O8 N1	2.04047e+07	0	1.11236e+09	0	1.17511e+09	0	8.28977e+08	0	8.23154e+06	0	8.39638e+08	0	3.15751e+06	0	0	2456.57	0	7.37375e+08	0	0	0	0	0	0	0	0	0	0	0	0	0	6.47137e+06	0	0	0	0	810.682		810.682
1	CerG1(d18:0+pO/24:1)+H-H2O	CerG1(d42:1+pO)+H-H2O	CerG1	(d18:0+pO/24:1)	(d18:0+pO)	(24:1)			810.682	C48 H92 O8 N1	1.94074e+06	0	6.56606e+07	0	184681	0	5.17331e+07	0	4455.38	0	6.35649e+07	0	6088.34	0	0	490430	0	9.4796e+07	0	0	0	0	0	0	0	0	0	0	0	1.02308e+08	0	2.16759e+08	0	0	0	0	810.682		810.68
1	CerG1(d42:1+pO)-H	CerG1(d42:1+pO)-H	CerG1	(d18:0+pO/24:1)	(d18:0+pO)	(24:1)			826.678	C48 H92 O9 N1	1.13006e+06	0	1.09376e+07	0	1.32913e+07	0	1.25406e+07	0	0	0	1.59683e+07	0	4153.52	0	0	0	0	1.9497e+07	0	0	0	0	0	0	0	0	0	0	0	0	0	0	0	0	0	0	826.678		826.678
1	CerG1(d18:0+pO/24:1)+H-H2O	CerG1(d42:1+pO)+H-H2O	CerG1	(d18:0+pO/24:1)	(d18:0+pO)	(24:1)			810.682	C48 H92 O8 N1	0	0	0	0	0	0	0	0	0	0	0	0	0	0	0	0	0	0	0	0	0	0	0	0	0	0	0	0	0	1.71737e+08	0	11009.4	0	0	0	0
1	CerG1(d42:1+pO)-H	CerG1(d42:1+pO)-H	CerG1	(d18:0+pO/24:1)	(d18:0+pO)	(24:1)			826.678	C48 H92 O9 N1	0	0	0	0	0	0	0	0	0	0	0	0	0	0	0	0	0	80029.2	0	0	0	0	0	0	0	158399	0	0	0	3.84178e+07	0	3.66325e+06	0	0	0	0
1	CerG1(d18:0+pO/24:1)+H-H2O	CerG1(d42:1+pO)+H-H2O	CerG1	(d18:0+pO/24:1)	(d18:0+pO)	(24:1)			810.682	C48 H92 O8 N1	0	0	66750.3	0	61372.4	0	0	0	0	0	0	0	0	0	0	0	0	0	0	8.006e+08	0	2.08376e+09	0	2.24626e+09	0	7.72743e+07	0	0	0	0	0	0	0	0	0	609789			810.682
1	CerG1(d42:1+pO)-H	CerG1(d42:1+pO)-H	CerG1	(d18:0+pO/24:1)	(d18:0+pO)	(24:1)			826.678	C48 H92 O9 N1	0	0	0	0	0	0	0	0	0	0	0	0	0	0	0	0	0	0	0	123486	0	2.21399e+07	0	2.78803e+07	0	1.42766e+07	0	0	0	0	0	0	0	0	0	0
1	CerG1(d42:1+pO)-H	CerG1(d42:1+pO)-H	CerG1	(d42:1+pO)	(d42:1+pO)				826.678	C48 H92 O9 N1	0	0	157.018	0	0	0	0	0	0	0	0	0	0	0	0	0	0	0	0	1.08067e+07	0	0	0	973.239	0	0	0	0	0	0	0	0	0	0	0	0			826.678
0	CerG1(d18:1/24:1)+H	CerG1(d42:2)+H	CerG1	(d18:1/24:1)	(d18:1)	(24:1)			810.682	C48 H92 O8 N1	16802	6.09709e+06	0	133883	0	0	0	0	0	0	0	0	0	0	832929	0	8.52824e+06	0	0	0	0	0	0	0	0	0	0	0	0	0	0	0	0	0	0	0		810.681
0	CerG1(d18:1/24:1)+H	CerG1(d42:2)+H	CerG1	(d18:1/24:1)	(d18:1)	(24:1)			810.682	C48 H92 O8 N1	0	0	0	0	0	8021.62	0	0	0	0	0	0	0	0	0	0	0	0	0	0	64173	0	0	0	0	0	502999	0	118987	0	1.2273e+07	0	0	0	0	0
0	CerG1(d18:1/24:1)+H	CerG1(d42:2)+H	CerG1	(d18:1/24:1)	(d18:1)	(24:1)			810.682	C48 H92 O8 N1	828828	0	3.70746e+07	78363.1	3.83318e+07	0	3.15359e+07	0	301345	0	2.69536e+07	0	129355	0	0	0	0	4.5174e+07	0	0	0	0	0	0	0	0	0	0	0	0	0	0	2.18371e+06	0	0	0	810.682		810.682
0	CerG1(d18:2/24:0)+H	CerG1(d42:2)+H	CerG1	(d18:2/24:0)	(d18:2)	(24:0)			810.682	C48 H92 O8 N1	1.99831e+07	0	1.12471e+09	0	1.17745e+09	0	9.11638e+08	0	8.23883e+06	0	8.41252e+08	0	3.19276e+06	0	0	3.31033e+06	0	1.37956e+09	0	0	0	0	0	0	0	0	0	0	0	0	0	6.21095e+06	0	0	0	0	810.682		810.682
0	CerG1(d18:1/24:1)+H	CerG1(d42:2)+H	CerG1	(d18:1/24:1)	(d18:1)	(24:1)			810.682	C48 H92 O8 N1	2.06306e+06	0	6.63724e+07	0	6.3472e+07	0	2.91807e+07	0	2330.31	0	6.32707e+07	0	6635.89	0	0	5696.94	0	9.7121e+07	0	0	0	0	0	0	0	0	0	0	0	9.49248e+07	0	1.4294e+08	0	0	0	0	810.682		810.682
0	CerG1(d42:2)-H	CerG1(d42:2)-H	CerG1	(d18:1/24:1)	(d18:1)	(24:1)			808.667	C48 H90 O8 N1	0	0	0	0	0	42442.3	0	0	0	0	0	0	0	37378.5	0	0	0	0	0	0	0	0	0	0	0	0	0	0	0	0	0	1.58818e+06	0	0	0	0
0	CerG1(d42:2)-H	CerG1(d42:2)-H	CerG1	(d42:2)	(d42:2)				808.667	C48 H90 O8 N1	0	0	0	0	0	0	0	0	0	0	0	0	0	0	0	0	0	0	0	0	0	0	0	0	0	0	0	0	0	6.27184e+06	0	0	0	0	0	0
0	CerG1(d18:1/24:1)+H	CerG1(d42:2)+H	CerG1	(d18:1/24:1)	(d18:1)	(24:1)			810.682	C48 H92 O8 N1	0	0	0	0	0	0	0	0	0	0	0	0	0	0	0	0	0	0	0	0	0	0	0	0	0	267418	0	1.50345e+08	0	0	0	0	0	0	0	0
0	CerG1(d18:1/24:1)+H	CerG1(d42:2)+H	CerG1	(d18:1/24:1)	(d18:1)	(24:1)			810.682	C48 H92 O8 N1	0	0	0	0	0	0	0	0	0	0	0	0	0	0	0	0	0	0	0	3.72903e+07	0	7.0266e+07	0	5.63581e+07	0	1.19652e+09	0	0	0	0	0	0	0	0	0	0
0	CerG1(d42:2)-H	CerG1(d42:2)-H	CerG1	(d18:1/24:1)	(d18:1)	(24:1)			808.667	C48 H90 O8 N1	0	0	0	0	0	12347.4	0	0	0	0	0	77211.6	0	0	0	0	22595.8	0	0	0	0	362135	0	4.49922e+06	0	2.5602e+06	15606.1	0	0	0	0	0	0	0	0	0
1	CerG1(d42:2)-H	CerG1(d42:2)-H	CerG1	(d42:2)	(d42:2)				808.667	C48 H90 O8 N1	0	0	0	0	0	0	0	0	0	0	0	0	0	0	0	0	0	0	0	0	0	4.85367e+06	0	3.13345e+06	0	0	0	0	0	0	0	0	0	0	0	0
0	CerG1(d18:1/24:1)+H	CerG1(d42:2)+H	CerG1	(d18:1/24:1)	(d18:1)	(24:1)			810.682	C48 H92 O8 N1	0	0	0	0	0	0	0	0	0	0	0	0	0	0	0	0	0	235948	0	7.48827e+06	0	0	0	451828	0	0	0	0	0	184219	0	0	0	523701	0	7.54884e+07
1	CerG1(d18:2/24:0+O)+H	CerG1(d42:2+O)+H	CerG1	(d18:2/24:0+O)	(d18:2)	(24:0+O)			826.677	C48 H92 O9 N1	1.90653e+06	0	8.43645e+08	0	4.08859e+07	0	4.41247e+08	0	169153	0	2.6799e+07	0	2.48966e+06	0	0	1.09651e+06	0	9.73178e+08	0	0	0	0	0	0	0	0	0	0	0	0	0	7508.72	0	0	0	0	826.677		826.677
0	CerG1(d18:2/24:0+O)+H	CerG1(d42:2+O)+H	CerG1	(d18:2/24:0+O)	(d18:2)	(24:0+O)			826.677	C48 H92 O9 N1	0	0	1628.94	42575.6	0	0	0	0	0	0	33206.5	0	0	0	0	0	0	0	0	4.64676e+08	0	0	0	20411.1	0	0	0	0	0	0	0	0	0	0	0	0			826.677
1	CerG1(d42:2+hO)-H	CerG1(d42:2+hO)-H	CerG1	(d42:2+hO)	(d42:2+hO)				824.662	C48 H90 O9 N1	122600	0	1.00662e+07	0	1.42051e+07	0	1.1256e+07	0	0	0	37494.2	0	0	0	0	0	0	1.12185e+07	0	0	0	0	0	0	0	0	0	0	0	0	0	0	0	0	0	0	824.662		824.659
0	CerG1(d18:0+pO/24:2)+H-H2O	CerG1(d42:2+pO)+H-H2O	CerG1	(d18:0+pO/24:2)	(d18:0+pO)	(24:2)			808.666	C48 H90 O8 N1	407184	0	80937.8	0	2.95917e+07	0	2.81125e+07	0	0	29356.7	40150.5	0	0	0	0	0	0	3.70262e+07	0	0	0	0	0	0	88037.8	1544.19	0	0	0	4599.8	0	559556	0	0	0	0	808.666		808.664
0	CerG1(d42:2+pO)-H	CerG1(d42:2+pO)-H	CerG1	(d18:0+pO/24:2)	(d18:0+pO)	(24:2)			824.662	C48 H90 O9 N1	122600	0	6.67953e+06	0	1.42051e+07	0	1.549e+07	0	0	0	8.94924e+06	0	0	0	0	0	0	1.48193e+07	0	0	0	0	0	0	0	0	0	0	0	0	0	0	0	0	0	0	824.662		824.662
0	CerG1(d18:0+pO/24:2)+H-H2O	CerG1(d42:2+pO)+H-H2O	CerG1	(d18:0+pO/24:2)	(d18:0+pO)	(24:2)			808.666	C48 H90 O8 N1	0	0	0	0	0	0	0	0	0	0	0	0	0	0	0	0	0	0	0	0	0	0	0	0	0	0	0	0	0	6.50281e+07	0	1.71495e+06	0	0	0	0
0	CerG1(d42:2+pO)-H	CerG1(d42:2+pO)-H	CerG1	(d18:0+pO/24:2)	(d18:0+pO)	(24:2)			824.662	C48 H90 O9 N1	0	0	0	0	0	0	0	0	0	0	0	0	0	0	0	0	0	0	0	0	0	0	0	0	0	0	0	0	0	1.78414e+07	0	0	0	0	0	681.012
0	CerG1(d42:2+pO)-H	CerG1(d42:2+pO)-H	CerG1	(d42:2+pO)	(d42:2+pO)				824.662	C48 H90 O9 N1	0	0	0	0	0	0	0	0	0	0	0	0	0	0	0	0	0	0	0	15803.4	0	8.92444e+06	0	1.22196e+07	0	5.3217e+06	0	0	0	0	0	0	0	0	0	0
0	CerG1(d18:2/24:1)+H	CerG1(d42:3)+H	CerG1	(d18:2/24:1)	(d18:2)	(24:1)			808.666	C48 H90 O8 N1	341622	0	2.48694e+07	0	3.09368e+07	0	1.00132e+07	80267.1	0	0	2.44149e+07	0	0	0	0	0	0	4.52839e+07	0	0	0	0	0	0	0	0	0	0	0	0	0	0	0	67304.1	0	0	808.666		808.665
0	CerG1(d18:2/24:1)+H	CerG1(d42:3)+H	CerG1	(d18:2/24:1)	(d18:2)	(24:1)			808.666	C48 H90 O8 N1	0	0	0	8487.83	0	0	0	0	0	0	0	0	0	0	0	0	0	52784.9	0	0	0	745.475	0	940.973	0	0	0	0	0	1.38935e+08	0	1.32168e+06	0	0	0	0
0	CerG1(d18:2/24:1)+H	CerG1(d42:3)+H	CerG1	(d18:2/24:1)	(d18:2)	(24:1)			808.666	C48 H90 O8 N1	0	0	0	0	0	0	0	0	0	0	0	0	0	0	0	0	0	0	1265.79	0	0	0	0	0	0	5.20144e+07	0	0	0	0	0	0	0	0	0	0
0	CerG1(d18:2/24:1)+H	CerG1(d42:3)+H	CerG1	(d18:2/24:1)	(d18:2)	(24:1)			808.666	C48 H90 O8 N1	0	0	0	0	0	0	0	0	0	47690.1	0	16137	0	20031.2	0	0	0	0	0	3.6453e+07	0	1.16699e+08	0	1.1561e+08	0	4.06211e+06	0	0	0	0	0	0	0	0	0	0
0	CerG1(d18:0+pO/25:0)+H-H2O	CerG1(d43:0+pO)+H-H2O	CerG1	(d18:0+pO/25:0)	(d18:0+pO)	(25:0)			826.713	C49 H96 O8 N1	201639	0	1.22935e+07	0	1.08424e+07	0	1.06879e+07	0	0	0	8.04333e+06	0	0	0	0	0	0	420167	0	0	0	0	0	0	0	0	0	0	0	720252	0	3504.16	0	0	0	0	826.713		826.713
0	CerG1(d18:0+pO/25:0)+H-H2O	CerG1(d43:0+pO)+H-H2O	CerG1	(d18:0+pO/25:0)	(d18:0+pO)	(25:0)			826.713	C49 H96 O8 N1	0	0	0	0	0	0	0	0	0	0	0	0	0	0	0	0	0	0	0	1.11889e+07	0	3.43607e+07	0	5.82846e+07	0	0	0	0	0	0	0	0	0	0	0	324072
0	CerG1(d18:1/25:0)+H	CerG1(d43:1)+H	CerG1	(d18:1/25:0)	(d18:1)	(25:0)			826.713	C49 H96 O8 N1	194688	0	1.1787e+07	0	8.6147e+06	0	2.41005e+06	0	0	0	6.11853e+06	0	0	0	0	0	0	124364	0	0	0	0	0	0	378.161	0	0	0	0	1.36625e+06	0	3610.08	0	0	0	0	826.713		826.712
0	CerG1(d18:1/25:0)+H	CerG1(d43:1)+H	CerG1	(d18:1/25:0)	(d18:1)	(25:0)			826.713	C49 H96 O8 N1	0	0	0	0	0	0	0	0	0	0	0	0	0	0	0	0	0	0	0	0	0	0	0	0	0	0	0	0	0	6.31652e+07	0	264427	0	0	0	0
0	CerG1(d18:1/25:0)+H	CerG1(d43:1)+H	CerG1	(d18:1/25:0)	(d18:1)	(25:0)			826.713	C49 H96 O8 N1	0	0	0	0	0	0	0	0	0	0	0	0	0	0	0	0	0	0	0	3.89056e+06	0	3.43428e+07	0	5.90695e+07	0	1.91668e+07	0	0	132191	0	0	0	0	0	0	688202
0	CerG1(d18:1/25:0+O)+H	CerG1(d43:1+O)+H	CerG1	(d18:1/25:0+O)	(d18:1)	(25:0+O)			842.708	C49 H96 O9 N1	625298	0	2.77966e+07	0	2.89301e+07	0	2.61528e+07	0	253369	0	2.35958e+07	0	0	0	0	0	0	5.99294e+07	0	0	0	0	0	0	0	0	0	0	0	11116.2	0	503894	0	0	0	0	842.708		842.707
0	CerG1(d18:1/25:0+O)+H	CerG1(d43:1+O)+H	CerG1	(d18:1/25:0+O)	(d18:1)	(25:0+O)			842.708	C49 H96 O9 N1	0	0	0	0	0	0	0	0	0	0	0	0	0	0	0	0	0	0	0	0	0	0	0	0	0	0	0	0	0	1.67592e+08	0	0	0	0	0	0
1	CerG1(d18:1/25:0+O)+H	CerG1(d43:1+O)+H	CerG1	(d18:1/25:0+O)	(d18:1)	(25:0+O)			842.708	C49 H96 O9 N1	0	0	141647	0	0	0	0	0	0	0	0	0	0	0	0	0	0	0	0	1.69704e+06	0	1.04721e+08	0	725385	0	6.72111e+07	0	0	0	0	0	0	0	0	0	0			842.708
0	CerG1(d18:1/25:0+O)+H	CerG1(d43:1+O)+H	CerG1	(d18:1/25:0+O)	(d18:1)	(25:0+O)			842.708	C49 H96 O9 N1	0	0	0	0	0	0	0	0	0	0	0	0	0	0	0	0	0	0	0	2.78315e+07	0	0	0	314823	0	0	0	0	0	0	0	0	0	0	0	0
0	CerG1(d18:0+pO/25:1)+H-H2O	CerG1(d43:1+pO)+H-H2O	CerG1	(d18:0+pO/25:1)	(d18:0+pO)	(25:1)			824.697	C49 H94 O8 N1	0	0	0	0	0	0	0	0	0	0	0	0	0	0	0	0	0	0	0	0	0	89383.5	0	5.93247e+07	0	434407	0	0	0	0	0	0	0	0	0	0
0	CerG1(d18:1/25:1)+H	CerG1(d43:2)+H	CerG1	(d18:1/25:1)	(d18:1)	(25:1)			824.697	C49 H94 O8 N1	469566	0	1.80985e+07	0	33740.3	0	1.43235e+07	0	0	0	1.18684e+07	0	0	0	0	0	0	2.49875e+07	0	0	0	0	0	0	0	0	0	0	0	0	0	0	0	0	0	0	824.697		824.696
0	CerG1(d18:1/25:1)+H	CerG1(d43:2)+H	CerG1	(d18:1/25:1)	(d18:1)	(25:1)			824.697	C49 H94 O8 N1	0	0	0	0	0	0	0	0	0	0	0	0	0	0	0	0	0	0	0	0	0	0	0	0	0	0	0	0	0	6.81135e+07	0	0	0	0	0	0
0	CerG1(d43:2)+H	CerG1(d43:2)+H	CerG1	(d43:2)	(d43:2)				824.697	C49 H94 O8 N1	0	0	0	0	0	0	0	0	0	0	0	0	0	0	0	0	0	0	0	0	0	2.79183e+07	0	2.16835e+06	0	0	0	0	0	0	0	0	0	0	0	0
0	CerG1(d18:1/26:0)+H	CerG1(d44:1)+H	CerG1	(d18:1/26:0)	(d18:1)	(26:0)			840.729	C50 H98 O8 N1	0	0	5.29523e+06	0	963842	0	832257	0	4837.74	0	1.99003e+06	0	0	0	0	0	2283.6	1.38336e+07	0	0	0	0	0	0	0	0	0	0	0	0	0	12727.3	0	0	0	0			840.728
0	CerG1(d18:1/26:0)+H	CerG1(d44:1)+H	CerG1	(d18:1/26:0)	(d18:1)	(26:0)			840.729	C50 H98 O8 N1	0	0	0	0	0	0	0	0	0	0	0	0	0	0	0	0	0	0	0	0	0	0	0	0	0	0	0	3609.21	0	2.56146e+07	0	457600	0	0	0	0
0	CerG1(d18:1/26:0)+H	CerG1(d44:1)+H	CerG1	(d18:1/26:0)	(d18:1)	(26:0)			840.729	C50 H98 O8 N1	0	0	0	0	0	0	0	0	0	0	0	0	0	0	0	0	0	0	0	417590	0	1.24163e+07	0	2.18389e+07	0	11022.9	0	0	0	0	0	0	0	0	0	0
0	CerG1(d18:1/26:0+O)+H	CerG1(d44:1+O)+H	CerG1	(d18:1/26:0+O)	(d18:1)	(26:0+O)			856.724	C50 H98 O9 N1	0	0	3.46938e+07	0	2.53614e+07	0	2.11872e+07	0	0	0	2.27051e+07	0	0	0	0	0	0	432794	0	0	0	0	0	0	0	0	0	0	0	0	0	0	0	0	0	0			856.723
0	CerG1(d18:1/26:0+O)+H	CerG1(d44:1+O)+H	CerG1	(d18:1/26:0+O)	(d18:1)	(26:0+O)			856.724	C50 H98 O9 N1	0	0	0	0	0	826.437	0	0	0	0	0	0	0	0	0	0	0	0	0	0	0	0	0	0	0	0	0	0	0	1.25097e+08	0	0	0	0	0	0
0	CerG1(d18:1/26:0+O)+H	CerG1(d44:1+O)+H	CerG1	(d18:1/26:0+O)	(d18:1)	(26:0+O)			856.724	C50 H98 O9 N1	0	0	0	0	0	42612.9	0	0	0	0	0	0	0	0	0	0	0	0	0	2.43671e+06	0	1.55494e+07	0	2.24613e+07	0	3.23239e+07	0	0	0	0	0	0	0	0	0	0
0	CerG1(d18:1/26:0+O)+H	CerG1(d44:1+O)+H	CerG1	(d18:1/26:0+O)	(d18:1)	(26:0+O)			856.724	C50 H98 O9 N1	0	0	0	0	33348.3	0	0	0	0	0	0	0	0	0	0	0	0	0	0	1.69209e+07	0	420200	0	2.53044e+06	0	1.43458e+07	0	0	0	0	0	0	0	0	0	0
1	CerG1(d18:0+pO/26:1)+H-H2O	CerG1(d44:1+pO)+H-H2O	CerG1	(d18:0+pO/26:1)	(d18:0+pO)	(26:1)			838.713	C50 H96 O8 N1	0	0	0	0	0	0	0	0	0	0	0	0	0	0	0	0	25633.7	0	0	0	0	79746.1	0	3.25188e+07	0	535758	0	0	0	0	0	0	0	0	0	0
0	CerG1(d18:1/26:1)+H	CerG1(d44:2)+H	CerG1	(d18:1/26:1)	(d18:1)	(26:1)			838.713	C50 H96 O8 N1	0	0	1.57367e+07	0	1.50236e+07	86781.3	1.32836e+07	0	0	0	75867.5	0	0	0	0	0	0	1.95061e+07	0	0	0	0	0	0	0	0	0	0	0	0	0	0	0	0	0	0			838.712
0	CerG1(d18:1/26:1)+H	CerG1(d44:2)+H	CerG1	(d18:1/26:1)	(d18:1)	(26:1)			838.713	C50 H96 O8 N1	0	0	0	0	0	0	0	0	0	0	0	0	0	0	0	0	0	0	0	0	28937.9	0	0	0	0	0	0	0	0	3.90444e+07	0	0	0	0	0	0
0	CerG1(d18:1/29:3)+H-H2O	CerG1(d47:4)+H-H2O	CerG1	(d18:1/29:3)	(d18:1)	(29:3)			858.718	C53 H96 O7 N1	0	0	6.33793e+06	0	1.51296e+07	0	2.55395e+06	0	0	0	1.52591e+07	0	0	0	0	0	0	0	0	0	0	0	0	0	0	0	0	0	0	1.48215e+06	0	0	0	0	0	0			858.718
0	CerG1(d18:1/29:3)+H-H2O	CerG1(d47:4)+H-H2O	CerG1	(d18:1/29:3)	(d18:1)	(29:3)			858.718	C53 H96 O7 N1	0	0	0	0	0	0	0	0	0	0	0	0	0	0	0	0	0	370330	0	0	0	0	0	0	0	0	0	0	0	2.33134e+07	0	0	0	0	0	0
0	CerG1(d48:3)+H-H2O	CerG1(d48:3)+H-H2O	CerG1	(d48:3)	(d48:3)				874.749	C54 H100 O7 N1	0	0	3.31172e+06	0	4.29548e+06	0	2.51534e+06	0	0	0	5.00475e+06	245327	0	0	0	0	0	0	0	0	0	0	0	0	0	0	0	0	0	0	0	222471	0	0	0	0			874.749
0	CerG1(d49:4)+H-H2O	CerG1(d49:4)+H-H2O	CerG1	(d49:4)	(d49:4)				886.749	C55 H100 O7 N1	0	0	0	0	0	0	0	0	0	0	0	0	0	0	0	0	0	0	0	1.50166e+06	0	8.874e+06	0	3.80933e+07	0	395157	0	0	0	0	0	0	0	0	0	0
0	CerG1(d52:4)+H-H2O	CerG1(d52:4)+H-H2O	CerG1	(d52:4)	(d52:4)				928.796	C58 H106 O7 N1	0	0	1.02255e+07	0	1.6149e+07	0	0	0	0	0	7.77963e+06	0	0	0	0	0	0	0	0	0	0	0	0	0	0	0	0	0	0	0	0	0	0	0	0	0			928.796
0	CerG2(d38:2)-H	CerG2(d38:2)-H	CerG2	(d38:2)	(d38:2)				914.657	C50 H92 O13 N1	5843.59	0	3.82285e+06	0	4.12325e+06	0	751304	0	0	0	4.54865e+06	0	0	0	0	0	0	1.44434e+06	0	0	0	0	0	0	0	0	0	0	0	0	0	0	0	0	0	0	914.657		914.657
0	CerP(d18:1/30:4)+H	CerP(d48:5)+H	CerP	(d18:1/30:4)	(d18:1)	(30:4)			806.642	C48 H89 O6 N1 P1	0	0	0	0	0	0	0	0	0	0	0	0	0	0	0	0	0	122787	0	0	0	0	0	0	0	0	0	235498	0	2.05436e+07	0	0	0	0	0	0
0	DG(4:0/10:1)+NH4	DG(14:1)+NH4	DG	(4:0/10:1)	(4:0)	(10:1)			332.243	C17 H34 O5 N1	8.16352e+06	2.63442e+06	2.30503e+07	1.28345e+07	6.83353e+07	1.11211e+07	4.0576e+07	943813	4.95674e+07	1.09079e+06	4.4518e+07	692127	4.12683e+07	1.13927e+06	1.4687e+06	4.69618e+07	4.61424e+06	7.28811e+06	976497	2.19665e+06	3.48676e+06	2.98722e+06	1.19676e+06	1.83607e+06	720704	3.14655e+06	1.19368e+06	3.16351e+07	2.60213e+06	6.76593e+06	2.00057e+06	3.72551e+06	3.38969e+06	2.74841e+06	593029	2.10458e+06	332.243	332.243	332.243
0	DG(4:0/10:2)+NH4	DG(14:2)+NH4	DG	(4:0/10:2)	(4:0)	(10:2)			330.228	C17 H32 O5 N1	5.64213e+07	1.70689e+06	1.06143e+08	1.25722e+06	4.03327e+07	7.85353e+06	5.43499e+07	4.88507e+06	4.16908e+07	1.58624e+06	4.77215e+07	1.63718e+06	4.8612e+07	984073	795010	6.38705e+07	5.15677e+06	4.99249e+07	511395	700337	2.18754e+06	2.92976e+06	480083	980671	2.44004e+06	5.30142e+06	1.18907e+06	4.27631e+07	769630	1.16874e+07	909110	1.44856e+07	5.10306e+06	1.00609e+06	760234	1.53159e+06	330.228	330.228	330.227
0	DG(14:3)+H	DG(14:3)+H	DG	(14:3)	(14:3)				311.185	C17 H27 O5	1.77852e+06	21379.2	311096	120419	982312	35692.6	706818	19568	475536	28125.3	614828	45952.6	1.28091e+06	264964	12245	552069	35873.7	376411	130982	2.57093e+06	0	7.50297e+06	23299.2	2.76279e+06	21199.7	1.45682e+06	286407	3.12777e+06	22146.1	433182	91107.5	835153	99434.3	1.59759e+06	77669.3	698054	311.185	311.185	311.185
0	DG(17:0)+NH4	DG(17:0)+NH4	DG	(17:0)	(17:0)				376.306	C20 H42 O5 N1	1.119e+07	96187.3	3.04789e+07	98926.2	1.00226e+07	0	1.85028e+07	0	1.51683e+07	0	1.54768e+07	0	1.01693e+07	0	119154	2.10742e+07	138324	2.36393e+07	0	74330.3	75005.5	986925	105152	713000	88959.5	1.37813e+06	130402	6.91519e+06	40462.7	2.66519e+06	397198	657827	0	184836	0	60215.3	376.306	376.306	376.305
0	DG(17:0)+NH4	DG(17:0)+NH4	DG	(17:0)	(17:0)				376.306	C20 H42 O5 N1	0	0	0	0	3067.23	0	3938.21	0	0	0	0	1249.4	0	38069.3	25755.1	0	0	0	0	412357	0	161807	806.324	471359	0	165989	136819	1.71408e+06	5635.12	1.23473e+07	2725.65	0	63652.4	45334.4	772.429	752697
0	DG(17:0)+NH4	DG(17:0)+NH4	DG	(17:0)	(17:0)				376.306	C20 H42 O5 N1	323982	23839.5	2.10712e+06	0	1.47816e+06	0	726084	0	786107	0	637817	34019	1.07128e+06	44061.7	40772.3	188520	15345.7	296900	174304	4.0011e+06	42856	3.49729e+06	96066.9	1.72396e+07	122947	1.67359e+07	102070	2.34128e+07	202978	3.84032e+06	329973	939715	137011	359222	212583	1.08635e+06	376.306	376.306	376.306
0	DG(17:2)+NH4	DG(17:2)+NH4	DG	(17:2)	(17:2)				372.274	C20 H38 O5 N1	2.94297e+07	2.83791e+06	1.27478e+08	2.7863e+06	9.00355e+06	1.17205e+06	1.41226e+07	801716	3.07543e+07	1.59672e+06	2.77241e+07	532793	2.19536e+07	419082	359634	2.32002e+07	1.37494e+06	3.68377e+07	300945	1.65689e+06	1.1666e+06	1.17497e+06	337760	1.37375e+06	1.62812e+06	1.43747e+06	319694	1.68925e+07	437843	1.12277e+07	316018	2.34142e+07	2.35836e+06	191442	712939	1.58219e+06	372.274	372.274	372.274
0	DG(6:0/11:3)+NH4	DG(17:3)+NH4	DG	(6:0/11:3)	(6:0)	(11:3)			370.259	C20 H36 O5 N1	3.08112e+06	136106	3.767e+06	142188	877910	308426	5.77644e+06	80065.9	7.66905e+06	743971	2.06455e+06	252895	9.57241e+06	2.59156e+06	251301	1.25392e+07	558816	2.2286e+06	55185	1.88173e+07	850906	6.80799e+07	216704	7.65087e+07	291178	1.72641e+07	1.43694e+06	9.41959e+06	258045	4.95816e+06	114898	3.19455e+06	2.67765e+06	6.34994e+07	261010	3.73648e+07	370.259	370.259
0	DG(18:0p)+NH4	DG(18:0p)+NH4	DG	(18:0p)	(18:0p)				374.326	C21 H44 O4 N1	392970	0	185153	99997.8	143139	0	252419	0	97234	0	167591	0	301250	0	0	10482	179598	8635.35	0	400539	0	724510	0	389398	0	676316	0	65427.8	0	4.73551e+06	14654.2	570861	0	972672	0	1193.48	374.326		374.326
0	DG(18:0p)+NH4	DG(18:0p)+NH4	DG	(18:0p)	(18:0p)				374.326	C21 H44 O4 N1	144190	0	142411	0	5701.93	0	109605	0	0	0	223709	0	570790	48463.3	0	144807	0	207877	0	1.07178e+06	0	537465	0	2.26765e+06	0	1.03163e+06	0	6.59475e+06	0	203596	0	4649.05	41914.8	477859	0	387032	374.326		374.326
0	DG(18:0p)+NH4	DG(18:0p)+NH4	DG	(18:0p)	(18:0p)				374.326	C21 H44 O4 N1	122266	0	2414.4	0	207429	0	552447	12151.1	248963	0	112400	0	380102	111845	0	262821	0	2821.04	0	564133	0	1.03934e+06	0	967226	0	7.02274e+06	0	4483.77	130701	0	139.865	140263	0	195682	0	297817	374.326		374.326
0	DG(19:1)+NH4	DG(19:1)+NH4	DG	(19:1)	(19:1)				402.321	C22 H44 O5 N1	225757	153863	376833	1.00888e+06	440759	195438	447191	141089	279207	251538	762849	0	176461	73275.5	277498	371017	3.93105e+07	313558	0	190841	0	208877	0	433855	0	0	0	673603	0	167333	72235.4	9155.76	0	550092	0	172183	402.321	402.321	402.321
0	DG(8:0/11:2)+NH4	DG(19:2)+NH4	DG	(8:0/11:2)	(8:0)	(11:2)			400.306	C22 H42 O5 N1	3.52293e+06	77717	3.03186e+07	286597	7.6821e+06	25090.3	1.57989e+07	218335	1.2547e+07	30564.4	1.07888e+07	19769.9	5.4821e+06	322392	533304	2.53698e+07	297446	1.06983e+07	78455	616678	22875.3	897801	214819	962876	300831	721473	515079	1.25673e+07	443475	2.48916e+06	92895.2	2.1424e+07	128267	694608	31488.2	682701	400.306	400.306	400.306
0	DG(4:0/16:0)+NH4	DG(20:0)+NH4	DG	(4:0/16:0)	(4:0)	(16:0)			418.353	C23 H48 O5 N1	1.71029e+06	1.29857e+06	383699	97612.8	1.19697e+06	0	1.00417e+06	0	527445	107843	361535	76787.2	1.08655e+06	71716.3	132667	18036.4	1.32771e+07	491279	0	253118	0	176254	133715	0	0	473050	0	0	184118	531941	198337	812254	0	159117	0	156974	418.353	418.353	418.353
0	DG(21:1)+NH4	DG(21:1)+NH4	DG	(21:1)	(21:1)				430.353	C24 H48 O5 N1	1290.63	0	0	213484	30168	0	0	0	82041.4	142762	93068.8	711102	57809.1	4476.2	0	0	0	0	967222	18195.2	1.93305e+07	0	86087.5	0	1.20236e+07	0	0	0	121339	0	0	0	0	19116.3	1.35737e+06	0	430.353
0	DG(21:1)+H	DG(21:1)+H	DG	(21:1)	(21:1)				413.326	C24 H45 O5	0	271563	0	2826.52	0	0	0	95343.8	0	0	0	0	0	0	2518.68	0	0	0	1.02991e+06	0	2.16074e+06	0	20542.4	0	4.09417e+06	0	0	0	0	0	0	0	627289	0	229501	0		413.326
0	DG(21:1)+NH4	DG(21:1)+NH4	DG	(21:1)	(21:1)				430.353	C24 H48 O5 N1	1644.1	0	2245.58	0	0	70634.7	4741.61	0	0	0	3217.38	0	0	45624.7	0	2455.97	0	4133.91	0	185311	0	163715	0	140036	0	0	37946.4	2.87937e+07	0	2651.56	0	6078.07	0	209597	0	2982.45	430.353		430.353
0	DG(21:1)+NH4	DG(21:1)+NH4	DG	(21:1)	(21:1)				430.353	C24 H48 O5 N1	2703.76	37123.4	0	1505.2	290025	0	0	0	3054.18	0	0	135111	4576.99	71659.7	343308	0	0	0	0	8.10565e+06	0	9066.29	0	0	0	3.22314e+07	0	153065	0	6745.97	0	0	0	509.219	0	93975.1	430.353	430.353
0	DG(21:1)+NH4	DG(21:1)+NH4	DG	(21:1)	(21:1)				430.353	C24 H48 O5 N1	188493	0	469123	0	172837	0	0	0	131080	0	225391	0	112570	29927.9	35986.6	136561	105775	0	0	5.23652e+07	0	8.42103e+07	0	6.72088e+07	0	153456	0	0	0	0	0	0	0	2.72105e+07	0	0	430.353		430.353
0	DG(21:1)+NH4	DG(21:1)+NH4	DG	(21:1)	(21:1)				430.353	C24 H48 O5 N1	271866	0	0	0	0	107774	72910.7	0	0	0	0	3.08813e+06	116026	4.21422e+06	0	146521	1780.23	0	211797	0	3530.3	6002.82	39922.9	1.32404e+06	27554	2817.86	100.578	154300	0	0	0	5180.67	0	105011	0	5.69333e+07	430.353
0	DG(21:1)+NH4	DG(21:1)+NH4	DG	(21:1)	(21:1)				430.353	C24 H48 O5 N1	0	1143.29	4881.94	329302	81152.8	0	4247.47	0	0	0	208883	2.34356e+07	0	3.01498e+07	0	0	1.80903e+07	8375.76	0	3936.8	0	4519.96	0	5091.12	0	0	8096.29	3331.2	139028	0	0	0	0	551953	0	0		430.353	430.353
0	DG(21:1)+NH4	DG(21:1)+NH4	DG	(21:1)	(21:1)				430.353	C24 H48 O5 N1	0	21651.4	306884	0	611862	571405	249562	3.45203e+06	0	5.94615e+07	191225	604206	0	129680	97185.4	0	154966	80076.8	0	153627	0	426173	149514	256152	0	0	0	455085	60178.3	483914	0	347925	165558	96844.2	0	139646			430.353
0	DG(21:1)+NH4	DG(21:1)+NH4	DG	(21:1)	(21:1)				430.353	C24 H48 O5 N1	231018	4.5482e+07	245067	1.96665e+08	0	0	260172	174210	179744	71566.3	193909	0	0	0	2.35683e+07	267467	1.7904e+08	523340	0	0	0	0	62324.9	950181	47901.9	0	0	427440	1.3973e+07	308215	3.21804e+07	941081	0	264185	0	0	430.353	430.352	430.353
0	DG(21:1)+NH4	DG(21:1)+NH4	DG	(21:1)	(21:1)				430.353	C24 H48 O5 N1	579.676	0	38785.3	0	1532.85	0	48504.8	0	71505.3	0	1376.38	0	24450.2	2692.08	1187.45	2324.39	0	61123.5	5988.48	0	0	7366.58	65207.1	0	987135	0	3625.93	11138.2	1.18447e+06	87120.9	0	0	0	0	5623.44	0	430.353		430.353
0	DG(24:3p)+NH4	DG(24:3p)+NH4	DG	(24:3p)	(24:3p)				452.373	C27 H50 O4 N1	107138	0	0	0	0	0	1237.71	0	254.832	0	1180.17	0	264.691	0	0	53186.2	0	166872	0	73761.1	0	2.78905e+06	0	7.67772e+06	0	42962	0	308461	0	41951	0	85520.8	0	0	0	0	452.373
0	DG(16:0/14:0)+NH4	DG(30:0)+NH4	DG	(16:0/14:0)	(16:0)	(14:0)			558.509	C33 H68 O5 N1	0	8971.48	0	176852	0	0	0	0	0	0	0	0	0	0	314721	0	1.35269e+06	0	0	0	0	0	0	0	0	0	369067	0	0	0	0	0	0	0	0	0		558.509
0	DG(16:0/14:0)+NH4	DG(30:0)+NH4	DG	(16:0/14:0)	(16:0)	(14:0)			558.509	C33 H68 O5 N1	0	0	0	0	0	0	0	0	0	0	0	0	0	0	0	0	0	0	0	0	0	0	38115.6	0	0	0	1.09826e+06	0	0	0	747629	0	0	0	0	0
0	DG(16:0/14:0)+NH4	DG(30:0)+NH4	DG	(16:0/14:0)	(16:0)	(14:0)			558.509	C33 H68 O5 N1	0	0	0	0	0	0	0	0	0	0	0	0	0	0	0	0	0	0	0	184226	0	502153	0	0	0	0	0	0	0	6.7127e+06	0	0	0	0	0	0
0	DG(16:0/14:0)+NH4	DG(30:0)+NH4	DG	(16:0/14:0)	(16:0)	(14:0)			558.509	C33 H68 O5 N1	0	0	0	0	0	0	0	0	0	0	0	0	0	0	0	0	0	0	0	1.90681e+07	0	1.87565e+07	0	1.9012e+07	0	513080	0	0	0	0	0	0	0	0	0	0
0	DG(16:0/16:0)+NH4	DG(32:0)+NH4	DG	(16:0/16:0)	(16:0)	(16:0)			586.541	C35 H72 O5 N1	0	2.19059e+06	0	1.07892e+06	0	0	0	0	0	0	0	0	0	0	2.08457e+06	0	908576	0	0	0	0	0	0	0	0	0	0	0	0	0	0	0	0	0	0	0		586.54
0	DG(16:0/16:0)+NH4	DG(32:0)+NH4	DG	(16:0/16:0)	(16:0)	(16:0)			586.541	C35 H72 O5 N1	0	0	0	0	0	0	0	0	0	0	0	0	0	0	0	0	0	0	322686	0	136520	0	34999.1	0	137675	0	1.40796e+07	0	4.07249e+06	0	4.73135e+06	0	35921.6	0	402127	0
0	DG(16:0/16:0)+NH4	DG(32:0)+NH4	DG	(16:0/16:0)	(16:0)	(16:0)			586.541	C35 H72 O5 N1	0	0	0	0	0	0	0	0	0	0	0	19121.3	0	0	0	0	0	0	66112.7	0	656303	0	54204.9	0	770022	0	130421	0	0	0	0	0	4.97899e+06	0	3.35712e+06	0
0	DG(16:0/16:0)+NH4	DG(32:0)+NH4	DG	(16:0/16:0)	(16:0)	(16:0)			586.541	C35 H72 O5 N1	1.53009e+06	0	4.94829e+06	0	4.25413e+06	0	5.24225e+06	0	2.92452e+06	0	4.80439e+06	0	1.47898e+06	0	0	15504.9	0	8.21872e+06	0	0	0	0	0	0	0	0	0	0	0	0	0	0	0	0	0	0	586.54		586.54
0	DG(16:0/16:0)+NH4	DG(32:0)+NH4	DG	(16:0/16:0)	(16:0)	(16:0)			586.541	C35 H72 O5 N1	0	0	405186	0	0	0	0	0	0	0	0	0	0	2190.18	0	0	0	0	0	0	0	0	0	0	0	0	0	0	0	0	0	1.29694e+07	0	0	0	0			586.54
0	DG(16:0/16:0)+NH4	DG(32:0)+NH4	DG	(16:0/16:0)	(16:0)	(16:0)			586.541	C35 H72 O5 N1	0	0	6109.48	0	2699.29	0	78258.2	0	0	0	0	0	0	0	0	0	0	496195	0	0	0	2327.49	0	298086	0	0	0	0	0	3.02646e+07	0	2384.18	0	0	0	0			586.54
0	DG(16:0/16:0)+NH4	DG(32:0)+NH4	DG	(16:0/16:0)	(16:0)	(16:0)			586.541	C35 H72 O5 N1	0	0	0	0	0	0	0	0	0	0	0	0	0	0	0	0	0	0	0	0	0	0	0	0	0	0	0	4.30781e+07	0	11034.3	0	0	0	0	0	0
0	DG(16:0/16:0)+NH4	DG(32:0)+NH4	DG	(16:0/16:0)	(16:0)	(16:0)			586.541	C35 H72 O5 N1	0	0	0	0	0	78948.9	0	0	0	0	0	0	0	0	0	0	0	0	0	1.50218e+06	0	5.42421e+07	0	8.41328e+07	0	5.91528e+07	0	715576	0	0	0	0	0	135715	0	0
1	DG(16:0/16:0)+NH4	DG(32:0)+NH4	DG	(16:0/16:0)	(16:0)	(16:0)			586.541	C35 H72 O5 N1	0	0	0	0	0	0	0	0	0	0	0	112287	0	0	0	0	0	0	0	5.23767e+07	0	1119.64	0	416312	0	0	0	0	0	0	0	0	0	0	0	0
0	DG(16:0/16:0)+NH4	DG(32:0)+NH4	DG	(16:0/16:0)	(16:0)	(16:0)			586.541	C35 H72 O5 N1	0	0	0	0	0	0	0	0	0	0	0	0	0	0	0	0	0	0	0	0	0	1.33793e+06	0	554.083	0	0	0	0	0	0	0	0	0	0	0	3.12772e+07
0	DG(18:0/16:0)+NH4	DG(34:0)+NH4	DG	(18:0/16:0)	(18:0)	(16:0)			614.572	C37 H76 O5 N1	0	393241	0	7.28896e+06	0	4.66864e+06	0	2.75876e+06	0	60873.8	0	77648	0	0	4266.33	0	237335	0	0	0	0	0	0	0	0	0	0	0	0	0	0	0	0	0	0	0		614.572
0	DG(18:0/16:0)+NH4	DG(34:0)+NH4	DG	(18:0/16:0)	(18:0)	(16:0)			614.572	C37 H76 O5 N1	0	0	0	0	0	0	0	0	0	0	0	0	0	0	0	0	0	0	0	0	0	0	0	0	0	0	11791.5	0	3.42718e+06	0	3.20758e+06	0	182321	0	0	0
0	DG(18:0/16:0)+NH4	DG(34:0)+NH4	DG	(18:0/16:0)	(18:0)	(16:0)			614.572	C37 H76 O5 N1	0	0	0	0	0	0	0	0	0	0	0	0	0	0	0	0	0	0	45.032	0	0	0	213103	0	0	0	1.19797e+07	0	1639.6	0	274851	0	0	0	0	0
0	DG(18:0/16:0)+NH4	DG(34:0)+NH4	DG	(18:0/16:0)	(18:0)	(16:0)			614.572	C37 H76 O5 N1	0	0	0	0	0	0	0	0	0	0	0	0	0	0	0	0	0	0	0	0	424590	0	0	0	275581	0	0	0	0	0	0	0	7.01385e+06	0	76021.7	0
0	DG(18:0/16:0)+NH4	DG(34:0)+NH4	DG	(18:0/16:0)	(18:0)	(16:0)			614.572	C37 H76 O5 N1	5.72909e+06	0	1.01847e+07	0	6.61069e+06	0	1.28339e+07	0	40012.7	0	2.19296e+07	0	7.34908e+06	0	0	1.96562e+07	0	1.7984e+07	0	0	0	0	0	0	0	0	0	0	0	0	0	1.07622e+06	0	0	0	0	614.571		614.572
0	DG(18:0/16:0)+NH4	DG(34:0)+NH4	DG	(18:0/16:0)	(18:0)	(16:0)			614.572	C37 H76 O5 N1	0	0	1.15434e+06	0	937169	0	267319	0	0	0	4580.38	0	0	0	0	213860	0	775829	0	0	0	0	0	0	0	0	0	0	0	0	0	3.46916e+07	0	0	0	0			614.572
0	DG(18:0/16:0)+NH4	DG(34:0)+NH4	DG	(18:0/16:0)	(18:0)	(16:0)			614.572	C37 H76 O5 N1	0	0	302450	0	0	0	0	0	0	0	0	0	0	0	0	132793	0	0	0	0	0	0	0	0	0	0	0	0	0	7.71531e+07	0	323429	0	0	0	0			614.572
0	DG(18:0/16:0)+NH4	DG(34:0)+NH4	DG	(18:0/16:0)	(18:0)	(16:0)			614.572	C37 H76 O5 N1	0	0	0	0	0	0	0	0	0	0	0	0	0	0	0	0	0	0	0	620034	0	0	0	0	0	234871	0	1.06553e+08	0	0	0	0	0	0	0	50642.5
0	DG(18:0/16:0)+NH4	DG(34:0)+NH4	DG	(18:0/16:0)	(18:0)	(16:0)			614.572	C37 H76 O5 N1	0	0	0	0	0	0	0	108733	0	0	0	0	0	0	0	0	0	0	0	1.9184e+06	0	3.40709e+07	0	5.74767e+07	0	6.49702e+07	0	204691	0	11445.8	0	0	0	0	0	337152
0	DG(18:0/16:0)+NH4	DG(34:0)+NH4	DG	(18:0/16:0)	(18:0)	(16:0)			614.572	C37 H76 O5 N1	0	0	0	0	0	0	0	0	0	0	0	0	0	0	0	0	0	0	0	4.87051e+07	0	685301	0	18926.9	0	237703	0	0	0	0	0	0	0	0	0	311088
0	DG(16:0/18:1)+NH4	DG(34:1)+NH4	DG	(16:0/18:1)	(16:0)	(18:1)			612.556	C37 H74 O5 N1	0	0	0	0	0	0	0	0	0	0	0	0	0	0	0	0	0	0	94044.5	0	0	0	32811.9	0	0	0	2.62347e+06	0	2.124e+06	0	3.58504e+06	0	152494	0	0	0
0	DG(16:0/18:1)+NH4	DG(34:1)+NH4	DG	(16:0/18:1)	(16:0)	(18:1)			612.556	C37 H74 O5 N1	553474	0	2.63528e+07	0	9.59544e+06	0	7.91186e+06	0	1.3977e+06	0	1.60747e+06	0	1.29295e+06	0	0	861639	0	6.80989e+06	0	0	0	0	0	0	0	131961	0	0	0	0	0	0	0	0	0	0	612.556		612.556
0	DG(16:0/18:1)+NH4	DG(34:1)+NH4	DG	(16:0/18:1)	(16:0)	(18:1)			612.556	C37 H74 O5 N1	0	0	0	0	0	0	0	0	0	0	0	0	0	0	0	0	0	0	0	1286.1	0	0	0	0	0	0	0	0	0	0	0	1.668e+07	0	0	0	0
0	DG(16:0/18:1)+NH4	DG(34:1)+NH4	DG	(16:0/18:1)	(16:0)	(18:1)			612.556	C37 H74 O5 N1	0	0	0	0	0	0	0	0	0	0	0	0	0	0	0	0	0	0	0	0	0	0	0	0	0	0	0	0	0	1.2987e+08	0	0	0	0	0	0
0	DG(16:0/18:1)+NH4	DG(34:1)+NH4	DG	(16:0/18:1)	(16:0)	(18:1)			612.556	C37 H74 O5 N1	0	0	0	0	0	0	0	0	0	0	0	0	0	0	0	0	0	0	0	0	0	0	0	0	0	0	0	1.38361e+07	0	0	0	0	0	9545	0	0
0	DG(16:0/18:1)+NH4	DG(34:1)+NH4	DG	(16:0/18:1)	(16:0)	(18:1)			612.556	C37 H74 O5 N1	0	0	0	0	0	0	0	0	0	0	0	0	0	0	117456	0	0	0	0	0	0	9.2644e+07	0	1.59837e+08	0	1.10466e+08	72623.5	0	372203	0	0	0	0	0	0	0
0	DG(16:0/18:1)+NH4	DG(34:1)+NH4	DG	(16:0/18:1)	(16:0)	(18:1)			612.556	C37 H74 O5 N1	0	0	0	0	0	0	0	0	0	0	0	0	0	0	0	0	0	0	0	4.13542e+07	0	0	0	0	0	0	0	0	0	0	0	0	0	0	0	0
0	DG(16:0/18:1)+NH4	DG(34:1)+NH4	DG	(16:0/18:1)	(16:0)	(18:1)			612.556	C37 H74 O5 N1	0	0	0	0	0	0	0	0	0	0	0	0	0	0	0	0	0	0	0	0	0	0	0	0	0	3877.62	0	0	0	0	0	0	0	0	0	1.1845e+07
0	DG(34:1p)+H	DG(34:1p)+H	DG	(34:1p)	(34:1p)				579.535	C37 H71 O4	0	0	0	0	0	0	0	0	0	0	102415	0	0	0	0	1.92311e+06	0	1.59153e+06	0	0	0	0	0	0	0	0	0	0	0	0	0	0	0	0	0	0
0	DG(16:0/18:2)+NH4	DG(34:2)+NH4	DG	(16:0/18:2)	(16:0)	(18:2)			610.541	C37 H72 O5 N1	0	0	0	0	0	0	0	0	0	0	0	0	0	0	0	0	0	1.89941e+06	0	0	0	0	0	0	0	0	0	0	0	0	0	0	0	0	0	0
0	DG(18:0/18:0)+NH4	DG(36:0)+NH4	DG	(18:0/18:0)	(18:0)	(18:0)			642.603	C39 H80 O5 N1	0	3419.84	0	103961	0	2.23054e+06	0	2.52686e+06	0	0	0	3773.6	0	0	2492.11	0	9344.53	0	0	0	0	0	0	0	0	0	132957	0	94226.5	0	0	0	0	0	0	0		642.603
0	DG(18:0/18:0)+NH4	DG(36:0)+NH4	DG	(18:0/18:0)	(18:0)	(18:0)			642.603	C39 H80 O5 N1	0	1.73091e+06	0	1.68923e+07	0	0	0	85466.9	0	0	0	0	0	0	2.90758e+06	0	850959	0	0	0	0	0	0	0	0	0	0	0	0	0	114448	0	0	0	0	0		642.603
0	DG(18:0/18:0)+NH4	DG(36:0)+NH4	DG	(18:0/18:0)	(18:0)	(18:0)			642.603	C39 H80 O5 N1	0	0	0	0	0	0	0	0	0	0	0	0	0	0	0	0	0	0	0	0	0	0	34533.4	0	0	0	191914	0	5.90626e+06	0	1.01741e+07	0	72673.8	0	0	0
0	DG(18:0/18:0)+NH4	DG(36:0)+NH4	DG	(18:0/18:0)	(18:0)	(18:0)			642.603	C39 H80 O5 N1	0	0	0	0	0	0	0	0	0	0	0	0	0	0	0	0	0	0	85543.4	0	57500.5	0	51269.2	0	119756	0	1.1401e+07	0	0	0	47553.9	0	216888	0	446482	0
0	DG(18:0/18:0)+NH4	DG(36:0)+NH4	DG	(18:0/18:0)	(18:0)	(18:0)			642.603	C39 H80 O5 N1	3.40425e+06	0	1.67357e+07	0	1.38175e+07	0	1.07436e+07	0	5.28714e+06	0	2.56323e+07	0	8.13549e+06	0	0	3.92367e+07	0	1.56303e+07	0	0	0	0	0	228562	0	0	0	0	0	1.49153e+06	0	1.3662e+06	0	0	0	0	642.603		642.603
0	DG(18:0/18:0)+NH4	DG(36:0)+NH4	DG	(18:0/18:0)	(18:0)	(18:0)			642.603	C39 H80 O5 N1	0	0	104700	0	0	0	269389	0	267569	0	0	0	0	0	0	131197	0	882882	0	0	0	0	0	0	0	0	0	2.95224e+06	0	5.94094e+07	0	9.73751e+07	0	0	0	0
0	DG(18:0/18:0)+NH4	DG(36:0)+NH4	DG	(18:0/18:0)	(18:0)	(18:0)			642.603	C39 H80 O5 N1	0	0	0	0	0	0	0	0	0	0	0	0	0	0	0	0	0	0	0	0	0	3.12508e+06	0	10689.5	0	1.88261e+06	0	1.28357e+08	0	0	0	0	0	0	0	0
0	DG(18:0/18:0)+NH4	DG(36:0)+NH4	DG	(18:0/18:0)	(18:0)	(18:0)			642.603	C39 H80 O5 N1	0	0	0	0	0	0	0	86929.9	0	0	0	0	0	0	0	0	0	0	0	4.91606e+06	0	4.10987e+07	0	6.08314e+07	0	6.67902e+07	0	263165	0	0	0	0	60100.8	0	0	1.19951e+06
1	DG(18:0/18:0)+NH4	DG(36:0)+NH4	DG	(18:0/18:0)	(18:0)	(18:0)			642.603	C39 H80 O5 N1	0	0	0	0	0	0	0	87450	0	0	0	0	0	0	0	0	0	0	0	4.17267e+07	0	739953	0	6.27864e+07	0	241756	0	217729	0	0	0	0	60093.2	0	0	818166
0	DG(18:0/18:1)+NH4	DG(36:1)+NH4	DG	(18:0/18:1)	(18:0)	(18:1)			640.587	C39 H78 O5 N1	1.34857e+06	0	1.74206e+07	0	4.26626e+07	0	1.55119e+07	0	248738	0	2.52651e+07	0	0	0	0	595197	0	6.17742e+07	0	0	0	0	0	0	0	688013	0	0	0	0	0	183760	0	0	0	0	640.587		640.587
0	DG(18:0/18:1)+NH4	DG(36:1)+NH4	DG	(18:0/18:1)	(18:0)	(18:1)			640.587	C39 H78 O5 N1	0	0	124050	0	0	0	0	0	0	0	0	0	0	0	0	0	0	0	0	0	0	920640	0	856775	0	0	0	0	0	8.04007e+07	0	0	0	0	0	0			640.587
0	DG(18:0/18:1)+NH4	DG(36:1)+NH4	DG	(18:0/18:1)	(18:0)	(18:1)			640.587	C39 H78 O5 N1	0	0	0	0	0	0	0	0	0	0	0	0	0	0	0	0	0	0	0	12831.9	0	1.15186e+07	0	6.7321e+07	0	5.63088e+07	0	0	0	0	0	0	0	0	0	0
1	DG(18:1/18:1)+NH4	DG(36:2)+NH4	DG	(18:1/18:1)	(18:1)	(18:1)			638.572	C39 H76 O5 N1	0	0	0	0	0	0	0	0	0	0	0	0	0	0	0	0	0	0	0	0	0	0	0	0	0	0	28619.4	0	0	0	1.39009e+06	0	0	0	0	0
0	DG(18:1/18:1)+NH4	DG(36:2)+NH4	DG	(18:1/18:1)	(18:1)	(18:1)			638.572	C39 H76 O5 N1	820654	0	7.82477e+06	0	1.7562e+07	0	1.09524e+07	0	710113	0	9.6895e+06	0	348974	0	0	478118	0	2.11153e+07	0	0	72045.5	0	0	0	0	0	0	0	0	0	0	0	0	0	0	0	638.572		638.571
0	DG(18:1/18:1)+NH4	DG(36:2)+NH4	DG	(18:1/18:1)	(18:1)	(18:1)			638.572	C39 H76 O5 N1	0	0	0	0	0	0	0	0	0	0	0	0	0	0	0	0	0	0	0	0	0	0	0	0	0	0	0	0	0	3.04857e+07	0	0	0	0	0	0
0	DG(18:1/18:1)+NH4	DG(36:2)+NH4	DG	(18:1/18:1)	(18:1)	(18:1)			638.572	C39 H76 O5 N1	0	0	0	0	0	0	0	0	0	0	0	0	0	0	0	0	0	0	0	0	0	2.96226e+07	0	5.70862e+07	0	3.40333e+07	0	0	0	0	0	0	0	0	0	0
0	DG(16:0/20:4)+NH4	DG(36:4)+NH4	DG	(16:0/20:4)	(16:0)	(20:4)			634.541	C39 H72 O5 N1	135738	0	1.19055e+07	0	1.42031e+07	0	5.80232e+06	0	167858	0	1.2618e+07	0	0	0	0	0	0	2.96648e+07	0	0	0	0	0	0	0	0	0	186478	0	0	0	0	0	0	0	138855	634.54		634.54
0	DG(16:0/20:4)+NH4	DG(36:4)+NH4	DG	(16:0/20:4)	(16:0)	(20:4)			634.541	C39 H72 O5 N1	0	0	0	0	0	0	0	0	0	0	0	0	0	0	0	0	0	0	0	0	0	0	0	0	0	0	0	0	0	1.44823e+07	0	0	0	0	0	0
0	DG(16:0/20:4)+H	DG(36:4)+H	DG	(16:0/20:4)	(16:0)	(20:4)			617.514	C39 H69 O5	702361	0	9.51318e+06	0	1.4374e+07	0	1.07854e+07	0	483567	0	1.02593e+07	0	198787	0	0	133260	0	2.26615e+07	0	0	0	0	0	0	0	0	0	0	315065	0	0	0	0	0	0	0	617.514		617.511
0	DG(16:0/20:4)+NH4	DG(36:4)+NH4	DG	(16:0/20:4)	(16:0)	(20:4)			634.541	C39 H72 O5 N1	0	0	0	0	0	0	0	0	0	0	0	0	0	0	0	0	0	0	0	0	0	0	0	0	0	3.00421e+07	0	0	0	0	0	0	0	0	0	0
0	DG(16:0/20:4)+NH4	DG(36:4)+NH4	DG	(16:0/20:4)	(16:0)	(20:4)			634.541	C39 H72 O5 N1	0	0	0	0	0	0	0	0	0	0	0	0	0	0	0	0	0	0	0	1.02999e+07	0	1.58598e+07	0	4.34538e+07	0	0	0	0	0	0	0	0	0	0	0	0
0	DG(37:0p)+NH4	DG(37:0p)+NH4	DG	(37:0p)	(37:0p)				640.624	C40 H82 O4 N1	0	0	379285	0	3.47297e+06	0	2475.58	0	6698.24	0	5179.28	0	0	0	0	668178	0	6.7011e+06	0	62200.8	0	0	0	0	0	0	0	0	0	3.37082e+06	0	2284.89	0	0	0	662514			640.624
0	DG(16:0/22:0)+NH4	DG(38:0)+NH4	DG	(16:0/22:0)	(16:0)	(22:0)			670.634	C41 H84 O5 N1	0	0	0	0	0	0	0	0	0	0	0	0	0	0	0	0	0	0	0	0	0	0	0	0	0	0	0	3.91109e+06	0	1.66649e+07	0	0	0	0	0	0
0	DG(38:0p)+NH4	DG(38:0p)+NH4	DG	(38:0p)	(38:0p)				654.639	C41 H84 O4 N1	5.13395e+06	0	2.56171e+06	0	6.33748e+06	0	14713.4	0	518418	0	2.76437e+06	0	1.26638e+06	0	0	1237.18	0	1985.88	0	0	0	0	0	0	0	0	0	0	0	0	0	3624.81	0	0	0	0	654.638		654.639
0	DG(38:1e)+NH4	DG(38:1e)+NH4	DG	(38:1e)	(38:1e)				654.639	C41 H84 O4 N1	313384	0	1.31221e+06	0	6.66046e+06	0	6193.1	0	0	0	398361	0	0	0	0	295440	0	6.86126e+06	0	71889.3	0	0	0	0	0	0	0	6720.78	1626.4	2.56382e+06	0	4671.28	0	819.636	0	230115	654.639		654.639
0	DG(18:0/20:4)+NH4	DG(38:4)+NH4	DG	(18:0/20:4)	(18:0)	(20:4)			662.572	C41 H76 O5 N1	3.44447e+06	0	5.71366e+06	0	1.55278e+07	0	2.22462e+07	0	1.13597e+06	0	5.78762e+07	0	464607	0	0	103224	0	7.63742e+06	0	0	0	0	0	0	0	0	0	0	0	855404	0	166824	0	0	0	0	662.572		662.572
0	DG(18:0/20:4)+NH4	DG(38:4)+NH4	DG	(18:0/20:4)	(18:0)	(20:4)			662.572	C41 H76 O5 N1	0	0	0	0	0	0	0	0	0	0	0	0	0	0	0	0	0	0	0	0	0	0	0	0	0	0	0	0	0	0	0	1.91604e+07	0	0	0	0
0	DG(18:0/20:4)+NH4	DG(38:4)+NH4	DG	(18:0/20:4)	(18:0)	(20:4)			662.572	C41 H76 O5 N1	0	0	0	0	0	0	0	0	0	0	0	0	0	0	0	0	0	0	0	0	0	0	0	0	0	0	0	0	0	8.54701e+07	0	0	0	0	0	0
0	DG(18:0/20:4)+NH4	DG(38:4)+NH4	DG	(18:0/20:4)	(18:0)	(20:4)			662.572	C41 H76 O5 N1	0	0	0	0	0	0	0	0	0	0	0	0	0	0	0	0	0	0	0	906188	0	1.06708e+08	0	2.26524e+08	0	1.6743e+08	0	0	0	0	0	0	0	0	0	0
0	DG(18:0/20:4)+NH4	DG(38:4)+NH4	DG	(18:0/20:4)	(18:0)	(20:4)			662.572	C41 H76 O5 N1	0	0	0	0	0	0	0	0	0	0	0	0	0	0	0	0	0	0	0	6.13882e+07	0	0	0	0	0	0	0	0	0	0	0	0	0	0	0	0
0	DG(18:1/20:4)+NH4	DG(38:5)+NH4	DG	(18:1/20:4)	(18:1)	(20:4)			660.556	C41 H74 O5 N1	0	0	423361	0	4.70122e+06	0	134105	0	0	0	7.30371e+06	0	0	0	0	0	0	214671	0	0	0	0	0	0	0	0	0	0	0	0	0	0	0	0	0	0			660.556
0	DG(16:0/22:6)+NH4	DG(38:6)+NH4	DG	(16:0/22:6)	(16:0)	(22:6)			658.541	C41 H72 O5 N1	0	0	6.1344e+06	0	8.49397e+06	0	36463.4	0	0	0	7425.97	0	0	0	0	0	0	6.79891e+06	0	0	0	0	0	0	0	0	0	0	0	0	0	0	0	0	0	0			658.54
0	DG(16:0/22:6)+NH4	DG(38:6)+NH4	DG	(16:0/22:6)	(16:0)	(22:6)			658.541	C41 H72 O5 N1	0	0	0	0	0	0	0	0	0	0	0	0	0	0	0	0	0	0	0	0	0	0	0	0	0	0	0	0	0	1.51367e+07	0	5151.92	0	0	0	0
0	DG(18:1/22:0)+NH4	DG(40:1)+NH4	DG	(18:1/22:0)	(18:1)	(22:0)			696.65	C43 H86 O5 N1	0	0	202652	0	13290.6	0	0	0	0	0	521203	0	0	0	0	4704.56	0	7.97408e+06	0	0	0	0	0	0	0	0	0	0	0	0	0	0	0	0	0	0			696.65
0	DG(20:3/20:4)+H	DG(40:7)+H	DG	(20:3/20:4)	(20:3)	(20:4)			667.53	C43 H71 O5	2453.46	0	3.77127e+06	0	1.76711e+06	0	0	0	0	0	673611	0	0	0	0	0	0	4.17685e+07	0	0	0	0	0	0	0	0	0	0	0	0	0	0	0	0	0	0	667.53		667.53
0	DG(20:3/20:4)+H	DG(40:7)+H	DG	(20:3/20:4)	(20:3)	(20:4)			667.53	C43 H71 O5	0	0	0	0	0	0	0	0	0	0	0	0	0	0	0	0	0	0	0	0	0	0	0	0	0	0	0	0	0	1.94998e+07	0	0	0	0	0	0
0	DG(18:1/24:0)+NH4	DG(42:1)+NH4	DG	(18:1/24:0)	(18:1)	(24:0)			724.681	C45 H90 O5 N1	236450	0	3.31284e+06	0	5.33728e+06	0	761612	0	0	0	5.44111e+06	0	0	0	0	0	0	370883	0	0	0	162608	0	0	0	0	0	0	0	4320.49	0	417544	0	0	0	0	724.681		724.681
0	DG(18:1/24:0)+NH4	DG(42:1)+NH4	DG	(18:1/24:0)	(18:1)	(24:0)			724.681	C45 H90 O5 N1	0	0	0	0	0	0	0	0	0	0	0	0	0	2465.2	0	0	0	0	0	751211	0	3.31216e+06	0	0	0	7.47077e+06	0	0	0	0	0	0	0	0	0	0
0	DG(45:1)+NH4	DG(45:1)+NH4	DG	(45:1)	(45:1)				766.728	C48 H96 O5 N1	6675.87	0	13939	0	354321	0	259450	0	8758.43	0	6721.74	0	173179	0	0	198929	0	630571	0	0	0	0	0	0	0	673.281	0	482851	0	0	0	0	0	0	0	0	766.728		766.728
0	GD1a(d16:0/20:1)-2H	GD1a(d36:1)-2H	GD1a	(d16:0/20:1)	(d16:0)	(20:1)			917.479	C84 H146 O39 N4	2450.51	0	4.79541e+06	0	6.43462e+06	0	76750.2	0	330241	0	1.46181e+07	0	0	0	0	0	0	4.79756e+06	0	0	0	0	0	0	0	0	0	0	0	0	0	0	0	0	0	0	917.479		917.479
1	GD1a(d36:1)-2H	GD1a(d36:1)-2H	GD1a	(d36:1)	(d36:1)				917.479	C84 H146 O39 N4	0	0	0	0	0	0	0	0	0	0	0	0	0	0	0	0	0	0	0	0	0	0	0	0	0	0	0	0	0	457826	0	0	0	0	0	0
0	GD1a(d16:0/20:1)-2H	GD1a(d36:1)-2H	GD1a	(d16:0/20:1)	(d16:0)	(20:1)			917.479	C84 H146 O39 N4	0	0	0	0	0	0	0	0	0	0	0	0	0	0	0	0	0	0	0	0	0	0	0	0	0	5.07961e+06	0	60885.6	0	0	0	0	0	0	0	0
0	GD1b(d16:0/20:1)-2H	GD1b(d36:1)-2H	GD1b	(d16:0/20:1)	(d16:0)	(20:1)			917.479	C84 H146 O39 N4	139504	0	5.56511e+06	0	6.44557e+06	0	1059.78	0	2999.99	0	1.38979e+07	0	0	0	0	0	0	4.36133e+06	0	0	0	0	0	0	0	0	0	0	0	0	0	0	0	0	0	0	917.479		917.481
0	LPC(16:0)+HCOO	LPC(16:0)+HCOO	LPC	(16:0)	(16:0)				540.331	C25 H51 O9 N1 P1	1.67844e+06	0	1.90372e+07	0	1.87755e+07	0	2.4317e+07	0	848777	0	1.72535e+07	0	139065	0	0	82304.3	0	3.75378e+07	0	0	0	0	0	0	0	0	0	0	0	0	0	3.2787e+06	0	0	0	0	540.331		540.331
0	LPC(16:0)+H	LPC(16:0)+H	LPC	(16:0)	(16:0)				496.34	C24 H51 O7 N1 P1	9.96839e+06	0	1.11186e+08	0	1.02656e+08	0	1.31378e+08	0	7.67749e+06	0	1.00015e+08	0	3.67093e+06	0	0	3.81025e+06	0	2.08385e+08	0	3.91685e+07	0	103994	0	1.74348e+06	0	1.67041e+08	0	0	0	0	0	1.67491e+07	0	0	0	7.1235e+06	496.34		496.34
0	LPC(16:0)+HCOO	LPC(16:0)+HCOO	LPC	(16:0)	(16:0)				540.331	C25 H51 O9 N1 P1	0	0	0	0	0	0	0	0	0	43280.4	0	0	0	0	0	0	0	0	0	0	0	0	0	0	0	0	0	0	0	1.17624e+07	0	1.27852e+07	0	0	0	0
0	LPC(16:0)+HCOO	LPC(16:0)+HCOO	LPC	(16:0)	(16:0)				540.331	C25 H51 O9 N1 P1	0	0	0	0	0	0	0	0	0	0	0	0	0	0	0	0	0	0	0	0	0	0	0	0	0	0	0	0	0	4.38929e+07	0	0	0	0	0	0
0	LPC(16:0)+H	LPC(16:0)+H	LPC	(16:0)	(16:0)				496.34	C24 H51 O7 N1 P1	0	0	0	0	0	0	0	0	0	0	0	141300	0	125454	0	0	0	0	17127	2.59434e+06	0	0	0	0	0	0	0	0	0	2.71017e+08	0	0	0	27822.6	0	1.39449e+08
0	LPC(16:0)+H	LPC(16:0)+H	LPC	(16:0)	(16:0)				496.34	C24 H51 O7 N1 P1	0	0	0	130332	0	0	0	0	0	0	0	1.26718e+06	0	3.56174e+06	0	0	2.36102e+06	0	0	15620.9	0	0	0	0	0	0	0	1.44636e+07	0	1.09209e+06	0	0	0	0	0	0
0	LPC(16:0)+H	LPC(16:0)+H	LPC	(16:0)	(16:0)				496.34	C24 H51 O7 N1 P1	0	292153	0	184596	0	0	0	110444	0	1.55757e+06	0	1.7005e+06	0	0	0	0	22202.4	749.354	0	0	0	0	0	0	0	3.02635e+07	0	0	0	0	0	0	0	0	0	0		496.34
0	LPC(16:0)+HCOO	LPC(16:0)+HCOO	LPC	(16:0)	(16:0)				540.331	C25 H51 O9 N1 P1	0	0	0	0	0	0	0	0	0	0	0	0	0	0	0	0	0	0	0	0	0	0	0	0	0	1.34189e+07	0	0	0	0	0	0	0	0	0	0
0	LPC(16:0)+HCOO	LPC(16:0)+HCOO	LPC	(16:0)	(16:0)				540.331	C25 H51 O9 N1 P1	0	0	0	0	0	0	0	0	0	0	0	0	0	0	0	0	0	0	0	2.1529e+06	0	1.73081e+07	0	3.16501e+07	0	0	0	0	0	0	0	0	0	0	0	0
0	LPC(16:0)+H	LPC(16:0)+H	LPC	(16:0)	(16:0)				496.34	C24 H51 O7 N1 P1	235305	0	132575	4.26197e+06	474364	0	2.40233e+06	0	368199	0	0	0	0	155331	612363	0	4.357e+07	672484	0	2.91142e+07	0	4.79616e+07	0	3.84333e+08	0	78563.3	0	203825	728995	0	0	0	0	0	0	0	496.34		496.34
0	LPC(16:0)+HCOO	LPC(16:0)+HCOO	LPC	(16:0)	(16:0)				540.331	C25 H51 O9 N1 P1	0	0	0	0	0	0	0	0	0	0	0	0	0	0	262.312	0	0	157.675	0	8.90698e+06	0	164357	0	40138.8	0	0	0	0	0	0	0	0	0	0	0	37590.2
0	LPC(16:0)+H	LPC(16:0)+H	LPC	(16:0)	(16:0)				496.34	C24 H51 O7 N1 P1	0	1.16606e+07	0	207603	4739.08	0	0	0	102733	0	0	0	0	0	0	4933.64	0	299195	0	1.1635e+08	0	1.14524e+06	0	121429	0	165550	0	0	3.6444e+06	0	1.00564e+06	0	0	0	0	4.06583e+06		496.34
0	LPC(16:0)+H	LPC(16:0)+H	LPC	(16:0)	(16:0)				496.34	C24 H51 O7 N1 P1	0	0	0	0	0	0	0	0	0	0	0	0	0	0	1.4535e+06	0	0	0	0	55811.1	0	5.90844e+06	0	7.41454e+06	0	0	0	0	53216.4	159812	63520.8	1587.65	0	2.89084e+07	0	1.8775e+07
0	LPC(16:0)+HCOO	LPC(16:0)+HCOO	LPC	(16:0)	(16:0)				540.331	C25 H51 O9 N1 P1	0	0	0	0	0	0	0	0	0	0	0	0	0	0	0	0	0	0	0	0	0	0	0	0	0	0	0	0	0	0	0	0	0	6.97914e+06	0	0
0	LPC(16:0)+H	LPC(16:0)+H	LPC	(16:0)	(16:0)				496.34	C24 H51 O7 N1 P1	0	0	0	0	0	1.80369e+06	0	130577	0	3.61132e+06	0	1.67999e+06	0	133205	0	0	33592.3	0	0	0	0	0	545497	0	0	0	0	0	0	0	0	0	45497.1	0	0	0
0	LPC(16:0)+H	LPC(16:0)+H	LPC	(16:0)	(16:0)				496.34	C24 H51 O7 N1 P1	0	139701	0	3.41463e+06	0	80.53	0	249005	0	48595.3	0	0	0	0	0	0	6.87736e+06	0	107995	0	2.36795e+06	0	0	0	914.977	0	56162.6	0	0	0	0	0	0	0	4.59572e+06	0		496.34
0	LPC(16:0)+H	LPC(16:0)+H	LPC	(16:0)	(16:0)				496.34	C24 H51 O7 N1 P1	0	563218	0	0	0	0	0	0	0	0	0	0	0	0	0	0	0	0	0	0	0	0	0	263484	0	0	54701.3	0	0	0	0	0	2.28805e+07	0	0	0		496.339
0	LPC(16:0)+H	LPC(16:0)+H	LPC	(16:0)	(16:0)				496.34	C24 H51 O7 N1 P1	0	0	0	0	0	0	0	0	0	0	0	0	0	0	118106	0	0	0	0	0	0	0	0	0	0	0	0	0	3.62611e+06	0	738070	0	0	0	0	0
0	LPC(16:0)+H	LPC(16:0)+H	LPC	(16:0)	(16:0)				496.34	C24 H51 O7 N1 P1	0	0	0	0	0	0	0	0	0	0	0	0	0	0	0	0	0	0	265415	0	140348	0	6.29782e+06	0	292759	0	4.22741e+06	0	0	0	0	0	2.29701e+06	0	104119	0
0	LPC(16:0)+H	LPC(16:0)+H	LPC	(16:0)	(16:0)				496.34	C24 H51 O7 N1 P1	0	0	0	0	0	0	0	0	0	0	0	0	0	0	0	0	0	0	57499.3	0	22635.5	0	1269.77	0	0	0	278113	0	0	0	0	0	1.49284e+07	0	22077.5	0
0	LPC(18:0)+HCOO	LPC(18:0)+HCOO	LPC	(18:0)	(18:0)				568.362	C27 H55 O9 N1 P1	648331	0	1.5947e+07	0	1.47565e+07	0	1.60759e+07	18788.8	563669	0	1.29932e+07	0	0	0	0	0	0	2.68457e+07	0	0	0	0	0	0	0	0	0	0	0	0	0	696173	0	0	0	0	568.362		568.362
0	LPC(18:0)+H	LPC(18:0)+H	LPC	(18:0)	(18:0)				524.371	C26 H55 O7 N1 P1	5.54879e+06	0	7.74965e+07	0	7.43357e+07	0	8.14094e+07	0	81897.6	0	6.87228e+07	17718.2	1.7014e+06	12486.6	0	2.69338e+06	0	1.41198e+08	0	2.7879e+06	0	3.13083e+06	0	662283	0	0	0	0	0	0	0	4.75349e+06	0	0	0	100072	524.371		524.371
0	LPC(18:0)+HCOO	LPC(18:0)+HCOO	LPC	(18:0)	(18:0)				568.362	C27 H55 O9 N1 P1	0	0	0	0	0	0	0	0	0	0	0	0	0	0	0	0	0	0	0	0	0	0	0	0	0	0	0	0	0	244154	0	6.24025e+06	0	0	0	0
0	LPC(18:0)+H	LPC(18:0)+H	LPC	(18:0)	(18:0)				524.371	C26 H55 O7 N1 P1	3216.72	0	4690.3	0	0	0	263268	0	106235	0	9623.61	9442.58	560441	0	0	33986.8	1113.2	247930	0	146132	0	0	0	0	0	0	0	0	0	868941	0	3.5447e+07	0	0	0	1.06606e+06	524.371		524.371
0	LPC(18:0)+HCOO	LPC(18:0)+HCOO	LPC	(18:0)	(18:0)				568.362	C27 H55 O9 N1 P1	0	0	0	0	0	0	0	0	0	0	0	0	0	0	0	0	0	0	0	0	0	0	0	0	0	0	0	0	0	2.80529e+07	0	0	0	0	0	0
0	LPC(18:0)+H	LPC(18:0)+H	LPC	(18:0)	(18:0)				524.371	C26 H55 O7 N1 P1	0	0	0	0	0	0	0	15193.6	0	0	0	0	0	0	0	54168.4	0	0	0	0	0	0	0	0	0	0	0	0	0	1.71313e+08	0	1.35984e+06	0	2471.09	0	0
0	LPC(18:0)+H	LPC(18:0)+H	LPC	(18:0)	(18:0)				524.371	C26 H55 O7 N1 P1	0	0	0	0	0	0	0	10740.8	0	135000	0	103808	0	0	26476.9	0	0	0	0	182731	0	197529	0	1.83483e+06	0	0	0	1.14299e+07	0	0	0	0	0	0	0	0
0	LPC(18:0)+HCOO	LPC(18:0)+HCOO	LPC	(18:0)	(18:0)				568.362	C27 H55 O9 N1 P1	0	0	0	0	0	0	0	0	0	0	0	0	0	0	0	0	0	0	0	0	0	0	0	0	0	8.88982e+06	0	0	0	0	0	0	0	0	0	0
0	LPC(18:0)+H	LPC(18:0)+H	LPC	(18:0)	(18:0)				524.371	C26 H55 O7 N1 P1	0	0	0	0	0	173.166	0	0	0	0	0	0	0	0	222.106	0	14327.9	0	0	0	0	0	0	1063.69	0	1.18433e+08	0	5001.88	12573.4	0	0	0	0	0	0	0
0	LPC(18:0)+HCOO	LPC(18:0)+HCOO	LPC	(18:0)	(18:0)				568.362	C27 H55 O9 N1 P1	0	0	0	0	0	0	0	0	0	0	0	0	0	0	0	0	0	0	0	3.39045e+06	0	8.11261e+06	0	1.443e+07	0	0	0	0	0	0	0	0	0	0	0	0
0	LPC(18:0)+H	LPC(18:0)+H	LPC	(18:0)	(18:0)				524.371	C26 H55 O7 N1 P1	0	44333.1	0	36600.8	0	0	0	0	0	0	0	0	0	0	0	0	12155.7	0	0	8.80375e+06	0	1.61488e+07	0	2.00295e+08	0	0	0	0	64027.9	0	280632	0	0	69040.8	0	0		524.371
0	LPC(18:0)+H	LPC(18:0)+H	LPC	(18:0)	(18:0)				524.371	C26 H55 O7 N1 P1	0	0	0	0	0	0	0	0	0	0	0	0	0	0	21333.5	0	0	0	0	132712	0	0	0	0	0	0	0	0	0	0	0	0	0	8169.98	0	1.04389e+07
0	LPC(18:0)+H	LPC(18:0)+H	LPC	(18:0)	(18:0)				524.371	C26 H55 O7 N1 P1	0	0	0	0	0	0	0	0	0	0	0	0	0	0	17137.1	0	0	0	4965.86	0	1128.45	0	0	0	0	0	60992.8	0	258951	0	433103	0	0	2.61336e+06	0	0
0	LPC(18:0)+H	LPC(18:0)+H	LPC	(18:0)	(18:0)				524.371	C26 H55 O7 N1 P1	0	0	0	0	0	1.17191e+06	0	0	0	554.035	0	0	0	0	0	0	0	0	0	0	0	0	0	0	0	0	0	0	0	0	0	0	158.512	0	36413.2	0
0	LPC(18:0)+H	LPC(18:0)+H	LPC	(18:0)	(18:0)				524.371	C26 H55 O7 N1 P1	0	1.54853e+06	0	1.07273e+07	0	0	0	0	0	0	0	0	0	0	0	0	1.46168e+06	0	0	0	0	0	0	0	0	0	0	0	0	0	0	0	0	0	0	0		524.371
0	LPC(18:0)+H	LPC(18:0)+H	LPC	(18:0)	(18:0)				524.371	C26 H55 O7 N1 P1	0	0	0	0	0	0	0	0	0	0	0	0	0	0	495966	0	0	0	0	0	0	0	0	0	0	0	0	0	6.805e+06	0	690361	0	0	0	0	0
0	LPC(18:0)+H	LPC(18:0)+H	LPC	(18:0)	(18:0)				524.371	C26 H55 O7 N1 P1	0	0	0	0	0	0	0	0	0	0	0	0	0	0	3.25287e+06	0	0	0	0	0	0	0	0	0	0	0	0	0	0	0	3.0886e+06	0	0	0	0	0
0	LPC(18:0)+H	LPC(18:0)+H	LPC	(18:0)	(18:0)				524.371	C26 H55 O7 N1 P1	0	0	0	0	0	0	0	0	0	0	0	0	0	0	0	0	0	0	2.8469e+06	0	741204	0	784565	0	0	0	6.76095e+06	0	0	0	0	0	3339.2	0	284536	0
0	LPC(18:1)+HCOO	LPC(18:1)+HCOO	LPC	(18:1)	(18:1)				566.346	C27 H53 O9 N1 P1	355253	0	4.94406e+06	0	5.21225e+06	0	9.49582e+06	0	0	0	363693	0	64391.2	0	0	0	0	9.32218e+06	0	0	0	0	0	0	0	0	0	0	0	0	0	1.47198e+06	0	0	0	0	566.346		566.347
0	LPC(18:1)+H	LPC(18:1)+H	LPC	(18:1)	(18:1)				522.355	C26 H53 O7 N1 P1	4.07077e+06	0	2.55948e+07	0	3.21071e+07	0	5.30695e+07	0	847511	0	2.81441e+07	0	486898	0	0	246245	0	5.23845e+07	0	0	0	96565	0	0	0	568759	0	117430	0	74087.5	0	9.62264e+06	62066.5	0	0	0	522.355		522.356
0	LPC(18:1)+HCOO	LPC(18:1)+HCOO	LPC	(18:1)	(18:1)				566.346	C27 H53 O9 N1 P1	0	0	0	0	0	0	0	0	0	0	0	0	0	0	0	0	0	0	0	0	0	0	0	0	0	0	0	0	0	3.01136e+06	0	4.88185e+06	0	0	0	0
0	LPC(18:1)+H	LPC(18:1)+H	LPC	(18:1)	(18:1)				522.355	C26 H53 O7 N1 P1	0	0	853.498	0	0	0	0	0	0	0	0	0	0	0	0	0	0	77345.6	0	0	0	0	0	0	0	0	0	0	0	4.41923e+07	0	3.04411e+07	0	0	0	0			522.355
0	LPC(18:1)+HCOO	LPC(18:1)+HCOO	LPC	(18:1)	(18:1)				566.346	C27 H53 O9 N1 P1	0	0	0	0	0	0	0	0	0	0	0	0	0	0	0	0	0	0	0	0	0	0	0	0	0	0	0	0	0	1.53865e+07	0	0	0	0	0	0
0	LPC(18:1)+H	LPC(18:1)+H	LPC	(18:1)	(18:1)				522.355	C26 H53 O7 N1 P1	0	0	0	0	0	0	21058.9	18661.8	0	0	0	0	0	0	0	13542.8	0	0	0	0	0	0	0	0	0	1849.67	0	0	0	8.67188e+07	0	0	0	782.252	0	0
0	LPC(18:1)+H	LPC(18:1)+H	LPC	(18:1)	(18:1)				522.355	C26 H53 O7 N1 P1	0	0	0	0	23826.2	0	0	0	0	0	0	0	0	0	0	0	0	0	0	0	0	0	0	0	0	0	0	5.7728e+06	0	0	0	0	0	0	0	0
0	LPC(18:1)+HCOO	LPC(18:1)+HCOO	LPC	(18:1)	(18:1)				566.346	C27 H53 O9 N1 P1	0	0	0	0	0	0	0	0	0	273.404	0	0	0	0	0	0	0	0	0	0	0	0	0	0	0	3.55564e+06	0	0	0	0	0	0	0	0	0	0
0	LPC(18:1)+H	LPC(18:1)+H	LPC	(18:1)	(18:1)				522.355	C26 H53 O7 N1 P1	0	0	0	0	0	0	0	0	0	0	0	0	0	167716	0	0	0	0	0	0	0	0	0	0	0	4.26385e+07	0	0	0	0	0	0	0	2414.17	0	0
0	LPC(18:1)+HCOO	LPC(18:1)+HCOO	LPC	(18:1)	(18:1)				566.346	C27 H53 O9 N1 P1	0	0	0	0	0	0	0	0	0	0	0	0	0	0	0	0	0	0	0	33590.9	0	7.86003e+06	0	1.4472e+07	0	0	0	0	0	0	0	1337.94	0	0	0	0
0	LPC(18:1)+H	LPC(18:1)+H	LPC	(18:1)	(18:1)				522.355	C26 H53 O7 N1 P1	0	0	0	0	0	48672.3	0	48387.2	0	0	0	0	56796.6	370960	0	0	0	0	0	689239	0	1.00591e+08	0	7.00469e+07	0	71121.5	0	52642.9	0	0	0	0	0	148657	0	201321
0	LPC(18:1)+HCOO	LPC(18:1)+HCOO	LPC	(18:1)	(18:1)				566.346	C27 H53 O9 N1 P1	0	0	0	0	0	0	0	0	0	0	0	0	0	0	0	0	0	0	0	3.59057e+06	0	58787	0	0	0	0	0	0	0	0	0	0	0	0	0	238.008
0	LPC(18:1)+H	LPC(18:1)+H	LPC	(18:1)	(18:1)				522.355	C26 H53 O7 N1 P1	0	0	0	69642.8	0	0	126838	0	0	0	32768.9	0	49982.9	0	0	0	43095.9	0	0	159547	0	107733	0	85603.4	0	0	0	0	0	0	0	0	0	1.79434e+07	0	6.95192e+06
0	LPC(18:1)+HCOO	LPC(18:1)+HCOO	LPC	(18:1)	(18:1)				566.346	C27 H53 O9 N1 P1	0	0	0	0	0	0	0	0	0	0	0	0	0	0	0	0	0	0	0	0	0	0	0	0	0	0	0	0	0	0	0	0	0	3.1311e+06	0	0
0	LPC(18:1)+H	LPC(18:1)+H	LPC	(18:1)	(18:1)				522.355	C26 H53 O7 N1 P1	0	46684.4	0	4.94217e+06	0	0	0	0	0	0	41504.9	0	0	27273.2	29931	0	8.35638e+06	0	0	0	0	0	0	0	0	0	0	0	0	0	49642.8	0	0	198586	0	0
0	LPC(18:1)+H	LPC(18:1)+H	LPC	(18:1)	(18:1)				522.355	C26 H53 O7 N1 P1	0	0	0	0	0	108565	0	39502.3	0	39211.1	0	63851.4	38199.1	61184.5	1.81284e+06	0	0	0	0	0	0	0	0	0	0	0	0	168610	1.96331e+06	0	1.93395e+06	0	23675.9	26836.8	56208.5	0
0	LPC(18:1)+H	LPC(18:1)+H	LPC	(18:1)	(18:1)				522.355	C26 H53 O7 N1 P1	0	3197.06	0	0	0	0	775.793	0	0	0	0	0	0	0	0	0	1694.55	0	0	0	0	0	0	0	0	0	0	0	0	0	0	0	7.11224e+06	0	0	0		522.355
0	LPC(18:2)+H	LPC(18:2)+H	LPC	(18:2)	(18:2)				520.34	C26 H51 O7 N1 P1	0	0	37987.5	0	1048.37	0	1079.06	0	26702.8	0	93548.7	260617	0	172650	0	0	0	0	1.55883e+06	12350.8	313903	208856	23212.7	7.20675e+06	1.82664e+06	29235.3	1.68173e+06	0	477.063	0	0	0	0	13532.7	0	62225.7			520.34
0	LPC(18:3)+H	LPC(18:3)+H	LPC	(18:3)	(18:3)				518.324	C26 H49 O7 N1 P1	30369.1	7735.54	24116.8	0	682863	9427.1	2.12122e+06	0	25304.2	0	2.56561e+06	68653.8	28885.8	17413.5	0	21164.3	0	1292.51	0	0	0	0	0	56782	0	550.072	0	0	0	0	0	478.581	0	68737.8	0	49905.7	518.324	518.324	518.324
0	LPC(18:3)+H	LPC(18:3)+H	LPC	(18:3)	(18:3)				518.324	C26 H49 O7 N1 P1	22809.4	4275.27	481.011	8569.44	31564.1	6936.47	156769	0	28161.5	0	66086.7	0	170443	238.187	205.708	16525.1	593.041	33493.6	0	0	0	0	0	0	0	538.763	0	0	0	7.31781e+06	0	164792	0	698.014	0	0	518.324	518.324	518.324
0	LPC(18:3)+H	LPC(18:3)+H	LPC	(18:3)	(18:3)				518.324	C26 H49 O7 N1 P1	0	60.625	21486.1	235.847	52585.6	0	0	18356.2	0	41962.8	16868.9	925.586	164443	0	0	65482.5	0	996.252	0	19870.9	0	316231	0	204042	0	5.59791e+06	0	61701.9	0	72277.9	0	49022.4	0	0	0	0		518.324	518.324
0	LPC(18:3)+H	LPC(18:3)+H	LPC	(18:3)	(18:3)				518.324	C26 H49 O7 N1 P1	215605	0	1649.17	8046.3	92003.7	45378.1	79625.3	35571.1	2315.31	42403.6	69869.2	0	99275.3	11028.9	0	63256.9	6159.91	0	17357	0	5091.99	5.55508e+06	0	1.33032e+07	0	30930.1	13308.8	767.488	0	0	18580.9	0	25181.2	1257.16	21587	106860	518.324		518.324
0	LPC(20:1)+H	LPC(20:1)+H	LPC	(20:1)	(20:1)				550.387	C28 H57 O7 N1 P1	1892.33	0	3.40826e+06	0	3.6065e+06	0	3.90055e+06	0	0	0	3.00189e+06	0	0	0	0	0	0	159301	0	0	0	0	0	6597.88	0	0	0	179361	0	0	0	3094.9	0	0	0	0	550.387		550.387
0	LPC(20:1)+H	LPC(20:1)+H	LPC	(20:1)	(20:1)				550.387	C28 H57 O7 N1 P1	0	0	0	0	0	0	0	0	0	0	0	0	0	0	0	0	0	0	0	0	0	0	0	0	0	0	0	0	0	7.49018e+06	0	0	0	0	0	0
0	LPC(20:1)+H	LPC(20:1)+H	LPC	(20:1)	(20:1)				550.387	C28 H57 O7 N1 P1	0	0	0	0	0	0	0	0	0	0	0	0	0	0	0	0	16619.4	0	0	3816.27	0	6.88369e+06	0	1.1694e+07	0	0	0	1.60416e+06	0	0	0	0	0	0	0	0
0	LPC(20:3)+H	LPC(20:3)+H	LPC	(20:3)	(20:3)				546.355	C28 H53 O7 N1 P1	0	427.355	5122.21	0	2.35136e+06	0	2.49607e+06	0	28622.6	0	3099.05	195.91	34053.1	0	0	1440.55	0	712909	0	0	0	40428.6	0	51324.8	0	0	0	1385.66	0	115652	0	970.519	0	0	0	309140		546.355	546.355
0	LPC(20:3)+H	LPC(20:3)+H	LPC	(20:3)	(20:3)				546.355	C28 H53 O7 N1 P1	0	0	176990	0	61283.2	0	84004.8	0	96849.4	95485.4	25320.9	0	55445.2	414.046	0	822.085	9784.18	0	0	0	0	0	0	0	2677.6	243.367	0	0	20949.4	7.58004e+06	0	0	0	0	0	208227			546.355
0	LPC(20:4)+HCOO	LPC(20:4)+HCOO	LPC	(20:4)	(20:4)				588.331	C29 H51 O9 N1 P1	0	0	576436	0	276733	0	1.76036e+06	0	30.409	0	129238	0	0	0	0	0	0	2.90874e+06	0	0	0	0	0	0	0	0	0	0	0	3992.92	0	0	0	0	0	0			588.331
0	LPC(20:4)+HCOO	LPC(20:4)+HCOO	LPC	(20:4)	(20:4)				588.331	C29 H51 O9 N1 P1	0	0	0	0	0	0	0	0	0	0	0	0	0	0	0	0	0	0	0	0	0	0	0	0	0	0	0	0	0	2.73859e+06	0	0	0	0	0	0
0	LPC(22:6)+HCOO	LPC(22:6)+HCOO	LPC	(22:6)	(22:6)				612.331	C31 H51 O9 N1 P1	0	0	1.26998e+06	0	952967	0	1.84149e+06	0	0	0	1.98326e+06	0	0	0	0	0	0	2.85993e+06	0	0	0	0	0	0	0	0	0	0	0	0	0	30983.3	0	0	0	0			612.331
0	LPC(22:6)+H	LPC(22:6)+H	LPC	(22:6)	(22:6)				568.34	C30 H51 O7 N1 P1	306418	0	4.51507e+06	0	4.99883e+06	0	1.28205e+07	0	0	0	8.17661e+06	0	314760	0	0	0	0	8.01427e+06	0	0	0	0	0	0	0	0	0	0	0	0	0	0	0	0	0	0	568.34		568.34
0	LPC(22:6)+HCOO	LPC(22:6)+HCOO	LPC	(22:6)	(22:6)				612.331	C31 H51 O9 N1 P1	0	0	0	0	0	0	0	0	0	0	0	0	0	0	0	0	0	0	0	0	0	0	0	0	0	0	0	0	0	2.44404e+06	0	0	0	0	0	0
0	LPC(22:6)+H	LPC(22:6)+H	LPC	(22:6)	(22:6)				568.34	C30 H51 O7 N1 P1	0	0	0	0	0	0	0	0	0	0	0	0	0	0	0	0	0	0	0	0	0	0	0	0	0	6.15165e+06	0	0	0	0	0	0	0	0	0	0
0	LPC(22:6)+H	LPC(22:6)+H	LPC	(22:6)	(22:6)				568.34	C30 H51 O7 N1 P1	0	0	0	0	0	0	0	0	0	0	0	0	0	0	33471.6	0	0	0	0	272856	0	1.51865e+07	0	3.0733e+07	0	0	0	0	0	0	0	0	0	0	0	0
0	LPC(22:6)+H	LPC(22:6)+H	LPC	(22:6)	(22:6)				568.34	C30 H51 O7 N1 P1	0	0	0	0	0	0	0	67540.6	0	161126	0	0	0	2004.49	0	0	0	0	0	0	0	0	0	0	0	0	0	0	0	0	0	0	0	8.0762e+06	0	0
0	LPE(16:0)-H	LPE(16:0)-H	LPE	(16:0)	(16:0)				452.278	C21 H43 O7 N1 P1	487802	0	7.52291e+06	0	9.91706e+06	0	1.00145e+07	0	0	0	5.96838e+06	0	91990.5	0	0	191879	0	1.33434e+07	0	0	0	0	0	0	0	0	0	0	0	0	0	778979	0	0	0	0	452.278		452.279
0	LPE(16:0)-H	LPE(16:0)-H	LPE	(16:0)	(16:0)				452.278	C21 H43 O7 N1 P1	0	0	0	0	0	0	0	0	0	0	0	0	0	0	0	0	0	0	0	0	0	0	0	0	0	0	0	0	0	4.0028e+06	0	5.50145e+06	0	0	0	0
0	LPE(16:0)-H	LPE(16:0)-H	LPE	(16:0)	(16:0)				452.278	C21 H43 O7 N1 P1	0	0	0	0	0	0	0	0	0	0	0	0	0	0	0	0	0	0	0	0	0	0	0	0	0	0	0	0	0	2.52263e+07	0	0	0	0	0	0
0	LPE(16:0)-H	LPE(16:0)-H	LPE	(16:0)	(16:0)				452.278	C21 H43 O7 N1 P1	0	0	0	0	0	0	0	0	0	0	0	0	0	0	0	0	0	0	0	0	0	0	0	0	0	5.83084e+06	0	0	0	0	0	0	0	0	0	0
0	LPE(16:0)-H	LPE(16:0)-H	LPE	(16:0)	(16:0)				452.278	C21 H43 O7 N1 P1	0	0	0	0	0	0	0	0	0	0	0	0	0	0	0	0	0	0	0	5.9593e+06	0	1.08685e+07	0	1.78155e+07	0	0	0	0	0	0	0	0	0	0	0	0
0	LPE(16:0)-H	LPE(16:0)-H	LPE	(16:0)	(16:0)				452.278	C21 H43 O7 N1 P1	0	0	0	0	0	0	0	0	0	0	0	0	0	0	0	0	0	0	0	0	0	0	283.42	0	0	0	0	0	0	0	0	0	0	6.4958e+06	0	0
0	LPE(16:0p)-H	LPE(16:0p)-H	LPE	(16:0p)	(16:0p)				436.283	C21 H43 O6 N1 P1	0	0	5.91577e+06	0	6.12278e+06	0	7.9985e+06	0	0	0	4.16633e+06	0	0	0	0	0	0	9.18762e+06	0	0	0	0	0	0	0	0	0	0	0	0	0	0	0	0	0	0			436.284
0	LPE(16:0p)-H	LPE(16:0p)-H	LPE	(16:0p)	(16:0p)				436.283	C21 H43 O6 N1 P1	0	0	0	0	0	0	0	0	0	0	0	0	0	0	0	0	0	0	0	0	0	0	0	0	0	0	0	0	0	1.45261e+07	0	0	0	0	0	0
0	LPE(16:0p)-H	LPE(16:0p)-H	LPE	(16:0p)	(16:0p)				436.283	C21 H43 O6 N1 P1	0	0	0	0	0	0	0	0	0	0	0	0	0	0	0	0	0	0	0	3.41454e+06	0	6.16774e+06	0	1.36129e+07	0	0	0	0	0	0	0	0	0	0	0	0
0	LPE(18:0)-H	LPE(18:0)-H	LPE	(18:0)	(18:0)				480.31	C23 H47 O7 N1 P1	1.19895e+06	0	2.5427e+07	0	3.00249e+07	0	3.25873e+07	0	659989	0	2.34628e+07	0	563000	0	0	83574	0	4.656e+07	0	0	0	0	17831.5	0	0	0	0	0	0	0	0	2.21649e+06	0	0	0	0	480.31		480.31
0	LPE(18:0)-H	LPE(18:0)-H	LPE	(18:0)	(18:0)				480.31	C23 H47 O7 N1 P1	0	0	0	0	0	0	0	0	0	0	0	0	0	0	0	0	0	0	0	0	0	0	0	0	0	0	0	0	0	269.221	0	1.62691e+07	0	0	0	0
0	LPE(18:0)-H	LPE(18:0)-H	LPE	(18:0)	(18:0)				480.31	C23 H47 O7 N1 P1	0	0	0	0	0	0	0	0	0	0	0	0	0	0	0	0	0	0	0	0	0	0	0	0	0	0	0	0	0	6.13844e+07	0	0	0	0	0	0
0	LPE(18:0)-H	LPE(18:0)-H	LPE	(18:0)	(18:0)				480.31	C23 H47 O7 N1 P1	0	0	0	0	0	0	0	0	0	0	0	0	0	0	0	0	0	0	0	0	0	0	0	0	0	1.63481e+07	0	0	0	0	0	0	0	0	0	0
0	LPE(18:0)-H	LPE(18:0)-H	LPE	(18:0)	(18:0)				480.31	C23 H47 O7 N1 P1	0	0	0	0	0	0	0	0	0	0	0	0	0	0	0	0	0	0	0	1.33862e+07	0	2.04952e+07	0	4.39266e+07	0	0	0	0	0	0	0	0	0	3348.07	0	136031
0	LPE(18:0)-H	LPE(18:0)-H	LPE	(18:0)	(18:0)				480.31	C23 H47 O7 N1 P1	0	0	0	0	0	0	0	0	0	0	0	0	0	0	0	0	0	0	0	0	0	0	0	0	0	0	0	0	0	0	0	0	0	1.65353e+06	0	0
0	LPE(18:0p)-H	LPE(18:0p)-H	LPE	(18:0p)	(18:0p)				464.315	C23 H47 O6 N1 P1	0	0	9.53588e+06	0	9.93052e+06	0	1.32626e+07	0	0	0	7.00837e+06	0	0	0	0	0	0	17487.2	0	0	0	0	0	0	0	0	0	0	0	0	0	0	0	0	0	0			464.315
0	LPE(18:0p)-H	LPE(18:0p)-H	LPE	(18:0p)	(18:0p)				464.315	C23 H47 O6 N1 P1	0	0	0	0	0	0	0	0	0	0	0	0	0	0	0	0	0	0	0	0	0	0	0	0	0	0	0	0	0	0	0	3.90111e+06	0	0	0	0
0	LPE(18:0p)-H	LPE(18:0p)-H	LPE	(18:0p)	(18:0p)				464.315	C23 H47 O6 N1 P1	0	0	0	0	0	0	0	0	0	0	0	0	0	0	0	0	0	0	0	0	0	0	0	0	0	0	0	0	0	2.05286e+07	0	0	0	0	0	0
0	LPE(18:0p)-H	LPE(18:0p)-H	LPE	(18:0p)	(18:0p)				464.315	C23 H47 O6 N1 P1	0	0	0	0	0	0	0	0	0	0	0	0	0	0	0	0	0	0	0	0	0	0	0	0	0	4.80666e+06	0	0	0	0	0	0	0	0	0	0
0	LPE(18:0p)-H	LPE(18:0p)-H	LPE	(18:0p)	(18:0p)				464.315	C23 H47 O6 N1 P1	0	0	0	0	0	0	0	0	0	0	0	0	0	0	0	0	0	0	0	0	0	8.23029e+06	0	1.62781e+07	0	0	0	0	0	0	0	0	0	0	0	0
0	LPE(18:1)-H	LPE(18:1)-H	LPE	(18:1)	(18:1)				478.294	C23 H45 O7 N1 P1	1.60164e+07	0	8.60263e+06	0	3.97768e+07	0	2.75053e+07	0	70685.4	0	1.43519e+07	0	272615	0	0	137833	0	5.47356e+07	0	0	0	0	0	0	0	0	0	0	0	0	0	47950.2	0	0	0	0	478.294		478.294
0	LPE(18:1)-H	LPE(18:1)-H	LPE	(18:1)	(18:1)				478.294	C23 H45 O7 N1 P1	0	0	0	0	0	0	0	0	0	0	0	0	0	0	0	0	0	0	0	0	0	0	0	0	0	0	0	0	0	6.19762e+07	0	1.36751e+07	0	0	0	0
0	LPE(18:1)-H	LPE(18:1)-H	LPE	(18:1)	(18:1)				478.294	C23 H45 O7 N1 P1	0	0	0	0	0	0	0	0	0	0	0	0	0	0	0	0	0	0	0	0	0	0	0	0	0	1.04879e+07	0	0	0	0	0	0	0	0	0	0
0	LPE(18:1)-H	LPE(18:1)-H	LPE	(18:1)	(18:1)				478.294	C23 H45 O7 N1 P1	0	0	0	0	0	0	0	0	0	0	0	0	0	0	0	0	0	0	0	1.69771e+07	0	4.64024e+07	0	6.3705e+07	0	0	0	0	0	0	0	0	0	0	0	427196
0	LPE(18:1)-H	LPE(18:1)-H	LPE	(18:1)	(18:1)				478.294	C23 H45 O7 N1 P1	0	0	0	0	0	0	0	0	0	0	0	0	0	0	0	0	0	0	0	0	0	0	0	0	0	0	0	0	0	0	0	0	0	2.08523e+07	0	0
0	LPE(18:1p)-H	LPE(18:1p)-H	LPE	(18:1p)	(18:1p)				462.299	C23 H45 O6 N1 P1	0	0	4.46651e+06	0	4.9781e+06	0	5.53241e+06	0	0	0	3.593e+06	0	0	0	0	0	0	6.05856e+06	0	0	0	0	0	0	0	0	0	0	0	0	0	0	0	0	0	0			462.299
0	LPE(18:1p)-H	LPE(18:1p)-H	LPE	(18:1p)	(18:1p)				462.299	C23 H45 O6 N1 P1	0	0	0	0	0	0	0	0	0	0	0	0	0	0	0	0	0	0	0	0	15784.1	0	0	0	0	0	0	0	0	1.23109e+07	0	0	0	0	0	0
0	LPE(18:1p)-H	LPE(18:1p)-H	LPE	(18:1p)	(18:1p)				462.299	C23 H45 O6 N1 P1	0	0	0	0	0	0	0	0	0	0	0	0	0	0	0	0	0	0	0	0	0	0	0	0	0	1.94366e+06	0	0	0	0	0	0	0	0	0	0
0	LPE(18:1p)-H	LPE(18:1p)-H	LPE	(18:1p)	(18:1p)				462.299	C23 H45 O6 N1 P1	0	0	0	0	0	0	0	0	0	0	0	0	0	0	0	0	0	0	0	14080.1	0	5.34134e+06	0	9.53291e+06	0	0	0	0	0	0	0	0	0	0	0	0
0	LPE(20:1)-H	LPE(20:1)-H	LPE	(20:1)	(20:1)				506.325	C25 H49 O7 N1 P1	3.7551e+06	0	1.48396e+06	0	1.11161e+07	0	11033.5	0	224965	0	3.61768e+06	0	238642	0	0	101316	0	1.7534e+07	0	0	19413.6	0	0	0	0	0	0	0	0	0	0	0	0	0	0	0	506.325		506.325
0	LPE(20:1)-H	LPE(20:1)-H	LPE	(20:1)	(20:1)				506.325	C25 H49 O7 N1 P1	0	0	0	0	0	0	0	0	0	0	0	0	0	0	0	0	0	0	0	0	0	0	0	0	0	0	0	0	0	0	0	2.93061e+06	0	0	0	0
0	LPE(20:1)-H	LPE(20:1)-H	LPE	(20:1)	(20:1)				506.325	C25 H49 O7 N1 P1	0	0	0	0	0	0	0	0	0	0	0	0	0	0	0	0	0	0	0	0	0	0	0	0	0	0	0	0	0	2.29978e+07	0	0	0	0	0	0
0	LPE(20:1)-H	LPE(20:1)-H	LPE	(20:1)	(20:1)				506.325	C25 H49 O7 N1 P1	0	0	0	0	0	0	0	0	0	0	0	0	0	0	0	0	0	0	0	0	0	0	0	0	0	2.17775e+06	0	0	0	0	0	0	0	0	0	0
0	LPE(20:1)-H	LPE(20:1)-H	LPE	(20:1)	(20:1)				506.325	C25 H49 O7 N1 P1	0	0	0	0	0	0	0	0	0	0	0	0	0	0	0	0	0	0	0	4.83303e+06	0	1.42618e+07	0	1.66599e+07	0	0	0	0	0	0	0	0	0	0	0	0
0	LPE(20:1)-H	LPE(20:1)-H	LPE	(20:1)	(20:1)				506.325	C25 H49 O7 N1 P1	0	0	0	0	0	0	0	0	0	0	0	0	0	0	0	0	0	0	0	0	0	0	0	0	0	0	0	0	0	0	0	0	0	1.78767e+06	0	0
0	LPE(20:3)-H	LPE(20:3)-H	LPE	(20:3)	(20:3)				502.294	C25 H45 O7 N1 P1	0	0	0	0	0	0	0	0	0	0	0	0	0	0	0	0	0	0	0	69711.3	0	3076.74	0	0	0	0	0	0	0	3.51085e+06	0	0	0	0	0	0
0	LPE(20:3)-H	LPE(20:3)-H	LPE	(20:3)	(20:3)				502.294	C25 H45 O7 N1 P1	0	0	0	0	0	0	0	0	0	0	0	0	0	0	0	0	0	0	0	0	0	1540.94	0	3.16717e+06	0	0	0	0	0	0	0	0	0	0	0	43400.2
0	LPE(20:4)-H	LPE(20:4)-H	LPE	(20:4)	(20:4)				500.278	C25 H43 O7 N1 P1	1.82627e+07	0	1.17479e+07	0	2.97951e+07	0	8.84744e+06	0	2.77767e+06	0	1.37204e+07	0	728878	0	0	1.02668e+06	0	6.2942e+07	0	0	0	0	0	0	0	0	0	0	0	0	0	3.99903e+06	0	0	0	0	500.279		500.279
0	LPE(20:4)-H	LPE(20:4)-H	LPE	(20:4)	(20:4)				500.278	C25 H43 O7 N1 P1	1.003e+06	0	2.26824e+06	0	1.56403e+06	0	0	0	0	0	0	0	0	0	0	1.83844e+06	0	88650.3	0	0	0	0	0	0	0	0	0	0	0	373642	0	1.98553e+07	0	0	0	0
0	LPE(20:4)-H	LPE(20:4)-H	LPE	(20:4)	(20:4)				500.278	C25 H43 O7 N1 P1	0	0	0	0	0	0	0	0	0	0	0	0	0	0	0	0	0	0	0	0	0	0	0	0	0	0	0	0	0	5.45804e+07	0	451161	0	0	0	0
0	LPE(20:4)-H	LPE(20:4)-H	LPE	(20:4)	(20:4)				500.278	C25 H43 O7 N1 P1	0	0	0	0	0	0	0	0	0	0	0	0	0	0	0	0	0	0	0	0	0	0	0	0	0	0	0	6.63365e+06	0	0	0	0	0	0	0	0
0	LPE(20:4)-H	LPE(20:4)-H	LPE	(20:4)	(20:4)				500.278	C25 H43 O7 N1 P1	0	0	0	0	0	0	0	0	0	0	0	0	0	0	0	0	0	0	0	0	0	0	0	0	0	9.94287e+06	0	0	0	0	0	0	0	0	0	0
0	LPE(20:4)-H	LPE(20:4)-H	LPE	(20:4)	(20:4)				500.278	C25 H43 O7 N1 P1	0	0	0	0	0	0	0	0	0	0	0	0	0	0	0	0	0	0	0	1.8751e+07	0	2.41185e+07	0	4.15413e+07	0	0	0	0	0	0	0	0	0	0	0	537844
0	LPE(20:4)-H	LPE(20:4)-H	LPE	(20:4)	(20:4)				500.278	C25 H43 O7 N1 P1	0	0	0	0	0	0	0	0	0	0	0	0	0	0	0	0	0	0	0	0	0	0	0	0	0	0	0	0	0	0	0	0	0	0	0	4.71697e+06
0	LPE(20:4)-H	LPE(20:4)-H	LPE	(20:4)	(20:4)				500.278	C25 H43 O7 N1 P1	0	0	0	0	0	0	0	0	0	0	0	0	0	0	0	0	0	0	0	0	0	0	0	0	0	0	0	0	0	0	0	0	0	2.71818e+07	0	0
0	LPE(22:4)-H	LPE(22:4)-H	LPE	(22:4)	(22:4)				528.31	C27 H47 O7 N1 P1	8.77898e+06	0	4.58023e+06	0	1.07904e+07	0	8.86896e+06	0	565801	0	4.28998e+06	0	765577	0	0	93996.2	0	2.70112e+07	0	0	0	0	0	62057.3	28735	0	0	0	0	0	0	165893	0	0	0	0	528.31		528.31
0	LPE(22:4)-H	LPE(22:4)-H	LPE	(22:4)	(22:4)				528.31	C27 H47 O7 N1 P1	0	0	0	0	0	0	0	0	0	0	0	0	0	0	0	0	0	0	0	0	0	0	0	0	0	0	0	0	0	0	0	8.6447e+06	0	0	0	0
0	LPE(22:4)-H	LPE(22:4)-H	LPE	(22:4)	(22:4)				528.31	C27 H47 O7 N1 P1	0	0	0	0	0	0	0	0	0	0	0	0	0	0	0	0	0	0	0	0	0	0	0	0	0	0	0	0	0	2.72331e+07	0	0	0	0	0	0
0	LPE(22:4)-H	LPE(22:4)-H	LPE	(22:4)	(22:4)				528.31	C27 H47 O7 N1 P1	0	0	0	0	0	0	0	0	0	1307.86	0	0	0	0	0	0	0	0	0	0	0	0	0	0	0	4.0091e+06	0	0	0	0	0	0	0	0	0	0
0	LPE(22:4)-H	LPE(22:4)-H	LPE	(22:4)	(22:4)				528.31	C27 H47 O7 N1 P1	0	0	0	0	0	0	0	0	0	0	0	0	0	16800.3	0	0	0	0	0	8.18381e+06	0	1.42226e+07	0	1.92791e+07	0	0	0	0	0	0	0	0	0	0	0	113285
0	LPE(22:4)-H	LPE(22:4)-H	LPE	(22:4)	(22:4)				528.31	C27 H47 O7 N1 P1	0	0	0	0	0	0	0	0	0	0	0	0	0	0	0	0	0	0	0	0	0	0	0	0	0	0	0	0	0	0	0	0	0	0	0	1.76472e+06
0	LPE(22:4)-H	LPE(22:4)-H	LPE	(22:4)	(22:4)				528.31	C27 H47 O7 N1 P1	0	0	0	0	0	0	0	0	0	0	0	0	0	0	0	0	0	0	0	0	0	0	0	0	0	0	0	0	0	0	0	0	0	1.02159e+07	0	0
0	LPE(22:6)-H	LPE(22:6)-H	LPE	(22:6)	(22:6)				524.278	C27 H43 O7 N1 P1	3.19591e+07	0	3.08365e+07	0	1.06421e+08	0	6.11634e+07	0	5.18018e+06	0	3.54208e+07	0	1.12068e+07	0	0	1.05755e+06	0	1.48348e+08	0	0	0	0	0	0	0	0	0	0	0	0	0	1.59535e+07	0	6708.4	0	0	524.278		524.278
0	LPE(22:6)+H	LPE(22:6)+H	LPE	(22:6)	(22:6)				526.293	C27 H45 O7 N1 P1	4.46208e+07	0	5.17121e+07	0	1.46096e+08	0	2.12135e+07	0	1.11365e+06	0	4.64736e+07	0	8.87055e+06	0	0	752374	0	1.77248e+08	0	0	0	0	0	9.7693e+06	167323	18006	0	0	19088.3	0	0	1.02525e+07	0	27076.5	0	0	526.293		526.292
0	LPE(22:6)-H	LPE(22:6)-H	LPE	(22:6)	(22:6)				524.278	C27 H43 O7 N1 P1	4.65075e+06	0	7.40745e+06	0	7.24565e+06	0	189702	0	55476	0	187782	0	98377.8	0	0	4.91398e+06	0	3.43315e+07	0	0	0	0	0	0	0	0	0	67109.5	0	1.03506e+08	0	5.2195e+07	0	0	0	0
0	LPE(22:6)+H	LPE(22:6)+H	LPE	(22:6)	(22:6)				526.293	C27 H45 O7 N1 P1	315007	0	31119.4	0	430435	0	50405.8	0	0	28498	55178.6	13433.7	23723.6	0	0	4.22303e+06	0	1.92843e+07	0	0	0	48387.3	0	54331.9	0	46834.8	0	0	22970.5	1.12341e+08	0	3.75581e+07	0	50195.5	0	0			526.293
0	LPE(22:6)-H	LPE(22:6)-H	LPE	(22:6)	(22:6)				524.278	C27 H43 O7 N1 P1	0	0	0	205980	0	0	0	0	0	0	0	0	0	0	0	0	0	0	0	0	0	0	0	0	0	0	0	1.43998e+07	0	0	0	0	0	0	0	0
0	LPE(22:6)+H	LPE(22:6)+H	LPE	(22:6)	(22:6)				526.293	C27 H45 O7 N1 P1	355.069	148652	0	102101	51947.2	0	0	0	0	0	895.747	0	0	0	0	0	0	1086.47	0	0	0	0	0	0	0	0	0	2.71868e+07	0	0	0	17600.6	0	0	0	0	526.293	526.293
0	LPE(22:6)-H	LPE(22:6)-H	LPE	(22:6)	(22:6)				524.278	C27 H43 O7 N1 P1	0	0	0	0	0	0	0	0	0	0	0	0	0	0	0	0	0	0	0	0	0	0	0	0	0	8.00977e+06	0	0	0	0	0	0	0	0	0	0
0	LPE(22:6)+H	LPE(22:6)+H	LPE	(22:6)	(22:6)				526.293	C27 H45 O7 N1 P1	22278.6	0	25550.8	0	19991.9	0	26289.2	0	27405.3	0	10730.1	0	42902.2	0	411637	41417.3	0	125844	0	0	5291.04	560148	0	0	0	1.77099e+07	0	56548	2.61902e+06	0	775452	0	0	0	0	0			526.293
0	LPE(22:6)-H	LPE(22:6)-H	LPE	(22:6)	(22:6)				524.278	C27 H43 O7 N1 P1	0	0	223503	0	0	0	0	0	0	0	0	0	0	0	0	0	0	92088.1	0	7.4011e+06	0	4.68298e+07	0	2.62222e+07	0	0	0	0	0	0	0	0	0	0	0	0			524.278
0	LPE(22:6)+H	LPE(22:6)+H	LPE	(22:6)	(22:6)				526.293	C27 H45 O7 N1 P1	0	0	643767	0	924905	0	1.011e+06	0	83536	0	824281	0	67051.3	0	0	0	0	1.41631e+06	266701	2.89198e+07	336510	3.03004e+07	1.68276e+06	5.02166e+07	359860	42794.5	1.47254e+06	39992.3	0	670309	0	109857	0	0	0	3.83689e+06			526.293
1	LPE(22:6)-H	LPE(22:6)-H	LPE	(22:6)	(22:6)				524.278	C27 H43 O7 N1 P1	0	0	123938	0	0	0	0	0	0	0	0	0	0	0	0	0	0	89382.5	0	3.62471e+07	0	4.44979e+07	0	3.72312e+07	0	0	0	0	0	0	0	0	0	0	0	932668			524.278
0	LPE(22:6)-H	LPE(22:6)-H	LPE	(22:6)	(22:6)				524.278	C27 H43 O7 N1 P1	0	0	0	0	0	0	0	0	0	0	0	0	0	0	0	0	0	0	0	0	0	0	0	0	0	0	0	0	0	0	0	0	0	0	0	1.07847e+07
0	LPE(22:6)+H	LPE(22:6)+H	LPE	(22:6)	(22:6)				526.293	C27 H45 O7 N1 P1	0	0	0	0	0	0	49547.9	658009	0	0	0	1.3165e+06	36950.8	0	0	0	0	0	0	77842.5	0	50863	0	136491	13702.9	54683	0	0	0	0	10723.3	0	0	3.07062e+07	0	3.08321e+07
0	LPE(22:6)-H	LPE(22:6)-H	LPE	(22:6)	(22:6)				524.278	C27 H43 O7 N1 P1	0	0	0	0	0	0	0	0	0	0	0	0	0	0	0	0	0	0	0	0	0	0	0	0	0	0	0	0	0	0	0	0	0	5.74535e+07	0	0
0	LPE(22:6)+H	LPE(22:6)+H	LPE	(22:6)	(22:6)				526.293	C27 H45 O7 N1 P1	0	0	0	0	0	1.1289e+06	0	0	42610	0	0	0	0	0	0	41463	0	0	0	0	0	0	0	0	0	0	0	0	0	0	0	0	0	0	0	0
0	LPE(22:6)-H	LPE(22:6)-H	LPE	(22:6)	(22:6)				524.278	C27 H43 O7 N1 P1	0	0	0	1.06808e+06	0	0	0	0	0	0	0	0	0	0	0	0	165097	0	0	0	0	0	0	0	0	0	0	0	0	0	0	0	0	0	0	0
0	LPE(22:6)-H	LPE(22:6)-H	LPE	(22:6)	(22:6)				524.278	C27 H43 O7 N1 P1	0	0	0	0	0	0	0	0	0	0	0	0	0	0	435631	0	0	0	0	0	0	52421.3	0	0	0	0	0	0	1.27497e+06	0	55982.8	0	0	0	0	0
0	LPE(22:6)+H	LPE(22:6)+H	LPE	(22:6)	(22:6)				526.293	C27 H45 O7 N1 P1	0	0	0	0	0	0	0	0	0	0	0	0	0	0	100865	0	0	0	0	0	0	0	0	0	0	0	0	0	559174	0	4619.9	0	0	0	0	0
0	LPE(22:6)-H	LPE(22:6)-H	LPE	(22:6)	(22:6)				524.278	C27 H43 O7 N1 P1	0	0	0	0	0	0	0	0	0	0	0	0	0	0	0	0	0	0	934715	0	365065	0	18066.5	0	0	0	828439	0	0	0	0	0	0	0	19769.7	0
0	LPE(22:6)+H	LPE(22:6)+H	LPE	(22:6)	(22:6)				526.293	C27 H45 O7 N1 P1	0	65602.8	0	0	0	56685.6	0	0	0	0	0	0	0	0	0	0	0	0	135596	0	711391	78592.6	616347	0	0	0	1.61432e+06	0	0	0	0	0	0	0	170191	0		526.293
0	LPE(22:6)-H	LPE(22:6)-H	LPE	(22:6)	(22:6)				524.278	C27 H43 O7 N1 P1	0	0	0	0	0	0	0	0	0	0	0	0	0	0	0	0	0	0	0	0	0	0	0	0	0	0	0	0	0	0	0	0	2.49311e+06	0	0	0
0	LPE(22:6)+H	LPE(22:6)+H	LPE	(22:6)	(22:6)				526.293	C27 H45 O7 N1 P1	0	0	0	0	0	0	0	0	0	0	0	0	0	0	0	0	0	0	0	0	0	0	0	0	0	0	0	0	0	0	0	0	504614	0	0	0
0	LPI(18:0)-H	LPI(18:0)-H	LPI	(18:0)	(18:0)				599.32	C27 H52 O12 N0 P1	170789	0	4951.59	0	3.11155e+06	0	3.34438e+06	0	130161	0	2.00917e+06	0	0	0	0	0	0	8.54238e+06	0	0	0	0	0	0	0	0	0	0	0	0	0	73875.4	0	0	0	0	599.32		599.321
0	LPI(18:0)-H	LPI(18:0)-H	LPI	(18:0)	(18:0)				599.32	C27 H52 O12 N0 P1	0	0	0	0	0	0	0	0	0	0	0	0	0	0	0	0	0	0	0	0	0	0	0	0	0	0	0	0	0	0	0	2.23852e+06	0	0	0	0
0	LPI(18:0)-H	LPI(18:0)-H	LPI	(18:0)	(18:0)				599.32	C27 H52 O12 N0 P1	0	0	0	0	0	0	0	0	0	0	0	0	0	0	0	0	0	0	0	0	0	0	0	0	0	0	0	0	0	7.10117e+06	0	0	0	0	0	0
0	LPI(18:0)-H	LPI(18:0)-H	LPI	(18:0)	(18:0)				599.32	C27 H52 O12 N0 P1	0	0	0	0	0	0	0	0	0	0	0	0	0	0	0	0	0	0	0	0	0	0	0	0	0	2.08554e+06	0	0	0	0	0	0	0	0	0	0
0	LPI(18:0)-H	LPI(18:0)-H	LPI	(18:0)	(18:0)				599.32	C27 H52 O12 N0 P1	0	0	0	0	0	0	0	0	0	0	0	0	0	0	0	0	0	0	0	31973.9	0	1705.02	0	3.38327e+06	0	0	0	0	0	0	0	0	0	0	0	0
0	LPI(20:4)-H	LPI(20:4)-H	LPI	(20:4)	(20:4)				619.289	C29 H48 O12 N0 P1	0	0	2.2015e+06	0	603791	0	673777	0	0	0	153719	0	0	0	0	64497.3	0	1.1683e+06	0	0	0	0	0	0	0	0	0	0	0	0	0	0	0	0	0	0			619.289
0	LPS(18:0)-H	LPS(18:0)-H	LPS	(18:0)	(18:0)				524.299	C24 H47 O9 N1 P1	0	0	89365.4	0	5854.04	0	6.0257e+06	0	0	0	329874	0	0	0	0	0	0	500014	0	0	0	0	0	0	0	3417.78	0	0	0	0	0	0	0	0	0	0			524.299
0	LPS(18:0)+H	LPS(18:0)+H	LPS	(18:0)	(18:0)				526.314	C24 H49 O9 N1 P1	1519.31	0	1.1499e+06	0	1.93955e+06	0	6.11849e+06	0	0	0	1.11693e+06	0	0	0	0	29666.2	0	6759.76	0	0	0	0	0	0	0	20949.8	0	0	0	0	0	99498.1	0	28895.6	7239.93	0	526.314		526.314
0	LPS(18:0)-H	LPS(18:0)-H	LPS	(18:0)	(18:0)				524.299	C24 H47 O9 N1 P1	0	0	0	0	0	0	0	0	0	0	0	0	0	0	0	0	0	0	0	0	0	0	0	0	0	0	0	0	0	0	0	3.54369e+06	0	0	0	0
0	LPS(18:0)-H	LPS(18:0)-H	LPS	(18:0)	(18:0)				524.299	C24 H47 O9 N1 P1	0	0	0	0	0	0	0	0	0	0	0	0	0	0	0	0	0	0	0	0	0	876.539	0	798779	0	0	0	0	0	6.79288e+06	0	0	0	0	0	0
0	LPS(18:0)+H	LPS(18:0)+H	LPS	(18:0)	(18:0)				526.314	C24 H49 O9 N1 P1	0	0	0	0	0	0	0	0	0	0	0	0	0	0	0	0	0	0	0	0	0	99409.1	0	258195	0	0	0	0	0	6.82805e+06	0	0	0	0	0	0
0	LPS(18:0)-H	LPS(18:0)-H	LPS	(18:0)	(18:0)				524.299	C24 H47 O9 N1 P1	0	0	0	0	0	0	0	0	0	0	0	0	0	0	0	0	0	0	0	30075.7	0	3.48766e+06	0	8.27524e+06	0	0	0	0	0	0	0	0	0	0	0	0
0	LPS(18:0)+H	LPS(18:0)+H	LPS	(18:0)	(18:0)				526.314	C24 H49 O9 N1 P1	0	0	0	0	0	0	0	0	0	0	0	0	0	0	0	0	42127.6	0	0	794402	0	8.25649e+06	0	1.07589e+07	0	0	0	0	0	0	0	0	0	0	0	0
0	MG(16:0)+NH4	MG(16:0)+NH4	MG	(16:0)	(16:0)				348.311	C19 H42 O4 N1	0	582.921	0	0	0	0	0	0	0	0	0	755388	0	2.71336e+06	2020.91	0	88150.2	0	0	0	0	0	0	0	0	0	0	0	0	0	34258.9	0	0	0	0	0		348.311
0	MG(16:0)+H	MG(16:0)+H	MG	(16:0)	(16:0)				331.284	C19 H39 O4	0	0	0	0	0	1.56966e+06	0	170561	0	682164	0	0	0	0	0	0	0	0	0	0	0	0	0	0	0	0	0	0	0	0	0	0	0	0	0	0
0	MG(16:0)+NH4	MG(16:0)+NH4	MG	(16:0)	(16:0)				348.311	C19 H42 O4 N1	158191	0	0	0	0	1.23986e+06	0	8.24317e+06	0	3.22246e+06	0	206351	0	124376	0	0	0	196334	0	0	0	0	0	0	32122.1	0	0	0	362701	0	0	0	0	0	0	0	348.311
0	MG(16:0)+H	MG(16:0)+H	MG	(16:0)	(16:0)				331.284	C19 H39 O4	0	34803.8	0	143238	0	0	0	0	0	0	0	0	0	0	0	0	1.33917e+06	0	0	0	0	0	0	0	0	0	0	0	0	0	0	0	0	0	0	0		331.284
0	MG(16:0)+NH4	MG(16:0)+NH4	MG	(16:0)	(16:0)				348.311	C19 H42 O4 N1	0	4.40303e+06	0	1.57778e+06	0	254897	0	0	0	181167	192706	0	0	0	84381.7	0	5.88453e+06	0	0	0	46348	0	0	197018	0	0	0	0	35607.6	294905	233109	0	50111.7	41172.5	0	0		348.31
0	MG(16:0)+H	MG(16:0)+H	MG	(16:0)	(16:0)				331.284	C19 H39 O4	0	0	0	0	0	0	7213.47	0	0	0	0	0	0	0	838078	0	0	0	0	0	0	0	0	0	0	0	0	0	2.80505e+06	0	79890.8	276261	0	0	0	0
0	MG(16:0)+NH4	MG(16:0)+NH4	MG	(16:0)	(16:0)				348.311	C19 H42 O4 N1	0	123181	0	151866	0	0	233940	0	0	0	0	0	0	83398.6	193169	342185	135494	0	0	0	0	0	0	0	0	0	112870	268029	6.32061e+06	0	154471	0	0	0	0	0		348.311
0	MG(16:0)+H	MG(16:0)+H	MG	(16:0)	(16:0)				331.284	C19 H39 O4	0	0	0	0	0	0	0	0	0	0	0	0	0	0	2.08431e+06	0	0	0	0	0	0	0	0	0	0	0	137627	0	439421	0	693371	0	0	20504.2	0	0
0	MG(16:0)+NH4	MG(16:0)+NH4	MG	(16:0)	(16:0)				348.311	C19 H42 O4 N1	0	97725.6	0	149497	0	83084.2	0	0	0	154656	0	0	0	0	3.5204e+07	0	106123	0	0	0	0	0	156311	0	0	0	0	0	224131	0	1.01028e+07	0	146397	67745.3	122675	145930		348.311
0	MG(16:0)+H	MG(16:0)+H	MG	(16:0)	(16:0)				331.284	C19 H39 O4	0	0	0	0	0	0	0	0	0	0	0	0	0	0	0	0	0	0	172060	0	114610	0	170850	0	76686.5	0	2.70112e+06	0	0	0	0	0	0	0	79287.8	0
0	MG(16:0)+NH4	MG(16:0)+NH4	MG	(16:0)	(16:0)				348.311	C19 H42 O4 N1	0	86574.1	0	0	0	0	0	0	51863.9	0	0	118805	0	95948.9	407184	0	0	50892.6	1.17226e+06	0	359507	0	307508	0	739728	109276	2.96913e+06	0	98678.9	0	0	0	65115.7	0	170758	0		348.311
0	MG(18:0)+H	MG(18:0)+H	MG	(18:0)	(18:0)				359.316	C21 H43 O4	0	0	0	0	0	0	0	0	0	0	0	0	0	0	0	0	0	0	0	0	0	0	42594.8	0	2.61991e+06	0	63072.9	0	0	0	0	0	4.53834e+07	0	0	0
0	MG(18:0)+NH4	MG(18:0)+NH4	MG	(18:0)	(18:0)				376.342	C21 H46 O4 N1	0	0	0	0	0	8780.92	0	9117.65	0	3007.29	0	98765.3	0	1272.29	4745.75	76695.1	139642	9390.96	111346	0	398966	0	157478	0	3.56129e+06	6319.18	150803	6904.9	131227	0	316072	18175.8	1.29486e+08	83137.4	203692	0
1	MG(18:0)+NH4	MG(18:0)+NH4	MG	(18:0)	(18:0)				376.342	C21 H46 O4 N1	1.04105e+06	57457	0	0	871346	7317.11	832427	77254.3	337427	228201	214228	316740	1.38136e+06	121545	193412	1.18739e+06	235331	153811	104450	0	203080	349467	818067	592491	921515	213550	1.15981e+06	357947	682952	568588	147489	1.4136e+06	1.41479e+08	67343.1	483236	0	376.342
0	MG(18:0)+NH4	MG(18:0)+NH4	MG	(18:0)	(18:0)				376.342	C21 H46 O4 N1	0	0	0	0	0	0	0	0	0	0	0	97812.2	0	975172	1083.16	0	0	301415	0	0	0	173686	0	0	0	0	0	0	0	0	0	0	0	0	0	1.37646e+07
0	MG(18:0)+NH4	MG(18:0)+NH4	MG	(18:0)	(18:0)				376.342	C21 H46 O4 N1	0	0	0	0	0	0	0	3.12477e+06	0	410528	0	0	0	34554	0	0	0	0	0	0	0	0	0	0	0	0	0	0	0	0	0	0	0	3.30885e+06	0	109080
0	MG(18:0)+NH4	MG(18:0)+NH4	MG	(18:0)	(18:0)				376.342	C21 H46 O4 N1	0	0	0	1783.85	0	93737.9	0	0	0	0	0	371350	0	3.01672e+06	61533.7	0	59010.8	0	0	0	0	0	0	0	0	0	0	0	0	0	0	0	0	2411.4	0	0
0	MG(18:0)+H	MG(18:0)+H	MG	(18:0)	(18:0)				359.316	C21 H43 O4	0	0	0	0	0	0	0	0	0	0	0	0	0	1.17257e+06	0	0	0	0	0	0	0	0	0	0	0	0	0	0	0	0	0	0	0	0	0	0
0	MG(18:0)+H	MG(18:0)+H	MG	(18:0)	(18:0)				359.316	C21 H43 O4	0	0	0	0	0	2.03661e+06	0	6.55738e+06	0	4.23889e+06	0	0	0	0	0	0	0	0	0	0	0	0	0	0	0	0	0	0	0	0	0	0	0	0	0	0
0	MG(18:0)+NH4	MG(18:0)+NH4	MG	(18:0)	(18:0)				376.342	C21 H46 O4 N1	0	62195.9	0	78256.3	0	2.49188e+06	0	2.70246e+07	0	2.03981e+07	0	152435	0	108208	0	0	0	0	0	143932	0	135788	0	0	0	0	0	0	0	0	97106.4	0	172608	66215.5	236072	131358		376.342
0	MG(18:0)+NH4	MG(18:0)+NH4	MG	(18:0)	(18:0)				376.342	C21 H46 O4 N1	0	1.42751e+07	0	2.97103e+06	0	461296	0	0	0	125074	0	132060	0	0	222952	0	992952	0	0	0	0	0	0	0	0	0	54518.8	0	157772	0	756811	0	0	74453.4	0	135345		376.342
0	MG(18:0)+H	MG(18:0)+H	MG	(18:0)	(18:0)				359.316	C21 H43 O4	0	0	0	0	0	0	0	0	0	0	0	0	0	0	703281	0	0	0	0	0	0	0	0	0	0	0	0	0	3.23143e+06	0	1.3102e+06	0	0	0	0	0
0	MG(18:0)+NH4	MG(18:0)+NH4	MG	(18:0)	(18:0)				376.342	C21 H46 O4 N1	0	85383.9	0	412940	0	0	0	0	0	102624	0	261003	0	125790	1.46207e+07	0	388961	0	592557	485613	142762	362109	64396.6	0	422689	256998	1.0452e+07	292974	1.14424e+07	0	1.87176e+07	0	0	235192	1.04957e+07	348019		376.342
0	MG(20:0)+NH4	MG(20:0)+NH4	MG	(20:0)	(20:0)				404.373	C23 H50 O4 N1	0	0	0	0	0	1.09026e+06	0	0	0	0	0	0	0	0	0	0	0	0	0	0	0	0	0	0	0	0	0	0	0	0	0	0	0	0	0	0
0	MGDG(16:0/18:0)+HCOO	MGDG(34:0)+HCOO	MGDG	(16:0/18:0)	(16:0)	(18:0)			803.589	C44 H83 O12	0	0	7.54012e+06	0	1.04437e+07	0	1.17314e+07	0	0	0	9.42619e+06	0	0	0	0	0	0	5.23546e+06	0	0	0	0	0	0	0	0	0	0	0	0	0	0	0	0	0	0			803.589
0	MGDG(16:0/18:0)+HCOO	MGDG(34:0)+HCOO	MGDG	(16:0/18:0)	(16:0)	(18:0)			803.589	C44 H83 O12	0	0	0	0	0	0	0	0	0	0	0	0	0	0	0	0	0	0	0	123426	0	0	0	0	0	0	0	1.31182e+06	0	0	0	0	0	0	0	0
0	MGDG(16:0/18:0)+HCOO	MGDG(34:0)+HCOO	MGDG	(16:0/18:0)	(16:0)	(18:0)			803.589	C44 H83 O12	0	0	0	0	0	0	0	0	0	0	0	0	62826.3	0	0	0	0	0	0	289873	0	1.41293e+07	0	2.08309e+07	0	9.37405e+06	0	0	0	0	0	0	0	0	0	38173.4
0	MGDG(16:0/18:0)+HCOO	MGDG(34:0)+HCOO	MGDG	(16:0/18:0)	(16:0)	(18:0)			803.589	C44 H83 O12	0	0	0	0	0	0	0	0	0	0	0	0	0	0	0	0	0	0	0	5.48464e+06	11465.8	0	0	0	0	0	0	0	0	0	0	0	0	498.4	0	0
0	MGDG(16:0/18:1)+HCOO	MGDG(34:1)+HCOO	MGDG	(16:0/18:1)	(16:0)	(18:1)			801.573	C44 H81 O12	285569	0	1.31538e+07	0	1.88941e+07	0	1.59811e+07	0	0	0	1.69871e+07	0	0	0	0	0	0	3.06422e+06	0	0	0	0	0	0	0	0	0	0	0	0	0	0	0	0	0	0	801.573		801.573
0	MGDG(16:0/18:1)+HCOO	MGDG(34:1)+HCOO	MGDG	(16:0/18:1)	(16:0)	(18:1)			801.573	C44 H81 O12	0	0	0	0	0	0	0	0	0	0	0	0	0	0	0	0	0	0	0	0	0	0	0	0	0	0	0	0	0	0	0	1.21756e+06	0	0	0	0
0	MGDG(16:0/18:1)+HCOO	MGDG(34:1)+HCOO	MGDG	(16:0/18:1)	(16:0)	(18:1)			801.573	C44 H81 O12	0	0	0	0	0	0	0	0	0	0	0	0	0	0	0	0	0	0	0	0	0	0	0	0	0	0	0	1.13596e+06	0	0	0	0	0	0	0	0
0	MGDG(16:0/18:1)+HCOO	MGDG(34:1)+HCOO	MGDG	(16:0/18:1)	(16:0)	(18:1)			801.573	C44 H81 O12	0	0	0	0	0	0	0	0	0	0	0	0	0	0	0	0	0	0	0	5.26817e+06	0	2.02929e+07	0	2.17824e+07	0	0	0	0	0	0	0	0	0	0	0	0
0	MGDG(16:0/18:3)+H	MGDG(34:3)+H	MGDG	(16:0/18:3)	(16:0)	(18:3)			753.551	C43 H77 O10	3.58225e+06	0	2.27527e+08	0	1.80611e+07	0	1.63347e+08	0	3.91796e+06	0	1.08212e+08	0	557910	0	0	432062	0	2.52319e+07	0	0	0	0	0	0	0	0	271274	78381.9	0	4.54861e+06	0	115122	78456.4	0	508694	0	753.551		753.551
0	MGDG(16:0/20:0)+HCOO	MGDG(36:0)+HCOO	MGDG	(16:0/20:0)	(16:0)	(20:0)			831.62	C46 H87 O12	0	0	1.79858e+06	0	1.50933e+06	0	249529	0	0	0	2.22998e+06	0	0	0	0	0	0	0	0	0	0	0	0	0	0	0	0	0	0	60818.1	0	0	0	0	0	0			831.62
0	MGDG(16:0/20:1)+HCOO	MGDG(36:1)+HCOO	MGDG	(16:0/20:1)	(16:0)	(20:1)			829.605	C46 H85 O12	107004	0	2.99712e+06	0	3.31575e+06	0	1.01329e+07	0	0	0	3.07065e+06	0	0	0	0	0	0	7.14965e+06	0	0	0	0	0	0	0	0	0	0	0	0	0	0	0	0	0	0	829.605		829.605
0	MGDG(16:0/20:1)+HCOO	MGDG(36:1)+HCOO	MGDG	(16:0/20:1)	(16:0)	(20:1)			829.605	C46 H85 O12	0	0	0	0	0	0	0	0	0	0	0	0	0	0	0	0	0	0	0	0	0	0	0	0	0	0	0	0	0	1.26935e+07	0	0	0	0	0	0
0	MGDG(16:0/20:1)+HCOO	MGDG(36:1)+HCOO	MGDG	(16:0/20:1)	(16:0)	(20:1)			829.605	C46 H85 O12	0	0	0	0	0	0	0	0	0	0	0	0	0	0	0	0	0	0	0	0	0	5.91845e+06	0	7.44537e+06	0	4.22035e+06	0	0	0	0	0	0	0	0	0	0
0	MGDG(18:1/18:1)+HCOO	MGDG(36:2)+HCOO	MGDG	(18:1/18:1)	(18:1)	(18:1)			827.589	C46 H83 O12	0	0	0	0	0	0	0	0	0	0	0	0	0	0	0	0	0	0	0	0	0	0	0	0	0	0	0	6883.92	0	1.52648e+06	0	0	0	0	0	0
0	MePC(35:6)+NH4	MePC(35:6)+NH4	MePC	(35:6)	(35:6)				795.565	C44 H80 O8 N2 P1	3.12875e+06	0	4.57085e+07	0	5.3759e+07	0	1.18923e+06	0	1.18686e+06	0	3.65546e+07	0	0	0	0	28547.9	0	2.63174e+07	0	52234.2	0	227115	556723	9.75266e+06	0	0	0	0	655025	0	277280	2.48022e+06	0	0	0	0	795.565		795.565
0	MePC(35:6)+NH4	MePC(35:6)+NH4	MePC	(35:6)	(35:6)				795.565	C44 H80 O8 N2 P1	0	0	0	0	461.912	0	1268.61	0	0	0	0	40391.6	0	0	0	0	0	0	354094	0	0	0	2.59751e+06	0	219279	0	0	0	0	1.09136e+08	0	10787.4	112570	7950.26	0	4821.69
0	MePC(36:0)+NH4	MePC(36:0)+NH4	MePC	(36:0)	(36:0)				821.674	C45 H94 O8 N2 P1	3.26224e+06	0	8.79085e+06	0	6.67519e+06	0	2.45886e+07	0	16678.4	0	3.2984e+07	0	327462	0	0	17246.2	0	5.73811e+06	0	0	0	0	0	0	0	0	0	0	0	0	0	0	0	0	0	0	821.674		821.671
0	MePC(36:0)+NH4	MePC(36:0)+NH4	MePC	(36:0)	(36:0)				821.674	C45 H94 O8 N2 P1	0	0	0	0	0	0	757405	0	0	0	0	0	0	0	0	0	0	0	0	0	0	0	0	0	0	0	0	0	0	0	0	22092544	0	0	0	0
0	MePC(36:0)+NH4	MePC(36:0)+NH4	MePC	(36:0)	(36:0)				821.674	C45 H94 O8 N2 P1	0	0	148885	0	0	0	0	0	0	0	87994	0	0	0	0	0	0	9855.55	0	0	0	0	0	0	0	0	0	0	0	2.9455e+07	0	0	0	0	0	0			821.674
0	MePC(36:0)+NH4	MePC(36:0)+NH4	MePC	(36:0)	(36:0)				821.674	C45 H94 O8 N2 P1	0	0	0	0	0	0	0	0	0	0	0	0	0	0	0	0	0	0	0	0	0	0	0	0	0	1.4526e+07	0	293.452	0	0	0	0	0	0	0	0
0	MePC(36:0)+NH4	MePC(36:0)+NH4	MePC	(36:0)	(36:0)				821.674	C45 H94 O8 N2 P1	0	0	0	0	0	0	0	0	0	0	0	0	0	0	0	0	0	0	0	0	0	5.19716e+06	0	844298	0	171320	0	0	0	0	0	0	0	0	0	0
0	MePC(36:4)+NH4	MePC(36:4)+NH4	MePC	(36:4)	(36:4)				813.612	C45 H86 O8 N2 P1	0	0	0	32789.8	0	0	0	0	0	0	0	0	0	0	0	0	0	164419	0	0	0	0	0	0	0	0	0	0	0	2.67464e+07	0	664653	0	0	0	0
0	MePC(38:0)+NH4	MePC(38:0)+NH4	MePC	(38:0)	(38:0)				849.706	C47 H98 O8 N2 P1	52006.7	0	1.59641e+07	0	1.44302e+07	0	1.73472e+06	0	77724.4	0	1.32626e+07	0	0	0	0	0	0	0	0	0	0	0	0	0	0	0	0	0	0	0	0	0	0	0	0	0	849.706		849.706
0	MePC(38:0)+NH4	MePC(38:0)+NH4	MePC	(38:0)	(38:0)				849.706	C47 H98 O8 N2 P1	0	0	0	0	0	0	0	0	0	0	0	0	0	0	0	0	0	0	0	0	0	0	0	0	0	0	0	0	0	1.80953e+07	0	0	0	0	0	0
0	MePC(38:1)+NH4	MePC(38:1)+NH4	MePC	(38:1)	(38:1)				847.69	C47 H96 O8 N2 P1	8.12837e+06	0	6.78878e+07	0	4.43539e+07	0	3.66252e+07	0	4.31029e+06	0	5.52537e+07	0	1.01087e+06	0	0	1.07272e+06	0	3.56935e+07	0	0	0	0	0	0	0	0	0	0	0	0	0	0	32659.8	0	0	0	847.689		847.689
0	MePC(38:1)+NH4	MePC(38:1)+NH4	MePC	(38:1)	(38:1)				847.69	C47 H96 O8 N2 P1	0	0	0	0	0	0	3.08729e+06	0	0	2642	0	0	0	0	0	0	0	0	0	0	0	0	0	0	0	0	0	0	0	0	0	2.42486e+07	0	0	0	0
0	MePC(38:1)+NH4	MePC(38:1)+NH4	MePC	(38:1)	(38:1)				847.69	C47 H96 O8 N2 P1	4514.16	0	2.66883e+06	0	4.09455e+06	0	3.90377e+06	61557.4	0	0	6.41233e+06	0	0	0	0	0	0	4.01629e+06	0	0	0	0	0	0	0	0	0	0	0	3.38937e+07	0	0	0	0	0	0	847.69		847.69
0	MePC(38:1)+NH4	MePC(38:1)+NH4	MePC	(38:1)	(38:1)				847.69	C47 H96 O8 N2 P1	0	0	170480	0	266864	0	0	0	0	0	223.901	0	0	0	0	0	0	6.07595e+06	0	0	0	0	0	0	0	1025.25	0	1.00933e+07	0	0	0	9000.45	0	0	0	0			847.69
0	MePC(38:1)+NH4	MePC(38:1)+NH4	MePC	(38:1)	(38:1)				847.69	C47 H96 O8 N2 P1	0	0	0	0	0	0	0	0	0	0	0	0	0	0	0	0	0	0	0	0	0	0	0	0	0	3.93014e+07	0	2.31012e+06	0	1.94953e+07	0	0	0	0	0	0
0	MePC(38:1)+NH4	MePC(38:1)+NH4	MePC	(38:1)	(38:1)				847.69	C47 H96 O8 N2 P1	0	0	0	0	0	0	0	0	0	0	0	0	0	0	0	0	0	0	0	1.68588e+07	0	4.29021e+07	0	1.10632e+07	0	2.42166e+07	0	0	0	0	0	0	0	0	0	0
0	MePC(38:1)+NH4	MePC(38:1)+NH4	MePC	(38:1)	(38:1)				847.69	C47 H96 O8 N2 P1	0	0	0	0	0	0	0	0	0	0	0	0	0	0	0	0	0	0	0	1.72623e+07	0	16487.2	0	0	0	50280	0	0	0	0	0	0	0	0	0	1.53376e+07
0	MePC(38:1)+NH4	MePC(38:1)+NH4	MePC	(38:1)	(38:1)				847.69	C47 H96 O8 N2 P1	0	0	0	0	0	0	0	0	0	0	0	0	0	0	0	0	0	0	0	0	0	1.86263e+07	0	9.50309e+06	0	0	0	0	0	0	0	0	0	4.66232e+06	0	0
0	MePC(38:1e)+NH4	MePC(38:1e)+NH4	MePC	(38:1e)	(38:1e)				833.711	C47 H98 O7 N2 P1	0	0	0	0	0	0	0	0	0	0	0	0	0	0	0	0	0	0	0	0	0	0	0	0	0	0	0	0	0	4.12846e+06	0	0	0	0	0	0
0	MePC(39:0)+NH4	MePC(39:0)+NH4	MePC	(39:0)	(39:0)				863.721	C48 H100 O8 N2 P1	0	0	108256	0	6.94406e+06	0	1.39117e+06	0	0	0	7.3809e+06	0	0	0	0	0	0	8.87124e+06	0	0	0	0	0	0	0	0	0	0	0	0	0	0	0	0	0	0			863.72
0	MePC(39:1)+NH4	MePC(39:1)+NH4	MePC	(39:1)	(39:1)				861.706	C48 H98 O8 N2 P1	281163	0	2.28586e+07	0	1.51781e+07	0	5.85969e+06	0	4344.18	0	7.1753e+06	0	260091	0	0	0	0	53874.6	0	0	0	0	0	0	0	0	0	0	0	0	0	0	0	0	0	0	861.706		861.704
0	MePC(39:1)+NH4	MePC(39:1)+NH4	MePC	(39:1)	(39:1)				861.706	C48 H98 O8 N2 P1	0	0	0	0	0	0	0	0	0	0	0	0	0	0	0	0	0	0	0	0	0	0	0	0	0	0	0	0	0	4.95615e+06	0	0	0	0	0	0
0	MePC(39:6)+NH4	MePC(39:6)+NH4	MePC	(39:6)	(39:6)				851.627	C48 H88 O8 N2 P1	370661	0	4.95222e+06	0	2.38416e+06	0	0	0	0	0	780073	0	0	0	0	0	0	4.81775e+06	0	0	0	0	0	0	0	0	0	0	0	0	0	7717.48	0	0	0	0	851.627		851.626
0	MePC(39:6)+NH4	MePC(39:6)+NH4	MePC	(39:6)	(39:6)				851.627	C48 H88 O8 N2 P1	0	0	0	0	0	0	0	0	0	0	0	0	0	0	0	0	0	0	0	0	0	0	0	0	0	0	0	0	0	9.52436e+06	0	0	0	0	0	0
0	MePC(39:6)+NH4	MePC(39:6)+NH4	MePC	(39:6)	(39:6)				851.627	C48 H88 O8 N2 P1	0	0	0	0	0	0	0	0	0	0	0	0	0	0	0	0	0	0	0	1007.73	0	4.76362e+06	0	6.54187e+06	0	0	0	0	0	0	0	0	0	0	0	0
0	MePC(40:1)+NH4	MePC(40:1)+NH4	MePC	(40:1)	(40:1)				875.721	C49 H100 O8 N2 P1	1.29966e+06	0	4.59696e+07	0	4.41323e+07	0	4.50145e+07	127635	181173	0	4.26735e+07	0	0	0	0	136088	0	5.31e+07	0	0	0	0	0	0	0	0	0	0	0	0	0	0	0	0	0	0	875.721		875.72
0	MePC(40:1)+NH4	MePC(40:1)+NH4	MePC	(40:1)	(40:1)				875.721	C49 H100 O8 N2 P1	0	0	0	0	301608	0	90848.5	0	0	0	726.997	0	0	0	0	0	0	251663	0	0	0	0	0	0	0	0	0	0	0	0	0	1.19534e+07	0	0	0	0
0	MePC(40:1)+NH4	MePC(40:1)+NH4	MePC	(40:1)	(40:1)				875.721	C49 H100 O8 N2 P1	0	0	0	0	0	0	0	0	0	0	0	0	0	0	0	0	0	0	0	0	0	0	0	0	0	0	0	0	0	5.75448e+07	0	0	0	0	0	0
0	MePC(40:1)+NH4	MePC(40:1)+NH4	MePC	(40:1)	(40:1)				875.721	C49 H100 O8 N2 P1	0	0	0	0	0	0	0	0	0	0	0	0	0	0	0	0	0	0	0	0	0	0	0	0	0	3.70133e+07	0	0	0	0	0	0	0	0	0	0
0	MePC(40:1)+NH4	MePC(40:1)+NH4	MePC	(40:1)	(40:1)				875.721	C49 H100 O8 N2 P1	0	0	0	0	0	0	0	0	0	111047	0	0	0	0	0	0	0	0	0	98667.9	0	2.5083e+07	0	4.2246e+07	0	940276	0	0	0	0	0	0	0	0	0	0
0	MePC(40:1)+NH4	MePC(40:1)+NH4	MePC	(40:1)	(40:1)				875.721	C49 H100 O8 N2 P1	0	0	0	0	0	0	0	0	0	0	0	0	0	0	0	0	0	0	0	6287.54	0	0	0	380063	0	0	0	0	0	0	0	0	0	3.0167e+06	0	0
0	MePC(40:4)+NH4	MePC(40:4)+NH4	MePC	(40:4)	(40:4)				869.674	C49 H94 O8 N2 P1	642801	0	1.71132e+07	0	1.64339e+07	0	1.83525e+07	0	0	0	1.41463e+07	0	194779	0	0	112466	0	2.06266e+07	0	0	0	0	0	0	0	0	0	0	0	0	0	0	0	0	0	0	869.674		869.673
0	MePC(40:4)+NH4	MePC(40:4)+NH4	MePC	(40:4)	(40:4)				869.674	C49 H94 O8 N2 P1	1611.65	0	2.95477e+07	0	3.3994e+07	0	6.51549e+06	0	1902.1	0	2.69153e+07	0	0	0	0	0	0	924263	0	0	0	0	0	0	0	0	0	0	0	7.15474e+06	0	0	0	0	0	0	869.674		869.674
0	MePC(40:4)+NH4	MePC(40:4)+NH4	MePC	(40:4)	(40:4)				869.674	C49 H94 O8 N2 P1	0	0	0	0	0	0	202417	0	0	0	0	0	0	0	0	0	0	0	0	0	0	0	0	0	0	1.17659e+07	0	0	0	558620	0	0	400007	0	0	0
0	MePC(40:4)+NH4	MePC(40:4)+NH4	MePC	(40:4)	(40:4)				869.674	C49 H94 O8 N2 P1	0	0	0	0	0	0	0	0	0	0	0	49584.8	0	0	0	0	0	0	0	7.8544e+06	0	4.23275e+06	0	1.90265e+07	0	1.30172e+06	0	0	0	377982	0	0	0	0	0	0
0	MePC(40:4)+NH4	MePC(40:4)+NH4	MePC	(40:4)	(40:4)				869.674	C49 H94 O8 N2 P1	0	1225.84	0	0	0	0	0	0	0	0	0	0	0	0	0	0	256180	0	0	0	0	771714	0	1.33049e+06	0	0	0	0	0	0	0	0	0	7.67636e+06	0	3.82254e+06		869.674
0	MePC(40:6)+NH4	MePC(40:6)+NH4	MePC	(40:6)	(40:6)				865.643	C49 H90 O8 N2 P1	212874	0	1.26231e+07	130238	1.37427e+07	0	1.14754e+07	0	0	0	9.95451e+06	0	0	0	0	0	116137	1.50002e+07	0	0	0	0	0	0	0	0	0	0	0	0	0	0	0	0	0	0	865.643		865.643
0	MePC(41:1)+NH4	MePC(41:1)+NH4	MePC	(41:1)	(41:1)				889.737	C50 H102 O8 N2 P1	401770	0	940949	0	6.30225e+06	0	1.09452e+07	0	0	0	2.63722e+06	0	0	0	0	0	0	3.78729e+06	0	0	0	0	0	0	0	0	1.31837e+06	0	0	0	0	0	0	0	0	0	889.737		889.737
0	MePC(42:6)+NH4	MePC(42:6)+NH4	MePC	(42:6)	(42:6)				893.674	C51 H94 O8 N2 P1	133440	0	1.07249e+07	0	1.31348e+06	0	1.35094e+07	0	288346	0	1.12236e+07	0	0	0	0	130005	0	2.26092e+07	0	0	0	0	0	0	0	0	0	0	0	1.15216e+06	0	0	0	0	0	0	893.674		893.674
0	MePC(42:6)+NH4	MePC(42:6)+NH4	MePC	(42:6)	(42:6)				893.674	C51 H94 O8 N2 P1	7588.78	0	1.94951e+06	0	90112.7	440.394	7.79676e+06	0	1003.67	0	1.00137e+07	0	554152	0	0	0	0	1.29455e+07	0	0	0	0	0	0	0	0	0	0	0	2.28335e+07	0	0	0	0	0	0	893.674		893.674
0	MePC(42:6)+NH4	MePC(42:6)+NH4	MePC	(42:6)	(42:6)				893.674	C51 H94 O8 N2 P1	0	0	0	0	0	0	0	0	0	0	0	0	0	0	0	0	71031.9	0	0	4.80933e+06	0	8.47616e+06	0	345309	0	1.57266e+07	0	0	0	2.58236e+06	0	0	0	0	0	0
0	MePC(43:6)+NH4	MePC(43:6)+NH4	MePC	(43:6)	(43:6)				907.69	C52 H96 O8 N2 P1	0	0	1.89534e+06	0	3.10658e+06	0	92904.2	0	0	0	2.21243e+06	0	0	0	0	0	0	149639	0	0	0	0	0	0	0	0	0	0	0	0	0	0	0	0	0	0			907.69
0	MePC(44:6)+NH4	MePC(44:6)+NH4	MePC	(44:6)	(44:6)				921.706	C53 H98 O8 N2 P1	0	0	24229.7	0	1.05867e+07	0	1.05246e+07	0	0	0	9.93852e+06	0	0	0	0	0	0	7.74833e+06	0	0	0	0	0	0	0	0	0	0	0	0	0	0	0	0	0	0			921.705
0	MePC(44:6)+NH4	MePC(44:6)+NH4	MePC	(44:6)	(44:6)				921.706	C53 H98 O8 N2 P1	0	0	0	0	0	0	0	0	0	0	0	10132.2	0	0	0	0	0	0	0	0	0	0	0	0	0	0	0	0	0	1.33368e+07	0	0	0	0	0	0
0	MePC(44:6)+NH4	MePC(44:6)+NH4	MePC	(44:6)	(44:6)				921.706	C53 H98 O8 N2 P1	0	0	0	0	0	0	0	0	0	0	0	0	0	0	0	0	0	0	0	3227.12	0	0	0	0	0	9.98082e+06	0	0	0	0	0	0	0	0	0	0
0	PA(16:0/18:1)-H	PA(34:1)-H	PA	(16:0/18:1)	(16:0)	(18:1)			673.481	C37 H70 O8 N0 P1	0	0	2.07423e+06	0	1.43981e+07	0	9.26211e+06	0	457288	0	1.2549e+07	0	0	0	0	1.53079e+06	0	1.5192e+07	0	39034.8	0	127635	0	122640	0	0	0	39772.8	0	0	0	0	0	0	0	0			673.482
0	PA(16:0/18:1)-H	PA(34:1)-H	PA	(16:0/18:1)	(16:0)	(18:1)			673.481	C37 H70 O8 N0 P1	0	0	276432	0	186334	0	182566	0	0	0	154832	22084.4	0	0	0	0	0	810116	0	125733	0	44050.7	0	0	0	0	0	0	0	2.29907e+07	0	103679	0	0	0	36865.8			673.481
0	PA(16:0/18:1)-H	PA(34:1)-H	PA	(16:0/18:1)	(16:0)	(18:1)			673.481	C37 H70 O8 N0 P1	0	0	104836	0	105187	0	113873	0	0	0	0	0	0	0	0	0	0	355124	0	64192.5	0	72177.1	0	0	0	0	0	6.30412e+06	0	1.52042e+06	0	0	0	0	0	0			673.481
0	PA(16:0/18:1)-H	PA(34:1)-H	PA	(16:0/18:1)	(16:0)	(18:1)			673.481	C37 H70 O8 N0 P1	0	0	0	0	0	0	0	0	0	0	0	0	0	0	0	0	0	5542.73	0	0	0	0	0	0	0	944770	0	129308	0	45.516	0	0	0	0	0	0
0	PA(20:0/16:0)-H	PA(36:0)-H	PA	(20:0/16:0)	(20:0)	(16:0)			703.528	C39 H76 O8 N0 P1	6.1843e+06	0	2.70926e+06	0	1.52508e+06	0	1.94805e+06	0	5.56794e+06	0	1.26425e+06	0	7.4533e+06	0	0	2.78976e+06	0	1.21073e+07	0	0	0	0	0	0	0	0	0	0	0	713258	0	641626	0	0	0	0	703.528		703.528
0	PA(20:0/16:0)-H	PA(36:0)-H	PA	(20:0/16:0)	(20:0)	(16:0)			703.528	C39 H76 O8 N0 P1	0	0	0	0	0	0	0	0	0	0	0	0	0	0	0	0	0	0	0	0	0	0	0	68011.3	0	0	0	0	0	0	0	0	0	0	0	5.0055e+06
0	PA(18:0/18:1)-H	PA(36:1)-H	PA	(18:0/18:1)	(18:0)	(18:1)			701.513	C39 H74 O8 N0 P1	335269	0	1.24351e+07	0	3.11454e+07	0	1.80789e+07	0	2.03275e+06	0	1.97947e+07	0	0	0	0	2.40344e+06	0	3.68454e+06	0	73712.9	0	72728.4	0	44878	0	18620.2	0	59415.2	0	15774.6	0	3.12516e+06	0	0	0	0	701.513		701.512
1	PA(18:0/18:1)-H	PA(36:1)-H	PA	(18:0/18:1)	(18:0)	(18:1)			701.513	C39 H74 O8 N0 P1	306702	0	4.3146e+06	0	6.41108e+06	0	1.2141e+07	0	279172	0	1.78312e+06	0	0	0	0	1.03473e+06	0	9.87333e+06	0	47164.1	0	72728.4	0	44878	0	18620.2	0	154367	0	15774.6	0	334204	0	0	0	0			701.513
0	PA(18:0/18:1)-H	PA(36:1)-H	PA	(18:0/18:1)	(18:0)	(18:1)			701.513	C39 H74 O8 N0 P1	0	0	1.27407e+07	0	2.95973e+06	0	1.31342e+06	0	72018	0	1.47383e+06	0	0	0	0	424046	0	5.80489e+06	0	42452.9	0	153365	0	106220	0	76621.8	0	64824.7	0	5.40254e+07	0	132007	0	0	0	64172.7
0	PA(18:0/18:1)-H	PA(36:1)-H	PA	(18:0/18:1)	(18:0)	(18:1)			701.513	C39 H74 O8 N0 P1	0	0	522239	0	412646	0	137329	0	0	0	5916.96	0	0	0	0	0	0	112596	0	3070.69	0	0	0	0	0	5.92169e+06	0	288554	0	1.38657e+06	0	2713.89	0	0	0	0			701.513
0	PA(18:0/18:1)-H	PA(36:1)-H	PA	(18:0/18:1)	(18:0)	(18:1)			701.513	C39 H74 O8 N0 P1	0	0	153710	0	271055	0	86562.7	0	0	0	86617.2	0	0	0	0	0	0	163789	0	2.48933e+06	0	1.35705e+06	0	1.35128e+07	0	5.81328e+06	0	316219	0	1.14591e+07	0	0	0	116585	0	1.01366e+06			701.513
0	PA(18:0/20:0)-H	PA(38:0)-H	PA	(18:0/20:0)	(18:0)	(20:0)			731.56	C41 H80 O8 N0 P1	5.10042e+06	0	6.37865e+06	0	139838	0	4.59811e+06	0	4.9725e+06	0	142948	0	5.82835e+06	0	0	6.98058e+06	0	4.06593e+06	0	0	0	0	0	0	0	0	0	0	0	9.12698e+06	0	4.01256e+07	0	0	0	0	731.56		731.56
0	PA(18:0/20:0)-H	PA(38:0)-H	PA	(18:0/20:0)	(18:0)	(20:0)			731.56	C41 H80 O8 N0 P1	0	0	0	0	0	0	0	0	0	0	0	0	0	0	0	0	0	0	0	0	0	100244	0	0	0	5.73235e+06	0	1.46222e+07	0	0	0	0	0	0	0	0
0	PA(20:0e/18:1)-H	PA(38:1e)-H	PA	(20:0e/18:1)	(20:0e)	(18:1)			715.565	C41 H80 O7 N0 P1	0	0	517524	0	1.68938e+06	0	7.82811e+06	0	0	0	1.70817e+06	0	0	0	0	0	0	0	0	0	0	0	0	0	0	0	0	0	0	0	0	0	0	0	0	0			715.565
0	PA(18:0/20:4)-H	PA(38:4)-H	PA	(18:0/20:4)	(18:0)	(20:4)			723.497	C41 H72 O8 N0 P1	0	0	615462	21253	1.55371e+06	206.03	1.1522e+06	0	167449	0	3.6704e+06	0	0	0	0	568.648	0	2.15381e+06	0	0	0	0	0	0	0	0	0	0	0	0	0	0	0	0	0	0			723.497
0	PA(18:0/20:4)-H	PA(38:4)-H	PA	(18:0/20:4)	(18:0)	(20:4)			723.497	C41 H72 O8 N0 P1	0	0	0	0	0	0	0	0	0	0	0	0	0	0	0	0	0	0	0	0	0	0	0	0	0	0	0	0	0	2.92718e+06	0	0	0	0	0	0
0	PA(24:2/20:4)-H	PA(44:6)-H	PA	(24:2/20:4)	(24:2)	(20:4)			803.56	C47 H80 O8 N0 P1	0	0	0	0	0	0	0	0	0	0	0	0	0	0	0	0	0	0	0	0	0	0	0	0	0	1.64453e+07	0	0	0	285434	0	0	0	0	0	0
0	PA(24:0/22:4)-H	PA(46:4)-H	PA	(24:0/22:4)	(24:0)	(22:4)			835.622	C49 H88 O8 N0 P1	0	0	0	0	0	0	0	0	0	0	0	0	0	0	0	0	0	0	0	7.8837e+06	0	5687.4	0	6.37051e+06	0	0	0	0	0	0	0	0	0	0	0	0
0	PC(28:0)+H	PC(28:0)+H	PC	(28:0)	(28:0)				678.507	C36 H73 O8 N1 P1	0	4227.5	1.65382e+06	0	2.23091e+06	14215.9	1.94852e+06	0	2286.24	0	2.11193e+06	0	0	0	0	0	2414.87	545363	0	0	0	0	0	0	0	0	0	0	0	0	0	0	0	2789.15	0	0		678.507	678.507
0	PC(28:0)+H	PC(28:0)+H	PC	(28:0)	(28:0)				678.507	C36 H73 O8 N1 P1	0	0	0	0	0	0	0	0	0	0	0	0	0	0	0	0	0	0	0	0	0	0	0	0	0	0	0	0	0	3.50035e+06	0	0	0	0	0	0
0	PC(28:0)+H	PC(28:0)+H	PC	(28:0)	(28:0)				678.507	C36 H73 O8 N1 P1	0	0	0	0	0	0	0	0	0	0	0	0	0	0	0	0	0	0	0	0	0	1.85402e+06	708.704	6.03931e+06	0	0	0	0	0	0	0	0	425003	0	0	0
0	PC(30:0)+H	PC(30:0)+H	PC	(30:0)	(30:0)				706.538	C38 H77 O8 N1 P1	0	0	0	0	0	0	0	0	0	0	0	0	0	0	0	0	0	0	0	0	0	0	0	0	0	0	1.36283e+06	0	3.11226e+06	0	1.18419e+06	0	0	0	0	0
0	PC(30:0)+H	PC(30:0)+H	PC	(30:0)	(30:0)				706.538	C38 H77 O8 N1 P1	0	0	0	0	103202	0	0	0	0	0	0	0	0	0	0	0	0	0	6.3722e+06	0	0	0	0	0	0	0	0	0	0	0	0	0	0	0	0	0
0	PC(16:0/14:0)+HCOO	PC(30:0)+HCOO	PC	(16:0/14:0)	(16:0)	(14:0)			750.529	C39 H77 O10 N1 P1	1.08286e+06	0	2.68476e+07	0	2.26987e+07	0	2.60686e+07	0	859005	0	2.24849e+07	0	0	0	0	261864	0	4.31818e+07	0	0	0	0	0	0	0	0	0	0	0	0	0	0	0	0	0	0	750.529		750.529
0	PC(30:0)+H	PC(30:0)+H	PC	(16:0/14:0)	(16:0)	(14:0)			706.538	C38 H77 O8 N1 P1	1.16594e+07	0	4.26065e+08	0	3.71819e+08	0	3.89509e+08	0	6.95214e+06	0	3.53768e+08	0	3.80423e+06	0	0	11798.7	0	5.95589e+08	0	0	0	0	0	0	0	0	0	0	0	0	0	106156	0	0	0	0	706.537		706.537
0	PC(16:0/14:0)+HCOO	PC(30:0)+HCOO	PC	(16:0/14:0)	(16:0)	(14:0)			750.529	C39 H77 O10 N1 P1	130405	0	9.26907e+06	0	1.19459e+07	0	9.80992e+06	0	103608	0	6.18233e+06	0	0	0	0	0	0	2.64017e+06	0	0	0	0	0	0	0	0	0	0	0	0	0	5.31456e+06	0	0	0	0	750.529		750.529
0	PC(30:0)+H	PC(30:0)+H	PC	(16:0/14:0)	(16:0)	(14:0)			706.538	C38 H77 O8 N1 P1	0	0	0	0	0	0	1395.48	0	0	0	0	0	0	0	0	0	0	0	0	0	0	0	0	0	0	0	0	0	0	0	0	7.27264e+07	0	0	0	0
0	PC(16:0/14:0)+HCOO	PC(30:0)+HCOO	PC	(16:0/14:0)	(16:0)	(14:0)			750.529	C39 H77 O10 N1 P1	108962	0	2.48261e+06	0	2.18369e+06	0	1.76395e+07	0	0	0	593099	0	16752.5	0	0	0	0	582653	0	0	0	0	0	0	0	0	0	0	0	4.04596e+07	0	678.134	0	0	0	0	750.529		750.529
0	PC(30:0)+H	PC(30:0)+H	PC	(16:0/14:0)	(16:0)	(14:0)			706.538	C38 H77 O8 N1 P1	0	0	0	0	0	0	0	0	0	0	0	0	0	0	0	0	0	0	0	0	0	0	0	0	0	0	0	0	0	8.69176e+08	0	0	0	47473.5	131.964	0
0	PC(30:0)+H	PC(30:0)+H	PC	(30:0)	(30:0)				706.538	C38 H77 O8 N1 P1	0	0	0	0	0	0	0	0	0	0	0	0	0	0	0	0	0	0	0	0	0	0	0	0	0	0	0	2.74986e+07	0	0	0	0	0	0	0	0
0	PC(16:0/14:0)+HCOO	PC(30:0)+HCOO	PC	(16:0/14:0)	(16:0)	(14:0)			750.529	C39 H77 O10 N1 P1	0	0	0	0	0	0	0	0	0	0	0	0	0	0	0	0	0	0	0	0	0	0	0	0	0	1.67411e+07	0	197407	0	0	0	0	0	0	0	0
0	PC(30:0)+H	PC(30:0)+H	PC	(16:0/14:0)	(16:0)	(14:0)			706.538	C38 H77 O8 N1 P1	0	0	0	0	0	0	0	0	0	0	0	0	0	0	0	0	0	0	0	0	0	0	0	0	0	3.51284e+08	0	0	0	0	0	0	0	0	0	0
0	PC(16:0/14:0)+HCOO	PC(30:0)+HCOO	PC	(16:0/14:0)	(16:0)	(14:0)			750.529	C39 H77 O10 N1 P1	0	0	0	0	0	0	0	0	0	0	0	0	0	0	0	0	0	0	0	9.89756e+06	0	1.72455e+07	0	3.78203e+07	0	1.87316e+07	0	3.49064e+06	0	0	0	0	0	0	0	0
0	PC(30:0)+H	PC(30:0)+H	PC	(16:0/14:0)	(16:0)	(14:0)			706.538	C38 H77 O8 N1 P1	0	0	0	0	0	0	0	69037.7	0	0	0	0	0	0	0	0	0	0	0	1.7223e+08	0	3.5802e+08	0	6.78454e+08	0	0	0	0	0	0	0	0	0	0	0	0
0	PC(30:0)+H	PC(30:0)+H	PC	(30:0)	(30:0)				706.538	C38 H77 O8 N1 P1	0	0	0	0	0	0	0	0	0	0	0	0	0	0	0	0	0	0	0	0	0	0	0	0	0	0	0	0	0	0	0	0	0	0	0	2.16962e+07
0	PC(16:0/14:0)+HCOO	PC(30:0)+HCOO	PC	(16:0/14:0)	(16:0)	(14:0)			750.529	C39 H77 O10 N1 P1	0	0	0	0	0	0	0	0	0	0	0	0	0	0	0	0	0	0	0	6.21084e+06	0	0	0	0	0	0	0	0	0	0	0	0	0	3.9874e+06	0	462601
0	PC(30:0)+H	PC(30:0)+H	PC	(16:0/14:0)	(16:0)	(14:0)			706.538	C38 H77 O8 N1 P1	0	0	0	0	0	0	0	0	0	0	0	0	0	0	0	0	0	0	0	0	0	0	0	0	0	0	0	0	0	0	0	0	0	601067	0	0
0	PC(30:0e)+H	PC(30:0e)+H	PC	(30:0e)	(30:0e)				692.559	C38 H79 O7 N1 P1	64707.3	0	6.80806e+06	0	6.34348e+06	0	6.26618e+06	0	0	0	5.48166e+06	0	0	0	0	0	0	1.29743e+07	0	0	0	0	0	0	0	0	0	0	0	0	0	0	0	0	0	0	692.559		692.559
0	PC(30:0e)+H	PC(30:0e)+H	PC	(30:0e)	(30:0e)				692.559	C38 H79 O7 N1 P1	0	0	0	0	0	0	0	0	0	0	0	0	0	0	0	0	0	0	0	0	0	0	0	0	0	0	0	0	0	1.94186e+07	0	0	0	0	0	0
0	PC(30:0e)+H	PC(30:0e)+H	PC	(30:0e)	(30:0e)				692.559	C38 H79 O7 N1 P1	0	0	0	0	0	0	0	0	0	0	0	0	0	0	0	0	0	0	0	0	0	0	0	0	0	1.90456e+07	0	0	0	0	0	0	0	0	0	0
0	PC(15:0/16:0)+HCOO	PC(31:0)+HCOO	PC	(15:0/16:0)	(15:0)	(16:0)			764.545	C40 H79 O10 N1 P1	0	0	9.11073e+06	0	7.39341e+06	0	6.16016e+06	0	124276	0	10108.4	0	0	0	0	0	0	1.00861e+07	0	0	0	0	0	0	0	0	0	0	0	0	0	0	0	0	0	0			764.545
0	PC(31:0)+H	PC(31:0)+H	PC	(15:0/16:0)	(15:0)	(16:0)			720.554	C39 H79 O8 N1 P1	3.00833e+06	0	1.54745e+08	0	1.48653e+08	0	1.34246e+08	0	1.28754e+06	0	1.14881e+08	0	704886	0	0	334680	0	2.53382e+08	0	0	0	691756	0	761261	0	0	0	0	0	195648	0	0	0	0	0	0	720.554		720.553
0	PC(31:0)+H	PC(31:0)+H	PC	(31:0)	(31:0)				720.554	C39 H79 O8 N1 P1	565627	0	1.59423e+07	0	1.49279e+07	0	8.44776e+06	0	4686.97	0	1.05907e+07	0	47346.5	0	0	0	0	5.77088e+06	0	0	0	0	0	0	0	0	0	4025.32	9368.22	0	0	2.63058e+07	0	0	0	0	720.554		720.554
0	PC(15:0/16:0)+HCOO	PC(31:0)+HCOO	PC	(15:0/16:0)	(15:0)	(16:0)			764.545	C40 H79 O10 N1 P1	0	0	0	0	53185.3	0	6961.82	0	0	0	14427.4	0	0	0	0	0	0	0	0	0	0	0	0	0	0	0	0	0	0	1.19524e+07	0	0	0	0	0	0
0	PC(31:0)+H	PC(31:0)+H	PC	(15:0/16:0)	(15:0)	(16:0)			720.554	C39 H79 O8 N1 P1	0	0	6061.82	0	130938	0	1.75769e+07	0	2577.8	0	9.50386e+06	0	0	0	0	0	0	1.18207e+06	0	0	0	0	0	0	0	0	0	0	0	3.40256e+08	0	903241	0	580.398	0	0			720.554
0	PC(15:0/16:0)+HCOO	PC(31:0)+HCOO	PC	(15:0/16:0)	(15:0)	(16:0)			764.545	C40 H79 O10 N1 P1	0	0	0	0	0	0	0	0	0	0	0	0	0	0	0	0	0	0	0	0	0	0	0	0	0	6.71029e+06	0	0	0	0	0	0	0	0	0	0
0	PC(15:0/16:0)+H	PC(31:0)+H	PC	(15:0/16:0)	(15:0)	(16:0)			720.554	C39 H79 O8 N1 P1	0	0	5990.21	0	1.19283e+06	0	326989	0	0	0	0	0	0	0	0	0	0	1.04187e+06	0	2186.41	0	2660.16	0	15948.4	0	1.57055e+08	0	920265	0	1.67076e+07	0	0	0	0	0	0			720.554
0	PC(15:0/16:0)+HCOO	PC(31:0)+HCOO	PC	(15:0/16:0)	(15:0)	(16:0)			764.545	C40 H79 O10 N1 P1	0	0	0	0	0	0	0	0	0	0	0	0	0	0	0	0	0	0	0	1.27508e+06	0	8464.84	0	22962.3	0	0	0	0	0	0	0	0	0	0	0	0
1	PC(15:0/16:0)+HCOO	PC(31:0)+HCOO	PC	(15:0/16:0)	(15:0)	(16:0)			764.545	C40 H79 O10 N1 P1	0	0	0	0	0	0	0	0	0	0	0	0	0	0	0	0	0	0	0	2.71182e+06	0	0	0	0	0	246506	0	0	0	0	0	0	0	0	0	0
0	PC(15:0/16:0)+HCOO	PC(31:0)+HCOO	PC	(15:0/16:0)	(15:0)	(16:0)			764.545	C40 H79 O10 N1 P1	0	0	0	0	0	0	0	0	0	0	0	0	0	0	0	0	0	0	0	0	0	0	0	0	0	0	0	0	0	0	0	0	0	1.51633e+06	0	0
0	PC(31:1)+H	PC(31:1)+H	PC	(31:1)	(31:1)				718.538	C39 H77 O8 N1 P1	0	0	0	0	229231	0	0	0	0	0	0	0	0	0	0	0	0	0	4.94681e+06	0	1.66405e+06	0	3.95106e+06	0	8.57211e+06	0	459311	137519	0	5.76134e+08	0	0	0	0	128101	0
0	PC(31:1)+H	PC(31:1)+H	PC	(31:1)	(31:1)				718.538	C39 H77 O8 N1 P1	0	0	0	0	0	0	0	0	0	0	0	0	0	0	0	0	0	59763.1	0	0	0	731801	0	3.54095e+06	0	841778	0	0	0	4449.11	0	0	0	6.14693e+07	0	0
0	PC(16:0/16:0)+HCOO	PC(32:0)+HCOO	PC	(16:0/16:0)	(16:0)	(16:0)			778.56	C41 H81 O10 N1 P1	0	2.08314e+06	0	82723.4	0	0	0	0	0	0	0	0	0	0	4.87455e+06	0	2.06326e+06	0	2.10868e+07	0	5.82266e+06	0	3.95312e+06	0	1.86773e+07	0	2.02159e+07	0	1.63527e+07	0	3.26741e+07	0	3.9583e+06	7770.77	1.08976e+07	70673.5		778.56
0	PC(32:0)+H	PC(32:0)+H	PC	(16:0/16:0)	(16:0)	(16:0)			734.569	C40 H81 O8 N1 P1	0	2.36544e+07	4162.4	5.40321e+06	27577.1	4303.52	0	7034.46	84568.7	0	0	0	0	2.06581e+06	2.64896e+08	491987	6.02204e+07	42662.1	0	2.19168e+06	0	5.96276e+06	0	412857	0	0	4.79359e+06	175903	7.7226e+07	0	1.32888e+06	0	0	294993	0	9.81898e+06		734.568
0	PC(16:0/16:0)+HCOO	PC(32:0)+HCOO	PC	(16:0/16:0)	(16:0)	(16:0)			778.56	C41 H81 O10 N1 P1	0	207010	0	0	0	0	0	0	0	0	0	0	0	0	0	0	0	0	0	0	0	0	0	0	0	0	1.67837e+06	0	7.02763e+06	0	485985	0	0	0	0	0
0	PC(32:0)+H	PC(32:0)+H	PC	(16:0/16:0)	(16:0)	(16:0)			734.569	C40 H81 O8 N1 P1	554812	4.16823e+07	136760	130136	76903.5	4303.52	28937.6	126350	131233	0	0	0	0	4.46109e+06	2.65253e+08	625639	6.02608e+07	42662.1	1.35494e+09	56274.3	4.98589e+07	115408	130694	37242.6	4.42517e+07	0	3.54796e+08	175903	8.94767e+07	0	1.17581e+08	0	1.22085e+08	37260	2.04739e+07	35729.6	734.569
0	PC(16:0/16:0)+HCOO	PC(32:0)+HCOO	PC	(16:0/16:0)	(16:0)	(16:0)			778.56	C41 H81 O10 N1 P1	0	0	0	0	0	0	0	0	0	0	0	0	0	0	0	0	0	0	5.29835e+06	0	360899	0	2.19519e+06	0	237368	0	148520	0	0	0	0	0	1.56076e+06	0	1.72833e+06	0
0	PC(32:0)+H	PC(32:0)+H	PC	(16:0/16:0)	(16:0)	(16:0)			734.569	C40 H81 O8 N1 P1	0	39675.2	132597	0	47295.6	0	28937.6	0	0	0	0	0	0	0	0	0	0	0	1.32276e+09	0	194671	56056.4	967494	0	1.06076e+07	0	1.3366e+07	0	1.64807e+06	0	4.65401e+06	0	2.63663e+07	0	7.58039e+06	0
0	PC(16:0/16:0)+HCOO	PC(32:0)+HCOO	PC	(16:0/16:0)	(16:0)	(16:0)			778.56	C41 H81 O10 N1 P1	7.11958e+07	0	8.8998e+08	0	8.69669e+08	0	9.75262e+08	0	4.70872e+07	0	9.44209e+08	0	2.49707e+07	0	0	2.64708e+07	0	1.3822e+09	0	0	0	0	0	0	0	0	0	0	0	3.5795e+06	0	42250	0	0	0	0	778.561		778.562
0	PC(32:0)+H	PC(32:0)+H	PC	(16:0/16:0)	(16:0)	(16:0)			734.569	C40 H81 O8 N1 P1	5.98997e+08	0	1.04556e+10	38591.9	9.42896e+09	0	1.04196e+10	0	3.16321e+08	38697	1.04481e+10	0	1.77699e+08	0	0	1.98768e+08	0	1.3081e+10	0	0	0	478902	0	0	0	0	0	0	0	7.8097e+07	0	8.19139e+06	0	0	0	0	734.568		734.568
0	PC(16:0/16:0)+HCOO	PC(32:0)+HCOO	PC	(16:0/16:0)	(16:0)	(16:0)			778.56	C41 H81 O10 N1 P1	0	0	4.37099e+06	0	1.89614e+06	0	214508	0	0	0	550700	0	0	0	0	0	0	7.78994e+06	0	0	0	0	0	0	0	0	0	0	0	0	0	3.56214e+08	0	0	0	0			778.56
0	PC(32:0)+H	PC(32:0)+H	PC	(16:0/16:0)	(16:0)	(16:0)			734.569	C40 H81 O8 N1 P1	5101.04	0	3.10689e+06	0	1.1295e+07	0	2.23097e+06	0	0	0	1.0973e+06	0	0	0	0	3583.51	0	1.33886e+06	0	0	0	0	0	0	0	0	0	0	0	1.52455e+06	0	5.78189e+09	0	0	0	0	734.569		734.569
0	PC(16:0/16:0)+HCOO	PC(32:0)+HCOO	PC	(16:0/16:0)	(16:0)	(16:0)			778.56	C41 H81 O10 N1 P1	714460	0	100725	0	2.72338e+07	0	3.8519e+07	0	488672	0	2.78531e+07	0	315659	0	0	0	0	2.49625e+06	0	0	0	0	0	0	0	0	0	0	0	1.30461e+09	0	2.58014e+06	0	0	0	0	778.56		778.56
0	PC(32:0)+H	PC(32:0)+H	PC	(16:0/16:0)	(16:0)	(16:0)			734.569	C40 H81 O8 N1 P1	85700.3	0	5.31173e+06	0	1.81137e+06	0	1.52017e+06	0	0	0	632205	0	0	0	0	140734	0	9.76277e+06	0	0	0	184189	0	0	0	0	0	2.14702e+06	0	1.71542e+10	0	5.97306e+09	0	0	0	0			734.569
0	PC(16:0/16:0)+HCOO	PC(32:0)+HCOO	PC	(16:0/16:0)	(16:0)	(16:0)			778.56	C41 H81 O10 N1 P1	0	0	0	0	0	0	0	0	0	0	0	0	0	0	0	0	0	0	0	0	0	0	0	0	0	123136	0	9.82289e+07	0	33612.9	0	0	0	0	0	0
0	PC(32:0)+H	PC(32:0)+H	PC	(16:0/16:0)	(16:0)	(16:0)			734.569	C40 H81 O8 N1 P1	0	0	1.52355e+06	0	298524	0	0	0	0	0	3424.78	0	0	0	0	0	0	134764	0	2776.35	0	3.46023e+06	0	3.01198e+06	0	1.12424e+07	0	1.41269e+09	0	157175	0	0	0	0	0	0			734.569
0	PC(16:0/16:0)+HCOO	PC(32:0)+HCOO	PC	(16:0/16:0)	(16:0)	(16:0)			778.56	C41 H81 O10 N1 P1	0	0	0	0	0	0	0	0	0	0	0	0	0	0	0	0	0	0	0	2103.95	0	697346	0	53347.6	0	9.14258e+08	0	192784	0	0	0	0	0	0	0	0
0	PC(32:0)+H	PC(32:0)+H	PC	(16:0/16:0)	(16:0)	(16:0)			734.569	C40 H81 O8 N1 P1	0	0	8327.52	0	0	0	14393.6	0	0	0	6711.72	0	0	0	0	0	0	0	0	1.67135e+07	0	1.74865e+07	0	5.89629e+07	0	1.4598e+10	0	537454	0	1.91604e+06	0	0	0	0	0	512915			734.569
0	PC(16:0/16:0)+HCOO	PC(32:0)+HCOO	PC	(16:0/16:0)	(16:0)	(16:0)			778.56	C41 H81 O10 N1 P1	0	0	0	0	0	0	0	0	0	0	0	0	0	0	0	0	0	0	0	4.72357e+08	0	6.83221e+08	0	1.04529e+09	0	3.34853e+07	0	0	0	0	0	0	0	0	0	43826.1
0	PC(32:0)+H	PC(32:0)+H	PC	(16:0/16:0)	(16:0)	(16:0)			734.569	C40 H81 O8 N1 P1	0	0	344584	0	0	0	289759	0	0	0	0	0	0	0	0	0	0	269038	0	8.61695e+09	0	1.10897e+10	0	1.50305e+10	0	3.71304e+07	0	445871	0	966923	0	461714	0	1.46331e+06	0	7.35547e+06			734.569
1	PC(16:0/16:0)+HCOO	PC(32:0)+HCOO	PC	(16:0/16:0)	(16:0)	(16:0)			778.56	C41 H81 O10 N1 P1	0	0	0	0	0	0	0	0	0	0	0	0	0	0	0	0	0	0	0	108824	0	3.99041e+06	0	483173	0	0	0	0	0	169.878	0	0	0	851408	0	9.36993e+07
1	PC(32:0)+H	PC(32:0)+H	PC	(16:0/16:0)	(16:0)	(16:0)			734.569	C40 H81 O8 N1 P1	0	0	101983	0	3058.59	0	0	0	0	0	0	0	0	0	0	0	0	6804.95	0	7.39051e+06	0	3.10372e+06	0	2.83608e+07	0	743.001	0	0	0	1.01489e+06	0	0	0	6.63883e+06	0	1.84795e+09			734.569
0	PC(16:0/16:0)+HCOO	PC(32:0)+HCOO	PC	(16:0/16:0)	(16:0)	(16:0)			778.56	C41 H81 O10 N1 P1	0	0	1353.23	0	78751.1	0	0	0	0	0	63911.8	0	0	0	0	0	0	117880	0	1311.7	0	954.158	0	194624	0	0	0	0	0	0	0	0	0	5.41382e+07	0	930303			778.56
0	PC(32:0)+H	PC(32:0)+H	PC	(16:0/16:0)	(16:0)	(16:0)			734.569	C40 H81 O8 N1 P1	3.19963e+08	0	6.48535e+09	0	1.6402e+09	0	1.43229e+07	0	2.10198e+08	105533	6.29616e+08	0	4.91984e+06	428112	0	2.04046e+08	0	1.31696e+10	34321.9	9.10284e+09	0	1.15226e+10	170371	1.54379e+10	13505.8	1.50904e+10	77539.2	1.45927e+09	0	1.75795e+10	0	5.99146e+09	0	5.26506e+09	0	1.88761e+09
0	PC(16:0e/16:0)+HCOO	PC(32:0e)+HCOO	PC	(16:0e/16:0)	(16:0e)	(16:0)			764.581	C41 H83 O9 N1 P1	202888	0	1.30933e+06	0	1.26907e+07	0	1.468e+07	0	106568	0	1.51094e+07	0	0	0	0	0	0	2.28466e+07	0	0	0	0	0	0	0	0	0	0	0	0	0	0	0	0	0	0	764.581		764.582
0	PC(32:0e)+H	PC(32:0e)+H	PC	(16:0e/16:0)	(16:0e)	(16:0)			720.59	C40 H83 O7 N1 P1	5.03752e+06	0	2.43088e+08	0	1.9666e+08	0	2.28201e+08	0	2.8149e+06	0	1.65761e+08	0	872571	0	0	1.42659e+06	0	4.01189e+08	0	0	0	0	0	0	0	0	0	0	0	391093	0	0	0	0	0	0	720.589		720.59
0	PC(16:0e/16:0)+HCOO	PC(32:0e)+HCOO	PC	(16:0e/16:0)	(16:0e)	(16:0)			764.581	C41 H83 O9 N1 P1	0	0	0	0	0	0	0	0	0	0	0	0	0	0	0	0	0	0	0	0	0	0	0	0	0	0	0	0	0	0	0	4.54239e+06	0	0	0	0
0	PC(32:0e)+H	PC(32:0e)+H	PC	(16:0e/16:0)	(16:0e)	(16:0)			720.59	C40 H83 O7 N1 P1	4395.89	0	119881	0	0	0	0	0	0	0	0	0	0	0	0	0	0	264144	0	0	0	0	0	0	0	0	0	3096.55	0	0	0	5.46619e+07	0	0	0	0	720.59		720.59
0	PC(16:0e/16:0)+HCOO	PC(32:0e)+HCOO	PC	(16:0e/16:0)	(16:0e)	(16:0)			764.581	C41 H83 O9 N1 P1	0	0	0	0	0	0	0	0	0	0	0	0	0	0	0	0	0	0	0	0	0	0	0	0	0	0	0	0	0	2.11434e+07	0	0	0	0	0	0
0	PC(32:0e)+H	PC(32:0e)+H	PC	(16:0e/16:0)	(16:0e)	(16:0)			720.59	C40 H83 O7 N1 P1	1.12991e+06	0	5.22706e+06	0	4.76097e+06	0	937334	39873.3	3988.68	0	3.58247e+06	0	179801	0	0	0	0	811224	0	0	0	0	0	0	0	0	0	0	0	5.69758e+08	0	0	0	0	0	0	720.59		720.59
0	PC(32:0e)+H	PC(32:0e)+H	PC	(32:0e)	(32:0e)				720.59	C40 H83 O7 N1 P1	0	0	0	0	0	0	0	0	0	0	0	0	0	0	0	0	0	0	0	0	0	0	0	0	0	0	0	1.78736e+07	0	1.14224e+06	0	0	0	0	0	0
0	PC(16:0e/16:0)+HCOO	PC(32:0e)+HCOO	PC	(16:0e/16:0)	(16:0e)	(16:0)			764.581	C41 H83 O9 N1 P1	0	0	0	0	0	0	0	0	0	0	0	0	0	0	0	0	0	0	0	0	0	0	0	0	0	1.18734e+07	0	0	0	0	0	0	0	0	0	0
0	PC(32:0e)+H	PC(32:0e)+H	PC	(16:0e/16:0)	(16:0e)	(16:0)			720.59	C40 H83 O7 N1 P1	0	0	0	0	0	0	0	0	0	1432.46	0	0	0	0	0	0	0	0	0	0	0	0	0	0	0	3.31561e+08	0	4.31241e+06	0	0	0	0	0	0	0	0
0	PC(16:0e/16:0)+HCOO	PC(32:0e)+HCOO	PC	(16:0e/16:0)	(16:0e)	(16:0)			764.581	C41 H83 O9 N1 P1	0	0	0	0	0	0	0	0	0	0	0	0	0	0	0	0	0	0	0	10256.9	0	8.23311e+06	0	1.12283e+07	0	0	0	0	0	0	0	0	0	0	0	0
0	PC(32:0e)+H	PC(32:0e)+H	PC	(16:0e/16:0)	(16:0e)	(16:0)			720.59	C40 H83 O7 N1 P1	0	0	0	0	0	0	0	0	0	0	0	0	0	0	0	0	0	0	0	564925	0	2.42827e+08	0	4.67707e+08	0	0	0	1.41912e+06	0	0	0	0	0	0	0	0
0	PC(32:0e)+H	PC(32:0e)+H	PC	(32:0e)	(32:0e)				720.59	C40 H83 O7 N1 P1	0	0	0	0	0	0	0	0	0	0	0	0	0	0	0	0	0	0	0	0	0	814902	0	10700	0	0	0	0	0	0	0	0	0	0	0	1.64068e+07
0	PC(16:0p/16:0)+HCOO	PC(32:0p)+HCOO	PC	(16:0p/16:0)	(16:0p)	(16:0)			762.565	C41 H81 O9 N1 P1	75245.1	0	9.53717e+06	0	1.26203e+07	0	1.33227e+07	0	3237.3	0	1.1226e+07	0	0	0	0	0	0	5.83528e+06	0	0	0	0	0	0	0	0	0	0	0	1.03536e+06	0	0	0	0	0	0	762.565		762.565
1	PC(32:0p)+HCOO	PC(32:0p)+HCOO	PC	(32:0p)	(32:0p)				762.565	C41 H81 O9 N1 P1	0	0	213234	0	234829	0	32112.7	0	0	0	257719	0	0	0	0	0	0	23373.2	0	0	0	0	0	0	0	0	0	0	0	0	0	3.62274e+06	0	0	0	0			762.565
0	PC(16:0p/16:0)+HCOO	PC(32:0p)+HCOO	PC	(16:0p/16:0)	(16:0p)	(16:0)			762.565	C41 H81 O9 N1 P1	0	0	0	0	0	0	0	0	0	0	0	0	0	0	0	0	0	0	0	0	0	0	0	0	0	0	0	0	0	1.72574e+07	0	0	0	0	0	0
0	PC(16:0p/16:0)+HCOO	PC(32:0p)+HCOO	PC	(16:0p/16:0)	(16:0p)	(16:0)			762.565	C41 H81 O9 N1 P1	0	0	0	0	0	0	0	0	0	0	0	0	0	0	0	0	0	0	0	0	0	2832.24	0	65239.2	0	9.89578e+06	0	0	0	0	0	0	0	0	0	0
0	PC(16:0p/16:0)+HCOO	PC(32:0p)+HCOO	PC	(16:0p/16:0)	(16:0p)	(16:0)			762.565	C41 H81 O9 N1 P1	0	0	0	0	0	0	0	0	0	0	0	0	0	0	0	0	0	0	0	5.76162e+06	0	7.33815e+06	0	1.59801e+07	0	86417.6	0	0	0	0	0	0	0	0	0	0
0	PC(32:1)+H	PC(32:1)+H	PC	(32:1)	(32:1)				732.554	C40 H79 O8 N1 P1	0	0	0	0	0	0	0	0	0	0	0	0	0	137514	0	0	0	0	0	0	0	0	0	0	0	0	4.20247e+06	0	93165.3	16197.5	2.325e+06	0	0	0	0	0
0	PC(16:0/16:1)+HCOO	PC(32:1)+HCOO	PC	(16:0/16:1)	(16:0)	(16:1)			776.545	C41 H79 O10 N1 P1	0	0	0	0	0	0	0	0	0	0	0	0	0	0	0	0	0	0	526529	0	152.135	0	53898.9	0	2.4256e+06	0	0	0	0	0	0	0	0	0	2201.57	0
0	PC(32:1)+H	PC(32:1)+H	PC	(16:0/16:1)	(16:0)	(16:1)			732.554	C40 H79 O8 N1 P1	0	0	0	0	0	0	0	0	0	0	0	0	0	0	0	0	0	0	1.22152e+07	0	243290	0	1.171e+06	0	920832	0	0	0	0	683859	0	0	0	0	1.23814e+06	0
0	PC(32:1)+H	PC(32:1)+H	PC	(32:1)	(32:1)				732.554	C40 H79 O8 N1 P1	181663	0	0	0	102589	0	0	0	1821.71	0	0	0	0	0	0	0	0	0	8478.9	0	0	0	0	0	2647.05	0	0	0	0	0	0	0	2.80078e+06	0	0	0	732.554
0	PC(16:0/16:1)+HCOO	PC(32:1)+HCOO	PC	(16:0/16:1)	(16:0)	(16:1)			776.545	C41 H79 O10 N1 P1	4.75188e+06	0	5.08122e+07	0	4.46143e+07	0	7.0694e+07	0	1.86486e+06	0	4.10709e+07	0	98868.9	0	0	306822	0	8.66342e+07	0	0	0	0	0	0	0	0	0	0	0	0	0	0	0	0	0	0	776.545		776.545
0	PC(32:1)+H	PC(32:1)+H	PC	(16:0/16:1)	(16:0)	(16:1)			732.554	C40 H79 O8 N1 P1	2.71227e+07	1.08763e+06	1.52481e+09	869684	8.48164e+08	0	1.12716e+09	0	1.53347e+07	0	6.36214e+08	0	1.0157e+07	0	0	216356	4.584e+06	1.16675e+09	0	378593	0	235035	0	0	0	0	0	0	0	95988.4	0	0	0	0	0	0	732.553	732.554	732.554
0	PC(16:0/16:1)+HCOO	PC(32:1)+HCOO	PC	(16:0/16:1)	(16:0)	(16:1)			776.545	C41 H79 O10 N1 P1	0	0	1.47623e+06	0	358290	0	133227	0	0	0	206777	0	0	0	0	0	0	2.94276e+06	0	0	0	0	0	0	0	0	0	0	0	0	0	1.17571e+07	0	0	0	0			776.545
0	PC(32:1)+H	PC(32:1)+H	PC	(16:0/16:1)	(16:0)	(16:1)			732.554	C40 H79 O8 N1 P1	661982	7.16962e+06	5.19207e+07	0	233536	0	344904	0	152518	0	2.18095e+07	0	0	0	0	267289	0	9.0859e+07	0	0	0	0	0	0	0	0	0	0	0	95889.8	0	1.7419e+08	0	0	0	122249	732.554	732.554	732.553
1	PC(18:1/14:0)+HCOO	PC(32:1)+HCOO	PC	(18:1/14:0)	(18:1)	(14:0)			776.545	C41 H79 O10 N1 P1	1.54571e+06	0	7.15104e+07	0	8.19079e+07	0	9.51551e+07	0	2.06919e+06	0	7.39719e+07	0	596684	0	0	0	0	6.40408e+06	0	0	0	0	0	0	0	0	0	0	0	1.08275e+08	0	162823	0	0	0	0
0	PC(32:1)+H	PC(32:1)+H	PC	(32:1)	(32:1)				732.554	C40 H79 O8 N1 P1	0	0	2.98053e+06	0	4.45644e+06	0	3.17181e+06	0	0	0	3.58109e+06	0	0	0	82011.2	0	0	0	0	0	0	0	0	0	29988.2	0	0	0	0	6.13145e+07	872973	0	0	0	0	0			732.554
0	PC(16:0/16:1)+HCOO	PC(32:1)+HCOO	PC	(16:0/16:1)	(16:0)	(16:1)			776.545	C41 H79 O10 N1 P1	0	0	0	0	0	0	0	0	0	0	0	0	0	0	0	0	0	0	0	0	0	0	0	0	0	0	0	4.43263e+06	0	9.93867e+07	0	1358.76	0	0	0	0
0	PC(32:1)+H	PC(32:1)+H	PC	(16:0/16:1)	(16:0)	(16:1)			732.554	C40 H79 O8 N1 P1	0	0	330627	37535.2	224989	0	0	0	0	0	28860.5	0	0	0	0	0	20538.4	616149	134027	152328	47949.7	0	56864.7	0	208589	77782.1	168205	5.49479e+07	0	1.03752e+07	0	0	0	0	0	0			732.554
0	PC(16:0/16:1)+HCOO	PC(32:1)+HCOO	PC	(16:0/16:1)	(16:0)	(16:1)			776.545	C41 H79 O10 N1 P1	0	0	0	0	0	0	0	0	0	0	0	0	0	0	0	0	0	0	0	0	0	0	0	0	0	3.75995e+07	0	0	0	0	0	0	0	0	0	0
0	PC(32:1)+H	PC(32:1)+H	PC	(16:0/16:1)	(16:0)	(16:1)			732.554	C40 H79 O8 N1 P1	0	0	0	0	0	0	0	0	0	0	0	0	0	0	0	0	154776	0	350670	0	778520	0	1.62291e+06	0	2.12646e+06	7.64293e+08	1.35418e+07	0	0	1.2374e+06	0	0	1.55211e+06	0	650825	0
0	PC(16:0/16:1)+HCOO	PC(32:1)+HCOO	PC	(16:0/16:1)	(16:0)	(16:1)			776.545	C41 H79 O10 N1 P1	0	0	0	0	0	0	0	0	0	0	0	0	0	0	0	0	0	0	0	2.41012e+07	0	5.09802e+07	0	9.12888e+07	0	231686	0	2.91795e+06	0	32129.8	0	0	0	0	0	0
0	PC(32:1)+H	PC(32:1)+H	PC	(16:0/16:1)	(16:0)	(16:1)			732.554	C40 H79 O8 N1 P1	0	0	0	38479.7	0	0	0	0	0	0	0	0	0	0	0	0	0	0	0	5.15232e+08	0	9.61688e+08	0	1.13641e+09	0	1.21818e+07	0	263534	0	0	0	0	0	0	0	76152.1
0	PC(16:0/16:1)+HCOO	PC(32:1)+HCOO	PC	(16:0/16:1)	(16:0)	(16:1)			776.545	C41 H79 O10 N1 P1	0	0	0	0	0	0	0	0	0	0	0	0	0	0	0	0	0	0	0	4398.91	0	4.86654e+07	0	8.87986e+07	0	536426	0	0	0	0	0	0	0	0	0	4.02625e+06
0	PC(32:1)+H	PC(32:1)+H	PC	(16:0/16:1)	(16:0)	(16:1)			732.554	C40 H79 O8 N1 P1	0	0	0	0	0	0	0	0	0	0	0	0	0	0	86715.6	0	0	0	0	536105	0	676522	0	2.03725e+06	0	1414.78	0	0	0	0	77952.4	0	0	0	0	6.01848e+07
0	PC(16:0/16:1)+HCOO	PC(32:1)+HCOO	PC	(16:0/16:1)	(16:0)	(16:1)			776.545	C41 H79 O10 N1 P1	0	0	0	0	0	0	0	0	0	0	0	0	0	0	0	0	0	0	0	383660	0	0	0	0	0	0	0	0	0	0	0	0	0	5.02945e+06	0	4.0813e+06
0	PC(32:1)+H	PC(32:1)+H	PC	(16:0/16:1)	(16:0)	(16:1)			732.554	C40 H79 O8 N1 P1	0	0	0	0	0	0	0	0	0	0	0	0	0	0	0	0	43287.6	0	0	16112.8	16129	1557.95	0	0	0	0	22751.7	0	0	0	0	0	0	1.62947e+08	0	0
0	PC(32:1)+H	PC(32:1)+H	PC	(32:1)	(32:1)				732.554	C40 H79 O8 N1 P1	0	0	67867.1	0	0	0	0	0	0	0	0	4.68996e+06	0	750808	0	0	0	0	0	0	0	0	0	0	0	0	0	0	0	0	0	0	0	19270	0	0			732.554
0	PC(32:1e)+H	PC(32:1e)+H	PC	(32:1e)	(32:1e)				718.575	C40 H81 O7 N1 P1	0	0	5.89209e+06	0	7.49383e+06	0	1.58605e+07	0	0	0	6.73951e+06	70371	0	0	0	0	0	2.26789e+07	0	0	0	0	0	0	0	0	0	0	0	3.15373e+06	0	169311	0	0	0	0			718.573
1	PC(32:1e)+H	PC(32:1e)+H	PC	(32:1e)	(32:1e)				718.575	C40 H81 O7 N1 P1	4.14554e+06	0	1.77249e+08	65473.9	1.41854e+08	0	7.88773e+07	0	2.8292e+06	0	1.26433e+08	0	1.15784e+06	0	0	1.08958e+06	39920.7	2.71006e+08	0	0	0	0	0	0	0	0	0	1.77273e+06	0	4.43816e+07	0	202703	0	0	0	0	718.575		718.575
0	PC(32:1e)+H	PC(32:1e)+H	PC	(32:1e)	(32:1e)				718.575	C40 H81 O7 N1 P1	0	0	4136.2	0	499514	0	0	0	0	0	107943	0	0	0	0	0	0	3599.06	0	0	0	0	0	0	0	0	0	0	0	0	0	4.06232e+07	0	0	0	0			718.575
1	PC(32:1e)+H	PC(32:1e)+H	PC	(32:1e)	(32:1e)				718.575	C40 H81 O7 N1 P1	0	0	0	0	0	0	0	0	0	0	0	0	0	0	0	0	0	0	0	0	0	1.92628e+07	2507.56	1.76094e+07	0	2.7413e+08	0	0	0	0	0	0	0	0	0	0
1	PC(32:1e)+H	PC(32:1e)+H	PC	(32:1e)	(32:1e)				718.575	C40 H81 O7 N1 P1	0	0	0	0	0	0	0	0	0	0	0	0	0	0	0	0	0	0	0	1.1238e+08	0	1.96448e+08	0	3.99468e+08	0	641874	0	0	0	0	0	0	0	848145	0	0
0	PC(32:1e)+H	PC(32:1e)+H	PC	(32:1e)	(32:1e)				718.575	C40 H81 O7 N1 P1	0	0	0	0	0	0	0	0	0	157770	0	0	0	0	0	0	0	0	0	0	0	0	0	0	0	0	0	0	0	0	0	0	0	4.85951e+07	0	0
0	PC(32:3)+H	PC(32:3)+H	PC	(32:3)	(32:3)				728.522	C40 H75 O8 N1 P1	0	0	2.09584e+06	0	8.99742e+06	0	1.06898e+07	0	0	0	71776.7	0	0	0	0	0	0	0	0	3316.03	0	0	0	0	0	0	0	2.01277e+06	0	104004	0	861577	0	0	0	0			728.522
0	PC(32:3)+H	PC(32:3)+H	PC	(32:3)	(32:3)				728.522	C40 H75 O8 N1 P1	0	0	0	0	0	0	0	0	0	0	0	153341	0	1961.39	0	0	0	0	0	109280	0	0	0	0	0	3.39301e+06	0	0	0	0	0	0	0	0	0	0
0	PC(32:3)+H	PC(32:3)+H	PC	(32:3)	(32:3)				728.522	C40 H75 O8 N1 P1	0	0	0	0	0	56794.7	0	526202	0	552306	0	0	0	0	26096.2	0	30525.6	0	0	4.14971e+06	0	1.25609e+07	0	1.52546e+07	0	0	0	311897	0	0	75829.9	0	186595	0	0	0
0	PC(33:0)+H	PC(33:0)+H	PC	(33:0)	(33:0)				748.585	C41 H83 O8 N1 P1	156962	34108	1.75271e+07	69436.9	1.66774e+07	0	1.71534e+07	0	0	0	1.29009e+07	0	7941.9	0	0	0	0	9.99196e+06	0	0	0	0	0	0	0	0	0	0	0	0	0	967916	0	0	0	0	748.585	748.585	748.585
0	PC(33:0)+H	PC(33:0)+H	PC	(33:0)	(33:0)				748.585	C41 H83 O8 N1 P1	49601	0	22159.7	0	82076.8	0	49941.3	0	334232	0	919061	83684.2	0	0	0	55422.7	0	148318	0	0	0	0	0	0	0	1.55091e+06	0	1.90325e+06	0	5.11423e+07	0	1.6177e+07	0	0	0	0			748.585
0	PC(33:1)+H	PC(33:1)+H	PC	(33:1)	(33:1)				746.569	C41 H81 O8 N1 P1	0	0	0	0	76569.1	0	0	0	0	0	0	0	0	0	0	0	0	0	4.24351e+06	0	1216.55	0	0	0	1747.85	0	0	0	0	0	0	0	0	0	0	0
0	PC(17:1/16:0)+HCOO	PC(33:1)+HCOO	PC	(17:1/16:0)	(17:1)	(16:0)			790.56	C42 H81 O10 N1 P1	0	0	6.85686e+06	0	8.05622e+06	0	5.59665e+06	0	105890	0	5.67216e+06	0	0	0	0	0	0	4.76317e+06	0	0	0	0	0	0	0	0	0	0	0	0	0	0	0	0	0	0			790.562
0	PC(17:1/16:0)+H	PC(33:1)+H	PC	(17:1/16:0)	(17:1)	(16:0)			746.569	C41 H81 O8 N1 P1	3.10841e+06	35128.6	1.4799e+08	760061	1.53507e+08	45493.7	1.28458e+08	82422.3	2.01174e+06	84024.4	1.18044e+08	0	1.04442e+06	0	0	712762	1.14558e+06	2.39158e+08	0	0	0	0	0	0	0	0	0	0	0	0	0	0	0	0	0	0	746.569	746.569	746.569
0	PC(33:1)+H	PC(33:1)+H	PC	(33:1)	(33:1)				746.569	C41 H81 O8 N1 P1	1.01211e+06	475885	1.63401e+07	1.83933e+06	2.24379e+07	0	1.15577e+07	0	100233	0	1.18793e+07	0	0	0	0	0	278758	4.31778e+06	0	0	0	0	0	0	0	0	0	0	0	0	0	2.3342e+07	0	0	0	0	746.569	746.569	746.569
0	PC(17:1/16:0)+HCOO	PC(33:1)+HCOO	PC	(17:1/16:0)	(17:1)	(16:0)			790.56	C42 H81 O10 N1 P1	2961.02	0	1.02699e+07	0	460547	0	307271	0	1931.23	0	4.20677e+06	0	0	0	0	0	0	3.17879e+07	0	0	0	0	0	0	0	0	0	0	0	1.52747e+07	0	2.30023e+07	0	0	0	0	790.56		790.56
0	PC(33:1)+H	PC(33:1)+H	PC	(17:1/16:0)	(17:1)	(16:0)			746.569	C41 H81 O8 N1 P1	0	0	3554.09	0	7545.69	0	779205	0	0	0	345905	0	0	0	0	0	0	60385.3	0	0	0	0	0	0	0	0	0	0	0	3.19311e+08	0	1.68604e+06	0	0	0	0			746.569
0	PC(17:1/16:0)+HCOO	PC(33:1)+HCOO	PC	(17:1/16:0)	(17:1)	(16:0)			790.56	C42 H81 O10 N1 P1	0	0	0	0	0	0	0	0	0	0	0	0	0	0	0	0	0	0	0	0	0	0	0	0	0	3.28967e+06	0	243163	0	0	0	0	0	0	0	0
0	PC(17:1/16:0)+H	PC(33:1)+H	PC	(17:1/16:0)	(17:1)	(16:0)			746.569	C41 H81 O8 N1 P1	0	0	0	0	0	0	0	0	0	0	0	0	0	0	0	0	0	256021	65232.5	0	22583.3	0	1.15011e+06	0	472427	1.40581e+08	182078	2553.35	0	0	0	0	102337	0	280176	0
0	PC(17:1/16:0)+HCOO	PC(33:1)+HCOO	PC	(17:1/16:0)	(17:1)	(16:0)			790.56	C42 H81 O10 N1 P1	0	0	0	0	0	0	0	0	0	0	0	0	0	0	0	0	0	0	0	496.267	0	1.93226e+06	0	7.38292e+06	0	165242	0	0	0	0	0	0	0	0	0	0
0	PC(18:0/16:0)+HCOO	PC(34:0)+HCOO	PC	(18:0/16:0)	(18:0)	(16:0)			806.592	C43 H85 O10 N1 P1	0	5.43218e+06	0	956742	0	0	0	0	0	0	0	0	0	0	6.9796e+06	0	882413	0	0	0	0	0	0	0	0	0	0	0	0	0	0	0	0	0	0	0		806.589
0	PC(34:0)+H	PC(34:0)+H	PC	(18:0/16:0)	(18:0)	(16:0)			762.601	C42 H85 O8 N1 P1	0	8.70032e+07	0	4.8878e+07	0	0	0	68062.9	0	0	0	0	0	722941	1.19207e+08	0	2.06889e+06	0	0	70210.7	0	573174	0	0	0	0	0	0	0	0	0	0	0	0	0	1.14881e+06		762.6
0	PC(18:0/16:0)+HCOO	PC(34:0)+HCOO	PC	(18:0/16:0)	(18:0)	(16:0)			806.592	C43 H85 O10 N1 P1	0	0	0	0	0	0	0	0	0	0	0	0	0	0	0	0	0	0	0	0	0	0	0	0	0	0	9.04208e+06	0	767991	0	3.00097e+06	0	0	0	0	0
0	PC(34:0)+H	PC(34:0)+H	PC	(18:0/16:0)	(18:0)	(16:0)			762.601	C42 H85 O8 N1 P1	0	113664	0	0	0	0	0	0	0	0	0	0	0	0	126604	0	0	0	0	0	0	0	62009.6	0	12532	0	1.05888e+08	0	5.95444e+07	0	2.54309e+07	0	0	0	299677	0		762.601
0	PC(18:0/16:0)+HCOO	PC(34:0)+HCOO	PC	(18:0/16:0)	(18:0)	(16:0)			806.592	C43 H85 O10 N1 P1	0	0	0	0	0	0	0	0	0	0	0	0	0	0	314.27	0	0	0	509851	0	746.315	0	0	0	36918.1	0	0	0	0	0	0	0	483.005	0	667072	0
0	PC(34:0)+H	PC(34:0)+H	PC	(18:0/16:0)	(18:0)	(16:0)			762.601	C42 H85 O8 N1 P1	0	0	0	0	0	0	0	0	0	0	0	0	0	0	0	0	0	0	3.22344e+07	0	2.04096e+06	0	6.62677e+06	0	131476	0	376706	0	73639.5	0	222395	0	9.67293e+06	0	307033	0
0	PC(34:0)+H	PC(34:0)+H	PC	(34:0)	(34:0)				762.601	C42 H85 O8 N1 P1	0	0	0	0	0	0	0	0	0	0	0	0	0	0	0	0	0	0	84043.7	0	722454	0	74451	0	251166	0	328227	0	0	0	65385.4	0	6.58689e+06	0	5.44667e+06	0
0	PC(18:0/16:0)+HCOO	PC(34:0)+HCOO	PC	(18:0/16:0)	(18:0)	(16:0)			806.592	C43 H85 O10 N1 P1	1.63762e+07	0	3.76164e+08	0	2.74384e+08	0	3.25463e+08	0	9.26703e+06	0	3.83046e+08	0	6.21633e+06	0	0	5.64442e+06	0	5.89314e+08	0	0	0	0	0	0	0	0	0	0	0	1.3707e+08	0	720527	0	0	0	0	806.593		806.592
0	PC(34:0)+H	PC(34:0)+H	PC	(18:0/16:0)	(18:0)	(16:0)			762.601	C42 H85 O8 N1 P1	1.14496e+08	0	4.05092e+09	0	3.37278e+09	0	3.58028e+09	0	6.99672e+07	0	3.50991e+09	0	4.36037e+07	0	0	5.01717e+07	8567.65	6.45168e+09	0	0	0	0	0	0	0	0	0	0	0	1.49144e+09	0	1.82105e+07	0	0	0	0	762.6		762.599
0	PC(18:0/16:0)+HCOO	PC(34:0)+HCOO	PC	(18:0/16:0)	(18:0)	(16:0)			806.592	C43 H85 O10 N1 P1	0	0	685.607	0	1479.17	0	2680.18	0	0	0	564.599	0	0	0	0	0	0	72621.6	0	0	0	0	0	0	0	0	0	0	0	0	0	1.25868e+08	0	0	0	0			806.592
0	PC(34:0)+H	PC(34:0)+H	PC	(18:0/16:0)	(18:0)	(16:0)			762.601	C42 H85 O8 N1 P1	0	0	385852	0	101663	0	82759.9	0	0	0	184649	0	0	0	0	0	0	5.60741e+06	0	0	0	0	0	0	0	0	0	0	0	88848.9	0	1.48815e+09	0	0	0	0			762.601
0	PC(18:0/16:0)+HCOO	PC(34:0)+HCOO	PC	(18:0/16:0)	(18:0)	(16:0)			806.592	C43 H85 O10 N1 P1	0	0	0	0	2340.1	0	0	0	0	0	3694.26	0	0	0	0	0	0	97710.7	0	0	0	0	0	0	0	0	0	0	0	5.0318e+08	0	0	0	0	0	0
0	PC(18:0/16:0)+HCOO	PC(34:0)+HCOO	PC	(18:0/16:0)	(18:0)	(16:0)			806.592	C43 H85 O10 N1 P1	0	0	0	0	0	0	0	0	0	0	0	0	0	0	0	0	0	0	0	0	0	934.99	0	1098.55	0	9.71394e+07	0	2.98535e+07	0	0	0	0	0	0	0	0
0	PC(34:0)+H	PC(34:0)+H	PC	(18:0/16:0)	(18:0)	(16:0)			762.601	C42 H85 O8 N1 P1	0	0	0	0	0	0	193520	0	0	0	0	0	0	0	0	0	0	0	0	0	0	10785.6	0	9049.93	0	1.1141e+09	0	4.58672e+08	0	13569.9	0	0	0	0	0	0
0	PC(18:0/16:0)+HCOO	PC(34:0)+HCOO	PC	(18:0/16:0)	(18:0)	(16:0)			806.592	C43 H85 O10 N1 P1	0	0	0	0	0	0	0	0	0	0	0	0	0	0	0	0	0	0	0	0	0	7.66135e+07	0	7.69767e+07	0	2.7885e+08	0	0	0	0	0	0	0	0	0	0
0	PC(34:0)+H	PC(34:0)+H	PC	(18:0/16:0)	(18:0)	(16:0)			762.601	C42 H85 O8 N1 P1	0	0	0	0	0	0	6604.24	0	0	0	0	0	0	0	0	0	0	7269.01	12480.4	4.9426e+07	18911.6	9.37349e+08	0	8.97268e+08	0	5.53683e+09	39464.1	0	0	242674	0	0	0	0	0	4709.39
0	PC(18:0/16:0)+HCOO	PC(34:0)+HCOO	PC	(18:0/16:0)	(18:0)	(16:0)			806.592	C43 H85 O10 N1 P1	0	0	0	0	0	0	0	0	0	0	0	0	0	0	0	0	0	0	0	1.5958e+08	0	2.16022e+08	0	3.86485e+08	0	526017	0	111315	0	0	0	0	0	7967.42	0	1.06921e+07
0	PC(34:0)+H	PC(34:0)+H	PC	(18:0/16:0)	(18:0)	(16:0)			762.601	C42 H85 O8 N1 P1	0	0	63749.4	0	73648.6	0	0	0	0	0	0	0	0	0	0	0	0	167401	0	3.17238e+09	0	4.68266e+09	0	7.35399e+09	0	2.83822e+06	0	0	0	418494	0	0	0	95273.9	0	1.79707e+08
0	PC(18:0/16:0)+HCOO	PC(34:0)+HCOO	PC	(18:0/16:0)	(18:0)	(16:0)			806.592	C43 H85 O10 N1 P1	0	0	0	0	0	0	0	0	0	0	0	0	0	0	0	0	0	0	0	1.32695e+06	0	172948	0	614060	0	109958	0	0	0	111785	0	0	0	4008.89	0	3.73432e+07
0	PC(34:0)+H	PC(34:0)+H	PC	(18:0/16:0)	(18:0)	(16:0)			762.601	C42 H85 O8 N1 P1	0	0	667877	0	460074	0	211949	0	0	0	313234	0	0	0	0	0	0	119608	0	1.0419e+07	0	2.98536e+06	0	6.6639e+06	0	1.68588e+06	0	0	0	234184	0	0	0	1.60138e+08	0	5.11037e+08			762.601
0	PC(18:0e/16:0)+HCOO	PC(34:0e)+HCOO	PC	(18:0e/16:0)	(18:0e)	(16:0)			792.612	C43 H87 O9 N1 P1	171186	0	5.83075e+06	0	3.61125e+06	0	6.49318e+06	0	0	0	4.18718e+06	0	0	0	0	0	0	8.29033e+06	0	0	0	0	0	0	0	0	0	0	0	447824	0	0	0	0	0	0	792.612		792.613
0	PC(34:0e)+H	PC(34:0e)+H	PC	(18:0e/16:0)	(18:0e)	(16:0)			748.621	C42 H87 O7 N1 P1	2.15788e+06	0	7.89055e+07	0	6.47447e+07	0	6.24629e+07	0	5475.29	0	6.17082e+07	0	174588	0	0	0	0	5.39971e+07	0	0	0	0	0	0	0	0	0	0	0	0	0	0	0	0	0	0	748.621		748.62
0	PC(18:0e/16:0)+HCOO	PC(34:0e)+HCOO	PC	(18:0e/16:0)	(18:0e)	(16:0)			792.612	C43 H87 O9 N1 P1	0	0	0	0	0	0	0	0	0	0	0	0	0	0	0	0	0	0	0	0	0	0	0	0	0	0	0	0	0	0	0	2.43538e+06	0	0	0	0
0	PC(34:0e)+H	PC(34:0e)+H	PC	(18:0e/16:0)	(18:0e)	(16:0)			748.621	C42 H87 O7 N1 P1	0	0	0	0	0	0	0	0	0	0	0	0	0	0	0	0	0	0	0	0	0	0	0	0	0	0	0	0	0	0	0	2.77393e+07	0	0	0	0
0	PC(18:0e/16:0)+HCOO	PC(34:0e)+HCOO	PC	(18:0e/16:0)	(18:0e)	(16:0)			792.612	C43 H87 O9 N1 P1	0	0	0	0	0	0	0	0	0	0	0	0	0	0	0	0	0	0	0	0	0	0	0	0	0	0	0	0	0	1.1704e+07	0	0	0	0	0	0
0	PC(34:0e)+H	PC(34:0e)+H	PC	(18:0e/16:0)	(18:0e)	(16:0)			748.621	C42 H87 O7 N1 P1	0	0	0	0	4627.86	0	0	0	0	0	0	0	0	0	0	0	0	5863.32	0	0	0	0	0	0	0	0	0	0	0	2.7239e+08	0	0	0	0	0	0
0	PC(18:0e/16:0)+HCOO	PC(34:0e)+HCOO	PC	(18:0e/16:0)	(18:0e)	(16:0)			792.612	C43 H87 O9 N1 P1	0	0	0	0	0	0	0	0	0	0	0	0	0	0	0	0	0	0	0	420549	0	2.48551e+06	0	6.3056e+06	0	5.1224e+06	0	0	0	0	0	0	0	0	0	0
0	PC(34:0e)+H	PC(34:0e)+H	PC	(18:0e/16:0)	(18:0e)	(16:0)			748.621	C42 H87 O7 N1 P1	0	0	0	0	0	0	0	0	0	0	0	0	0	0	0	0	0	0	0	9.80225e+06	0	9.66177e+07	0	2.17035e+08	0	1.22905e+08	41179.8	0	0	0	0	0	0	0	0	0
0	PC(34:0e)+HCOO	PC(34:0e)+HCOO	PC	(34:0e)	(34:0e)				792.612	C43 H87 O9 N1 P1	0	0	0	0	0	0	0	0	0	0	0	0	0	0	0	0	0	0	0	2.90769e+06	0	0	0	0	0	0	0	0	0	0	0	0	0	0	0	0
0	PC(34:0p)+HCOO	PC(34:0p)+HCOO	PC	(34:0p)	(34:0p)				790.597	C43 H85 O9 N1 P1	0	0	0	0	0	0	0	0	0	0	0	0	0	0	0	0	0	0	0	0	0	0	0	0	0	0	0	0	0	3.84039e+06	0	0	0	0	0	0
0	PC(18:0p/16:0)+HCOO	PC(34:0p)+HCOO	PC	(18:0p/16:0)	(18:0p)	(16:0)			790.597	C43 H85 O9 N1 P1	0	0	0	0	0	0	0	0	0	0	0	0	0	0	0	0	0	0	0	202872	0	2.11528e+07	0	3.28819e+07	0	1.4824e+06	0	0	0	0	0	0	0	0	0	0
1	PC(16:0/18:1)+HCOO	PC(34:1)+HCOO	PC	(16:0/18:1)	(16:0)	(18:1)			804.576	C43 H83 O10 N1 P1	0	1.54816e+06	0	67363	0	0	0	0	0	0	0	0	0	26250	2.77155e+06	0	1.46041e+06	0	2.97111e+07	0	1.14379e+07	0	5.59012e+06	0	2.8801e+07	0	2.08286e+07	0	2.70146e+07	0	4.49871e+07	0	6.22217e+06	0	1.65996e+07	286025		804.576
1	PC(34:1)+H	PC(34:1)+H	PC	(16:0/18:1)	(16:0)	(18:1)			760.585	C42 H83 O8 N1 P1	0	3.47908e+07	113524	7.17688e+06	67831.2	0	0	209475	36473.3	0	0	0	0	6.58682e+06	1.93211e+08	514659	4.7277e+07	129269	1.96145e+09	1.56922e+06	9.42274e+07	3.75996e+06	3.50439e+07	473682	6.93491e+07	0	6.84481e+08	242687	5.4614e+08	0	6.40019e+08	0	1.67792e+08	184106	2.88146e+07	1.14385e+07		760.584
1	PC(34:1)+H	PC(34:1)+H	PC	(34:1)	(34:1)				760.585	C42 H83 O8 N1 P1	0	4.58251e+07	128141	7.96189e+06	83398.6	0	0	209475	29738.1	0	0	0	0	2.50344e+06	1.93211e+08	603656	5.02676e+07	129269	1.96145e+09	54402.1	9.42274e+07	768802	3.50439e+07	454002	6.93491e+07	0	6.84481e+08	227703	5.4614e+08	0	6.40019e+08	0	1.67792e+08	40723.8	216229	9.62954e+06			760.585
1	PC(16:0/18:1)+HCOO	PC(34:1)+HCOO	PC	(16:0/18:1)	(16:0)	(18:1)			804.576	C43 H83 O10 N1 P1	0	1.35996e+06	0	67363	0	0	0	0	0	0	0	0	0	26250	2.74641e+06	0	1.46041e+06	0	2.97111e+07	0	1.14379e+07	0	5.59012e+06	0	2.8801e+07	0	3.19899e+06	0	3.83233e+06	0	4.5319e+07	0	6.22217e+06	0	1.65996e+07	493606
1	PC(34:1)+H	PC(34:1)+H	PC	(16:0/18:1)	(16:0)	(18:1)			760.585	C42 H83 O8 N1 P1	0	4.58251e+07	113524	934672	67831.2	0	0	232764	29738.1	0	0	0	0	56426.2	1.93211e+08	514659	5.02676e+07	129269	1.96145e+09	1.60824e+06	9.42274e+07	768802	3.50439e+07	454002	6.93491e+07	0	6.84156e+08	227703	2.42825e+08	0	1.32986e+07	0	1.67792e+08	48371.4	216229	9.62954e+06
1	PC(16:0/18:1)+HCOO	PC(34:1)+HCOO	PC	(16:0/18:1)	(16:0)	(18:1)			804.576	C43 H83 O10 N1 P1	0	47590.6	0	0	0	0	0	0	0	0	0	0	0	0	0	0	0	0	5.36701e+06	0	0	0	5.46464e+06	0	436005	0	1.89454e+07	0	148209	0	812908	0	0	0	38040.1	0
1	PC(34:1)+H	PC(34:1)+H	PC	(16:0/18:1)	(16:0)	(18:1)			760.585	C42 H83 O8 N1 P1	0	4.58251e+07	113524	934672	67831.2	0	0	232764	50836.2	0	0	0	0	56426.2	1.93211e+08	514659	5.02676e+07	129269	1.96145e+09	1.60824e+06	9.42274e+07	53951.1	3.50439e+07	454002	6.93491e+07	0	3.85061e+07	227703	5.4614e+08	0	6.51903e+08	0	1.67792e+08	53190.4	974016	9.62954e+06
0	PC(16:0/18:1)+HCOO	PC(34:1)+HCOO	PC	(16:0/18:1)	(16:0)	(18:1)			804.576	C43 H83 O10 N1 P1	0	0	0	0	0	0	0	0	0	0	0	0	0	0	0	0	0	0	9.91069e+06	0	778635	0	3.01912e+06	0	5.50391e+06	0	89881.6	0	78622.1	0	49685.4	0	46666.7	0	8.15426e+06	0
0	PC(34:1)+H	PC(34:1)+H	PC	(16:0/18:1)	(16:0)	(18:1)			760.585	C42 H83 O8 N1 P1	0	4.58251e+07	113524	7.96189e+06	67831.2	0	0	209475	50836.2	0	0	0	0	6.58682e+06	1.93211e+08	514659	5.02676e+07	129269	1.9339e+09	1.60824e+06	2.22176e+06	60777.9	4.07459e+06	454002	1.98882e+07	0	6.84481e+08	227703	5.4614e+08	0	6.40019e+08	0	1.66461e+08	269134	4.89566e+06	74329.6
0	PC(34:1)+H	PC(34:1)+H	PC	(34:1)	(34:1)				760.585	C42 H83 O8 N1 P1	0	0	0	0	0	0	0	0	0	0	0	0	0	0	0	0	0	0	1.16133e+06	0	453551	0	84989.9	0	1.18438e+06	0	399109	0	150312	0	182227	0	2.0242e+07	0	3.45332e+06	0
0	PC(16:0/18:1)+HCOO	PC(34:1)+HCOO	PC	(16:0/18:1)	(16:0)	(18:1)			804.576	C43 H83 O10 N1 P1	1.42426e+08	0	1.32403e+09	0	1.54089e+09	0	1.60552e+09	0	8.07345e+07	0	1.40642e+09	0	4.07636e+07	0	0	3.16883e+07	0	2.11988e+09	0	0	0	0	0	0	0	0	0	0	0	1.45663e+06	0	565985	0	0	0	0	804.577		804.577
0	PC(16:0/18:1)+H	PC(34:1)+H	PC	(16:0/18:1)	(16:0)	(18:1)			760.585	C42 H83 O8 N1 P1	1.23371e+09	7.89262e+06	1.6773e+10	1.21534e+07	1.71497e+10	3.64317e+06	1.64772e+10	2.91584e+06	5.85212e+08	90923.4	1.49988e+10	1.23382e+07	2.73107e+08	759431	49825.9	2.61477e+08	2.85203e+06	2.04709e+10	0	5.5621e+06	0	1.07115e+07	0	8.87876e+06	0	0	0	1.60614e+06	1.10211e+06	2.65502e+10	29450.2	8.2145e+09	0	1.01386e+06	0	1.50336e+06	760.585		760.584
1	PC(16:0/18:1)+HCOO	PC(34:1)+HCOO	PC	(16:0/18:1)	(16:0)	(18:1)			804.576	C43 H83 O10 N1 P1	0	0	5080.72	0	3271.57	0	1112.16	0	0	0	103925	0	0	0	0	0	0	1.21538e+06	0	0	0	0	0	0	0	0	0	0	0	0	0	4.86885e+08	0	0	0	0			804.576
1	PC(34:1)+H	PC(34:1)+H	PC	(16:0/18:1)	(16:0)	(18:1)			760.585	C42 H83 O8 N1 P1	1.26812e+09	1.51627e+06	1.68597e+10	8.2303e+06	1.73401e+10	3.69664e+06	1.76519e+10	2.83807e+06	5.98991e+08	73905.2	1.59698e+10	1.23382e+07	2.78289e+08	759431	0	2.71816e+08	8.51608e+06	2.09008e+10	0	267894	0	754121	0	9.15064e+06	0	0	0	170854	0	2.40363e+10	0	7.91364e+09	0	1.01386e+06	0	1.4384e+06		760.585
1	PC(16:0/18:1)+HCOO	PC(34:1)+HCOO	PC	(16:0/18:1)	(16:0)	(18:1)			804.576	C43 H83 O10 N1 P1	0	0	227921	0	1.2216e+06	0	481050	0	0	0	705429	0	0	0	0	0	0	490974	0	0	0	0	0	0	0	0	0	0	0	1.96732e+09	0	104755	0	0	0	0			804.576
1	PC(34:1)+H	PC(34:1)+H	PC	(16:0/18:1)	(16:0)	(18:1)			760.585	C42 H83 O8 N1 P1	1.2682e+09	6.299e+06	1.68882e+10	8.2303e+06	1.73557e+10	3.69664e+06	1.76565e+10	2.83807e+06	5.98991e+08	73905.2	1.59743e+10	1.23382e+07	2.78289e+08	759431	61361.8	2.71816e+08	8.51608e+06	2.09117e+10	0	267894	0	1.18024e+07	0	346375	0	0	0	1.60614e+06	1.10211e+06	2.57483e+10	29450.2	8.2145e+09	0	1.09171e+06	0	133269		760.585
0	PC(16:0/18:1)+HCOO	PC(34:1)+HCOO	PC	(16:0/18:1)	(16:0)	(18:1)			804.576	C43 H83 O10 N1 P1	0	0	104218	0	0	0	0	0	0	0	0	0	0	0	0	0	0	2097.47	0	0	0	0	0	0	0	2.62498e+06	0	1.56408e+08	0	1.11342e+06	0	0	0	0	0	0			804.576
0	PC(34:1)+H	PC(34:1)+H	PC	(16:0/18:1)	(16:0)	(18:1)			760.585	C42 H83 O8 N1 P1	0	0	1.85747e+06	0	252472	0	215412	6190.05	0	0	0	0	0	0	2.32238e+06	0	0	648085	0	0	0	1842.25	0	215666	0	6.00415e+07	0	2.27621e+09	0	1.95385e+06	1.66787e+06	7767.13	0	0	0	0			760.585
0	PC(16:0/18:1)+HCOO	PC(34:1)+HCOO	PC	(16:0/18:1)	(16:0)	(18:1)			804.576	C43 H83 O10 N1 P1	0	0	0	0	0	0	0	0	0	0	0	0	0	0	0	0	0	0	0	442040	0	3.08878e+06	0	4.76105e+06	0	1.32003e+09	0	495.369	0	65987.3	0	0	0	0	0	0
0	PC(34:1)+H	PC(34:1)+H	PC	(16:0/18:1)	(16:0)	(18:1)			760.585	C42 H83 O8 N1 P1	0	0	0	4053.92	8027.04	0	0	0	0	0	0	0	0	15042.7	0	0	1.00368e+06	0	115953	222432	381511	5.48231e+07	346756	8.44636e+07	32128.5	2.04268e+10	460696	422412	92492	20565.7	0	0	0	0	0	0
0	PC(16:0/18:1)+HCOO	PC(34:1)+HCOO	PC	(16:0/18:1)	(16:0)	(18:1)			804.576	C43 H83 O10 N1 P1	0	0	0	0	0	0	0	0	0	40246.3	0	0	0	15925.1	38637.4	0	0	0	0	6.95068e+08	0	1.10232e+09	0	1.46167e+09	0	1.05844e+06	0	0	0	169365	0	0	0	0	0	401151
0	PC(34:1)+H	PC(34:1)+H	PC	(16:0/18:1)	(16:0)	(18:1)			760.585	C42 H83 O8 N1 P1	0	0	264698	0	0	49757.5	1.02995e+06	0	0	0	0	0	0	140967	0	0	0	287899	589498	1.35675e+10	1.14007e+06	1.79533e+10	5.14832e+06	2.16598e+10	56901.8	2.81908e+07	1.07909e+07	0	0	660240	0	0	417338	0	709212	627429			760.585
0	PC(16:0/18:1)+HCOO	PC(34:1)+HCOO	PC	(16:0/18:1)	(16:0)	(18:1)			804.576	C43 H83 O10 N1 P1	0	0	0	0	0	0	0	0	0	0	0	0	0	0	61.201	0	0	0	0	544769	0	2.08283e+06	0	257114	0	120170	0	0	0	2216.84	0	0	0	122150	0	1.28568e+08
0	PC(34:1)+H	PC(34:1)+H	PC	(16:0/18:1)	(16:0)	(18:1)			760.585	C42 H83 O8 N1 P1	0	0	57930.9	0	73966.8	0	0	0	0	0	0	0	0	0	0	0	0	83189.1	0	1.12226e+07	0	2.1899e+07	0	3.42362e+06	0	3.75291e+06	0	0	0	11914.9	0	239037	151507	4128.18	0	2.87687e+09			760.585
0	PC(16:0/18:1)+HCOO	PC(34:1)+HCOO	PC	(16:0/18:1)	(16:0)	(18:1)			804.576	C43 H83 O10 N1 P1	0	0	48597.6	0	0	0	65099.4	0	0	0	60780.5	0	0	0	0	0	0	150558	0	101341	0	83581.4	0	290183	0	27803.4	0	0	0	2221.81	0	0	0	435606	0	122636			804.576
0	PC(34:1)+H	PC(34:1)+H	PC	(16:0/18:1)	(16:0)	(18:1)			760.585	C42 H83 O8 N1 P1	0	0	4.04602e+06	0	2.77823e+06	0	6.5296e+06	0	42939	0	644129	44047.6	0	195925	1.16227e+06	0	0	2.46674e+06	0	588785	0	990740	0	2.03856e+06	0	914799	0	0	0	555722	291296	0	0	7.45264e+09	0	1.51874e+06			760.585
0	PC(34:1e)+H	PC(34:1e)+H	PC	(34:1e)	(34:1e)				746.606	C42 H85 O7 N1 P1	0	1.3952e+06	0	1.6806e+06	0	0	0	0	0	0	0	0	0	0	814082	0	1.77977e+06	0	0	0	0	0	0	0	0	0	0	0	0	0	0	0	0	0	0	0		746.606
0	PC(16:0e/18:1)+H	PC(34:1e)+H	PC	(16:0e/18:1)	(16:0e)	(18:1)			746.606	C42 H85 O7 N1 P1	0	0	0	0	0	0	0	0	0	0	0	0	0	0	0	0	0	0	0	0	0	0	0	0	0	0	928393	0	0	0	1.53791e+06	0	0	0	0	0
0	PC(34:1e)+H	PC(34:1e)+H	PC	(34:1e)	(34:1e)				746.606	C42 H85 O7 N1 P1	0	0	0	0	0	0	0	0	0	0	0	0	0	0	0	0	0	0	7.38707e+06	0	0	0	19732.9	0	0	0	0	0	0	0	0	0	0	0	0	0
0	PC(34:1e)+H	PC(34:1e)+H	PC	(34:1e)	(34:1e)				746.606	C42 H85 O7 N1 P1	1.41188e+07	0	3.83427e+08	0	3.87289e+08	0	3.74745e+08	0	5.94746e+06	0	3.09953e+08	0	2.60799e+06	0	0	2.78026e+06	0	6.55286e+08	0	221432	0	0	0	0	0	0	0	0	0	1.27655e+06	0	462471	0	0	0	0	746.605		746.604
0	PC(34:1e)+H	PC(34:1e)+H	PC	(34:1e)	(34:1e)				746.606	C42 H85 O7 N1 P1	0	0	362247	0	1.03618e+07	0	1.89961e+07	0	0	0	950611	0	0	0	0	0	0	2.75737e+06	0	0	0	0	0	0	0	0	0	0	0	2.78008e+07	0	9.61495e+07	0	0	0	0			746.606
0	PC(34:1e)+H	PC(34:1e)+H	PC	(34:1e)	(34:1e)				746.606	C42 H85 O7 N1 P1	0	0	0	0	221084	0	223077	0	0	0	3554.07	0	0	0	0	0	0	1.68774e+07	0	0	0	0	0	0	0	0	0	0	0	1.08401e+09	0	109156	0	0	0	0
0	PC(34:1e)+H	PC(34:1e)+H	PC	(34:1e)	(34:1e)				746.606	C42 H85 O7 N1 P1	0	0	0	0	0	0	0	0	0	0	0	0	0	0	0	0	0	0	0	0	0	0	0	0	0	0	0	3.64022e+07	0	2.34836e+06	0	0	0	0	0	0
0	PC(34:1e)+H	PC(34:1e)+H	PC	(34:1e)	(34:1e)				746.606	C42 H85 O7 N1 P1	0	0	0	0	0	0	0	0	0	0	0	0	0	0	0	0	0	0	0	0	0	0	0	0	0	6.00725e+08	0	496748	0	0	0	0	0	0	0	0
1	PC(34:1e)+H	PC(34:1e)+H	PC	(34:1e)	(34:1e)				746.606	C42 H85 O7 N1 P1	0	0	0	0	0	0	0	0	0	0	0	0	0	0	0	0	0	0	0	3.00411e+08	0	5.90135e+08	0	9.88494e+08	0	3.65537e+07	0	0	0	0	0	0	0	0	0	0
1	PC(34:1e)+H	PC(34:1e)+H	PC	(34:1e)	(34:1e)				746.606	C42 H85 O7 N1 P1	0	0	0	0	0	0	0	0	0	0	0	0	0	0	0	0	0	0	0	1.44983e+07	0	0	0	0	0	0	0	0	0	0	0	0	0	0	0	2.76727e+07
0	PC(34:1e)+H	PC(34:1e)+H	PC	(34:1e)	(34:1e)				746.606	C42 H85 O7 N1 P1	1.396e+07	0	4.15444e+08	0	3.08393e+08	0	7.49372e+07	0	5.96855e+06	0	1.93994e+08	0	1.60825e+06	0	0	2.92404e+06	0	7.0082e+08	40722.7	3.24224e+08	0	6.62623e+08	0	1.11539e+09	0	6.66759e+08	0	3.78407e+07	0	1.21076e+09	0	1.05942e+08	0	1.38055e+08	0	3.1219e+07
0	PC(34:2)+H	PC(34:2)+H	PC	(34:2)	(34:2)				758.569	C42 H81 O8 N1 P1	0	0	0	0	0	0	0	0	0	0	0	0	0	0	0	0	0	0	0	0	0	0	0	0	0	0	2.36156e+07	0	1.00327e+07	0	773904	0	0	0	0	0
0	PC(16:0/18:2)+HCOO	PC(34:2)+HCOO	PC	(16:0/18:2)	(16:0)	(18:2)			802.56	C43 H81 O10 N1 P1	0	0	0	0	0	0	0	0	0	0	0	0	0	0	0	0	0	0	495883	0	13157.2	0	0	0	2.03046e+06	0	0	0	0	0	0	0	0	0	364961	0
0	PC(34:2)+H	PC(34:2)+H	PC	(16:0/18:2)	(16:0)	(18:2)			758.569	C42 H81 O8 N1 P1	0	0	0	0	0	0	0	0	0	0	0	0	0	0	0	0	0	0	204853	0	639605	0	1.50506e+06	0	1.05195e+06	0	0	0	0	0	0	0	1.9835e+06	0	2.16295e+06	0
0	PC(16:0/18:2)+HCOO	PC(34:2)+HCOO	PC	(16:0/18:2)	(16:0)	(18:2)			802.56	C43 H81 O10 N1 P1	3.03647e+06	0	1.18279e+07	0	1.06802e+07	0	8.08399e+06	0	1.8472e+06	0	1.25005e+07	0	1.24562e+06	0	0	479940	0	1.60553e+07	0	0	0	0	0	0	0	0	0	0	0	0	0	0	0	0	0	0	802.562		802.561
0	PC(34:2)+H	PC(34:2)+H	PC	(16:0/18:2)	(16:0)	(18:2)			758.569	C42 H81 O8 N1 P1	5.361e+06	0	1.32949e+08	0	1.30605e+08	1.10463e+06	1.1432e+08	2.93725e+06	1.1061e+06	2.71523e+06	1.25228e+08	0	1.30652e+06	0	0	1.0597e+07	0	1.60773e+08	0	0	0	0	0	0	0	1.26762e+07	0	0	0	0	0	0	0	2.31312e+06	0	0	758.569		758.568
0	PC(16:1/18:1)+HCOO	PC(34:2)+HCOO	PC	(16:1/18:1)	(16:1)	(18:1)			802.56	C43 H81 O10 N1 P1	0	0	64619.8	0	81025.9	0	99648.8	0	0	0	123316	0	0	0	0	0	0	0	0	0	0	0	0	0	0	0	0	0	0	1.68375e+07	0	1.03019e+06	0	0	0	0
0	PC(34:2)+H	PC(34:2)+H	PC	(16:1/18:1)	(16:1)	(18:1)			758.569	C42 H81 O8 N1 P1	2.08553e+06	7.78011e+06	1.49311e+07	6.75341e+06	1.45794e+07	0	2.57538e+07	77363.1	632739	0	2.16083e+07	1.0086e+06	353588	29077.3	0	212275	9.29909e+06	1.59097e+07	0	3.43252e+07	0	5.12229e+07	0	4.50475e+07	0	0	0	0	0	2.55395e+08	0	3.55416e+08	0	0	0	7.0441e+06	758.569	758.569	758.569
0	PC(16:0/18:2)+HCOO	PC(34:2)+HCOO	PC	(16:0/18:2)	(16:0)	(18:2)			802.56	C43 H81 O10 N1 P1	0	0	152996	0	198088	0	1.88866e+06	0	0	0	6256.09	0	0	0	0	0	0	247580	0	0	0	0	0	0	0	0	0	0	0	5.8588e+07	0	131636	0	0	0	0			802.56
0	PC(16:0/18:2)+HCOO	PC(34:2)+HCOO	PC	(16:0/18:2)	(16:0)	(18:2)			802.56	C43 H81 O10 N1 P1	0	0	0	0	0	0	0	0	0	0	0	0	0	0	0	0	0	0	0	0	0	0	0	0	0	0	0	3.62781e+06	0	512250	0	1686.59	0	0	0	0
0	PC(34:2)+H	PC(34:2)+H	PC	(16:0/18:2)	(16:0)	(18:2)			758.569	C42 H81 O8 N1 P1	155464	346240	274143	79108.1	404732	0	1.38714e+06	0	0	0	155230	1.26061e+07	0	584395	6.54425e+06	0	1.53245e+06	150284	0	0	0	192789	0	0	0	112529	0	4.72924e+07	1.27804e+06	1.21094e+06	3.27398e+06	0	0	0	0	0	758.569	758.569
0	PC(16:0/18:2)+HCOO	PC(34:2)+HCOO	PC	(16:0/18:2)	(16:0)	(18:2)			802.56	C43 H81 O10 N1 P1	0	0	0	0	0	0	0	0	0	0	0	0	0	0	0	0	0	0	0	0	0	0	0	0	0	5.87889e+06	0	0	0	2.2554e+06	0	0	0	0	0	0
0	PC(34:2)+H	PC(34:2)+H	PC	(16:0/18:2)	(16:0)	(18:2)			758.569	C42 H81 O8 N1 P1	0	66713.6	0	0	0	1.92069e+06	0	3.60321e+06	0	2.49228e+06	0	0	0	0	0	0	0	0	204826	87324.3	57148.9	0	2.41687e+06	0	205166	1.59451e+08	816939	9.57119e+06	3.7919e+06	348740	0	0	0	0	0	0		758.569
0	PC(16:0/18:2)+HCOO	PC(34:2)+HCOO	PC	(16:0/18:2)	(16:0)	(18:2)			802.56	C43 H81 O10 N1 P1	0	0	0	0	0	0	0	0	0	0	0	0	0	0	0	0	0	0	0	2.64122e+06	0	7.20363e+06	0	1.1897e+07	0	0	0	660.962	0	0	0	0	0	0	0	0
0	PC(34:2)+H	PC(34:2)+H	PC	(16:0/18:2)	(16:0)	(18:2)			758.569	C42 H81 O8 N1 P1	0	3.57078e+06	0	2.53673e+06	0	0	0	0	0	0	0	0	0	0	900581	0	3.85447e+07	0	58319.7	5.62581e+07	9301.76	1.50721e+08	0	2.01474e+08	0	2.87292e+06	512667	0	0	0	684086	0	5.76866e+06	0	2.9343e+06	0
0	PC(16:0/18:2)+HCOO	PC(34:2)+HCOO	PC	(16:0/18:2)	(16:0)	(18:2)			802.56	C43 H81 O10 N1 P1	0	0	0	0	0	0	0	0	0	0	0	0	0	0	0	0	0	0	0	2.30187e+07	0	1.65622e+07	0	2.27286e+07	0	659621	0	895.672	0	0	0	0	0	0	0	0
0	PC(34:2)+H	PC(34:2)+H	PC	(16:0/18:2)	(16:0)	(18:2)			758.569	C42 H81 O8 N1 P1	0	6.57678e+06	0	3.01133e+06	0	0	0	0	0	0	0	0	0	0	30947.9	0	3.76078e+07	0	42667.9	3.93632e+08	0	1.58064e+07	433556	1.4507e+07	54079.1	1.52696e+06	0	0	0	0	0	0	1.13735e+07	0	0	7.66664e+06		758.569
0	PC(16:0/18:2)+HCOO	PC(34:2)+HCOO	PC	(16:0/18:2)	(16:0)	(18:2)			802.56	C43 H81 O10 N1 P1	0	0	0	0	0	0	0	0	0	0	0	0	0	0	0	0	0	0	0	0	0	1.30815e+06	0	653203	0	1.23596e+06	0	0	0	0	0	0	0	0	0	3.91741e+06
0	PC(16:0/18:2)+HCOO	PC(34:2)+HCOO	PC	(16:0/18:2)	(16:0)	(18:2)			802.56	C43 H81 O10 N1 P1	0	0	0	0	0	0	0	0	0	0	0	0	0	0	0	0	0	0	0	177808	0	0	0	0	0	0	0	0	0	0	0	0	0	6.84987e+06	0	0
0	PC(34:2)+H	PC(34:2)+H	PC	(16:0/18:2)	(16:0)	(18:2)			758.569	C42 H81 O8 N1 P1	0	0	0	0	0	0	0	0	0	0	0	0	0	0	0	0	0	0	0	0	0	5741.42	0	429042	0	0	0	0	2.96833e+07	0	0	0	242769	1.90076e+08	29219.9	7.95676e+06
0	PC(34:2)+H	PC(34:2)+H	PC	(34:2)	(34:2)				758.569	C42 H81 O8 N1 P1	0	0	0	0	0	0	0	0	0	0	0	6.78136e+06	0	3.0697e+06	7.19248e+06	0	0	0	0	0	0	0	0	0	0	0	0	0	0	0	208896	0	0	96612.4	0	0
0	PC(34:2e)+H	PC(34:2e)+H	PC	(34:2e)	(34:2e)				744.59	C42 H83 O7 N1 P1	1.81099e+06	67951	1.03134e+08	142705	1.116e+08	0	1.02977e+08	0	509811	0	8.51431e+07	0	0	0	0	3671.47	61865.4	1.57706e+08	0	99370.6	0	0	0	0	0	223271	0	0	0	1.30895e+07	0	121104	0	0	0	0	744.59	744.59	744.589
0	PC(34:2e)+H	PC(34:2e)+H	PC	(34:2e)	(34:2e)				744.59	C42 H83 O7 N1 P1	0	0	0	0	0	0	0	0	0	0	0	4181.84	0	0	0	0	844.778	0	0	0	0	764661	0	5961.24	0	0	0	0	0	4.52036e+07	0	1.51154e+07	0	0	0	0
0	PC(34:2e)+H	PC(34:2e)+H	PC	(34:2e)	(34:2e)				744.59	C42 H83 O7 N1 P1	0	0	0	0	1.05898e+06	167569	9.13984e+06	815.858	0	0	1.60073e+06	0	0	0	0	0	0	0	0	0	0	0	0	0	0	0	0	0	0	2.96001e+08	0	0	0	0	0	94905.4
0	PC(34:2e)+H	PC(34:2e)+H	PC	(34:2e)	(34:2e)				744.59	C42 H83 O7 N1 P1	0	0	0	0	0	469.718	0	0	0	0	0	0	0	0	0	0	2242.8	0	0	1.5721e+06	0	8841.6	0	13312.8	0	1.48077e+08	0	12693.9	776.121	0	0	0	0	0	0	0
0	PC(34:3)+H	PC(34:3)+H	PC	(34:3)	(34:3)				756.554	C42 H79 O8 N1 P1	147119	0	2.32427e+06	0	4.36007e+06	0	7.18779e+06	0	105216	0	6.07938e+06	0	100509	0	0	133284	0	920496	0	0	0	0	0	0	0	0	0	0	0	46803.9	0	629093	0	200056	0	70414.5	756.554		756.553
0	PC(16:0/18:3)+H	PC(34:3)+H	PC	(16:0/18:3)	(16:0)	(18:3)			756.554	C42 H79 O8 N1 P1	2.82949e+07	0	8.21643e+06	0	1.02435e+06	0	8.43264e+07	0	1.31245e+07	0	8.684e+07	0	8.78769e+06	0	0	5.18993e+06	0	8.53819e+07	0	0	0	0	0	0	0	0	0	0	0	723181	0	0	0	0	0	0	756.551		756.549
0	PC(34:3)+H	PC(34:3)+H	PC	(34:3)	(34:3)				756.554	C42 H79 O8 N1 P1	0	0	319665	0	3345.56	0	0	0	0	0	0	0	0	0	0	0	0	229679	0	0	0	0	0	0	0	0	0	1967.47	0	0	0	1.47151e+08	0	0	0	0			756.554
0	PC(16:0/18:3)+H	PC(34:3)+H	PC	(16:0/18:3)	(16:0)	(18:3)			756.554	C42 H79 O8 N1 P1	0	0	0	0	34396.5	0	11116.7	0	0	0	0	0	0	0	0	0	0	4051.8	0	0	0	63891.5	0	2718.61	0	0	0	0	0	1.17035e+07	0	0	0	0	0	0
1	PC(34:3)+H	PC(34:3)+H	PC	(34:3)	(34:3)				756.554	C42 H79 O8 N1 P1	0	0	0	0	0	0	0	46566.6	0	0	0	0	0	0	0	0	122804	0	0	3.25798e+06	0	3.67746e+06	0	5.50711e+06	0	4.24764e+06	0	6.15788e+07	0	390625	0	362218	0	0	0	108547
0	PC(34:3)+H	PC(34:3)+H	PC	(34:3)	(34:3)				756.554	C42 H79 O8 N1 P1	0	0	0	0	0	0	0	54153.8	0	0	0	0	0	0	0	0	144474	0	0	620134	0	1.66554e+06	0	6.83116e+06	0	282292	0	6.20479e+07	0	0	0	0	0	0	0	0
0	PC(34:3)+H	PC(34:3)+H	PC	(34:3)	(34:3)				756.554	C42 H79 O8 N1 P1	0	0	0	0	0	0	0	0	0	0	0	0	0	0	0	0	0	0	0	6.79919e+06	0	966088	0	291739	0	252060	0	119082	0	0	0	0	0	0	0	100527
0	PC(16:0/18:3)+H	PC(34:3)+H	PC	(16:0/18:3)	(16:0)	(18:3)			756.554	C42 H79 O8 N1 P1	0	0	0	0	0	0	0	0	0	0	0	18981.2	0	0	0	0	1250.48	0	0	0	0	5352.24	0	285542	0	0	0	0	0	0	0	0	0	105886	0	4.486e+07
0	PC(16:0/18:3)+H	PC(34:3)+H	PC	(16:0/18:3)	(16:0)	(18:3)			756.554	C42 H79 O8 N1 P1	0	0	0	0	0	0	0	0	0	0	0	0	0	0	0	0	0	0	0	0	0	0	0	0	0	0	0	0	0	0	0	0	0	2.77797e+07	0	0
0	PC(34:4)+H	PC(34:4)+H	PC	(34:4)	(34:4)				754.538	C42 H77 O8 N1 P1	339407	0	1.28804e+07	0	2.28986e+07	0	1.32618e+07	30016.2	326785	344955	2.88162e+07	0	0	0	3812.56	127039	0	1.48435e+08	6937.96	0	42652.6	0	39375.1	0	19078.3	0	14408.8	0	1.35064e+06	1.93279e+06	7.64733e+06	0	0	4.88217e+06	17819.6	0	754.538		754.535
0	PC(34:4)+H	PC(34:4)+H	PC	(34:4)	(34:4)				754.538	C42 H77 O8 N1 P1	2191.48	0	8.8216e+06	0	20320.2	0	8.6535e+06	0	0	0	34438.9	0	0	0	12169.9	0	118785	83075.5	0	0	0	0	0	0	0	0	0	0	0	0	0	8.42449e+06	8107.75	0	0	0	754.538		754.538
0	PC(34:4)+H	PC(34:4)+H	PC	(34:4)	(34:4)				754.538	C42 H77 O8 N1 P1	0	409668	58304.8	0	167692	0	604872	48079.8	0	0	273124	1.29272e+06	114853	80410	0	0	0	25103.6	2.09224e+06	0	2.16583e+07	0	7.45839e+06	189499	104875	0	2.41412e+07	0	0	6.48858e+07	15346	1.14698e+06	0	0	0	0		754.538	754.538
0	PC(34:4)+H	PC(34:4)+H	PC	(34:4)	(34:4)				754.538	C42 H77 O8 N1 P1	0	0	0	0	0	0	0	0	0	0	0	0	0	0	0	0	0	0	0	1.315e+06	0	54829.7	21933.6	1.47552e+06	0	2.7572e+07	0	0	0	0	0	0	0	0	0	0
0	PC(34:4)+H	PC(34:4)+H	PC	(34:4)	(34:4)				754.538	C42 H77 O8 N1 P1	0	0	0	0	0	0	0	0	0	0	0	0	0	0	1.15873e+06	0	0	0	0	1.54138e+07	0	2.83691e+07	0	5.0317e+07	0	1.18029e+07	0	150734	0	0	4.25882e+06	0	0	381436	63491.4	0
0	PC(34:4)+H	PC(34:4)+H	PC	(34:4)	(34:4)				754.538	C42 H77 O8 N1 P1	0	0	0	0	0	0	0	0	0	0	0	0	0	0	0	0	0	0	0	0	0	0	0	0	0	0	0	0	0	0	0	0	0	2.71463e+06	260056	0
0	PC(34:4p)+H	PC(34:4p)+H	PC	(34:4p)	(34:4p)				738.543	C42 H77 O7 N1 P1	86388.1	0	373905	0	2.30032e+06	0	138626	0	667899	0	2.17525e+06	0	3324.2	0	123.632	4.96769e+06	0	315928	0	0	0	0	0	0	0	0	0	0	0	0	0	0	0	0	0	0			738.543
0	PC(16:0/19:0)+H	PC(35:0)+H	PC	(16:0/19:0)	(16:0)	(19:0)			776.616	C43 H87 O8 N1 P1	0	0	1.85148e+07	0	1.94699e+07	0	1.50597e+07	0	0	0	2.29551e+07	0	0	0	0	0	0	3.87475e+06	0	0	0	0	0	0	0	0	0	0	0	414975	0	0	0	0	0	0			776.616
0	PC(17:0/18:1)+HCOO	PC(35:1)+HCOO	PC	(17:0/18:1)	(17:0)	(18:1)			818.592	C44 H85 O10 N1 P1	254152	0	1.89195e+07	0	1.92353e+07	0	1.76533e+07	0	0	0	1.47283e+07	0	164128	0	0	0	0	2.40549e+07	0	0	0	0	0	0	0	0	0	0	0	0	0	0	0	0	0	0	818.592		818.593
0	PC(17:0/18:1)+H	PC(35:1)+H	PC	(17:0/18:1)	(17:0)	(18:1)			774.601	C43 H85 O8 N1 P1	135509	0	2.32322e+08	223881	2.8086e+08	36405.9	2.39668e+08	1.67143e+06	4.26151e+06	130310	2.3232e+08	1.30873e+06	1.47627e+06	1.59374e+06	0	802892	124981	3.96633e+08	0	1.14381e+06	0	2.01314e+06	0	1.54488e+06	0	0	0	0	0	1.68868e+06	0	0	0	0	0	0	774.601		774.6
0	PC(17:0/18:1)+HCOO	PC(35:1)+HCOO	PC	(17:0/18:1)	(17:0)	(18:1)			818.592	C44 H85 O10 N1 P1	0	0	1.82212e+06	0	2.12062e+06	0	3.55577e+06	0	0	0	3.10543e+06	0	0	0	0	0	0	0	0	0	0	0	0	0	0	0	0	0	0	0	0	3.21979e+06	0	0	0	0			818.592
0	PC(17:0/18:1)+H	PC(35:1)+H	PC	(17:0/18:1)	(17:0)	(18:1)			774.601	C43 H85 O8 N1 P1	493880	1.42993e+06	5.52545e+07	132478	288106	581108	4.82898e+07	0	145811	0	198045	0	0	0	0	0	188752	181253	0	0	0	0	0	0	0	0	0	0	0	4.70894e+07	0	4.6248e+07	0	379802	0	444550
1	PC(19:1/16:0)+HCOO	PC(35:1)+HCOO	PC	(19:1/16:0)	(19:1)	(16:0)			818.592	C44 H85 O10 N1 P1	0	0	0	0	0	0	0	0	0	0	1808.64	0	0	0	0	0	0	2649.73	0	0	0	0	0	0	0	0	0	0	0	2.51912e+07	0	0	0	0	0	0
1	PC(19:1/16:0)+H	PC(35:1)+H	PC	(19:1/16:0)	(19:1)	(16:0)			774.601	C43 H85 O8 N1 P1	438678	1.42993e+06	5.89731e+07	6.80729e+06	5.86155e+07	0	4.85491e+07	0	169635	0	4.47179e+07	0	0	0	0	0	5.81655e+06	1.16355e+06	0	0	0	0	0	0	0	0	0	0	0	6.81016e+08	0	1.11183e+06	0	395934	0	0	774.601		774.601
0	PC(17:0/18:1)+HCOO	PC(35:1)+HCOO	PC	(17:0/18:1)	(17:0)	(18:1)			818.592	C44 H85 O10 N1 P1	0	0	0	0	0	0	0	0	0	0	0	0	0	0	0	0	0	0	0	0	0	0	0	0	0	0	0	1.77633e+06	0	0	0	0	0	0	0	0
0	PC(17:0/18:1)+H	PC(35:1)+H	PC	(17:0/18:1)	(17:0)	(18:1)			774.601	C43 H85 O8 N1 P1	0	0	0	0	0	0	0	0	0	0	0	0	0	0	4113.27	0	0	5541.91	0	0	16449.1	0	227182	0	98392.4	534613	44376.6	2.77471e+07	6.4294e+06	786353	0	0	0	0	0	0
0	PC(17:0/18:1)+HCOO	PC(35:1)+HCOO	PC	(17:0/18:1)	(17:0)	(18:1)			818.592	C44 H85 O10 N1 P1	0	0	0	0	0	0	0	0	0	0	0	0	0	0	0	0	0	0	0	0	0	0	0	0	0	1.17691e+07	0	0	0	0	0	0	0	0	0	0
0	PC(17:0/18:1)+H	PC(35:1)+H	PC	(17:0/18:1)	(17:0)	(18:1)			774.601	C43 H85 O8 N1 P1	0	0	0	0	0	0	0	0	0	0	0	0	0	0	268784	0	0	0	0	0	0	800146	0	0	0	3.90569e+08	0	4.74393e+06	0	0	0	0	0	497.505	0	0
0	PC(17:0/18:1)+HCOO	PC(35:1)+HCOO	PC	(17:0/18:1)	(17:0)	(18:1)			818.592	C44 H85 O10 N1 P1	0	0	0	0	0	0	0	0	0	0	0	0	0	0	0	0	0	0	0	7.73093e+06	0	1.3355e+07	0	1.68725e+07	0	485516	0	0	0	0	0	0	0	0	0	0
0	PC(17:0/18:1)+H	PC(35:1)+H	PC	(17:0/18:1)	(17:0)	(18:1)			774.601	C43 H85 O8 N1 P1	0	90437.2	0	0	0	0	0	0	0	0	0	0	0	0	0	0	159895	0	192469	3.40418e+07	0	4.18122e+08	170098	5.95886e+08	23422.7	5.91175e+07	115707	0	0	0	0	0	0	0	0	0		774.601
0	PC(19:1/16:1)+H	PC(35:2)+H	PC	(19:1/16:1)	(19:1)	(16:1)			772.585	C43 H83 O8 N1 P1	0	0	1.01235e+07	0	1.60178e+07	0	3.92775e+07	0	0	0	2.48051e+07	0	0	0	0	0	0	7.19932e+06	0	9.01655e+06	0	72107.9	0	0	0	0	0	0	784618	4.44869e+07	0	1.18836e+06	0	0	0	183319			772.585
0	PC(35:4)+H	PC(35:4)+H	PC	(35:4)	(35:4)				768.554	C43 H79 O8 N1 P1	5.58357e+07	0	1.02774e+09	0	1.79302e+08	0	310338	0	1.59144e+07	0	7.81718e+07	0	178709	0	0	2.00929e+07	0	3.04963e+09	0	0	0	0	0	0	0	6620.65	0	0	0	6.37676e+07	131397	2.4827e+06	0	0	0	0	768.554
0	PC(35:4)+H	PC(35:4)+H	PC	(35:4)	(35:4)				768.554	C43 H79 O8 N1 P1	0	0	0	0	0	0	0	0	0	0	0	0	0	0	0	0	0	0	0	365358	0	880340	0	6.18517e+06	0	2.26886e+09	0	3.94099e+06	0	5114.36	0	98923.3	0	1082.22	0	0
0	PC(35:4)+H	PC(35:4)+H	PC	(35:4)	(35:4)				768.554	C43 H79 O8 N1 P1	0	0	0	0	0	0	0	0	0	0	0	0	0	0	0	0	0	195757	0	4.86902e+07	0	1.8387e+09	0	2.83057e+09	0	1.90024e+07	0	0	0	0	0	0	0	1243.88	0	1844.08
0	PC(35:5)+H	PC(35:5)+H	PC	(35:5)	(35:5)				766.538	C43 H77 O8 N1 P1	0	0	2589.41	0	64422.7	0	148098	0	98100.8	0	67158.5	0	0	0	93384.6	0	0	583107	0	0	0	1.01761e+07	0	2.14784e+07	0	6.38187e+07	0	1.78931e+06	572784	10757.4	429129	232400	0	0	0	852403			766.538
0	PC(20:0/16:0)+HCOO	PC(36:0)+HCOO	PC	(20:0/16:0)	(20:0)	(16:0)			834.623	C45 H89 O10 N1 P1	2.75647e+06	0	2.04918e+07	0	1.59444e+07	0	2.03958e+07	0	607991	0	1.96807e+07	0	292463	0	0	96866.3	0	2.59714e+07	0	0	0	0	0	0	0	0	0	0	0	3.48889e+06	0	1.9084e+07	0	0	0	0	834.623		834.624
0	PC(36:0)+H	PC(36:0)+H	PC	(20:0/16:0)	(20:0)	(16:0)			790.632	C44 H89 O8 N1 P1	2.96834e+06	0	1.32287e+08	0	252176	0	1.05531e+08	0	1.77122e+06	0	1.07574e+08	0	697550	0	0	747646	0	2.07149e+08	0	0	0	0	0	0	0	0	0	0	0	7.51339e+07	0	1.65288e+08	0	0	0	0	790.632		790.631
0	PC(20:0/16:0)+HCOO	PC(36:0)+HCOO	PC	(20:0/16:0)	(20:0)	(16:0)			834.623	C45 H89 O10 N1 P1	0	0	0	0	0	0	0	0	0	0	0	0	0	0	0	0	0	0	0	0	0	0	0	0	0	0	0	0	0	2.38164e+07	0	1.07144e+07	0	0	0	0
0	PC(36:0)+H	PC(36:0)+H	PC	(20:0/16:0)	(20:0)	(16:0)			790.632	C44 H89 O8 N1 P1	0	0	558708	0	0	0	0	0	0	0	272945	53582.7	0	0	0	0	0	0	0	0	0	0	0	0	0	0	0	156576	0	3.59542e+08	0	4.67105e+07	0	0	208274	0			790.632
0	PC(18:0/18:0)+HCOO	PC(36:0)+HCOO	PC	(18:0/18:0)	(18:0)	(18:0)			834.623	C45 H89 O10 N1 P1	0	0	0	0	0	0	0	0	0	0	0	0	0	0	0	0	0	0	0	0	0	0	0	0	0	4.71936e+06	0	2.62988e+06	0	0	0	0	0	0	0	0
0	PC(18:0/18:0)+HCOO	PC(36:0)+HCOO	PC	(18:0/18:0)	(18:0)	(18:0)			834.623	C45 H89 O10 N1 P1	0	0	0	0	0	0	0	0	0	0	0	0	0	0	0	0	0	0	88619.5	8.87048e+06	0	1.2186e+07	0	1.67374e+07	0	1.23636e+07	0	0	0	0	0	0	0	0	0	4.91809e+06
0	PC(36:0)+H	PC(36:0)+H	PC	(18:0/18:0)	(18:0)	(18:0)			790.632	C44 H89 O8 N1 P1	0	0	63413.4	0	0	0	68126.8	0	0	0	62557	0	0	0	0	0	0	0	0	7.57721e+07	0	1.25646e+08	0	2.41115e+08	0	0	0	0	0	302791	0	151250	0	0	0	6.25429e+07			790.632
0	PC(16:0e/20:0)+H	PC(36:0e)+H	PC	(16:0e/20:0)	(16:0e)	(20:0)			776.653	C44 H91 O7 N1 P1	0	0	0	0	0	0	0	0	0	0	0	0	0	0	0	0	0	0	0	0	0	0	0	0	0	0	0	0	0	2.60414e+07	0	0	0	0	0	0
1	PC(20:0p/16:0)+H	PC(36:0p)+H	PC	(20:0p/16:0)	(20:0p)	(16:0)			774.637	C44 H89 O7 N1 P1	0	0	0	0	0	0	0	0	0	0	0	0	0	0	0	0	0	0	0	5.34491e+06	0	9.40353e+07	0	1.5097e+08	0	6508.98	0	0	0	0	0	0	0	0	0	0
0	PC(18:0/18:1)+HCOO	PC(36:1)+HCOO	PC	(18:0/18:1)	(18:0)	(18:1)			832.607	C45 H87 O10 N1 P1	0	3.52657e+06	0	3.2325e+06	0	0	0	4416.26	0	0	0	0	26937.2	73743.8	1.60065e+06	0	2.95238e+06	0	2.68087e+07	0	6.41478e+06	0	1.56779e+06	0	9.83218e+06	0	1.43334e+07	0	6.46259e+06	0	1.34292e+07	0	1.03219e+06	19228.2	5.23614e+06	70059		832.608
0	PC(36:1)+H	PC(36:1)+H	PC	(18:0/18:1)	(18:0)	(18:1)			788.616	C44 H87 O8 N1 P1	31940.8	2.87741e+07	0	1.99822e+08	178895	6083.69	988619	460029	0	0	187950	0	103784	2.3181e+06	5.12605e+07	5075.15	1.95702e+07	26898.5	1.86059e+08	577065	9.18684e+06	991654	1.47127e+07	71293.7	4.06482e+07	0	2.63493e+08	15193.1	1.87663e+08	0	2.48084e+08	0	3.00143e+07	0	3.06933e+07	3.35182e+06		788.616
1	PC(18:0/18:1)+HCOO	PC(36:1)+HCOO	PC	(18:0/18:1)	(18:0)	(18:1)			832.607	C45 H87 O10 N1 P1	0	2.04464e+07	0	2.9111e+06	0	0	0	4416.26	0	0	0	0	26937.2	62791.2	1.45318e+07	0	7.61842e+06	0	31882.9	0	6.41478e+06	0	1.56779e+06	0	9.83218e+06	0	803207	0	1.45656e+06	0	3.58855e+06	0	1.03219e+06	23342.3	5.23614e+06	57400.9
1	PC(36:1)+H	PC(36:1)+H	PC	(18:0/18:1)	(18:0)	(18:1)			788.616	C44 H87 O8 N1 P1	36890.9	4.73088e+08	0	1.99822e+08	178895	6083.69	988619	403942	0	0	187950	0	103784	4.04828e+06	2.9846e+08	5075.15	7.039e+07	26898.5	1.86059e+08	631965	9.18684e+06	1.08583e+06	29831.3	71293.7	4.06482e+07	0	2.6329e+08	15193.1	1.70282e+08	0	7.87137e+06	0	2.70153e+07	0	2.93148e+07	3.36347e+06	788.616
1	PC(36:1)+H	PC(36:1)+H	PC	(36:1)	(36:1)				788.616	C44 H87 O8 N1 P1	31940.8	4.73088e+08	0	1.99822e+08	178895	6083.69	988619	403942	0	0	187950	0	103784	4.04828e+06	2.9846e+08	5075.15	7.039e+07	26898.5	1.86059e+08	631965	9.18684e+06	1.08583e+06	29831.3	71293.7	4.06482e+07	0	8.31047e+07	15193.1	1.87663e+08	0	2.4723e+08	0	2.70153e+07	0	599750	3.36347e+06
0	PC(18:0/18:1)+HCOO	PC(36:1)+HCOO	PC	(18:0/18:1)	(18:0)	(18:1)			832.607	C45 H87 O10 N1 P1	0	0	0	0	0	0	0	0	0	0	0	0	0	0	0	0	0	0	5.22228e+06	0	1.82541e+06	0	56338	0	2412.73	0	0	0	0	0	0	0	1.0029e+06	0	1.39005e+06	0
0	PC(36:1)+H	PC(36:1)+H	PC	(18:0/18:1)	(18:0)	(18:1)			788.616	C44 H87 O8 N1 P1	0	0	0	0	0	0	169689	0	0	0	0	0	0	0	0	0	0	0	9.96027e+07	0	439785	0	3.12759e+06	0	1.44291e+06	0	789976	0	160686	0	140262	0	7.92976e+06	0	1.87193e+07	0
0	PC(36:1)+H	PC(36:1)+H	PC	(36:1)	(36:1)				788.616	C44 H87 O8 N1 P1	186315	0	0	0	574025	0	1.15925e+06	0	84357.1	0	842948	0	112279	0	0	1.6155e+06	0	125422	233486	0	850971	0	0	0	754690	0	179256	0	0	0	0	0	7.01329e+07	0	3.23949e+06	0	788.616
0	PC(16:0/20:1)+HCOO	PC(36:1)+HCOO	PC	(16:0/20:1)	(16:0)	(20:1)			832.607	C45 H87 O10 N1 P1	4.72101e+07	0	6.92809e+08	0	6.42863e+08	0	6.94774e+08	0	2.19476e+07	0	7.11184e+08	0	1.02212e+07	0	0	7.828e+06	43516.6	1.10199e+09	0	0	0	0	0	0	0	0	0	0	0	1.12797e+07	0	347458	0	0	0	0	832.608		832.608
0	PC(36:1)+H	PC(36:1)+H	PC	(16:0/20:1)	(16:0)	(20:1)			788.616	C44 H87 O8 N1 P1	3.13074e+08	87759.1	8.72951e+09	0	8.78795e+09	0	8.49623e+09	0	1.41203e+08	0	7.60393e+09	295811	6.43901e+07	120029	0	6.91377e+07	66890.4	1.28616e+10	0	2.18602e+06	0	2.71513e+06	0	2.58325e+06	0	0	0	0	0	1.31609e+08	958701	1.51632e+07	0	0	0	0	788.616	788.616	788.615
0	PC(18:0/18:1)+HCOO	PC(36:1)+HCOO	PC	(18:0/18:1)	(18:0)	(18:1)			832.607	C45 H87 O10 N1 P1	0	0	69569.9	0	0	0	0	0	0	0	156854	0	0	0	0	0	0	489168	0	34163.1	0	0	0	0	0	0	0	0	0	890593	0	2.00914e+08	0	0	0	0			832.607
0	PC(36:1)+H	PC(36:1)+H	PC	(18:0/18:1)	(18:0)	(18:1)			788.616	C44 H87 O8 N1 P1	0	0	2.60942e+06	0	1.39121e+06	50211.4	1.95678e+06	74983.9	0	0	1.31434e+06	0	0	0	0	0	0	1.54568e+07	0	0	0	0	0	0	0	0	0	0	0	7.27505e+06	0	2.43961e+09	0	0	0	185903			788.616
0	PC(16:0/20:1)+HCOO	PC(36:1)+HCOO	PC	(16:0/20:1)	(16:0)	(20:1)			832.607	C45 H87 O10 N1 P1	0	0	1172.16	0	1804.19	0	828.82	0	0	0	818.573	0	0	0	0	0	0	36268.9	0	0	0	0	0	0	0	0	0	0	0	1.12756e+09	0	2516.55	0	0	0	0			832.607
0	PC(36:1)+H	PC(36:1)+H	PC	(16:0/20:1)	(16:0)	(20:1)			788.616	C44 H87 O8 N1 P1	0	0	1.17842e+06	0	335837	0	13355.4	0	0	0	7420.4	0	0	0	0	0	0	2.77948e+06	0	112785	0	0	706514	0	0	0	0	0	0	1.83705e+10	0	4.91253e+06	0	323671	0	0			788.616
0	PC(16:0/20:1)+HCOO	PC(36:1)+HCOO	PC	(16:0/20:1)	(16:0)	(20:1)			832.607	C45 H87 O10 N1 P1	0	0	0	0	0	0	0	0	0	0	0	0	0	0	0	0	0	0	0	0	0	0	0	0	0	8.76822e+06	0	6.13696e+07	0	0	0	0	0	0	0	0
0	PC(36:1)+H	PC(36:1)+H	PC	(16:0/20:1)	(16:0)	(20:1)			788.616	C44 H87 O8 N1 P1	0	0	0	0	0	0	20220.7	0	0	0	0	0	0	0	0	0	0	478593	0	174349	0	0	0	0	0	8.05078e+07	0	9.62491e+08	0	2.20456e+06	0	0	0	0	0	0
0	PC(18:0/18:1)+HCOO	PC(36:1)+HCOO	PC	(18:0/18:1)	(18:0)	(18:1)			832.607	C45 H87 O10 N1 P1	0	0	0	0	0	0	0	0	0	0	0	0	0	0	0	0	0	0	0	253543	0	8.86577e+06	0	8.69819e+06	0	5.46318e+08	0	0	0	50649.8	0	0	0	0	0	0
0	PC(36:1)+H	PC(36:1)+H	PC	(18:0/18:1)	(18:0)	(18:1)			788.616	C44 H87 O8 N1 P1	0	0	0	0	0	0	8381.49	0	0	0	0	0	0	0	108204	0	0	0	0	3.44929e+06	60534.3	7.96698e+07	3099.68	1.28762e+08	0	1.12673e+10	0	1853.72	0	14576.1	75467.3	0	0	0	0	2927.55
0	PC(16:0/20:1)+HCOO	PC(36:1)+HCOO	PC	(16:0/20:1)	(16:0)	(20:1)			832.607	C45 H87 O10 N1 P1	0	0	0	0	0	0	0	0	0	0	0	0	0	0	0	0	0	0	0	2.92366e+08	0	5.18129e+08	0	7.28507e+08	0	1.47819e+06	0	0	0	0	0	0	0	0	0	1.03381e+06
0	PC(36:1)+H	PC(36:1)+H	PC	(16:0/20:1)	(16:0)	(20:1)			788.616	C44 H87 O8 N1 P1	0	157704	381692	0	207832	0	0	0	0	0	132083	0	0	0	177341	0	1.656e+06	527251	0	6.45211e+09	0	1.18044e+10	0	1.53158e+10	0	1.62278e+07	0	0	0	581653	0	0	0	0	0	1.88978e+07		788.616
0	PC(18:0/18:1)+HCOO	PC(36:1)+HCOO	PC	(18:0/18:1)	(18:0)	(18:1)			832.607	C45 H87 O10 N1 P1	0	0	0	0	0	0	0	0	0	0	0	0	0	0	0	0	0	62577.6	0	1.46412e+06	0	927582	0	696903	0	134385	0	0	0	96976	0	0	0	275910	0	5.71993e+07
0	PC(36:1)+H	PC(36:1)+H	PC	(18:0/18:1)	(18:0)	(18:1)			788.616	C44 H87 O8 N1 P1	0	0	5.19603e+06	0	7.95831e+06	0	4.40145e+06	0	0	0	4.37152e+06	0	0	58241	0	0	0	8.23084e+06	54154.7	1.76981e+08	131387	1.23427e+07	228667	1.4004e+07	74696	3.94997e+06	1.95218e+06	129711	0	585148	0	79542.6	0	5.61698e+07	0	8.49135e+08			788.616
0	PC(36:1)+H	PC(36:1)+H	PC	(36:1)	(36:1)				788.616	C44 H87 O8 N1 P1	0	0	61587.9	0	422926	0	327309	0	0	0	341319	0	0	58028.9	0	0	0	329616	312560	2.53945e+06	65511.6	9.34182e+06	122887	1.60176e+06	10438.5	761203	1.95125e+06	274848	0	1.88059e+06	0	90379.1	0	4.10386e+08	0	5.85031e+07			788.616
0	PC(36:1e)+H	PC(36:1e)+H	PC	(36:1e)	(36:1e)				774.637	C44 H89 O7 N1 P1	7612.28	0	3.67772e+07	0	4.02794e+07	0	481712	0	0	0	3.17401e+07	0	0	0	0	0	0	5.79882e+07	0	0	0	0	0	0	0	0	0	0	0	1.61119e+06	0	0	0	0	0	0	774.637		774.637
0	PC(36:1e)+HCOO	PC(36:1e)+HCOO	PC	(36:1e)	(36:1e)				818.628	C45 H89 O9 N1 P1	0	0	0	0	0	0	0	0	0	0	0	0	0	0	0	0	0	214236	0	0	0	0	0	0	0	0	0	0	0	0	0	1.18307e+06	0	0	0	0
0	PC(18:0e/18:1)+HCOO	PC(36:1e)+HCOO	PC	(18:0e/18:1)	(18:0e)	(18:1)			818.628	C45 H89 O9 N1 P1	0	0	0	0	0	0	0	0	0	0	0	0	0	0	0	0	0	0	24200.8	0	0	2.066e+06	0	6.13904e+06	0	5.14923e+06	0	0	0	0	0	0	0	0	0	0
0	PC(36:1e)+H	PC(36:1e)+H	PC	(18:0e/18:1)	(18:0e)	(18:1)			774.637	C44 H89 O7 N1 P1	0	0	0	0	0	0	0	0	0	0	0	0	0	0	0	0	0	0	0	0	0	2.91514e+07	0	4.94445e+07	0	3.55804e+06	0	0	0	0	0	0	0	0	0	0
1	PC(36:2)+H	PC(36:2)+H	PC	(36:2)	(36:2)				786.601	C44 H85 O8 N1 P1	0	2.56025e+06	0	214391	89398.8	0	0	0	0	0	0	0	0	121018	2.30497e+07	0	6.08513e+06	0	1.65793e+08	0	9.38569e+06	0	2.9687e+06	0	9.4088e+06	0	6.22748e+07	0	4.33888e+07	0	5.27741e+07	0	1.63577e+07	0	1.93535e+06	107935		786.601
0	PC(18:1/18:1)+HCOO	PC(36:2)+HCOO	PC	(18:1/18:1)	(18:1)	(18:1)			830.592	C45 H85 O10 N1 P1	0	0	0	0	0	0	0	0	0	0	0	0	0	0	0	0	0	0	0	0	0	0	11624.4	0	0	0	285420	0	321779	0	2.03051e+06	0	0	0	0	25082.8
0	PC(36:2)+H	PC(36:2)+H	PC	(18:1/18:1)	(18:1)	(18:1)			786.601	C44 H85 O8 N1 P1	0	49971.8	0	0	0	0	0	0	0	0	0	0	0	0	0	0	0	0	0	0	0	0	0	0	189594	0	815748	0	4.29371e+07	0	1.56881e+07	0	171233	0	0	0
0	PC(18:1/18:1)+HCOO	PC(36:2)+HCOO	PC	(18:1/18:1)	(18:1)	(18:1)			830.592	C45 H85 O10 N1 P1	0	0	0	0	0	0	0	0	0	0	0	0	0	0	0	0	0	0	607029	0	101697	0	0	0	419972	0	0	0	0	0	0	0	0	0	997366	0
0	PC(36:2)+H	PC(36:2)+H	PC	(18:1/18:1)	(18:1)	(18:1)			786.601	C44 H85 O8 N1 P1	0	2.50544e+06	0	214391	109253	0	0	0	0	0	0	0	0	121018	2.30497e+07	0	6.08513e+06	0	1.61383e+08	0	3.53314e+06	0	3.32965e+06	0	1.73075e+06	0	6.22748e+07	0	4.33888e+07	0	5.27741e+07	0	1.54577e+07	0	1.18906e+06	89641.7
0	PC(18:1/18:1)+HCOO	PC(36:2)+HCOO	PC	(18:1/18:1)	(18:1)	(18:1)			830.592	C45 H85 O10 N1 P1	1.17536e+07	0	8.12557e+07	0	9.61685e+07	0	1.02328e+08	0	146846	0	2.60092e+07	0	1.2928e+06	0	0	903928	0	1.4016e+08	0	0	0	0	0	0	0	0	0	0	0	36998.4	0	157216	0	0	0	0	830.592		830.593
0	PC(36:2)+H	PC(36:2)+H	PC	(18:1/18:1)	(18:1)	(18:1)			786.601	C44 H85 O8 N1 P1	8.69323e+07	0	3.5717e+08	0	3.10135e+08	0	3.40738e+08	0	4.06493e+07	0	9.3637e+08	0	2.23261e+07	0	0	2.33653e+07	0	4.91442e+08	0	330548	0	337023	0	0	0	107347	0	143194	0	986377	0	5.36173e+06	0	0	0	0	786.6		786.6
0	PC(18:1/18:1)+HCOO	PC(36:2)+HCOO	PC	(18:1/18:1)	(18:1)	(18:1)			830.592	C45 H85 O10 N1 P1	0	0	203118	0	0	0	0	0	0	0	0	0	0	0	0	0	0	1.21298e+06	0	0	0	0	0	0	0	0	0	0	0	1.15338e+06	0	2.92118e+07	0	0	0	0			830.592
0	PC(36:2)+H	PC(36:2)+H	PC	(18:1/18:1)	(18:1)	(18:1)			786.601	C44 H85 O8 N1 P1	0	0	603571	0	1.74991e+06	0	1.96595e+06	0	0	0	1.65622e+06	0	0	0	0	0	0	1.26832e+06	0	0	0	240804	0	157734	0	0	0	0	0	3.55559e+07	86086.5	4.07008e+08	0	0	0	224058			786.601
0	PC(18:1/18:1)+HCOO	PC(36:2)+HCOO	PC	(18:1/18:1)	(18:1)	(18:1)			830.592	C45 H85 O10 N1 P1	0	0	218743	0	483460	0	288502	0	0	0	181413	0	0	0	0	0	0	327060	0	0	0	0	0	0	0	0	0	0	0	1.16474e+08	0	677260	0	0	0	0			830.592
0	PC(36:2)+H	PC(36:2)+H	PC	(18:1/18:1)	(18:1)	(18:1)			786.601	C44 H85 O8 N1 P1	0	0	4.31539e+06	0	1.80211e+06	0	0	0	0	0	270278	463835	0	0	0	0	0	4.02848e+07	0	1.17638e+07	0	0	0	0	0	0	0	0	0	6.28505e+08	0	2.62773e+06	0	0	0	3.04997e+06			786.601
0	PC(18:1/18:1)+HCOO	PC(36:2)+HCOO	PC	(18:1/18:1)	(18:1)	(18:1)			830.592	C45 H85 O10 N1 P1	0	0	0	0	0	0	133434	0	0	0	0	0	0	0	0	0	0	0	0	0	0	0	0	0	0	114051	0	9.91587e+06	0	479611	0	0	0	0	0	0
0	PC(36:2)+H	PC(36:2)+H	PC	(18:1/18:1)	(18:1)	(18:1)			786.601	C44 H85 O8 N1 P1	0	0	0	0	0	0	0	0	0	0	0	1.10877e+06	0	197198	0	0	1.41547e+06	67626.5	0	103546	0	0	0	0	0	1.67966e+07	0	5.65368e+07	0	463754	0	0	0	0	0	0
0	PC(18:1/18:1)+H	PC(36:2)+H	PC	(18:1/18:1)	(18:1)	(18:1)			786.601	C44 H85 O8 N1 P1	0	0	0	0	0	0	0	0	0	443936	0	0	0	0	0	0	244134	0	0	682900	0	1.34371e+07	0	1.97793e+07	0	1.4997e+09	0	1.13224e+06	0	653688	0	0	0	0	0	158312
0	PC(18:1/18:1)+HCOO	PC(36:2)+HCOO	PC	(18:1/18:1)	(18:1)	(18:1)			830.592	C45 H85 O10 N1 P1	0	0	0	0	0	0	127906	0	0	0	0	0	0	0	0	0	0	0	0	39728.2	0	719107	0	1.03413e+06	0	8.13052e+07	0	0	0	0	0	0	0	0	0	0
0	PC(18:1/18:1)+H	PC(36:2)+H	PC	(18:1/18:1)	(18:1)	(18:1)			786.601	C44 H85 O8 N1 P1	0	0	0	0	0	305002	0	1.03341e+06	0	28550.9	0	0	0	0	0	0	0	0	0	4.88991e+06	0	1.48947e+09	0	1.11056e+09	0	1.95795e+07	0	0	0	0	0	0	0	0	0	350001
0	PC(18:1/18:1)+HCOO	PC(36:2)+HCOO	PC	(18:1/18:1)	(18:1)	(18:1)			830.592	C45 H85 O10 N1 P1	0	0	0	0	0	0	0	0	0	0	0	0	0	0	0	0	0	0	0	5.47947e+07	0	7.42551e+07	0	9.43748e+07	0	335834	0	0	0	0	0	0	0	0	0	0
0	PC(18:1/18:1)+HCOO	PC(36:2)+HCOO	PC	(18:1/18:1)	(18:1)	(18:1)			830.592	C45 H85 O10 N1 P1	0	0	0	0	0	0	0	0	0	0	0	0	0	0	0	0	0	0	0	5.64342e+06	0	939403	0	762893	0	1988.68	0	0	0	0	0	0	0	121305	0	1.14411e+07
0	PC(36:2)+H	PC(36:2)+H	PC	(18:1/18:1)	(18:1)	(18:1)			786.601	C44 H85 O8 N1 P1	0	926908	0	2.00255e+06	0	43717.6	0	0	0	0	0	0	0	132842	476176	0	369033	0	0	2.50039e+08	0	8.64136e+06	0	3.35694e+06	0	730224	0	0	0	0	55830.2	0	0	1.73006e+06	0	2.47829e+08		786.601
0	PC(18:1/18:1)+HCOO	PC(36:2)+HCOO	PC	(18:1/18:1)	(18:1)	(18:1)			830.592	C45 H85 O10 N1 P1	0	0	0	0	0	0	0	0	0	0	0	0	0	0	0	0	0	0	0	0	0	61376.1	0	1628.03	0	23004.6	0	0	0	78111.2	0	0	0	3.37678e+06	0	0
0	PC(36:2)+H	PC(36:2)+H	PC	(18:1/18:1)	(18:1)	(18:1)			786.601	C44 H85 O8 N1 P1	0	0	71557.7	0	63527.6	0	71131.7	0	0	0	44020.5	0	0	0	0	0	0	281068	0	0	0	6081.55	0	0	0	0	0	0	0	0	0	0	0	8.13432e+08	0	0			786.601
0	PC(36:2e)+H	PC(36:2e)+H	PC	(36:2e)	(36:2e)				772.621	C44 H87 O7 N1 P1	459960	0	2.45782e+07	0	2.47389e+07	0	2.61132e+07	0	81585	0	2.30464e+07	0	0	0	0	122528	0	6.03324e+07	0	0	0	0	0	0	0	5538.06	0	0	0	13627.5	0	2.38598e+06	0	1.53741e+06	0	0			772.621
0	PC(36:2e)+H	PC(36:2e)+H	PC	(36:2e)	(36:2e)				772.621	C44 H87 O7 N1 P1	0	0	0	0	0	0	0	0	0	0	0	2579.45	0	0	0	0	0	3.15408e+06	0	1.53488e+06	0	0	0	0	0	0	0	0	0	1.09314e+08	0	0	0	0	0	0
0	PC(36:2p)+H	PC(36:2p)+H	PC	(36:2p)	(36:2p)				770.606	C44 H85 O7 N1 P1	0	0	2.41212e+07	0	2.49671e+07	0	2.30546e+07	0	0	0	1.95513e+07	0	0	0	0	0	0	638060	0	0	0	0	0	0	0	0	0	886638	0	0	0	2434.98	0	0	0	0			770.604
0	PC(36:2p)+H	PC(36:2p)+H	PC	(36:2p)	(36:2p)				770.606	C44 H85 O7 N1 P1	0	0	0	0	0	0	22418.2	0	0	0	2.22704e+06	0	0	0	0	0	0	1.47133e+06	0	0	0	0	0	0	0	0	0	0	0	6.71956e+07	0	315148	0	0	0	0
0	PC(18:1/18:2)+HCOO	PC(36:3)+HCOO	PC	(18:1/18:2)	(18:1)	(18:2)			828.576	C45 H83 O10 N1 P1	450946	0	2.62322e+07	0	2.1318e+07	0	7.93851e+06	0	191606	0	7.68481e+06	0	254788	0	0	114103	0	3.75764e+07	0	0	0	0	0	0	0	0	0	0	0	0	0	0	0	0	0	0	828.576		828.576
0	PC(36:3)+H	PC(36:3)+H	PC	(18:1/18:2)	(18:1)	(18:2)			784.585	C44 H83 O8 N1 P1	2.20993e+07	0	2.93802e+08	0	2.96241e+08	0	2.56783e+08	0	7.68469e+06	0	3.38423e+08	0	2.71244e+06	0	0	4.09731e+06	0	4.47705e+08	0	0	0	215473	0	0	0	0	0	0	0	167381	0	144800	0	79579	0	0	784.584		784.584
0	PC(16:0/20:3)+HCOO	PC(36:3)+HCOO	PC	(16:0/20:3)	(16:0)	(20:3)			828.576	C45 H83 O10 N1 P1	3574.57	0	1.29707e+07	0	2.15244e+06	0	3412.51	16870.6	3899.98	0	2.87921e+06	0	0	0	0	2580.4	0	3.03702e+07	0	0	0	0	0	0	0	0	0	0	0	0	0	7.74377e+06	0	0	0	0	828.576
0	PC(36:3)+H	PC(36:3)+H	PC	(16:0/20:3)	(16:0)	(20:3)			784.585	C44 H83 O8 N1 P1	1.10131e+07	0	3.98689e+08	0	1.32862e+07	0	2.16574e+07	0	5.8095e+06	0	1.19625e+07	0	1.03676e+06	0	0	3.73499e+06	0	3.2356e+07	0	0	0	485456	0	0	0	0	0	0	0	1.087e+06	0	8.95756e+07	0	0	0	0	784.585		784.585
0	PC(18:1/18:2)+HCOO	PC(36:3)+HCOO	PC	(18:1/18:2)	(18:1)	(18:2)			828.576	C45 H83 O10 N1 P1	0	0	0	0	0	0	997.579	0	0	0	0	0	0	0	0	0	0	0	0	0	0	0	0	0	0	0	0	0	0	3.08668e+07	0	7728.48	0	0	0	0
0	PC(36:3)+H	PC(36:3)+H	PC	(18:1/18:2)	(18:1)	(18:2)			784.585	C44 H83 O8 N1 P1	1.25978e+06	0	54650.4	0	157810	0	140139	0	954161	0	1.84713e+06	81886.1	0	0	0	277451	0	2.12985e+06	0	0	0	0	0	0	0	0	0	0	0	5.18133e+08	0	7.10765e+07	0	0	0	0	784.585		784.585
0	PC(16:0/20:3)+HCOO	PC(36:3)+HCOO	PC	(16:0/20:3)	(16:0)	(20:3)			828.576	C45 H83 O10 N1 P1	0	0	0	0	0	0	0	0	0	0	0	0	0	0	0	0	0	0	0	0	0	0	0	0	0	0	0	0	0	2.41268e+07	0	0	0	0	0	0
0	PC(36:3)+H	PC(36:3)+H	PC	(16:0/20:3)	(16:0)	(20:3)			784.585	C44 H83 O8 N1 P1	0	0	0	0	0	0	0	0	147446	0	0	0	0	0	0	0	0	0	0	0	0	0	0	3147.96	0	0	0	0	0	4.95801e+08	0	7.69453e+06	0	0	0	0
0	PC(16:0/20:3)+HCOO	PC(36:3)+HCOO	PC	(16:0/20:3)	(16:0)	(20:3)			828.576	C45 H83 O10 N1 P1	0	0	0	0	0	0	0	0	0	0	0	0	0	0	0	0	0	0	0	0	0	0	0	0	0	1.52326e+07	0	503.658	0	0	0	0	0	0	0	0
0	PC(36:3)+H	PC(36:3)+H	PC	(16:0/20:3)	(16:0)	(20:3)			784.585	C44 H83 O8 N1 P1	0	0	0	0	0	0	0	0	0	0	0	0	0	0	243890	0	0	0	0	828133	0	1.53439e+06	0	4.85876e+08	0	2.7089e+08	0	204561	470316	2.42443e+07	135954	0	0	0	0	162344
0	PC(16:0/20:3)+HCOO	PC(36:3)+HCOO	PC	(16:0/20:3)	(16:0)	(20:3)			828.576	C45 H83 O10 N1 P1	0	0	0	0	0	0	0	0	0	0	0	0	0	0	0	56490	0	123431	0	1.2764e+07	0	9.40765e+06	0	1.06049e+07	0	977405	0	0	0	0	0	0	0	0	0	0
0	PC(36:3)+H	PC(36:3)+H	PC	(16:0/20:3)	(16:0)	(20:3)			784.585	C44 H83 O8 N1 P1	0	0	0	0	0	0	0	0	0	0	0	0	0	0	206434	0	0	0	0	1.61989e+08	0	1.11663e+08	0	1.95633e+08	0	3.51324e+06	0	1.572e+07	0	0	95623.9	0	0	0	0	135919
1	PC(16:0/20:3)+HCOO	PC(36:3)+HCOO	PC	(16:0/20:3)	(16:0)	(20:3)			828.576	C45 H83 O10 N1 P1	0	0	0	0	0	0	0	0	0	0	0	0	0	0	0	56289.6	0	123241	0	1.16821e+07	0	673230	0	1.1508e+06	0	0	0	0	0	0	0	0	0	0	0	783211
1	PC(36:3)+H	PC(36:3)+H	PC	(16:0/20:3)	(16:0)	(20:3)			784.585	C44 H83 O8 N1 P1	0	0	0	0	0	0	0	0	0	0	0	0	0	0	0	0	0	0	0	9.16642e+07	0	4.54052e+07	0	7.45725e+07	0	723204	0	1.00309e+06	0	0	42915.2	0	0	0	0	8.09851e+06
0	PC(16:0/20:3)+HCOO	PC(36:3)+HCOO	PC	(16:0/20:3)	(16:0)	(20:3)			828.576	C45 H83 O10 N1 P1	0	0	0	0	0	0	0	0	0	0	0	0	0	0	0	0	0	0	0	0	0	0	0	0	0	0	0	0	0	0	0	0	0	1.07827e+06	0	0
0	PC(36:3)+H	PC(36:3)+H	PC	(16:0/20:3)	(16:0)	(20:3)			784.585	C44 H83 O8 N1 P1	0	0	0	0	73948.4	0	0	0	0	0	0	219776	0	52560.6	0	0	0	0	0	2.58951e+07	0	0	0	0	0	0	0	0	0	0	0	0	0	6.74384e+07	0	1.11256e+07
0	PC(16:0/20:4)+HCOO	PC(36:4)+HCOO	PC	(16:0/20:4)	(16:0)	(20:4)			826.56	C45 H81 O10 N1 P1	0	0	0	0	0	0	0	0	0	0	0	0	0	0	0	0	0	0	0	0	0	0	0	0	0	0	2.84302e+06	0	4.54361e+06	0	1.24273e+06	0	0	0	0	0
0	PC(36:4)+H	PC(36:4)+H	PC	(16:0/20:4)	(16:0)	(20:4)			782.569	C44 H81 O8 N1 P1	0	758879	0	0	0	0	0	0	0	0	0	0	0	62754.6	475574	0	1.25221e+06	26497.6	0	0	0	0	0	0	0	0	4.53174e+07	0	7.83004e+07	0	1.40476e+07	0	0	0	0	0		782.569
0	PC(16:0/20:4)+HCOO	PC(36:4)+HCOO	PC	(16:0/20:4)	(16:0)	(20:4)			826.56	C45 H81 O10 N1 P1	0	0	0	0	0	0	0	0	0	0	0	0	0	0	0	0	0	0	2.00693e+06	0	1.1192e+06	0	378238	0	651052	0	0	0	0	0	0	0	398590	0	2.3509e+06	0
0	PC(36:4)+H	PC(36:4)+H	PC	(16:0/20:4)	(16:0)	(20:4)			782.569	C44 H81 O8 N1 P1	0	0	2.8242e+06	0	0	0	0	0	0	0	1.25452e+06	0	0	0	0	1.34949e+06	0	8.95201e+06	2.11733e+08	0	1.02467e+06	0	2.8149e+06	0	425255	0	368267	0	533380	0	2.11765e+06	0	2.64871e+07	0	2.44279e+06	39894.2			782.569
0	PC(16:0/20:4)+HCOO	PC(36:4)+HCOO	PC	(16:0/20:4)	(16:0)	(20:4)			826.56	C45 H81 O10 N1 P1	1.81629e+07	0	2.1236e+08	0	2.07514e+08	0	2.25576e+08	0	1.08638e+07	0	2.03398e+08	20489.8	5.96966e+06	0	0	5.39519e+06	0	3.48507e+08	0	0	0	0	0	0	0	0	0	0	0	0	0	0	0	0	0	0	826.561		826.561
0	PC(36:4)+H	PC(36:4)+H	PC	(16:0/20:4)	(16:0)	(20:4)			782.569	C44 H81 O8 N1 P1	1.93071e+08	0	3.78969e+09	0	3.60042e+09	0	4.11524e+09	0	8.96116e+07	0	3.45197e+09	0	4.88597e+07	0	256742	4.3944e+07	117137	5.81662e+09	16234.6	0	0	3.89308e+06	0	4.10643e+06	0	0	0	0	64743.4	347476	1.18182e+06	690580	0	589413	0	0	782.569		782.568
0	PC(16:0/20:4)+HCOO	PC(36:4)+HCOO	PC	(16:0/20:4)	(16:0)	(20:4)			826.56	C45 H81 O10 N1 P1	0	0	0	0	0	0	0	0	0	0	0	0	0	0	0	0	0	0	0	0	577.133	0	0	0	0	0	0	0	0	0	0	7.33061e+07	0	0	0	0
0	PC(36:4)+H	PC(36:4)+H	PC	(16:0/20:4)	(16:0)	(20:4)			782.569	C44 H81 O8 N1 P1	0	0	1.90787e+06	0	2.34334e+06	0	21388.3	0	2392.41	0	1.28128e+06	0	0	0	46484.3	143273	0	2.62612e+06	0	555522	0	0	0	0	0	0	0	0	556920	1.73438e+06	0	9.7275e+08	0	0	0	0			782.569
0	PC(16:0/20:4)+HCOO	PC(36:4)+HCOO	PC	(16:0/20:4)	(16:0)	(20:4)			826.56	C45 H81 O10 N1 P1	0	0	0	0	0	0	0	0	0	0	0	0	0	0	0	0	0	0	0	0	0	0	0	0	0	0	0	0	0	2.85381e+08	0	0	0	0	0	0
0	PC(36:4)+H	PC(36:4)+H	PC	(16:0/20:4)	(16:0)	(20:4)			782.569	C44 H81 O8 N1 P1	1.20676e+06	0	1.17615e+07	0	1.54816e+06	0	3.77845e+06	0	3290.74	0	1.30344e+06	0	4618.26	0	69328	1.05556e+07	0	5.52838e+07	2334.85	0	19701.7	0	13140.2	0	402208	0	2720.45	0	0	5.89185e+09	0	162369	0	0	0	0	782.569		782.569
0	PC(16:0/20:4)+HCOO	PC(36:4)+HCOO	PC	(16:0/20:4)	(16:0)	(20:4)			826.56	C45 H81 O10 N1 P1	0	0	0	0	0	0	0	0	0	0	0	0	0	0	0	0	0	0	0	0	0	0	0	0	0	0	0	1.56325e+07	0	0	0	0	0	0	0	0
0	PC(36:4)+H	PC(36:4)+H	PC	(16:0/20:4)	(16:0)	(20:4)			782.569	C44 H81 O8 N1 P1	0	162785	115971	63113.7	131856	0	0	0	0	0	0	0	0	0	0	0	4054.46	6436.49	0	0	0	0	0	0	0	2.80944e+06	0	2.24871e+08	0	2.36385e+06	0	0	0	0	0	0		782.569	782.569
0	PC(16:0/20:4)+HCOO	PC(36:4)+HCOO	PC	(16:0/20:4)	(16:0)	(20:4)			826.56	C45 H81 O10 N1 P1	0	0	0	0	0	0	0	0	0	0	0	0	0	0	0	0	0	0	0	0	0	0	0	35477.6	0	1.9091e+08	0	0	0	0	0	0	0	0	0	0
0	PC(36:4)+H	PC(36:4)+H	PC	(16:0/20:4)	(16:0)	(20:4)			782.569	C44 H81 O8 N1 P1	0	0	0	0	0	0	0	0	0	0	0	0	0	0	0	0	0	0	0	2.55538e+06	0	290622	0	1.30516e+06	0	3.95698e+09	0	889606	0	1.45205e+06	0	136641	0	4584.23	0	0
0	PC(16:0/20:4)+HCOO	PC(36:4)+HCOO	PC	(16:0/20:4)	(16:0)	(20:4)			826.56	C45 H81 O10 N1 P1	0	0	0	0	0	0	0	0	0	0	0	0	0	0	0	0	0	0	0	1.09223e+08	0	1.57622e+08	0	2.76764e+08	0	0	0	0	0	0	0	0	0	0	0	0
0	PC(36:4)+H	PC(36:4)+H	PC	(16:0/20:4)	(16:0)	(20:4)			782.569	C44 H81 O8 N1 P1	0	62013.3	0	0	0	0	224256	0	0	0	0	0	0	0	169945	0	0	152263	0	1.86259e+09	0	2.99914e+09	0	5.41908e+09	0	1.57567e+08	0	609284	0	0	221525	167541	0	89971.8	0	0
0	PC(16:0/20:4)+HCOO	PC(36:4)+HCOO	PC	(16:0/20:4)	(16:0)	(20:4)			826.56	C45 H81 O10 N1 P1	0	0	0	0	0	0	0	0	0	0	0	0	0	0	0	0	0	0	0	114079	0	0	0	0	0	0	0	0	0	0	0	0	0	0	0	1.76128e+07
0	PC(36:4)+H	PC(36:4)+H	PC	(16:0/20:4)	(16:0)	(20:4)			782.569	C44 H81 O8 N1 P1	0	0	3685.94	0	0	0	0	0	0	0	0	0	0	0	0	0	0	4617.2	0	2.54321e+07	0	4.39911e+07	0	5.88336e+07	0	5512.3	0	0	150.636	0	0	0	0	612052	0	2.72584e+08			782.569
0	PC(16:0/20:4)+HCOO	PC(36:4)+HCOO	PC	(16:0/20:4)	(16:0)	(20:4)			826.56	C45 H81 O10 N1 P1	0	0	0	0	0	0	0	0	0	0	0	0	0	0	0	0	0	0	0	0	0	0	0	0	0	0	0	0	0	0	0	0	0	6.91629e+07	0	0
0	PC(36:4)+H	PC(36:4)+H	PC	(16:0/20:4)	(16:0)	(20:4)			782.569	C44 H81 O8 N1 P1	0	0	1976.09	0	0	0	0	0	0	0	0	54.811	0	0	1.25718e+06	0	0	0	0	464336	0	499.513	0	17912	0	0	0	262504	0	3068.05	398163	0	0	1.78637e+07	0	7.54306e+07			782.569
0	PC(16:0/20:4)+HCOO	PC(36:4)+HCOO	PC	(16:0/20:4)	(16:0)	(20:4)			826.56	C45 H81 O10 N1 P1	0	0	0	0	0	0	0	0	0	0	0	1.58318e+06	0	452807	0	0	0	0	0	0	0	0	0	0	0	0	0	0	0	0	0	0	0	0	0	0
0	PC(36:4)+H	PC(36:4)+H	PC	(16:0/20:4)	(16:0)	(20:4)			782.569	C44 H81 O8 N1 P1	0	0	105326	0	572557	0	64132	0	0	0	168286	2.69303e+07	0	1.08394e+07	0	110982	0	543306	0	0	0	663.628	0	22603.7	0	6216.54	0	0	0	393689	0	1233.38	0	2.23568e+07	0	0			782.569
0	PC(36:4e)+H	PC(36:4e)+H	PC	(36:4e)	(36:4e)				768.59	C44 H83 O7 N1 P1	1.22529e+06	0	2.77139e+07	0	2.38373e+07	0	2.38838e+07	0	541244	0	1.84659e+07	0	0	0	0	269882	0	4.29592e+07	0	0	0	0	0	0	0	0	0	0	0	0	0	168584	0	0	0	160364	768.59		768.589
0	PC(36:4e)+H	PC(36:4e)+H	PC	(36:4e)	(36:4e)				768.59	C44 H83 O7 N1 P1	37962.9	0	2.74179e+06	0	413262	0	7691.28	0	41394.1	0	26001.4	0	0	0	0	0	0	8.04143e+06	0	0	0	0	0	0	0	0	0	0	0	0	0	7.59082e+06	0	0	0	0	768.59		768.59
0	PC(36:4e)+H	PC(36:4e)+H	PC	(36:4e)	(36:4e)				768.59	C44 H83 O7 N1 P1	0	0	0	0	0	0	0	0	0	0	0	0	0	0	0	0	0	428610	0	0	0	0	0	0	0	0	0	0	0	6.25464e+07	0	4961.54	0	0	0	0
0	PC(36:4p)+H	PC(36:4p)+H	PC	(36:4p)	(36:4p)				766.575	C44 H81 O7 N1 P1	261037	0	1.31961e+06	0	1.37936e+06	0	4.1898e+06	0	109951	0	4.0169e+06	0	0	0	0	111028	0	754082	0	0	0	0	0	0	0	0	0	268.596	0	4.7543e+06	0	9.79441e+06	0	0	0	0	766.575
0	PC(36:4p)+H	PC(36:4p)+H	PC	(36:4p)	(36:4p)				766.575	C44 H81 O7 N1 P1	5352.85	0	1.65807e+06	0	946458	0	1.01356e+06	0	257930	0	1.64769e+06	0	0	0	0	503482	0	2.41448e+06	0	338174	14269.3	2.85687e+08	0	2.89566e+08	0	1.54187e+06	0	1.69831e+06	1553.98	1.04325e+06	0	848668	0	248677	0	0	766.575		766.575
0	PC(16:0/20:5)+HCOO	PC(36:5)+HCOO	PC	(16:0/20:5)	(16:0)	(20:5)			824.545	C45 H79 O10 N1 P1	0	0	3000.85	0	1.08089e+06	0	1.21503e+06	0	0	0	3860.82	0	0	0	0	0	0	1.34368e+06	0	0	0	0	0	0	0	0	0	0	0	0	0	0	0	0	0	0			824.545
0	PC(36:5)+H	PC(36:5)+H	PC	(16:0/20:5)	(16:0)	(20:5)			780.554	C44 H79 O8 N1 P1	62575.7	0	7.19917e+06	133327	6.86597e+06	60792.2	8.86888e+06	265754	70466.5	189511	6878137	0	45242.9	0	6.62832e+06	31849	122869	1.55688e+07	0	112294	0	50537	1.27652e+06	162295	0	251081	0	514695	152844	1.3554e+06	0	2.3653e+06	0	0	0	139903	780.554		780.552
0	PC(36:5)+H	PC(36:5)+H	PC	(36:5)	(36:5)				780.554	C44 H79 O8 N1 P1	0	419386	30410.1	53141.1	2.40316e+06	0	4.70844e+07	0	0	0	1.43089e+06	0	0	0	0	1329.67	1.05623e+06	240298	599723	0	12377.4	305046	224717	132611	887.288	0	179485	1302.81	3.53673e+06	0	307376	2.63706e+06	0	195991	66285	70698.1		780.554	780.554
0	PC(36:5)+H	PC(36:5)+H	PC	(36:5)	(36:5)				780.554	C44 H79 O8 N1 P1	507564	628078	5.6227e+06	0	6.76517e+07	0	1.64181e+06	0	2.49428e+07	0	1.58166e+06	0	673387	0	85828	1.56193e+07	143726	9.19421e+07	23447.4	1.38524e+07	78647.2	1.73198e+07	0	2.64771e+07	39667.9	79187.5	119447	722310	0	1.55261e+07	7.93839e+06	0	26900.9	52479.8	237426	36294.3	780.554	780.554	780.554
0	PC(36:5)+H	PC(36:5)+H	PC	(36:5)	(36:5)				780.554	C44 H79 O8 N1 P1	1667.42	0	44146.6	0	5516.73	0	123188	0	2395.45	0	0	2.06104e+06	664.499	924079	0	84010.9	396068	889.601	3357.95	425948	2589.59	798337	36472.2	285432	0	1.63048e+07	0	0	0	7616.61	0	70405.7	488673	0	90041.8	0	780.554		780.554
0	PC(36:5)+H	PC(36:5)+H	PC	(36:5)	(36:5)				780.554	C44 H79 O8 N1 P1	2216.81	0	57836.9	0	135058	62655.9	540345	34826.1	2148.41	132011	1761.01	0	1198.73	0	0	197587	55633.3	920324	205444	100050	38815.6	5.66939e+06	0	1.32288e+07	0	0	393589	9.87483e+06	0	58130.1	0	6320.66	78699.1	256831	1.12495e+06	1578.19	780.554		780.554
0	PC(36:5)+H	PC(36:5)+H	PC	(36:5)	(36:5)				780.554	C44 H79 O8 N1 P1	0	671450	334608	1.37708e+06	338092	0	706349	0	0	0	5968.73	0	696.894	0	0	272535	2.60598e+06	236290	0	2.69784e+06	0	115271	0	117792	0	1.59808e+07	0	663986	709455	315759	0	773.186	797.916	132746	0	0		780.554	780.554
0	PC(16:1/20:4)+HCOO	PC(36:5)+HCOO	PC	(16:1/20:4)	(16:1)	(20:4)			824.545	C45 H79 O10 N1 P1	0	0	0	0	0	0	0	0	0	0	0	0	0	0	0	0	0	0	0	0	0	4.05996e+06	0	6.55165e+06	0	0	0	0	0	0	0	0	0	0	0	0
0	PC(36:5)+H	PC(36:5)+H	PC	(16:1/20:4)	(16:1)	(20:4)			780.554	C44 H79 O8 N1 P1	0	0	908642	0	102618	0	124218	0	0	0	3425.65	0	0	0	242084	27141.1	0	2.21912e+06	0	718248	0	5.08988e+07	0	1.14949e+07	0	5.12255e+06	0	694037	45087.6	1.71663e+06	148271	592707	0	1.02442e+06	0	130132			780.554
0	PC(36:6)+H	PC(36:6)+H	PC	(36:6)	(36:6)				778.538	C44 H77 O8 N1 P1	1439.52	0	1.44933e+06	0	1.28783e+06	0	9761.62	0	0	0	2.18036e+06	0	0	0	0	0	0	1.73543e+06	0	0	0	0	0	1926.17	0	0	0	0	407969	0	269112	234128	0	51476.3	0	0	778.538		778.538
0	PC(16:0/21:1)+H	PC(37:1)+H	PC	(16:0/21:1)	(16:0)	(21:1)			802.632	C45 H89 O8 N1 P1	124753	0	3.30287e+07	0	3.67494e+07	0	2.90918e+07	0	0	0	2.50896e+07	0	0	0	0	0	93631.4	4.82682e+07	0	0	0	232230	0	374788	0	0	0	0	0	813409	0	163222	0	0	0	0	802.632		802.632
1	PC(16:0/21:1)+H	PC(37:1)+H	PC	(16:0/21:1)	(16:0)	(21:1)			802.632	C45 H89 O8 N1 P1	0	0	0	119456	558.851	0	2.12645e+06	0	0	0	272498	0	0	0	0	0	0	0	0	0	0	0	0	0	0	0	0	0	0	0	0	6.53663e+06	0	0	0	0
0	PC(16:0/21:1)+H	PC(37:1)+H	PC	(16:0/21:1)	(16:0)	(21:1)			802.632	C45 H89 O8 N1 P1	0	0	915770	0	0	0	0	0	0	0	0	0	0	0	0	188525	0	1.08366e+07	0	0	0	0	0	0	0	0	0	0	0	1.24036e+08	0	0	0	0	0	0
0	PC(16:0/21:1)+H	PC(37:1)+H	PC	(16:0/21:1)	(16:0)	(21:1)			802.632	C45 H89 O8 N1 P1	0	0	0	0	0	0	7528.07	0	0	0	0	0	0	0	0	0	0	0	0	0	0	2.75604e+06	0	37482.2	0	6.01465e+07	0	262862	0	0	0	0	0	0	0	0
0	PC(16:0/21:1)+H	PC(37:1)+H	PC	(16:0/21:1)	(16:0)	(21:1)			802.632	C45 H89 O8 N1 P1	0	0	0	0	0	0	0	0	0	0	0	0	0	0	0	0	0	0	0	3.63074e+07	0	8.65447e+07	0	1.20525e+08	99987.1	3.80704e+06	104086	0	26007.4	348514	0	0	0	0	0	0
0	PC(37:1)+H	PC(37:1)+H	PC	(37:1)	(37:1)				802.632	C45 H89 O8 N1 P1	0	0	0	0	0	0	0	0	0	0	0	0	0	0	0	0	0	0	0	1.76232e+06	0	5.04061e+06	0	4.55061e+06	0	0	0	0	0	0	0	0	0	0	0	0
0	PC(19:1/18:1)+H	PC(37:2)+H	PC	(19:1/18:1)	(19:1)	(18:1)			800.616	C45 H87 O8 N1 P1	0	0	7.2793e+06	0	9.67842e+06	0	7.3801e+06	0	0	0	5.90042e+06	0	0	0	0	0	0	1.29866e+07	0	3.04759e+06	0	2.89174e+06	0	1.99015e+06	0	0	0	0	0	3.53551e+07	0	1.27812e+06	0	0	0	820623			800.616
0	PC(17:0/20:4)+HCOO	PC(37:4)+HCOO	PC	(17:0/20:4)	(17:0)	(20:4)			840.576	C46 H83 O10 N1 P1	0	0	2.5004e+06	0	2.62686e+06	0	88977.7	0	0	0	1.29147e+06	0	0	0	0	0	0	3.70601e+06	0	0	0	0	0	0	0	0	0	0	0	0	0	0	0	0	0	0			840.576
0	PC(37:4)+H	PC(37:4)+H	PC	(17:0/20:4)	(17:0)	(20:4)			796.585	C45 H83 O8 N1 P1	1.46811e+06	0	2.39386e+07	0	3.93518e+07	0	3.24365e+07	0	1.28864e+06	0	3.4876e+07	0	977897	0	47626.4	9.59122e+06	0	6.64336e+07	0	0	0	0	0	0	0	0	0	0	0	0	0	0	0	0	0	0	796.585		796.584
0	PC(37:4)+H	PC(37:4)+H	PC	(37:4)	(37:4)				796.585	C45 H83 O8 N1 P1	0	0	2.08872e+06	0	415446	0	1.06871e+06	0	2570.31	0	702275	0	0	0	0	58042.3	0	8293.01	0	0	57189.3	0	1601.58	0	32394.4	0	18499.3	0	0	0	27679.5	9.78554e+06	0	0	0	0			796.585
0	PC(17:0/20:4)+HCOO	PC(37:4)+HCOO	PC	(17:0/20:4)	(17:0)	(20:4)			840.576	C46 H83 O10 N1 P1	0	0	70882.8	0	379771	0	2884.96	0	0	0	27589.8	0	0	0	0	0	0	43335.2	0	0	0	0	0	0	0	0	0	0	0	2.98228e+06	0	0	0	0	0	0			840.576
0	PC(37:4)+H	PC(37:4)+H	PC	(17:0/20:4)	(17:0)	(20:4)			796.585	C45 H83 O8 N1 P1	0	0	487784	0	9.40927e+07	0	2.88858e+08	0	213777	0	1.69724e+08	0	78285.6	0	0	0	0	5.62711e+06	0	0	0	0	0	0	0	0	0	0	0	8.38367e+07	0	1.37927e+06	73852	0	31007.2	0			796.585
0	PC(37:4)+H	PC(37:4)+H	PC	(37:4)	(37:4)				796.585	C45 H83 O8 N1 P1	0	0	5896.04	0	101886	0	209071	0	0	0	0	0	0	0	0	0	0	293041	0	0	0	0	0	0	0	8.28735e+07	0	6533.31	0	7261.51	0	0	0	0	0	0			796.585
0	PC(37:5)+H	PC(37:5)+H	PC	(37:5)	(37:5)				794.569	C45 H81 O8 N1 P1	1.54597e+06	0	624005	0	1.31813e+07	0	560509	0	66811.6	0	4.32848e+06	0	0	0	0	222504	0	5.39659e+07	0	188307	0	1990.7	0	0	0	0	416.733	0	0	4.23477e+06	0	6.74511e+07	0	85.775	175251	280780	794.569		794.569
0	PC(37:5)+H	PC(37:5)+H	PC	(37:5)	(37:5)				794.569	C45 H81 O8 N1 P1	469286	0	519233	0	325477	0	591185	0	184752	507.016	672983	0	281925	0	0	151730	1089.75	3080.07	0	0	0	3561.51	0	0	0	222890	0	0	0	7.38953e+07	0	126975	523.696	3018.09	882.154	0	794.569		794.569
0	PC(16:0/22:0)+HCOO	PC(38:0)+HCOO	PC	(16:0/22:0)	(16:0)	(22:0)			862.654	C47 H93 O10 N1 P1	2.19553e+06	0	9.53978e+06	0	1.0707e+07	0	1.05163e+07	0	628414	0	1.23532e+07	0	5413.75	0	0	0	0	1.16866e+07	0	0	0	20422.5	0	0	0	0	0	0	0	789.966	0	1.86364e+06	0	0	0	0	862.654		862.655
0	PC(38:1)+H	PC(38:1)+H	PC	(38:1)	(38:1)				816.648	C46 H91 O8 N1 P1	0	1.67632e+07	0	4.89169e+06	0	0	0	0	0	0	0	0	0	0	167057	0	16630.9	0	0	0	0	0	0	0	0	0	52368.9	0	77003.2	0	1.27184e+06	0	0	0	0	0		816.646
0	PC(38:1)+H	PC(38:1)+H	PC	(38:1)	(38:1)				816.648	C46 H91 O8 N1 P1	0	0	0	0	0	0	0	0	0	0	0	0	0	0	0	0	0	0	0	0	0	0	0	0	0	0	78306	0	51733.7	0	3.61348e+06	0	0	0	0	0
0	PC(16:0/22:1)+HCOO	PC(38:1)+HCOO	PC	(16:0/22:1)	(16:0)	(22:1)			860.639	C47 H91 O10 N1 P1	3.89265e+06	0	5.17286e+07	0	5.91073e+07	0	7.38622e+07	0	1.1223e+06	0	5.97969e+07	0	187986	0	0	144538	0	7.06694e+07	0	0	0	0	0	0	0	0	0	0	0	0	0	123303	0	0	12861.8	0	860.64		860.639
0	PC(38:1)+H	PC(38:1)+H	PC	(16:0/22:1)	(16:0)	(22:1)			816.648	C46 H91 O8 N1 P1	1.77205e+07	0	4.72556e+08	0	5.50192e+08	0	4.72517e+08	0	7.01536e+06	0	4.3663e+08	128617	3.08173e+06	0	0	2.14791e+06	0	6.60694e+08	0	0	0	0	0	0	0	0	0	0	0	4.67608e+06	0	358837	0	0	0	0	816.648		816.647
0	PC(18:0/20:1)+HCOO	PC(38:1)+HCOO	PC	(18:0/20:1)	(18:0)	(20:1)			860.639	C47 H91 O10 N1 P1	0	0	0	0	0	0	0	0	0	0	122244	0	0	0	0	0	0	111840	0	0	0	0	0	0	0	0	0	0	0	7.09954e+07	0	7.21708e+06	0	0	0	0
0	PC(38:1)+H	PC(38:1)+H	PC	(18:0/20:1)	(18:0)	(20:1)			816.648	C46 H91 O8 N1 P1	0	0	214982	0	297971	0	448385	0	0	0	334510	0	0	0	0	0	0	666433	0	684955	0	0	0	0	0	105149	0	0	0	1.43217e+09	0	9.05424e+07	0	0	0	384410			816.648
0	PC(18:0/20:1)+HCOO	PC(38:1)+HCOO	PC	(18:0/20:1)	(18:0)	(20:1)			860.639	C47 H91 O10 N1 P1	0	0	0	0	0	0	0	0	0	0	0	34772.3	0	0	0	0	0	0	0	0	0	0	0	0	0	0	0	4.39183e+06	0	0	0	0	0	0	0	0
0	PC(38:1)+H	PC(38:1)+H	PC	(18:0/20:1)	(18:0)	(20:1)			816.648	C46 H91 O8 N1 P1	0	313438	0	179894	0	0	0	0	0	0	0	0	0	0	0	0	725100	0	0	147743	0	0	0	0	0	2.24969e+06	0	4.025e+07	0	0	0	0	0	0	0	0		816.648
0	PC(18:0/20:1)+HCOO	PC(38:1)+HCOO	PC	(18:0/20:1)	(18:0)	(20:1)			860.639	C47 H91 O10 N1 P1	0	0	0	0	0	0	0	0	0	0	0	0	0	0	0	0	0	0	0	216018	0	3.05655e+07	0	4.01956e+07	26862.9	2.71206e+07	0	0	0	0	0	0	0	0	0	0
0	PC(38:1)+H	PC(38:1)+H	PC	(18:0/20:1)	(18:0)	(20:1)			816.648	C46 H91 O8 N1 P1	0	0	0	0	0	0	0	0	0	26661	0	227143	0	0	0	0	0	0	0	567291	0	6.41976e+08	0	1.0156e+09	0	4.96471e+08	0	400874	84576	0	0	0	0	0	0	0
0	PC(18:0/20:1)+HCOO	PC(38:1)+HCOO	PC	(18:0/20:1)	(18:0)	(20:1)			860.639	C47 H91 O10 N1 P1	0	0	0	0	0	0	0	0	0	0	0	0	0	0	0	0	0	0	66529.6	1.79245e+07	0	83736.1	0	86142.9	0	0	0	0	0	0	0	0	0	0	30658	3.02614e+06
0	PC(38:1)+H	PC(38:1)+H	PC	(18:0/20:1)	(18:0)	(20:1)			816.648	C46 H91 O8 N1 P1	0	0	0	0	0	0	0	144813	0	52038	34207.4	0	0	0	0	0	0	0	0	2.63453e+08	0	1.17051e+06	0	5.10016e+06	0	0	0	0	274123	0	182686	0	0	124786	0	3.06503e+07
0	PC(38:2)+H	PC(38:2)+H	PC	(38:2)	(38:2)				814.632	C46 H89 O8 N1 P1	28574.6	1.80953e+07	0	5.9295e+06	262049	0	0	0	0	0	0	0	0	0	392727	0	3.19614e+06	0	9.84012e+06	0	968023	0	471670	32256.2	4.15339e+06	0	9.65192e+06	0	5.02019e+06	0	1.33888e+07	0	2.9087e+06	0	1.36466e+06	0		814.632
1	PC(38:2)+H	PC(38:2)+H	PC	(38:2)	(38:2)				814.632	C46 H89 O8 N1 P1	0	1.79378e+07	0	5.9295e+06	0	0	0	0	0	0	0	0	0	0	1.06741e+07	0	65945	0	434684	0	870833	0	222467	32256.2	107613	0	6.12903e+06	0	5.41027e+06	0	8.14614e+06	0	2.69016e+06	0	585281	0
0	PC(38:2)+H	PC(38:2)+H	PC	(38:2)	(38:2)				814.632	C46 H89 O8 N1 P1	0	0	0	0	0	0	0	0	0	0	0	0	0	0	0	0	0	0	3.31767e+06	0	2319.49	0	0	0	103898	0	0	0	0	0	0	0	0	0	0	0
0	PC(20:1/18:1)+HCOO	PC(38:2)+HCOO	PC	(20:1/18:1)	(20:1)	(18:1)			858.623	C47 H89 O10 N1 P1	686792	0	1.94971e+07	0	2.16355e+07	0	2.22585e+07	0	147123	0	1.80003e+07	0	0	0	0	0	0	2.80901e+07	0	0	0	0	0	0	0	0	0	0	0	0	0	0	0	0	0	0	858.623		858.623
0	PC(38:2)+H	PC(38:2)+H	PC	(20:1/18:1)	(20:1)	(18:1)			814.632	C46 H89 O8 N1 P1	8.83271e+06	0	4.45426e+07	0	2.17945e+08	0	5.20966e+07	0	4.8019e+06	0	4.03411e+07	0	2.792e+06	0	0	2.33862e+06	0	3.43973e+08	0	0	0	0	0	0	0	5.54986e+06	0	0	0	77558.1	0	3.27253e+06	0	0	0	0	814.631		814.631
1	PC(18:0/20:2)+HCOO	PC(38:2)+HCOO	PC	(18:0/20:2)	(18:0)	(20:2)			858.623	C47 H89 O10 N1 P1	682681	0	3.52585e+06	0	1.74125e+07	0	2.55185e+06	0	142263	0	9.91475e+06	0	0	0	0	0	0	5.22014e+06	0	0	0	0	0	0	0	0	0	0	0	0	0	0	0	0	0	0	858.623		858.623
1	PC(38:2)+H	PC(38:2)+H	PC	(18:0/20:2)	(18:0)	(20:2)			814.632	C46 H89 O8 N1 P1	536483	0	4.64292e+07	0	1.73454e+08	0	5.39107e+07	0	136266	0	9.72262e+07	0	216701	0	0	115732	0	8.92849e+07	0	0	0	0	0	0	0	5.55854e+06	0	0	0	328452	0	3.30127e+06	0	0	0	0	814.632		814.632
1	PC(20:1/18:1)+HCOO	PC(38:2)+HCOO	PC	(20:1/18:1)	(20:1)	(18:1)			858.623	C47 H89 O10 N1 P1	0	0	0	0	0	0	0	0	0	0	0	0	0	0	0	0	0	0	0	0	0	0	0	0	0	0	0	0	0	77976.3	0	3.30754e+06	0	0	0	0
1	PC(38:2)+H	PC(38:2)+H	PC	(20:1/18:1)	(20:1)	(18:1)			814.632	C46 H89 O8 N1 P1	0	0	0	0	0	0	158243	0	0	0	0	0	0	0	0	0	0	749244	0	0	0	2.26858e+06	0	9.04527e+06	0	146729	0	0	0	3.85135e+06	0	4.21692e+07	0	47903	0	0
0	PC(20:1/18:1)+HCOO	PC(38:2)+HCOO	PC	(20:1/18:1)	(20:1)	(18:1)			858.623	C47 H89 O10 N1 P1	0	0	20780.3	0	25781.5	0	1.54998e+06	0	0	0	50229.8	0	0	0	0	0	0	210623	0	0	0	0	0	0	0	0	0	0	0	3.13309e+07	7280.91	0	0	0	0	0			858.623
0	PC(38:2)+H	PC(38:2)+H	PC	(20:1/18:1)	(20:1)	(18:1)			814.632	C46 H89 O8 N1 P1	0	0	258190	0	0	0	338309	0	0	0	0	0	0	0	0	0	0	0	5707.07	0	0	1.77051e+07	0	26798	0	0	0	745.784	0	6.60834e+08	0	380191	0	0	0	0			814.632
0	PC(38:2)+H	PC(38:2)+H	PC	(38:2)	(38:2)				814.632	C46 H89 O8 N1 P1	0	0	0	0	0	0	0	0	0	0	0	0	0	0	0	0	0	0	0	0	0	0	0	0	0	681643	0	3.64639e+07	0	44905.1	0	0	0	4.17108e+06	0	0
0	PC(20:1/18:1)+HCOO	PC(38:2)+HCOO	PC	(20:1/18:1)	(20:1)	(18:1)			858.623	C47 H89 O10 N1 P1	0	0	0	0	0	0	0	0	0	0	0	0	0	0	0	0	0	126.74	24028.7	0	0	0	0	0	0	1.96445e+07	0	0	0	0	0	0	0	0	0	0
0	PC(38:2)+H	PC(38:2)+H	PC	(20:1/18:1)	(20:1)	(18:1)			814.632	C46 H89 O8 N1 P1	0	0	0	0	0	0	0	59560.4	0	0	0	201712	0	87841.9	0	0	0	0	0	0	0	602365	0	8.27752e+06	0	4.25737e+08	0	0	0	0	0	0	0	0	0	0
0	PC(20:1/18:1)+HCOO	PC(38:2)+HCOO	PC	(20:1/18:1)	(20:1)	(18:1)			858.623	C47 H89 O10 N1 P1	0	0	0	0	0	0	0	0	0	24557.5	0	60984.3	0	0	0	0	0	0	0	9.50633e+06	0	1.9772e+07	0	2.48601e+07	0	48193.8	20128.8	0	0	176877	0	0	0	0	0	0
0	PC(38:2)+H	PC(38:2)+H	PC	(20:1/18:1)	(20:1)	(18:1)			814.632	C46 H89 O8 N1 P1	0	0	0	0	0	0	0	0	0	266626	0	690501	0	29672.7	0	0	0	0	0	2.28774e+08	20124	4.78796e+08	0	5.49115e+08	0	0	0	0	0	0	0	0	0	0	0	953088
0	PC(38:2)+H	PC(38:2)+H	PC	(38:2)	(38:2)				814.632	C46 H89 O8 N1 P1	0	0	0	0	0	0	0	1.05055e+06	0	126076	0	0	0	0	0	0	0	0	0	0	0	0	0	0	0	0	0	0	0	0	0	0	0	0	0	2.87287e+07
0	PC(18:0/20:3)+HCOO	PC(38:3)+HCOO	PC	(18:0/20:3)	(18:0)	(20:3)			856.607	C47 H87 O10 N1 P1	495493	0	1.07797e+07	0	1.25717e+07	0	1.1988e+07	0	207047	0	9.88602e+06	0	0	0	0	42577.8	0	1.73165e+07	0	0	0	0	0	0	0	0	0	0	0	0	0	4.64251e+06	0	0	0	0	856.607		856.609
0	PC(38:3)+H	PC(38:3)+H	PC	(18:0/20:3)	(18:0)	(20:3)			812.616	C46 H87 O8 N1 P1	7.05725e+06	0	1.91097e+08	0	1.8342e+08	0	1.10069e+07	0	1.94973e+06	0	1.57299e+08	0	978049	0	0	1.53796e+06	0	3.27666e+08	0	0	0	0	0	0	0	0	0	0	0	3.95748e+07	0	6.65222e+06	0	0	0	0	812.616		812.615
0	PC(18:0/20:3)+HCOO	PC(38:3)+HCOO	PC	(18:0/20:3)	(18:0)	(20:3)			856.607	C47 H87 O10 N1 P1	0	0	0	0	0	0	0	0	0	0	0	0	0	0	0	0	0	0	0	0	0	0	0	0	0	0	0	0	0	6.09805e+06	0	2.52774e+06	0	0	0	0
0	PC(38:3)+H	PC(38:3)+H	PC	(18:0/20:3)	(18:0)	(20:3)			812.616	C46 H87 O8 N1 P1	0	0	5595.54	0	0	0	0	0	0	0	71191.9	0	0	0	0	0	0	4.65071e+06	0	0	32805.3	0	0	0	0	0	0	0	0	1.89307e+08	0	4.27582e+07	0	0	0	0			812.616
0	PC(18:0/20:3)+HCOO	PC(38:3)+HCOO	PC	(18:0/20:3)	(18:0)	(20:3)			856.607	C47 H87 O10 N1 P1	0	0	312415	0	362097	0	198382	0	0	0	6795.35	0	0	0	0	0	0	2679.09	0	0	0	0	0	0	0	0	0	0	0	1.66373e+07	0	0	0	0	0	0			856.607
0	PC(38:3)+H	PC(38:3)+H	PC	(18:0/20:3)	(18:0)	(20:3)			812.616	C46 H87 O8 N1 P1	0	0	0	0	0	0	0	0	0	71057.9	0	0	0	0	0	0	0	0	0	0	0	0	0	0	0	0	0	0	0	4.47483e+08	0	6.71728e+06	0	0	0	0
0	PC(38:3)+H	PC(38:3)+H	PC	(38:3)	(38:3)				812.616	C46 H87 O8 N1 P1	0	0	0	0	0	0	344456	0	0	0	0	0	0	0	0	0	0	0	0	0	0	0	0	0	0	1.73909e+07	0	1.31498e+07	0	0	0	0	0	0	0	0
0	PC(18:0/20:3)+HCOO	PC(38:3)+HCOO	PC	(18:0/20:3)	(18:0)	(20:3)			856.607	C47 H87 O10 N1 P1	0	0	0	0	0	0	0	0	0	0	0	0	0	0	0	0	0	0	0	0	0	460981	0	2797.99	0	1.0843e+07	0	0	0	0	0	0	0	0	0	0
0	PC(38:3)+H	PC(38:3)+H	PC	(38:3)	(38:3)				812.616	C46 H87 O8 N1 P1	0	0	0	0	0	0	0	0	0	0	0	0	0	0	0	0	0	0	0	0	0	105291	0	0	0	0	59099.6	0	0	0	0	0	0	2.96705e+07	0	0
1	PC(38:4)+H	PC(38:4)+H	PC	(38:4)	(38:4)				810.601	C46 H85 O8 N1 P1	0	5.26512e+06	0	1.83594e+06	0	0	0	0	0	0	0	0	0	11759.3	2.084e+07	0	5.62245e+06	0	2.60497e+08	31389	1.50043e+07	46587.8	4.44336e+06	0	9.36193e+06	0	1.0695e+08	0	1.04848e+08	1.78532e+06	1.02189e+08	0	3.06418e+07	0	2.94684e+06	116971		810.601
1	PC(18:0/20:4)+HCOO	PC(38:4)+HCOO	PC	(18:0/20:4)	(18:0)	(20:4)			854.592	C47 H85 O10 N1 P1	0	0	0	0	0	0	0	0	0	0	0	0	0	0	0	0	0	0	0	0	0	0	0	0	0	0	1.36388e+06	0	2.5624e+06	0	17109.1	0	0	0	0	0
1	PC(38:4)+H	PC(38:4)+H	PC	(18:0/20:4)	(18:0)	(20:4)			810.601	C46 H85 O8 N1 P1	0	5.22804e+06	0	1.83594e+06	0	0	0	0	0	0	0	0	0	11759.3	2.084e+07	0	5.54339e+06	0	2.60497e+08	31389	1.50043e+07	41889.8	4.44336e+06	0	9.36193e+06	0	8.32679e+06	0	5.63677e+07	1.78532e+06	1.04965e+08	0	3.06418e+07	0	2.94684e+06	116971
1	PC(38:4)+H	PC(38:4)+H	PC	(38:4)	(38:4)				810.601	C46 H85 O8 N1 P1	0	5.22804e+06	0	1.83594e+06	0	0	0	0	0	0	0	0	0	11759.3	2.084e+07	0	5.54339e+06	0	2.60497e+08	31389	2782.33	41889.8	4.44336e+06	0	9.36193e+06	0	2.59523e+06	0	1.04848e+08	1.78532e+06	1.04965e+08	0	3.06418e+07	0	1.11595e+06	116971
0	PC(18:0/20:4)+HCOO	PC(38:4)+HCOO	PC	(18:0/20:4)	(18:0)	(20:4)			854.592	C47 H85 O10 N1 P1	0	0	0	0	0	0	0	0	0	0	0	0	0	0	0	0	0	0	912010	0	1.05629e+06	0	521194	0	1.6035e+06	0	0	0	0	0	0	0	0	0	1.57731e+06	0
0	PC(38:4)+H	PC(38:4)+H	PC	(18:0/20:4)	(18:0)	(20:4)			810.601	C46 H85 O8 N1 P1	0	5.22804e+06	0	1.83594e+06	0	0	0	0	0	0	0	0	0	11759.3	2.084e+07	0	5.54339e+06	0	2.43036e+08	38391.9	1.03971e+06	41889.8	4.87672e+06	0	2.88908e+06	0	1.0695e+08	0	1.04848e+08	1.78532e+06	1.02189e+08	0	3.76812e+07	0	1.75508e+06	116971
0	PC(16:0/22:4)+HCOO	PC(38:4)+HCOO	PC	(16:0/22:4)	(16:0)	(22:4)			854.592	C47 H85 O10 N1 P1	1.547e+06	0	2.28756e+07	0	2.16796e+07	0	2.10669e+07	0	1.13993e+07	0	1.59142e+08	0	4.7879e+06	0	0	312430	0	3.69362e+07	0	0	0	0	0	0	0	0	0	0	0	195444	0	7.5784e+06	0	0	0	0	854.593		854.592
0	PC(38:4)+H	PC(38:4)+H	PC	(16:0/22:4)	(16:0)	(22:4)			810.601	C46 H85 O8 N1 P1	1.74179e+08	0	3.42614e+08	0	2.23845e+09	0	2.69716e+08	0	6.85939e+06	0	2.08523e+09	0	4.43524e+07	0	394560	3.21548e+06	52482	2.71971e+09	0	0	0	0	0	0	0	0	53653.1	0	20099.5	1.63796e+06	98573.1	7.73844e+06	0	0	0	0	810.6		810.6
0	PC(16:0/22:4)+HCOO	PC(38:4)+HCOO	PC	(16:0/22:4)	(16:0)	(22:4)			854.592	C47 H85 O10 N1 P1	0	0	0	0	0	0	0	0	0	0	0	0	0	0	0	0	0	0	0	0	0	0	0	0	0	0	0	0	0	2.7642e+07	0	4.95685e+06	0	0	0	0
0	PC(38:4)+H	PC(38:4)+H	PC	(16:0/22:4)	(16:0)	(22:4)			810.601	C46 H85 O8 N1 P1	1.0184e+07	0	2.00247e+08	0	1.47199e+06	0	2.18422e+08	0	5.73408e+06	0	1.84875e+08	0	3.16145e+06	0	0	99675.7	0	770937	0	0	0	0	4222.5	0	0	0	0	0	0	6.32696e+08	0	1.25186e+09	0	0	0	0	810.601		810.601
0	PC(18:0/20:4)+HCOO	PC(38:4)+HCOO	PC	(18:0/20:4)	(18:0)	(20:4)			854.592	C47 H85 O10 N1 P1	0	0	0	0	0	0	0	0	0	0	0	0	0	0	0	0	0	0	0	0	0	0	0	0	0	0	0	0	0	2.0133e+08	0	0	0	0	0	0
0	PC(18:0/20:4)+HCOO	PC(38:4)+HCOO	PC	(18:0/20:4)	(18:0)	(20:4)			854.592	C47 H85 O10 N1 P1	0	0	0	0	0	0	0	0	70239.8	0	0	0	0	0	0	0	0	0	0	0	0	0	0	0	0	26014.6	0	1.85895e+07	0	0	0	0	0	0	0	0
0	PC(38:4)+H	PC(38:4)+H	PC	(18:0/20:4)	(18:0)	(20:4)			810.601	C46 H85 O8 N1 P1	0	0	0	0	0	0	0	0	0	0	0	0	0	0	0	0	0	0	0	482.927	0	0	0	0	0	7.71412e+07	0	1.71445e+07	0	5294.97	16079.5	0	0	0	0	0
0	PC(18:0/20:4)+HCOO	PC(38:4)+HCOO	PC	(18:0/20:4)	(18:0)	(20:4)			854.592	C47 H85 O10 N1 P1	0	0	0	0	0	0	0	0	0	0	0	0	0	0	0	0	0	0	0	2959.37	0	1749.44	0	3571.33	0	1.561e+08	0	0	0	0	0	0	0	0	0	0
0	PC(38:4)+H	PC(38:4)+H	PC	(18:0/20:4)	(18:0)	(20:4)			810.601	C46 H85 O8 N1 P1	0	0	0	0	0	0	0	0	0	0	0	0	0	0	0	0	0	0	0	2.70424e+07	0	4.52062e+06	0	1.29825e+07	0	2.74566e+09	0	2.78116e+07	0	0	448083	0	0	0	0	0
0	PC(16:0/22:4)+HCOO	PC(38:4)+HCOO	PC	(16:0/22:4)	(16:0)	(22:4)			854.592	C47 H85 O10 N1 P1	0	0	0	0	0	0	0	0	0	0	0	0	0	0	0	0	0	0	0	1.01596e+07	0	1.3629e+07	0	3.59063e+07	0	368122	0	0	0	0	0	0	0	0	0	373296
0	PC(38:4)+H	PC(38:4)+H	PC	(16:0/22:4)	(16:0)	(22:4)			810.601	C46 H85 O8 N1 P1	0	0	0	0	0	0	0	0	0	37793.7	0	0	0	0	0	0	0	0	0	2.66014e+08	0	5.33125e+08	0	1.10198e+09	0	1.09565e+08	0	0	97278.7	0	0	0	0	0	0	5.8069e+06
0	PC(18:0/20:4)+HCOO	PC(38:4)+HCOO	PC	(18:0/20:4)	(18:0)	(20:4)			854.592	C47 H85 O10 N1 P1	0	0	0	0	0	0	0	0	0	0	0	0	0	0	0	0	0	0	0	8.77648e+07	0	7.37374e+07	0	7.2954e+07	0	0	0	0	0	0	0	0	0	0	0	184249
0	PC(38:4)+H	PC(38:4)+H	PC	(18:0/20:4)	(18:0)	(20:4)			810.601	C46 H85 O8 N1 P1	0	0	0	0	0	0	0	0	0	0	0	0	0	0	74368.6	0	0	0	0	8.95857e+08	0	7.05197e+07	31784.2	6.77805e+07	0	709085	0	0	0	0	0	0	0	105480	0	3.37027e+07
0	PC(16:0/22:4)+HCOO	PC(38:4)+HCOO	PC	(16:0/22:4)	(16:0)	(22:4)			854.592	C47 H85 O10 N1 P1	0	0	0	0	0	0	0	0	0	0	0	1371.07	0	0	0	0	0	0	0	0	0	0	0	27174	0	0	0	0	0	0	0	0	0	2.88387e+06	0	0
0	PC(38:4)+H	PC(38:4)+H	PC	(16:0/22:4)	(16:0)	(22:4)			810.601	C46 H85 O8 N1 P1	0	0	254236	0	98061.5	0	90369.1	0	0	0	61480.5	277566	0	0	0	0	0	1.30405e+06	0	0	0	0	0	462265	0	0	0	0	0	0	0	0	0	1.20508e+09	0	1.59874e+07			810.601
0	PC(38:4p)+H	PC(38:4p)+H	PC	(38:4p)	(38:4p)				794.606	C46 H85 O7 N1 P1	0	0	6.37217e+06	0	8.25785e+06	0	8.19925e+06	0	50920.2	0	5.73785e+06	0	0	0	0	0	0	1.30857e+07	0	0	0	0	0	0	0	0	0	0	0	7.25805e+06	0	262369	0	0	0	0			794.606
0	PC(38:4p)+H	PC(38:4p)+H	PC	(38:4p)	(38:4p)				794.606	C46 H85 O7 N1 P1	0	0	0	0	0	0	0	0	0	0	0	0	0	0	0	0	0	145639	0	0	0	1.36255e+06	0	4.53977e+06	0	6.41069e+06	0	0	0	202490	0	48223.5	0	195.198	0	0
0	PC(38:5)+H	PC(38:5)+H	PC	(38:5)	(38:5)				808.585	C46 H83 O8 N1 P1	0	901341	0	0	0	0	0	0	0	0	0	0	0	0	0	0	225593	0	161125	0	46109.2	0	0	0	191107	0	8.83532e+07	0	6.65382e+06	0	3.48228e+06	0	245585	0	114416	0		808.585
0	PC(38:5)+H	PC(38:5)+H	PC	(38:5)	(38:5)				808.585	C46 H83 O8 N1 P1	736907	0	220525	0	1.79012e+06	0	988557	0	827812	0	0	0	654597	0	0	0	0	0	1.88134e+07	0	3.77205e+06	0	4.47022e+06	0	2.96985e+06	0	279799	0	109806	0	242241	0	1.19489e+07	0	1.72e+07	0
0	PC(18:1/20:4)+HCOO	PC(38:5)+HCOO	PC	(18:1/20:4)	(18:1)	(20:4)			852.576	C47 H83 O10 N1 P1	4.68122e+06	0	4.75579e+07	0	4.67997e+07	0	4.95926e+07	0	3.23348e+06	0	5.08804e+07	0	1.17501e+06	0	0	1.2345e+06	0	7.94323e+07	0	0	0	0	0	0	0	0	0	0	0	0	0	256396	0	0	0	0	852.577		852.576
0	PC(38:5)+H	PC(38:5)+H	PC	(18:1/20:4)	(18:1)	(20:4)			808.585	C46 H83 O8 N1 P1	5.39615e+07	0	8.62457e+08	0	9.13309e+08	0	9.33703e+08	79036.6	2.60644e+07	136120	2.80265e+07	0	1.61429e+07	0	0	1.46388e+07	45409.5	1.47142e+09	0	540438	0	588328	0	2.18864e+06	0	136241	0	167855	0	172275	216280	5.05395e+07	0	0	0	0	808.584		808.584
0	PC(18:1/20:4)+HCOO	PC(38:5)+HCOO	PC	(18:1/20:4)	(18:1)	(20:4)			852.576	C47 H83 O10 N1 P1	0	0	0	0	0	0	0	0	0	0	0	0	0	17.483	0	0	0	891642	0	0	0	0	0	0	0	0	0	0	0	173608	0	1.61077e+07	0	0	0	0
0	PC(38:5)+H	PC(38:5)+H	PC	(18:1/20:4)	(18:1)	(20:4)			808.585	C46 H83 O8 N1 P1	0	0	479385	0	977068	0	115660	0	0	0	1.55426e+06	0	0	0	31224.6	6305.29	172796	1.4178e+07	0	0	0	0	0	0	0	0	0	495081	0	1.49097e+06	0	2.28568e+08	0	0	0	2009.35			808.585
0	PC(38:5)+H	PC(38:5)+H	PC	(38:5)	(38:5)				808.585	C46 H83 O8 N1 P1	7883.94	3124.53	11486.5	0	1.28147e+07	0	5.50311e+06	0	0	0	8.62758e+06	0	0	0	1178.77	239833	0	2.60149e+06	6581.18	1130.01	86418.3	755.149	57186.2	178102	45147.7	1044.71	0	0	0	1.43832e+09	269155	185568	0	0	0	0	808.585	808.585	808.585
0	PC(16:0/22:5)+HCOO	PC(38:5)+HCOO	PC	(16:0/22:5)	(16:0)	(22:5)			852.576	C47 H83 O10 N1 P1	0	0	141178	0	306684	0	0	0	0	0	2999.68	0	0	0	0	0	0	62790	0	0	0	0	0	0	0	0	0	0	0	2.47181e+06	0	0	0	0	0	0			852.576
0	PC(18:1/20:4)+HCOO	PC(38:5)+HCOO	PC	(18:1/20:4)	(18:1)	(20:4)			852.576	C47 H83 O10 N1 P1	0	0	0	0	0	0	0	0	0	0	0	0	0	0	0	0	0	0	0	0	0	0	0	0	0	1252.54	0	4.91073e+06	0	3351.49	0	0	0	0	0	0
0	PC(38:5)+H	PC(38:5)+H	PC	(18:1/20:4)	(18:1)	(20:4)			808.585	C46 H83 O8 N1 P1	0	0	0	0	0	0	0	0	0	0	0	0	0	0	0	0	70745.1	1564.26	0	272626	0	0	0	0	0	5464.89	0	6.63002e+07	0	12624.9	604080	0	0	0	0	143306
0	PC(18:1/20:4)+HCOO	PC(38:5)+HCOO	PC	(18:1/20:4)	(18:1)	(20:4)			852.576	C47 H83 O10 N1 P1	0	0	0	0	0	0	0	0	0	0	0	0	0	0	0	0	0	0	0	0	0	0	0	1240.97	0	4.64638e+07	0	0	16059.1	0	0	0	0	0	0	0
0	PC(38:5)+H	PC(38:5)+H	PC	(18:1/20:4)	(18:1)	(20:4)			808.585	C46 H83 O8 N1 P1	0	63820.9	0	0	0	0	0	0	0	0	0	230994	0	0	0	0	160485	0	0	4334.53	0	3.06672e+06	66039.2	4.69257e+06	0	1.04359e+09	0	175841	0	4.15435e+06	0	0	0	406521	0	0		808.585
0	PC(18:1/20:4)+HCOO	PC(38:5)+HCOO	PC	(18:1/20:4)	(18:1)	(20:4)			852.576	C47 H83 O10 N1 P1	0	0	0	0	0	0	0	0	0	0	0	0	0	0	0	0	0	0	0	2.40113e+07	0	3.77443e+07	0	5.8195e+07	0	0	0	0	0	0	0	0	0	0	0	72430.4
0	PC(38:5)+H	PC(38:5)+H	PC	(18:1/20:4)	(18:1)	(20:4)			808.585	C46 H83 O8 N1 P1	0	0	0	0	0	0	0	0	0	0	0	992770	0	0	41413.6	0	70588.5	0	0	4.20778e+08	0	7.08629e+08	0	1.25378e+09	0	1.07642e+07	0	252678	0	0	0	0	582221	0	0	4.0039e+06
0	PC(18:1/20:4)+HCOO	PC(38:5)+HCOO	PC	(18:1/20:4)	(18:1)	(20:4)			852.576	C47 H83 O10 N1 P1	0	0	0	0	0	0	0	0	0	0	0	0	0	0	0	0	0	0	0	0	0	0	179.672	181430	0	0	0	0	0	0	0	0	0	0	0	4.73413e+06
0	PC(38:5)+H	PC(38:5)+H	PC	(18:1/20:4)	(18:1)	(20:4)			808.585	C46 H83 O8 N1 P1	0	0	2974.39	0	0	31788.1	0	216552	0	134311	0	0	0	0	0	0	29154.2	0	0	8.3344e+06	0	8.99643e+06	0	2.58307e+06	0	6753.11	0	0	960400	3766.71	1666.9	0	0	114316	0	7.64056e+07			808.585
0	PC(18:1/20:4)+HCOO	PC(38:5)+HCOO	PC	(18:1/20:4)	(18:1)	(20:4)			852.576	C47 H83 O10 N1 P1	0	0	0	0	0	0	0	0	0	0	0	0	0	0	0	0	0	0	0	0	0	0	0	90819.5	0	0	0	0	0	0	0	0	0	1.2663e+07	0	0
0	PC(38:5)+H	PC(38:5)+H	PC	(38:5)	(38:5)				808.585	C46 H83 O8 N1 P1	0	151405	75670.9	0	21976.2	0	0	0	31910.3	38982.5	17205.5	9.16556e+06	0	990249	0	34140.4	43600.8	42879	0	242518	35218.6	0	0	0	0	0	85112.2	0	0	154249	0	46280.5	0	1.10175e+06	0	0		808.585	808.585
0	PC(16:0/22:6)+HCOO	PC(38:6)+HCOO	PC	(16:0/22:6)	(16:0)	(22:6)			850.56	C47 H81 O10 N1 P1	0	0	0	0	0	0	0	0	0	0	0	0	0	0	0	0	0	0	0	0	0	0	0	0	0	0	235318	0	1.35061e+06	0	2.9733e+06	0	0	0	0	0
0	PC(38:6)+H	PC(38:6)+H	PC	(16:0/22:6)	(16:0)	(22:6)			806.569	C46 H81 O8 N1 P1	0	0	0	38759.9	0	0	0	0	0	0	0	0	0	47033	0	0	230965	0	0	0	0	0	0	0	0	0	9.07405e+06	0	2.16281e+07	0	3.29813e+07	0	0	0	0	0
0	PC(16:0/22:6)+HCOO	PC(38:6)+HCOO	PC	(16:0/22:6)	(16:0)	(22:6)			850.56	C47 H81 O10 N1 P1	0	0	0	0	0	0	0	0	0	0	0	0	0	0	0	0	0	0	1.068e+06	0	966931	0	90970.7	0	2.00267e+06	0	0	0	26696.8	0	0	0	0	0	1905.02	0
0	PC(38:6)+H	PC(38:6)+H	PC	(16:0/22:6)	(16:0)	(22:6)			806.569	C46 H81 O8 N1 P1	427193	0	0	0	1.06983e+06	0	3.6541e+06	0	0	0	0	0	2.32423e+06	0	0	0	0	0	5.44089e+06	0	1.49362e+06	0	812910	0	9.00043e+06	0	0	0	0	0	0	0	2.14602e+06	0	4.45365e+07	0
0	PC(18:2/20:4)+HCOO	PC(38:6)+HCOO	PC	(18:2/20:4)	(18:2)	(20:4)			850.56	C47 H81 O10 N1 P1	1.36183e+07	0	1.82313e+06	0	16770.7	0	1.53591e+06	0	8.67619e+06	0	1.73539e+08	0	5.2028e+06	0	0	2.43031e+06	0	2.84676e+06	0	0	0	0	0	0	0	0	9939.41	0	0	60353.2	0	325954	0	0	0	0	850.56		850.561
0	PC(38:6)+H	PC(38:6)+H	PC	(18:2/20:4)	(18:2)	(20:4)			806.569	C46 H81 O8 N1 P1	1.09217e+08	1.57959e+06	2.19438e+09	4.00667e+06	1.61356e+07	0	2.02081e+09	0	6.65304e+07	0	2.09681e+09	0	3.92236e+07	0	0	3.82962e+07	0	2.31702e+07	0	0	0	0	62428.6	0	0	0	0	1.9622e+06	0	917797	0	4.58872e+06	0	0	0	0	806.568	806.569	806.568
0	PC(16:0/22:6)+HCOO	PC(38:6)+HCOO	PC	(16:0/22:6)	(16:0)	(22:6)			850.56	C47 H81 O10 N1 P1	0	0	0	0	0	0	0	0	0	0	0	0	0	0	0	0	0	0	0	0	0	0	0	0	0	0	0	0	0	1.50457e+06	0	5.62142e+07	0	0	0	0
0	PC(38:6)+H	PC(38:6)+H	PC	(16:0/22:6)	(16:0)	(22:6)			806.569	C46 H81 O8 N1 P1	0	0	52311.9	0	6.04953e+06	0	8.6558e+06	0	0	0	7.19322e+06	0	0	0	16088.3	0	83617.6	4.16355e+07	0	0	0	0	0	0	17009.6	1741.93	0	0	0	2.1893e+07	0	6.03507e+08	0	0	0	0			806.569
0	PC(16:0/22:6)+HCOO	PC(38:6)+HCOO	PC	(16:0/22:6)	(16:0)	(22:6)			850.56	C47 H81 O10 N1 P1	1436.68	0	0	0	1197.51	0	0	0	0	0	888.678	0	0	0	0	0	0	4549.38	0	0	0	0	0	0	0	0	0	0	0	2.63257e+08	0	0	0	0	0	0	850.56
0	PC(38:6)+H	PC(38:6)+H	PC	(16:0/22:6)	(16:0)	(22:6)			806.569	C46 H81 O8 N1 P1	0	0	6706.46	0	3336.44	0	4195.26	0	0	0	0	0	0	0	0	0	0	352994	0	0	0	0	0	0	0	0	0	0	4.58443e+06	4.65015e+09	340074	15727.2	0	0	0	0			806.569
0	PC(16:0/22:6)+HCOO	PC(38:6)+HCOO	PC	(16:0/22:6)	(16:0)	(22:6)			850.56	C47 H81 O10 N1 P1	0	0	0	0	0	0	0	0	0	0	0	0	0	0	0	0	0	0	0	0	0	0	0	0	0	443475	0	1.28795e+07	0	9.93006e+06	0	0	0	0	0	0
0	PC(38:6)+H	PC(38:6)+H	PC	(16:0/22:6)	(16:0)	(22:6)			806.569	C46 H81 O8 N1 P1	0	0	0	0	0	0	0	0	0	0	0	0	0	0	0	0	0	163305	569422	0	219090	0	99580.6	0	262822	5.84433e+06	2.67551e+06	1.98559e+08	0	0	0	0	0	0	0	0
0	PC(16:0/22:6)+HCOO	PC(38:6)+HCOO	PC	(16:0/22:6)	(16:0)	(22:6)			850.56	C47 H81 O10 N1 P1	0	0	0	0	0	0	0	0	0	0	0	0	0	0	0	0	0	0	0	0	0	0	0	0	0	1.56565e+08	0	0	0	0	0	0	0	0	0	0
0	PC(38:6)+H	PC(38:6)+H	PC	(16:0/22:6)	(16:0)	(22:6)			806.569	C46 H81 O8 N1 P1	0	0	0	0	0	0	0	0	0	0	0	0	0	0	0	0	0	0	0	0	0	0	0	351969	0	2.78843e+09	0	0	0	0	0	0	92592.6	0	0	0
0	PC(16:0/22:6)+HCOO	PC(38:6)+HCOO	PC	(16:0/22:6)	(16:0)	(22:6)			850.56	C47 H81 O10 N1 P1	0	0	0	0	0	0	0	0	0	0	0	0	0	0	0	0	0	0	0	8.84492e+07	0	1.26109e+08	0	2.21048e+08	0	274750	0	298522	0	0	0	0	0	0	0	0
0	PC(38:6)+H	PC(38:6)+H	PC	(16:0/22:6)	(16:0)	(22:6)			806.569	C46 H81 O8 N1 P1	0	0	0	0	0	0	0	0	0	0	0	0	0	0	0	0	0	0	0	1.41722e+09	0	2.19939e+09	0	3.99066e+09	0	2.29081e+06	0	0	0	0	0	0	0	0	0	931288
0	PC(16:0/22:6)+HCOO	PC(38:6)+HCOO	PC	(16:0/22:6)	(16:0)	(22:6)			850.56	C47 H81 O10 N1 P1	0	0	0	0	0	0	0	0	0	0	0	0	0	0	0	0	0	0	0	0	0	52958.7	0	670454	0	0	0	0	0	0	0	0	0	2826.83	0	1.51433e+07
0	PC(38:6)+H	PC(38:6)+H	PC	(16:0/22:6)	(16:0)	(22:6)			806.569	C46 H81 O8 N1 P1	0	0	0	0	0	0	157589	0	0	0	0	0	0	0	0	0	0	0	0	1.2937e+06	0	3.44117e+06	0	1.98872e+06	0	3.18023e+06	0	0	0	0	0	0	0	2.34972e+06	0	2.45549e+08
0	PC(16:0/22:6)+HCOO	PC(38:6)+HCOO	PC	(16:0/22:6)	(16:0)	(22:6)			850.56	C47 H81 O10 N1 P1	0	0	0	0	0	0	0	0	0	0	0	0	0	0	0	0	0	0	0	3749.75	0	0	0	0	0	0	0	0	0	0	0	0	0	5.95653e+07	0	0
0	PC(38:6)+H	PC(38:6)+H	PC	(16:0/22:6)	(16:0)	(22:6)			806.569	C46 H81 O8 N1 P1	0	0	0	0	0	0	0	0	0	0	0	24449.1	0	0	0	0	0	0	0	4506.67	0	0	0	0	0	0	0	0	0	0	0	0	0	1.08282e+08	0	0
0	PC(38:6)+H	PC(38:6)+H	PC	(38:6)	(38:6)				806.569	C46 H81 O8 N1 P1	0	0	78655.3	0	0	0	1803.13	0	0	0	0	5.76699e+06	0	702766	0	0	0	0	0	0	0	0	0	0	0	0	0	0	0	0	0	0	0	0	0	0			806.569
0	PC(38:6)+H	PC(38:6)+H	PC	(38:6)	(38:6)				806.569	C46 H81 O8 N1 P1	0	0	0	0	0	0	0	35931.3	0	2.7654e+06	0	0	0	0	0	0	0	0	0	0	21631.9	0	0	0	0	0	0	0	175739	0	0	0	0	25109.6	0	0
0	PC(38:6e)+H	PC(38:6e)+H	PC	(38:6e)	(38:6e)				792.59	C46 H83 O7 N1 P1	0	0	374899	22633.6	94261.5	0	84682.8	0	0	0	136005	0	0	0	0	0	0	280816	0	0	0	0	530787	0	256725	2.12695e+07	0	79352.5	0	449463	0	196235	0	0	0	0			792.59
0	PC(38:6e)+H	PC(38:6e)+H	PC	(38:6e)	(38:6e)				792.59	C46 H83 O7 N1 P1	0	0	147480	39527.7	112133	0	2902.11	0	0	0	135908	0	0	0	0	182510	444735	162618	0	178688	0	2.72557e+07	0	4.12402e+07	12662.6	45528.2	0	211804	0	436934	0	98998.1	0	0	0	0			792.59
0	PC(38:6p)+H	PC(38:6p)+H	PC	(38:6p)	(38:6p)				790.575	C46 H81 O7 N1 P1	153308	0	8.20935e+07	49728.6	6.74797e+07	481262	7.27657e+07	415995	1.23893e+06	255740	6.77136e+07	0	0	0	0	1212.8	86642	1.05861e+08	0	661.478	0	259016	0	0	0	0	0	0	0	0	0	0	0	0	17508.2	0	790.575		790.573
0	PC(38:6p)+H	PC(38:6p)+H	PC	(38:6p)	(38:6p)				790.575	C46 H81 O7 N1 P1	0	1547.8	0	0	0	0	0	1409.69	0	0	0	0	0	0	0	0	161043	171507	0	0	0	135366	0	0	0	0	0	0	17313.7	0	0	1.9939e+07	0	14340.6	0	1221.2		790.575
0	PC(38:6p)+H	PC(38:6p)+H	PC	(38:6p)	(38:6p)				790.575	C46 H81 O7 N1 P1	506134	778110	5.70569e+06	0	3.80219e+07	0	4.87587e+07	0	52182.5	0	5.44898e+07	0	4232.29	10221.5	0	0	0	115161	0	1600.81	0	0	0	0	0	0	0	0	0	5.75437e+07	0	0	0	0	0	0	790.575	790.575
0	PC(38:6p)+H	PC(38:6p)+H	PC	(38:6p)	(38:6p)				790.575	C46 H81 O7 N1 P1	0	0	0	0	0	0	86245.3	0	0	0	0	0	0	32873.5	0	0	0	0	1516.55	2176.83	28199.5	88447.6	95513.5	0	31013.1	3.77002e+07	4396.83	0	0	427905	0	0	0	0	0	0
0	PC(38:6p)+H	PC(38:6p)+H	PC	(38:6p)	(38:6p)				790.575	C46 H81 O7 N1 P1	0	0	0	0	0	0	0	0	0	0	0	22296.7	0	21454.3	0	0	0	0	84208.7	1.56741e+07	0	2.31545e+07	316878	5.75916e+07	0	2.79807e+07	0	522712	0	665363	0	0	1.14117e+06	0	0	0
0	PC(38:6p)+H	PC(38:6p)+H	PC	(38:6p)	(38:6p)				790.575	C46 H81 O7 N1 P1	0	0	53924.9	0	0	0	0	0	0	0	0	0	0	0	0	0	0	0	0	7.3626e+06	0	6.97288e+06	0	988568	0	940228	0	0	0	211281	0	0	0	2.71293e+06	0	3002.85			790.575
0	PC(16:1/22:6)+HCOO	PC(38:7)+HCOO	PC	(16:1/22:6)	(16:1)	(22:6)			848.545	C47 H79 O10 N1 P1	0	0	317501	0	990168	0	100063	0	0	0	1.05974e+06	0	0	0	0	0	0	0	0	0	0	0	0	0	0	0	0	0	0	0	0	0	0	0	0	0			848.545
0	PC(38:7)+H	PC(38:7)+H	PC	(16:1/22:6)	(16:1)	(22:6)			804.554	C46 H79 O8 N1 P1	167593	0	8.68386e+06	0	9.01855e+06	0	9.99414e+06	0	96654.2	0	1.07381e+07	0	0	0	0	0	0	1.29863e+07	0	0	0	99518.4	0	178388	0	264316	0	1.44855e+06	0	0	0	0	0	0	0	0	804.554		804.553
0	PC(38:7)+H	PC(38:7)+H	PC	(38:7)	(38:7)				804.554	C46 H79 O8 N1 P1	0	0	436393	0	0	0	74.588	0	0	0	103490	0	0	0	0	0	0	3.73911e+06	0	0	0	0	0	0	0	8.71681e+06	0	4325.98	0	0	0	3.8792e+06	0	0	0	0
0	PC(38:7)+H	PC(38:7)+H	PC	(38:7)	(38:7)				804.554	C46 H79 O8 N1 P1	8.54493e+06	0	1.21999e+08	0	1.29421e+08	0	1.59627e+08	0	2635.05	0	1.26438e+08	0	6360.45	0	682009	375356	0	9.33223e+07	0	0	0	371070	0	2.38966e+06	0	224546	0	0	0	1.38929e+07	0	5069.37	0	0	0	0	804.55		804.554
0	PC(38:7)+H	PC(38:7)+H	PC	(38:7)	(38:7)				804.554	C46 H79 O8 N1 P1	0	0	0	0	0	0	0	0	0	0	0	0	0	0	402.937	0	0	0	0	0	0	0	0	0	0	1.37456e+07	0	0	0	0	931.753	0	0	196767	0	0
0	PC(38:7)+H	PC(38:7)+H	PC	(38:7)	(38:7)				804.554	C46 H79 O8 N1 P1	0	0	0	0	0	0	0	50500.8	0	0	0	182076	0	94450.2	0	0	0	0	0	52925.2	0	1.37191e+06	0	1.06456e+07	0	5127.03	0	1.07344e+07	0	0	0	0	0	0	0	0
0	PC(38:7)+H	PC(38:7)+H	PC	(38:7)	(38:7)				804.554	C46 H79 O8 N1 P1	0	795554	0	180645	0	0	0	0	0	0	0	0	0	0	0	0	497336	0	0	7.68954e+07	0	9.63392e+07	0	1.44088e+08	0	383932	0	0	0	0	0	0	0	9626.35	0	0		804.554
0	PC(38:7)+H	PC(38:7)+H	PC	(38:7)	(38:7)				804.554	C46 H79 O8 N1 P1	0	0	0	0	0	0	0	0	0	0	0	0	0	0	0	0	0	0	0	0	0	0	0	0	0	0	0	346853	286765	0	0	0	0	15720.6	0	1.40781e+07
0	PC(16:0/23:1)+H	PC(39:1)+H	PC	(16:0/23:1)	(16:0)	(23:1)			830.663	C47 H93 O8 N1 P1	0	0	2.88963e+06	0	1.81495e+07	33481	1.48123e+07	0	0	0	1.13114e+07	0	0	0	0	0	0	4.47386e+06	0	0	0	0	0	0	0	0	0	0	0	2.1224e+06	0	48303.9	0	0	0	0			830.663
0	PC(16:0/23:1)+H	PC(39:1)+H	PC	(16:0/23:1)	(16:0)	(23:1)			830.663	C47 H93 O8 N1 P1	0	0	0	0	0	0	0	0	0	0	0	65030.2	0	0	0	0	0	0	0	0	0	0	0	0	0	0	0	0	0	6.36033e+07	0	0	0	0	0	0
0	PC(16:0/23:1)+H	PC(39:1)+H	PC	(16:0/23:1)	(16:0)	(23:1)			830.663	C47 H93 O8 N1 P1	0	0	0	0	0	0	0	0	0	0	0	0	0	0	0	0	61386.4	0	71101.8	537983	0	2.71357e+07	0	3.20649e+07	0	1.53876e+07	0	0	0	0	0	0	0	0	0	0
0	PC(39:4)+H	PC(39:4)+H	PC	(39:4)	(39:4)				824.616	C47 H87 O8 N1 P1	0	0	0	0	0	0	2557.87	0	0	0	0	0	0	0	0	0	0	7.29452e+06	0	0	0	0	0	0	0	0	0	0	0	107318	0	0	0	0	0	0
0	PC(39:4)+H	PC(39:4)+H	PC	(39:4)	(39:4)				824.616	C47 H87 O8 N1 P1	0	0	0	0	0	0	0	0	0	0	0	0	0	0	0	0	0	1.30442e+06	0	0	0	0	0	0	0	0	0	0	0	1.03698e+07	0	0	0	0	0	0
0	PC(17:0/22:6)+HCOO	PC(39:6)+HCOO	PC	(17:0/22:6)	(17:0)	(22:6)			864.576	C48 H83 O10 N1 P1	0	0	964963	0	95070	0	0	0	0	0	0	0	0	0	0	0	0	1.47579e+06	0	0	229.847	0	0	0	0	0	0	0	0	0	0	0	0	0	0	0			864.577
0	PC(39:6)+H	PC(39:6)+H	PC	(17:0/22:6)	(17:0)	(22:6)			820.585	C47 H83 O8 N1 P1	0	1853.31	9.9926e+06	59909.1	9.94649e+06	0	0	0	0	0	9.60674e+06	0	0	0	0	0	0	1.34866e+07	0	0	0	0	0	0	0	0	0	0	0	0	0	0	0	0	0	0		820.585	820.583
0	PC(39:6)+H	PC(39:6)+H	PC	(39:6)	(39:6)				820.585	C47 H83 O8 N1 P1	0	0	804146	0	1811.33	0	0	0	0	0	164949	0	0	0	0	0	0	0	0	0	0	0	0	0	0	0	0	0	0	0	0	8.48707e+06	0	0	0	0			820.585
0	PC(39:6)+H	PC(39:6)+H	PC	(39:6)	(39:6)				820.585	C47 H83 O8 N1 P1	0	0	1.91409e+06	0	2637.78	0	4.11445e+06	0	0	0	3.53806e+06	0	0	0	1127.75	0	0	0	0	0	0	0	0	0	0	0	0	0	0	8.70177e+07	0	0	0	0	0	0
0	PC(39:6)+H	PC(39:6)+H	PC	(39:6)	(39:6)				820.585	C47 H83 O8 N1 P1	0	0	0	0	0	0	0	0	0	0	0	0	0	0	0	0	0	0	53529.2	0	421.606	0	133162	0	0	3.08515e+07	0	0	0	0	0	0	77977.2	0	0	0
0	PC(39:6)+H	PC(39:6)+H	PC	(39:6)	(39:6)				820.585	C47 H83 O8 N1 P1	0	0	0	0	0	0	0	0	0	0	0	0	0	0	0	0	0	0	0	1.05287e+07	0	2.07508e+07	0	3.65123e+07	0	3.3625e+06	0	124048	0	135876	0	0	0	0	0	0
0	PC(39:6)+H	PC(39:6)+H	PC	(39:6)	(39:6)				820.585	C47 H83 O8 N1 P1	0	0	0	0	0	0	0	0	0	0	0	0	0	0	0	0	0	0	0	0	0	0	0	0	0	143992	0	0	0	0	0	0	0	2.00719e+06	0	0
0	PC(39:7)+H	PC(39:7)+H	PC	(39:7)	(39:7)				818.569	C47 H81 O8 N1 P1	0	0	0	0	0	0	0	0	0	0	0	0	0	0	0	0	0	0	0	1.19081e+07	0	0	0	0	0	26402.3	0	0	0	0	0	0	0	0	0	0
0	PC(40:0)+H	PC(40:0)+H	PC	(40:0)	(40:0)				846.695	C48 H97 O8 N1 P1	0	0	1.27903e+07	0	1.07956e+07	0	1.1579e+07	0	0	0	9.96383e+06	0	0	0	45325.9	0	0	2.40432e+07	0	0	0	0	0	0	0	2805.72	0	0	0	0	0	0	0	0	0	0			846.694
0	PC(16:0/24:0)+HCOO	PC(40:0)+HCOO	PC	(16:0/24:0)	(16:0)	(24:0)			890.686	C49 H97 O10 N1 P1	0	0	0	0	0	0	0	0	0	0	0	0	0	0	0	0	0	0	0	0	0	0	0	0	0	0	0	0	0	4.26579e+06	0	0	0	0	0	0
0	PC(40:0)+H	PC(40:0)+H	PC	(16:0/24:0)	(16:0)	(24:0)			846.695	C48 H97 O8 N1 P1	0	0	0	0	0	0	0	0	0	0	0	0	0	0	0	0	0	0	0	0	0	2811.73	0	3116.85	0	0	0	410.622	0	5.54321e+07	0	0	0	0	0	0
0	PC(40:0)+H	PC(40:0)+H	PC	(40:0)	(40:0)				846.695	C48 H97 O8 N1 P1	0	0	0	0	0	0	0	0	0	0	0	0	0	0	0	0	0	0	0	4.20599e+06	0	1.86984e+07	0	4.50688e+07	0	1.30919e+07	0	0	0	0	0	0	0	0	0	28134
0	PC(18:1/22:0)+HCOO	PC(40:1)+HCOO	PC	(18:1/22:0)	(18:1)	(22:0)			888.67	C49 H95 O10 N1 P1	611391	0	1.06269e+07	0	9.84336e+06	0	1.1522e+07	0	0	0	1.04504e+07	0	0	0	0	0	0	1.38605e+07	0	0	0	0	0	0	0	0	0	0	0	2.61924e+06	0	2.1787e+06	0	0	0	0	888.67		888.671
0	PC(40:1)+H	PC(40:1)+H	PC	(18:1/22:0)	(18:1)	(22:0)			844.679	C48 H95 O8 N1 P1	4.4897e+06	0	1.50601e+08	0	1.47346e+08	0	1.2766e+08	0	1.24078e+06	0	1.15447e+08	0	2824.31	0	0	0	0	2.22289e+08	0	0	0	0	0	0	0	234215	65210.1	0	0	0	0	591898	0	0	0	0	844.677		844.678
0	PC(18:1/22:0)+HCOO	PC(40:1)+HCOO	PC	(18:1/22:0)	(18:1)	(22:0)			888.67	C49 H95 O10 N1 P1	0	0	0	0	0	0	0	0	0	0	0	0	0	0	0	0	0	2023.19	0	0	0	0	0	0	0	0	0	0	0	2.84621e+07	0	1.41168e+06	0	0	0	0
0	PC(40:1)+H	PC(40:1)+H	PC	(18:1/22:0)	(18:1)	(22:0)			844.679	C48 H95 O8 N1 P1	0	0	0	0	0	0	0	0	0	0	0	0	0	0	0	0	0	0	0	0	0	995736	0	976176	0	0	0	0	0	5.79405e+08	0	2.4628e+07	0	0	0	0
0	PC(40:1)+H	PC(40:1)+H	PC	(40:1)	(40:1)				844.679	C48 H95 O8 N1 P1	0	0	0	0	0	0	0	0	0	0	0	0	0	0	0	0	0	0	0	0	0	3281.88	0	0	0	13113.4	0	1.61337e+07	0	0	0	0	0	0	0	1009.53
0	PC(18:1/22:0)+HCOO	PC(40:1)+HCOO	PC	(18:1/22:0)	(18:1)	(22:0)			888.67	C49 H95 O10 N1 P1	0	0	0	0	0	0	0	0	0	0	0	0	0	0	0	0	0	0	0	572483	0	6.19485e+06	0	364547	0	1.28425e+07	0	0	0	0	0	0	0	0	34108	0
0	PC(40:1)+H	PC(40:1)+H	PC	(18:1/22:0)	(18:1)	(22:0)			844.679	C48 H95 O8 N1 P1	0	0	0	0	0	0	0	0	0	0	0	39708.3	0	0	0	0	0	0	0	4.30159e+06	0	2.12267e+08	0	3.59266e+08	0	1.52934e+08	0	0	0	0	0	0	0	0	0	0
0	PC(40:1)+H	PC(40:1)+H	PC	(40:1)	(40:1)				844.679	C48 H95 O8 N1 P1	0	0	0	0	0	0	0	0	0	0	0	0	0	0	0	0	0	0	0	8.32341e+07	0	6.16012e+06	0	1.82505e+06	0	0	0	0	0	0	0	0	0	0	0	10763.2
0	PC(18:1/22:1)+HCOO	PC(40:2)+HCOO	PC	(18:1/22:1)	(18:1)	(22:1)			886.654	C49 H93 O10 N1 P1	0	0	4.40261e+06	0	5.88713e+06	0	6.20326e+06	0	0	0	6.49911e+06	0	0	0	0	0	0	7.33829e+06	0	0	0	0	0	0	0	0	0	0	0	0	0	0	0	0	0	0			886.654
0	PC(40:2)+H	PC(40:2)+H	PC	(18:1/22:1)	(18:1)	(22:1)			842.663	C48 H93 O8 N1 P1	2.85151e+06	0	6.38962e+07	0	7.48394e+07	0	6.92368e+07	0	137265	0	5.47215e+07	0	153881	0	0	0	0	1.07378e+08	0	0	0	0	0	0	0	0	0	4.88727e+06	0	0	0	0	0	0	0	0	842.663		842.662
0	PC(40:2)+H	PC(40:2)+H	PC	(40:2)	(40:2)				842.663	C48 H93 O8 N1 P1	0	0	0	0	0	0	0	0	0	0	0	0	0	0	0	0	0	0	0	0	0	0	0	0	0	2.62001e+06	0	0	0	0	0	1.14351e+07	0	0	0	0
0	PC(18:1/22:1)+HCOO	PC(40:2)+HCOO	PC	(18:1/22:1)	(18:1)	(22:1)			886.654	C49 H93 O10 N1 P1	0	0	0	0	0	0	0	0	0	0	0	0	0	0	0	0	0	0	0	0	0	0	0	0	0	0	0	0	0	1.36988e+07	0	0	0	0	0	0
0	PC(40:2)+H	PC(40:2)+H	PC	(18:1/22:1)	(18:1)	(22:1)			842.663	C48 H93 O8 N1 P1	0	0	0	0	0	0	0	0	4285.61	0	0	0	0	0	0	0	0	5479.27	0	0	0	0	0	0	0	74091.6	0	0	0	3.0779e+08	0	0	0	0	0	0
0	PC(40:2)+H	PC(40:2)+H	PC	(40:2)	(40:2)				842.663	C48 H93 O8 N1 P1	0	0	0	0	0	0	0	0	0	0	0	0	0	0	0	0	0	0	0	0	0	0	0	0	0	0	0	5.88777e+06	0	0	0	0	0	0	0	1.19404e+06
0	PC(18:1/22:1)+HCOO	PC(40:2)+HCOO	PC	(18:1/22:1)	(18:1)	(22:1)			886.654	C49 H93 O10 N1 P1	0	0	0	0	0	0	0	0	0	0	0	0	0	0	0	0	0	0	0	0	0	6.93015e+06	0	9.45854e+06	0	4.77606e+06	0	0	0	0	0	0	0	0	0	0
0	PC(40:2)+H	PC(40:2)+H	PC	(18:1/22:1)	(18:1)	(22:1)			842.663	C48 H93 O8 N1 P1	0	0	0	0	0	0	0	0	0	0	0	0	0	0	0	0	0	0	0	0	0	1.65599e+08	0	2.31507e+08	0	9.23985e+07	0	0	0	0	0	0	0	1.73045e+06	0	0
0	PC(40:2)+H	PC(40:2)+H	PC	(40:2)	(40:2)				842.663	C48 H93 O8 N1 P1	0	0	0	0	0	0	0	0	0	0	0	1545	0	0	0	0	0	0	0	5.4811e+07	0	349994	0	3525.15	0	0	0	0	0	0	0	0	0	0	0	9099.95
0	PC(16:1p/24:2)+H	PC(40:3p)+H	PC	(16:1p/24:2)	(16:1p)	(24:2)			824.653	C48 H91 O7 N1 P1	127009	0	2.28466e+07	0	1.3887e+07	0	1.8223e+07	0	0	0	5.45632e+06	0	0	0	0	0	0	1.10307e+07	0	0	0	1.70069e+06	0	2.45692e+06	0	0	0	0	315642	0	0	0	0	0	0	0	824.653		824.659
0	PC(40:3p)+H	PC(40:3p)+H	PC	(40:3p)	(40:3p)				824.653	C48 H91 O7 N1 P1	0	0	0	0	0	0	0	0	0	0	0	0	0	0	0	0	0	0	0	0	0	4.57567e+07	0	6.14381e+07	0	5.25401e+06	0	0	0	0	0	0	0	0	0	0
0	PC(40:4)+H	PC(40:4)+H	PC	(40:4)	(40:4)				838.632	C48 H89 O8 N1 P1	0	783980	0	278595	0	0	0	0	0	0	0	0	0	0	6.67739e+06	0	1.40262e+06	0	0	0	0	0	0	0	0	0	0	0	0	0	0	0	0	0	0	0		838.632
0	PC(40:4)+H	PC(40:4)+H	PC	(40:4)	(40:4)				838.632	C48 H89 O8 N1 P1	0	0	0	0	0	0	0	0	0	0	0	0	0	0	0	0	0	0	0	0	0	0	0	0	0	0	53133.3	0	7.28542e+06	0	6.25071e+06	0	0	0	0	0
0	PC(18:0/22:4)+HCOO	PC(40:4)+HCOO	PC	(18:0/22:4)	(18:0)	(22:4)			882.623	C49 H89 O10 N1 P1	1.08436e+06	0	2.19878e+07	0	1.91855e+07	0	2.16387e+07	0	304972	0	1.94784e+07	0	0	0	0	365202	0	3.39753e+07	0	0	0	0	0	0	0	0	0	0	0	0	0	0	0	0	0	0	882.625		882.624
0	PC(18:0/22:4)+H	PC(40:4)+H	PC	(18:0/22:4)	(18:0)	(22:4)			838.632	C48 H89 O8 N1 P1	1.06711e+07	0	3.6967e+08	0	1.35691e+07	0	3.06617e+08	0	4.05742e+06	0	2.75486e+08	104767	1.92841e+06	0	25394.3	3.02886e+06	0	5.70518e+07	0	0	0	0	0	0	0	0	0	0	0	4.05232e+06	0	2.92369e+06	0	0	0	0	838.632		838.631
0	PC(18:0/22:4)+H	PC(40:4)+H	PC	(18:0/22:4)	(18:0)	(22:4)			838.632	C48 H89 O8 N1 P1	281772	0	4.08009e+06	0	6.10328e+06	0	3.54302e+06	0	0	0	3.2209e+06	0	0	0	0	0	0	3.93043e+06	0	0	0	0	0	0	0	0	0	0	0	4.01449e+06	0	7.91194e+07	0	0	0	0	838.632		838.632
0	PC(18:0/22:4)+HCOO	PC(40:4)+HCOO	PC	(18:0/22:4)	(18:0)	(22:4)			882.623	C49 H89 O10 N1 P1	0	0	1.65746e+06	0	1.07328e+06	0	2429.98	0	0	0	1.44401e+06	0	0	0	0	0	0	0	0	0	0	0	0	0	0	0	0	0	0	0	0	6.74372e+06	0	0	0	0			882.623
0	PC(18:0/22:4)+HCOO	PC(40:4)+HCOO	PC	(18:0/22:4)	(18:0)	(22:4)			882.623	C49 H89 O10 N1 P1	0	0	0	0	0	0	0	0	0	0	0	0	0	0	0	0	0	0	0	0	0	0	0	0	0	0	0	0	0	2.67692e+07	0	0	0	0	0	0
0	PC(40:4)+H	PC(40:4)+H	PC	(40:4)	(40:4)				838.632	C48 H89 O8 N1 P1	0	0	0	0	0	0	0	0	0	0	0	0	0	0	0	0	0	0	0	0	0	141892	0	176191	0	1.42633e+06	0	2.34621e+07	0	7533.5	0	0	0	0	0	0
0	PC(18:0/22:4)+HCOO	PC(40:4)+HCOO	PC	(18:0/22:4)	(18:0)	(22:4)			882.623	C49 H89 O10 N1 P1	0	0	0	0	0	0	0	0	0	0	0	0	0	0	0	0	0	0	0	0	0	0	0	171543	0	2.02647e+07	0	0	0	0	0	0	0	0	0	0
0	PC(40:4)+H	PC(40:4)+H	PC	(18:0/22:4)	(18:0)	(22:4)			838.632	C48 H89 O8 N1 P1	0	82853.1	0	0	0	0	0	0	0	0	0	0	0	0	70710.6	0	26780.2	0	0	0	0	2.94803e+06	0	9.66007e+06	0	4.48687e+08	0	349146	0	0	512729	0	0	0	0	0		838.632
0	PC(18:0/22:4)+HCOO	PC(40:4)+HCOO	PC	(18:0/22:4)	(18:0)	(22:4)			882.623	C49 H89 O10 N1 P1	0	0	0	0	0	0	0	0	0	0	0	0	0	0	0	0	0	0	0	1.17437e+07	0	1.37195e+07	0	2.03119e+07	0	0	0	0	0	0	0	0	0	0	25797.6	0
0	PC(40:4)+H	PC(40:4)+H	PC	(18:0/22:4)	(18:0)	(22:4)			838.632	C48 H89 O8 N1 P1	0	0	0	0	0	0	0	57851.5	0	0	0	0	0	0	0	0	0	0	0	2.72576e+08	0	3.63238e+08	0	6.788e+08	0	2.28979e+06	97041.4	0	0	0	0	0	0	0	0	149018
0	PC(18:0/22:4)+HCOO	PC(40:4)+HCOO	PC	(18:0/22:4)	(18:0)	(22:4)			882.623	C49 H89 O10 N1 P1	0	0	0	0	0	0	0	0	0	0	0	0	0	0	0	0	0	0	0	0	0	0	0	0	0	0	0	0	0	0	0	0	0	0	0	1.97734e+06
0	PC(40:4)+H	PC(40:4)+H	PC	(18:0/22:4)	(18:0)	(22:4)			838.632	C48 H89 O8 N1 P1	0	0	1148.66	0	0	0	0	0	0	0	0	0	0	0	0	0	0	0	0	2.59915e+06	0	0	0	0	0	0	0	0	0	0	0	0	0	0	96992.8	4.12801e+07			838.632
0	PC(18:0/22:4)+HCOO	PC(40:4)+HCOO	PC	(18:0/22:4)	(18:0)	(22:4)			882.623	C49 H89 O10 N1 P1	0	0	0	0	0	0	0	0	0	0	0	0	0	0	0	0	0	0	0	0	0	0	0	0	0	0	0	0	0	0	0	0	0	311131	0	0
0	PC(40:4)+H	PC(40:4)+H	PC	(18:0/22:4)	(18:0)	(22:4)			838.632	C48 H89 O8 N1 P1	0	0	0	0	0	0	0	0	0	0	0	0	0	0	0	0	0	0	0	0	0	0	0	0	0	0	0	0	0	0	0	0	0	1.20121e+08	0	0
0	PC(18:0/22:5)+H	PC(40:5)+H	PC	(18:0/22:5)	(18:0)	(22:5)			836.616	C48 H87 O8 N1 P1	6.18471e+06	0	1.91032e+08	0	6.94086e+07	0	6.65974e+07	0	4.02466e+06	0	1.66983e+08	0	407748	0	111896	2.09445e+06	0	3.24434e+08	0	294634	0	5.28516e+06	351116	7.15311e+06	0	0	0	422001	140298	188261	89197.2	290757	0	0	0	0	836.616		836.615
0	PC(18:0/22:5)+HCOO	PC(40:5)+HCOO	PC	(18:0/22:5)	(18:0)	(22:5)			880.607	C49 H87 O10 N1 P1	994385	0	1.84508e+07	0	1.28289e+07	0	7.99325e+06	0	481386	0	3.71189e+06	0	0	0	0	0	0	2.49045e+07	0	0	0	0	0	0	0	0	0	0	0	0	0	0	0	0	0	0	880.607		880.607
0	PC(40:5)+H	PC(40:5)+H	PC	(40:5)	(40:5)				836.616	C48 H87 O8 N1 P1	238754	0	1.99711e+07	0	1.89084e+07	0	1.80641e+07	0	0	53081.9	1.69861e+07	0	0	0	0	0	0	5.00335e+07	165321	1.13796e+06	389907	0	14415.6	0	331842	0	62861.4	0	167299	785326	0	5.00148e+07	0	0	327615	923420	836.616		836.616
0	PC(40:5)+HCOO	PC(40:5)+HCOO	PC	(40:5)	(40:5)				880.607	C49 H87 O10 N1 P1	0	0	3.08515e+06	0	978208	0	2872.95	0	0	0	14257.2	0	0	0	0	0	0	692443	0	0	0	0	0	0	0	0	0	0	0	0	0	1.83963e+06	0	0	0	0			880.607
0	PC(18:0/22:5)+H	PC(40:5)+H	PC	(18:0/22:5)	(18:0)	(22:5)			836.616	C48 H87 O8 N1 P1	1617.41	0	4.06662e+06	0	1.66145e+06	0	5006.53	0	0	0	14402.2	0	0	0	0	0	0	1.02593e+07	0	0	0	0	0	26476.7	0	0	0	0	11336.4	1.63967e+08	0	3.9159e+06	82121.9	257257	0	0	836.616		836.616
0	PC(18:0/22:5)+H	PC(40:5)+H	PC	(18:0/22:5)	(18:0)	(22:5)			836.616	C48 H87 O8 N1 P1	0	0	0	0	0	0	0	58021.4	0	0	0	0	0	0	0	0	0	0	0	0	0	25810	349623	0	164124	291456	0	1.16314e+07	0	0	0	0	0	32916.5	0	0
0	PC(18:0/22:5)+H	PC(40:5)+H	PC	(18:0/22:5)	(18:0)	(22:5)			836.616	C48 H87 O8 N1 P1	0	121306	0	57294.8	0	0	0	0	0	52649.8	0	39439.3	0	0	0	0	4.10159e+06	0	0	63371.8	0	1.77851e+06	0	8.04259e+06	0	3.18323e+07	0	448379	0	0	0	0	0	48735.8	0	0		836.616
0	PC(40:5)+HCOO	PC(40:5)+HCOO	PC	(18:0/22:5)	(18:0)	(22:5)			880.607	C49 H87 O10 N1 P1	0	0	0	0	0	0	0	0	0	0	0	0	0	0	0	0	0	0	0	0	0	910.764	0	125636	0	2.47117e+06	0	763535	0	0	0	0	0	0	0	0
0	PC(18:0/22:5)+H	PC(40:5)+H	PC	(18:0/22:5)	(18:0)	(22:5)			836.616	C48 H87 O8 N1 P1	0	0	0	0	0	0	0	0	0	0	0	0	0	0	0	0	0	0	0	1.22128e+08	0	1.99529e+07	0	3.1314e+07	0	0	0	0	0	0	0	0	0	0	0	85004
0	PC(40:5p)+HCOO	PC(40:5p)+HCOO	PC	(40:5p)	(40:5p)				864.612	C49 H87 O9 N1 P1	0	0	1.74226e+06	0	52308.6	0	0	0	0	0	0	0	0	0	0	0	0	0	0	0	0	0	0	0	0	0	0	0	0	0	0	0	0	0	0	0			864.614
0	PC(18:0/22:6)+HCOO	PC(40:6)+HCOO	PC	(18:0/22:6)	(18:0)	(22:6)			878.592	C49 H85 O10 N1 P1	0	0	0	0	0	0	0	0	0	0	0	0	0	0	0	0	0	0	0	0	0	0	0	0	0	0	809245	0	679278	0	2820.29	0	0	0	0	0
0	PC(40:6)+H	PC(40:6)+H	PC	(18:0/22:6)	(18:0)	(22:6)			834.601	C48 H85 O8 N1 P1	0	0	0	0	0	0	0	0	0	0	0	0	0	0	0	0	0	0	0	0	0	0	0	0	0	0	3.72268e+06	0	7.21918e+06	0	149291	0	0	0	0	0
0	PC(40:6)+H	PC(40:6)+H	PC	(40:6)	(40:6)				834.601	C48 H85 O8 N1 P1	0	0	0	0	0	0	0	0	0	0	0	0	0	0	0	0	0	0	2.73599e+07	0	508289	0	47297.8	0	544747	0	76530.4	0	0	0	0	0	305345	0	32677.2	40554.9
0	PC(18:0/22:6)+HCOO	PC(40:6)+HCOO	PC	(18:0/22:6)	(18:0)	(22:6)			878.592	C49 H85 O10 N1 P1	8.21229e+06	0	1.27823e+08	0	1.26109e+08	14712.1	1.21117e+08	0	5.17487e+06	0	1.27726e+08	0	2.7623e+06	0	0	2.30154e+06	29467.5	1.99902e+08	0	0	0	0	0	0	0	0	0	0	0	6.51153e+06	0	0	0	0	0	0	878.593		878.592
0	PC(40:6)+H	PC(40:6)+H	PC	(18:0/22:6)	(18:0)	(22:6)			834.601	C48 H85 O8 N1 P1	6.64832e+07	54003.7	1.56632e+09	399713	1.46378e+09	0	1.38237e+09	41686	4.31497e+07	32204.6	1.34299e+09	0	2.21576e+07	0	0	2.19042e+07	71431.6	2.5605e+09	0	0	0	0	0	0	0	0	0	0	0	6.42494e+07	0	1.6463e+06	0	0	0	60807.8	834.6	834.601	834.6
0	PC(18:0/22:6)+HCOO	PC(40:6)+HCOO	PC	(18:0/22:6)	(18:0)	(22:6)			878.592	C49 H85 O10 N1 P1	0	0	250.437	0	0	0	2238.8	0	0	0	0	0	0	0	0	0	0	335378	0	0	0	0	0	0	0	0	0	0	0	1875.05	0	3.65525e+07	0	0	0	0			878.592
0	PC(18:0/22:6)+HCOO	PC(40:6)+HCOO	PC	(18:0/22:6)	(18:0)	(22:6)			878.592	C49 H85 O10 N1 P1	0	0	1.34022e+07	0	1.87895e+07	0	5.18296e+07	0	0	0	3.19793e+07	0	2623.02	0	0	0	0	2718.91	0	0	0	0	0	0	0	0	0	86180.6	0	1.78493e+08	0	0	0	0	0	0			878.592
0	PC(40:6)+H	PC(40:6)+H	PC	(18:0/22:6)	(18:0)	(22:6)			834.601	C48 H85 O8 N1 P1	0	0	0	0	0	0	0	0	0	0	0	0	0	0	0	0	0	0	0	0	0	0	23759	0	0	0	0	0	0	3.25388e+09	0	842278	0	0	0	0
0	PC(18:0/22:6)+HCOO	PC(40:6)+HCOO	PC	(18:0/22:6)	(18:0)	(22:6)			878.592	C49 H85 O10 N1 P1	0	0	0	0	0	0	0	0	0	0	0	0	0	0	0	0	0	0	0	0	0	0	0	0	0	521507	0	1.01169e+07	0	0	0	0	0	0	0	0
0	PC(40:6)+H	PC(40:6)+H	PC	(18:0/22:6)	(18:0)	(22:6)			834.601	C48 H85 O8 N1 P1	0	0	0	0	0	0	0	0	0	0	0	0	0	0	0	0	0	0	0	0	0	1810.5	42891.1	3361.56	20808.5	2.52844e+06	0	1.33101e+08	0	6561.67	0	0	0	0	0	0
0	PC(18:0/22:6)+HCOO	PC(40:6)+HCOO	PC	(18:0/22:6)	(18:0)	(22:6)			878.592	C49 H85 O10 N1 P1	0	0	0	0	0	0	0	0	0	0	0	0	0	0	0	0	0	0	0	2.03882e+06	0	35134.7	0	3186.98	0	1.18377e+08	0	0	0	0	0	0	0	0	0	0
0	PC(40:6)+H	PC(40:6)+H	PC	(18:0/22:6)	(18:0)	(22:6)			834.601	C48 H85 O8 N1 P1	0	0	0	0	0	0	0	0	0	0	0	0	0	0	0	0	0	0	0	1.42649e+07	21369.1	37046.7	0	1.46191e+06	0	2.66133e+09	468435	0	0	0	0	0	0	0	0	0
0	PC(18:0/22:6)+HCOO	PC(40:6)+HCOO	PC	(18:0/22:6)	(18:0)	(22:6)			878.592	C49 H85 O10 N1 P1	0	0	0	0	0	0	0	0	0	0	0	0	0	23613.8	0	0	0	0	0	5.83162e+07	0	8.97842e+07	0	1.63504e+08	0	2.33558e+07	0	0	0	0	0	0	0	0	0	215766
0	PC(40:6)+H	PC(40:6)+H	PC	(18:0/22:6)	(18:0)	(22:6)			834.601	C48 H85 O8 N1 P1	0	0	0	0	0	0	0	0	0	0	0	0	0	0	0	0	0	0	0	1.83304e+09	0	3.461e+09	0	5.43282e+09	0	950661	0	0	0	0	0	148309	0	74885.4	0	4.04093e+06
0	PC(18:0/22:6)+HCOO	PC(40:6)+HCOO	PC	(18:0/22:6)	(18:0)	(22:6)			878.592	C49 H85 O10 N1 P1	0	0	0	0	0	0	0	0	0	0	0	0	0	0	0	0	0	0	0	5.20024e+06	0	3.1822e+06	0	393669	0	0	0	0	0	0	0	0	0	75105.4	0	1.19998e+07
0	PC(40:6)+H	PC(40:6)+H	PC	(18:0/22:6)	(18:0)	(22:6)			834.601	C48 H85 O8 N1 P1	0	0	0	0	0	0	0	0	0	0	0	0	0	0	0	0	0	0	0	4.028e+06	0	0	0	0	0	0	0	0	0	0	0	0	0	6.30353e+06	0	1.97136e+08
0	PC(18:0/22:6)+HCOO	PC(40:6)+HCOO	PC	(18:0/22:6)	(18:0)	(22:6)			878.592	C49 H85 O10 N1 P1	0	0	0	0	0	0	0	0	0	0	0	0	0	0	0	0	0	0	0	0	0	0	0	0	0	0	0	0	0	0	0	0	0	9.15397e+06	0	44712.6
0	PC(40:6)+H	PC(40:6)+H	PC	(18:0/22:6)	(18:0)	(22:6)			834.601	C48 H85 O8 N1 P1	0	0	0	0	367.503	0	0	0	17014.9	0	0	0	0	0	0	0	0	0	0	0	0	0	0	0	0	0	0	0	0	0	0	0	0	2.00481e+08	0	0
0	PC(40:6p)+H	PC(40:6p)+H	PC	(40:6p)	(40:6p)				818.606	C48 H85 O7 N1 P1	116502	0	2.59902e+06	85910.7	59886.5	0	264214	0	0	0	151548	0	0	0	5403.21	0	0	3.55976e+06	0	0	0	0	0	0	0	0	0	0	0	1.46e+07	0	0	0	0	0	0	818.606		818.606
0	PC(40:7)+H	PC(40:7)+H	PC	(40:7)	(40:7)				832.585	C48 H83 O8 N1 P1	0	0	0	0	0	0	0	0	0	0	0	0	0	0	0	0	0	0	0	0	0	0	0	0	0	0	5.46822e+06	0	8.27894e+06	0	1.02695e+07	0	0	0	0	0
0	PC(18:1/22:6)+HCOO	PC(40:7)+HCOO	PC	(18:1/22:6)	(18:1)	(22:6)			876.576	C49 H83 O10 N1 P1	0	0	0	0	0	0	0	0	0	0	0	0	0	0	0	0	0	0	313475	0	351634	0	26698.2	0	694552	0	0	0	0	0	0	0	0	0	732051	0
0	PC(40:7)+H	PC(40:7)+H	PC	(18:1/22:6)	(18:1)	(22:6)			832.585	C48 H83 O8 N1 P1	695377	0	0	0	0	0	0	0	0	0	0	0	0	0	0	0	0	0	1.69869e+06	0	3.72143e+06	0	93748.2	0	2.44849e+06	0	0	0	0	0	0	0	2.2753e+06	0	6.28163e+06	0
0	PC(18:1/22:6)+HCOO	PC(40:7)+HCOO	PC	(18:1/22:6)	(18:1)	(22:6)			876.576	C49 H83 O10 N1 P1	2.16844e+06	0	4.03578e+07	0	3.73099e+07	0	3.59106e+07	0	1.53891e+06	0	3.72814e+07	0	700237	0	0	1.01847e+06	0	6.25367e+07	0	0	0	0	0	0	0	0	0	0	0	0	0	0	0	0	0	0	876.576		876.578
0	PC(40:7)+H	PC(40:7)+H	PC	(18:1/22:6)	(18:1)	(22:6)			832.585	C48 H83 O8 N1 P1	2.786e+07	0	4.50141e+08	0	4.39562e+08	0	4.15714e+08	0	1.79431e+07	0	3.97594e+08	0	1.0894e+07	0	0	1.09001e+07	0	7.27023e+08	0	520245	0	0	0	15905.8	0	0	0	138784	0	0	0	681230	0	20033.3	0	937414	832.584		832.584
0	PC(18:1/22:6)+HCOO	PC(40:7)+HCOO	PC	(18:1/22:6)	(18:1)	(22:6)			876.576	C49 H83 O10 N1 P1	0	0	0	0	0	0	0	0	0	0	0	0	0	0	0	0	0	0	0	0	0	0	0	0	0	0	0	0	0	0	0	1.1223e+07	0	0	0	0
0	PC(40:7)+H	PC(40:7)+H	PC	(18:1/22:6)	(18:1)	(22:6)			832.585	C48 H83 O8 N1 P1	0	0	9991.1	0	405776	0	967590	0	0	0	384766	0	0	0	0	0	0	8.46823e+06	0	0	0	0	0	0	0	0	0	0	0	0	0	1.26325e+08	0	45486.6	0	0			832.585
0	PC(18:1/22:6)+HCOO	PC(40:7)+HCOO	PC	(18:1/22:6)	(18:1)	(22:6)			876.576	C49 H83 O10 N1 P1	0	0	0	0	136935	0	1.1133e+06	0	0	0	0	0	0	0	0	0	0	0	0	0	0	0	0	0	0	0	0	0	0	4.97314e+07	0	0	0	0	0	0
0	PC(40:7)+H	PC(40:7)+H	PC	(18:1/22:6)	(18:1)	(22:6)			832.585	C48 H83 O8 N1 P1	1.40828e+06	0	8488.57	0	2.54323e+06	0	1.36516e+06	0	405719	0	3.08772e+06	0	982091	0	0	0	0	1.272e+07	0	0	0	1692.49	0	0	0	0	0	2213.89	0	8.339e+08	0	692863	0	0	0	0	832.585		832.585
0	PC(18:1/22:6)+HCOO	PC(40:7)+HCOO	PC	(18:1/22:6)	(18:1)	(22:6)			876.576	C49 H83 O10 N1 P1	0	0	0	0	0	0	0	0	0	0	0	0	0	0	0	0	0	0	0	0	0	0	0	0	0	0	0	2.80681e+06	0	602895	0	0	0	0	0	0
0	PC(40:7)+H	PC(40:7)+H	PC	(18:1/22:6)	(18:1)	(22:6)			832.585	C48 H83 O8 N1 P1	0	0	0	63018.7	0	0	0	0	0	0	0	0	0	0	0	0	184893	0	0	180370	0	2138.38	0	0	0	6901.7	0	4.74466e+07	0	548230	0	0	0	3041.47	0	0
0	PC(18:1/22:6)+HCOO	PC(40:7)+HCOO	PC	(18:1/22:6)	(18:1)	(22:6)			876.576	C49 H83 O10 N1 P1	0	0	0	0	0	0	0	0	0	0	0	0	0	0	0	0	0	0	0	0	0	0	0	2058.57	0	3.53845e+07	0	0	0	3343.31	0	0	0	0	0	0
0	PC(40:7)+H	PC(40:7)+H	PC	(18:1/22:6)	(18:1)	(22:6)			832.585	C48 H83 O8 N1 P1	0	86616.3	0	0	0	0	0	0	0	0	0	0	0	0	0	0	64628.2	0	0	0	0	1.63403e+06	0	3.85014e+06	0	5.88291e+08	37458.5	0	0	0	0	0	0	0	0	0
0	PC(18:1/22:6)+HCOO	PC(40:7)+HCOO	PC	(18:1/22:6)	(18:1)	(22:6)			876.576	C49 H83 O10 N1 P1	0	0	0	0	0	0	0	0	0	0	0	0	0	0	0	0	0	0	41429.4	1.68964e+07	0	2.53597e+07	0	4.34535e+07	0	48551.9	0	92416.2	0	0	0	0	0	0	0	0
0	PC(40:7)+H	PC(40:7)+H	PC	(18:1/22:6)	(18:1)	(22:6)			832.585	C48 H83 O8 N1 P1	0	0	0	0	0	0	0	122309	68971.4	0	0	104976	0	0	865649	0	0	0	0	2.63917e+08	0	4.12505e+08	0	7.97586e+08	0	2.83202e+07	0	1.30823e+07	1.21599e+06	0	318397	0	82567.1	0	0	0
0	PC(18:1/22:6)+HCOO	PC(40:7)+HCOO	PC	(18:1/22:6)	(18:1)	(22:6)			876.576	C49 H83 O10 N1 P1	0	0	0	0	0	0	0	0	0	0	0	0	0	0	0	0	0	0	0	0	0	0	0	0	0	62338	0	0	0	0	0	0	0	0	0	3.57995e+06
0	PC(40:7)+H	PC(40:7)+H	PC	(18:1/22:6)	(18:1)	(22:6)			832.585	C48 H83 O8 N1 P1	0	0	0	0	0	0	0	0	0	153980	0	0	0	0	0	0	0	0	0	681260	0	1.8499e+07	0	3.13979e+07	0	0	0	0	0	0	0	0	0	214376	0	5.29268e+07
0	PC(18:1/22:6)+HCOO	PC(40:7)+HCOO	PC	(18:1/22:6)	(18:1)	(22:6)			876.576	C49 H83 O10 N1 P1	0	280.891	0	0	0	0	0	0	0	0	0	0	0	0	0	0	0	0	0	2430.79	0	0	0	0	0	0	0	0	0	0	0	0	0	1.36993e+07	0	0		876.576
0	PC(40:7)+H	PC(40:7)+H	PC	(18:1/22:6)	(18:1)	(22:6)			832.585	C48 H83 O8 N1 P1	0	0	0	0	0	0	0	0	0	0	0	0	0	0	0	0	0	0	64265	3.84079e+06	9895.65	0	240978	0	2275.66	0	73174.1	0	0	0	0	0	0	3.56043e+07	42676.5	0
0	PC(18:1p/22:6)+HCOO	PC(40:7p)+HCOO	PC	(18:1p/22:6)	(18:1p)	(22:6)			860.581	C49 H83 O9 N1 P1	0	0	1.93836e+06	0	7469.85	0	0	0	0	0	6071.19	0	0	0	0	0	0	120136	0	0	0	0	0	0	0	0	0	0	0	0	0	0	0	0	0	0			860.581
0	PC(20:4/20:4)+HCOO	PC(40:8)+HCOO	PC	(20:4/20:4)	(20:4)	(20:4)			874.56	C49 H81 O10 N1 P1	0	0	1.58944e+06	0	236195	0	0	0	0	0	913402	0	0	0	0	0	0	2.06408e+06	0	0	0	0	0	0	0	0	0	0	0	0	0	0	0	0	0	0			874.562
0	PC(40:8)+H	PC(40:8)+H	PC	(20:4/20:4)	(20:4)	(20:4)			830.569	C48 H81 O8 N1 P1	1.02446e+06	0	2.37862e+07	0	1.93508e+07	0	2.44894e+07	0	467792	0	2.25514e+07	0	0	0	0	0	113046	2.69241e+07	0	0	0	0	0	79163.4	0	0	0	0	0	3969.85	0	777207	0	0	0	0	830.569		830.568
0	PC(40:8)+H	PC(40:8)+H	PC	(40:8)	(40:8)				830.569	C48 H81 O8 N1 P1	0	0	0	0	0	0	307540	0	0	0	0	0	0	0	0	0	0	0	0	0	0	0	0	0	0	0	0	643667	0	904521	0	4.34338e+06	0	0	0	0
0	PC(40:8)+H	PC(40:8)+H	PC	(40:8)	(40:8)				830.569	C48 H81 O8 N1 P1	574336	0	1.86367e+07	0	1.92413e+07	452.141	4.77246e+06	0	4228.39	0	1.86924e+07	0	210.095	0	65.361	1352.02	0	4.08157e+07	0	0	0	0	0	0	0	370817	0	0	0	2.7601e+07	0	46756.8	0	0	0	0	830.569		830.569
0	PC(40:8)+H	PC(40:8)+H	PC	(40:8)	(40:8)				830.569	C48 H81 O8 N1 P1	0	0	0	0	0	0	0	0	0	0	0	0	0	0	1841.86	0	0	0	11217.7	5.00517e+06	0	990806	0	1.33415e+06	0	3.3281e+07	462.218	2364.14	0	0	0	0	0	1.07835e+06	75.247	4678.39
0	PC(20:4/20:4)+HCOO	PC(40:8)+HCOO	PC	(20:4/20:4)	(20:4)	(20:4)			874.56	C49 H81 O10 N1 P1	0	0	0	0	0	0	0	0	0	0	0	0	0	0	0	0	0	0	0	0	0	1.11178e+06	0	2.41722e+06	0	0	0	0	0	740501	0	0	0	0	0	0
0	PC(40:8)+H	PC(40:8)+H	PC	(20:4/20:4)	(20:4)	(20:4)			830.569	C48 H81 O8 N1 P1	0	0	0	0	0	0	0	32088.7	0	95533.5	0	762748	0	292847	0	0	0	0	0	1.64207e+07	0	2.04339e+07	0	4.13566e+07	0	9.96824e+06	0	0	0	0	0	0	0	67238.7	77467.4	312934
0	PC(40:8)+H	PC(40:8)+H	PC	(40:8)	(40:8)				830.569	C48 H81 O8 N1 P1	0	0	0	31201	0	0	0	0	0	110942	0	0	0	0	0	0	814885	0	0	1.35194e+07	0	307633	0	223102	0	0	0	0	0	0	0	0	0	3.37319e+06	0	3581.88
0	PC(40:9)+H	PC(40:9)+H	PC	(40:9)	(40:9)				828.554	C48 H79 O8 N1 P1	485771	0	1.03277e+08	0	1.01342e+08	0	9.71325e+07	0	2.37775e+06	0	1.01058e+08	0	1.57193e+06	0	515166	160473	0	1.52195e+08	0	130949	0	0	0	0	0	0	0	67199.1	33682.5	0	122618	0	0	130849	0	0	828.55		828.55
0	PC(40:9)+H	PC(40:9)+H	PC	(40:9)	(40:9)				828.554	C48 H79 O8 N1 P1	0	0	0	0	0	0	1.52114e+06	0	0	0	9585.67	0	0	0	2019.43	0	0	12788	0	0	0	0	0	0	0	304727	0	0	0	549218	0	2.79407e+07	0	0	0	0
0	PC(40:9)+H	PC(40:9)+H	PC	(40:9)	(40:9)				828.554	C48 H79 O8 N1 P1	52038.2	0	0	0	0	0	0	0	0	0	790944	0	0	0	0	0	0	1.32821e+06	0	0	0	4067.64	12818.7	2661.89	0	0	0	0	0	1.94519e+08	0	0	0	70564.5	0	0	828.554
0	PC(40:9)+H	PC(40:9)+H	PC	(40:9)	(40:9)				828.554	C48 H79 O8 N1 P1	0	0	0	0	0	0	0	0	0	0	0	0	0	0	0	0	0	0	0	0	0	0	0	4888.16	0	202397	0	9.18702e+06	0	0	0	0	0	52373.4	0	0
0	PC(40:9)+H	PC(40:9)+H	PC	(40:9)	(40:9)				828.554	C48 H79 O8 N1 P1	0	0	0	0	0	0	0	0	0	0	0	0	0	0	0	0	0	0	0	183077	0	620737	0	268318	0	1.48496e+08	0	0	0	0	0	0	0	0	0	0
0	PC(40:9)+H	PC(40:9)+H	PC	(40:9)	(40:9)				828.554	C48 H79 O8 N1 P1	0	0	0	0	0	0	0	184909	0	0	0	0	0	0	0	0	0	0	0	71073786	0	9.78712e+07	0	2.04652e+08	0	0	0	0	0	0	0	0	0	0	0	0
0	PC(40:9)+H	PC(40:9)+H	PC	(40:9)	(40:9)				828.554	C48 H79 O8 N1 P1	0	1703.7	0	138765	0	0	0	0	0	0	0	0	0	0	0	0	203526	0	0	0	0	0	0	0	0	0	0	0	0	0	0	0	0	32709.1	0	1.49272e+06		828.554
0	PC(40:9)+H	PC(40:9)+H	PC	(40:9)	(40:9)				828.554	C48 H79 O8 N1 P1	0	0	0	0	0	0	0	0	0	0	0	0	0	0	0	0	0	0	0	0	0	0	0	0	0	0	0	0	0	0	0	0	19493.4	5.31601e+06	0	0
0	PC(18:1/23:0)+HCOO	PC(41:1)+HCOO	PC	(18:1/23:0)	(18:1)	(23:0)			902.686	C50 H97 O10 N1 P1	0	0	2.4563e+06	0	3.06076e+06	0	2.65258e+06	0	0	0	2.05566e+06	0	0	0	0	0	0	2.87177e+06	0	0	0	0	0	0	0	0	0	0	0	0	0	0	0	0	0	0			902.686
0	PC(41:1)+H	PC(41:1)+H	PC	(18:1/23:0)	(18:1)	(23:0)			858.695	C49 H97 O8 N1 P1	974622	0	2.52849e+07	0	2.59579e+07	0	2.25795e+07	0	0	0	2.16245e+07	0	0	0	0	0	0	4.63475e+07	0	0	0	0	0	0	0	0	0	0	0	8018.09	0	0	0	0	0	54162.1	858.695		858.694
0	PC(41:1)+H	PC(41:1)+H	PC	(41:1)	(41:1)				858.695	C49 H97 O8 N1 P1	0	3312.53	0	0	0	0	0	0	0	0	0	0	0	0	0	0	0	0	0	0	0	0	0	0	0	0	0	0	0	1.13833e+08	0	0	0	28561.4	0	0		858.695
0	PC(25:1/16:0)+H	PC(41:1)+H	PC	(25:1/16:0)	(25:1)	(16:0)			858.695	C49 H97 O8 N1 P1	0	0	0	0	0	0	0	0	0	0	0	0	0	0	0	0	0	0	0	893273	0	5.56323e+07	0	7.7713e+07	0	6719.52	0	0	0	0	0	0	0	0	0	0
1	PC(41:1)+H	PC(41:1)+H	PC	(41:1)	(41:1)				858.695	C49 H97 O8 N1 P1	0	0	0	0	0	0	0	0	0	0	0	0	0	0	0	0	2174.95	0	0	1.747e+07	0	17336.1	0	0	0	0	0	0	0	0	0	0	0	1820.22	0	0
0	PC(18:1/23:1)+HCOO	PC(41:2)+HCOO	PC	(18:1/23:1)	(18:1)	(23:1)			900.67	C50 H95 O10 N1 P1	0	0	0	0	0	0	0	0	0	0	0	0	0	0	0	0	0	0	0	0	10896.6	0	0	0	0	0	0	0	0	1.00449e+06	0	0	0	0	0	0
0	PC(41:2)+H	PC(41:2)+H	PC	(18:1/23:1)	(18:1)	(23:1)			856.679	C49 H95 O8 N1 P1	0	0	0	0	0	0	0	0	0	0	0	0	0	0	0	0	0	0	0	0	0	0	0	0	0	0	0	0	0	3.75703e+07	0	0	0	0	0	0
0	PC(18:1/24:0)+HCOO	PC(42:1)+HCOO	PC	(18:1/24:0)	(18:1)	(24:0)			916.701	C51 H99 O10 N1 P1	231812	0	1.28449e+07	0	1.32572e+07	0	1.21705e+07	0	0	0	1.05272e+07	0	0	0	0	0	0	33495.2	0	0	0	0	0	0	0	0	0	0	0	0	0	0	0	0	0	0	916.701		916.703
0	PC(42:1)+H	PC(42:1)+H	PC	(18:1/24:0)	(18:1)	(24:0)			872.71	C50 H99 O8 N1 P1	4.71014e+06	0	1.4562e+08	0	1.42998e+08	0	1.46509e+08	0	1.58904e+06	84724.5	1.08883e+08	0	3436.22	0	0	1.18285e+06	0	2.68248e+08	0	0	0	0	0	0	0	0	0	0	0	626807	0	2926.45	0	0	187206	0	872.709		872.709
0	PC(18:1/24:0)+HCOO	PC(42:1)+HCOO	PC	(18:1/24:0)	(18:1)	(24:0)			916.701	C51 H99 O10 N1 P1	0	0	0	0	0	0	0	0	0	0	0	0	0	0	0	0	0	0	0	0	0	0	0	0	0	0	0	0	0	3.87133e+07	0	2.29734e+06	0	0	0	0
0	PC(42:1)+H	PC(42:1)+H	PC	(18:1/24:0)	(18:1)	(24:0)			872.71	C50 H99 O8 N1 P1	0	0	0	0	0	0	0	0	0	0	0	0	0	0	0	0	0	0	0	0	0	0	0	0	0	0	0	0	0	6.43893e+08	0	2.96651e+07	0	0	0	0
0	PC(18:1/24:0)+HCOO	PC(42:1)+HCOO	PC	(18:1/24:0)	(18:1)	(24:0)			916.701	C51 H99 O10 N1 P1	0	0	0	0	0	0	0	0	0	0	0	0	0	0	0	0	0	0	0	0	0	0	0	0	0	0	0	2.0021e+06	0	0	0	0	0	0	0	0
0	PC(42:1)+H	PC(42:1)+H	PC	(18:1/24:0)	(18:1)	(24:0)			872.71	C50 H99 O8 N1 P1	0	0	0	0	0	0	0	0	0	0	0	0	0	0	0	0	0	0	0	0	0	0	0	0	0	233088	0	1.70799e+07	0	0	0	0	0	0	0	0
0	PC(18:1/24:0)+HCOO	PC(42:1)+HCOO	PC	(18:1/24:0)	(18:1)	(24:0)			916.701	C51 H99 O10 N1 P1	0	15186.9	0	0	0	0	56806.9	0	0	0	0	0	0	0	0	0	0	0	0	157174	0	2.20679e+07	0	3.13818e+07	0	1.93688e+07	0	0	0	0	0	0	0	0	0	0		916.701
0	PC(42:1)+H	PC(42:1)+H	PC	(18:1/24:0)	(18:1)	(24:0)			872.71	C50 H99 O8 N1 P1	0	0	0	0	0	0	0	0	0	0	0	0	0	0	0	0	0	0	0	2.42321e+07	0	2.76047e+08	0	3.91326e+08	0	1.83395e+08	0	0	0	0	0	0	0	0	0	0
1	PC(18:1/24:0)+HCOO	PC(42:1)+HCOO	PC	(18:1/24:0)	(18:1)	(24:0)			916.701	C51 H99 O10 N1 P1	221164	12834.6	1.34053e+07	0	1.40629e+07	0	58757.1	0	0	0	1.09734e+07	0	0	0	0	0	0	1.94057e+07	0	8.58332e+06	0	2.33274e+07	0	3.22966e+07	0	2.02844e+07	0	1.99744e+06	0	4.33245e+07	0	2.35497e+06	0	0	0	42834.2
1	PC(42:1)+H	PC(42:1)+H	PC	(18:1/24:0)	(18:1)	(24:0)			872.71	C50 H99 O8 N1 P1	0	0	0	0	0	0	0	0	0	0	0	0	0	0	0	0	0	0	0	8.80651e+07	0	2.93275e+08	0	4.07634e+06	0	1.27085e+07	0	0	0	0	0	0	0	0	0	0
0	PC(20:4/22:6)+HCOO	PC(42:10)+HCOO	PC	(20:4/22:6)	(20:4)	(22:6)			898.56	C51 H81 O10 N1 P1	102751	0	4.40706e+06	0	3.86171e+06	0	4.96316e+06	0	0	0	3.29555e+06	0	0	0	0	0	0	7.429e+06	0	0	0	0	0	0	0	0	0	0	0	0	0	0	0	0	0	0	898.56		898.562
0	PC(42:10)+H	PC(42:10)+H	PC	(20:4/22:6)	(20:4)	(22:6)			854.569	C50 H81 O8 N1 P1	3.12509e+06	14152.1	3.77539e+07	19534.4	3.45074e+07	0	4.20949e+07	0	1.10902e+06	0	2.95759e+07	0	151147	0	339399	349637	1.30326e+07	5.10631e+07	0	177453	0	302036	0	2.88132e+07	0	59434.2	0	0	0	0	0	0	0	0	0	0	854.568	854.569	854.569
0	PC(42:10)+H	PC(42:10)+H	PC	(42:10)	(42:10)				854.569	C50 H81 O8 N1 P1	0	916768	0	82532.2	0	0	0	0	0	0	0	0	0	0	0	0	72163.7	0	0	1.52528e+07	0	2.50227e+06	0	1.06551e+06	0	0	0	0	342.68	0	528.475	1.29973e+07	0	0	0	1572.72		854.569
0	PC(20:4/22:6)+HCOO	PC(42:10)+HCOO	PC	(20:4/22:6)	(20:4)	(22:6)			898.56	C51 H81 O10 N1 P1	0	0	0	0	0	0	0	0	0	0	0	0	0	0	0	0	0	0	0	0	0	0	0	0	0	0	0	0	0	4.46018e+06	0	0	0	0	0	0
0	PC(42:10)+H	PC(42:10)+H	PC	(20:4/22:6)	(20:4)	(22:6)			854.569	C50 H81 O8 N1 P1	730055	37405.2	1.74474e+07	0	8.93456e+06	0	88917.4	0	6078.7	0	4.84878e+06	0	0	0	0	0	0	2.53959e+07	0	3582.19	0	0	0	0	0	0	0	0	49691.2	5.93559e+07	740915	0	0	53440.7	0	9.58702e+06	854.569	854.569	854.569
0	PC(42:10)+H	PC(42:10)+H	PC	(42:10)	(42:10)				854.569	C50 H81 O8 N1 P1	0	0	0	0	0	0	0	0	0	0	0	464751	0	187971	0	0	888.932	0	150434	0	829477	0	0	0	3070.31	0	380835	1.76378e+06	0	0	392458	0	0	0	29352.7	0
0	PC(20:4/22:6)+HCOO	PC(42:10)+HCOO	PC	(20:4/22:6)	(20:4)	(22:6)			898.56	C51 H81 O10 N1 P1	0	0	0	0	0	0	0	0	0	0	0	0	0	0	0	0	0	0	0	0	0	0	0	0	0	2.51379e+06	0	0	0	65021.6	0	0	0	0	0	0
0	PC(42:10)+H	PC(42:10)+H	PC	(20:4/22:6)	(20:4)	(22:6)			854.569	C50 H81 O8 N1 P1	0	0	0	0	0	154717	0	2290.38	0	0	0	0	0	0	0	0	171815	0	657728	0	791925	0	1.90884e+07	0	2811.71	4.60677e+07	212292	0	0	0	0	0	25812.6	0	0	0
0	PC(20:4/22:6)+HCOO	PC(42:10)+HCOO	PC	(20:4/22:6)	(20:4)	(22:6)			898.56	C51 H81 O10 N1 P1	0	0	362907	0	227182	0	4529.69	0	0	0	1.07864e+06	0	0	0	0	0	0	0	0	0	0	1.79782e+06	0	4.06432e+06	0	0	0	0	0	0	0	0	0	0	0	0			898.56
0	PC(42:10)+H	PC(42:10)+H	PC	(20:4/22:6)	(20:4)	(22:6)			854.569	C50 H81 O8 N1 P1	0	4.54218e+06	0	100496	0	0	0	0	0	0	0	0	0	0	117971	0	654711	0	0	2.51296e+07	0	3.14032e+07	0	7.10509e+07	0	2.13123e+07	0	0	292572	0	234632	307955	5.72276e+06	0	559625	0		854.569
0	PC(42:10)+H	PC(42:10)+H	PC	(42:10)	(42:10)				854.569	C50 H81 O8 N1 P1	0	0	0	0	0	0	0	0	0	0	0	0	0	0	687318	0	0	0	0	6.67814e+06	0	0	0	0	0	5410.82	0	0	0	0	1.19723e+06	0	0	1.30079e+07	0	0
0	PC(42:11)+CH3COO	PC(42:11)+CH3COO	PC	(42:11)	(42:11)				910.56	C52 H81 O10 N1 P1	0	0	286886	0	208563	0	0	0	0	0	711727	0	0	0	0	0	0	0	0	0	0	0	0	0	0	0	0	0	0	0	0	0	0	0	0	0
0	PC(18:1/24:1)+HCOO	PC(42:2)+HCOO	PC	(18:1/24:1)	(18:1)	(24:1)			914.686	C51 H97 O10 N1 P1	0	0	3.70783e+06	0	4.86597e+06	0	3.69892e+06	0	0	0	3.31127e+06	0	0	0	0	0	0	4.42481e+06	0	0	0	0	0	0	0	0	0	0	0	0	0	0	0	0	0	0			914.687
0	PC(42:2)+H	PC(42:2)+H	PC	(18:1/24:1)	(18:1)	(24:1)			870.695	C50 H97 O8 N1 P1	2.26413e+06	0	5.48453e+07	0	6.60586e+07	0	5.0421e+07	0	245182	0	4.40847e+07	0	228956	0	0	0	0	9.86909e+07	0	0	0	0	0	0	0	792793	0	0	0	0	0	188611	0	0	0	0	870.694		870.693
0	PC(18:1/24:1)+HCOO	PC(42:2)+HCOO	PC	(18:1/24:1)	(18:1)	(24:1)			914.686	C51 H97 O10 N1 P1	0	0	0	0	0	0	0	0	0	0	0	0	0	0	0	0	0	0	0	0	0	0	0	0	0	0	0	0	0	1.27692e+07	0	0	0	0	0	0
0	PC(42:2)+H	PC(42:2)+H	PC	(18:1/24:1)	(18:1)	(24:1)			870.695	C50 H97 O8 N1 P1	0	0	0	0	0	0	0	0	0	0	0	0	0	0	0	0	0	0	0	0	0	0	0	0	0	0	0	532853	0	2.82137e+08	0	1.12162e+07	0	0	0	0
0	PC(18:1/24:1)+HCOO	PC(42:2)+HCOO	PC	(18:1/24:1)	(18:1)	(24:1)			914.686	C51 H97 O10 N1 P1	0	0	0	0	0	0	0	0	0	0	0	0	0	0	0	0	0	0	0	134719	0	1.02108e+07	0	7.87839e+06	0	5.81992e+06	0	0	0	0	0	0	0	0	0	0
0	PC(42:2)+H	PC(42:2)+H	PC	(18:1/24:1)	(18:1)	(24:1)			870.695	C50 H97 O8 N1 P1	0	0	0	0	0	0	0	0	0	0	0	0	0	0	85106.4	0	0	0	0	4.68324e+07	0	1.21154e+08	0	1.59995e+08	0	6.04017e+07	0	0	0	0	0	0	0	416214	0	358381
0	PC(42:3)+H	PC(42:3)+H	PC	(42:3)	(42:3)				868.679	C50 H95 O8 N1 P1	0	0	0	0	0	0	0	0	0	0	0	0	0	0	0	0	0	0	0	0	0	0	0	0	0	0	0	9389.29	0	2.06452e+07	0	0	0	0	0	0
0	PC(42:4)+H	PC(42:4)+H	PC	(42:4)	(42:4)				866.663	C50 H93 O8 N1 P1	186824	37667.6	1.49078e+07	0	1.38145e+07	0	1.25626e+07	0	0	0	1.03786e+07	0	0	0	0	0	0	689843	0	0	0	0	0	0	0	0	0	0	0	0	0	0	0	0	0	0	866.663	866.663	866.662
0	PC(42:4)+H	PC(42:4)+H	PC	(42:4)	(42:4)				866.663	C50 H93 O8 N1 P1	0	0	0	0	6494.68	0	22454.3	0	0	0	16726.5	0	0	0	0	0	0	0	0	0	0	0	0	0	0	0	0	0	0	22691.1	0	6.0368e+06	0	0	0	0
0	PC(42:4)+H	PC(42:4)+H	PC	(42:4)	(42:4)				866.663	C50 H93 O8 N1 P1	0	0	0	0	0	0	0	0	0	0	0	0	0	0	0	0	0	0	0	0	0	0	0	0	0	615067	0	0	0	3.94608e+07	0	0	0	0	0	0
0	PC(42:4)+H	PC(42:4)+H	PC	(42:4)	(42:4)				866.663	C50 H93 O8 N1 P1	0	0	0	0	0	0	0	0	0	0	0	0	0	0	0	0	0	0	0	0	0	0	0	0	0	2.68837e+07	0	82358.7	0	0	0	0	0	0	0	0
0	PC(42:4)+H	PC(42:4)+H	PC	(42:4)	(42:4)				866.663	C50 H93 O8 N1 P1	0	0	0	0	0	0	0	0	0	0	0	0	0	0	0	0	0	0	0	15244.1	0	1.69158e+07	0	3.3583e+07	0	3032.27	0	0	0	0	0	0	0	23135	0	0
0	PC(42:5)+H	PC(42:5)+H	PC	(42:5)	(42:5)				864.648	C50 H91 O8 N1 P1	149847	0	7.84344e+06	0	8.07362e+06	96771.5	3.35683e+06	0	0	0	6.18296e+06	0	0	0	0	0	0	1.32399e+07	0	287313	0	3.68311e+06	0	4.61359e+06	0	0	0	0	0	0	0	44388.2	0	0	0	0	864.648		864.647
0	PC(42:5)+H	PC(42:5)+H	PC	(42:5)	(42:5)				864.648	C50 H91 O8 N1 P1	0	0	0	0	0	0	0	0	0	0	0	0	0	0	0	0	0	0	0	0	0	0	28042.5	0	159972	1.17541e+06	335.914	0	0	3.14067e+07	0	972.841	0	0	0	0
0	PC(42:5)+H	PC(42:5)+H	PC	(42:5)	(42:5)				864.648	C50 H91 O8 N1 P1	0	0	0	0	0	0	0	229763	0	75438.2	0	0	0	0	0	0	0	0	0	0	0	0	0	0	0	2.09771e+07	0	0	0	0	0	0	0	0	0	59373.8
0	PC(42:5)+H	PC(42:5)+H	PC	(42:5)	(42:5)				864.648	C50 H91 O8 N1 P1	0	0	0	0	0	0	0	0	0	0	0	9357.93	0	0	0	0	0	0	0	0	0	1.03284e+07	0	2.21201e+07	1874.38	0	0	0	0	0	0	0	0	37618.2	0	0
0	PC(42:6)+H	PC(42:6)+H	PC	(42:6)	(42:6)				862.632	C50 H89 O8 N1 P1	0	0	559863	0	45480.5	75532.5	5.16578e+06	57605.2	0	178739	23947	77030.4	0	0	0	0	0	1.01917e+07	0	0	0	0	0	0	0	162369	0	0	0	262581	0	0	0	0	0	0			862.63
0	PC(42:6)+H	PC(42:6)+H	PC	(42:6)	(42:6)				862.632	C50 H89 O8 N1 P1	0	0	0	1.537e+06	0	0	0	0	0	0	0	0	0	0	63073.6	0	752023	0	0	0	0	0	0	0	0	0	0	0	0	1.70724e+07	0	3491.78	0	0	0	0
0	PC(42:6e)+H	PC(42:6e)+H	PC	(42:6e)	(42:6e)				848.653	C50 H91 O7 N1 P1	0	0	0	0	0	0	0	0	0	0	0	0	0	0	0	0	0	0	0	220989	0	1.92154e+07	0	2.29943e+07	0	0	0	0	0	0	1333.63	0	0	0	0	0
0	PC(20:1/22:6)+HCOO	PC(42:7)+HCOO	PC	(20:1/22:6)	(20:1)	(22:6)			904.607	C51 H87 O10 N1 P1	0	0	2.89118e+06	0	3.27616e+06	0	2.01661e+06	0	0	0	2.4473e+06	0	0	0	0	0	0	4.34613e+06	0	0	0	0	0	0	0	0	0	0	0	0	0	0	0	0	0	0			904.608
0	PC(42:7)+H	PC(42:7)+H	PC	(20:1/22:6)	(20:1)	(22:6)			860.616	C50 H87 O8 N1 P1	1.73314e+06	0	4.38194e+07	0	4.12182e+07	0	3.75841e+07	0	1.32059e+06	0	3.63186e+07	0	327042	0	0	502660	0	7.58206e+07	0	0	0	71519.7	0	214451	0	0	0	0	0	92054.1	0	0	0	0	0	0	860.616		860.615
0	PC(42:7)+H	PC(42:7)+H	PC	(42:7)	(42:7)				860.616	C50 H87 O8 N1 P1	0	0	0	0	0	0	0	0	0	0	8455.61	0	0	0	0	0	0	0	0	702062	0	719913	0	151906	0	1308.67	0	0	0	17920.7	0	9.27708e+06	0	0	0	0
0	PC(20:1/22:6)+HCOO	PC(42:7)+HCOO	PC	(20:1/22:6)	(20:1)	(22:6)			904.607	C51 H87 O10 N1 P1	49811.2	0	3.82126e+06	0	7.99511e+06	0	877921	0	47335.7	0	1.46713e+07	0	0	0	0	0	0	0	0	0	0	0	0	0	0	0	0	0	0	3.67104e+06	0	0	0	0	0	0	904.607		904.607
0	PC(42:7)+H	PC(42:7)+H	PC	(20:1/22:6)	(20:1)	(22:6)			860.616	C50 H87 O8 N1 P1	6190.39	0	1.77216e+06	0	1930.68	0	0	0	0	0	2176.91	0	0	0	0	0	0	14341.9	0	0	0	0	0	0	0	0	0	0	0	9.06085e+07	0	0	0	0	0	88379.1	860.616		860.616
0	PC(20:1/22:6)+HCOO	PC(42:7)+HCOO	PC	(20:1/22:6)	(20:1)	(22:6)			904.607	C51 H87 O10 N1 P1	0	0	0	0	0	0	0	0	0	0	0	0	0	0	0	0	0	0	0	0	0	0	0	0	0	2.7831e+06	0	0	0	0	0	0	0	0	0	0
0	PC(42:7)+H	PC(42:7)+H	PC	(20:1/22:6)	(20:1)	(22:6)			860.616	C50 H87 O8 N1 P1	0	0	0	0	0	0	0	0	0	0	0	0	0	0	0	0	0	0	0	0	0	3970.39	0	0	0	1.23307e+08	0	0	0	5414.14	0	0	0	0	0	0
0	PC(20:1/22:6)+HCOO	PC(42:7)+HCOO	PC	(20:1/22:6)	(20:1)	(22:6)			904.607	C51 H87 O10 N1 P1	0	0	0	0	0	0	0	0	0	0	0	0	0	0	0	0	0	0	56324.9	6045.38	0	1.5438e+06	0	3.7505e+06	0	1.68863e+07	0	0	0	0	0	0	0	0	0	0
0	PC(42:7)+H	PC(42:7)+H	PC	(20:1/22:6)	(20:1)	(22:6)			860.616	C50 H87 O8 N1 P1	0	42430.6	0	1335.53	0	0	0	0	0	0	0	0	0	0	0	0	0	0	0	464615	0	5.09314e+07	0	8.79207e+07	0	2.56755e+06	0	0	0	100604	0	0	0	0	0	0		860.616
0	PC(42:7p)+HCOO	PC(42:7p)+HCOO	PC	(42:7p)	(42:7p)				888.612	C51 H87 O9 N1 P1	0	0	0	0	0	0	0	0	0	0	0	0	0	0	0	0	0	0	0	0	0	0	0	0	0	1.49831e+06	0	0	0	0	0	0	0	0	0	0
0	PC(42:8)+H	PC(42:8)+H	PC	(42:8)	(42:8)				858.601	C50 H85 O8 N1 P1	144564	0	4.08212e+06	0	5.27713e+06	40064.5	6.10176e+06	59590.1	120667	141031	3.62911e+06	0	0	0	0	0	0	8.11087e+06	0	0	0	0	0	0	0	0	0	0	0	6.18335e+06	0	0	0	0	0	0	858.601		858.598
0	PC(42:8)+H	PC(42:8)+H	PC	(42:8)	(42:8)				858.601	C50 H85 O8 N1 P1	76377	0	5.34139e+06	118262	6.43241e+06	0	588438	0	0	0	5.78042e+06	0	0	0	0	0	494583	5.56234e+06	0	0	0	0	0	0	0	0	0	3.27324e+06	61386.7	7.42732e+06	0	3.48929e+06	0	0	0	0	858.601		858.601
0	PC(42:8)+H	PC(42:8)+H	PC	(42:8)	(42:8)				858.601	C50 H85 O8 N1 P1	0	0	0	0	0	0	0	0	0	0	0	0	0	0	0	0	0	0	0	0	0	0	0	105780	0	3.31128e+06	0	0	0	0	0	0	0	87157.1	0	483985
0	PC(42:8)+H	PC(42:8)+H	PC	(42:8)	(42:8)				858.601	C50 H85 O8 N1 P1	0	0	0	0	0	0	0	0	0	0	0	386161	0	37092	0	0	0	0	0	1.44169e+06	0	6.06103e+06	0	9.85516e+06	0	5.25741e+06	101812	0	0	0	0	0	0	0	42142.1	0
0	PC(42:9)+H	PC(42:9)+H	PC	(42:9)	(42:9)				856.585	C50 H83 O8 N1 P1	0	1529.98	162475	133347	698173	0	4.38747e+06	0	62775.5	0	1.66923e+06	0	0	0	26303.4	0	396838	0	0	2259.47	0	1.3968e+06	0	366526	0	0	0	0	0	133636	0	0	0	0	0	0		856.585	856.585
0	PC(42:9)+H	PC(42:9)+H	PC	(42:9)	(42:9)				856.585	C50 H83 O8 N1 P1	0	0	0	0	0	0	0	0	0	0	0	0	0	0	166801	0	0	3.65009e+06	0	863.629	0	0	0	0	0	0	0	3134.44	0	8.5944e+06	0	0	0	57625.3	0	0
0	PC(42:9)+H	PC(42:9)+H	PC	(42:9)	(42:9)				856.585	C50 H83 O8 N1 P1	2.18109e+06	0	6.74032e+07	0	6.45326e+07	0	1.07874e+07	0	1.28302e+06	0	5.79516e+07	0	792474	0	276206	7055.97	0	9.3959e+07	0	0	0	0	9535.5	135855	0	0	0	0	2.23199e+06	118821	987580	0	0	0	0	0	856.585		856.582
0	PC(42:9)+H	PC(42:9)+H	PC	(42:9)	(42:9)				856.585	C50 H83 O8 N1 P1	0	0	1.79892e+06	0	955154	0	699205	0	0	0	1.7828e+06	0	0	0	0	0	0	1.04412e+06	0	0	63732.5	0	0	0	0	0	7523.78	0	0	6816.56	0	2.00265e+07	0	0	644.436	0			856.585
0	PC(42:9)+H	PC(42:9)+H	PC	(42:9)	(42:9)				856.585	C50 H83 O8 N1 P1	0	0	0	0	0	0	0	0	0	0	0	0	0	0	0	0	461273	0	139526	0	36537.7	0	0	0	0	5.05792e+06	24047.6	0	0	0	0	0	0	0	811745	0
0	PC(42:9)+H	PC(42:9)+H	PC	(42:9)	(42:9)				856.585	C50 H83 O8 N1 P1	0	0	0	0	0	0	0	0	0	0	0	0	0	0	0	0	0	0	0	2.11006e+06	0	4.7459e+06	0	1.04157e+07	0	197354	0	7.00382e+06	0	0	0	0	0	0	0	349888
0	PC(42:9)+H	PC(42:9)+H	PC	(42:9)	(42:9)				856.585	C50 H83 O8 N1 P1	0	0	0	0	0	0	0	0	0	0	163552	0	0	0	0	0	0	0	68638.7	4.99456e+07	0	2.68898e+06	58046.8	2.60773e+06	0	0	0	0	0	0	0	0	0	0	0	0
0	PC(27:1/16:0)+H	PC(43:1)+H	PC	(27:1/16:0)	(27:1)	(16:0)			886.726	C51 H101 O8 N1 P1	0	0	6.84333e+06	0	7.98826e+06	0	2.55382e+06	0	0	0	5.7535e+06	0	0	0	0	0	0	1.09449e+07	0	0	0	0	0	0	0	0	0	0	0	580569	0	0	0	0	0	0			886.726
0	PC(25:0/18:1)+HCOO	PC(43:1)+HCOO	PC	(25:0/18:1)	(25:0)	(18:1)			930.717	C52 H101 O10 N1 P1	0	0	0	0	0	0	0	0	0	0	0	0	0	0	0	0	0	0	0	0	0	0	0	0	0	0	0	0	0	1.72278e+06	0	0	0	0	0	0
0	PC(25:0/18:1)+H	PC(43:1)+H	PC	(25:0/18:1)	(25:0)	(18:1)			886.726	C51 H101 O8 N1 P1	0	0	0	0	0	0	0	0	0	0	0	0	0	0	0	0	0	0	0	0	0	0	0	0	0	0	0	0	0	2.72966e+07	0	0	0	0	0	0
0	PC(25:0/18:1)+H	PC(43:1)+H	PC	(25:0/18:1)	(25:0)	(18:1)			886.726	C51 H101 O8 N1 P1	0	0	0	0	0	0	0	0	0	0	0	0	0	0	0	0	0	0	0	13594.3	0	1.39352e+07	0	1.58472e+07	0	0	0	0	0	0	0	0	0	0	0	0
0	PC(44:1)+H	PC(44:1)+H	PC	(44:1)	(44:1)				900.742	C52 H103 O8 N1 P1	0	0	1.1173e+07	0	1.26118e+07	0	1.24842e+07	0	0	131005	8.28033e+06	0	0	0	0	0	0	1.88894e+07	0	0	0	0	0	0	0	0	0	0	0	2456.14	0	0	0	0	0	0			900.741
0	PC(44:1)+H	PC(44:1)+H	PC	(44:1)	(44:1)				900.742	C52 H103 O8 N1 P1	0	0	0	0	0	0	0	0	0	0	0	0	0	0	0	0	0	0	0	0	0	0	0	0	0	0	0	0	0	4.43445e+07	0	0	0	0	0	0
0	PC(44:1)+H	PC(44:1)+H	PC	(44:1)	(44:1)				900.742	C52 H103 O8 N1 P1	0	0	0	0	0	0	0	0	0	0	0	0	0	0	0	0	0	0	0	0	0	2.20704e+07	0	3.07959e+07	0	214006	0	0	0	0	0	0	0	0	0	0
0	PC(44:10)+H	PC(44:10)+H	PC	(44:10)	(44:10)				882.601	C52 H85 O8 N1 P1	0	0	4.86576e+06	0	1.1052e+06	0	0	0	0	0	577659	0	0	0	0	0	0	4.94062e+06	0	0	0	0	0	0	0	0	0	2.17752e+06	99935.6	2323.58	0	0	0	0	0	0			882.599
0	PC(22:6/22:6)+HCOO	PC(44:12)+HCOO	PC	(22:6/22:6)	(22:6)	(22:6)			922.56	C53 H81 O10 N1 P1	0	0	3.37341e+06	0	3.23657e+06	0	3.8509e+06	0	0	0	2.85011e+06	0	0	0	0	0	0	4.19297e+06	0	0	0	0	0	0	0	0	0	0	0	0	0	0	0	0	0	0			922.561
0	PC(44:12)+H	PC(44:12)+H	PC	(22:6/22:6)	(22:6)	(22:6)			878.569	C52 H81 O8 N1 P1	11438.2	0	2.20589e+07	0	2.28916e+07	0	2.33353e+07	0	1309.82	0	2.35912e+07	0	2994.42	0	0	0	0	1.97028e+07	0	0	0	0	0	0	0	240.931	0	0	0	0	0	0	0	0	0	0	878.569		878.569
0	PC(22:6/22:6)+HCOO	PC(44:12)+HCOO	PC	(22:6/22:6)	(22:6)	(22:6)			922.56	C53 H81 O10 N1 P1	0	0	0	0	0	0	0	0	0	0	0	0	0	0	0	0	0	0	0	0	0	0	0	0	0	0	0	0	0	3.30216e+06	0	0	0	0	0	0
0	PC(44:12)+H	PC(44:12)+H	PC	(44:12)	(44:12)				878.569	C52 H81 O8 N1 P1	0	0	313280	0	5839.38	0	3.55794e+06	471326	0	985766	4585.78	0	0	0	0	0	0	0	0	0	0	0	0	0	0	3.27712e+07	0	0	0	0	0	0	0	0	0	0			878.569
0	PC(22:6/22:6)+HCOO	PC(44:12)+HCOO	PC	(22:6/22:6)	(22:6)	(22:6)			922.56	C53 H81 O10 N1 P1	0	0	0	0	0	0	0	0	0	0	0	0	0	0	0	0	0	0	0	0	0	729633	0	3.03335e+06	0	0	0	0	0	0	0	0	0	0	0	0
0	PC(44:12)+H	PC(44:12)+H	PC	(22:6/22:6)	(22:6)	(22:6)			878.569	C52 H81 O8 N1 P1	0	3.61433e+06	0	1.66111e+06	0	59231.3	0	0	0	0	0	0	0	0	0	0	8.66068e+06	0	0	1.78622e+07	0	2.58954e+07	0	5.27148e+07	0	7.49486e+06	0	0	0	0	0	3.18993e+06	0	0	29894.6	0		878.569
0	PC(44:12)+H	PC(44:12)+H	PC	(44:12)	(44:12)				878.569	C52 H81 O8 N1 P1	0	0	0	0	0	0	0	0	0	0	0	0	0	0	0	0	0	0	0	0	0	0	0	0	0	4571.08	0	0	0	0	0	0	0	0	0	2.44199e+06
0	PC(44:12)+H	PC(44:12)+H	PC	(44:12)	(44:12)				878.569	C52 H81 O8 N1 P1	0	0	0	0	0	0	0	0	0	0	0	0	0	0	0	0	0	0	0	4.10921e+06	0	0	0	0	0	0	0	0	1.87517e+06	0	0	0	0	6.44432e+06	0	0
0	PC(44:2)+H	PC(44:2)+H	PC	(44:2)	(44:2)				898.726	C52 H101 O8 N1 P1	0	0	18257.5	0	32078.5	0	8.2161e+06	0	0	0	25584.8	0	0	0	0	0	0	32751.5	0	0	0	0	0	0	0	0	0	0	0	0	0	0	0	0	0	0			898.725
0	PC(44:2)+H	PC(44:2)+H	PC	(44:2)	(44:2)				898.726	C52 H101 O8 N1 P1	0	0	0	0	0	0	0	0	0	0	0	0	0	0	0	0	0	0	0	0	0	0	0	0	0	0	0	0	0	3.671e+07	0	0	0	0	0	0
0	PC(44:2)+H	PC(44:2)+H	PC	(44:2)	(44:2)				898.726	C52 H101 O8 N1 P1	36931.1	0	0	0	0	0	0	0	0	0	0	0	0	0	0	0	0	0	0	0	42286.7	2.3997e+07	0	3.0356e+06	0	0	0	0	0	0	0	0	0	0	0	0	898.726
0	PC(44:3p)+H	PC(44:3p)+H	PC	(44:3p)	(44:3p)				880.715	C52 H99 O7 N1 P1	0	107710	0	0	0	0	0	0	0	0	0	0	0	0	0	0	0	0	0	0	0	0	0	0	0	0	0	0	0	0	0	6.98406e+06	0	0	0	0		880.715
0	PC(44:3p)+H	PC(44:3p)+H	PC	(44:3p)	(44:3p)				880.715	C52 H99 O7 N1 P1	0	0	0	0	0	0	0	0	0	0	0	0	0	0	0	0	0	0	0	0	0	1.33308e+07	0	3.09556e+07	0	0	0	0	0	0	0	0	0	0	0	0
0	PC(44:4)+H	PC(44:4)+H	PC	(44:4)	(44:4)				894.695	C52 H97 O8 N1 P1	0	0	0	0	0	0	0	0	0	0	0	0	0	0	0	0	0	0	0	0	0	359289	0	1.06026e+06	0	0	0	0	0	3.05267e+07	0	292126	0	0	0	0
0	PC(44:5)+H	PC(44:5)+H	PC	(44:5)	(44:5)				892.679	C52 H95 O8 N1 P1	0	0	0	0	0	0	1.1683e+06	0	0	0	0	0	0	0	0	0	0	6.18885e+06	0	0	0	0	0	0	0	0	0	0	0	3.2322e+06	0	0	0	0	0	0
0	PC(44:5)+H	PC(44:5)+H	PC	(44:5)	(44:5)				892.679	C52 H95 O8 N1 P1	0	0	0	0	0	0	0	0	0	0	88325.4	0	0	0	0	0	0	0	0	0	0	0	0	0	0	0	0	0	0	2.47009e+07	0	0	0	0	0	0
0	PC(52:4)+H	PC(52:4)+H	PC	(52:4)	(52:4)				1006.82	C60 H113 O8 N1 P1	195169	0	1.11959e+07	0	7.23373e+06	0	7.56853e+06	0	0	0	7.9589e+06	0	0	0	0	0	0	7.73473e+06	0	0	0	0	0	0	0	0	0	0	0	0	0	0	0	0	0	0	1006.82		1006.82
0	PC(52:4)+H	PC(52:4)+H	PC	(52:4)	(52:4)				1006.82	C60 H113 O8 N1 P1	0	0	0	0	0	0	0	0	0	0	0	0	0	0	0	0	0	0	0	0	0	0	0	0	0	0	0	0	0	1.79087e+07	0	1.28003e+06	0	0	0	0
0	PC(52:5)+H	PC(52:5)+H	PC	(52:5)	(52:5)				1004.8	C60 H111 O8 N1 P1	0	0	9.65693e+06	0	5.46454e+06	0	6.48414e+06	0	0	0	5.4965e+06	0	0	0	0	0	0	1.37675e+07	0	0	0	0	0	0	0	0	0	0	0	0	0	0	0	0	0	0			1004.8
0	PC(52:5)+H	PC(52:5)+H	PC	(52:5)	(52:5)				1004.8	C60 H111 O8 N1 P1	0	0	0	0	0	0	0	0	0	0	0	0	0	0	0	0	0	0	0	0	0	552618	0	1.10441e+07	0	0	0	0	0	0	0	0	0	0	0	0
0	PC(52:6)+H	PC(52:6)+H	PC	(52:6)	(52:6)				1002.79	C60 H109 O8 N1 P1	0	0	5.56835e+06	0	4.64622e+06	0	3.63781e+06	0	0	0	4.99236e+06	0	0	0	0	409952	0	3.68478e+06	0	0	0	0	0	0	0	0	0	0	0	0	0	0	0	0	0	0			1002.79
0	PC(52:6)+H	PC(52:6)+H	PC	(52:6)	(52:6)				1002.79	C60 H109 O8 N1 P1	0	0	0	0	0	0	0	0	0	0	0	0	0	0	0	0	0	0	0	0	0	0	0	0	0	0	0	0	0	1.80291e+07	0	0	0	0	0	0
0	PC(54:6)+H	PC(54:6)+H	PC	(54:6)	(54:6)				1030.82	C62 H113 O8 N1 P1	0	0	0	0	0	0	0	0	0	0	0	0	0	0	0	0	0	0	0	0	0	0	0	0	0	0	0	0	0	2.70197e+07	0	0	0	0	0	0
0	PC(54:6)+H	PC(54:6)+H	PC	(54:6)	(54:6)				1030.82	C62 H113 O8 N1 P1	0	0	0	0	0	0	0	0	0	0	0	0	0	0	0	0	0	0	0	486536	0	344703	0	1.80397e+07	0	1.28907e+07	0	0	0	0	0	0	0	0	0	321561
0	PC(54:7)+H	PC(54:7)+H	PC	(54:7)	(54:7)				1028.8	C62 H111 O8 N1 P1	1.85958e+06	0	6.54941e+06	0	4.17498e+06	0	6.60922e+06	0	6418.5	0	4.12648e+06	0	0	0	0	0	0	1.65446e+07	0	0	0	0	0	0	0	0	0	0	0	0	0	0	0	0	0	0	1028.8		1028.8
0	PC(56:6)+H	PC(56:6)+H	PC	(56:6)	(56:6)				1058.85	C64 H117 O8 N1 P1	0	0	5.29307e+06	0	4.47871e+06	0	2.45171e+06	0	0	0	5.56736e+06	0	0	0	0	0	0	3.32091e+06	0	0	0	0	0	0	0	0	0	0	0	0	0	0	0	0	0	0			1058.85
0	PC(56:6)+H	PC(56:6)+H	PC	(56:6)	(56:6)				1058.85	C64 H117 O8 N1 P1	0	0	0	0	0	0	0	0	0	0	0	0	0	0	0	0	0	0	0	0	0	0	0	0	0	0	0	0	0	1.12529e+07	0	0	0	0	0	0
0	PE(16:0e)+H	PE(16:0e)+H	PE	(16:0e)	(16:0e)				454.293	C21 H45 O7 N1 P1	1.43324e+06	0	1.01936e+07	0	1.44205e+07	0	2.60856e+06	0	143277	0	45787.7	0	606870	0	0	513245	0	1.00761e+07	0	542959	0	557266	0	34447.2	0	908451	0	0	0	0	0	1.08186e+06	0	0	0	51194.7	454.293		454.293
0	PE(16:0e)+H	PE(16:0e)+H	PE	(16:0e)	(16:0e)				454.293	C21 H45 O7 N1 P1	93840.6	0	93503.5	0	54764.4	0	1396.35	0	0	0	0	0	76049.4	0	0	0	0	1190.52	0	1.49482e+06	0	0	0	0	0	0	0	0	0	9.6922e+06	0	8.2539e+06	0	60331.8	0	0	454.293		454.293
0	PE(16:0e)+H	PE(16:0e)+H	PE	(16:0e)	(16:0e)				454.293	C21 H45 O7 N1 P1	2.15568e+06	0	0	0	940.225	0	1322.7	0	40480.9	0	78949.3	0	379067	0	0	932.886	0	2527.01	0	0	0	0	0	0	0	0	0	0	0	4.10441e+07	0	3034.35	0	0	0	837327	454.293
0	PE(16:0e)+H	PE(16:0e)+H	PE	(16:0e)	(16:0e)				454.293	C21 H45 O7 N1 P1	3.26434e+06	0	3.44605e+06	0	1.08873e+06	92455.1	43335.2	0	1.19815e+06	0	861261	0	830331	0	0	1.45196e+06	0	42108.3	0	0	0	0	0	0	0	1.19119e+07	0	0	0	1.05633e+06	0	1.06426e+06	0	0	0	0	454.293		454.293
0	PE(16:0e)+H	PE(16:0e)+H	PE	(16:0e)	(16:0e)				454.293	C21 H45 O7 N1 P1	2.92922e+06	1.57182e+06	221343	59701	1.37634e+06	0	525677	0	339702	0	1.07375e+06	0	1.10207e+06	0	0	1.86897e+06	45164.3	1.33216e+06	0	1.55733e+07	0	2.61561e+07	0	4.39574e+07	0	142242	0	93327.7	18105.2	4.49103e+06	31303.6	5.37681e+06	0	0	0	247354	454.293	454.293	454.293
0	PE(16:0e)+H	PE(16:0e)+H	PE	(16:0e)	(16:0e)				454.293	C21 H45 O7 N1 P1	1.93104e+06	0	301048	0	1169.78	0	1187.52	0	1518.3	0	3718.52	0	1876.62	0	211707	362239	0	670933	0	0	0	0	76120.2	0	0	1.77689e+06	0	1.10563e+06	0	582659	0	119340	0	1.68116e+07	0	0	454.293		454.293
0	PE(18:0e)+H	PE(18:0e)+H	PE	(18:0e)	(18:0e)				482.324	C23 H49 O7 N1 P1	1.91673e+06	0	3.44366e+07	0	3.93224e+07	0	4.55179e+07	0	1.11316e+06	0	3.04004e+07	0	552739	0	0	1.27487e+06	0	5.85273e+07	0	0	0	0	0	0	0	0	31247.6	6.32358e+06	0	0	0	3.23207e+06	0	0	0	0	482.324		482.324
0	PE(18:0e)+H	PE(18:0e)+H	PE	(18:0e)	(18:0e)				482.324	C23 H49 O7 N1 P1	0	0	0	0	0	0	0	0	0	0	0	0	0	3108.28	0	0	0	0	0	0	0	0	0	0	0	0	0	0	0	0	0	2.21671e+07	0	0	0	0
0	PE(18:0e)+H	PE(18:0e)+H	PE	(18:0e)	(18:0e)				482.324	C23 H49 O7 N1 P1	0	0	0	0	0	0	0	297.753	0	0	0	0	0	0	0	0	0	0	0	0	0	0	0	167922	0	57016.8	0	0	0	9.02841e+07	0	0	0	0	0	0
0	PE(18:0e)+H	PE(18:0e)+H	PE	(18:0e)	(18:0e)				482.324	C23 H49 O7 N1 P1	0	281489	0	1314.18	0	0	0	0	0	0	0	0	0	0	0	0	0	0	0	0	0	25208	0	90047.7	0	0	0	2.58431e+06	32946.4	0	0	198499	0	0	0	1.47918e+06		482.324
0	PE(18:0e)+H	PE(18:0e)+H	PE	(18:0e)	(18:0e)				482.324	C23 H49 O7 N1 P1	0	0	0	0	0	0	0	0	0	0	0	0	0	0	44233.5	0	0	0	0	0	0	0	0	0	0	3.58778e+07	0	0	0	62192.9	0	0	0	0	0	0
0	PE(18:0e)+H	PE(18:0e)+H	PE	(18:0e)	(18:0e)				482.324	C23 H49 O7 N1 P1	0	0	0	0	0	36197.4	0	387100	0	61836.6	0	205241	0	0	0	0	0	0	0	3.62787e+07	0	5.45911e+07	0	1.05709e+08	0	0	0	2.47646e+06	1.86258e+06	0	2.3566e+06	0	0	0	0	202410
0	PE(18:0e)+H	PE(18:0e)+H	PE	(18:0e)	(18:0e)				482.324	C23 H49 O7 N1 P1	0	0	0	0	0	0	0	0	0	0	0	0	0	0	0	0	734517	0	0	0	0	0	0	0	0	0	0	0	0	0	0	0	20906.3	199.741	0	5.09681e+06
0	PE(18:0e)+H	PE(18:0e)+H	PE	(18:0e)	(18:0e)				482.324	C23 H49 O7 N1 P1	0	362640	0	0	0	30621	0	0	0	0	0	0	0	0	0	0	0	0	14749.2	0	0	0	828485	0	0	0	0	0	0	0	0	0	0	2.80492e+06	0	0		482.324
0	PE(18:0e)+H	PE(18:0e)+H	PE	(18:0e)	(18:0e)				482.324	C23 H49 O7 N1 P1	0	0	0	8.74628e+06	0	0	0	0	0	0	0	0	0	0	0	0	3.36222e+06	5865.46	0	0	0	0	592093	0	0	0	0	0	0	0	0	0	0	0	0	0
0	PE(18:0e)+H	PE(18:0e)+H	PE	(18:0e)	(18:0e)				482.324	C23 H49 O7 N1 P1	0	0	0	0	0	0	0	0	0	0	0	0	0	0	0	0	0	0	0	0	0	0	0	0	0	0	0	0	2.68897e+06	163839	0	0	0	0	0	0
0	PE(18:0e)+H	PE(18:0e)+H	PE	(18:0e)	(18:0e)				482.324	C23 H49 O7 N1 P1	0	0	0	0	0	0	0	0	3202.54	0	0	0	0	0	5.25474e+06	0	0	0	0	0	0	0	0	0	0	0	0	0	0	0	926080	0	0	0	0	0
0	PE(18:0p)+H	PE(18:0p)+H	PE	(18:0p)	(18:0p)				480.308	C23 H47 O7 N1 P1	7.08185e+06	0	1.07214e+07	0	5.16438e+07	0	3.58588e+07	0	888155	0	8.19588e+06	0	538307	0	0	141294	0	7.05739e+07	0	1.94526e+06	0	6.3912e+06	0	3.56384e+06	0	4.12931e+06	0	0	0	53052.4	0	3.99749e+06	0	15548.9	0	57199.5	480.308		480.308
1	PE(18:0p)+H	PE(18:0p)+H	PE	(18:0p)	(18:0p)				480.308	C23 H47 O7 N1 P1	6.04109e+06	0	9.56428e+06	0	1.77579e+07	0	120669	0	1261.92	0	2.17868e+06	0	40294.2	0	0	317502	0	2.28541e+07	0	45489.1	0	6.42017e+06	0	1.26373e+06	0	0	0	0	0	0	0	4.03877e+06	0	36720	0	0	480.308		480.308
0	PE(18:0p)+H	PE(18:0p)+H	PE	(18:0p)	(18:0p)				480.308	C23 H47 O7 N1 P1	0	0	42958.2	0	23361.4	0	41948.2	0	24546	0	17183.3	23848.7	28561.2	47496.7	0	23135.2	0	151635	0	0	0	0	0	0	0	0	9671.42	0	0	8.25264e+07	0	1.93731e+07	0	0	0	2.43001e+06
0	PE(18:0p)+H	PE(18:0p)+H	PE	(18:0p)	(18:0p)				480.308	C23 H47 O7 N1 P1	0	0	0	0	1641.08	0	0	77696.7	0	0	0	31673	0	0	0	0	0	0	0	0	0	0	0	0	0	0	0	1.44659e+07	0	1375.6	0	0	0	0	0	0
0	PE(18:0p)+H	PE(18:0p)+H	PE	(18:0p)	(18:0p)				480.308	C23 H47 O7 N1 P1	0	0	0	0	0	0	0	157.175	0	0	696.095	0	0	0	0	0	0	0	0	0	0	517.458	0	0	0	2.4249e+07	0	663.257	0	0	0	0	0	0	0	0
0	PE(18:0p)+H	PE(18:0p)+H	PE	(18:0p)	(18:0p)				480.308	C23 H47 O7 N1 P1	0	166984	35058.6	126374	0	0	72950.6	0	0	0	0	0	0	0	0	0	0	0	0	4.73785e+07	0	1.13001e+08	0	1.45238e+08	0	49738.7	0	0	19924.3	0	0	94766.7	0	0	0	381044		480.308	480.308
0	PE(18:0p)+H	PE(18:0p)+H	PE	(18:0p)	(18:0p)				480.308	C23 H47 O7 N1 P1	0	0	0	0	0	0	0	186722	0	0	0	0	0	0	99514.6	0	0	0	0	0	0	0	0	0	0	0	0	0	0	1036.96	0	0	0	228864	0	3.73568e+06
0	PE(18:0p)+H	PE(18:0p)+H	PE	(18:0p)	(18:0p)				480.308	C23 H47 O7 N1 P1	0	0	0	0	0	0	0	0	0	0	0	0	0	0	544.373	1377.84	0	0	0	0	0	807.114	0	0	0	0	0	0	1111.67	0	0	1167.4	0	5.1879e+07	0	0
0	PE(18:0p)+H	PE(18:0p)+H	PE	(18:0p)	(18:0p)				480.308	C23 H47 O7 N1 P1	0	0	0	0	0	21323.7	0	0	0	0	0	502.693	0	0	0	0	0	0	0	0	0	619666	0	0	0	0	0	0	0	1.86333e+06	0	0	5.96589e+06	0	0	0
0	PE(19:1)+H	PE(19:1)+H	PE	(19:1)	(19:1)				508.303	C24 H47 O8 N1 P1	1.33495e+06	0	287228	0	1.30942e+06	8152.52	0	0	391687	0	1.51686e+07	0	0	0	0	9688.41	0	2.71777e+07	0	0	0	0	0	0	0	0	0	0	0	0	0	0	0	0	0	36383.1	508.303
0	PE(19:1)+H	PE(19:1)+H	PE	(19:1)	(19:1)				508.303	C24 H47 O8 N1 P1	0	549.304	0	0	0	0	0	0	0	0	0	0	0	143951	0	0	0	0	0	0	0	0	0	0	0	7.46398e+06	0	0	0	0	0	0	0	0	364.882	0		508.303
0	PE(20:0e)+H	PE(20:0e)+H	PE	(20:0e)	(20:0e)				510.355	C25 H53 O7 N1 P1	0	0	72251.2	0	1.84767e+06	43517.3	0	47261.8	0	211017	171102	0	0	0	0	0	0	0	0	0	0	0	0	0	0	0	0	0	0	0	0	213184	0	0	0	0			510.355
0	PE(20:0p)+H	PE(20:0p)+H	PE	(20:0p)	(20:0p)				508.34	C25 H51 O7 N1 P1	6.00997e+06	0	2.6509e+06	0	1.41083e+07	0	8.68055e+06	0	313150	0	5.66998e+06	0	514904	0	0	0	0	2.23142e+07	0	0	0	0	0	0	0	999787	0	0	0	0	0	0	0	0	0	0	508.34		508.34
0	PE(20:0p)+H	PE(20:0p)+H	PE	(20:0p)	(20:0p)				508.34	C25 H51 O7 N1 P1	0	0	0	0	0	0	0	0	0	0	0	0	0	0	0	0	0	0	0	1.08514e+06	0	0	0	0	0	0	0	0	0	3.53504e+07	0	0	0	0	0	0
0	PE(20:0p)+H	PE(20:0p)+H	PE	(20:0p)	(20:0p)				508.34	C25 H51 O7 N1 P1	0	0	0	0	0	0	626.383	0	0	0	0	0	0	0	0	0	0	0	0	0	0	2489.73	0	0	0	0	0	3.80055e+06	0	1.35457e+07	0	0	0	0	0	0
0	PE(20:0p)+H	PE(20:0p)+H	PE	(20:0p)	(20:0p)				508.34	C25 H51 O7 N1 P1	0	0	0	0	0	0	0	0	0	0	0	0	0	0	0	0	0	0	0	0	0	0	0	0	0	6.63715e+06	0	0	0	0	0	36639.3	0	0	0	0
0	PE(20:0p)+H	PE(20:0p)+H	PE	(20:0p)	(20:0p)				508.34	C25 H51 O7 N1 P1	0	0	0	0	0	0	0	0	0	0	0	0	0	0	0	37829.9	339248	80803.8	0	1.28151e+07	0	3.8741e+07	0	4.05287e+07	0	2.2264e+06	0	0	0	0	0	0	0	0	0	0
0	PE(20:0p)+H	PE(20:0p)+H	PE	(20:0p)	(20:0p)				508.34	C25 H51 O7 N1 P1	0	0	0	0	0	0	0	0	0	0	0	0	0	0	0	0	0	0	0	0	0	1.53413e+07	0	1.35032e+07	0	0	0	136102	36731.5	0	0	0	0	677731	0	0
0	PE(20:0p)+H	PE(20:0p)+H	PE	(20:0p)	(20:0p)				508.34	C25 H51 O7 N1 P1	0	0	0	4.3128e+06	0	0	0	0	70348.8	0	0	0	0	0	0	0	547878	0	0	0	0	0	0	0	0	0	0	0	0	0	0	0	0	0	1371.23	0
0	PE(20:3e)+H	PE(20:3e)+H	PE	(20:3e)	(20:3e)				504.308	C25 H47 O7 N1 P1	0	2185.38	454.265	13207.2	1135.93	68737	114332	320467	743.029	29309.1	23228.7	60641	18780.2	0	0	32903.1	0	484.926	0	34613.5	0	65207.3	0	0	0	0	42391.7	0	5781.7	3.28847e+06	0	24078.6	0	23798.5	0	57880.4			504.308
0	PE(20:3e)+H	PE(20:3e)+H	PE	(20:3e)	(20:3e)				504.308	C25 H47 O7 N1 P1	937.142	0	8224.52	0	2.41417e+06	529.959	1.04383e+06	0	32439.8	0	2.30776e+06	12311.2	0	0	16946.6	35002.5	0	69008.8	478.241	0	254.212	0	0	0	0	893.829	17344.7	0	74483.2	0	599.419	0	0	0	11206.9	0	504.308		504.308
0	PE(20:3e)+H	PE(20:3e)+H	PE	(20:3e)	(20:3e)				504.308	C25 H47 O7 N1 P1	2141.47	0	343.783	0	93007.4	152269	121156	146946	598.105	406431	95329.3	0	2244.57	35725.2	0	0	55459.7	150877	0	202300	0	3.41101e+06	0	6.61298e+06	9554.16	1320.78	155.944	0	0	0	8675.95	62026.4	0	0	0	0	504.308		504.308
0	PE(20:3e)+H	PE(20:3e)+H	PE	(20:3e)	(20:3e)				504.308	C25 H47 O7 N1 P1	30943	23872.4	397.874	54125.6	0	319.507	37667.2	1147.65	928.81	0	0	0	905.273	246.186	109243	103752	171606	1374.46	9588.35	0	0	0	11890.1	0	0	6.93271e+06	0	0	16212.5	0	11562.9	0	0	3212.54	7278.73	40336.5	504.308	504.308	504.308
0	PE(20:3e)+H	PE(20:3e)+H	PE	(20:3e)	(20:3e)				504.308	C25 H47 O7 N1 P1	45491.4	42265.9	51079.1	15312.8	394.887	0	1124.36	0	63563.7	0	36879.5	0	62466.8	13731.2	37604.6	0	0	0	0	4.20582e+06	26048.5	8.00711e+06	33594.4	8.08539e+06	9717.34	0	0	647497	4.6592e+06	0	2.46874e+06	0	0	83686.4	29020.2	0	504.308	504.308	504.308
0	PE(20:3e)+H	PE(20:3e)+H	PE	(20:3e)	(20:3e)				504.308	C25 H47 O7 N1 P1	941.405	0	0	0	0	0	0	0	111974	243.411	0	0	1315.7	0	26916.9	0	0	0	6821.35	1379.73	525.258	0	4.25041e+06	0	287.295	0	28372.4	0	10868.6	0	7597.17	0	0	966739	0	0	504.308
0	PE(20:4e)+H	PE(20:4e)+H	PE	(20:4e)	(20:4e)				502.293	C25 H45 O7 N1 P1	9.57976e+06	10344.3	1.48179e+07	0	2.67497e+07	0	3.68805e+07	0	776230	0	2.47854e+06	0	584198	33688	0	734751	7706.8	7.62635e+07	0	150537	0	220423	0	196734	0	0	0	57393.9	0	0	79971.8	0	0	49301.5	0	135027	502.293	502.293	502.293
0	PE(20:4e)+H	PE(20:4e)+H	PE	(20:4e)	(20:4e)				502.293	C25 H45 O7 N1 P1	0	17717.9	0	0	0	0	0	0	19848.9	0	550.935	0	0	0	0	0	0	0	156.144	0	0	0	0	0	0	4.34115e+06	0	48127.1	0	8.76825e+06	0	1005.57	0	62095.6	0	0		502.293
0	PE(20:4e)+H	PE(20:4e)+H	PE	(20:4e)	(20:4e)				502.293	C25 H45 O7 N1 P1	0	186071	0	81022.2	0	10639.2	32588.8	50881.3	52384.8	0	78450.2	0	15781.9	27146.1	0	45168.4	77845.2	0	13283.6	4.921e+06	42289.9	1.34287e+07	0	1.58769e+07	0	42205.3	22751.4	46978.4	22800.9	62184	0	91267	0	1.7935e+07	0	90390.9		502.293
0	PE(20:4e)+H	PE(20:4e)+H	PE	(20:4e)	(20:4e)				502.293	C25 H45 O7 N1 P1	0	0	0	0	0	373671	0	0	0	1024.39	0	0	0	6744.23	348000	0	0	0	0	0	0	2877.04	0	2170.49	0	2466.85	0	0	0	0	0	0	22817.7	6.24667e+06	0	0
0	PE(21:1)+H	PE(21:1)+H	PE	(21:1)	(21:1)				536.335	C26 H51 O8 N1 P1	3188.08	0	0	0	468765	0	0	0	108618	0	5.39241e+06	27989	0	0	0	694.714	0	8.08856e+06	0	0	0	0	0	0	0	8811.99	0	0	0	0	0	0	0	0	0	0	536.335
0	PE(21:4)+H	PE(21:4)+H	PE	(21:4)	(21:4)				530.288	C26 H45 O8 N1 P1	0	0	34410.7	0	0	0	0	0	0	0	0	0	0	0	0	0	0	0	0	0	0	0	0	0	0	6.04773e+06	0	0	0	0	0	0	0	0	0	0			530.288
0	PE(22:4e)+H	PE(22:4e)+H	PE	(22:4e)	(22:4e)				530.324	C27 H49 O7 N1 P1	1.18359e+07	2683.41	6.08204e+06	0	1.90766e+07	0	1.15179e+07	0	266957	0	6.07067e+06	0	47179.2	0	31004	0	0	3.34992e+07	0	94937.5	0	40022.7	0	41678.5	0	0	0	0	0	0	0	63482.8	0	58022.8	0	37548.6	530.324		530.324
0	PE(22:4e)+H	PE(22:4e)+H	PE	(22:4e)	(22:4e)				530.324	C27 H49 O7 N1 P1	0	11066.8	30092.8	0	18435.9	31493.7	14698.9	0	53623.1	12248.2	44948.9	0	30427.8	14116.8	0	71725.3	0	0	0	0	0	0	6181.93	0	0	51518	0	0	11197.9	2.78465e+07	0	1.22387e+07	0	38096.8	0	0		530.324	530.324
0	PE(22:4e)+H	PE(22:4e)+H	PE	(22:4e)	(22:4e)				530.324	C27 H49 O7 N1 P1	0	0	0	0	0	0	0	0	0	0	0	0	0	0	0	0	0	0	0	0	0	0	0	0	0	0	0	6.13127e+06	0	8032.36	0	0	0	0	0	0
0	PE(22:4e)+H	PE(22:4e)+H	PE	(22:4e)	(22:4e)				530.324	C27 H49 O7 N1 P1	0	0	0	456.565	0	0	0	516.789	943.25	0	1091.99	0	0	42.332	0	0	0	0	15724.9	0	0	0	0	0	0	1.11877e+07	0	43342.9	0	0	7252.98	0	0	10117.2	0	26239
0	PE(22:4e)+H	PE(22:4e)+H	PE	(22:4e)	(22:4e)				530.324	C27 H49 O7 N1 P1	0	20478.5	0	75747.1	49552	27407.5	0	29877.1	0	0	125211	0	94340.9	0	0	58737	23195.4	0	0	2.18137e+07	0	3.67479e+07	0	5.09306e+07	0	37249	0	107588	24719.9	0	11730.4	0	0	52812.2	0	0		530.324
0	PE(22:4e)+H	PE(22:4e)+H	PE	(22:4e)	(22:4e)				530.324	C27 H49 O7 N1 P1	0	70645.1	0	358403	0	0	0	0	144.766	0	0	355.805	24280.2	0	10189.9	0	141532	0	0	0	0	49.74	0	0	0	32236.3	0	0	0	0	0	0	0	0	0	5.54221e+06		530.324
0	PE(22:4e)+H	PE(22:4e)+H	PE	(22:4e)	(22:4e)				530.324	C27 H49 O7 N1 P1	2511.03	14599.9	0	0	0	22701.7	0	0	473.18	0	0	0	0	0	26788.5	1577.5	1464.45	40137.3	0	0	0	0	0	100840	0	0	0	0	0	36519.6	0	0	0	3.0143e+07	1425.93	0	530.324	530.324
0	PE(22:4e)+H	PE(22:4e)+H	PE	(22:4e)	(22:4e)				530.324	C27 H49 O7 N1 P1	0	0	0	0	0	0	0	0	0	0	0	0	0	0	0	0	0	0	0	0	0	0	0	0	0	0	0	0	1.77463e+06	0	30124.5	0	62390.4	0	0	0
0	PE(22:4e)+H	PE(22:4e)+H	PE	(22:4e)	(22:4e)				530.324	C27 H49 O7 N1 P1	0	0	0	0	0	0	0	0	0	0	0	0	0	0	0	0	0	0	0	0	0	0	0	0	0	0	0	0	0	0	0	0	938820	0	0	0
0	PE(23:4)+H	PE(23:4)+H	PE	(23:4)	(23:4)				558.319	C28 H49 O8 N1 P1	278085	0	0	0	0	0	0	0	0	0	5.667e+06	0	0	0	0	0	0	1.31077e+07	0	0	0	0	0	0	0	0	0	0	0	0	0	0	0	0	13396.5	0	558.319
0	PE(23:4)+H	PE(23:4)+H	PE	(23:4)	(23:4)				558.319	C28 H49 O8 N1 P1	0	0	0	0	0	0	0	0	49823.1	0	0	0	0	0	0	0	0	0	0	0	0	0	0	0	0	3.19186e+06	0	0	0	0	0	0	0	0	0	0
0	PE(16:0/16:0)+H	PE(32:0)+H	PE	(16:0/16:0)	(16:0)	(16:0)			692.522	C37 H75 O8 N1 P1	270402	0	2.38718e+07	0	1.75535e+06	0	2.21512e+06	0	279098	0	2.52442e+07	54826.4	0	54118.6	93883.6	161540	0	9.71885e+06	0	0	0	0	385708	0	100723	0	0	0	0	35182.7	0	400192	0	0	0	0	692.522		692.522
0	PE(16:0/16:0)+H	PE(32:0)+H	PE	(16:0/16:0)	(16:0)	(16:0)			692.522	C37 H75 O8 N1 P1	122368	0	1.49693e+06	0	2716751	0	4.75694e+06	0	3735.63	0	4.51749e+06	0	0	0	43801.2	321511	0	3.86182e+07	5416.53	0	0	0	48532	0	35341.8	0	5616	0	0	0	0	2262.63	0	0	0	0	692.522		692.522
0	PE(16:0/16:0)-H	PE(32:0)-H	PE	(16:0/16:0)	(16:0)	(16:0)			690.508	C37 H73 O8 N1 P1	1792.96	0	1.80953e+06	0	102382	0	0	0	0	0	272674	0	0	0	0	0	0	8.84915e+06	0	0	0	0	0	0	0	0	0	0	0	0	0	0	0	0	0	0	690.508		690.508
0	PE(16:0/16:0)+H	PE(32:0)+H	PE	(16:0/16:0)	(16:0)	(16:0)			692.522	C37 H75 O8 N1 P1	0	0	0	0	0	0	116806	0	0	0	0	0	0	0	0	0	0	1.0165e+06	0	0	0	0	0	0	0	0	0	0	0	0	0	4.00034e+06	0	0	102425	0
0	PE(16:0/16:0)+H	PE(32:0)+H	PE	(16:0/16:0)	(16:0)	(16:0)			692.522	C37 H75 O8 N1 P1	83562.2	0	2.05511e+06	0	402307	0	1.64001e+06	0	72971.8	0	211304	0	0	0	0	61926.5	0	650133	0	220690	0	149259	0	0	0	547135	0	301790	0	4.27583e+07	0	145357	366557	0	0	0	692.522		692.522
0	PE(16:0/16:0)-H	PE(32:0)-H	PE	(16:0/16:0)	(16:0)	(16:0)			690.508	C37 H73 O8 N1 P1	0	0	0	0	0	0	0	0	0	0	0	0	0	0	0	0	0	0	0	0	0	0	0	0	0	0	0	0	0	7.94021e+06	0	0	0	0	0	0
0	PE(16:0/16:0)-H	PE(32:0)-H	PE	(16:0/16:0)	(16:0)	(16:0)			690.508	C37 H73 O8 N1 P1	0	0	0	0	0	0	0	0	0	0	0	0	0	0	0	0	0	0	0	0	0	0	0	0	0	6.02286e+06	0	0	0	0	0	0	0	0	0	0
0	PE(16:0/16:0)+H	PE(32:0)+H	PE	(16:0/16:0)	(16:0)	(16:0)			692.522	C37 H75 O8 N1 P1	0	0	2555.78	0	0	0	0	0	0	0	5360.61	33445.3	0	0	0	0	0	6845.12	0	0	0	0	0	0	0	2.16601e+07	0	1.85333e+06	0	798723	0	0	0	0	0	2937.39			692.522
0	PE(16:0/16:0)+H	PE(32:0)+H	PE	(16:0/16:0)	(16:0)	(16:0)			692.522	C37 H75 O8 N1 P1	0	0	324842	0	251443	0	0	0	0	0	0	0	0	0	0	0	0	0	0	0	0	2.13053e+07	0	2.30549e+07	0	739827	0	0	0	776000	0	0	0	2215.38	0	0			692.522
0	PE(16:0/16:0)-H	PE(32:0)-H	PE	(16:0/16:0)	(16:0)	(16:0)			690.508	C37 H73 O8 N1 P1	0	0	0	0	0	0	0	0	0	0	0	0	0	0	0	0	0	0	0	0	0	3.38407e+06	0	5.76683e+06	0	0	0	0	0	0	0	0	0	0	0	0
0	PE(16:0p/16:0)-H	PE(32:0p)-H	PE	(16:0p/16:0)	(16:0p)	(16:0)			674.513	C37 H73 O7 N1 P1	2576.53	0	1.65428e+07	0	9.74346e+06	0	1.47379e+07	0	89576.8	0	1.1706e+07	0	0	0	0	0	0	1.25594e+07	0	0	0	0	0	0	0	0	0	0	0	0	0	0	0	0	0	0	674.513		674.514
0	PE(16:0p/16:0)+H	PE(32:0p)+H	PE	(16:0p/16:0)	(16:0p)	(16:0)			676.528	C37 H75 O7 N1 P1	212087	0	2.42868e+07	0	1.7799e+07	0	1.99086e+07	0	142922	0	1.7338e+07	0	0	0	0	0	0	3.59443e+07	0	0	0	0	0	0	0	0	0	61450.7	0	0	0	0	0	0	0	0	676.528		676.527
0	PE(16:0p/16:0)-H	PE(32:0p)-H	PE	(16:0p/16:0)	(16:0p)	(16:0)			674.513	C37 H73 O7 N1 P1	0	0	0	0	0	0	0	0	0	0	0	0	0	0	0	0	0	0	0	0	0	0	0	0	0	0	0	0	0	0	0	2.80688e+06	0	0	0	0
0	PE(16:0p/16:0)+H	PE(32:0p)+H	PE	(16:0p/16:0)	(16:0p)	(16:0)			676.528	C37 H75 O7 N1 P1	0	0	0	0	0	0	0	0	0	0	0	0	0	0	0	0	0	0	0	0	0	0	0	0	469.988	0	0	0	0	0	0	5.9014e+06	0	0	0	0
0	PE(16:0p/16:0)-H	PE(32:0p)-H	PE	(16:0p/16:0)	(16:0p)	(16:0)			674.513	C37 H73 O7 N1 P1	0	0	0	0	0	0	0	0	0	0	0	0	0	0	0	0	0	0	0	0	0	0	0	0	0	0	0	0	0	1.7826e+07	0	0	0	0	0	0
0	PE(16:0p/16:0)+H	PE(32:0p)+H	PE	(16:0p/16:0)	(16:0p)	(16:0)			676.528	C37 H75 O7 N1 P1	0	0	0	0	0	0	0	0	0	0	0	0	0	0	0	0	0	0	0	0	0	0	0	0	0	0	0	0	0	4.50041e+07	0	0	0	0	0	0
0	PE(16:0p/16:0)-H	PE(32:0p)-H	PE	(16:0p/16:0)	(16:0p)	(16:0)			674.513	C37 H73 O7 N1 P1	0	0	0	0	0	0	0	0	0	0	0	0	0	0	0	0	0	0	0	0	0	2606.29	0	0	0	1.15905e+07	0	0	0	0	0	0	0	0	0	0
0	PE(16:0p/16:0)+H	PE(32:0p)+H	PE	(16:0p/16:0)	(16:0p)	(16:0)			676.528	C37 H75 O7 N1 P1	0	0	0	0	0	0	0	0	0	0	0	0	0	0	0	0	0	0	0	0	0	8096.19	0	11217.1	0	2.88748e+07	0	0	0	0	0	0	0	0	0	0
0	PE(16:0p/16:0)-H	PE(32:0p)-H	PE	(16:0p/16:0)	(16:0p)	(16:0)			674.513	C37 H73 O7 N1 P1	0	0	0	0	0	0	0	0	0	0	0	0	0	0	0	0	0	0	0	5.10936e+06	0	5.55325e+06	0	1.16185e+07	0	0	0	0	10355.8	0	0	0	0	0	0	0
0	PE(16:0p/16:0)+H	PE(32:0p)+H	PE	(16:0p/16:0)	(16:0p)	(16:0)			676.528	C37 H75 O7 N1 P1	0	0	0	0	0	0	0	0	0	0	0	0	0	0	0	0	0	0	0	2.21893e+07	0	2.46503e+07	0	4.07037e+07	0	0	0	0	0	0	0	0	0	0	0	0
0	PE(16:0/16:1)+H	PE(32:1)+H	PE	(16:0/16:1)	(16:0)	(16:1)			690.507	C37 H73 O8 N1 P1	0	0	1.75849e+07	0	1.02874e+07	0	1.28789e+07	0	704177	0	1.39825e+07	151046	0	0	0	3138.12	0	2.95203e+07	334934	0	83848.9	0	4.41917e+06	0	209329	0	139801	0	173614	0	291949	0	0	2584.05	0	0			690.506
0	PE(16:0/16:1)-H	PE(32:1)-H	PE	(16:0/16:1)	(16:0)	(16:1)			688.492	C37 H71 O8 N1 P1	0	0	2.08528e+06	0	145556	0	0	0	0	0	107815	0	0	0	0	0	0	6.09726e+06	0	0	0	0	0	0	0	0	0	0	0	0	0	0	0	0	0	0			688.492
0	PE(16:0/16:1)+H	PE(32:1)+H	PE	(16:0/16:1)	(16:0)	(16:1)			690.507	C37 H73 O8 N1 P1	0	0	0	0	0	0	0	0	0	0	0	0	0	0	44921.4	0	0	0	72475.3	114751	0	0	0	0	2883.09	0	755125	0	0	0	0	1.25814e+07	0	0	1455.34	0
0	PE(16:0/16:1)+H	PE(32:1)+H	PE	(16:0/16:1)	(16:0)	(16:1)			690.507	C37 H73 O8 N1 P1	0	0	0	0	0	0	0	0	0	0	0	0	0	0	0	0	0	0	0	0	0	0	425434	0	3724.94	0	0	0	0	4.38863e+07	1744.97	0	3523.05	0	0	0
0	PE(16:0/16:1)-H	PE(32:1)-H	PE	(16:0/16:1)	(16:0)	(16:1)			688.492	C37 H71 O8 N1 P1	0	0	0	0	0	0	0	0	0	0	0	0	0	0	0	0	0	0	0	0	0	0	0	0	0	0	0	0	0	2.34011e+06	0	0	0	0	0	0
0	PE(16:0/16:1)+H	PE(32:1)+H	PE	(16:0/16:1)	(16:0)	(16:1)			690.507	C37 H73 O8 N1 P1	0	0	0	0	0	0	0	0	0	0	0	0	0	0	17693.6	0	0	0	0	0	0	0	0	0	0	1.81695e+06	0	0	0	0	1083.99	319331	0	0	0	0
0	PE(16:0/16:1)+H	PE(32:1)+H	PE	(16:0/16:1)	(16:0)	(16:1)			690.507	C37 H73 O8 N1 P1	0	0	0	0	0	0	0	0	0	0	0	4470.56	0	0	0	0	0	0	0	0	0	5.58295e+06	924.345	1.01191e+07	0	0	0	0	0	0	0	0	0	0	0	0
0	PE(16:0/16:1)-H	PE(32:1)-H	PE	(16:0/16:1)	(16:0)	(16:1)			688.492	C37 H71 O8 N1 P1	0	0	0	0	0	0	0	0	0	0	0	0	0	0	0	0	0	0	0	0	0	1.46802e+06	0	3.71967e+06	0	0	0	0	0	0	0	0	0	0	0	0
0	PE(18:1p/14:0)-H	PE(32:1p)-H	PE	(18:1p/14:0)	(18:1p)	(14:0)			672.497	C37 H71 O7 N1 P1	0	0	4.90905e+06	0	3722.53	0	4.98907e+06	0	0	0	4.95805e+06	0	0	0	0	0	0	7.24005e+06	0	0	0	0	0	0	0	0	0	0	0	0	0	0	0	0	0	0			672.496
0	PE(18:1p/14:0)+H	PE(32:1p)+H	PE	(18:1p/14:0)	(18:1p)	(14:0)			674.512	C37 H73 O7 N1 P1	0	0	7.22146e+06	0	1.07077e+07	0	9.66556e+06	0	0	0	7.60613e+06	0	0	0	756791	0	0	1.67898e+07	47046.4	0	85263.3	0	0	0	17067.9	0	162608	0	76049.8	0	96915.9	0	0	62468.5	0	0			674.511
0	PE(18:1p/14:0)+H	PE(32:1p)+H	PE	(18:1p/14:0)	(18:1p)	(14:0)			674.512	C37 H73 O7 N1 P1	0	0	0	0	0	0	0	0	0	0	0	0	0	0	0	0	0	0	0	0	0	0	34492.4	0	0	0	0	0	0	2.54834e+07	0	0	0	0	0	0
0	PE(18:1p/14:0)-H	PE(32:1p)-H	PE	(18:1p/14:0)	(18:1p)	(14:0)			672.497	C37 H71 O7 N1 P1	0	0	0	0	0	0	0	0	0	0	0	0	0	0	0	0	0	0	0	0	0	0	0	0	0	0	0	0	0	9.19268e+06	0	2380.58	0	0	0	0
0	PE(16:0p/16:1)-H	PE(32:1p)-H	PE	(16:0p/16:1)	(16:0p)	(16:1)			672.497	C37 H71 O7 N1 P1	0	0	0	0	0	0	0	0	0	0	0	0	0	0	0	0	0	0	0	0	0	0	0	0	0	3.30465e+06	0	0	0	0	0	0	0	0	0	0
0	PE(16:0p/16:1)+H	PE(32:1p)+H	PE	(16:0p/16:1)	(16:0p)	(16:1)			674.512	C37 H73 O7 N1 P1	0	0	0	0	0	0	0	0	0	0	0	0	0	0	0	0	0	0	0	0	0	0	0	0	0	6.06923e+06	0	0	0	0	0	0	116957	0	0	0
0	PE(18:1p/14:0)-H	PE(32:1p)-H	PE	(18:1p/14:0)	(18:1p)	(14:0)			672.497	C37 H71 O7 N1 P1	0	0	0	0	0	0	0	0	0	0	0	0	0	0	0	0	0	0	0	0	0	4.52269e+06	0	1.29898e+07	0	0	0	0	0	0	0	0	0	0	0	0
0	PE(18:1p/14:0)+H	PE(32:1p)+H	PE	(18:1p/14:0)	(18:1p)	(14:0)			674.512	C37 H73 O7 N1 P1	0	0	0	0	0	0	0	0	0	0	0	0	0	0	0	0	0	0	0	0	0	5.04657e+07	0	5.4879e+07	0	0	0	0	0	0	0	0	0	0	0	0
0	PE(16:0p/17:1)+H	PE(33:1p)+H	PE	(16:0p/17:1)	(16:0p)	(17:1)			688.528	C38 H75 O7 N1 P1	0	0	0	0	0	0	0	0	0	0	0	0	0	0	0	0	0	0	0	0	0	0	0	0	0	0	0	0	0	1.96389e+06	0	0	0	0	0	0
0	PE(18:0/16:0)+H	PE(34:0)+H	PE	(18:0/16:0)	(18:0)	(16:0)			720.554	C39 H79 O8 N1 P1	162818	0	3.44361e+07	0	3.25893e+07	0	2.79455e+07	0	2.35002e+06	0	2.67316e+07	54381.6	167471	0	0	7.22858e+06	0	3.14121e+07	0	384156	74455.6	106240	34497.6	0	151899	119376	360063	97768.7	14080.2	3.81906e+08	0	3.44018e+06	0	26682.5	0	0	720.554		720.553
0	PE(18:0/16:0)-H	PE(34:0)-H	PE	(18:0/16:0)	(18:0)	(16:0)			718.539	C39 H77 O8 N1 P1	384165	0	1.22121e+07	0	1.01965e+07	0	13136.9	0	158757	0	1.5312e+07	0	0	0	0	76098	0	2.33684e+07	0	0	0	0	0	0	0	0	0	0	0	8.2797e+06	0	0	0	0	0	0	718.539		718.54
0	PE(18:0/16:0)+H	PE(34:0)+H	PE	(18:0/16:0)	(18:0)	(16:0)			720.554	C39 H79 O8 N1 P1	0	0	1.41068e+06	0	37187	0	970464	0	0	0	445297	0	0	0	0	67888.8	0	2072.92	0	0	0	0	0	0	0	0	0	0	0	268343	0	8.8036e+06	0	0	0	111752			720.554
0	PE(18:0/16:0)-H	PE(34:0)-H	PE	(18:0/16:0)	(18:0)	(16:0)			718.539	C39 H77 O8 N1 P1	0	0	0	0	0	0	0	0	0	0	0	0	0	0	0	0	0	0	0	0	0	0	0	0	0	0	0	0	0	0	0	5.16828e+06	0	0	0	0
0	PE(18:0/16:0)-H	PE(34:0)-H	PE	(18:0/16:0)	(18:0)	(16:0)			718.539	C39 H77 O8 N1 P1	0	0	0	0	0	0	0	0	0	0	0	0	0	0	0	0	0	0	0	0	0	0	0	0	0	0	0	0	0	2.54743e+07	0	0	0	0	0	0
0	PE(34:0)+H	PE(34:0)+H	PE	(18:0/16:0)	(18:0)	(16:0)			720.554	C39 H79 O8 N1 P1	91125.6	0	5.14422e+06	0	2.03366e+06	0	2.43536e+06	0	208275	0	218823	0	0	0	0	405501	0	3.30657e+06	0	184327	0	531879	0	253770	0	1.06197e+06	0	9.55567e+06	0	8.02777e+07	0	237070	27918.2	0	0	133785	720.554		720.554
0	PE(34:0)+H	PE(34:0)+H	PE	(34:0)	(34:0)				720.554	C39 H79 O8 N1 P1	0	0	2.65932e+06	0	658309	0	375985	0	0	0	379426	0	0	0	0	0	0	1.08877e+06	0	521229	0	1.90048e+06	0	3.28205e+06	0	2.13981e+07	0	3.34167e+07	0	4.69616e+06	0	266199	0	0	0	107877			720.554
0	PE(18:0/16:0)+H	PE(34:0)+H	PE	(18:0/16:0)	(18:0)	(16:0)			720.554	C39 H79 O8 N1 P1	0	0	303891	0	318753	0	0	0	0	0	0	0	0	0	0	0	0	7947.52	0	4.80552e+06	0	8.12132e+06	0	3.4766e+07	0	6.16534e+07	0	825077	0	2.37022e+06	0	0	0	0	0	3042.86			720.554
0	PE(18:0/16:0)-H	PE(34:0)-H	PE	(18:0/16:0)	(18:0)	(16:0)			718.539	C39 H77 O8 N1 P1	0	0	0	0	0	0	0	0	0	0	0	0	0	0	0	0	0	0	0	0	0	4.10877e+06	0	7.55149e+06	0	1.2918e+07	0	0	0	0	0	0	0	0	0	0
0	PE(18:0/16:0)+H	PE(34:0)+H	PE	(18:0/16:0)	(18:0)	(16:0)			720.554	C39 H79 O8 N1 P1	0	0	1.83455e+06	0	464719	0	562223	0	0	0	119324	0	0	0	88740.4	0	0	1.20079e+06	0	4.90831e+07	0	5.6525e+07	37914.1	7.59636e+07	0	4.17081e+06	0	5.63433e+06	119082	3.34896e+07	0	0	0	1.32842e+07	0	516541			720.554
0	PE(18:0/16:0)-H	PE(34:0)-H	PE	(18:0/16:0)	(18:0)	(16:0)			718.539	C39 H77 O8 N1 P1	0	0	0	0	0	0	0	0	0	0	0	0	0	0	0	0	0	0	0	5.71216e+06	0	7.12241e+06	0	1.62927e+07	0	0	0	0	0	0	0	0	0	0	0	509393
0	PE(18:0e/16:0)-H	PE(34:0e)-H	PE	(18:0e/16:0)	(18:0e)	(16:0)			704.56	C39 H79 O7 N1 P1	0	0	3.18007e+06	0	2.65458e+06	0	3.57013e+06	0	0	0	2.94529e+06	0	0	0	0	0	0	1.38524e+06	0	0	0	0	0	0	0	0	0	0	0	0	0	571905	0	0	0	0			704.559
0	PE(18:0e/16:0)+H	PE(34:0e)+H	PE	(18:0e/16:0)	(18:0e)	(16:0)			706.575	C39 H81 O7 N1 P1	0	0	7.60718e+06	0	3.87727e+06	0	0	0	0	0	46114.9	0	0	0	0	0	0	1.4149e+07	0	0	0	0	0	0	0	0	0	0	0	0	0	0	0	0	0	0			706.572
0	PE(18:0p/16:0)-H	PE(34:0p)-H	PE	(18:0p/16:0)	(18:0p)	(16:0)			702.544	C39 H77 O7 N1 P1	666492	0	1.97674e+07	0	1.73332e+07	0	1.83523e+07	0	132083	0	2.63321e+07	0	169047	0	0	0	0	2.7561e+07	0	0	0	0	0	0	0	0	0	0	0	144770	0	2.57985e+06	0	0	0	0	702.544		702.545
0	PE(18:0p/16:0)+H	PE(34:0p)+H	PE	(18:0p/16:0)	(18:0p)	(16:0)			704.559	C39 H79 O7 N1 P1	966745	0	5.06239e+07	0	3.44961e+07	0	4.18711e+07	0	405041	0	224400	0	0	0	0	186120	0	7.48924e+07	0	0	0	0	0	0	0	1.18918e+06	0	75303.4	0	4.92222e+06	0	6.0148e+06	0	0	0	0	704.559		704.558
0	PE(18:0p/16:0)-H	PE(34:0p)-H	PE	(18:0p/16:0)	(18:0p)	(16:0)			702.544	C39 H77 O7 N1 P1	0	0	0	0	0	0	0	0	0	0	0	0	0	0	0	0	0	0	0	0	0	0	0	0	0	0	0	0	0	3.47847e+07	0	0	0	0	0	0
0	PE(18:0p/16:0)+H	PE(34:0p)+H	PE	(18:0p/16:0)	(18:0p)	(16:0)			704.559	C39 H79 O7 N1 P1	0	0	344398	0	0	0	0	0	0	0	0	0	0	0	0	0	0	0	0	0	0	1.58777e+06	0	2.59019e+06	0	1.36392e+06	0	0	0	1.03417e+08	0	1.22174e+07	0	0	0	0			704.559
0	PE(18:0p/16:0)+H	PE(34:0p)+H	PE	(18:0p/16:0)	(18:0p)	(16:0)			704.559	C39 H79 O7 N1 P1	0	0	0	0	0	0	0	0	0	0	118683	0	0	0	0	0	0	0	0	775.177	0	0	0	0	0	162449	0	4.06149e+06	0	390621	0	0	0	0	0	0
0	PE(18:0p/16:0)-H	PE(34:0p)-H	PE	(18:0p/16:0)	(18:0p)	(16:0)			702.544	C39 H77 O7 N1 P1	0	0	0	0	0	0	0	0	0	0	0	0	0	0	0	0	0	0	0	9.7773e+06	0	1.1494e+07	0	2.21689e+07	0	1.76113e+07	0	0	0	0	0	0	0	0	0	0
0	PE(18:0p/16:0)+H	PE(34:0p)+H	PE	(18:0p/16:0)	(18:0p)	(16:0)			704.559	C39 H79 O7 N1 P1	0	0	0	0	0	0	0	0	0	0	0	119110	0	135759	0	0	0	0	0	4.05439e+07	0	4.51788e+07	0	6.55968e+07	0	4.85295e+07	0	0	0	0	0	0	0	164118	57232.3	0
0	PE(18:0p/16:0)-H	PE(34:0p)-H	PE	(18:0p/16:0)	(18:0p)	(16:0)			702.544	C39 H77 O7 N1 P1	0	0	0	0	0	0	0	0	0	0	0	0	0	0	0	0	0	0	0	9.41425e+06	0	0	0	0	0	0	0	0	0	0	0	0	0	0	0	875306
0	PE(18:0p/16:0)+H	PE(34:0p)+H	PE	(18:0p/16:0)	(18:0p)	(16:0)			704.559	C39 H79 O7 N1 P1	0	0	0	0	0	0	0	0	0	0	0	0	0	0	0	0	0	0	0	4.80819e+07	21733.7	0	0	1.11294e+06	0	0	0	0	0	0	0	0	0	694.433	0	4.20541e+06
0	PE(16:0/18:1)+H	PE(34:1)+H	PE	(16:0/18:1)	(16:0)	(18:1)			718.538	C39 H77 O8 N1 P1	130382	0	347261	0	163611	0	0	0	0	0	0	0	0	0	0	0	0	0	0	0	0	41343.6	0	0	0	0	6.52562e+06	0	7.92211e+06	0	6.58073e+06	0	0	0	0	0	718.538		718.538
0	PE(16:0/18:1)+H	PE(34:1)+H	PE	(16:0/18:1)	(16:0)	(18:1)			718.538	C39 H77 O8 N1 P1	2.98553e+07	0	1.1753e+06	0	3.46179e+07	0	1.3721e+07	9293.35	3.4368e+07	0	8.89755e+06	0	2.14158e+07	0	0	1.39995e+07	0	5.36398e+07	3.28797e+07	0	765.049	0	0	0	1578.74	0	0	0	0	0	0	0	0	0	58.948	0	718.538		718.538
0	PE(16:0/18:1)+H	PE(34:1)+H	PE	(16:0/18:1)	(16:0)	(18:1)			718.538	C39 H77 O8 N1 P1	1.0466e+07	0	2.87678e+08	0	2.53611e+08	0	2.44372e+08	0	197347	0	2.18923e+08	0	2.63483e+06	0	54382.5	3.14575e+06	0	4.2207e+08	0	0	0	0	0	0	0	0	0	0	1.2161e+07	362709	462174	0	0	0	0	0	718.538		718.537
0	PE(16:0/18:1)-H	PE(34:1)-H	PE	(16:0/18:1)	(16:0)	(18:1)			716.524	C39 H75 O8 N1 P1	7.07117e+06	0	1.2729e+08	0	1.24396e+08	0	1.20018e+08	0	3.76896e+06	0	1.08748e+08	0	2.07536e+06	0	0	1.68494e+06	0	1.667e+08	0	0	0	0	0	0	0	0	0	0	0	1712.8	0	0	0	0	0	0	716.525		716.525
0	PE(16:0/18:1)+H	PE(34:1)+H	PE	(16:0/18:1)	(16:0)	(18:1)			718.538	C39 H77 O8 N1 P1	0	0	0	55.848	0	0	0	0	0	0	17601.4	0	0	0	0	0	0	286016	0	0	0	1871.19	544.245	30555.2	0	0	0	0	0	0	515.824	5.74051e+07	0	0	0	0
0	PE(16:0/18:1)-H	PE(34:1)-H	PE	(16:0/18:1)	(16:0)	(18:1)			716.524	C39 H75 O8 N1 P1	0	0	0	0	0	0	0	0	0	0	0	0	0	0	0	0	0	545461	0	0	0	0	0	0	0	0	0	0	0	0	0	2.86129e+07	0	0	0	0
0	PE(16:0/18:1)+H	PE(34:1)+H	PE	(16:0/18:1)	(16:0)	(18:1)			718.538	C39 H77 O8 N1 P1	0	0	0	0	229231	0	0	0	0	0	0	0	0	0	0	0	0	0	4.94681e+06	0	1.66405e+06	0	3.95106e+06	0	8.57211e+06	0	459311	137519	0	5.5928e+08	0	0	0	0	128101	0
0	PE(16:0/18:1)-H	PE(34:1)-H	PE	(16:0/18:1)	(16:0)	(18:1)			716.524	C39 H75 O8 N1 P1	0	0	0	0	0	0	0	0	0	0	0	0	0	0	0	0	0	108809	0	0	0	0	0	0	0	0	0	0	0	1.72423e+08	0	0	0	0	0	0
0	PE(16:0/18:1)+H	PE(34:1)+H	PE	(16:0/18:1)	(16:0)	(18:1)			718.538	C39 H77 O8 N1 P1	0	0	2551.35	0	0	0	0	0	0	0	0	0	0	0	0	194033	0	651559	0	0	0	5158.3	0	89582.1	0	0	0	2.53807e+07	0	629051	267.847	0	0	0	0	0			718.538
0	PE(16:0/18:1)-H	PE(34:1)-H	PE	(16:0/18:1)	(16:0)	(18:1)			716.524	C39 H75 O8 N1 P1	0	0	0	0	0	0	0	0	0	0	0	0	0	0	0	0	0	0	0	0	0	0	0	0	0	0	0	8.99383e+06	0	0	0	0	0	0	0	0
0	PE(16:0/18:1)+H	PE(34:1)+H	PE	(16:0/18:1)	(16:0)	(18:1)			718.538	C39 H77 O8 N1 P1	0	0	0	0	0	0	0	0	0	0	0	0	0	0	0	0	0	9828.4	0	0	0	0	0	91109	0	2.93466e+08	0	0	0	2.69535e+06	0	0	0	0	0	0
0	PE(16:0/18:1)-H	PE(34:1)-H	PE	(16:0/18:1)	(16:0)	(18:1)			716.524	C39 H75 O8 N1 P1	0	0	0	0	0	0	0	0	0	0	0	0	0	0	0	0	0	0	0	0	0	0	0	0	0	9.79715e+07	0	0	0	0	0	0	0	0	0	0
0	PE(16:0/18:1)+H	PE(34:1)+H	PE	(16:0/18:1)	(16:0)	(18:1)			718.538	C39 H77 O8 N1 P1	0	0	0	0	0	0	0	0	0	0	0	0	0	0	0	0	0	0	24235.3	1.91282e+08	0	2.98685e+08	35031.2	4.35341e+08	12693.5	0	38058.4	330763	0	391873	0	0	0	90413.6	0	0
0	PE(16:0/18:1)-H	PE(34:1)-H	PE	(16:0/18:1)	(16:0)	(18:1)			716.524	C39 H75 O8 N1 P1	0	0	0	0	0	0	0	0	0	0	0	0	0	0	0	0	0	0	0	4.67699e+07	0	8.18295e+07	0	1.29983e+08	0	0	0	0	0	0	0	0	0	0	0	0
0	PE(16:0/18:1)+H	PE(34:1)+H	PE	(16:0/18:1)	(16:0)	(18:1)			718.538	C39 H77 O8 N1 P1	0	0	0	0	0	0	0	0	0	0	0	0	0	0	0	0	0	0	0	0	0	0	0	0	0	443433	0	0	0	0	0	0	0	0	0	3.57517e+07
0	PE(16:0/18:1)-H	PE(34:1)-H	PE	(16:0/18:1)	(16:0)	(18:1)			716.524	C39 H75 O8 N1 P1	0	0	0	0	0	0	0	0	0	0	0	0	0	0	0	0	0	0	0	0	0	0	0	0	0	0	0	0	0	0	0	0	0	0	0	6.71769e+06
0	PE(16:0/18:1)+H	PE(34:1)+H	PE	(16:0/18:1)	(16:0)	(18:1)			718.538	C39 H77 O8 N1 P1	0	0	0	0	0	0	0	0	0	0	0	0	0	0	0	0	0	59763.1	0	0	0	731801	0	3.54095e+06	0	841778	0	0	0	4449.11	0	0	0	6.14693e+07	0	0
0	PE(16:0/18:1)-H	PE(34:1)-H	PE	(16:0/18:1)	(16:0)	(18:1)			716.524	C39 H75 O8 N1 P1	0	0	0	0	0	0	0	0	0	0	0	0	0	0	0	0	0	0	0	0	0	0	0	0	0	0	0	0	0	0	0	0	0	6.38552e+06	0	0
0	PE(16:0e/18:1)-H	PE(34:1e)-H	PE	(16:0e/18:1)	(16:0e)	(18:1)			702.544	C39 H77 O7 N1 P1	57476.4	0	2.83388e+07	0	8.35156e+06	0	3.69337e+07	0	209031	0	3.06356e+07	0	88996.1	0	0	0	0	3.89218e+07	0	0	0	0	0	0	0	0	0	0	0	0	0	0	0	0	0	0	702.544		702.544
0	PE(34:1e)+H	PE(34:1e)+H	PE	(16:0e/18:1)	(16:0e)	(18:1)			704.559	C39 H79 O7 N1 P1	600287	0	5.82848e+07	0	5.73628e+07	0	3.37305e+07	0	205098	0	4.38786e+07	0	0	0	0	79014.7	65271.4	8.95937e+07	0	0	0	0	0	0	0	0	0	1.10586e+06	0	0	0	0	0	0	0	0	704.559		704.559
1	PE(16:0e/18:1)-H	PE(34:1e)-H	PE	(16:0e/18:1)	(16:0e)	(18:1)			702.544	C39 H77 O7 N1 P1	0	0	0	0	0	0	0	0	0	0	0	0	0	0	0	0	0	348443	0	0	0	0	0	0	0	0	0	0	0	2.3558e+07	0	0	0	0	0	0
1	PE(34:1e)+H	PE(34:1e)+H	PE	(16:0e/18:1)	(16:0e)	(18:1)			704.559	C39 H79 O7 N1 P1	0	0	304258	0	0	0	4130.09	0	2025.9	0	5117.56	0	0	0	0	91337.4	0	8752.25	0	0	0	0	0	0	0	0	0	0	0	1.60088e+08	0	0	0	0	0	0			704.559
1	PE(16:0p/18:1)-H	PE(34:1p)-H	PE	(16:0p/18:1)	(16:0p)	(18:1)			700.529	C39 H75 O7 N1 P1	0	3.45212e+06	0	222772	0	0	0	0	0	0	0	0	0	0	907973	0	723410	0	8.61799e+06	0	974520	0	282926	0	4.47012e+06	0	1.2386e+06	42534.8	955032	0	3.29239e+06	0	0	0	1.02082e+06	0		700.529
1	PE(16:0p/18:1)+H	PE(34:1p)+H	PE	(16:0p/18:1)	(16:0p)	(18:1)			702.543	C39 H77 O7 N1 P1	3.40933e+07	2.80941e+07	7.49967e+07	6.15131e+06	3.82747e+07	0	2.66368e+07	0	2.03843e+07	0	2.29391e+07	0	3.03432e+07	0	5.96093e+06	2.06087e+07	5.51532e+06	3.94863e+07	4.84254e+07	0	1.01015e+06	0	988640	0	3.03773e+06	0	1.72536e+07	0	9.1685e+06	0	1.21471e+07	4.12689e+06	1.55872e+06	0	791764	86752.6		702.543
1	PE(16:0p/18:1)-H	PE(34:1p)-H	PE	(16:0p/18:1)	(16:0p)	(18:1)			700.529	C39 H75 O7 N1 P1	0	3.45212e+06	0	137394	0	0	0	0	0	0	0	0	0	0	1.38066e+06	0	654243	0	8.61799e+06	0	974520	0	282926	0	4.47012e+06	0	1.24724e+06	42534.8	994258	0	1.14705e+06	0	0	0	1.02082e+06	0
1	PE(16:0p/18:1)+H	PE(34:1p)+H	PE	(16:0p/18:1)	(16:0p)	(18:1)			702.543	C39 H77 O7 N1 P1	3.40933e+07	2.47514e+07	7.49967e+07	6.15131e+06	3.82747e+07	0	2.66368e+07	0	2.03843e+07	0	2.29391e+07	0	3.03432e+07	0	2.26602e+07	2.06087e+07	5.34564e+06	3.94863e+07	4.84254e+07	0	1.01015e+06	0	988640	0	3.03773e+06	0	1.77585e+07	0	4.75789e+06	0	7.81666e+06	4.12689e+06	1.55872e+06	0	791764	69805
0	PE(16:0p/18:1)-H	PE(34:1p)-H	PE	(16:0p/18:1)	(16:0p)	(18:1)			700.529	C39 H75 O7 N1 P1	0	3.45212e+06	0	222772	0	0	0	0	0	0	0	0	0	0	1.38066e+06	0	654243	0	1.02646e+07	0	1.05321e+06	0	292228	0	109592	0	1.2386e+06	42534.8	955032	0	3.29239e+06	0	0	0	764556	0
0	PE(16:0p/18:1)+H	PE(34:1p)+H	PE	(16:0p/18:1)	(16:0p)	(18:1)			702.543	C39 H77 O7 N1 P1	4.05228e+06	2.80941e+07	7.49967e+07	6.15131e+06	271469	0	2.66368e+07	0	2.03843e+07	0	2.29391e+07	0	76271.9	0	2.26602e+07	2.06087e+07	5.34564e+06	3.94863e+07	3.32596e+07	0	1.08629e+06	0	1.17505e+06	0	3.13043e+06	0	1.72536e+07	0	9.1685e+06	0	1.21471e+07	4.12689e+06	1.55872e+06	0	796686	69805	702.543
0	PE(16:0p/18:1)-H	PE(34:1p)-H	PE	(16:0p/18:1)	(16:0p)	(18:1)			700.529	C39 H75 O7 N1 P1	1.23927e+07	0	2.9274e+08	0	2.63197e+08	0	2.95576e+08	0	5.7181e+06	0	2.63264e+08	0	2.08101e+06	0	0	1.34504e+06	0	3.72973e+08	0	0	0	0	0	0	0	0	0	0	0	422433	0	129863	0	0	0	0	700.529		700.529
0	PE(16:0p/18:1)+H	PE(34:1p)+H	PE	(16:0p/18:1)	(16:0p)	(18:1)			702.543	C39 H77 O7 N1 P1	1.44404e+07	127322	5.56724e+08	0	5.54688e+08	0	5.20493e+08	0	8.00135e+06	0	4.36363e+08	0	2.64554e+06	0	90885.4	2.67298e+06	0	7.65144e+08	0	0	0	0	0	0	0	0	0	0	0	1.19238e+06	23807.3	0	0	0	0	0	702.542	702.543	702.542
0	PE(16:0p/18:1)-H	PE(34:1p)-H	PE	(16:0p/18:1)	(16:0p)	(18:1)			700.529	C39 H75 O7 N1 P1	0	0	0	0	0	0	0	0	0	0	0	0	0	0	0	0	0	0	0	0	0	0	0	0	0	0	0	0	0	0	0	3.71679e+07	0	0	0	0
0	PE(16:0p/18:1)-H	PE(34:1p)-H	PE	(16:0p/18:1)	(16:0p)	(18:1)			700.529	C39 H75 O7 N1 P1	0	0	0	0	0	0	0	0	0	0	0	0	0	0	0	0	0	0	0	0	0	0	0	0	0	0	0	0	0	5.10531e+08	0	0	0	0	0	0
0	PE(16:0p/18:1)+H	PE(34:1p)+H	PE	(16:0p/18:1)	(16:0p)	(18:1)			702.543	C39 H77 O7 N1 P1	0	0	0	0	0	0	0	0	0	0	0	0	0	0	904028	0	0	0	0	0	21554.6	0	2075.95	0	0	0	183.787	0	2994.57	1.47468e+09	815815	0	0	0	0	0
0	PE(16:0p/18:1)-H	PE(34:1p)-H	PE	(16:0p/18:1)	(16:0p)	(18:1)			700.529	C39 H75 O7 N1 P1	0	0	0	0	0	0	0	0	0	0	0	0	0	0	0	0	0	0	0	0	0	0	0	1563.14	0	0	0	2.14536e+07	0	0	0	0	0	0	0	0
0	PE(16:0p/18:1)+H	PE(34:1p)+H	PE	(16:0p/18:1)	(16:0p)	(18:1)			702.543	C39 H77 O7 N1 P1	0	0	0	0	7820.83	0	0	0	0	0	0	0	0	0	0	0	0	0	947046	0	284832	0	241411	0	177585	168578	4.26077e+06	5.61496e+07	0	0	0	0	381594	0	424226	0
0	PE(16:0p/18:1)-H	PE(34:1p)-H	PE	(16:0p/18:1)	(16:0p)	(18:1)			700.529	C39 H75 O7 N1 P1	0	0	0	275.715	0	0	0	0	0	0	0	0	0	0	0	0	0	0	0	0	0	653052	0	343855	0	2.23496e+08	0	0	0	0	0	0	0	0	0	0
0	PE(16:0p/18:1)+H	PE(34:1p)+H	PE	(16:0p/18:1)	(16:0p)	(18:1)			702.543	C39 H77 O7 N1 P1	0	0	0	0	0	0	0	0	0	0	0	0	0	0	0	0	0	0	0	0	0	3.73632e+06	0	3.20575e+06	0	5.89041e+08	0	0	0	0	0	0	1.79523e+06	0	0	0
0	PE(16:0p/18:1)-H	PE(34:1p)-H	PE	(16:0p/18:1)	(16:0p)	(18:1)			700.529	C39 H75 O7 N1 P1	0	0	0	0	0	0	0	0	0	0	0	0	0	0	0	0	0	0	0	1.08101e+08	0	2.69395e+08	0	3.30959e+08	0	0	0	0	0	0	0	0	0	0	0	0
0	PE(16:0p/18:1)+H	PE(34:1p)+H	PE	(16:0p/18:1)	(16:0p)	(18:1)			702.543	C39 H77 O7 N1 P1	0	0	0	0	0	0	0	0	0	0	0	0	0	0	0	0	0	0	0	3.99018e+08	0	8.93695e+08	0	9.88457e+08	0	0	0	0	0	1.83178e+06	0	0	0	0	0	0
1	PE(16:0p/18:1)-H	PE(34:1p)-H	PE	(16:0p/18:1)	(16:0p)	(18:1)			700.529	C39 H75 O7 N1 P1	0	0	0	0	0	0	0	0	0	0	0	0	0	0	217.308	0	0	0	0	8251.81	0	0	0	0	0	0	0	0	0	0	0	0	0	0	0	1.24107e+07
1	PE(16:0p/18:1)+H	PE(34:1p)+H	PE	(16:0p/18:1)	(16:0p)	(18:1)			702.543	C39 H77 O7 N1 P1	0	0	0	0	0	0	0	0	0	0	0	0	0	0	0	0	0	0	0	0	0	0	0	2.05259e+06	0	0	0	0	0	5706.38	0	0	0	0	0	4.61179e+07
0	PE(16:0p/18:1)-H	PE(34:1p)-H	PE	(16:0p/18:1)	(16:0p)	(18:1)			700.529	C39 H75 O7 N1 P1	1.25048e+07	0	2.96511e+08	14336.3	2.69486e+08	0	2.51479e+08	0	5.7066e+06	0	2.73343e+08	0	2.05457e+06	0	16314.2	1.33391e+06	0	3.76219e+08	0	1.08713e+08	0	2.76677e+08	0	3.32702e+08	0	2.29499e+08	0	2.14793e+07	0	5.27421e+08	0	3.73085e+07	0	9.12201e+06	0	1.29891e+07
0	PE(16:0p/18:1)+H	PE(34:1p)+H	PE	(16:0p/18:1)	(16:0p)	(18:1)			702.543	C39 H77 O7 N1 P1	1.45913e+07	704102	5.71156e+08	0	5.66135e+08	0	4.75982e+08	0	8.13203e+06	0	4.45507e+08	0	2.80581e+06	0	2.68246e+07	2.68389e+06	0	7.85994e+08	5.90131e+06	4.09316e+08	5.68502e+06	9.03755e+08	2.97298e+07	9.96098e+08	5.0572e+06	5.93731e+08	4.14881e+07	5.59995e+07	3.52248e+07	1.5176e+09	1.36344e+07	7.29109e+07	2.02103e+07	1.27785e+08	1.00749e+07	4.65566e+07
0	PE(16:1/18:1)+H	PE(34:2)+H	PE	(16:1/18:1)	(16:1)	(18:1)			716.522	C39 H75 O8 N1 P1	1937.09	0	2.80097e+07	0	2.58789e+07	157941	2.09961e+07	301363	3957.08	1864.07	2.67388e+07	0	0	0	0	2429.44	0	4.7971e+07	0	0	0	0	0	1.25637e+06	0	0	0	0	0	0	0	0	0	493366	0	0	716.522		716.522
0	PE(16:1/18:1)-H	PE(34:2)-H	PE	(16:1/18:1)	(16:1)	(18:1)			714.508	C39 H73 O8 N1 P1	0	0	5.09213e+06	0	1.41737e+06	0	3.36398e+06	0	116951	0	3.93622e+06	0	0	0	0	0	0	9.24975e+06	0	0	0	0	0	0	0	0	0	0	0	0	0	0	0	0	0	0			714.508
0	PE(16:1/18:1)+H	PE(34:2)+H	PE	(16:1/18:1)	(16:1)	(18:1)			716.522	C39 H75 O8 N1 P1	0	0	0	887.328	0	0	0	0	0	0	0	0	0	0	0	0	953580	0	0	0	0	0	0	0	0	0	0	0	0	0	0	1.34283e+07	0	0	0	0
0	PE(16:1/18:1)+H	PE(34:2)+H	PE	(16:1/18:1)	(16:1)	(18:1)			716.522	C39 H75 O8 N1 P1	0	1573.59	0	0	0	0	0	0	0	0	0	173459	0	1489.85	0	0	58968.2	0	0	0	0	0	0	8845.53	0	0	0	0	0	6.05804e+07	0	0	0	0	0	0		716.522
0	PE(16:1/18:1)-H	PE(34:2)-H	PE	(16:1/18:1)	(16:1)	(18:1)			714.508	C39 H73 O8 N1 P1	0	0	0	0	0	0	0	0	0	0	0	0	0	0	0	0	0	0	0	0	0	0	0	0	0	0	0	0	0	5.71361e+06	0	0	0	0	0	0
0	PE(16:1/18:1)+H	PE(34:2)+H	PE	(16:1/18:1)	(16:1)	(18:1)			716.522	C39 H75 O8 N1 P1	0	0	0	0	0	0	0	0	0	0	0	58575.2	0	0	750.828	0	0	0	0	0	0	0	730040	0	0	8.37504e+06	0	0	0	0	0	0	0	0	0	0
0	PE(16:1/18:1)-H	PE(34:2)-H	PE	(16:1/18:1)	(16:1)	(18:1)			714.508	C39 H73 O8 N1 P1	0	0	0	0	0	0	0	0	0	0	0	0	0	0	228.553	0	0	0	0	0	0	0	0	0	0	2.45929e+06	0	0	0	0	0	0	0	0	0	0
0	PE(16:1/18:1)+H	PE(34:2)+H	PE	(16:1/18:1)	(16:1)	(18:1)			716.522	C39 H75 O8 N1 P1	0	0	0	0	0	0	0	0	0	0	0	0	0	0	3828.16	0	0	0	0	0	0	9.51591e+06	0	1.59347e+07	0	0	1439.18	0	0	0	540567	0	327975	0	0	0
0	PE(16:1/18:1)-H	PE(34:2)-H	PE	(16:1/18:1)	(16:1)	(18:1)			714.508	C39 H73 O8 N1 P1	0	0	0	0	0	0	0	0	0	0	1772.59	0	0	0	0	0	0	0	0	297467	0	1.67216e+06	0	5.78756e+06	0	0	0	0	0	0	0	0	0	0	0	0
0	PE(18:1p/16:1)-H	PE(34:2p)-H	PE	(18:1p/16:1)	(18:1p)	(16:1)			698.513	C39 H73 O7 N1 P1	0	0	6.59044e+06	0	7.49969e+06	0	4.13997e+06	0	0	0	5.00001e+06	0	0	0	8010.48	0	0	8.81678e+06	0	0	0	0	0	0	0	0	0	0	0	0	0	0	0	0	0	0			698.513
0	PE(18:1p/16:1)+H	PE(34:2p)+H	PE	(18:1p/16:1)	(18:1p)	(16:1)			700.528	C39 H75 O7 N1 P1	208251	0	2.10968e+07	0	1.34037e+07	0	8.95066e+06	0	0	0	9.85363e+06	0	0	0	0	0	0	2.43064e+07	0	0	0	0	0	0	0	0	0	0	0	0	0	0	0	0	0	0	700.528		700.528
0	PE(18:1p/16:1)-H	PE(34:2p)-H	PE	(18:1p/16:1)	(18:1p)	(16:1)			698.513	C39 H73 O7 N1 P1	0	0	0	0	0	0	0	0	0	0	0	0	0	0	0	32529.2	0	0	0	0	0	0	0	0	0	0	0	0	0	1.0779e+07	0	0	0	0	0	0
0	PE(18:1p/16:1)+H	PE(34:2p)+H	PE	(18:1p/16:1)	(18:1p)	(16:1)			700.528	C39 H75 O7 N1 P1	0	0	0	0	0	0	0	0	0	0	0	0	0	0	0	0	0	0	0	0	0	0	0	2210.98	0	0	0	0	0	2.99621e+07	0	0	0	0	0	3387.02
0	PE(18:1p/16:1)-H	PE(34:2p)-H	PE	(18:1p/16:1)	(18:1p)	(16:1)			698.513	C39 H73 O7 N1 P1	0	0	0	0	0	0	0	0	0	0	0	0	0	0	0	0	0	0	0	0	0	0	0	0	0	3.75875e+06	0	1478.79	0	0	0	0	0	0	0	0
0	PE(18:1p/16:1)+H	PE(34:2p)+H	PE	(18:1p/16:1)	(18:1p)	(16:1)			700.528	C39 H75 O7 N1 P1	0	0	0	0	0	0	0	0	0	0	0	0	0	0	0	0	0	0	0	0	0	0	0	0	0	1.72735e+07	0	0	0	0	0	0	0	0	0	0
0	PE(18:1p/16:1)-H	PE(34:2p)-H	PE	(18:1p/16:1)	(18:1p)	(16:1)			698.513	C39 H73 O7 N1 P1	0	0	0	0	0	0	0	0	0	0	0	0	0	0	0	0	0	0	0	1.81956e+06	0	9.0038e+06	0	1.66216e+07	0	0	0	0	0	0	0	0	0	0	0	0
0	PE(18:1p/16:1)+H	PE(34:2p)+H	PE	(18:1p/16:1)	(18:1p)	(16:1)			700.528	C39 H75 O7 N1 P1	0	0	0	0	0	0	0	0	0	0	0	0	0	0	0	0	0	0	0	2.45852e+07	0	8.79429e+07	0	7.66407e+07	0	0	0	0	152256	0	0	0	0	0	0	0
0	PE(34:3)+H	PE(34:3)+H	PE	(34:3)	(34:3)				714.507	C39 H73 O8 N1 P1	1625.81	0	2.12387e+06	0	2.82124e+06	0	2.44614e+06	0	0	0	9.12132e+06	0	0	0	0	0	0	3.42431e+06	0	57364.9	0	68580.2	0	4857.3	0	1.89974e+06	0	0	0	53886.5	0	167738	0	1.44435e+06	0	329516	714.507		714.507
0	PE(16:0p/19:1)+H	PE(35:1p)+H	PE	(16:0p/19:1)	(16:0p)	(19:1)			716.559	C40 H79 O7 N1 P1	169099	1.63205e+06	1.93691e+07	7.19603e+06	1.85828e+07	0	1.59485e+07	0	0	0	1.27396e+07	0	0	0	0	0	8.6168e+06	1.99658e+07	0	0	0	0	0	0	0	0	0	0	0	0	0	0	0	1.27956e+06	0	0	716.559	716.559	716.558
0	PE(16:0p/19:1)-H	PE(35:1p)-H	PE	(16:0p/19:1)	(16:0p)	(19:1)			714.544	C40 H77 O7 N1 P1	305854	0	9.2661e+06	0	1.14409e+07	0	1.04651e+06	0	890.387	0	6.49408e+06	0	117727	0	0	0	0	8.0285e+06	0	0	0	0	0	0	0	0	0	0	0	0	0	0	0	0	0	0	714.544		714.545
0	PE(16:0p/19:1)+H	PE(35:1p)+H	PE	(16:0p/19:1)	(16:0p)	(19:1)			716.559	C40 H79 O7 N1 P1	0	0	0	0	0	0	0	0	0	0	0	43740.6	0	0	888098	0	0	0	0	0	0	0	129363	0	52141.2	0	0	0	149181	5.16364e+07	1.20492e+06	0	0	0	0	0
0	PE(16:0p/19:1)-H	PE(35:1p)-H	PE	(16:0p/19:1)	(16:0p)	(19:1)			714.544	C40 H77 O7 N1 P1	0	0	0	0	0	0	0	0	0	0	0	0	0	0	0	0	0	0	0	0	0	0	0	0	0	7.12362e+06	0	111843	0	0	0	0	0	0	0	0
0	PE(16:0p/19:1)+H	PE(35:1p)+H	PE	(16:0p/19:1)	(16:0p)	(19:1)			716.559	C40 H79 O7 N1 P1	0	0	0	0	0	0	0	0	0	0	0	0	0	0	0	0	0	0	1.67723e+06	0	203026	0	964159	0	65078.2	1.64656e+07	1.36088e+06	0	0	0	0	0	1.66847e+06	0	351967	0
0	PE(16:0p/19:1)-H	PE(35:1p)-H	PE	(16:0p/19:1)	(16:0p)	(19:1)			714.544	C40 H77 O7 N1 P1	0	0	0	0	0	0	0	0	0	0	0	0	0	0	0	0	0	0	0	12308.4	0	6.66568e+06	0	2.34242e+07	0	627155	0	41320.8	0	0	0	0	0	0	0	0
0	PE(16:0p/19:1)+H	PE(35:1p)+H	PE	(16:0p/19:1)	(16:0p)	(19:1)			716.559	C40 H79 O7 N1 P1	0	0	0	0	0	0	0	0	185785	0	0	0	0	0	0	0	0	0	0	1.94576e+07	0	4.16435e+07	0	5.06944e+07	0	0	0	0	0	0	0	0	614866	0	347116	0
0	PE(18:1p/17:1)+H	PE(35:2p)+H	PE	(18:1p/17:1)	(18:1p)	(17:1)			714.543	C40 H77 O7 N1 P1	0	0	0	354.059	0	0	0	0	0	0	0	0	0	0	0	0	589636	0	0	0	0	0	0	0	0	0	0	0	0	6.86399e+06	0	0	0	5765.1	0	0
0	PE(18:1p/17:1)-H	PE(35:2p)-H	PE	(18:1p/17:1)	(18:1p)	(17:1)			712.529	C40 H75 O7 N1 P1	0	0	0	0	0	0	0	0	0	0	0	0	0	0	0	0	0	0	0	0	0	0	0	0	0	0	0	0	0	2.10299e+06	0	0	0	0	0	0
0	PE(35:4)-H	PE(35:4)-H	PE	(35:4)	(35:4)				724.492	C40 H71 O8 N1 P1	0	0	0	0	0	0	0	0	0	0	0	0	0	0	0	0	0	0	0	0	0	0	0	115860	0	641103	0	0	0	0	0	0	0	0	0	0
0	PE(16:0p/20:0)-H	PE(36:0p)-H	PE	(16:0p/20:0)	(16:0p)	(20:0)			730.576	C41 H81 O7 N1 P1	0	0	3.24841e+06	0	2.67789e+06	0	2.66821e+06	0	0	0	2.26449e+06	0	0	0	0	0	0	494772	0	0	0	0	0	0	0	0	0	0	0	0	0	751171	0	0	0	0			730.576
0	PE(16:0p/20:0)+H	PE(36:0p)+H	PE	(16:0p/20:0)	(16:0p)	(20:0)			732.59	C41 H83 O7 N1 P1	0	0	1.07685e+07	0	7.46764e+06	0	8.84466e+06	0	0	0	8.92417e+06	0	0	0	0	0	0	0	0	0	0	0	0	0	0	0	0	0	0	368742	0	2964.88	0	0	0	0			732.59
0	PE(16:0p/20:0)-H	PE(36:0p)-H	PE	(16:0p/20:0)	(16:0p)	(20:0)			730.576	C41 H81 O7 N1 P1	0	0	0	0	0	0	0	0	0	0	0	0	0	0	0	0	0	0	0	0	0	0	0	0	0	0	0	0	0	8.20952e+06	0	0	0	0	0	0
0	PE(16:0p/20:0)+H	PE(36:0p)+H	PE	(16:0p/20:0)	(16:0p)	(20:0)			732.59	C41 H83 O7 N1 P1	0	0	0	0	0	0	0	0	0	0	0	0	0	0	0	0	0	0	0	0	0	0	0	0	0	0	0	30790.3	0	3.48286e+07	0	0	0	0	0	0
0	PE(16:0p/20:0)-H	PE(36:0p)-H	PE	(16:0p/20:0)	(16:0p)	(20:0)			730.576	C41 H81 O7 N1 P1	0	0	0	0	0	0	0	0	0	0	0	0	0	0	0	0	0	0	0	7.83186e+06	0	3.90839e+06	0	5.69239e+06	0	3.53442e+06	0	0	0	0	0	0	0	0	0	0
0	PE(18:0/18:1)+H	PE(36:1)+H	PE	(18:0/18:1)	(18:0)	(18:1)			746.569	C41 H81 O8 N1 P1	0	1.04308e+07	0	8.88618e+06	0	0	0	0	0	0	0	0	0	97106.9	55966.7	0	540633	0	0	0	0	0	0	0	0	0	0	0	0	0	0	0	0	0	0	0		746.569
0	PE(18:0/18:1)+H	PE(36:1)+H	PE	(18:0/18:1)	(18:0)	(18:1)			746.569	C41 H81 O8 N1 P1	0	0	0	0	0	0	0	0	0	0	0	0	0	0	0	0	0	0	0	0	0	0	0	0	0	0	835530	0	3.93944e+06	0	6.14762e+06	0	0	0	39368.1	0
0	PE(18:0/18:1)+H	PE(36:1)+H	PE	(18:0/18:1)	(18:0)	(18:1)			746.569	C41 H81 O8 N1 P1	1.43343e+07	0	770477	0	3.75952e+08	0	3.38406e+08	0	6.91796e+06	0	3.10744e+08	0	2.20966e+06	0	2.39069e+06	2949.6	0	5.68154e+08	0	0	0	0	2.10669e+06	0	127287	0	0	0	2.9453e+06	5.53585e+06	89591.1	1.42895e+06	0	0	0	0	746.569		746.569
0	PE(18:0/18:1)-H	PE(36:1)-H	PE	(18:0/18:1)	(18:0)	(18:1)			744.555	C41 H79 O8 N1 P1	1.18671e+07	0	2.02275e+08	0	2.00045e+08	0	2.29035e+08	0	3.82419e+06	0	1.94155e+08	0	2.36459e+06	0	0	1.29997e+06	0	3.18717e+08	0	0	0	0	0	0	0	0	0	0	0	2.29981e+06	0	137644	0	0	0	0	744.555		744.556
0	PE(18:0/18:1)+H	PE(36:1)+H	PE	(18:0/18:1)	(18:0)	(18:1)			746.569	C41 H81 O8 N1 P1	0	0	0	0	0	0	0	0	0	0	0	0	0	0	446634	0	0	0	0	0	0	0	0	0	0	0	0	0	0	187005	907919	8.41025e+07	0	0	0	0
0	PE(18:0/18:1)-H	PE(36:1)-H	PE	(18:0/18:1)	(18:0)	(18:1)			744.555	C41 H79 O8 N1 P1	0	0	0	0	0	0	0	0	0	0	0	0	0	0	0	0	0	0	0	0	0	0	0	0	0	0	0	0	0	0	0	4.3296e+07	0	0	0	0
0	PE(16:0/20:1)+H	PE(36:1)+H	PE	(16:0/20:1)	(16:0)	(20:1)			746.569	C41 H81 O8 N1 P1	0	0	0	0	0	0	0	0	0	0	0	0	0	0	0	0	0	0	0	0	0	0	101056	0	175.321	0	0	313296	0	1.12428e+09	0	0	0	0	0	0
0	PE(16:0/20:1)-H	PE(36:1)-H	PE	(16:0/20:1)	(16:0)	(20:1)			744.555	C41 H79 O8 N1 P1	0	0	0	0	0	0	0	0	0	0	0	0	0	0	0	0	0	0	0	0	0	0	0	0	0	0	0	0	0	4.20581e+08	0	0	0	0	0	0
0	PE(18:0/18:1)+H	PE(36:1)+H	PE	(18:0/18:1)	(18:0)	(18:1)			746.569	C41 H81 O8 N1 P1	0	0	0	0	0	0	0	0	0	0	0	0	0	0	0	0	0	0	0	0	0	3696.64	0	348534	0	1.595e+06	92161.1	6.3647e+07	0	3065.47	0	0	627404	0	0	0
0	PE(18:0/18:1)+H	PE(36:1)+H	PE	(18:0/18:1)	(18:0)	(18:1)			746.569	C41 H81 O8 N1 P1	0	0	0	0	0	0	0	0	0	0	0	0	0	0	0	0	0	0	0	7.47978e+06	0	1.80433e+07	0	1.79957e+07	0	5.70102e+08	0	0	0	0	0	0	0	0	0	0
0	PE(18:0/18:1)-H	PE(36:1)-H	PE	(18:0/18:1)	(18:0)	(18:1)			744.555	C41 H79 O8 N1 P1	0	0	0	0	0	0	0	0	0	0	0	0	0	0	0	0	0	0	0	22042.9	0	8.70279e+06	0	9.27936e+06	0	1.6258e+08	0	0	0	0	0	0	0	0	0	0
0	PE(18:0/18:1)+H	PE(36:1)+H	PE	(18:0/18:1)	(18:0)	(18:1)			746.569	C41 H81 O8 N1 P1	0	0	0	0	0	0	0	0	0	0	0	0	0	0	0	0	0	128717	0	4.4631e+08	20351.9	8.20541e+08	0	9.83353e+08	0	0	0	0	0	364509	0	0	0	0	0	410598
0	PE(18:0/18:1)-H	PE(36:1)-H	PE	(18:0/18:1)	(18:0)	(18:1)			744.555	C41 H79 O8 N1 P1	0	0	0	0	0	0	0	0	0	0	0	0	0	0	0	0	0	0	0	7.17029e+07	0	1.6405e+08	0	2.46674e+08	0	102811	0	0	0	0	0	0	0	0	0	686940
0	PE(18:0/18:1)+H	PE(36:1)+H	PE	(18:0/18:1)	(18:0)	(18:1)			746.569	C41 H81 O8 N1 P1	0	0	0	0	0	0	0	0	0	0	44798.6	0	0	0	0	0	0	1368.9	0	0	0	13684.6	0	888176	0	12420.3	0	0	0	14272.6	0	0	0	2.7263e+06	0	5.66155e+07
0	PE(36:1e)+H	PE(36:1e)+H	PE	(36:1e)	(36:1e)				732.59	C41 H83 O7 N1 P1	1.18623e+06	0	3.27362e+07	0	2.77881e+07	0	3.04337e+07	0	434934	0	2.72053e+07	0	0	0	0	0	0	4.16589e+07	0	0	0	0	0	0	0	0	0	132314	0	129802	0	0	0	0	0	0	732.59		732.59
0	PE(18:0p/18:1)-H	PE(36:1p)-H	PE	(18:0p/18:1)	(18:0p)	(18:1)			728.56	C41 H79 O7 N1 P1	0	3.82554e+06	0	423356	0	0	0	0	0	0	0	0	0	0	17147.6	0	833912	0	0	0	0	0	0	0	0	0	0	0	0	0	0	0	0	0	0	0		728.561
0	PE(18:0p/18:1)+H	PE(36:1p)+H	PE	(18:0p/18:1)	(18:0p)	(18:1)			730.575	C41 H81 O7 N1 P1	0	1.14428e+07	0	2.04916e+06	0	0	0	0	0	0	0	0	0	0	1.0472e+07	0	1.36757e+06	0	40287.2	0	24458	0	0	0	0	0	0	0	0	0	0	0	0	0	0	0		730.575
0	PE(18:0p/18:1)-H	PE(36:1p)-H	PE	(18:0p/18:1)	(18:0p)	(18:1)			728.56	C41 H79 O7 N1 P1	0	0	0	0	0	0	0	0	0	0	0	0	0	0	0	0	0	0	0	0	0	0	0	0	0	0	2.38432e+06	0	178671	0	6.70295e+06	0	0	0	0	0
0	PE(18:0p/18:1)+H	PE(36:1p)+H	PE	(18:0p/18:1)	(18:0p)	(18:1)			730.575	C41 H81 O7 N1 P1	0	0	0	0	0	0	0	0	0	0	0	0	0	0	0	0	0	0	490.21	0	0	0	0	0	0	0	120909	0	6260.65	0	1.08695e+07	0	0	0	0	0
0	PE(18:0p/18:1)-H	PE(36:1p)-H	PE	(18:0p/18:1)	(18:0p)	(18:1)			728.56	C41 H79 O7 N1 P1	0	0	0	0	0	0	0	0	0	0	0	0	0	0	0	0	0	0	1.13736e+07	0	214775	0	0	0	268416	0	0	0	0	0	0	0	0	0	209584	0
0	PE(18:0p/18:1)+H	PE(36:1p)+H	PE	(18:0p/18:1)	(18:0p)	(18:1)			730.575	C41 H81 O7 N1 P1	283403	0	0	0	266192	0	578616	0	0	0	101597	0	92345.1	0	0	2.29004e+06	0	0	7.07965e+06	0	167353	0	86861.7	0	2.40691e+06	0	0	0	0	0	0	0	55795	0	575644	0	730.575
0	PE(18:0p/18:1)-H	PE(36:1p)-H	PE	(18:0p/18:1)	(18:0p)	(18:1)			728.56	C41 H79 O7 N1 P1	63209.3	0	2.31907e+07	0	2.44467e+07	0	7.21349e+06	0	0	0	3.34378e+07	0	0	0	0	0	0	2.29919e+07	0	0	0	0	0	0	0	0	0	0	0	0	0	0	0	0	0	0	728.56		728.56
0	PE(16:0p/20:1)-H	PE(36:1p)-H	PE	(16:0p/20:1)	(16:0p)	(20:1)			728.56	C41 H79 O7 N1 P1	1.72145e+07	0	3.06791e+08	0	3.39898e+08	0	4.22954e+08	0	6.63107e+06	0	3.14977e+08	0	2.79887e+06	0	0	1.52563e+06	0	4.02546e+08	0	0	0	0	0	0	0	0	0	0	0	187794	0	234470	0	0	0	0	728.561		728.561
0	PE(16:0p/20:1)+H	PE(36:1p)+H	PE	(16:0p/20:1)	(16:0p)	(20:1)			730.575	C41 H81 O7 N1 P1	1.93038e+07	0	6.73025e+08	136467	6.85647e+08	0	6.12874e+08	0	13857.8	152008	5.16018e+08	0	3.83985e+06	0	74473.7	2.78243e+06	186192	1.02076e+09	0	0	0	0	371842	0	0	0	0	0	0	110698	59462.1	4.98844e+06	0	0	0	265628	730.574		730.574
0	PE(18:0p/18:1)-H	PE(36:1p)-H	PE	(18:0p/18:1)	(18:0p)	(18:1)			728.56	C41 H79 O7 N1 P1	0	0	0	0	0	0	0	0	0	0	0	0	0	0	0	0	0	0	0	0	0	0	0	0	0	0	0	0	0	263637	0	5.33635e+07	0	0	0	0
0	PE(18:0p/18:1)+H	PE(36:1p)+H	PE	(18:0p/18:1)	(18:0p)	(18:1)			730.575	C41 H81 O7 N1 P1	0	0	0	0	6382.56	0	0	0	0	0	0	0	0	0	0	0	0	0	0	0	0	0	0	0	0	0	0	0	0	750765	0	9.67884e+07	0	0	0	0
0	PE(16:0p/20:1)-H	PE(36:1p)-H	PE	(16:0p/20:1)	(16:0p)	(20:1)			728.56	C41 H79 O7 N1 P1	0	0	0	0	0	0	0	0	0	0	0	0	0	0	0	0	0	0	0	0	0	0	0	0	0	0	0	0	0	7.60467e+08	0	0	0	0	0	0
0	PE(16:0p/20:1)+H	PE(36:1p)+H	PE	(16:0p/20:1)	(16:0p)	(20:1)			730.575	C41 H81 O7 N1 P1	0	0	0	1111.26	344096	0	0	0	0	0	0	48010.7	0	0	0	0	0	533284	0	0	916.106	0	327402	0	18423.9	1.12012e+07	0	0	3961.14	2.20589e+09	0	0	0	0	0	0
0	PE(18:0p/18:1)-H	PE(36:1p)-H	PE	(18:0p/18:1)	(18:0p)	(18:1)			728.56	C41 H79 O7 N1 P1	0	0	0	0	0	0	0	0	0	0	0	0	0	0	0	0	0	0	0	0	0	0	0	0	0	2.4962e+06	0	3.42592e+07	0	48342.5	0	0	0	0	0	0
0	PE(18:0p/18:1)+H	PE(36:1p)+H	PE	(18:0p/18:1)	(18:0p)	(18:1)			730.575	C41 H81 O7 N1 P1	0	0	8636.98	0	275552	0	0	0	0	0	2361.92	0	0	0	7543.18	0	0	8380.1	0	4.97369e+06	0	0	0	0	0	2.31755e+06	0	7.80932e+07	0	333878	299394	0	0	0	0	0			730.575
0	PE(16:0p/20:1)-H	PE(36:1p)-H	PE	(16:0p/20:1)	(16:0p)	(20:1)			728.56	C41 H79 O7 N1 P1	0	0	0	0	0	0	0	0	0	0	0	0	0	0	0	0	0	0	0	8.59751e+06	0	3.46684e+08	0	4.53424e+08	0	3.17867e+08	0	0	0	0	0	0	0	0	0	0
0	PE(16:0p/20:1)+H	PE(36:1p)+H	PE	(16:0p/20:1)	(16:0p)	(20:1)			730.575	C41 H81 O7 N1 P1	0	0	0	145687	0	0	0	0	0	0	0	0	0	0	0	0	1.20916e+06	0	1.74982e+06	3.96076e+07	405108	1.2352e+09	4.72939e+06	1.46183e+09	2.14748e+06	8.58346e+08	293521	0	0	2.45612e+06	0	0	0	1.03929e+06	0	565377
0	PE(18:0p/18:1)-H	PE(36:1p)-H	PE	(18:0p/18:1)	(18:0p)	(18:1)			728.56	C41 H79 O7 N1 P1	0	0	0	0	0	0	0	0	0	0	0	0	0	0	0	0	0	0	0	1.52322e+08	0	873077	0	1.99909e+06	0	119940	0	0	0	82665.9	0	0	0	0	0	1.88236e+07
0	PE(18:0p/18:1)+H	PE(36:1p)+H	PE	(18:0p/18:1)	(18:0p)	(18:1)			730.575	C41 H81 O7 N1 P1	0	0	0	0	0	0	0	0	0	0	0	0	0	0	0	0	0	0	44324.7	5.39101e+08	93686.3	2.36285e+06	21733.4	1.7019e+06	0	283707	2.61497e+06	0	0	0	0	0	157896	1.06264e+06	771159	5.69642e+07
0	PE(18:1/18:1)+H	PE(36:2)+H	PE	(18:1/18:1)	(18:1)	(18:1)			744.554	C41 H79 O8 N1 P1	0	0	0	0	0	0	0	0	0	0	0	0	0	0	0	0	0	0	0	0	0	0	0	0	0	0	9.08072e+06	0	4.25714e+06	0	5.04891e+06	0	0	0	0	0
0	PE(18:1/18:1)+H	PE(36:2)+H	PE	(18:1/18:1)	(18:1)	(18:1)			744.554	C41 H79 O8 N1 P1	0	0	0	0	0	0	0	0	0	0	0	0	0	0	0	0	0	0	4.68039e+07	0	458167	0	4648.03	0	377426	0	0	0	0	0	0	0	0	0	1729.36	0
0	PE(18:1/18:1)+H	PE(36:2)+H	PE	(18:1/18:1)	(18:1)	(18:1)			744.554	C41 H79 O8 N1 P1	1.02572e+07	2.17572e+06	2.61177e+08	826935	2.60596e+08	0	2.66811e+08	0	4.86087e+06	0	2.17109e+08	46376	2.71084e+06	0	0	2.91754e+06	1.44052e+06	3.90564e+08	0	0	0	0	0	118605	0	0	0	0	0	282475	0	0	0	0	0	0	744.554	744.554	744.553
0	PE(18:1/18:1)-H	PE(36:2)-H	PE	(18:1/18:1)	(18:1)	(18:1)			742.539	C41 H77 O8 N1 P1	989049	0	1.24719e+08	0	1.2991e+08	0	1.23916e+08	0	3.90785e+06	0	1.1707e+08	0	1.25732e+06	0	0	2.05947e+06	0	1.64663e+08	0	0	0	0	0	0	0	0	0	0	0	143227	0	0	0	0	0	0	742.54		742.54
0	PE(18:1/18:1)+H	PE(36:2)+H	PE	(18:1/18:1)	(18:1)	(18:1)			744.554	C41 H79 O8 N1 P1	0	0	0	0	0	0	0	692.182	0	0	0	0	0	0	0	0	0	128851	0	0	0	0	0	2480.64	0	0	0	0	0	174695	0	5.14014e+07	0	0	0	0
0	PE(18:1/18:1)-H	PE(36:2)-H	PE	(18:1/18:1)	(18:1)	(18:1)			742.539	C41 H77 O8 N1 P1	0	0	0	0	0	0	0	0	0	0	61300.1	0	0	0	0	0	0	1.27733e+06	0	0	0	0	0	0	0	0	0	0	0	59904.2	0	2.27611e+07	0	0	0	0
0	PE(18:1/18:1)+H	PE(36:2)+H	PE	(18:1/18:1)	(18:1)	(18:1)			744.554	C41 H79 O8 N1 P1	0	0	0	0	0	0	121122	0	0	0	0	0	0	0	1.16876e+06	0	0	3075.75	0	0	0	0	0	0	0	0	0	0	373953	5.94444e+08	0	0	0	0	0	0
0	PE(18:1/18:1)-H	PE(36:2)-H	PE	(18:1/18:1)	(18:1)	(18:1)			742.539	C41 H77 O8 N1 P1	0	0	0	0	0	0	0	0	0	0	0	0	0	0	0	0	0	0	0	0	0	0	0	0	0	0	0	0	0	1.921e+08	0	0	0	0	0	0
0	PE(18:1/18:1)+H	PE(36:2)+H	PE	(18:1/18:1)	(18:1)	(18:1)			744.554	C41 H79 O8 N1 P1	0	0	0	0	0	0	0	0	0	0	0	0	0	0	0	0	0	0	43541.7	0	557.421	200420	250023	4488.04	53592.3	0	872.662	2.346e+07	0	0	0	0	0	0	0	0
0	PE(18:1/18:1)-H	PE(36:2)-H	PE	(18:1/18:1)	(18:1)	(18:1)			742.539	C41 H77 O8 N1 P1	0	0	0	0	0	0	0	0	0	0	0	0	0	0	0	0	0	0	0	0	0	0	0	0	0	0	0	1.07162e+07	0	0	0	0	0	0	0	0
0	PE(18:1/18:1)-H	PE(36:2)-H	PE	(18:1/18:1)	(18:1)	(18:1)			742.539	C41 H77 O8 N1 P1	0	0	0	0	0	0	0	0	0	0	0	0	0	0	0	0	0	0	0	0	0	8329.24	0	0	0	9.18375e+07	0	0	0	0	0	0	0	0	0	0
0	PE(18:1/18:1)-H	PE(36:2)-H	PE	(18:1/18:1)	(18:1)	(18:1)			742.539	C41 H77 O8 N1 P1	0	0	0	0	0	0	0	0	0	0	0	0	0	0	0	0	0	0	0	4.68968e+07	0	1.00927e+08	0	1.43052e+08	0	0	0	0	0	0	0	0	0	0	0	0
0	PE(18:1/18:1)+H	PE(36:2)+H	PE	(18:1/18:1)	(18:1)	(18:1)			744.554	C41 H79 O8 N1 P1	0	0	0	0	0	0	0	0	0	0	0	0	0	0	0	0	0	0	0	1.91715e+08	0	3.40044e+08	0	4.42708e+08	22385.7	0	0	0	0	0	0	0	0	0	0	0
0	PE(18:1/18:1)+H	PE(36:2)+H	PE	(18:1/18:1)	(18:1)	(18:1)			744.554	C41 H79 O8 N1 P1	0	0	0	0	0	0	0	0	0	0	0	0	0	0	0	0	0	0	0	0	0	0	0	0	0	0	0	0	0	0	0	0	0	0	0	3.72321e+07
0	PE(18:1/18:1)-H	PE(36:2)-H	PE	(18:1/18:1)	(18:1)	(18:1)			742.539	C41 H77 O8 N1 P1	0	0	0	0	0	0	0	0	0	0	0	0	0	0	0	0	0	0	0	2376.65	0	0	0	0	0	0	0	0	0	0	0	0	0	642.716	0	8.04353e+06
0	PE(18:1/18:1)+H	PE(36:2)+H	PE	(18:1/18:1)	(18:1)	(18:1)			744.554	C41 H79 O8 N1 P1	0	0	0	0	0	0	0	0	0	0	0	0	0	0	0	0	0	0	0	0	16649.6	0	0	0	0	0	0	0	0	0	0	0	0	1.09072e+08	0	0
0	PE(18:1/18:1)-H	PE(36:2)-H	PE	(18:1/18:1)	(18:1)	(18:1)			742.539	C41 H77 O8 N1 P1	0	0	0	0	0	0	0	0	0	0	0	0	0	0	0	0	0	0	0	0	0	0	0	0	0	0	0	0	0	0	0	0	0	3.77434e+06	0	0
0	PE(18:1p/18:1)-H	PE(36:2p)-H	PE	(18:1p/18:1)	(18:1p)	(18:1)			726.544	C41 H77 O7 N1 P1	0	232029	0	0	0	0	0	0	0	0	0	0	0	0	972013	0	298792	0	0	0	0	0	0	0	0	0	0	0	0	0	0	0	0	0	0	0		726.544
0	PE(18:1p/18:1)+H	PE(36:2p)+H	PE	(18:1p/18:1)	(18:1p)	(18:1)			728.559	C41 H79 O7 N1 P1	0	6.77715e+06	0	431585	0	0	0	0	0	0	0	0	0	0	1.43666e+07	0	4.28526e+06	0	0	0	0	0	2350.65	0	0	0	0	0	0	0	0	0	0	0	0	0		728.559
0	PE(18:1p/18:1)-H	PE(36:2p)-H	PE	(18:1p/18:1)	(18:1p)	(18:1)			726.544	C41 H77 O7 N1 P1	0	0	0	0	0	0	0	0	0	0	0	0	0	0	0	0	0	0	0	0	0	0	0	0	0	0	51357.4	0	0	0	1.34164e+06	0	0	0	0	0
0	PE(18:1p/18:1)+H	PE(36:2p)+H	PE	(18:1p/18:1)	(18:1p)	(18:1)			728.559	C41 H79 O7 N1 P1	0	0	0	0	0	0	0	0	0	0	0	0	0	0	42678.1	0	0	0	0	0	0	0	0	0	0	0	5.78453e+06	0	1.019e+07	0	418355	0	0	0	0	0
0	PE(18:1p/18:1)-H	PE(36:2p)-H	PE	(18:1p/18:1)	(18:1p)	(18:1)			726.544	C41 H77 O7 N1 P1	0	0	0	0	0	0	0	0	0	0	0	0	0	0	0	0	0	0	1.05833e+06	0	780889	0	0	0	127871	0	0	0	0	0	0	0	0	0	31101.6	0
0	PE(18:1p/18:1)+H	PE(36:2p)+H	PE	(18:1p/18:1)	(18:1p)	(18:1)			728.559	C41 H79 O7 N1 P1	0	0	0	0	0	0	0	0	0	0	0	0	0	0	0	0	0	0	6.64734e+07	0	52551.4	0	194963	0	1370.22	0	0	0	0	0	0	0	0	0	32202.3	0
0	PE(18:1p/18:1)-H	PE(36:2p)-H	PE	(18:1p/18:1)	(18:1p)	(18:1)			726.544	C41 H77 O7 N1 P1	1.02076e+07	0	3.09537e+08	0	3.51914e+08	0	3.50083e+08	0	5.55266e+06	0	3.02567e+08	0	1.16939e+06	0	0	1.64611e+06	0	4.42205e+08	0	0	0	0	0	0	0	0	0	0	0	0	0	65746.9	0	0	0	0	726.545		726.545
0	PE(18:1p/18:1)+H	PE(36:2p)+H	PE	(18:1p/18:1)	(18:1p)	(18:1)			728.559	C41 H79 O7 N1 P1	1.3301e+07	0	6.1251e+08	0	6.49973e+08	0	5.67457e+08	0	8.18938e+06	0	4.80458e+08	0	2.83347e+06	0	0	2.29605e+06	0	8.44968e+08	0	3.06824e+06	0	2.30448e+07	0	2.12929e+07	0	0	0	0	0	0	0	0	0	0	0	0	728.559		728.558
1	PE(16:0p/20:2)-H	PE(36:2p)-H	PE	(16:0p/20:2)	(16:0p)	(20:2)			726.544	C41 H77 O7 N1 P1	113534	0	9.60348e+06	0	1.3341e+07	0	2.80589e+07	0	5.35793e+06	0	2.06808e+08	0	461002	0	0	1.80215e+06	0	2.64059e+07	0	0	0	0	0	0	0	0	0	0	0	1.41438e+06	0	81868	0	0	0	0	726.544		726.544
1	PE(16:0p/20:2)+H	PE(36:2p)+H	PE	(16:0p/20:2)	(16:0p)	(20:2)			728.559	C41 H79 O7 N1 P1	7.72e+06	0	4.01577e+08	0	1.22598e+08	0	900064	0	4.97347e+06	0	743199	0	38816.9	0	0	2.92247e+06	0	5.91872e+07	0	1.59575e+07	0	1.29033e+07	0	3.3817e+06	0	0	0	0	0	1.7749e+06	36589	0	0	0	0	0	728.559		728.559
0	PE(18:1p/18:1)-H	PE(36:2p)-H	PE	(18:1p/18:1)	(18:1p)	(18:1)			726.544	C41 H77 O7 N1 P1	0	0	1638.41	0	29942.7	0	4151.05	0	0	0	0	0	979.719	0	0	0	0	302872	0	0	0	0	0	0	0	0	0	0	0	973740	0	3.69879e+07	0	0	0	0			726.544
0	PE(18:1p/18:1)+H	PE(36:2p)+H	PE	(18:1p/18:1)	(18:1p)	(18:1)			728.559	C41 H79 O7 N1 P1	0	0	0	0	0	0	3196.94	0	0	0	0	0	0	0	0	0	0	11800.2	0	3143.01	0	0	0	0	0	0	0	0	0	2.08357e+06	0	6.58422e+07	0	0	0	3.05397e+06
0	PE(18:1p/18:1)-H	PE(36:2p)-H	PE	(18:1p/18:1)	(18:1p)	(18:1)			726.544	C41 H77 O7 N1 P1	0	0	202.698	0	68101.1	0	0	0	3809.83	0	0	0	0	0	0	69615.6	0	251674	0	0	0	0	0	0	0	0	0	0	0	5.94817e+08	0	560192	0	0	0	0			726.544
0	PE(18:1p/18:1)+H	PE(36:2p)+H	PE	(18:1p/18:1)	(18:1p)	(18:1)			728.559	C41 H79 O7 N1 P1	0	0	0	0	0	0	0	0	0	0	0	0	0	0	0	0	0	0	0	0	0	0	0	0	0	0	0	0	0	1.66144e+09	0	0	0	344651	0	0
0	PE(18:1p/18:1)-H	PE(36:2p)-H	PE	(18:1p/18:1)	(18:1p)	(18:1)			726.544	C41 H77 O7 N1 P1	0	0	0	0	0	0	0	0	0	0	0	0	0	0	0	0	0	0	0	0	0	0	0	0	0	246.908	0	2.01179e+07	0	0	0	0	0	0	0	0
0	PE(18:1p/18:1)+H	PE(36:2p)+H	PE	(18:1p/18:1)	(18:1p)	(18:1)			728.559	C41 H79 O7 N1 P1	0	0	0	0	0	0	0	0	0	0	0	0	0	0	0	0	0	0	0	0	0	0	0	0	0	2454.15	0	4.35109e+07	0	0	0	0	0	0	0	0
0	PE(18:1p/18:1)-H	PE(36:2p)-H	PE	(18:1p/18:1)	(18:1p)	(18:1)			726.544	C41 H77 O7 N1 P1	0	0	0	0	0	1639.9	0	0	0	0	0	0	0	0	0	0	0	0	0	0	0	2135.74	0	569352	0	2.69348e+08	0	0	0	0	0	0	0	0	0	0
0	PE(18:1p/18:1)+H	PE(36:2p)+H	PE	(18:1p/18:1)	(18:1p)	(18:1)			728.559	C41 H79 O7 N1 P1	0	0	0	0	0	92255.4	0	0	0	0	0	0	0	0	41751.1	0	0	0	0	0	0	3.59538e+06	0	2.21594e+06	0	6.37428e+08	0	0	0	0	0	0	0	0	0	0
0	PE(18:1p/18:1)-H	PE(36:2p)-H	PE	(18:1p/18:1)	(18:1p)	(18:1)			726.544	C41 H77 O7 N1 P1	0	0	0	0	0	0	0	0	0	0	0	0	0	0	0	0	0	0	0	1.21019e+08	0	3.29376e+08	0	3.78975e+08	0	133009	0	0	0	0	0	0	0	0	0	0
0	PE(18:1p/18:1)+H	PE(36:2p)+H	PE	(18:1p/18:1)	(18:1p)	(18:1)			728.559	C41 H79 O7 N1 P1	0	1.59954e+06	101699	494886	0	0	0	0	0	0	0	0	0	0	0	0	1.70246e+07	0	0	4.33046e+08	0	1.0153e+09	0	1.14218e+09	0	0	0	0	0	494662	0	0	0	0	0	0		728.559	728.559
1	PE(18:1p/18:1)-H	PE(36:2p)-H	PE	(18:1p/18:1)	(18:1p)	(18:1)			726.544	C41 H77 O7 N1 P1	0	0	0	0	0	0	0	0	0	0	0	0	0	0	0	0	0	0	0	100341	0	0	0	2689.22	0	0	0	0	0	0	0	0	0	0	0	1.2455e+07
1	PE(18:1p/18:1)+H	PE(36:2p)+H	PE	(18:1p/18:1)	(18:1p)	(18:1)			728.559	C41 H79 O7 N1 P1	0	0	0	0	0	0	0	0	0	0	0	0	0	0	0	0	0	32962.8	0	606791	0	0	0	337232	0	0	0	0	0	0	0	0	0	0	0	4.13253e+07
0	PE(18:1p/18:1)-H	PE(36:2p)-H	PE	(18:1p/18:1)	(18:1p)	(18:1)			726.544	C41 H77 O7 N1 P1	1.02392e+07	0	3.28503e+08	0	3.63506e+08	26952.4	1.71147e+08	0	5.78388e+06	0	3.00665e+08	0	2.16241e+06	0	0	2.11519e+06	0	4.69854e+08	0	1.22301e+08	0	3.45719e+08	0	4.10048e+08	0	2.74224e+08	0	2.04392e+07	0	6.32369e+08	0	3.91724e+07	0	1.12538e+07	0	1.25412e+07
0	PE(18:1p/18:1)+H	PE(36:2p)+H	PE	(18:1p/18:1)	(18:1p)	(18:1)			728.559	C41 H79 O7 N1 P1	0	0	0	0	0	0	0	0	0	0	0	0	0	0	0	0	0	0	0	0	0	323540	0	10943.9	0	0	0	0	0	0	0	0	0	1.28535e+08	0	0
0	PE(18:1/18:2)+H	PE(36:3)+H	PE	(18:1/18:2)	(18:1)	(18:2)			742.538	C41 H77 O8 N1 P1	217251	0	1.30054e+07	0	1.17827e+07	0	554827	0	0	0	7.94265e+06	0	0	0	0	0	0	1.96825e+07	0	0	0	0	0	0	0	37332.3	0	108149	0	0	0	2.4124e+06	0	0	0	0	742.538		742.538
0	PE(18:1/18:2)-H	PE(36:3)-H	PE	(18:1/18:2)	(18:1)	(18:2)			740.524	C41 H75 O8 N1 P1	2480.1	0	5.66426e+06	0	4.90616e+06	0	5.09323e+06	0	0	0	17484.6	0	0	0	0	0	0	7.52652e+06	0	0	0	0	0	0	0	0	0	0	0	0	0	0	0	0	0	0	740.524		740.524
0	PE(18:1/18:2)+H	PE(36:3)+H	PE	(18:1/18:2)	(18:1)	(18:2)			742.538	C41 H77 O8 N1 P1	0	0	549164	0	397608	0	564749	0	0	0	261335	0	0	0	0	166825	0	2.76833e+06	0	256843	0	292058	0	150874	0	669019	0	0	0	1.67364e+06	0	1.70122e+06	0	0	0	0			742.538
0	PE(18:1/18:2)-H	PE(36:3)-H	PE	(18:1/18:2)	(18:1)	(18:2)			740.524	C41 H75 O8 N1 P1	0	0	0	0	0	0	0	0	0	0	0	0	0	0	0	0	0	0	0	0	0	0	0	0	0	0	0	0	0	6.78171e+06	0	25617.6	0	0	0	0
0	PE(16:0/20:3)+H	PE(36:3)+H	PE	(16:0/20:3)	(16:0)	(20:3)			742.538	C41 H77 O8 N1 P1	0	0	0	0	0	0	0	0	0	0	0	25498.8	0	0	0	0	0	0	0	0	0	0	0	0	0	4.55214e+07	0	173921	0	259672	0	0	0	0	0	0
0	PE(18:1/18:2)+H	PE(36:3)+H	PE	(18:1/18:2)	(18:1)	(18:2)			742.538	C41 H77 O8 N1 P1	0	0	0	0	0	0	0	0	0	0	0	193931	0	48987.7	0	0	52038.4	0	0	6.51437e+06	0	7.75508e+06	0	1.24246e+07	0	660526	0	278975	0	255845	95288.4	0	0	0	0	0
0	PE(18:1/18:2)-H	PE(36:3)-H	PE	(18:1/18:2)	(18:1)	(18:2)			740.524	C41 H75 O8 N1 P1	0	0	0	0	0	0	0	0	0	0	0	0	0	0	0	0	0	0	0	3.32094e+06	0	5.18457e+06	0	1.00943e+07	0	0	0	0	0	0	0	0	0	0	0	0
1	PE(18:2p/18:1)+H	PE(36:3p)+H	PE	(18:2p/18:1)	(18:2p)	(18:1)			726.543	C41 H77 O7 N1 P1	1.08228e+06	0	3.26939e+07	0	3.50507e+07	0	4.06698e+07	0	282076	0	2.10551e+07	0	82718.7	0	0	86876.8	0	4.31503e+07	0	0	0	0	0	0	0	0	0	0	0	0	0	0	0	0	0	0	726.543		726.543
1	PE(18:2p/18:1)-H	PE(36:3p)-H	PE	(18:2p/18:1)	(18:2p)	(18:1)			724.529	C41 H75 O7 N1 P1	607073	0	2.31347e+07	0	1.98466e+07	0	1.35798e+07	0	132553	0	1.42399e+07	0	0	0	0	77760.8	0	3.22509e+07	0	0	0	0	0	0	0	0	7838.84	0	0	0	0	0	0	0	0	0	724.529		724.529
1	PE(18:2p/18:1)+H	PE(36:3p)+H	PE	(18:2p/18:1)	(18:2p)	(18:1)			726.543	C41 H77 O7 N1 P1	0	0	1.45409e+06	0	0	0	354095	0	0	0	43483.9	0	0	0	0	0	0	291087	0	0	0	0	0	0	0	0	0	0	0	0	0	7.74144e+06	0	0	0	0			726.543
0	PE(18:1p/18:2)+H	PE(36:3p)+H	PE	(18:1p/18:2)	(18:1p)	(18:2)			726.543	C41 H77 O7 N1 P1	0	0	187831	0	0	0	0	0	0	0	0	0	0	0	0	0	0	3.19121e+06	0	0	0	0	0	0	0	0	0	0	0	9.71437e+07	0	1.59415e+06	0	0	0	0
0	PE(18:2p/18:1)+H	PE(36:3p)+H	PE	(18:2p/18:1)	(18:2p)	(18:1)			726.543	C41 H77 O7 N1 P1	0	0	0	0	0	0	0	0	0	0	0	0	0	0	0	0	0	0	0	0	0	1058.66	0	366693	0	4.40431e+07	0	3540.35	0	0	0	0	0	0	0	0
1	PE(18:2p/18:1)-H	PE(36:3p)-H	PE	(18:2p/18:1)	(18:2p)	(18:1)			724.529	C41 H75 O7 N1 P1	0	0	0	0	0	0	0	0	0	0	0	0	0	0	0	0	16975.8	0	0	7.27431e+06	0	3.35724e+07	0	5.16042e+07	0	467356	0	0	0	0	0	0	0	0	0	0
1	PE(18:2p/18:1)+H	PE(36:3p)+H	PE	(18:2p/18:1)	(18:2p)	(18:1)			726.543	C41 H77 O7 N1 P1	0	0	0	0	0	0	0	0	0	0	0	0	0	0	0	0	109930	0	0	9.07382e+07	0	5.36551e+07	0	2.09504e+08	0	792974	0	0	0	0	0	0	0	0	0	0
0	PE(16:0p/20:3)-H	PE(36:3p)-H	PE	(16:0p/20:3)	(16:0p)	(20:3)			724.529	C41 H75 O7 N1 P1	0	0	0	0	0	0	0	0	0	0	0	0	0	0	0	0	0	0	0	4.83323e+06	0	869.053	0	2688.97	0	0	0	0	0	0	0	0	0	0	0	0
0	PE(16:0p/20:3)+H	PE(36:3p)+H	PE	(16:0p/20:3)	(16:0p)	(20:3)			726.543	C41 H77 O7 N1 P1	0	0	0	0	0	0	0	0	0	0	0	0	0	0	0	0	0	0	0	1.18546e+07	0	571469	0	0	0	13323.3	0	0	1461.09	0	0	0	0	0	0	0
0	PE(16:0/20:4)+H	PE(36:4)+H	PE	(16:0/20:4)	(16:0)	(20:4)			740.522	C41 H75 O8 N1 P1	0	0	0	0	0	0	0	0	0	0	0	0	0	0	0	0	0	0	0	0	0	0	0	0	0	0	1.00455e+07	0	4.68654e+06	0	319709	0	0	0	0	0
0	PE(16:0/20:4)-H	PE(36:4)-H	PE	(16:0/20:4)	(16:0)	(20:4)			738.508	C41 H73 O8 N1 P1	0	0	0	0	0	0	0	0	0	0	0	0	0	0	0	0	0	0	103204	0	0	0	0	0	2.84049e+06	0	0	0	0	0	0	0	0	0	531778	0
0	PE(16:0/20:4)+H	PE(36:4)+H	PE	(16:0/20:4)	(16:0)	(20:4)			740.522	C41 H75 O8 N1 P1	0	0	0	0	0	0	0	0	0	0	0	0	0	0	0	0	0	0	5.06971e+06	0	0	0	92434.7	0	0	0	0	0	0	0	0	0	0	0	0	0
0	PE(16:0/20:4)-H	PE(36:4)-H	PE	(16:0/20:4)	(16:0)	(20:4)			738.508	C41 H73 O8 N1 P1	5.27425e+06	0	8.85508e+07	0	6.97604e+07	0	7.11241e+07	0	2.70618e+06	0	5.84033e+07	0	840420	0	0	977895	0	772617	0	0	0	0	0	0	0	0	0	0	0	61905.1	0	0	0	0	0	0	738.509		738.509
0	PE(16:0/20:4)+H	PE(36:4)+H	PE	(16:0/20:4)	(16:0)	(20:4)			740.522	C41 H75 O8 N1 P1	8.29423e+06	0	4.77982e+08	0	3.81043e+08	0	3.29413e+08	0	1.8499e+06	0	3.49228e+08	0	819011	0	0	1.78719e+06	0	7.55671e+08	0	0	52597.9	0	16547.1	0	0	0	0	0	0	0	0	0	0	0	0	0	740.521		740.521
0	PE(16:0/20:4)-H	PE(36:4)-H	PE	(16:0/20:4)	(16:0)	(20:4)			738.508	C41 H73 O8 N1 P1	0	0	3294.91	0	0	0	0	0	0	0	0	0	0	0	0	0	0	936925	0	0	0	0	0	0	0	0	0	0	0	0	0	1.5774e+07	0	0	0	0			738.508
0	PE(16:0/20:4)+H	PE(36:4)+H	PE	(16:0/20:4)	(16:0)	(20:4)			740.522	C41 H75 O8 N1 P1	0	0	0	0	0	36057.4	0	0	0	0	0	0	0	0	0	0	0	0	13524.5	0	9509.18	0	0	6109.18	0	0	668.622	0	0	63619.5	0	2.75567e+08	0	0	0	0
0	PE(16:0/20:4)+H	PE(36:4)+H	PE	(16:0/20:4)	(16:0)	(20:4)			740.522	C41 H75 O8 N1 P1	0	0	569.233	0	0	0	0	0	0	0	0	0	520.162	0	0	0	0	2.74884e+06	0	0	0	0	0	0	0	0	0	0	0	1.21582e+09	0	0	39943.4	0	0	0			740.522
0	PE(16:0/20:4)-H	PE(36:4)-H	PE	(16:0/20:4)	(16:0)	(20:4)			738.508	C41 H73 O8 N1 P1	0	0	0	0	0	0	0	0	0	0	0	0	0	0	0	0	0	0	0	0	0	0	0	0	0	0	0	0	0	1.22202e+08	0	0	0	0	0	0
0	PE(16:0/20:4)-H	PE(36:4)-H	PE	(16:0/20:4)	(16:0)	(20:4)			738.508	C41 H73 O8 N1 P1	0	0	0	0	0	0	0	0	0	0	0	0	0	0	0	0	0	0	0	0	0	0	0	0	0	0	0	4.95384e+06	0	0	0	0	0	0	0	0
0	PE(16:0/20:4)+H	PE(36:4)+H	PE	(16:0/20:4)	(16:0)	(20:4)			740.522	C41 H75 O8 N1 P1	0	0	0	0	0	0	4240.92	0	0	0	0	0	0	0	0	0	0	0	0	0	0	0	0	0	0	0	0	8.6375e+06	0	0	0	0	0	0	0	0
0	PE(16:0/20:4)+H	PE(36:4)+H	PE	(16:0/20:4)	(16:0)	(20:4)			740.522	C41 H75 O8 N1 P1	0	0	0	0	0	0	0	0	0	0	0	0	0	0	0	0	0	0	0	0	0	1771.1	0	187741	0	1.77707e+08	0	317580	0	0	0	0	0	0	0	0
0	PE(16:0/20:4)-H	PE(36:4)-H	PE	(16:0/20:4)	(16:0)	(20:4)			738.508	C41 H73 O8 N1 P1	0	0	0	0	0	0	127639	0	0	0	0	0	0	0	0	0	0	0	0	0	0	0	0	0	0	6.56066e+07	0	0	0	0	0	0	0	0	0	0
0	PE(16:0/20:4)+H	PE(36:4)+H	PE	(16:0/20:4)	(16:0)	(20:4)			740.522	C41 H75 O8 N1 P1	0	0	0	0	0	0	0	0	0	0	0	0	0	0	0	0	173941	0	0	1.09361e+08	0	1.65184e+08	0	2.79304e+08	0	8.43945e+06	0	0	0	0	0	0	0	0	0	0
0	PE(16:0/20:4)-H	PE(36:4)-H	PE	(16:0/20:4)	(16:0)	(20:4)			738.508	C41 H73 O8 N1 P1	0	0	0	0	0	0	0	0	0	0	0	0	0	0	0	0	0	0	0	3.50937e+07	0	5.76737e+07	0	1.05233e+08	0	0	0	0	0	515924	0	712293	0	0	0	0
0	PE(16:0/20:4)-H	PE(36:4)-H	PE	(16:0/20:4)	(16:0)	(20:4)			738.508	C41 H73 O8 N1 P1	0	0	0	0	0	0	0	0	0	0	0	0	0	0	0	0	0	0	0	0	0	0	0	0	0	0	0	0	0	0	0	0	0	0	0	5.16692e+06
0	PE(16:0/20:4)+H	PE(36:4)+H	PE	(16:0/20:4)	(16:0)	(20:4)			740.522	C41 H75 O8 N1 P1	0	0	0	0	0	0	0	0	0	0	0	0	0	0	0	0	0	0	0	0	0	426927	0	485853	0	0	0	0	0	0	0	0	0	111505	0	1.4425e+07
0	PE(16:0/20:4)-H	PE(36:4)-H	PE	(16:0/20:4)	(16:0)	(20:4)			738.508	C41 H73 O8 N1 P1	0	0	0	0	0	0	0	0	0	0	0	0	0	0	0	0	0	0	0	0	0	0	0	0	0	23728	0	1590.36	0	0	0	0	0	1.08948e+07	0	0
0	PE(16:0/20:4)+H	PE(36:4)+H	PE	(16:0/20:4)	(16:0)	(20:4)			740.522	C41 H75 O8 N1 P1	0	0	0	0	0	0	0	0	0	0	0	0	0	0	0	0	0	0	0	0	0	0	0	0	0	0	0	0	0	0	0	0	0	6.35746e+07	0	3537.56
0	PE(16:0e/20:4)-H	PE(36:4e)-H	PE	(16:0e/20:4)	(16:0e)	(20:4)			724.529	C41 H75 O7 N1 P1	227046	0	1.74685e+07	0	1.35181e+07	0	1.73987e+07	0	289124	0	1.51116e+07	0	0	0	0	82608.9	0	2.36058e+07	0	0	0	0	0	0	0	0	7838.84	0	0	0	0	0	0	0	0	0	724.529		724.529
0	PE(16:0e/20:4)-H	PE(36:4e)-H	PE	(16:0e/20:4)	(16:0e)	(20:4)			724.529	C41 H75 O7 N1 P1	0	0	271244	0	179031	0	692524	0	0	0	345548	0	991.196	0	0	0	0	1.66146e+06	0	0	0	0	0	0	0	0	0	0	0	0	0	3.20405e+06	0	0	0	0			724.529
0	PE(16:0e/20:4)-H	PE(36:4e)-H	PE	(16:0e/20:4)	(16:0e)	(20:4)			724.529	C41 H75 O7 N1 P1	0	0	0	0	0	0	0	0	0	0	0	0	0	0	0	0	16987.5	0	0	5.4041e+06	0	3.44562e+07	0	5.00606e+07	0	141032	0	0	0	0	0	0	0	0	0	0
0	PE(16:0p/20:4)-H	PE(36:4p)-H	PE	(16:0p/20:4)	(16:0p)	(20:4)			722.513	C41 H73 O7 N1 P1	0	0	0	0	0	0	0	0	0	0	0	0	0	0	0	0	0	0	0	0	0	0	0	0	0	0	18718.1	0	1.52081e+06	0	8722.83	0	0	0	0	0
0	PE(16:0p/20:4)-H	PE(36:4p)-H	PE	(16:0p/20:4)	(16:0p)	(20:4)			722.513	C41 H73 O7 N1 P1	11797.2	0	3.04821e+08	0	2.02449e+08	0	2.00325e+08	0	9.19743e+06	0	1.68689e+08	0	2.23201e+06	0	0	3.64499e+06	0	3.38166e+08	0	0	0	0	0	0	0	0	0	0	0	0	0	0	0	0	0	0	722.514		722.513
0	PE(16:0p/20:4)+H	PE(36:4p)+H	PE	(16:0p/20:4)	(16:0p)	(20:4)			724.528	C41 H75 O7 N1 P1	1.07303e+07	0	6.1945e+08	0	4.14399e+08	0	4.38172e+08	0	1.43937e+07	0	3.12528e+08	0	4.80899e+06	0	2.57887e+06	161196	0	6.53114e+08	0	0	0	0	0	0	0	0	0	0	1.5648e+06	0	0	1.32113e+06	0	0	0	123105	724.528		724.528
0	PE(16:0p/20:4)-H	PE(36:4p)-H	PE	(16:0p/20:4)	(16:0p)	(20:4)			722.513	C41 H73 O7 N1 P1	0	0	0	0	0	0	0	0	0	0	0	0	0	0	0	0	0	0	0	0	0	0	0	0	0	0	0	0	0	223460	0	4.16044e+07	0	0	0	0
0	PE(16:0p/20:4)-H	PE(36:4p)-H	PE	(16:0p/20:4)	(16:0p)	(20:4)			722.513	C41 H73 O7 N1 P1	0	0	0	0	0	0	0	0	0	0	0	0	0	0	0	0	0	0	0	0	0	0	0	0	0	0	0	0	0	2.6615e+08	0	0	0	0	0	0
0	PE(16:0p/20:4)+H	PE(36:4p)+H	PE	(16:0p/20:4)	(16:0p)	(20:4)			724.528	C41 H75 O7 N1 P1	0	0	539332	0	3319.21	0	0	0	0	0	0	0	0	0	0	747.556	0	1.97259e+07	0	58972	0	0	206.356	0	0	0	0	0	0	7.5942e+08	0	0	0	0	0	0			724.528
0	PE(36:4p)+H	PE(36:4p)+H	PE	(36:4p)	(36:4p)				724.528	C41 H75 O7 N1 P1	0	0	0	0	0	0	0	0	0	0	0	0	0	0	0	0	0	0	1.43373e+06	0	19843.2	0	850.175	0	57488.5	280.563	620138	0	0	0	0	9.72281e+06	0	0	15591.2	0
0	PE(16:0p/20:4)-H	PE(36:4p)-H	PE	(16:0p/20:4)	(16:0p)	(20:4)			722.513	C41 H73 O7 N1 P1	0	0	0	0	0	0	0	0	0	0	0	0	0	0	0	0	0	0	0	7997.9	0	0	0	0	0	0	0	9.88405e+06	0	0	0	0	0	0	0	0
0	PE(16:0p/20:4)+H	PE(36:4p)+H	PE	(16:0p/20:4)	(16:0p)	(20:4)			724.528	C41 H75 O7 N1 P1	0	0	0	0	0	0	0	0	0	0	0	0	0	0	0	0	0	0	0	216137	0	0	0	88163	0	0	0	2.61147e+07	0	0	0	0	0	275.648	0	0
0	PE(16:0p/20:4)-H	PE(36:4p)-H	PE	(16:0p/20:4)	(16:0p)	(20:4)			722.513	C41 H73 O7 N1 P1	0	0	0	0	0	0	0	0	0	0	0	0	0	0	0	0	0	0	0	0	0	0	0	0	0	2.0809e+08	0	0	0	0	0	0	0	0	0	0
0	PE(16:0p/20:4)+H	PE(36:4p)+H	PE	(16:0p/20:4)	(16:0p)	(20:4)			724.528	C41 H75 O7 N1 P1	0	0	0	0	0	0	0	0	0	0	0	0	0	0	0	0	0	0	0	0	0	542537	0	66761.6	0	1.0813e+09	0	8.62333e+06	0	0	0	0	0	0	0	0
0	PE(16:0p/20:4)-H	PE(36:4p)-H	PE	(16:0p/20:4)	(16:0p)	(20:4)			722.513	C41 H73 O7 N1 P1	0	0	0	0	0	0	0	0	0	0	0	0	0	0	0	0	0	0	0	1.07209e+08	0	478592	0	0	0	0	0	0	0	0	0	0	0	0	0	0
0	PE(16:0p/20:4)+H	PE(36:4p)+H	PE	(16:0p/20:4)	(16:0p)	(20:4)			724.528	C41 H75 O7 N1 P1	0	0	0	0	102593	0	0	0	94701.7	0	0	0	0	0	0	0	0	0	0	8.69226e+08	0	1.60735e+09	0	2.46974e+09	0	1.9321e+07	0	0	0	0	0	0	0	42210.3	0	0
0	PE(16:0p/20:4)-H	PE(36:4p)-H	PE	(16:0p/20:4)	(16:0p)	(20:4)			722.513	C41 H73 O7 N1 P1	0	0	0	0	0	0	0	0	0	0	0	0	0	0	0	0	0	0	0	0	0	0	0	0	0	0	0	0	0	0	0	0	0	0	0	1.29548e+07
0	PE(16:0p/20:4)-H	PE(36:4p)-H	PE	(16:0p/20:4)	(16:0p)	(20:4)			722.513	C41 H73 O7 N1 P1	0	0	0	0	0	0	0	0	0	0	0	0	0	0	0	0	0	0	0	0	0	0	0	0	0	0	0	0	0	0	0	0	0	1.04484e+07	0	0
0	PE(16:0p/20:4)+H	PE(36:4p)+H	PE	(16:0p/20:4)	(16:0p)	(20:4)			724.528	C41 H75 O7 N1 P1	0	0	61042.8	0	235.61	0	14044.6	0	9412.52	0	16184.1	0	0	0	0	0	0	36097.6	0	0	0	0	0	0	0	0	0	0	0	0	0	0	0	6.4079e+07	0	0			724.528
0	PE(16:1/20:4)-H	PE(36:5)-H	PE	(16:1/20:4)	(16:1)	(20:4)			736.492	C41 H71 O8 N1 P1	0	0	7550.61	0	1.31693e+06	0	1.59458e+06	0	0	0	1.39701e+06	0	0	0	0	0	0	3566.41	0	0	0	0	0	0	0	0	0	0	0	0	0	0	0	0	0	0			736.492
0	PE(16:1/20:4)-H	PE(36:5)-H	PE	(16:1/20:4)	(16:1)	(20:4)			736.492	C41 H71 O8 N1 P1	0	0	0	0	0	0	0	0	0	0	0	0	0	0	0	0	0	0	0	0	0	0	0	0	0	0	0	0	0	1.98209e+06	0	0	0	0	0	0
0	PE(16:1/20:4)+H	PE(36:5)+H	PE	(16:1/20:4)	(16:1)	(20:4)			738.507	C41 H73 O8 N1 P1	2600.6	0	4541.66	0	493147	0	0	0	0	0	376959	0	132845	0	0	0	79620.7	15080.4	0	0	0	0	232368	6272.36	0	0	0	0	0	4.90471e+06	0	0	0	0	0	0	738.507		738.507
0	PE(16:1/20:4)+H	PE(36:5)+H	PE	(16:1/20:4)	(16:1)	(20:4)			738.507	C41 H73 O8 N1 P1	0	0	0	0	0	0	0	0	0	0	63538.3	0	0	0	17315.5	0	0	0	263967	41062.5	48835.6	1.5134e+06	103700	3.9207e+06	0	0	214785	66230.2	0	0	18052.1	0	0	93488.2	0	0
0	PE(16:0p/20:5)+H	PE(36:5p)+H	PE	(16:0p/20:5)	(16:0p)	(20:5)			722.512	C41 H73 O7 N1 P1	1866.74	1.13921e+06	841684	0	6.18775e+06	0	5.7091e+06	0	1635.04	0	2.11359e+06	0	2.64041e+07	0	20687.6	74162.8	0	3.19945e+06	0	2.86983e+06	0	6224.14	0	0	0	0	0	0	455064	1.00479e+06	988067	234264	0	584.496	0	110401	722.512	722.512	722.517
0	PE(18:0p/19:1)-H	PE(37:1p)-H	PE	(18:0p/19:1)	(18:0p)	(19:1)			742.576	C42 H81 O7 N1 P1	831.355	0	2.77443e+06	0	1.96374e+06	0	3.1837e+06	0	1304.5	0	2.55848e+06	0	904.485	0	0	0	0	3.25644e+06	0	0	0	0	0	0	0	0	0	0	0	0	0	0	0	0	0	0	742.576		742.576
0	PE(18:0p/19:1)+H	PE(37:1p)+H	PE	(18:0p/19:1)	(18:0p)	(19:1)			744.59	C42 H83 O7 N1 P1	0	0	1.24031e+07	0	1.29935e+07	79533.5	2.81192e+06	0	2560.86	0	6.7803e+06	0	0	0	0	0	0	4.88878e+06	0	0	0	0	0	0	0	0	0	0	0	4.84427e+06	0	0	0	0	0	215454			744.59
0	PE(18:0p/19:1)-H	PE(37:1p)-H	PE	(18:0p/19:1)	(18:0p)	(19:1)			742.576	C42 H81 O7 N1 P1	0	0	0	0	0	0	0	0	0	0	0	0	0	0	0	0	0	13914.8	0	0	0	0	0	0	0	0	0	0	0	9.2595e+06	0	964116	0	0	0	0
0	PE(18:0p/19:1)+H	PE(37:1p)+H	PE	(18:0p/19:1)	(18:0p)	(19:1)			744.59	C42 H83 O7 N1 P1	0	1935.34	0	0	0	0	0	0	0	0	0	0	0	0	87050.9	0	0	0	0	0	0	0	0	0	0	0	0	2.90346e+06	0	2.01797e+07	0	0	0	0	0	0		744.59
1	PE(18:0p/19:1)-H	PE(37:1p)-H	PE	(18:0p/19:1)	(18:0p)	(19:1)			742.576	C42 H81 O7 N1 P1	0	0	0	0	0	0	0	0	0	0	0	0	0	0	0	0	0	0	0	83449.9	0	645301	0	24088.8	0	2.02278e+06	0	0	0	0	0	0	0	0	0	0
0	PE(18:0p/19:1)-H	PE(37:1p)-H	PE	(18:0p/19:1)	(18:0p)	(19:1)			742.576	C42 H81 O7 N1 P1	0	0	0	0	0	0	0	0	0	0	0	0	0	0	0	0	0	0	0	2.74078e+06	0	2.43334e+06	0	1.65342e+07	0	1.00955e+06	0	0	0	0	0	0	0	0	0	0
0	PE(17:0/20:4)+H	PE(37:4)+H	PE	(17:0/20:4)	(17:0)	(20:4)			754.538	C42 H77 O8 N1 P1	2191.48	0	8.77691e+06	0	9.19693e+06	0	12872	0	0	0	6.67966e+06	0	0	0	13163.8	0	118785	83075.5	0	0	0	0	0	0	0	0	0	0	0	0	0	7.56468e+06	8107.75	0	0	0	754.538		754.537
0	PE(17:0/20:4)-H	PE(37:4)-H	PE	(17:0/20:4)	(17:0)	(20:4)			752.524	C42 H75 O8 N1 P1	0	0	0	0	4.26744e+06	0	4.08493e+06	0	0	0	2.74964e+06	0	0	0	0	0	0	0	0	0	0	0	0	0	0	0	0	0	0	0	0	39838.5	0	0	0	0
0	PE(18:0p/20:0)-H	PE(38:0p)-H	PE	(18:0p/20:0)	(18:0p)	(20:0)			758.607	C43 H85 O7 N1 P1	0	0	6.29474e+06	0	4.18672e+06	0	5.00272e+06	0	0	0	5.71736e+06	0	0	0	0	0	0	7.39433e+06	0	0	0	0	0	0	0	0	0	0	0	0	0	277409	0	0	0	0			758.607
0	PE(18:0p/20:0)+H	PE(38:0p)+H	PE	(18:0p/20:0)	(18:0p)	(20:0)			760.621	C43 H87 O7 N1 P1	0	0	1.86925e+07	0	1.31671e+07	0	14996196	0	0	0	1.23707e+07	0	0	0	0	0	0	3.03365e+07	0	0	0	0	0	0	0	0	0	4.12654e+06	0	385356	0	2.95517e+06	0	0	0	0			760.621
0	PE(18:0p/20:0)-H	PE(38:0p)-H	PE	(18:0p/20:0)	(18:0p)	(20:0)			758.607	C43 H85 O7 N1 P1	0	0	0	0	0	0	0	0	0	0	0	0	0	0	0	0	0	0	0	0	0	0	0	0	0	0	0	0	0	1.49612e+07	0	0	0	0	0	0
0	PE(18:0p/20:0)+H	PE(38:0p)+H	PE	(18:0p/20:0)	(18:0p)	(20:0)			760.621	C43 H87 O7 N1 P1	0	0	0	0	0	0	0	0	0	0	0	0	0	0	0	0	0	0	0	0	0	0	0	0	0	3.77713e+06	0	36691.7	0	7.48269e+07	0	0	0	0	0	0
0	PE(18:0p/20:0)-H	PE(38:0p)-H	PE	(18:0p/20:0)	(18:0p)	(20:0)			758.607	C43 H85 O7 N1 P1	0	0	0	0	0	0	0	0	0	0	0	0	0	0	0	0	32012.9	0	0	3.49874e+06	0	8.70604e+06	0	1.40936e+07	0	8.20688e+06	0	0	23581	0	0	0	0	0	0	0
0	PE(18:0p/20:0)+H	PE(38:0p)+H	PE	(18:0p/20:0)	(18:0p)	(20:0)			760.621	C43 H87 O7 N1 P1	0	0	0	0	0	0	0	0	0	0	0	0	0	0	0	0	0	0	0	3.13915e+07	0	3.62983e+07	0	5.3557e+07	0	2.30486e+07	0	0	0	102831	0	0	0	1.86347e+07	0	1.35873e+06
1	PE(18:0p/20:0)-H	PE(38:0p)-H	PE	(18:0p/20:0)	(18:0p)	(20:0)			758.607	C43 H85 O7 N1 P1	0	0	0	0	0	0	0	0	0	0	0	0	0	0	0	0	24724.2	0	0	3.60042e+06	0	2.06946e+07	0	1.8315e+07	0	1.81294e+06	0	0	30309.6	0	0	0	0	0	0	131319
0	PE(18:0/20:1)+H	PE(38:1)+H	PE	(18:0/20:1)	(18:0)	(20:1)			774.601	C43 H85 O8 N1 P1	317419	1.85605e+06	7.32214e+07	3.34855e+06	5.88658e+07	0	4.85409e+07	0	173539	0	4.5312e+07	0	0	0	0	0	3.63794e+06	6.83573e+07	0	0	0	0	0	0	0	0	0	0	0	6.28992e+08	0	370200	0	325307	0	0	774.601	774.601	774.6
0	PE(18:0/20:1)-H	PE(38:1)-H	PE	(18:0/20:1)	(18:0)	(20:1)			772.586	C43 H83 O8 N1 P1	727236	0	1.58634e+07	0	1.58612e+07	0	1.45927e+07	0	0	0	1.58082e+07	0	103077	0	0	0	0	2.2958e+07	0	0	0	0	0	0	0	0	0	0	0	248785	24856.5	259072	0	0	0	0	772.586		772.587
0	PE(18:0/20:1)+H	PE(38:1)+H	PE	(18:0/20:1)	(18:0)	(20:1)			774.601	C43 H85 O8 N1 P1	0	0	0	0	0	0	0	0	0	0	0	0	0	0	0	0	0	0	0	0	0	0	0	0	0	0	0	111858	0	1.31008e+08	0	0	0	0	0	0
0	PE(18:0/20:1)-H	PE(38:1)-H	PE	(18:0/20:1)	(18:0)	(20:1)			772.586	C43 H83 O8 N1 P1	0	0	0	0	0	0	0	0	0	0	0	0	0	0	0	0	0	0	0	0	0	0	0	0	0	0	0	0	0	4.36839e+07	0	6.74797e+06	0	0	13748.9	0
0	PE(18:0/20:1)-H	PE(38:1)-H	PE	(18:0/20:1)	(18:0)	(20:1)			772.586	C43 H83 O8 N1 P1	0	0	0	0	0	0	0	0	0	0	0	0	0	0	0	0	0	0	0	0	0	0	0	0	0	0	0	2.34372e+06	0	0	0	0	0	0	0	0
0	PE(18:0/20:1)+H	PE(38:1)+H	PE	(18:0/20:1)	(18:0)	(20:1)			774.601	C43 H85 O8 N1 P1	0	0	0	0	0	0	0	0	0	0	0	0	0	0	0	0	0	0	974923	1.79341e+08	644766	5.66397e+07	3.05169e+06	1.00362e+08	1.6517e+06	5.91175e+07	799913	0	0	441197	0	0	192546	0	0	1.79897e+06
0	PE(18:0/20:1)-H	PE(38:1)-H	PE	(18:0/20:1)	(18:0)	(20:1)			772.586	C43 H83 O8 N1 P1	0	0	0	0	0	0	0	0	0	0	0	0	0	0	0	0	0	0	0	7.12225e+06	0	1.99454e+07	0	2.07437e+07	0	1.30174e+07	0	0	0	0	0	0	0	0	0	943577
0	PE(18:0/20:1)-H	PE(38:1)-H	PE	(18:0/20:1)	(18:0)	(20:1)			772.586	C43 H83 O8 N1 P1	0	0	0	0	74724.2	0	0	0	0	0	0	0	0	0	0	0	0	0	0	9.22503e+06	0	23937.1	0	0	0	0	0	0	0	0	0	0	0	0	0	88457.6
0	PE(18:0p/20:1)-H	PE(38:1p)-H	PE	(18:0p/20:1)	(18:0p)	(20:1)			756.591	C43 H83 O7 N1 P1	0	0	0	0	0	0	0	0	0	0	0	0	0	0	1.98724e+06	0	0	0	0	0	0	0	0	0	0	0	0	0	0	0	0	0	0	0	0	0
0	PE(18:0p/20:1)-H	PE(38:1p)-H	PE	(18:0p/20:1)	(18:0p)	(20:1)			756.591	C43 H83 O7 N1 P1	0	0	0	0	0	0	0	0	0	0	0	0	0	0	0	0	0	0	0	0	0	0	0	0	0	0	0	0	0	0	1.37769e+06	0	0	0	0	0
0	PE(18:0p/20:1)-H	PE(38:1p)-H	PE	(18:0p/20:1)	(18:0p)	(20:1)			756.591	C43 H83 O7 N1 P1	0	0	0	0	0	0	0	0	0	0	0	0	0	0	0	0	0	0	839937	0	407.222	0	0	0	1.00311e+06	0	0	0	0	0	0	0	0	0	57658.3	0
0	PE(18:0p/20:1)-H	PE(38:1p)-H	PE	(18:0p/20:1)	(18:0p)	(20:1)			756.591	C43 H83 O7 N1 P1	4.85091e+06	0	1.02786e+08	0	1.08437e+08	0	1.05066e+08	0	1.16607e+06	0	1.03539e+08	0	476760	0	0	405111	0	1.30559e+08	0	0	0	0	0	0	0	0	0	0	0	0	0	333567	0	0	0	27432.8	756.592		756.592
0	PE(18:0p/20:1)+H	PE(38:1p)+H	PE	(18:0p/20:1)	(18:0p)	(20:1)			758.606	C43 H85 O7 N1 P1	6.47051e+06	19346	527502	0	2.76618e+08	0	2.33573e+08	0	3.24264e+06	0	2.15362e+08	0	1.07339e+06	80658.8	0	978240	0	1.25592e+06	0	170357	0	0	0	0	0	0	0	0	0	2.02154e+06	0	1.29784e+06	0	0	0	0	758.606		758.604
0	PE(18:0p/20:1)-H	PE(38:1p)-H	PE	(18:0p/20:1)	(18:0p)	(20:1)			756.591	C43 H83 O7 N1 P1	0	0	0	0	0	0	0	0	0	0	0	0	0	0	0	0	0	0	0	0	0	0	0	0	0	0	0	0	0	2.79767e+08	0	1.65886e+07	0	0	0	0
0	PE(18:0p/20:1)+H	PE(38:1p)+H	PE	(18:0p/20:1)	(18:0p)	(20:1)			758.606	C43 H85 O7 N1 P1	0	0	305541	0	0	0	0	0	0	0	0	0	0	0	0	0	0	0	0	0	0	0	0	0	0	1.79952e+06	0	0	0	9.70235e+08	0	3.59739e+07	0	0	0	0			758.606
0	PE(18:0p/20:1)-H	PE(38:1p)-H	PE	(18:0p/20:1)	(18:0p)	(20:1)			756.591	C43 H83 O7 N1 P1	0	0	0	0	0	0	0	0	0	0	0	0	0	0	0	0	0	0	0	5.3184e+06	0	1.56318e+08	0	1.88717e+08	0	1.43604e+08	0	0	0	0	0	0	0	0	0	0
0	PE(18:0p/20:1)+H	PE(38:1p)+H	PE	(18:0p/20:1)	(18:0p)	(20:1)			758.606	C43 H85 O7 N1 P1	0	0	0	0	102421	0	0	0	0	0	0	0	0	0	0	0	0	0	59234.7	1.88175e+07	20424.5	4.85931e+08	105688	5.62034e+08	37853.9	3.14236e+08	70393.5	0	0	0	0	0	0	380783	0	0
0	PE(18:0p/20:1)-H	PE(38:1p)-H	PE	(18:0p/20:1)	(18:0p)	(20:1)			756.591	C43 H83 O7 N1 P1	0	0	0	0	0	0	0	0	0	0	0	0	0	0	0	0	0	0	0	6.87771e+07	0	398523	0	1.58602e+06	0	0	0	0	0	0	0	0	0	0	0	532294
0	PE(18:0p/20:1)+H	PE(38:1p)+H	PE	(18:0p/20:1)	(18:0p)	(20:1)			758.606	C43 H85 O7 N1 P1	0	0	0	0	0	0	398.499	0	0	0	0	0	0	0	0	0	0	0	0	1.99102e+08	0	4.4015e+06	0	687313	0	6501.81	0	0	0	0	149427	0	0	0	0	4134.6
0	PE(38:2)+H	PE(38:2)+H	PE	(38:2)	(38:2)				772.585	C43 H83 O8 N1 P1	0	817983	0	1024.28	0	0	0	0	0	0	0	0	0	0	81314.7	0	5317.49	0	102593	0	660041	0	0	0	1.48596e+06	0	0	0	0	0	0	0	42356.8	0	390641	0		772.586
[truncated: 1,305 more rows]
[truncated: 105 more columns]
