# Supplementary material for: Disposition of Proteins and Lipids in Synaptic Membrane Compartments Is Altered in Q175/Q7 Huntington’s Disease Mouse Striatum
Source: Front Synaptic Neurosci. 2021 Mar 18;13:618391. doi: 10.3389/fnsyn.2021.618391 (PMC8013775; doi:10.3389/fnsyn.2021.618391)
Supplement: Supplementary file 3 [file Data_Sheet_3.xls]

## Sheet: mergeResult (38)
Sample	Animal number and fraction	Genotype
#[c-1]:121818Pcs38032.raw	3803 F2	Q175/Q7
#[c-10]:121818Pcs28561.raw	2856 F1	Q7/Q7
#[c-11]:121818Pcs28542.raw	2854 F2	Q7/Q7
#[c-12]:121818Pcs28541.raw	2854 F1	Q7/Q7
#[c-13]:121818Pcs13572.raw	1357 F2	Q7/Q7
#[c-14]:121818Pcs13571.raw	1357 F1	Q7/Q7
#[c-15]:121818Pcs13412.raw	1341 F2	Q7/Q7
#[c-16]:121818Pcs13411.raw	1341 F1	Q7/Q7
#[c-17]:121818Pcs13342.raw	1334 F2	Q7/Q7
#[c-18]:121818Pcs13341.raw	1334 F1	Q7/Q7
#[c-19]:121818Pcs13072.raw	1307 F2	Q7/Q7
#[c-2]:121818Pcs38031.raw	3803 F1	Q175/Q7
#[c-20]:121818Pcs13071.raw	1307 F1	Q7/Q7
#[c-21]:121818Pcs12912.raw	1291 F2	Q7/Q7
#[c-22]:121818Pcs12911.raw	1291 F1	Q7/Q7
#[c-23]:121818Pcs12902.raw	1290 F2	Q7/Q7
#[c-24]:121818Pcs12901.raw	1290 F1	Q7/Q7
#[c-25]:121818Pcs12252.raw	1225 F2	Q175/Q7
#[c-26]:121818Pcs12251.raw	1225 F1	Q175/Q7
#[c-27]:121818Pcs12242.raw	1124 F2	Q175/Q7
#[c-28]:121818Pcs12241.raw	1124 F1	Q175/Q7
#[c-29]:121818Pcs12232.raw	1123 F2	Q175/Q7
#[c-3]:121818Pcs34862.raw	3486 F2	Q175/Q7
#[c-30]:121818Pcs12231.raw	1223 F1	Q175/Q7
#[c-31]:121818Pcs12202.raw	1220 F2	Q175/Q7
#[c-32]:121818Pcs12201.raw	1220 F1	Q175/Q7
#[c-33]:121818Pcs11362.raw	1136 F2	Q175/Q7
#[c-34]:121818Pcs11361.raw	1136 F1	Q175/Q7
#[c-35]:121818Pcs11322.raw	1132 F2	Q175/Q7
#[c-36]:121818Pcs11321.raw	1132 F1	Q175/Q7
#[c-4]:121818Pcs34861.raw	3486 F1	Q175/Q7
#[c-5]:121818Pcs28962.raw	2896 F2	Q175/Q7
#[c-6]:121818Pcs28961.raw	2896 F1	Q175/Q7
#[c-7]:121818Pcs28852.raw	2885 F2	Q7/Q7
#[c-8]:121818Pcs28851.raw	2885 F1	Q7/Q7
#[c-9]:121818Pcs28562.raw	2856 F2	Q7/Q7
#normalize base:
#control group:c
#toprank filter:true
#mScoreThreshold:3.0
#cScoreThreshold:2.0
Rej.	LipidIon	LipidGroup	Class	FattyAcid	FA1	FA2	FA3	FA4	CalcMz	IonFormula	Area[c-1]	Area[c-2]	Area[c-3]	Area[c-4]	Area[c-5]	Area[c-6]	Area[c-7]	Area[c-8]	Area[c-9]	Area[c-10]	Area[c-11]	Area[c-12]	Area[c-13]	Area[c-14]	Area[c-15]	Area[c-16]	Area[c-17]	Area[c-18]	Area[c-19]	Area[c-20]	Area[c-21]	Area[c-22]	Area[c-23]	Area[c-24]	Area[c-25]	Area[c-26]	Area[c-27]	Area[c-28]	Area[c-29]	Area[c-30]	Area[c-31]	Area[c-32]	Area[c-33]	Area[c-34]	Area[c-35]	Area[c-36]	ObsMz[c-1]	ObsMz[c-2]	ObsMz[c-3]
0	AcCa(12:0)+H	AcCa(12:0)+H	AcCa	(12:0)	(12:0)				344.28	C19 H38 O4 N1	1.80077e+06	1.08201e+06	1.46245e+06	5.06201e+06	778336	5.49177e+06	5.08032e+06	3.21551e+06	4.37748e+06	1.37261e+06	5.42798e+06	3.60049e+06	6.5785e+06	8.19468e+06	3.17221e+06	575812	3.14937e+06	6.20778e+06	6.94175e+06	2.90363e+06	2.17353e+06	524593	2.14119e+06	552919	4.21025e+06	1.67618e+06	1.42826e+07	3.69085e+06	3.91707e+06	3.7269e+06	1.37872e+06	3.42565e+06	4.14125e+06	4.98952e+06	8.68954e+06	2.8172e+06	344.28	344.28	344.28
1	AcCa(12:3)+H	AcCa(12:3)+H	AcCa	(12:3)	(12:3)				338.233	C19 H32 O4 N1	867337	8.80435e+06	3.55738e+06	4.89905e+06	1.47012e+07	2.61327e+06	2.69017e+06	2.41198e+06	5.26742e+06	3.14707e+06	2.81506e+07	3.60346e+07	4.29016e+07	1.34322e+06	7.11038e+06	6.36108e+06	1.69866e+07	2.16149e+07	1.28722e+06	1.15843e+07	7.08141e+07	5.62649e+06	1.47789e+07	2.75083e+06	6.19713e+06	2.19093e+07	1.79143e+07	1.36372e+07	2.00867e+07	4.26723e+06	6.87917e+06	1.29688e+07	3.28115e+07	1.20551e+08	990514	3.12313e+07	338.233	338.233	338.233
1	AcCa(12:3)+H	AcCa(12:3)+H	AcCa	(12:3)	(12:3)				338.233	C19 H32 O4 N1	1.00339e+07	2.41254e+07	2.05418e+07	2.3235e+07	4.58535e+07	1.74703e+06	2.73179e+07	9.4419e+06	1.02364e+07	2.0938e+07	2.33466e+06	4.70098e+06	1.54557e+08	9.83218e+06	1.51406e+07	4.35252e+07	1.40339e+07	2.4012e+08	1.15055e+07	3.95123e+07	3.26489e+07	1.39814e+07	7.43239e+06	1.96777e+07	7.46509e+07	1.37536e+08	9.61604e+07	4.83442e+07	2.40974e+07	8.92572e+06	2.08107e+07	2.22434e+06	9.08626e+06	2.61194e+08	4.62055e+06	8.57635e+06		338.233	338.233
0	AcCa(12:3)+H	AcCa(12:3)+H	AcCa	(12:3)	(12:3)				338.233	C19 H32 O4 N1	3.31477e+08	3.42782e+08	8.63198e+07	2.24591e+08	1.63431e+08	1.24985e+08	3.64467e+08	1.24001e+08	1.17124e+08	3.95916e+08	1.45756e+08	4.71597e+08	3.43005e+08	7.41424e+06	1.51069e+07	1.84465e+08	2.12591e+08	4.88514e+08	1.31841e+08	4.74198e+07	5.43279e+08	1.19449e+08	9.87284e+07	9.09093e+06	3.57221e+08	2.15181e+08	3.42937e+08	3.43626e+07	2.96485e+08	1.01521e+07	8.67919e+06	1.36308e+08	5.26341e+08	4.88796e+08	8.68671e+07	4.9057e+08	338.233	338.233	338.233
1	AcCa(12:3)+H	AcCa(12:3)+H	AcCa	(12:3)	(12:3)				338.233	C19 H32 O4 N1	3.78432e+07	8.47236e+06	2.80748e+07	4.0818e+06	1.88187e+07	8.37611e+06	4.13683e+06	3.39346e+07	1.14504e+07	1.60948e+07	1.62301e+07	5.86923e+06	2.11381e+06	7.01117e+06	2.7459e+07	1.49173e+07	1.20613e+07	8.8665e+06	1.76392e+07	5.59002e+06	1.546e+07	4.52506e+06	6.13255e+06	2.24517e+07	3.30339e+06	5.88647e+07	9.07545e+06	6.6094e+06	1.46927e+06	1.36488e+07	1.18994e+07	1.09192e+07	2.45759e+07	1.90209e+07	2.94581e+07	1.0491e+07	338.233	338.233
1	AcCa(12:3)+H	AcCa(12:3)+H	AcCa	(12:3)	(12:3)				338.233	C19 H32 O4 N1	5.58139e+07	9.9469e+07	4.86927e+06	1.8727e+08	7.50316e+06	6.36758e+06	1.64933e+07	2.34185e+06	8.7989e+07	8.43186e+07	1.14713e+07	1.75973e+07	1.45746e+08	7.54558e+07	2.00546e+07	3.15256e+07	2.81381e+06	1.72314e+08	1.03592e+08	1.21603e+08	7.33963e+07	1.8848e+08	1.64683e+07	6.97573e+06	8.41836e+07	1.52449e+07	2.96081e+07	4.5693e+07	3.44663e+07	5.21948e+07	7.77279e+07	3.61453e+07	1.05033e+08	1.04616e+08	3.09571e+07	4.62654e+07			338.233
1	AcCa(12:3)+H	AcCa(12:3)+H	AcCa	(12:3)	(12:3)				338.233	C19 H32 O4 N1	1.01133e+08	6.86971e+07	2.29732e+07	9.86032e+07	1.27541e+08	9.30429e+07	2.18695e+08	1.55305e+08	2.88214e+07	4.69785e+07	4.7886e+07	1.22796e+08	2.29705e+07	8.87655e+07	6.92843e+07	2.01364e+08	7.43747e+07	7.38914e+07	2.44739e+07	2.11744e+08	9.39851e+07	1.87721e+07	6.30565e+07	6.80461e+07	5.97763e+07	1.98379e+08	6.96036e+07	5.95271e+07	8.17249e+07	1.03596e+08	1.1771e+08	1.08353e+08	9.83899e+07	2.10053e+08	1.29383e+08	6.61522e+07	338.233	338.233	338.233
0	AcCa(12:3)+H	AcCa(12:3)+H	AcCa	(12:3)	(12:3)				338.233	C19 H32 O4 N1	1.83313e+09	1.60783e+07	1.966e+09	1.97639e+09	6.66528e+08	1.99891e+09	1.9487e+09	2.09667e+09	2.01591e+09	2.03349e+09	6.59001e+08	9.16777e+08	7.61769e+08	2.00091e+09	2.02916e+09	1.76696e+09	1.98005e+09	1.65543e+09	2.05383e+09	1.64415e+09	1.72772e+09	1.68693e+09	2.08503e+09	1.94767e+09	2.03067e+09	8.71366e+08	1.91958e+09	2.054e+09	1.98987e+09	2.01852e+09	2.00479e+09	2.06191e+09	1.12195e+09	1.68804e+09	4.06272e+06	1.90651e+09	338.233	338.232	338.233
0	AcCa(14:0)+H	AcCa(14:0)+H	AcCa	(14:0)	(14:0)				372.311	C21 H42 O4 N1	3.44333e+06	824541	552642	2.11465e+06	479918	2.67985e+06	1.3668e+06	473856	941463	492011	621794	540116	6.49109e+06	3.64349e+06	1.54223e+06	1.38348e+06	1.39743e+06	1.18273e+07	1.37035e+06	521516	5.91201e+06	613741	2.20979e+06	2481.18	1.12856e+06	1.99242e+06	2.83794e+06	1.45233e+06	3.05559e+06	1.39952e+06	1.09421e+06	2.54366e+06	2.30764e+06	9.8011e+06	204648	2.0668e+06	372.311	372.311	372.311
0	AcCa(16:0)+H	AcCa(16:0)+H	AcCa	(16:0)	(16:0)				400.342	C23 H46 O4 N1	9.32514e+06	5.46456e+06	1.58274e+06	3.8857e+06	1.45425e+06	4.68011e+06	4.2956e+06	1.68221e+06	1.93217e+06	4.65885e+06	3059454	3.02175e+06	1.73727e+07	1.32779e+07	4.49502e+06	2.42698e+06	4.89843e+06	3.90623e+07	3.85487e+06	2.01686e+06	2.69726e+07	2.47199e+06	1.65868e+06	2.23596e+06	3.7617e+06	5.18965e+06	6.74165e+06	1.23209e+06	5.10161e+06	3.43119e+06	3.1587e+06	3.31832e+06	6.39066e+06	3.07082e+07	1.38118e+06	6.28204e+06	400.342	400.342	400.342
0	AcCa(18:0)+H	AcCa(18:0)+H	AcCa	(18:0)	(18:0)				428.373	C25 H50 O4 N1	1.88731e+06	1.16393e+06	92952.1	1.61741e+06	33653.1	590283	1.22697e+06	363485	471798	1.90976e+06	51900.1	681695	3.07102e+06	3.34419e+06	1.14553e+06	525113	1.42479e+06	8.05809e+06	336070	350600	4.89347e+06	655454	505602	427976	643783	1.50007e+06	2.06306e+06	57095.9	1.29514e+06	830331	1.03647e+06	512438	1.83534e+06	5.89601e+06	311372	1.74808e+06	428.373	428.373	428.373
0	AcCa(18:1)+H	AcCa(18:1)+H	AcCa	(18:1)	(18:1)				426.358	C25 H48 O4 N1	5.06991e+06	2.11819e+06	624236	1.90824e+06	259070	3.26388e+06	2.47531e+06	219272	1.25234e+06	3.56955e+06	1.17881e+06	1.56962e+06	9.65712e+06	7.62893e+06	2.84774e+06	200700	2.66854e+06	2.00867e+07	764366	489841	1.28667e+07	891673	816503	300985	1.45895e+06	2.91671e+06	3.18359e+06	302532	2.3408e+06	910406	1.78211e+06	1.4635e+06	3.33976e+06	1.57389e+07	117675	3.43272e+06	426.358	426.358	426.358
1	AcCa(20:3)+H	AcCa(20:3)+H	AcCa	(20:3)	(20:3)				450.358	C27 H48 O4 N1	1.04415e+08	4.55132e+08	1.13128e+08	1.27932e+08	2.48851e+07	4.52548e+08	4.01867e+08	1.01527e+08	1.04805e+08	1.2235e+08	1.20887e+08	4.42719e+08	1.04185e+08	1.12164e+08	1.06453e+08	1.08929e+08	1.07936e+08	1.15907e+08	4.46068e+08	1.34463e+08	5.3994e+07	1.26857e+08	4.31388e+08	1.2702e+08	1.05804e+08	1.17849e+08	1.15238e+08	1.00559e+08	1.03131e+08	1.14336e+08	1.17908e+08	4.65554e+08	1.09909e+08	1.30867e+08	4.35387e+08	4.64533e+08	450.358	450.358	450.358
0	AcCa(20:3)+H	AcCa(20:3)+H	AcCa	(20:3)	(20:3)				450.358	C27 H48 O4 N1	2.0045e+08	2.21774e+08	4.68192e+08	4.5517e+08	8.94386e+07	3.77955e+08	4.02378e+08	4.36779e+08	4.30013e+08	2.27913e+08	1.98641e+08	1.29465e+08	2.13585e+08	4.36528e+08	2.3928e+08	1.99183e+08	7.56143e+07	7.91613e+07	4.49195e+08	4.87599e+08	2.20051e+08	4.61378e+08	4.61861e+08	1.05195e+08	2.21644e+08	2.02607e+08	2.29818e+08	8.72323e+07	2.30048e+08	1.94173e+08	2.04196e+08	2.21254e+08	1.74676e+08	2.53242e+08	8.64403e+07	2.18312e+08	450.358	450.357
1	AcCa(20:3)+H	AcCa(20:3)+H	AcCa	(20:3)	(20:3)				450.358	C27 H48 O4 N1	6.09875e+07	9.51504e+07	8.59263e+07	7.14075e+07	7.39782e+07	9.84046e+07	5.28416e+08	7.19179e+07	6.42541e+07	1.18458e+08	5.99968e+07	1.2073e+08	8.8979e+07	1.25721e+08	5.78611e+07	7.84205e+07	6.80605e+07	7.80336e+07	1.18648e+08	9.25929e+07	9.42718e+07	1.02245e+08	7.41402e+07	9.80326e+07	6.44052e+07	6.65958e+07	5.29712e+07	8.76984e+07	8.59915e+07	4.98908e+07	4.86198e+07	7.21606e+07	7.65966e+07	6.00751e+07	6.03603e+07	6.04284e+07
0	AcCa(20:3)+H	AcCa(20:3)+H	AcCa	(20:3)	(20:3)				450.358	C27 H48 O4 N1	1.77098e+07	1.29865e+07	1.57819e+07	1.50308e+08	745830	4.23034e+07	2.42418e+06	1.32691e+07	1.60331e+07	1.2503e+07	2.72361e+07	1.13535e+07	9.73108e+07	1.18477e+07	1.1689e+07	8.60968e+06	1.05457e+08	1.06791e+08	2.43335e+08	7.45081e+06	8.05601e+07	1.94912e+08	2.86502e+06	1.71446e+07	5.16889e+06	7.48339e+06	6.4993e+06	3.2196e+06	8.76712e+07	2.15994e+07	6.08624e+06	1.44461e+08	1.31892e+08	2.326e+07	1.09202e+08	1.02244e+08	450.358		450.358
1	AcCa(20:3)+H	AcCa(20:3)+H	AcCa	(20:3)	(20:3)				450.358	C27 H48 O4 N1	4.04557e+07	3.62071e+07	4.14073e+06	6.22978e+06	1.44489e+06	1.01752e+07	7.086e+07	3.26127e+06	5.67301e+06	1.62947e+07	7.77552e+06	951379	5.27451e+06	4.39629e+07	1.00709e+07	3.81631e+07	1.03737e+07	5.66478e+06	1.17976e+07	770652	5.36192e+07	3.92636e+07	1.39938e+07	2.9393e+06	1.07879e+07	1.86679e+07	5.06169e+07	1.97841e+06	1.66943e+07	3.01379e+06	2.96143e+06	6.82071e+06	3.1677e+06	1.83573e+07	3.02477e+06	4.02929e+06	450.357	450.358	450.358
1	AcCa(20:3)+H	AcCa(20:3)+H	AcCa	(20:3)	(20:3)				450.358	C27 H48 O4 N1	1.24444e+07	5.02925e+06	974927	4.12676e+06	1.11066e+07	3.1294e+06	1.29839e+07	3.23997e+07	1.65487e+06	9.13103e+06	1.4887e+07	3.83421e+06	1.12124e+07	1.80636e+06	1.79765e+07	3.96067e+06	1.32358e+07	4.51678e+06	6.7284e+06	4.49706e+06	1.48369e+07	2.08257e+06	3.70168e+06	453695	1.46955e+07	1.59857e+07	2.74118e+06	2.72155e+06	3.53044e+06	9.78998e+06	4.02016e+06	3.62179e+06	9.79392e+06	1.77752e+07	1.61244e+07	1.51811e+06	450.358	450.358	450.358
1	AcCa(20:3)+H	AcCa(20:3)+H	AcCa	(20:3)	(20:3)				450.358	C27 H48 O4 N1	7.26471e+06	2.44487e+07	1.81216e+07	1.1513e+07	2.25588e+07	1.97808e+07	4.88635e+06	1.98077e+07	2.97445e+06	2.48571e+07	3.83889e+07	2.98339e+07	1.80242e+07	4.09811e+06	1.8267e+07	2.11512e+07	5.53335e+06	8.34663e+07	2.36491e+07	4.46697e+06	1.13774e+07	4.60895e+06	1.97746e+07	4.79627e+06	3.47343e+06	5.38724e+06	6.03048e+06	8.13251e+06	1.07614e+07	1.54168e+07	1.3019e+07	2.80194e+07	6.84017e+06	1.38093e+07	1.46679e+07	4.15448e+07	450.358	450.358	450.358
1	AcCa(20:3)+H	AcCa(20:3)+H	AcCa	(20:3)	(20:3)				450.358	C27 H48 O4 N1	5.03976e+07	2.72527e+07	3.24073e+06	4.5773e+06	2.79322e+07	1.93397e+07	2.90931e+06	3.00443e+06	1.0845e+07	1.05651e+07	5.17605e+06	1.21096e+06	1.07793e+07	3.04536e+07	1.56957e+07	2.9927e+06	1.1533e+07	9.16729e+06	860362	1.83392e+06	2.12874e+07	9.32435e+06	1.56653e+07	3.9408e+07	6.07613e+06	6.72385e+06	7.81876e+06	17493.9	4.19136e+06	9.29176e+06	6.41532e+07	5.42558e+06	4.84655e+06	7.46079e+06	1.15303e+07	5.25544e+06	450.358	450.358	450.358
0	AcCa(20:4)+H	AcCa(20:4)+H	AcCa	(20:4)	(20:4)				448.342	C27 H46 O4 N1	420259	88593.1	28496.4	117966	487712	533800	344886	0	260404	121723	0	231529	1.59261e+06	533070	113437	0	232814	3.08934e+06	2212.36	0	1.49263e+06	0	75027.2	64377	3047.59	61080.5	449982	58673.5	263430	0	80831.5	290322	210637	2.15944e+06	93284.8	815051	448.342	448.342	448.342
0	BisMePA(14:1/14:1)+NH4	BisMePA(28:2)+NH4	BisMePA	(14:1/14:1)	(14:1)	(14:1)			634.444	C33 H65 O8 N1 P1	0	81706.3	86319.4	346527	965494	0	4069.38	77136.7	109412	95754.4	271555	116166	66479.3	71247.5	0	0	57582.8	3023.58	59905.5	56234.2	63603	1159.68	1168.34	0	1352.6	116925	596.304	0	44916.3	0	76436.6	0	47455.3	193715	87733.4	5720.74		634.444	634.444
0	CL(20:4/18:1/18:1/18:1)-2H	CL(74:7)-2H	CL	(20:4/18:1/18:1/18:1)	(20:4)	(18:1)	(18:1)	(18:1)	738.502	C83 H146 O17 P2	0	56244	0	0	0	0	0	0	0	0	0	0	67647.9	0	204218	0	0	906932	0	0	141129	0	0	0	0	0	323744	0	167320	271755	0	0	164489	502860	0	103445		738.502
0	CL(20:4/18:1/18:1/20:4)-2H	CL(76:10)-2H	CL	(20:4/18:1/18:1/20:4)	(20:4)	(18:1)	(18:1)	(20:4)	749.494	C85 H144 O17 P2	0	0	0	0	0	0	0	0	0	0	0	0	0	0	0	0	0	412034	0	82469.3	226096	0	0	0	0	0	155893	0	0	251870	0	0	233122	322864	87377	102183
0	CL(23:0/16:0/18:0/22:5)-2H	CL(79:5)-2H	CL	(23:0/16:0/18:0/22:5)	(23:0)	(16:0)	(18:0)	(22:5)	775.557	C88 H160 O17 P2	537099	520717	80868.7	289963	80982.4	660679	788178	45836.1	0	728182	96369.2	482072	1.13515e+06	1.52046e+06	464698	382550	947338	8.1134e+06	436152	531693	1.27822e+06	764027	45533.7	503142	787033	698042	1.60026e+06	0	550669	375749	520236	5013.2	268586	2.14769e+06	85283.3	814576		775.557
0	Cer(d16:1+hO/10:0)+H	Cer(d26:1+hO)+H	Cer	(d16:1+hO/10:0)	(d16:1+hO)	(10:0)			442.389	C26 H52 O4 N1	87043.5	0	0	0	0	0	663.295	2017.63	2119.52	1798.35	0	0	1281.3	0	143830	61828.9	55725.1	0	2.33371e+06	0	1635.43	0	0	0	0	459.212	0	0	2927.29	0	61077.4	0	2951.94	1334.88	75795.6	1619.62	442.389
0	Cer(d20:2/6:0)+NH4	Cer(d26:2)+NH4	Cer	(d20:2/6:0)	(d20:2)	(6:0)			441.405	C26 H53 O3 N2	3.30715e+06	3.52249e+06	1.72194e+06	3.59882e+06	1.67563e+06	2.11223e+06	2.89032e+06	1.92221e+06	2.34355e+06	4.45808e+06	2.88768e+06	3.00545e+06	2.36643e+06	3.61746e+06	2.40681e+06	947603	3.0551e+06	4.39502e+06	3.99643e+06	2.11101e+06	3.33622e+06	1.80529e+06	2.37101e+06	2.77575e+06	3.13888e+06	3.88566e+06	2.63251e+06	2.70862e+06	3.1224e+06	2.38666e+06	3.46109e+06	3.61066e+06	1.64517e+06	3.97261e+06	4.301e+06	5.73043e+06	441.405	441.405	441.405
0	Cer(d28:1+hO)+H	Cer(d28:1+hO)+H	Cer	(d28:1+hO)	(d28:1+hO)				470.42	C28 H56 O4 N1	1.35395e+06	84440.4	782057	359118	638868	164940	0	2864.97	507716	316403	275054	1.13418e+06	0	87577.4	1.13487e+06	0	1.30641e+06	168045	8.37153e+06	2368.89	1.52835e+06	788946	154932	88586.4	458748	104247	1726.49	943171	580414	540170	760564	2483.04	1.23149e+06	850993	94709.8	503094	470.42	470.42	470.42
0	Cer(d29:0)+H	Cer(d29:0)+H	Cer	(d29:0)	(d29:0)				470.457	C29 H60 O3 N1	220211	0	214317	0	0	0	0	0	0	0	475882	59782.9	0	0	1.40919e+06	0	256444	63111.9	0	11042.4	152310	0	0	0	0	0	71323.2	905449	253363	189456	664692	247735	0	754140	484314	1.33772e+06	470.457		470.457
0	Cer(d30:1+hO)+H	Cer(d30:1+hO)+H	Cer	(d30:1+hO)	(d30:1+hO)				498.452	C30 H60 O4 N1	145228	130605	6635.28	97702	95612.7	591779	466417	170008	189116	3411.69	165319	458703	191813	95422.2	310666	100683	142691	107498	4.05727e+06	96554.4	599603	119171	59965.8	368380	485354	213476	117752	111300	369944	73174.8	342946	223517	187333	157191	326870	707838	498.452	498.452	498.452
0	Cer(d16:1+hO/16:0)+H	Cer(d32:1+hO)+H	Cer	(d16:1+hO/16:0)	(d16:1+hO)	(16:0)			526.483	C32 H64 O4 N1	351962	3.48154e+06	988707	679182	814634	345886	475597	423455	554590	233095	626851	1.74988e+06	2.15155e+06	2.14263e+06	3.43927e+06	412755	219273	214032	3.18221e+06	197346	390330	163161	580137	391425	371230	194699	916887	150035	295680	183033	696662	376985	462393	372776	464741	143631	526.483	526.483	526.483
0	Cer(d34:0)+H	Cer(d34:0)+H	Cer	(d34:0)	(d34:0)				540.535	C34 H70 O3 N1	1.31612e+06	4.37096e+06	2.37493e+06	1.53399e+06	586294	2.52318e+06	2.06657e+06	1.90707e+06	1.30869e+06	1.52112e+06	1.35283e+06	1.95262e+06	919920	2.72733e+06	1.02313e+06	344689	2.7434e+06	2.71563e+06	1.12108e+06	4.61695e+06	2.64775e+06	2.37649e+06	1.06203e+06	1.25787e+06	1.63291e+06	1.21393e+06	5.40158e+06	853811	2.99109e+06	1.72473e+06	2.83081e+06	1.7479e+06	1.64726e+06	1.75412e+06	1.91486e+06	1.73144e+06	540.535	540.535	540.535
0	Cer(d18:0+pO/16:0)+H-H2O	Cer(d34:0+pO)+H-H2O	Cer	(d18:0+pO/16:0)	(d18:0+pO)	(16:0)			538.519	C34 H68 O3 N1	283863	457728	0	439333	0	540951	683776	133170	0	443890	0	0	2.76553e+06	1.6032e+06	266568	0	2.10444e+06	7.75623e+06	233906	1780.71	6.27511e+06	0	0	143291	583978	152372	280853	0	429495	289234	3079.04	280520	2.49419e+06	4.34625e+06	0	1.19549e+06	538.519	538.519
0	Cer(d18:1/16:0)+HCOO	Cer(d34:1)+HCOO	Cer	(d18:1/16:0)	(d18:1)	(16:0)			582.51	C35 H68 O5 N1	11902.3	519395	0	4343.42	0	115636	221123	0	288770	219233	0	182439	1.76742e+06	766886	302026	267857	1.43219e+06	5.49703e+06	1658.67	353047	2.34587e+06	0	0	0	914183	621276	563811	0	710740	0	164697	183805	988398	3.65911e+06	0	177067	582.51	582.51
0	Cer(d18:0/18:0)+HCOO	Cer(d36:0)+HCOO	Cer	(d18:0/18:0)	(d18:0)	(18:0)			612.557	C37 H74 O5 N1	3012.28	0	0	276253	0	0	89777.7	0	0	270.361	0	2478.12	823508	415432	0	97124.4	2693.46	2.86898e+06	2137.19	0	1.65328e+06	0	98323.1	0	93084.9	335269	147401	0	0	78707.3	209569	0	269594	3226.24	0	277456	612.557
0	Cer(d18:0+pO/18:0)+H-H2O	Cer(d36:0+pO)+H-H2O	Cer	(d18:0+pO/18:0)	(d18:0+pO)	(18:0)			566.551	C36 H72 O3 N1	5.36492e+07	2.55991e+07	1.08923e+07	2.94783e+07	1.02427e+07	2.09997e+07	4.601e+07	9.56488e+06	2.30019e+07	3.78368e+07	1.68354e+07	2.84978e+07	1.39857e+08	9.16993e+07	3.67791e+07	1.13292e+07	7.87499e+07	3.42031e+08	2.74371e+07	2.43864e+07	2.79425e+08	1.35548e+07	1.58042e+07	1.60901e+07	7.10991e+07	4.82809e+07	5.5887e+07	3.19569e+06	5.14851e+07	2.44483e+07	5.17525e+07	2.66319e+07	9.21723e+07	2.18374e+08	1.0047e+07	5.46105e+07	566.551	566.551	566.551
0	Cer(d18:1/18:0)-H	Cer(d36:1)-H	Cer	(d18:1/18:0)	(d18:1)	(18:0)			564.536	C36 H70 O3 N1	84423.3	390857	0	145521	0	65859.1	250523	1718.93	0	118954	0	0	1.6194e+06	1972.48	203369	0	391382	2.3894e+06	71538	0	2.70731e+06	2386.47	0	0	284033	215019	541637	0	182452	0	2093.22	0	141010	1.39066e+06	35968.5	203084	564.536	564.536
0	Cer(d18:1/18:0)+HCOO	Cer(d36:1)+HCOO	Cer	(d18:1/18:0)	(d18:1)	(18:0)			610.542	C37 H72 O5 N1	3.98535e+07	2.20619e+07	8.71657e+06	2.56186e+07	8.26095e+06	1.73709e+07	3.93372e+07	7.86621e+06	1.78274e+07	2.99702e+07	1.39029e+07	2.36609e+07	1.12226e+08	6.98358e+07	3.1771e+07	8.36916e+06	6.688e+07	2.37717e+08	2.53969e+07	1.906e+07	2.05781e+08	8.34687e+06	1.40932e+07	1.196e+07	5.47393e+07	3.56915e+07	4.42295e+07	2.5656e+06	3.85052e+07	2.0964e+07	4.03912e+07	2.11021e+07	7.91815e+07	1.68696e+08	9.53391e+06	4.44263e+07	610.543	610.542	610.542
0	Cer(d18:1/18:0)+H-H2O	Cer(d36:1)+H-H2O	Cer	(d18:1/18:0)	(d18:1)	(18:0)			548.54	C36 H70 O2 N1	4.15266e+06	1.99172e+06	943813	2.064e+06	633035	1.85325e+06	4.07885e+06	899755	1.60476e+06	4.09964e+06	1.34111e+06	2.31709e+06	9.63896e+06	7.33507e+06	3.71267e+06	741437	7.09296e+06	2.13843e+07	2.25172e+06	1.93592e+06	1.71997e+07	1.56058e+06	991672	1.17788e+06	7.40193e+06	5.05773e+06	4.44844e+06	0	3.27485e+06	1.57069e+06	5.3812e+06	2.5522e+06	7.78898e+06	1.80083e+07	725300	5.75998e+06	548.54	548.54	548.54
0	Cer(d18:1+hO/18:0)+H-H2O	Cer(d36:1+hO)+H-H2O	Cer	(d18:1+hO/18:0)	(d18:1+hO)	(18:0)			564.535	C36 H70 O3 N1	3.60151e+06	1.51885e+06	2.28964e+06	3.0331e+06	1.65774e+06	2.40789e+06	5.77403e+06	1.03617e+06	1.66264e+06	3.57499e+06	756592	2.29511e+06	1.28951e+07	1.02643e+07	1.32811e+06	703373	5.66293e+06	2.06446e+07	3.01123e+06	1.45701e+06	2.31722e+07	1.88137e+06	1.97822e+06	3.15296e+06	6.34945e+06	4.36155e+06	1.16551e+07	321709	4.9558e+06	3.04996e+06	5.92153e+06	2.8982e+06	1.18492e+07	1.402e+07	1.70934e+06	4.85742e+06	564.535	564.535	564.535
0	Cer(d18:2/18:0)+HCOO	Cer(d36:2)+HCOO	Cer	(d18:2/18:0)	(d18:2)	(18:0)			608.526	C37 H70 O5 N1	3.39404e+06	1.49337e+06	2.61775e+06	3.26476e+06	1.05003e+06	2.77041e+06	5.14952e+06	1.07686e+06	1.29754e+06	3.73582e+06	1.70306e+06	3.2404e+06	1.5284e+07	7.79287e+06	3.53504e+06	1.33042e+06	7.17234e+06	2.25746e+07	3.37875e+06	595225	2.35575e+07	1.25385e+06	1.6156e+06	1.07529e+06	7.43933e+06	4.87809e+06	6.99252e+06	2966.63	6.97964e+06	3.47996e+06	3.30382e+06	1.94718e+06	8.27536e+06	1.80928e+07	1.46303e+06	5.807e+06	608.527	608.526	608.526
0	Cer(d18:2/18:0)+H	Cer(d36:2)+H	Cer	(d18:2/18:0)	(d18:2)	(18:0)			564.535	C36 H70 O3 N1	1.518e+06	1.56111e+06	2.24899e+06	3.88735e+06	1.67203e+06	2.42663e+06	5.70354e+06	1.69379e+06	1.73347e+06	3.6105e+06	736643	2.29697e+06	1.38559e+07	1.03164e+07	1.26941e+06	698899	5.60916e+06	2.49126e+07	2.91478e+06	6406.6	1.90923e+07	1.86198e+06	2.03883e+06	3.12783e+06	6.41423e+06	4.48296e+06	1.16086e+07	313885	4.93532e+06	3.01488e+06	5.9458e+06	2.85512e+06	1.18366e+07	2.53418e+07	1.72683e+06	4.61629e+06	564.535	564.535	564.535
0	Cer(d18:0+pO/20:0)+H-H2O	Cer(d38:0+pO)+H-H2O	Cer	(d18:0+pO/20:0)	(d18:0+pO)	(20:0)			594.582	C38 H76 O3 N1	4.45686e+06	2.37431e+06	952307	2.83504e+06	132624	1.99946e+06	3.57859e+06	313579	1.75298e+06	2.86669e+06	767507	2.81379e+06	8.87187e+06	6.1362e+06	2.54316e+06	561093	4.38274e+06	2.3103e+07	1.85141e+06	1.39746e+06	1.59097e+07	705981	1.21632e+06	1.11502e+06	3.58182e+06	2.89976e+06	4.8757e+06	0	3.81586e+06	1.57465e+06	3.05227e+06	1.46267e+06	6.06146e+06	1.54553e+07	1.19198e+06	4.9518e+06	594.582	594.582	594.582
0	Cer(d18:1/20:0)+HCOO	Cer(d38:1)+HCOO	Cer	(d18:1/20:0)	(d18:1)	(20:0)			638.573	C39 H76 O5 N1	3.58729e+06	2.53144e+06	415704	2.21097e+06	141471	1.1468e+06	2.49579e+06	424802	1.00638e+06	2.80387e+06	806704	1.25501e+06	7.48129e+06	4.72036e+06	2.41934e+06	597156	3.31075e+06	2.0515e+07	1.77926e+06	1.2361e+06	1.45736e+07	350040	1.06585e+06	500733	2.65041e+06	2.80899e+06	4.19837e+06	0	3.60769e+06	1.2448e+06	2.4374e+06	1.3931e+06	4.38978e+06	1.37774e+07	611691	4.22192e+06	638.573	638.573	638.573
0	Cer(d38:3+pO)+H-H2O	Cer(d38:3+pO)+H-H2O	Cer	(d38:3+pO)	(d38:3+pO)				588.535	C38 H70 O3 N1	21429.9	9.25155e+06	2391.64	8.40086e+06	9703.88	6.98161e+06	26629	19243.7	9.46269e+06	1.22162e+07	7.01227e+06	1.01629e+07	49934.5	2.26615e+07	12624.5	5.63623e+06	45692	2.78991e+07	9.48254e+06	1.22703e+07	2.35457e+07	6.6371e+06	6545.67	6.65226e+06	2.23195e+07	1.34753e+07	1.22479e+07	2659.97	1.36337e+07	8.20677e+06	1.71581e+07	9.42916e+06	2.5107e+07	66464.3	5.13412e+06	1.38012e+07	588.535	588.535	588.535
0	Cer(d16:0/23:1)+HCOO	Cer(d39:1)+HCOO	Cer	(d16:0/23:1)	(d16:0)	(23:1)			652.589	C40 H78 O5 N1	7486.94	0	0	60814.2	0	0	34500.9	0	0	4470.75	65440.6	0	146978	155039	40534.3	0	3426.97	1.49272e+06	0	0	320398	0	0	0	79059.1	2734.44	0	0	48822.1	0	6113.02	0	315120	329355	0	100903	652.589
0	Cer(d18:0+pO/22:0)+H-H2O	Cer(d40:0+pO)+H-H2O	Cer	(d18:0+pO/22:0)	(d18:0+pO)	(22:0)			622.613	C40 H80 O3 N1	513655	147323	0	470136	0	184592	198254	0	129677	216005	0	0	517974	606033	4972.23	0	291060	2.45116e+06	241509	0	1.08214e+06	145148	0	0	452694	259389	877632	0	431227	257439	449793	274028	260124	2.19462e+06	115926	815730	622.613	622.613
0	Cer(d18:1/22:0)+HCOO	Cer(d40:1)+HCOO	Cer	(d18:1/22:0)	(d18:1)	(22:0)			666.604	C41 H80 O5 N1	488925	210589	0	123251	73165.8	0	163404	0	0	1476.34	0	114403	348906	409752	293523	2918.78	144915	3.83324e+06	149168	3309.21	1.56163e+06	0	0	0	183267	101816	661032	65908.7	608965	632.96	163480	192547	575631	1.87421e+06	68054.4	757554	666.604	666.604
0	Cer(d18:1/22:1)+H	Cer(d40:2)+H	Cer	(d18:1/22:1)	(d18:1)	(22:1)			620.598	C40 H78 O3 N1	58699.2	0	0	0	0	0	0	1354.02	0	2605.59	1463.45	190727	9977.85	1.0672e+06	3655.97	0	6951.25	3.75046e+06	0	0	21656.5	0	0	4378.24	0	0	782812	0	3942.17	0	0	0	129070	3.98263e+06	0	4924.39	620.598
0	Cer(d40:3+pO)+H-H2O	Cer(d40:3+pO)+H-H2O	Cer	(d40:3+pO)	(d40:3+pO)				616.566	C40 H74 O3 N1	1.33864e+06	473447	112298	539305	238376	589119	837412	1006.02	504020	951714	262133	992321	2.90454e+06	2.1617e+06	872617	39968.1	2.0887e+06	1.89115e+06	545274	202491	5.01384e+06	0	340266	138011	1.23947e+06	899942	1.4162e+06	0	1.45295e+06	751165	433478	385658	2.16261e+06	3.32268e+06	32724.1	1.30564e+06	616.566	616.566	616.566
0	Cer(d18:1/23:0)+HCOO	Cer(d41:1)+HCOO	Cer	(d18:1/23:0)	(d18:1)	(23:0)			680.62	C42 H82 O5 N1	466892	76013.5	0	130823	0	137746	0	0	0	0	0	0	190701	238196	0	0	0	1.0818e+06	1061.27	0	601162	0	0	0	179657	0	519626	0	243259	3224.78	0	222210	385529	1.10827e+06	0	683747	680.62	680.62
0	Cer(d18:0+pO/24:1)+H-H2O	Cer(d42:1+pO)+H-H2O	Cer	(d18:0+pO/24:1)	(d18:0+pO)	(24:1)			648.629	C42 H82 O3 N1	1.51576e+06	1.09013e+06	1821.55	9116.74	0	497204	383449	0	3999.3	353959	2860.51	309751	2.11531e+06	1.13298e+06	3404.25	0	2231.48	5.86779e+06	475049	270440	3.2984e+06	179903	4712.61	505505	1.21912e+06	783509	1.80026e+06	0	1.56338e+06	202137	552340	3652.64	1.17085e+06	5.00172e+06	0	1.55389e+06	648.629	648.629	648.629
0	Cer(d18:1/24:1)+HCOO	Cer(d42:2)+HCOO	Cer	(d18:1/24:1)	(d18:1)	(24:1)			692.62	C43 H82 O5 N1	1.40107e+06	381274	128157	714961	0	316474	559446	59387.5	69609.7	380107	219951	373377	1.90769e+06	1.69768e+06	430075	1450.27	548918	4.2785e+06	263578	6998.72	3.15215e+06	1983.61	0	205039	777334	854611	1.30045e+06	0	890787	547522	725619	279082	1.85027e+06	4.35984e+06	92401.1	1.26024e+06	692.621	692.62	692.62
0	CerG1(d18:0+pO/16:0)+H-H2O	CerG1(d34:0+pO)+H-H2O	CerG1	(d18:0+pO/16:0)	(d18:0+pO)	(16:0)			700.572	C40 H78 O8 N1	0	0	0	0	0	183585	0	0	0	296748	0	0	973336	0	0	0	0	23927.3	0	0	4.93398e+06	0	0	0	0	0	8924.2	0	0	0	0	0	0	2.45525e+06	0	0
0	CerG1(d18:0+pO/18:0)+H-H2O	CerG1(d36:0+pO)+H-H2O	CerG1	(d18:0+pO/18:0)	(d18:0+pO)	(18:0)			728.603	C42 H82 O8 N1	1.42775e+07	6.46605e+06	2.20065e+06	5.9036e+06	1.80703e+06	5.92586e+06	8.68806e+06	1.17383e+06	2.3995e+06	5.07666e+06	3.1158e+06	7.55259e+06	1.89188e+07	1.82934e+07	7.34158e+06	3.48209e+06	1.0584e+07	9.10145e+07	4.63276e+06	4.64932e+06	5.72819e+07	3.29251e+06	2.74056e+06	4.90355e+06	1.19042e+07	1.21972e+07	1.92076e+07	918397	1.2881e+07	5.18273e+06	5.64569e+06	2.66111e+06	1.12137e+07	6.65031e+07	1.06078e+06	1.20862e+07	728.604	728.603	728.604
0	CerG1(d36:1)+H	CerG1(d36:1)+H	CerG1	(d36:1)	(d36:1)				728.603	C42 H82 O8 N1	1.07642e+06	203921	135429	230370	136520	139536	592650	0	83318.7	604895	0	251794	951623	490867	251566	0	1.06244e+06	178854	269272	128178	3.20248e+06	76542.1	317452	0	446672	835438	491382	0	281927	573067	75323.8	0	388333	3.32534e+06	0	564672	728.604	728.604	728.604
0	CerG1(d18:1/18:0)+H	CerG1(d36:1)+H	CerG1	(d18:1/18:0)	(d18:1)	(18:0)			728.603	C42 H82 O8 N1	1.42111e+07	6.57124e+06	2.16494e+06	5.9812e+06	1.81074e+06	5.89997e+06	8.73313e+06	1.17251e+06	2.32827e+06	5.07928e+06	2.58765e+06	7.53818e+06	1.88563e+07	1.83169e+07	7.34078e+06	3.28822e+06	1.05627e+07	9.17119e+07	4.57681e+06	5.28883e+06	5.70145e+07	3.7019e+06	2.7405e+06	4.68092e+06	1.18835e+07	1.28275e+07	1.90322e+07	943967	1.29202e+07	5.19814e+06	5.73541e+06	2.66592e+06	1.12303e+07	6.65376e+07	1.06049e+06	1.24125e+07	728.604	728.604	728.604
0	CerG1(d18:1/18:0)+H-H2O	CerG1(d36:1)+H-H2O	CerG1	(d18:1/18:0)	(d18:1)	(18:0)			710.593	C42 H80 O7 N1	507475	0	0	86450.2	0	0	197942	0	2657.9	150946	231.852	132624	307314	742869	139193	0	4707.65	2.70888e+06	0	0	2.07107e+06	134025	0	0	310289	0	280589	0	186714	0	112778	0	233531	2.51223e+06	0	0	710.593
0	CerG1(d18:1/18:0+O)+H	CerG1(d36:1+O)+H	CerG1	(d18:1/18:0+O)	(d18:1)	(18:0+O)			744.598	C42 H82 O9 N1	2.39814e+07	1.35601e+07	1.99646e+06	7.39273e+06	4.1234e+06	9.70421e+06	1.12292e+07	2.20592e+06	3.94955e+06	1.05969e+07	4.36753e+06	9.67127e+06	2.90636e+07	2.64273e+07	1.28994e+07	4.35814e+06	1.46492e+07	9.02542e+07	8.02912e+06	1.02453e+07	5.71075e+07	7.08142e+06	4.89828e+06	6.74842e+06	1.66609e+07	1.64838e+07	1.98515e+07	1.64331e+06	1.56241e+07	8.41283e+06	8.40098e+06	4.37296e+06	1.81032e+07	7.44895e+07	2.55942e+06	1.69957e+07	744.598	744.598	744.598
0	CerG1(d36:2)+H	CerG1(d36:2)+H	CerG1	(d36:2)	(d36:2)				726.588	C42 H80 O8 N1	0	0	0	0	0	0	0	0	0	0	0	310181	114458	163437	0	0	107147	367055	0	0	1.5884e+06	0	0	0	0	72402.9	0	0	0	0	0	0	229566	1.4433e+06	0	0
0	CerG1(d37:5+pO)-H	CerG1(d37:5+pO)-H	CerG1	(d37:5+pO)	(d37:5+pO)				748.537	C43 H74 O9 N1	241131	133303	198274	205153	87202.9	215692	348100	0	133392	536375	127710	259936	691031	127210	365492	114852	460128	1.91556e+06	165697	66459.9	1.21563e+06	120647	0	0	312944	74844.9	700333	0	835778	262022	0	0	418305	2.14446e+06	0	438650	748.537	748.537	748.537
0	CerG1(d18:0+pO/20:0)+H-H2O	CerG1(d38:0+pO)+H-H2O	CerG1	(d18:0+pO/20:0)	(d18:0+pO)	(20:0)			756.635	C44 H86 O8 N1	4.18588e+06	1.55599e+06	496292	1.56668e+06	1.17141e+06	2.5174e+06	2.56458e+06	335665	734195	1.482e+06	976900	2.41081e+06	6.02921e+06	5.5576e+06	2.10759e+06	1.05626e+06	3.69109e+06	1.94107e+07	1.73687e+06	4362.65	1.23409e+07	1.35195e+06	1.54116e+06	1.4774e+06	3.83398e+06	3.93978e+06	4.87262e+06	88842.8	3.60794e+06	2.23611e+06	1.8067e+06	1.22632e+06	3.22732e+06	1.57841e+07	476292	4.5275e+06	756.635	756.635	756.635
0	CerG1(d18:1/20:0)+H	CerG1(d38:1)+H	CerG1	(d18:1/20:0)	(d18:1)	(20:0)			756.635	C44 H86 O8 N1	6412.95	73895.3	1531.61	12913.3	1.089e+06	2.34262e+06	2.35872e+06	2795.97	507.618	1.49207e+06	1.0794e+06	1.87654e+06	4.6346e+06	4.99154e+06	4427.3	1.05966e+06	2.89786e+06	1.90713e+07	12338.8	1.46355e+06	9.43485e+06	1.29384e+06	1.46525e+06	1.4774e+06	3.54559e+06	3.37879e+06	4.45686e+06	107258	3.62325e+06	1.90014e+06	1.8067e+06	485431	3.05216e+06	1.41868e+07	776.891	3.72765e+06	756.635	756.635	756.635
0	CerG1(d18:1/20:0+O)+H	CerG1(d38:1+O)+H	CerG1	(d18:1/20:0+O)	(d18:1)	(20:0+O)			772.63	C44 H86 O9 N1	3.14773e+07	1.88522e+07	2.94439e+06	1.0664e+07	6.04494e+06	1.39744e+07	1.40416e+07	2.9922e+06	5.31161e+06	1.03711e+07	6.91779e+06	1.38579e+07	3.66781e+07	3.49175e+07	1.37537e+07	7.11291e+06	1.90822e+07	1.59107e+08	1.0045e+07	9.52317e+06	8.48695e+07	9.44589e+06	6.50694e+06	9.46739e+06	2.42044e+07	2.58948e+07	2.56547e+07	2.44845e+06	2.08115e+07	1.18957e+07	1.05063e+07	6.04808e+06	2.37482e+07	1.15384e+08	2.59343e+06	2.55963e+07	772.63	772.629	772.63
1	CerG1(d38:1+pO)-H	CerG1(d38:1+pO)-H	CerG1	(d38:1+pO)	(d38:1+pO)				770.615	C44 H84 O9 N1	4884.07	638955	0	432533	0	175502	222424	0	127836	81329.3	3097.28	417116	981600	1.36852e+06	537187	109797	376095	3.91009e+06	74724.7	246134	1.80106e+06	127450	40480.6	513340	824660	714079	1.33157e+06	0	753337	508509	289700	0	890311	2.36421e+06	0	498691	770.615	770.615
0	CerG1(d39:0+pO+O)+H-H2O	CerG1(d39:0+pO+O)+H-H2O	CerG1	(d39:0+pO+O)	(d39:0+pO+O)				786.645	C45 H88 O9 N1	4.70219e+07	1.62913e+07	15049.3	1.37437e+07	3.58346e+06	9.3224e+06	1.03785e+07	914546	2.6777e+06	2.10618e+07	2.98058e+06	1.14768e+07	3.75301e+07	3.37149e+07	1.6648e+07	6.67836e+06	2.27867e+07	6.66373e+07	6.78582e+06	348538	7.31229e+07	2.41608e+06	4.6386e+06	5.39083e+06	1.95621e+07	2.84329e+07	2.4733e+07	1.86383e+06	2.27276e+07	1.13418e+07	9.57337e+06	4.43575e+06	2.53405e+07	9.45907e+07	649101	2.82487e+07	786.645	786.645	786.645
0	CerG1(d18:1/21:0+O)+H	CerG1(d39:1+O)+H	CerG1	(d18:1/21:0+O)	(d18:1)	(21:0+O)			786.645	C45 H88 O9 N1	4.69079e+07	1.65684e+07	2.94284e+06	1.34873e+07	3.61337e+06	9.61506e+06	1.16489e+07	977932	1.64644e+06	1.47743e+07	3.04649e+06	1.21989e+07	3.60611e+07	3.18166e+07	1.69948e+07	5.50751e+06	2.21859e+07	1.18541e+08	6.62266e+06	8.07941e+06	7.83652e+07	2.50586e+06	4.40059e+06	7.45549e+06	2.18123e+07	2.91568e+07	2.26176e+07	1.82157e+06	2.33118e+07	1.13383e+07	9.535e+06	4.27474e+06	2.83537e+07	9.45907e+07	676456	2.82487e+07	786.644	786.644	786.646
1	CerG1(d39:1+pO)-H	CerG1(d39:1+pO)-H	CerG1	(d39:1+pO)	(d39:1+pO)				784.631	C45 H86 O9 N1	1.14681e+06	399745	0	466873	0	0	308800	0	0	2613.49	956.482	1674.45	1.05268e+06	954.693	146525	0	422089	15906.2	167290	0	2.68224e+06	0	53721.3	1204.32	422272	129781	153022	0	917633	263097	63346.2	0	151588	2.10648e+06	0	143933	784.633	784.631
0	CerG1(d18:0/22:0)+H	CerG1(d40:0)+H	CerG1	(d18:0/22:0)	(d18:0)	(22:0)			786.682	C46 H92 O8 N1	2.72979e+06	1.55802e+06	0	850975	551866	1.21743e+06	858701	233415	483602	799720	424348	1.09796e+06	2.97845e+06	2.57324e+06	1032769	439821	1.71839e+06	6.61706e+06	603567	390967	6.72837e+06	22221.8	362656	1.00723e+06	1.78522e+06	2.09073e+06	2.90625e+06	113341	1.49366e+06	546639	1.00844e+06	104343	2.07672e+06	9.17596e+06	94558.8	2.67399e+06	786.682	786.682
0	CerG1(d18:0/22:0+O)+H	CerG1(d40:0+O)+H	CerG1	(d18:0/22:0+O)	(d18:0)	(22:0+O)			802.677	C46 H92 O9 N1	2.50514e+07	1.41672e+07	1.9544e+06	8.25294e+06	4.7475e+06	1.15171e+07	8.81758e+06	2.88506e+06	3.05537e+06	8.02917e+06	5.15317e+06	1.05716e+07	2.54127e+07	2.97501e+07	1.19122e+07	7.96227e+06	1.38956e+07	1.04624e+08	7.1288e+06	7.55738e+06	5.64525e+07	1.02663e+07	6.18478e+06	8.55715e+06	1.4263e+07	1.80942e+07	1.91668e+07	2.33884e+06	1.45878e+07	9.31539e+06	7.68568e+06	4.29947e+06	1.85939e+07	7.55945e+07	1.6224e+06	1.89742e+07	802.676	802.676	802.676
1	CerG1(d18:0+pO/22:0)+H-H2O	CerG1(d40:0+pO)+H-H2O	CerG1	(d18:0+pO/22:0)	(d18:0+pO)	(22:0)			784.666	C46 H90 O8 N1	2.1798e+07	1.21348e+07	3.13644e+06	9.78521e+06	5.77775e+06	1.18878e+07	1.03993e+07	2.96226e+06	3.1073e+06	6.83688e+06	5.79373e+06	1.15353e+07	2.83493e+07	2.60515e+07	1.09023e+07	5.66954e+06	1.57555e+07	8.72222e+07	7.93162e+06	6.35335e+06	5.49596e+07	8.83195e+06	6.31402e+06	8.22943e+06	1.86338e+07	2.41716e+07	2.49756e+07	2.80434e+06	1.88466e+07	1.10146e+07	1.03977e+07	5.13646e+06	1.98277e+07	7.25838e+07	2.89344e+06	2.06578e+07	784.667	784.666	784.666
0	CerG1(d18:1/22:0)+H	CerG1(d40:1)+H	CerG1	(d18:1/22:0)	(d18:1)	(22:0)			784.666	C46 H90 O8 N1	2.18014e+07	1.21347e+07	2.89585e+06	9.77142e+06	5.78936e+06	1.19568e+07	1.04707e+07	2.98627e+06	3.07483e+06	6.83681e+06	5.794e+06	1.15037e+07	2.82584e+07	2.60478e+07	1.08569e+07	6.03575e+06	1.57515e+07	8.29724e+07	7.89996e+06	7.11926e+06	5.41934e+07	8.83178e+06	6.16781e+06	8.3048e+06	1.86272e+07	2.41716e+07	2.49953e+07	2.6393e+06	1.88496e+07	1.10256e+07	1.03555e+07	5.13869e+06	1.98239e+07	7.19656e+07	2.86456e+06	2.07036e+07	784.666	784.666	784.667
0	CerG1(d18:1/22:0+O)+H	CerG1(d40:1+O)+H	CerG1	(d18:1/22:0+O)	(d18:1)	(22:0+O)			800.661	C46 H90 O9 N1	2.75301e+08	1.43205e+08	3.08114e+07	8.99889e+07	5.28847e+07	1.0753e+08	9.49008e+07	2.93569e+07	4.06185e+07	7.41505e+07	5.85328e+07	1.09764e+08	3.17125e+08	3.06854e+08	1.2181e+08	5.95727e+07	1.56761e+08	1.24245e+09	7.47627e+07	7.13223e+07	8.08048e+08	7.86956e+07	5.98147e+07	7.66819e+07	1.95815e+08	2.15681e+08	2.63935e+08	2.50914e+07	1.75127e+08	1.04133e+08	9.19708e+07	5.71178e+07	2.10077e+08	1.02852e+09	2.56493e+07	2.34273e+08	800.661	800.661	800.662
1	CerG1(d18:0+pO/22:1)+H-H2O	CerG1(d40:1+pO)+H-H2O	CerG1	(d18:0+pO/22:1)	(d18:0+pO)	(22:1)			782.65	C46 H88 O8 N1	1.21836e+07	5.20178e+06	418219	3.05195e+06	2.46851e+06	4.20226e+06	4.26619e+06	2.23851e+06	1.43725e+06	2.95963e+06	602034	4.88619e+06	1.443e+07	1.53794e+07	4.86956e+06	2.5195e+06	6.8421e+06	5.85081e+07	2.57349e+06	2.47609e+06	3.55988e+07	2.88173e+06	177660	3.70597e+06	8.87633e+06	6.28086e+06	1.12315e+07	700648	9.20342e+06	5.87773e+06	3.30597e+06	133247	8.64244e+06	4.0784e+07	548251	1.14543e+07	782.65	782.651	782.65
1	CerG1(d40:1+pO)-H	CerG1(d40:1+pO)-H	CerG1	(d18:0+pO/22:1)	(d18:0+pO)	(22:1)			798.646	C46 H88 O9 N1	1.22091e+07	5.9362e+06	1.21029e+06	4.53675e+06	1.94838e+06	4.5981e+06	6.01874e+06	850979	1.46246e+06	4.22486e+06	2.30476e+06	3.4053e+06	1.23224e+07	1.11913e+07	5.28823e+06	3.11568e+06	6.69537e+06	3.08334e+07	3.46704e+06	3.0147e+06	2.53266e+07	3.5959e+06	2.29528e+06	3.17237e+06	8.51813e+06	8.97456e+06	9.89373e+06	912657	7.8038e+06	4.22116e+06	4.45141e+06	2.12033e+06	8.33446e+06	2.61349e+07	1.03248e+06	9.09412e+06	798.642	798.643	798.646
0	CerG1(d18:1/22:1)+H	CerG1(d40:2)+H	CerG1	(d18:1/22:1)	(d18:1)	(22:1)			782.65	C46 H88 O8 N1	1.02331e+07	4.69507e+06	1.16434e+06	3.40484e+06	1.39781e+06	4.54819e+06	4.70566e+06	1.51091e+06	1.70549e+06	4.08156e+06	2.30834e+06	4.86889e+06	1.29637e+07	1.48236e+07	5.44395e+06	2.54874e+06	7.4761e+06	7.91276e+07	3.34957e+06	3.07779e+06	3.53712e+07	3.87518e+06	2.52834e+06	3.40053e+06	7.76298e+06	8.98014e+06	1.0197e+07	691454	7.69461e+06	4.61924e+06	3.41225e+06	1.28749e+06	7.86331e+06	4.76804e+07	763044	6.64242e+06	782.651	782.651	782.65
1	CerG1(d18:2/22:0+O)+H	CerG1(d40:2+O)+H	CerG1	(d18:2/22:0+O)	(d18:2)	(22:0+O)			798.645	C46 H88 O9 N1	7.18721e+06	4.32662e+06	1.56034e+06	4.82452e+06	2.19893e+06	4.52278e+06	5.49033e+06	1.64791e+06	1.28958e+06	2.47926e+06	2.61454e+06	4.55804e+06	1.25643e+07	1.32499e+07	5.31215e+06	2.16756e+06	5.17309e+06	6.52098e+07	3.48805e+06	2.96658e+06	3.42258e+07	2.97188e+06	2.56366e+06	3.16723e+06	1.03094e+07	9.851e+06	9.37154e+06	282717	8.24247e+06	5.3376e+06	2.74875e+06	2.11105e+06	9.58801e+06	4.87428e+07	1.00984e+06	7.96958e+06	798.645	798.645	798.645
0	CerG1(d18:0+pO/22:2)+H	CerG1(d40:2+pO)+H	CerG1	(d18:0+pO/22:2)	(d18:0+pO)	(22:2)			798.645	C46 H88 O9 N1	2.31737e+07	9.84186e+06	1.16108e+06	4.87939e+06	3.11597e+06	5.84227e+06	8.79769e+06	1.67951e+06	4.12285e+06	7.52343e+06	4.37131e+06	7.92727e+06	2.38006e+07	1.59436e+07	7.70775e+06	3.48115e+06	1.2004e+07	6.07389e+07	6.08484e+06	6.65566e+06	4.78801e+07	6.9245e+06	4.06075e+06	3.83691e+06	1.38987e+07	1.3027e+07	1.56649e+07	1.08068e+06	1.09107e+07	6.62595e+06	4.61966e+06	2.43814e+06	1.27084e+07	4.70681e+07	1.14082e+06	1.24593e+07	798.645	798.645	798.645
0	CerG1(d18:0/23:0)+H	CerG1(d41:0)+H	CerG1	(d18:0/23:0)	(d18:0)	(23:0)			800.697	C47 H94 O8 N1	204087	267685	0	65870.6	0	0	5503.66	0	0	0	0	0	499206	178031	0	0	378044	3.3598e+06	121252	0	2.13958e+06	278432	155956	0	587495	517897	383470	0	240551	145666	0	0	173139	3.52026e+06	4207.58	444146	800.697	800.697
0	CerG1(d18:0/23:0+O)+H	CerG1(d41:0+O)+H	CerG1	(d18:0/23:0+O)	(d18:0)	(23:0+O)			816.692	C47 H94 O9 N1	8.60855e+06	8.27918e+06	844600	1.74779e+06	2.41633e+06	3.72768e+06	3.66195e+06	725883	496526	4.06829e+06	881373	4.2663e+06	1.16878e+07	1.33377e+07	4.47134e+06	2.08522e+06	6.39665e+06	4.27071e+07	2.75068e+06	1.69372e+06	2.4881e+07	2.17988e+06	1.01805e+06	3.22079e+06	8.92504e+06	7.0749e+06	8.37297e+06	513006	5.97998e+06	1.54458e+06	3.03488e+06	9446.44	3.00176e+06	3.96163e+07	164012	4.25651e+06	816.693	816.693	816.692
1	CerG1(d18:0+pO/23:0)+H-H2O	CerG1(d41:0+pO)+H-H2O	CerG1	(d18:0+pO/23:0)	(d18:0+pO)	(23:0)			798.682	C47 H92 O8 N1	1.57489e+07	8.79157e+06	2.28495e+06	7.23044e+06	4.12247e+06	8.60841e+06	8.15783e+06	2.09777e+06	2.0981e+06	4.63861e+06	4.45316e+06	7.41967e+06	2.15124e+07	1.7877e+07	9.53485e+06	4.32111e+06	1.17882e+07	5.84048e+07	5.46077e+06	6.1631e+06	4.20778e+07	5.12165e+06	3.60001e+06	6.62616e+06	1.48024e+07	1.47895e+07	1.81112e+07	1.26847e+06	1.40465e+07	7.45991e+06	7.10094e+06	4.51208e+06	1.43496e+07	6.02709e+07	2.51587e+06	1.89022e+07	798.682	798.682	798.682
0	CerG1(d18:1/23:0)+H	CerG1(d41:1)+H	CerG1	(d18:1/23:0)	(d18:1)	(23:0)			798.682	C47 H92 O8 N1	1.5908e+07	8.78384e+06	2.57202e+06	7.23941e+06	4.13885e+06	8.37205e+06	8.17866e+06	2.0948e+06	2.31547e+06	4.69906e+06	4.41301e+06	7.43332e+06	2.20839e+07	1.80657e+07	9.52168e+06	4.37904e+06	1.14343e+07	6.37442e+07	5.47917e+06	5.8821e+06	4.16983e+07	5.09577e+06	3.92833e+06	6.2114e+06	1.45593e+07	1.51576e+07	1.70324e+07	1.26668e+06	1.52193e+07	7.48768e+06	7.27259e+06	4.84726e+06	1.40417e+07	6.06556e+07	2.51482e+06	1.91863e+07	798.682	798.683	798.682
0	CerG1(d18:1/23:0+O)+H	CerG1(d41:1+O)+H	CerG1	(d18:1/23:0+O)	(d18:1)	(23:0+O)			814.677	C47 H92 O9 N1	1.43165e+08	7.0599e+07	1.73906e+07	4.46553e+07	2.77261e+07	5.48667e+07	4.83274e+07	1.20349e+07	2.29192e+07	3.97146e+07	2.80223e+07	4.74757e+07	1.41427e+08	1.34263e+08	6.20732e+07	2.93625e+07	7.26742e+07	5.90816e+08	4.01186e+07	3.74667e+07	3.22491e+08	3.25641e+07	2.89314e+07	3.30385e+07	9.11826e+07	9.5345e+07	1.23985e+08	1.17163e+07	9.14803e+07	4.82773e+07	5.07776e+07	3.00759e+07	1.03739e+08	5.09839e+08	1.31406e+07	1.08781e+08	814.676	814.677	814.676
0	CerG1(d18:0+pO/23:1)+H-H2O	CerG1(d41:1+pO)+H-H2O	CerG1	(d18:0+pO/23:1)	(d18:0+pO)	(23:1)			796.666	C47 H90 O8 N1	1.537e+07	9.54102e+06	211647	5.11355e+06	249569	3.85628e+06	4.1048e+06	0	638283	4.15144e+06	534535	3.83605e+06	1.80207e+07	1.90497e+07	7.08972e+06	2.08521e+06	256683	5.89388e+07	9241.7	1.86332e+06	3.79883e+07	3.4126e+06	389780	2.9904e+06	1.01633e+07	1.35992e+07	1.26902e+07	0	1.09553e+07	6.13149e+06	6.01393e+06	795220	1.14335e+07	3.85043e+07	0	9.66101e+06	796.666	796.666	796.666
1	CerG1(d18:0+pO/23:1)+H-H2O	CerG1(d41:1+pO)+H-H2O	CerG1	(d18:0+pO/23:1)	(d18:0+pO)	(23:1)			796.666	C47 H90 O8 N1	6.07843e+06	3.59691e+06	530636	2.53559e+06	1.41076e+06	1.93803e+06	2.03439e+06	554809	1.09487e+06	1.63232e+06	969971	2.3061e+06	5.43968e+06	4.92912e+06	1.84108e+06	813166	2.31328e+06	2.47696e+07	1.00692e+06	388044	1.33345e+07	645906	625420	1.54272e+06	4.1113e+06	3.96272e+06	6.32589e+06	530467	4.26251e+06	2.28633e+06	1.66665e+06	1.17961e+06	5.17341e+06	2.31067e+07	109920	4.62353e+06	796.666	796.666	796.666
1	CerG1(d41:1+pO)-H	CerG1(d41:1+pO)-H	CerG1	(d18:0+pO/23:1)	(d18:0+pO)	(23:1)			812.662	C47 H90 O9 N1	6.96898e+06	3.29079e+06	153967	2.122e+06	1.25939e+06	2.14105e+06	1.84035e+06	379405	581391	1.56207e+06	1.90991e+06	1.61495e+06	4.41676e+06	5.12582e+06	2.39427e+06	1.19384e+06	3.68533e+06	1.55455e+07	1.72089e+06	1.60173e+06	1.20538e+07	1.81051e+06	1.56735e+06	1.34109e+06	3.70294e+06	3.31883e+06	4.78007e+06	411624	2.75588e+06	2.44086e+06	2.02116e+06	919882	5.23054e+06	1.40672e+07	569179	2.76332e+06	812.656	812.662	812.662
0	CerG1(d18:1/23:1)+H	CerG1(d41:2)+H	CerG1	(d18:1/23:1)	(d18:1)	(23:1)			796.666	C47 H90 O8 N1	1.54276e+07	9.39537e+06	1873.42	5.05028e+06	226880	3.972e+06	3.92809e+06	0	643051	44162.8	932952	3.85448e+06	1.79654e+07	1.72659e+07	7.08701e+06	10009.7	9.42333e+06	5.96281e+07	4.31917e+06	1817.49	3.79083e+07	13345.1	389780	2.9904e+06	9.98738e+06	1.35584e+07	1.24528e+07	0	1.00669e+07	6.13149e+06	6.01393e+06	785941	1.14335e+07	3.85043e+07	0	9.37626e+06	796.665	796.666	796.666
1	CerG1(d18:2/23:0+O)+H	CerG1(d41:2+O)+H	CerG1	(d18:2/23:0+O)	(d18:2)	(23:0+O)			812.661	C47 H90 O9 N1	1.48733e+07	4.98582e+06	3.73501e+06	8.61813e+06	1.08416e+06	4.55626e+06	8.72643e+06	0	1.33144e+06	2.48501e+06	4.03899e+06	11594.7	2.69354e+07	1.71705e+07	9.16383e+06	2625.18	1.54811e+07	6.03485e+07	3.75076e+06	3.152e+06	5.27454e+07	18067.9	1.69847e+06	1.15238e+06	1.3771e+07	1.71216e+07	2.15278e+07	0	2.02737e+07	7.03493e+06	4.97827e+06	1.23273e+06	1.60595e+07	5.97678e+07	1.42448e+06	1.69315e+07	812.662	812.661	812.661
0	CerG1(d18:0+pO/23:2)+H	CerG1(d41:2+pO)+H	CerG1	(d18:0+pO/23:2)	(d18:0+pO)	(23:2)			812.661	C47 H90 O9 N1	9.47825e+06	4.22425e+06	519908	2.24629e+06	1.34385e+06	2.32622e+06	3.32386e+06	184848	1.67838e+06	4.12025e+06	1.51618e+06	2.0817e+06	8.7523e+06	2.17822e+06	3.27797e+06	5463.88	4.31542e+06	499992	2.14779e+06	23190.8	1.60683e+07	794658	1.57764e+06	2.66486e+06	4.84295e+06	5.10368e+06	5.54893e+06	368238	3.81016e+06	2.15553e+06	1.87896e+06	1.06011e+06	5.13039e+06	1.62832e+07	65228.6	4.02876e+06	812.661	812.661	812.661
0	CerG1(d41:6+pO)-H	CerG1(d41:6+pO)-H	CerG1	(d41:6+pO)	(d41:6+pO)				802.584	C47 H80 O9 N1	556418	61340	76072.8	189090	57304.4	173752	228996	0	271529	331146	81830.1	99997.5	1.20275e+06	126041	397865	0	467444	617147	204564	0	1.02699e+06	0	155862	0	276992	104893	306170	0	862680	597.404	140122	59208.9	275503	627583	0	322654	802.584		802.584
0	CerG1(d18:0/24:0)+H	CerG1(d42:0)+H	CerG1	(d18:0/24:0)	(d18:0)	(24:0)			814.713	C48 H96 O8 N1	3.03053e+06	2.01132e+06	0	1.14687e+06	486240	1.54939e+06	1.32969e+06	446549	230775	657584	698571	1.40098e+06	3.0855e+06	3.42585e+06	1.65994e+06	1.09937e+06	1.70413e+06	9.81823e+06	456060	895734	7.63553e+06	1.14805e+06	994104	1.18088e+06	1.7789e+06	1.97418e+06	2.32168e+06	165769	1.88212e+06	1.20078e+06	429385	0	2.09119e+06	8.93666e+06	4147.97	2.31998e+06	814.713	814.712
0	CerG1(d18:0/24:0+O)+H	CerG1(d42:0+O)+H	CerG1	(d18:0/24:0+O)	(d18:0)	(24:0+O)			830.708	C48 H96 O9 N1	8.3015e+06	6.13397e+06	605631	2.79316e+06	1.92203e+06	4.14077e+06	2.94565e+06	809942	1.53892e+06	2.82133e+06	1.71386e+06	2.43615e+06	8.80415e+06	9.59795e+06	4.50519e+06	2.82493e+06	4.48304e+06	3.00708e+07	2.23079e+06	2.59551e+06	2.01336e+07	3.59207e+06	2.0163e+06	3.50695e+06	5.07528e+06	6.53042e+06	6.49659e+06	880517	5.14267e+06	3.64666e+06	3.10458e+06	1.51947e+06	6.13009e+06	2.52925e+07	701918	8.66155e+06	830.708	830.707	830.708
0	CerG1(d42:0+pO)+H-H2O	CerG1(d42:0+pO)+H-H2O	CerG1	(d42:0+pO)	(d42:0+pO)				812.697	C48 H94 O8 N1	6.16225e+06	2.73316e+06	616288	1.68569e+06	1.15968e+06	2.09907e+06	2.06541e+06	96839.4	691759	2.17955e+06	1.5157e+06	2.94111e+06	5.9235e+06	5.62179e+06	2.81475e+06	1.21672e+06	4.03452e+06	2.47384e+07	2.42494e+06	1.42965e+06	1.12351e+07	2.53119e+06	948512	1.70054e+06	4.77923e+06	4.64196e+06	7.18821e+06	510206	5.50131e+06	2.85926e+06	2.41857e+06	1.2076e+06	4.04018e+06	1.92943e+07	664910	4.92862e+06	812.697	812.697	812.697
1	CerG1(d18:0+pO/24:0)+H-H2O	CerG1(d42:0+pO)+H-H2O	CerG1	(d18:0+pO/24:0)	(d18:0+pO)	(24:0)			812.697	C48 H94 O8 N1	3.72668e+07	2.33571e+07	6.19357e+06	1.89566e+07	1.14446e+07	2.33273e+07	2.06799e+07	6.44919e+06	6.82031e+06	1.40661e+07	1.16973e+07	2.19493e+07	5.7121e+07	5.43374e+07	2.42308e+07	1.35533e+07	2.91345e+07	1.83533e+08	1.75792e+07	1.78746e+07	1.27297e+08	1.88399e+07	1.39203e+07	1.81983e+07	3.79578e+07	4.50171e+07	5.03487e+07	5.84681e+06	3.47752e+07	2.21434e+07	2.03832e+07	1.27457e+07	3.64358e+07	1.69645e+08	5.77999e+06	4.69347e+07	812.697	812.697	812.698
0	CerG1(d18:0+pO/24:0+O)+H-H2O	CerG1(d42:0+pO+O)+H-H2O	CerG1	(d18:0+pO/24:0+O)	(d18:0+pO)	(24:0+O)			828.692	C48 H94 O9 N1	2.33484e+08	1.18684e+08	2.6801e+07	8.3604e+07	5.13256e+07	9.25403e+07	8.81696e+07	2.50978e+07	4.00302e+07	7.71156e+07	5.43958e+07	1.02315e+08	2.76676e+08	2.80649e+08	1.20212e+08	5.43003e+07	1.39665e+08	1.06685e+09	7.74895e+07	6.8731e+07	6.83693e+08	6.96168e+07	5.90191e+07	6.97687e+07	1.64482e+08	1.829e+08	2.27576e+08	2.16649e+07	1.53842e+08	9.95847e+07	9.23188e+07	5.59829e+07	1.8696e+08	9.89648e+08	2.42386e+07	2.20185e+08	828.692	828.691	828.692
0	CerG1(d18:1/24:0)+H	CerG1(d42:1)+H	CerG1	(d18:1/24:0)	(d18:1)	(24:0)			812.697	C48 H94 O8 N1	5.92538e+06	1.34721e+06	85605.2	802121	345965	2.05087e+06	1.23186e+06	134805	394637	1.09028e+06	657058	1.96022e+06	4.02612e+06	5.08149e+06	2.11874e+06	1.17028e+06	2.58106e+06	1.44007e+07	1.14236e+06	879201	9.5275e+06	984824	889607	1.44465e+06	2.81575e+06	3.13258e+06	2.39594e+06	159399	2.22789e+06	1.62274e+06	1.08566e+06	513384	2.19724e+06	1.09316e+07	650717	2.62288e+06	812.698	812.697	812.697
0	CerG1(d18:1/24:0)+H	CerG1(d42:1)+H	CerG1	(d18:1/24:0)	(d18:1)	(24:0)			812.697	C48 H94 O8 N1	3.91587e+07	2.34302e+07	6.27588e+06	1.8957e+07	1.15433e+07	2.36905e+07	2.05908e+07	6.17333e+06	7.20172e+06	1.42412e+07	1.13368e+07	2.19584e+07	5.5841e+07	5.88204e+07	2.4032e+07	1.35768e+07	2.85386e+07	1.8378e+08	1.74252e+07	1.74393e+07	1.28014e+08	1.82435e+07	1.39756e+07	1.82553e+07	3.89866e+07	4.48907e+07	4.83633e+07	5.90894e+06	3.84247e+07	2.25473e+07	2.05064e+07	1.29497e+07	3.71565e+07	1.59804e+08	5.3049e+06	4.74582e+07	812.697	812.697	812.697
0	CerG1(d18:1/24:0)+H-H2O	CerG1(d42:1)+H-H2O	CerG1	(d18:1/24:0)	(d18:1)	(24:0)			794.687	C48 H92 O7 N1	1.44082e+06	648815	139386	188789	255608	909917	540279	0	109344	472156	620547	761465	2.23173e+06	2.11624e+06	996757	256487	793627	8.11334e+06	0	270539	4.68134e+06	169449	7659.04	377694	1.19958e+06	1.54107e+06	979097	130294	1.10265e+06	634107	338308	259924	1.83022e+06	4.27356e+06	0	2.28146e+06	794.687	794.687	794.687
0	CerG1(d42:1)-H	CerG1(d42:1)-H	CerG1	(d18:1/24:0)	(d18:1)	(24:0)			810.683	C48 H92 O8 N1	793396	0	101750	4439.96	0	395061	212520	83407	80959.5	86643.5	218161	2489.74	805704	494001	132178	0	468073	2.00452e+06	354899	0	1.82074e+06	881.147	740.656	199900	500981	431905	308075	0	479662	0	177483	86508	495968	1.85129e+06	0	354761	810.683		810.683
0	CerG1(d18:1/24:0+O)+H	CerG1(d42:1+O)+H	CerG1	(d18:1/24:0+O)	(d18:1)	(24:0+O)			828.692	C48 H94 O9 N1	2.33039e+08	1.18745e+08	2.66016e+07	8.3416e+07	5.12489e+07	8.9941e+07	8.81521e+07	2.55808e+07	4.00131e+07	7.69238e+07	5.43146e+07	365626	2.75544e+08	1.20921e+06	1.18486e+08	5.42929e+07	1.39911e+08	1.0639e+09	7.74624e+07	6.82106e+07	6.73173e+08	6.95622e+07	5.89773e+07	6.95278e+07	1.64256e+08	1.8223e+08	2.2752e+08	2.29285e+07	1.52734e+08	9.78777e+07	9.06299e+07	5.59477e+07	1.83985e+08	9.95706e+08	2.38121e+07	2.29328e+08	828.693	828.692	828.692
1	CerG1(d18:1+hO/24:0)+H-H2O	CerG1(d42:1+hO)+H-H2O	CerG1	(d18:1+hO/24:0)	(d18:1+hO)	(24:0)			810.682	C48 H92 O8 N1	1.90546e+08	8.65373e+07	2.46626e+07	7.29425e+07	3.82809e+07	8.58576e+07	8.8799e+07	2.57065e+07	2.77595e+07	6.29429e+07	4.95061e+07	1.0608e+08	2.79301e+08	2.97192e+08	1.03515e+08	4.7494e+07	1.39155e+08	1.1658e+09	5.87389e+07	5.46796e+07	7.38968e+08	6.90994e+07	4.28006e+07	6.48357e+07	1.64641e+08	1.93773e+08	2.19179e+08	1.92449e+07	1.49692e+08	8.16874e+07	6.19967e+07	3.41692e+07	1.63898e+08	9.0572e+08	1.60708e+07	1.59992e+08	810.682	810.682	810.682
0	CerG1(d18:1+hO/24:0+O)+H-H2O	CerG1(d42:1+hO+O)+H-H2O	CerG1	(d18:1+hO/24:0+O)	(d18:1+hO)	(24:0+O)			826.677	C48 H92 O9 N1	6.47939e+06	2.13762e+06	963432	3.45125e+06	1.30115e+06	2.62451e+06	4.20843e+06	97406	692481	2.7959e+06	2.46026e+06	4.80726e+06	1.05994e+07	1.23214e+07	4.24858e+06	1.50402e+06	5.79267e+06	4.17753e+07	2.24732e+06	2.15703e+06	2.80638e+07	2.20658e+06	1.41237e+06	4.24944e+06	8.14637e+06	7.3438e+06	9.29573e+06	566439	7.32468e+06	3.91633e+06	3.11888e+06	1.20702e+06	6.24773e+06	3.37345e+07	310427	6.63313e+06	826.677	826.677	826.677
0	CerG1(d18:0+pO/24:1)+H-H2O	CerG1(d42:1+pO)+H-H2O	CerG1	(d18:0+pO/24:1)	(d18:0+pO)	(24:1)			810.682	C48 H92 O8 N1	1.90532e+08	8.65384e+07	2.46601e+07	7.29403e+07	3.82738e+07	8.58563e+07	8.88019e+07	2.48847e+07	2.77502e+07	6.29357e+07	4.95016e+07	1.06078e+08	2.79298e+08	2.95883e+08	1.03512e+08	4.6801e+07	1.39152e+08	1.2307e+09	5.87348e+07	5.45689e+07	6.964e+08	6.7127e+07	4.27991e+07	6.4833e+07	1.50237e+08	1.93762e+08	2.19175e+08	1.92481e+07	1.49691e+08	8.16839e+07	6.20009e+07	3.41641e+07	1.63896e+08	9.0572e+08	1.60698e+07	1.59992e+08	810.682	810.682	810.682
1	CerG1(d18:0+pO/24:1)+H-H2O	CerG1(d42:1+pO)+H-H2O	CerG1	(d18:0+pO/24:1)	(d18:0+pO)	(24:1)			810.682	C48 H92 O8 N1	8.58633e+06	6.81442e+06	1.20954e+06	3.49428e+06	3.25978e+06	3.97556e+06	3.13437e+06	782469	1.34998e+06	3.33522e+06	2.97745e+06	2.85243e+06	1.2348e+07	1.06815e+07	4.94169e+06	2.45424e+06	5.17958e+06	4.88573e+07	2.59101e+06	2.60327e+06	3.04011e+07	3.22163e+06	2.42615e+06	3.55561e+06	7.45486e+06	7.75234e+06	9.63748e+06	795119	6.37758e+06	3.07734e+06	3.60045e+06	2.31058e+06	8.63893e+06	4.89716e+07	115818	9.55775e+06	810.682	810.682	810.682
1	CerG1(d42:1+pO)-H	CerG1(d42:1+pO)-H	CerG1	(d18:0+pO/24:1)	(d18:0+pO)	(24:1)			826.678	C48 H92 O9 N1	8.63651e+06	5.09252e+06	1.06123e+06	4.40888e+06	2.85776e+06	3.87918e+06	3.54572e+06	878711	1.19705e+06	2.02863e+06	2.42112e+06	3.41509e+06	1.11703e+07	9.96857e+06	4.4929e+06	2.00848e+06	5.22979e+06	3.43166e+07	3.0317e+06	3.03456e+06	2.32537e+07	2.91785e+06	2.06925e+06	3.58176e+06	7.2893e+06	5.65395e+06	9.62981e+06	624555	6.25025e+06	3.33295e+06	3.35417e+06	2.04143e+06	8.34622e+06	2.31143e+07	1.01774e+06	7.85217e+06	826.673	826.673	826.674
0	CerG1(d18:1/24:1)+H	CerG1(d42:2)+H	CerG1	(d18:1/24:1)	(d18:1)	(24:1)			810.682	C48 H92 O8 N1	1.10389e+07	7.12107e+06	1.48074e+06	4.67597e+06	2.90462e+06	5.5894e+06	6.10529e+06	1.84883e+06	2.09574e+06	5.05995e+06	3.43308e+06	5.10746e+06	1.2621e+07	1.40998e+07	6.03306e+06	666334	9.4249e+06	4.88287e+07	3.7211e+06	3.57046e+06	2.78808e+07	5.84707e+06	2.7901e+06	3.73012e+06	9.39057e+06	1.07246e+07	1.2372e+07	1.35905e+06	9.6358e+06	5.98411e+06	3.22018e+06	2.48014e+06	1.0442e+07	3.73175e+07	669895	9.2357e+06	810.682	810.681	810.682
0	CerG1(d18:1/24:1)+H	CerG1(d42:2)+H	CerG1	(d18:1/24:1)	(d18:1)	(24:1)			810.682	C48 H92 O8 N1	1.81291e+08	8.01784e+07	2.3416e+07	6.86633e+07	3.54806e+07	8.10884e+07	8.4339e+07	2.49412e+07	2.65092e+07	5.94877e+07	4.5958e+07	9.80054e+07	2.63835e+08	2.89505e+08	9.68323e+07	4.65761e+07	1.31891e+08	1.14773e+09	5.54348e+07	5.52465e+07	6.9557e+08	6.79247e+07	4.04353e+07	6.10505e+07	1.55289e+08	1.81378e+08	2.06292e+08	1.82515e+07	1.41449e+08	7.78574e+07	5.84663e+07	3.20389e+07	1.53608e+08	8.47387e+08	1.59434e+07	1.48356e+08	810.682	810.682	810.682
0	CerG1(d18:1/24:1)+H-H2O	CerG1(d42:2)+H-H2O	CerG1	(d18:1/24:1)	(d18:1)	(24:1)			792.671	C48 H90 O7 N1	6.38311e+06	1.39538e+06	844776	2.17746e+06	3814.18	3.50113e+06	3.22321e+06	873138	817715	1.72418e+06	824332	3.12279e+06	1.00577e+07	9.76646e+06	3.69572e+06	1.33944e+06	2.84169e+06	4.37898e+07	1.55017e+06	1.5827e+06	2.43466e+07	3.66722e+06	1.06994e+06	2.53961e+06	5.06277e+06	6.923e+06	7.83603e+06	127685	4.18411e+06	2.6232e+06	2.31966e+06	832778	5.65955e+06	2.98447e+07	445375	4.44345e+06	792.671	792.671	792.671
0	CerG1(d42:2)-H	CerG1(d42:2)-H	CerG1	(d18:1/24:1)	(d18:1)	(24:1)			808.667	C48 H90 O8 N1	2.90086e+06	137737	116511	679407	1250.6	721241	675451	0	1771.62	2417.28	120898	525571	6228.31	868500	86734.5	634985	1.35029e+06	9.12372e+06	1.41888e+06	7746.78	978339	675398	525377	1.18218e+06	1.31191e+06	1.68672e+06	1.47666e+06	0	1.23064e+06	701822	1.15283e+06	144863	1.26908e+06	4.51501e+06	2574.24	983794	808.667	808.667	808.667
0	CerG1(d18:1/24:1)+H	CerG1(d42:2)+H	CerG1	(d18:1/24:1)	(d18:1)	(24:1)			810.682	C48 H92 O8 N1	5917.34	5.66756e+06	1.09866e+06	18103.8	2.30139e+06	3.81999e+06	3.12973e+06	818256	1.35045e+06	6619.14	2.94116e+06	3.64678e+06	1.1782e+07	1.1089e+07	4.88973e+06	2.34553e+06	5.0762e+06	48196949	2010.31	2.41901e+06	2.98788e+07	3.22228e+06	2.24205e+06	3.40889e+06	7.34029e+06	7.60317e+06	9.66591e+06	653650	7.10414e+06	2.78692e+06	3.26369e+06	2.10453e+06	8.72962e+06	4.80238e+07	134017	9.24768e+06	810.682		810.685
1	CerG1(d18:2/24:0+O)+H	CerG1(d42:2+O)+H	CerG1	(d18:2/24:0+O)	(d18:2)	(24:0+O)			826.677	C48 H92 O9 N1	6.47939e+06	2.13762e+06	963432	3.45125e+06	1.30115e+06	2.62451e+06	4.20843e+06	568280	692481	2.72836e+06	2.46026e+06	4.80726e+06	1.05016e+07	1.12841e+07	4.24858e+06	1.50402e+06	5.79267e+06	4.17753e+07	2.24732e+06	2.15703e+06	2.80638e+07	2.32812e+06	1.41237e+06	4.24944e+06	8.14637e+06	7.3438e+06	8.6843e+06	566439	7.32468e+06	3.91633e+06	3.11888e+06	1.20702e+06	6.24773e+06	3.20197e+07	310427	6.63313e+06	826.677	826.677	826.677
1	CerG1(d42:2+hO)-H	CerG1(d42:2+hO)-H	CerG1	(d42:2+hO)	(d42:2+hO)				824.662	C48 H90 O9 N1	6.86259e+06	2.96767e+06	689230	2.30575e+06	1.2579e+06	2.9176e+06	2.67545e+06	89536.2	1.20894e+06	1.782e+06	1.06523e+06	1.899e+06	6.13921e+06	5.14594e+06	2.63541e+06	5369.75	3.03722e+06	1.54453e+07	1.35909e+06	1.01954e+06	1.43711e+07	1.19711e+06	1.73633e+06	1.68393e+06	3.40367e+06	3.77026e+06	3.93753e+06	175569	3.52607e+06	1.71605e+06	1.08327e+06	1.04452e+06	3.54914e+06	1.37287e+07	356795	2.88659e+06	824.662	824.662	824.662
0	CerG1(d18:0+pO/24:2)+H	CerG1(d42:2+pO)+H	CerG1	(d18:0+pO/24:2)	(d18:0+pO)	(24:2)			826.677	C48 H92 O9 N1	1.5102e+08	7.22274e+07	1.7463e+07	4.88175e+07	2.71765e+07	6.11647e+07	6.068e+07	1.71838e+07	3.04642e+07	6.54184e+07	3.41711e+07	6.46741e+07	1.66173e+08	1.67048e+08	7.06876e+07	3.26377e+07	8.82415e+07	6.63965e+08	4.55253e+07	3.74054e+07	3.81789e+08	4.23958e+07	3.08354e+07	4.14357e+07	9.99658e+07	1.21722e+08	1.26131e+08	1.18285e+07	8.78851e+07	5.65237e+07	4.42761e+07	2.48641e+07	1.0605e+08	4.69075e+08	1.15449e+07	9.92458e+07	826.677	826.677	826.677
0	CerG1(d18:0+pO/24:2)+H-H2O	CerG1(d42:2+pO)+H-H2O	CerG1	(d18:0+pO/24:2)	(d18:0+pO)	(24:2)			808.666	C48 H90 O8 N1	6.77169e+06	3.02396e+06	429649	2.22805e+06	625379	2.50775e+06	2.68955e+06	612673	240063	5.14906e+06	1.16152e+06	3.79045e+06	5.41712e+06	7.519e+06	3.2813e+06	5768.67	5.38822e+06	3.52796e+07	1.51315e+06	5441.55	1.49619e+07	2.03889e+06	890544	1.80342e+06	3.63627e+06	4.62754e+06	4.75727e+06	334526	1.83856e+06	2.36571e+06	1.56822e+06	837680	4.85336e+06	1.99637e+07	267922	4.36293e+06	808.665	808.666	808.666
0	CerG1(d42:2+pO)-H	CerG1(d42:2+pO)-H	CerG1	(d18:0+pO/24:2)	(d18:0+pO)	(24:2)			824.662	C48 H90 O9 N1	6.91052e+06	3.01275e+06	698977	2.12646e+06	1.26003e+06	3.35222e+06	2.5895e+06	163041	1.28146e+06	2.15409e+06	1.15787e+06	2.26731e+06	6.99703e+06	6.32433e+06	2.63513e+06	1.24356e+06	3.50154e+06	1.89803e+07	1.35935e+06	1.56959e+06	1.47892e+07	1.17484e+06	1.62465e+06	1.8874e+06	3.4497e+06	5.70374e+06	3.21815e+06	167664	3.97247e+06	2.14294e+06	2.08739e+06	1.04136e+06	4.04481e+06	1.1748e+07	586016	4.86433e+06	824.658	824.658	824.662
0	CerG1(d18:2/24:1)+H	CerG1(d42:3)+H	CerG1	(d18:2/24:1)	(d18:2)	(24:1)			808.666	C48 H90 O8 N1	6.85055e+06	3.05621e+06	8400.89	3.42616e+06	1.26777e+06	4.11564e+06	4.42157e+06	1.02093e+06	748370	1.11841e+06	2.33106e+06	4.80394e+06	1.07972e+07	1.17919e+07	3.66112e+06	2.27079e+06	4.04783e+06	6.38224e+07	2.54746e+06	2.05355e+06	3.24268e+07	2.83675e+06	1.24743e+06	2.60111e+06	2.29903e+06	6.86838e+06	7.13748e+06	125367	5.26526e+06	3.16193e+06	1.46519e+06	889311	7.41389e+06	3.83022e+07	330758	6.77079e+06	808.666	808.666	808.666
0	CerG1(d18:1/24:2)+H	CerG1(d42:3)+H	CerG1	(d18:1/24:2)	(d18:1)	(24:2)			808.666	C48 H90 O8 N1	6.77169e+06	3.0945e+06	428952	2.85882e+06	625354	2.49535e+06	2.30846e+06	623085	262329	3.8875e+06	1.14095e+06	1.42154e+06	5.43245e+06	7.35367e+06	3.29672e+06	5895.62	5.00371e+06	3.26002e+07	1.54681e+06	5393.31	1.5215e+07	2.02942e+06	913899	1.77246e+06	3.54016e+06	4.93816e+06	4.78309e+06	341400	4.0069e+06	2.37901e+06	1.72348e+06	842737	4.80321e+06	1.99752e+07	270309	4.33514e+06	808.666	808.663	808.666
0	CerG1(d42:4+pO)+H-H2O	CerG1(d42:4+pO)+H-H2O	CerG1	(d42:4+pO)	(d42:4+pO)				804.635	C48 H86 O8 N1	4.21037e+06	3.51956e+06	118247	2.08195e+06	515190	1.87831e+06	4.11677e+06	763609	480833	1.84517e+06	1.17698e+06	2.89305e+06	6.66856e+06	5.46726e+06	4.01133e+06	670076	4.31086e+06	9.31625e+06	1.60443e+06	973225	8.76242e+06	1.46677e+06	1.08706e+06	1.61408e+06	4.4039e+06	6.70159e+06	3.86699e+06	301681	4.51224e+06	2.99619e+06	870898	507616	3.47908e+06	7.38413e+06	111506	4.71361e+06	804.635	804.635	804.635
0	CerG1(d18:1/24:6)+H-H2O	CerG1(d42:7)+H-H2O	CerG1	(d18:1/24:6)	(d18:1)	(24:6)			782.593	C48 H80 O7 N1	1.16479e+07	4.44072e+06	3.56492e+06	7.4064e+06	1.69324e+06	4.85054e+06	7.93255e+06	937700	2.77809e+06	4.81812e+06	2.38807e+06	4.41515e+06	1.24258e+07	9.322e+06	6.92862e+06	1.61726e+06	7.46503e+06	3.70872e+07	4.13428e+06	2.86177e+06	2.83812e+07	2.37803e+06	2.16901e+06	1.7686e+06	8.81042e+06	7.33406e+06	1.30079e+07	836523	1.02602e+07	5.93741e+06	3.32107e+06	2.24426e+06	1.10953e+07	3.63402e+07	730596	1.09509e+07	782.597	782.593	782.593
0	CerG1(d18:0+pO/25:0)+H-H2O	CerG1(d43:0+pO)+H-H2O	CerG1	(d18:0+pO/25:0)	(d18:0+pO)	(25:0)			826.713	C49 H96 O8 N1	1.27906e+06	439392	0	575219	137849	1.01376e+06	731846	154392	0	675905	605677	829188	2.54378e+06	1.65647e+06	839793	154531	1.11368e+06	6.13235e+06	3229.65	414243	4.68637e+06	333173	202829	421975	1.29165e+06	1.73393e+06	1.50018e+06	868.354	1.45695e+06	747395	616119	372898	1.30077e+06	5.87473e+06	0	1.52728e+06	826.713	826.713
0	CerG1(d18:1/25:0)+H	CerG1(d43:1)+H	CerG1	(d18:1/25:0)	(d18:1)	(25:0)			826.713	C49 H96 O8 N1	1.21709e+06	488033	0	562651	139286	1.17224e+06	685570	154392	0	675905	424374	829188	2.52101e+06	251110	953329	68923.5	1.11368e+06	1.44923e+06	173028	0	4.70782e+06	344646	198661	97659.2	1.27448e+06	1.73393e+06	1.50018e+06	154475	890060	707766	616760	367356	1.5864e+06	5.51726e+06	0	990624	826.713	826.713
0	CerG1(d18:1/25:0+O)+H	CerG1(d43:1+O)+H	CerG1	(d18:1/25:0+O)	(d18:1)	(25:0+O)			842.708	C49 H96 O9 N1	8.57435e+06	5.35472e+06	1.10507e+06	2.93526e+06	1.99251e+06	4.12645e+06	2.95931e+06	340346	1.36439e+06	3.32021e+06	1.58663e+06	3.1953e+06	9.42708e+06	9.04725e+06	4.48124e+06	1.93509e+06	5.01506e+06	3.15601e+07	2.60666e+06	2.98584e+06	2.02338e+07	2.53216e+06	2.17465e+06	2.09693e+06	6.05577e+06	5.86828e+06	9.15289e+06	739701	5.55169e+06	3.69558e+06	3.32659e+06	2.1255e+06	6.81517e+06	2.83653e+07	753968	8.55405e+06	842.708	842.709	842.708
0	CerG1(d18:0+pO/25:1)+H-H2O	CerG1(d43:1+pO)+H-H2O	CerG1	(d18:0+pO/25:1)	(d18:0+pO)	(25:1)			824.697	C49 H94 O8 N1	5.30694e+06	4.00868e+06	487428	2.14761e+06	711094	2.64287e+06	2.41492e+06	235118	750856	2.45558e+06	894450	2.90985e+06	8.06069e+06	8.59743e+06	3.39559e+06	1.33083e+06	3.95252e+06	3.59418e+07	1.85586e+06	1.7738e+06	1.76235e+07	2.59162e+06	1.3544e+06	1.49413e+06	5.09513e+06	4.20173e+06	6.68127e+06	214668	4.04317e+06	2.14974e+06	1.20802e+06	1.34827e+06	4.48397e+06	2.29062e+07	630505	4.31734e+06	824.697	824.697	824.697
0	CerG1(d18:1/25:1)+H	CerG1(d43:2)+H	CerG1	(d18:1/25:1)	(d18:1)	(25:1)			824.697	C49 H94 O8 N1	5.2662e+06	3.2143e+06	584.658	2.1384e+06	709031	2.63355e+06	2.41073e+06	4353.2	828234	2.49043e+06	864941	2.89076e+06	7.78847e+06	8.84212e+06	3.33775e+06	1.3448e+06	3.96304e+06	3.35586e+07	1.88702e+06	1.77729e+06	1.65532e+07	2.52948e+06	12170.4	1.49312e+06	5.15624e+06	4.45729e+06	6.08139e+06	222601	3.66547e+06	2.12855e+06	1.16066e+06	3600.62	4.48397e+06	2.27322e+07	595000	4.30611e+06	824.697	824.697	824.697
0	CerG1(d18:0+pO/25:2)+H	CerG1(d43:2+pO)+H	CerG1	(d18:0+pO/25:2)	(d18:0+pO)	(25:2)			840.692	C49 H94 O9 N1	6.0528e+06	3.11963e+06	4157.03	1.44409e+06	837.398	2.05242e+06	2.34957e+06	177799	1.14233e+06	2.01717e+06	1.22333e+06	2.28803e+06	6.60951e+06	6.2272e+06	19909.1	1.48979e+06	9546.76	2.21076e+07	1.3786e+06	1.51847e+06	8.44999e+06	1.17753e+06	3971.34	1.3096e+06	3.52523e+06	3.7126e+06	4.80953e+06	1966.71	3.55216e+06	1.88512e+06	1.49827e+06	4563.72	3.3275e+06	1.26994e+07	114049	3.46287e+06	840.692	840.692	840.692
0	CerG1(d18:0+pO/25:4)+H-H2O	CerG1(d43:4+pO)+H-H2O	CerG1	(d18:0+pO/25:4)	(d18:0+pO)	(25:4)			818.65	C49 H88 O8 N1	1.54428e+06	379522	0	0	0	0	0	0	0	0	344023	0	3.43237e+06	4.816e+06	311197	328958	51192.8	1.51275e+07	0	3424.34	3.02242e+06	365324	0	0	33640.2	985534	538642	0	379045	0	0	0	708360	5.15245e+06	0	0	818.65	818.65
0	CerG1(d18:0+pO/26:0)+H-H2O	CerG1(d44:0+pO)+H-H2O	CerG1	(d18:0+pO/26:0)	(d18:0+pO)	(26:0)			840.729	C50 H98 O8 N1	0	0	0	0	0	0	0	0	0	50192.1	0	0	0	202082	0	0	0	36283.3	0	0	675748	0	0	0	0	0	186629	0	0	0	0	0	203518	800240	0	214278
0	CerG1(d18:1/26:0+O)+H	CerG1(d44:1+O)+H	CerG1	(d18:1/26:0+O)	(d18:1)	(26:0+O)			856.724	C50 H98 O9 N1	4.24667e+06	378748	0	257408	171055	557537	288173	0	6074.57	1.29189e+06	207181	702916	1.98801e+06	4.43928e+06	4598.01	164934	639246	1.74682e+07	182117	486142	4.21616e+06	198446	154890	298695	1.72595e+06	650918	1.10873e+06	0	740720	301027	322856	0	1.1188e+06	9.64215e+06	0	3.27656e+06	856.724	856.724
0	CerG1(d18:0+pO/26:1)+H-H2O	CerG1(d44:1+pO)+H-H2O	CerG1	(d18:0+pO/26:1)	(d18:0+pO)	(26:1)			838.713	C50 H96 O8 N1	1.16342e+06	244558	151761	379467	0	428602	379936	0	0	246760	168999	661366	2.02652e+06	805771	136215	97091.8	537511	5.44493e+06	297161	0	5.78414e+06	106758	0	666830	1.12409e+06	448649	1.30121e+06	0	1.13395e+06	457123	235496	0	1.07958e+06	6.63307e+06	0	830481	838.713	838.713	838.713
0	CerG1(d18:1/26:1)+H	CerG1(d44:2)+H	CerG1	(d18:1/26:1)	(d18:1)	(26:1)			838.713	C50 H96 O8 N1	1.1006e+06	287548	155932	376297	0	455529	218963	0	0	273154	172886	592975	2.03703e+06	1.67621e+06	137521	217887	572075	9.25237e+06	341179	0	5.6273e+06	409649	0	648340	1.14534e+06	649151	1.66463e+06	0	1.36068e+06	511430	243544	0	1.19006e+06	7.04563e+06	0	946540	838.713	838.713	838.713
0	CerG1(d44:4+pO)+H-H2O	CerG1(d44:4+pO)+H-H2O	CerG1	(d44:4+pO)	(d44:4+pO)				832.666	C50 H90 O8 N1	7.18125e+07	4.76794e+07	1.19139e+07	4.11944e+07	1.86609e+07	4.33464e+07	5.15767e+07	1.31084e+07	1.62635e+07	3.39483e+07	2.53639e+07	5.32527e+07	8.4887e+07	9.44949e+07	4.81622e+07	2.90999e+07	6.71304e+07	1.13513e+08	3.05379e+07	2.83745e+07	1.20461e+08	4.28712e+07	2.66891e+07	3.63468e+07	7.17943e+07	7.87222e+07	6.99334e+07	8.51541e+06	6.97677e+07	4.70786e+07	3.71015e+07	1.76984e+07	6.61315e+07	1.1779e+08	9.95708e+06	5.61653e+07	832.666	832.666	832.666
0	CerG1(d44:5+pO)+H-H2O	CerG1(d44:5+pO)+H-H2O	CerG1	(d44:5+pO)	(d44:5+pO)				830.65	C50 H88 O8 N1	5.03333e+06	2.23267e+06	296423	1.01881e+06	3566.91	2.37205e+06	4.19852e+06	197585	53649.9	823321	1.02841e+06	3.8791e+06	8.03625e+06	6.94479e+06	4.21771e+06	226213	4.43306e+06	1.8768e+07	1.4237e+06	289355	1.76277e+07	1.07466e+06	67090	605056	5.17923e+06	5.78308e+06	7.60156e+06	98266.1	5.04947e+06	1.03923e+06	842248	370536	5.53421e+06	1.80248e+07	0	4.98908e+06	830.65	830.65	830.65
0	CerG1(d18:1/29:3)+H-H2O	CerG1(d47:4)+H-H2O	CerG1	(d18:1/29:3)	(d18:1)	(29:3)			858.718	C53 H96 O7 N1	7.52633e+06	2.54128e+06	0	1.25582e+06	336959	2.48776e+06	2.23415e+06	0	108610	794469	695744	1.58462e+06	5.2626e+06	4.75571e+06	2.60744e+06	4958.64	3.34662e+06	1.16434e+07	539402	300593	1.2008e+07	4590.92	486157	1.24882e+06	4.03768e+06	4.06219e+06	5.09454e+06	0	5.00646e+06	1.37605e+06	1.15954e+06	304177	5.38676e+06	1.01362e+07	0	4.86408e+06	858.714	858.718
0	CerG1(d48:4)+H-H2O	CerG1(d48:4)+H-H2O	CerG1	(d48:4)	(d48:4)				872.734	C54 H98 O7 N1	9903.59	913694	0	5682.25	0	545494	222562	0	0	2784.84	0	0	3.18894e+06	4.02901e+06	2110.68	0	10413.4	1.54693e+07	825.242	205282	6552.19	129121	0	0	1.99657e+06	10805	22860	0	9578.59	981.88	0	0	2.05883e+06	1.06443e+07	0	1.44537e+06	872.734	872.734
0	CerG1(d49:4)+H-H2O	CerG1(d49:4)+H-H2O	CerG1	(d49:4)	(d49:4)				886.749	C55 H100 O7 N1	1.00803e+07	2.84655e+06	0	1.19118e+06	0	2.84429e+06	1.42868e+06	0	172044	1.06975e+06	320822	2.51611e+06	1.27608e+07	1.20272e+07	3.02798e+06	843497	3.34852e+06	4.49544e+07	560889	606503	2.58727e+07	1.00057e+06	713780	1.15107e+06	6.40106e+06	6.22709e+06	7.69859e+06	0	3.63251e+06	2.07916e+06	1.27461e+06	414790	5.62644e+06	4.35303e+07	0	6.46192e+06	886.745	886.745
0	CerG1(d49:5)+H-H2O	CerG1(d49:5)+H-H2O	CerG1	(d49:5)	(d49:5)				884.734	C55 H98 O7 N1	4.54113e+06	960551	0	384546	0	666526	262645	0	0	761979	175717	705799	5.72923e+06	5.54702e+06	962269	0	1.27212e+06	1.40402e+07	0	2639.89	1.27347e+07	0	0	136542	2.29757e+06	2.3455e+06	3.07285e+06	0	1.03716e+06	273106	0	0	1.69588e+06	1.34679e+07	0	1.55013e+06	884.73	884.734
0	CerG1(d50:3)+H-H2O	CerG1(d50:3)+H-H2O	CerG1	(d50:3)	(d50:3)				902.781	C56 H104 O7 N1	1.18026e+07	6.00277e+06	620950	3.26237e+06	1.74102e+06	5.00564e+06	3.65928e+06	635982	1.38838e+06	2.43327e+06	2.17856e+06	3.48419e+06	9.69272e+06	9.85648e+06	4.2259e+06	1.94263e+06	6.17844e+06	2.11932e+07	2.93188e+06	1.21196e+06	1.15363e+07	2.73578e+06	2.09229e+06	2.13799e+06	9.26927e+06	9.16648e+06	8.88854e+06	742941	8.26803e+06	4.3234e+06	3.73631e+06	1.8184e+06	8.62021e+06	1.76685e+07	285578	8.51932e+06	902.781	902.781	902.781
0	CerG1(d50:3)+H-H2O	CerG1(d50:3)+H-H2O	CerG1	(d50:3)	(d50:3)				902.781	C56 H104 O7 N1	1.10987e+06	672348	0	367919	175640	415508	869239	0	74412.6	253916	0	62618.8	2.1627e+06	608890	352743	0	627418	3.11588e+06	237892	174742	2.9845e+06	387111	320314	231256	1.0252e+06	2.26527e+06	621405	135456	778370	556277	0	163276	748887	3.8216e+06	0	945901	902.781	902.781
0	CerG1(d51:4)+H-H2O	CerG1(d51:4)+H-H2O	CerG1	(d51:4)	(d51:4)				914.781	C57 H104 O7 N1	1.54968e+06	793981	0	136401	0	259021	356864	134658	110351	863269	128731	658624	2.66229e+06	2.79244e+06	351426	259413	1.08483e+06	7.90108e+06	492891	166184	3.58053e+06	3357.24	265145	229027	961854	1.41979e+06	1.86319e+06	0	1.47577e+06	680490	551742	0	1.19012e+06	8.65593e+06	0	905690	914.781	914.781
0	CerP(d18:1/30:4)+H	CerP(d48:5)+H	CerP	(d18:1/30:4)	(d18:1)	(30:4)			806.642	C48 H89 O6 N1 P1	4.29077e+06	778083	63834	1.68835e+06	0	755111	2.01956e+06	0	741253	1.50665e+06	219944	862226	3.08878e+06	741688	2.61479e+06	0	2.18449e+06	2.45532e+06	1.00902e+06	78271.1	479902	63004.3	149811	3642.84	1.36699e+06	1.6711e+06	4.4169e+06	0	3.56805e+06	1.44862e+06	1.12854e+06	162506	4.42099e+06	5.76364e+06	0	4.775e+06	806.636		806.642
0	CerP(d62:2EO)+H	CerP(d62:2EO)+H	CerP	(d62:2EO)	(d62:2EO)				1038.88	C62 H121 O8 N1 P1	1.23879e+06	910777	0	749032	340986	678361	0	0	0	456606	389896	936398	4.56972e+06	2.49354e+06	1.10582e+06	0	1.43539e+06	1.17057e+07	247826	388289	7.78327e+06	0	271780	196646	1.90374e+06	2.34573e+06	1.67837e+06	0	1.58179e+06	804667	735446	416150	2.48824e+06	1.83497e+07	0	3.29345e+06	1038.88	1038.88
0	CerP(d64:3EO)+H	CerP(d64:3EO)+H	CerP	(d64:3EO)	(d64:3EO)				1064.9	C64 H123 O8 N1 P1	1.96891e+06	406371	0	0	0	1.13185e+06	741051	0	0	445783	0	0	3.32744e+06	2.30917e+06	548791	6097.38	1.7576e+06	1.22146e+07	0	0	9.14283e+06	0	0	0	880937	805261	1.53717e+06	0	714564	409845	0	0	726996	1.93111e+07	0	2.46025e+06	1064.9	1064.9
0	ChE(22:6)+NH4	ChE(22:6)+NH4	ChE	(22:6)	(22:6)				714.618	C49 H80 O2 N1	3.65111e+06	1.12296e+07	262393	2.07656e+06	452769	607541	0	191399	1.09795e+06	6.92898e+06	0	1.49299e+06	1.007e+06	2.10654e+06	202403	520179	292009	5.57077e+06	0	0	2.17213e+06	360823	0	0	636097	1.64958e+06	2.3094e+06	683238	3.16614e+06	3.1477e+06	1.42976e+06	170585	1.57252e+06	6.37207e+06	0	8.20729e+06	714.618	714.618	714.618
0	Co(Q10)+NH4	Co(Q10)+NH4	Co	(Q10)	(Q10)				880.718	C59 H94 O4 N1	2.60326e+06	1.55079e+06	440869	3.09191e+06	519666	1.7004e+06	2.85527e+06	283966	1.05398e+06	1.95951e+06	765326	1.6334e+06	6.41761e+06	3.42878e+06	2.38628e+06	584906	2.9568e+06	1.55217e+07	1.46405e+06	1.89551e+06	1.14484e+07	968742	555091	766325	2.11001e+06	1.91003e+06	4.67962e+06	0	4.91681e+06	2.05924e+06	2.08419e+06	1.26848e+06	4.17196e+06	1.35737e+07	545080	6.21685e+06	880.718	880.718	880.718
0	DG(4:0/10:3)+NH4	DG(14:3)+NH4	DG	(4:0/10:3)	(4:0)	(10:3)			328.212	C17 H30 O5 N1	1.24786e+07	8.67906e+06	4.27062e+06	8.81832e+06	1.09932e+07	1.33589e+06	6.37048e+06	1.1117e+07	6.91466e+06	1.24422e+07	4.77233e+06	5.9581e+06	5.63716e+06	7.30974e+06	4.38618e+06	3.3203e+06	7.09995e+06	1.01442e+07	4.12071e+06	7.70101e+06	3.20263e+06	7.18931e+06	3.24283e+06	3.97835e+06	1.12629e+06	4.12559e+06	3.83718e+06	4.49633e+06	8.20057e+06	1.11249e+07	6.34702e+06	3.35788e+06	7.00992e+06	1.04632e+07	5.18936e+06	2.6812e+06	328.212	328.212	328.212
0	DG(15:2)+NH4	DG(15:2)+NH4	DG	(15:2)	(15:2)				344.243	C18 H34 O5 N1	17811.5	7.07739e+06	981402	584733	282678	1.03988e+06	1.05855e+07	2.16265e+06	1.04304e+07	6.10651e+06	1.64323e+06	1.18116e+07	466962	355256	927691	966943	5.83486e+06	273386	3.19653e+06	1.17164e+07	2.89258e+06	1.02038e+06	183914	746812	983997	3.0073e+06	5.94605e+06	1.2005e+06	709143	7.00286e+06	1.09186e+07	3.46813e+06	874775	1.19793e+06	1.17321e+06	785263	344.243	344.243	344.243
0	DG(17:0)+NH4	DG(17:0)+NH4	DG	(17:0)	(17:0)				376.306	C20 H42 O5 N1	4.31821e+06	4.97972e+06	5.58688e+06	6.21731e+06	2.59556e+06	2.32077e+06	1.02261e+07	5.06252e+06	4.04261e+06	5.31095e+06	5.51553e+06	7.06535e+06	3.11829e+06	4.64745e+06	4.87511e+06	4.24279e+06	6.17373e+06	5.40462e+06	7.3758e+06	4.96194e+06	5.25163e+06	4.92834e+06	1.81734e+06	2.97207e+06	2.97913e+06	4.44004e+06	5.19128e+06	4.34308e+06	5.89454e+06	5.20566e+06	5.57394e+06	1.88049e+06	5.31082e+06	6.17777e+06	5.99707e+06	5.52588e+06	376.306	376.306	376.306
0	DG(6:0/11:3)+NH4	DG(17:3)+NH4	DG	(6:0/11:3)	(6:0)	(11:3)			370.259	C20 H36 O5 N1	1.01177e+07	7.76819e+06	1.67507e+07	1.61328e+07	3.79845e+07	5.20681e+06	1.06267e+07	1.32162e+07	6.19346e+06	9.48279e+06	1.08685e+07	1.28998e+07	7.25583e+06	8.65368e+06	9.13044e+06	1.05225e+07	7.85489e+06	1.54094e+07	5.83175e+06	8.3425e+06	8.55654e+06	1.00831e+07	3.84918e+06	5.96828e+06	5.35515e+06	7.96279e+06	1.02762e+07	6.54107e+06	1.16797e+07	1.18743e+07	5.87976e+06	7.03685e+06	1.22807e+07	8.87764e+06	8.66025e+06	1.05619e+07	370.259	370.259	370.259
0	DG(21:2e)+NH4	DG(21:2e)+NH4	DG	(21:2e)	(21:2e)				414.358	C24 H48 O4 N1	145546	174756	3.12306e+06	2.68166e+06	142906	1.2437e+06	210396	489727	1.53178e+07	192130	142680	279432	1.32797e+06	824963	145174	397782	439350	920896	751307	304042	271544	803660	161857	472427	213623	394330	460988	294223	1.80882e+06	868005	333032	377654	38952.8	1.80206e+06	551415	122535	414.358	414.358	414.358
0	DG(23:0p)+NH4	DG(23:0p)+NH4	DG	(23:0p)	(23:0p)				444.405	C26 H54 O4 N1	1.68447e+06	1.51273e+06	1.82365e+06	3.20008e+06	484054	1.09525e+06	2.46653e+06	1.50381e+06	3.82633e+06	3.8468e+06	1.68457e+06	1.56323e+06	61284.1	168098	351671	73837.2	750612	106111	127567	80608.6	144681	104372	58851.3	353845	53986.6	149641	46991.1	182908	217223	248094	349938	556235	76778.9	42293.9	479704	83809.3	444.405	444.405	444.404
0	DG(18:0/16:0)+NH4	DG(34:0)+NH4	DG	(18:0/16:0)	(18:0)	(16:0)			614.572	C37 H76 O5 N1	991124	716141	637281	1.03927e+06	248198	597122	659046	97390.7	815837	844401	351622	217325	631080	330722	302322	401282	509220	438558	557439	454469	812413	363468	854778	701877	545638	543935	1.0793e+06	386779	706122	1.09225e+06	901948	734098	606532	626631	578389	142449	614.572	614.572
0	DG(16:0/18:1)+NH4	DG(34:1)+NH4	DG	(16:0/18:1)	(16:0)	(18:1)			612.556	C37 H74 O5 N1	2.11622e+06	2.00503e+06	77112	2.02273e+06	679805	3.09819e+06	1.39858e+06	114962	1.12615e+06	1.39791e+06	322103	3.1146e+06	1.04462e+07	2.95636e+06	2.38827e+06	427170	3.81607e+06	2.89026e+06	1.01973e+06	1.35816e+06	1.14701e+07	1.55018e+06	1.18048e+06	1.52637e+06	3.48167e+06	2.48035e+06	205160	194714	1.5563e+06	1.60111e+06	1.19531e+06	1.50118e+06	1.79625e+06	1.45899e+07	173328	4.52539e+06	612.557	612.556	612.556
0	DG(18:0/18:0)+NH4	DG(36:0)+NH4	DG	(18:0/18:0)	(18:0)	(18:0)			642.603	C39 H80 O5 N1	731661	595539	653750	297895	687566	555715	759680	911248	541318	300285	335571	304360	459059	74254.7	1.02025e+06	246365	738043	96836	1.26419e+06	24158.9	876077	466922	2.19943e+06	854073	719529	307126	472062	866152	558962	469805	632659	764204	677995	785582	66506.5	649086	642.603	642.603	642.603
0	DG(18:0/18:1)+NH4	DG(36:1)+NH4	DG	(18:0/18:1)	(18:0)	(18:1)			640.587	C39 H78 O5 N1	1.99207e+06	233509	89392.5	832080	2088.86	1.66724e+06	763992	2465.39	488719	348169	327230	1.72757e+06	6.73422e+06	2.72033e+06	1.15481e+06	173234	1.85885e+06	1.97435e+07	305401	130311	8.03488e+06	771916	522756	624164	1.81445e+06	2.34373e+06	3.37938e+06	0	2.36508e+06	470657	291258	338155	1.83523e+06	1.03973e+07	0	2.65725e+06	640.587	640.587	640.587
0	DG(18:1/18:1)+NH4	DG(36:2)+NH4	DG	(18:1/18:1)	(18:1)	(18:1)			638.572	C39 H76 O5 N1	1.09052e+06	471542	3316.69	938411	5901.59	1.07037e+06	467308	169432	209978	975970	2035.03	1.18251e+06	4.62654e+06	874465	708233	106.945	1.39177e+06	9.36089e+06	9357.45	667202	7.26211e+06	481611	667948	235017	984538	2.08011e+06	1.94256e+06	36996.6	759487	534769	257175	422714	1.11824e+06	6.99563e+06	241681	2.08499e+06	638.572	638.572	638.572
0	DG(16:0/20:4)+NH4	DG(36:4)+NH4	DG	(16:0/20:4)	(16:0)	(20:4)			634.541	C39 H72 O5 N1	743147	152584	4818.31	838214	1388.15	1.42541e+06	1.11133e+06	112140	501710	643230	384.286	1.05365e+06	8.27677e+06	1.96475e+06	1.96666e+06	235320	2.77361e+06	1.97258e+07	370401	840688	3.85541e+06	313402	310890	134862	2.42574e+06	1.90474e+06	2.97046e+06	79668.1	657072	530977	700048	13668.1	4.66081e+06	1.82437e+07	718.58	3.78084e+06	634.54	634.54	634.54
0	DG(18:1/18:3)+H	DG(36:4)+H	DG	(18:1/18:3)	(18:1)	(18:3)			617.514	C39 H69 O5	1.67806e+06	739954	203307	1.75662e+06	227490	2.56174e+06	1.66052e+06	715.716	805989	1.0734e+06	579129	1.77094e+06	8417268	3.13434e+06	2.29405e+06	398254	2.2199e+06	1.52802e+07	872576	761782	1.09409e+07	724220	500446	275550	2.64464e+06	2.11056e+06	4.24629e+06	122263	2.54014e+06	1.5804e+06	365095	1.15409e+06	4.71467e+06	1.09513e+07	159070	4.28046e+06	617.514	617.514	617.514
0	DG(18:0/20:4)+NH4	DG(38:4)+NH4	DG	(18:0/20:4)	(18:0)	(20:4)			662.572	C41 H76 O5 N1	7.37945e+06	2.87734e+06	2.09713e+06	6.19466e+06	1.16956e+06	7.44152e+06	7.28628e+06	118440	1.26566e+06	4.30577e+06	2.40738e+06	6.43245e+06	4.23079e+07	1.07165e+07	7.5876e+06	15512	7.83347e+06	8.42312e+06	2.21726e+06	2.33885e+06	1.62724e+07	3.03284e+06	2.53209e+06	2.2919e+06	5.07744e+06	6.80821e+06	1.80087e+07	934246	9.04424e+06	2.77146e+06	6.33263e+06	7.78715e+06	7.51394e+06	1.03218e+07	1.64255e+06	1.61532e+07	662.572	662.571	662.571
0	DG(18:0/20:4)+H	DG(38:4)+H	DG	(18:0/20:4)	(18:0)	(20:4)			645.545	C41 H73 O5	1.3416e+06	105980	0	508464	0	927336	642269	0	302124	269916	86218.1	700473	4.80962e+06	1.67912e+06	902332	76431.5	409010	1.03074e+07	2726.52	343166	5.76203e+06	220775	273393	137671	1.84999e+06	1.3673e+06	1.74519e+06	0	638672	598615	132087	167475	2.00388e+06	8.5285e+06	0	1.49475e+06	645.545	645.545
0	DG(18:1/20:4)+H	DG(38:5)+H	DG	(18:1/20:4)	(18:1)	(20:4)			643.53	C41 H71 O5	646388	227116	69623.4	124611	0	2130.27	3944.74	0	441711	134584	0	240280	3.53365e+06	870632	236002	122405	658865	4.89076e+06	0	252245	2.1615e+06	3322.41	2714.39	0	493706	560384	476266	0	3375.23	154423	0	47853	699588	3.05257e+06	528.155	473594	643.53	643.53	643.53
0	DG(18:3/20:4)+H	DG(38:7)+H	DG	(18:3/20:4)	(18:3)	(20:4)			639.498	C41 H67 O5	745005	224886	110832	700893	107558	752669	562713	0	388601	492937	36673.5	1.47832e+06	5.07814e+06	1.05918e+06	741269	0	2.25773e+06	8.0835e+06	462790	409370	5.82855e+06	229795	518301	123383	2.74637e+06	1.39626e+06	2.06455e+06	0	629475	250283	302517	758506	3.22383e+06	7.61715e+06	0	2.33802e+06	639.498	639.498	639.498
0	DG(18:0/22:6)+NH4	DG(40:6)+NH4	DG	(18:0/22:6)	(18:0)	(22:6)			686.572	C43 H76 O5 N1	0	0	0	283098	0	617918	0	0	276060	0	0	587390	3.66625e+06	0	0	0	602364	7.00314e+06	0	0	3.60342e+06	0	0	5340.9	312155	237968	690019	0	0	0	0	3202.27	945204	4.37587e+06	0	1.31799e+06
0	DG(20:3/20:4)+H	DG(40:7)+H	DG	(20:3/20:4)	(20:3)	(20:4)			667.53	C43 H71 O5	5.22989e+06	891498	510681	3.16922e+06	283671	4.6035e+06	2.93162e+06	3129.68	1.93672e+06	2.58061e+06	441979	2.6876e+06	1.87703e+07	5.27657e+06	3.59009e+06	739465	8.71469e+06	3.47016e+07	2.14986e+06	1.66569e+06	3.15653e+07	1.84431e+06	1.3336e+06	1.0472e+06	8.19587e+06	6.36085e+06	8.65934e+06	262976	4.24334e+06	1.97429e+06	1.61373e+06	3.26396e+06	1.32805e+07	2.827e+07	311110	8.30923e+06	667.53	667.53	667.53
0	GD1a(d16:0/20:1)-2H	GD1a(d36:1)-2H	GD1a	(d16:0/20:1)	(d16:0)	(20:1)			917.479	C84 H146 O39 N4	1.26648e+06	0	0	0	0	8.37603e+06	650693	0	261614	0	1.18856e+06	646782	1.82059e+07	67751.7	8.9912e+06	4.53472e+06	689212	1.27291e+06	211989	0	3.57909e+06	0	148848	227240	1.57258e+06	0	1.02321e+07	0	122156	0	0	1.42812e+06	838229	3.36702e+06	0	98852.3	917.479
0	GD1a(d38:0)-2H	GD1a(d38:0)-2H	GD1a	(d38:0)	(d38:0)				932.502	C86 H152 O39 N4	0	0	0	0	0	369464	0	43889.7	0	0	87974.2	0	1.08005e+06	0	450828	0	2673.68	0	0	0	0	0	0	0	0	0	381155	0	0	0	0	0	0	0	0	0
0	GD1a(d16:0/22:1)-2H	GD1a(d38:1)-2H	GD1a	(d16:0/22:1)	(d16:0)	(22:1)			931.494	C86 H150 O39 N4	154641	0	0	0	0	157375	0	0	0	38818.5	0	0	2.17275e+06	0	1.52556e+06	0	0	202805	0	0	1509.37	0	0	0	0	0	1.10065e+06	0	0	0	0	0	142577	343944	0	0	931.494
0	GD1b(d16:0/20:1)-2H	GD1b(d36:1)-2H	GD1b	(d16:0/20:1)	(d16:0)	(20:1)			917.479	C84 H146 O39 N4	1.01724e+06	0	0	0	0	8.37835e+06	628680	0	262768	0	421894	285635	1.82501e+07	0	8.80693e+06	4.35457e+06	664083	4.17254e+06	211153	0	4.55883e+06	0	692354	232686	1.58402e+06	0	9.93298e+06	0	142638	0	0	1.40388e+06	815996	1.70219e+06	0	98548.4	917.479
0	LPC(16:0)+HCOO	LPC(16:0)+HCOO	LPC	(16:0)	(16:0)				540.331	C25 H51 O9 N1 P1	1.01013e+07	5.3846e+06	2.39671e+06	5.67357e+06	4.30837e+06	5.0978e+06	9.42072e+06	932686	3.41623e+06	5.03e+06	5.47817e+06	2.45499e+06	1.05081e+07	8.13122e+06	3.78833e+06	483176	3.76341e+06	2.51466e+07	4.52232e+06	2.03789e+06	2.15935e+07	677589	1.37298e+06	1.64876e+06	2.27001e+06	2.74508e+06	8.01875e+06	269803	1.0064e+07	3.35309e+06	6.21105e+06	2.8628e+06	5.44203e+06	2.11323e+07	2.61418e+06	6.95687e+06	540.331	540.331	540.331
0	LPC(16:0)+H	LPC(16:0)+H	LPC	(16:0)	(16:0)				496.34	C24 H51 O7 N1 P1	6.11665e+07	3.0991e+07	1.62121e+07	3.46383e+07	2.516e+07	2.81661e+07	5.31588e+07	1.09789e+07	2.02836e+07	3.03931e+07	3.53206e+07	1.51224e+07	6.22301e+07	5.19631e+07	2.32059e+07	6.79174e+06	2.30762e+07	1.62355e+08	2.54931e+07	1.23887e+07	1.32525e+08	5.83319e+06	1.04084e+07	9.6176e+06	1.42282e+07	2.07823e+07	4.59404e+07	4.04616e+06	5.81116e+07	2.1733e+07	3.59228e+07	1.69845e+07	3.04559e+07	1.27692e+08	1.63838e+07	4.32826e+07	496.34	496.34	496.34
0	LPC(18:0)+H	LPC(18:0)+H	LPC	(18:0)	(18:0)				524.371	C26 H55 O7 N1 P1	3.81232e+06	1.85518e+06	523371	1.81534e+06	438943	65817.5	3.39191e+06	549091	422251	1.47049e+06	1.51475e+06	104967	324130	2.53255e+06	705374	55279.5	786794	1.74465e+06	1.31954e+06	881036	3.03939e+06	968.422	36725.6	0	428162	860213	1.16322e+06	0	3.76682e+06	969212	1.20528e+06	373.998	786339	2.08194e+06	507690	749700	524.371	524.371	524.371
0	LPC(18:0)+HCOO	LPC(18:0)+HCOO	LPC	(18:0)	(18:0)				568.362	C27 H55 O9 N1 P1	4.8193e+06	2.3068e+06	1.09166e+06	3.3507e+06	1.47367e+06	2.17779e+06	3.3034e+06	845758	1.94987e+06	2.97995e+06	2.04337e+06	1.86925e+06	5.84962e+06	4.20301e+06	3.1103e+06	680515	2.84062e+06	1.49646e+07	2.17263e+06	1.26119e+06	1.34387e+07	434959	985499	827896	2.32353e+06	1.95266e+06	5.32651e+06	85016.5	5.20716e+06	2.31023e+06	2.40623e+06	1.79544e+06	3.61692e+06	1.31139e+07	1.03554e+06	4.45189e+06	568.362	568.362	568.362
0	LPC(18:0)+H	LPC(18:0)+H	LPC	(18:0)	(18:0)				524.371	C26 H55 O7 N1 P1	2.67797e+07	1.47911e+07	7.61145e+06	1.73641e+07	7.94683e+06	1.24859e+07	2.30733e+07	4.1219e+06	1.07457e+07	1.51898e+07	1.13083e+07	8.89137e+06	3.31133e+07	2.70069e+07	1.64636e+07	4.99981e+06	1.5405e+07	9.12148e+07	1.24723e+07	9.38844e+06	7.38798e+07	4.54704e+06	5.87796e+06	6.02965e+06	9.6547e+06	1.31135e+07	2.92983e+07	1.96621e+06	2.94275e+07	1.34265e+07	1.34478e+07	6.93164e+06	2.11041e+07	7.67672e+07	6.09011e+06	2.50726e+07	524.371	524.371	524.371
0	LPC(18:1)+HCOO	LPC(18:1)+HCOO	LPC	(18:1)	(18:1)				566.346	C27 H53 O9 N1 P1	1.66652e+06	1.54806e+06	667594	2.2162e+06	2.24041e+06	964847	3.17645e+06	116158	639831	1.81846e+06	2.57403e+06	431162	1.9e+06	2.22062e+06	376167	95763.8	1.33489e+06	5.70346e+06	908872	246309	5.48359e+06	37649.2	127030	71973.8	407721	436764	1.69559e+06	108295	4.29782e+06	900195	2.3697e+06	671527	877659	4.66403e+06	910866	1.49708e+06	566.346	566.346	566.346
0	LPC(18:1)+H	LPC(18:1)+H	LPC	(18:1)	(18:1)				522.355	C26 H53 O7 N1 P1	2.6097e+07	1.15211e+07	6.83091e+06	1.26713e+07	1.28925e+07	8.05069e+06	2.02861e+07	4.15073e+06	5.62162e+06	1.0632e+07	1.72623e+07	4.20806e+06	1.48813e+07	1.70773e+07	6.24178e+06	1.4516e+06	8.09706e+06	3.56885e+07	9.34193e+06	3.54683e+06	3.02183e+07	1.25398e+06	2.75997e+06	2.48147e+06	3.64066e+06	6.50891e+06	1.26037e+07	1.32032e+06	2.51863e+07	7.10362e+06	1.70623e+07	4.36326e+06	8.15145e+06	3.00781e+07	6.71561e+06	1.16468e+07	522.356	522.355	522.356
0	LPC(18:3)+H	LPC(18:3)+H	LPC	(18:3)	(18:3)				518.324	C26 H49 O7 N1 P1	2.00992e+06	247745	327627	669889	377879	938901	1.7047e+06	106087	269193	557585	975213	147549	1.84785e+06	1.33052e+06	531320	0	323300	5.19345e+06	1.05848e+06	52910.9	4.10436e+06	79472.3	161601	761.909	118418	358576	1.23299e+06	37340.1	1.70282e+06	379396	851828	295543	834045	4.45469e+06	273037	976297	518.322	518.324	518.324
0	LPC(20:1)+H	LPC(20:1)+H	LPC	(20:1)	(20:1)				550.387	C28 H57 O7 N1 P1	2.01054e+06	1.76454e+06	138395	850693	211580	105113	1.00422e+06	58759.3	219687	261312	578560	216855	1.60214e+06	1.51053e+06	211113	54936.1	465008	3.77828e+06	260031	52218.9	2.95133e+06	0	44529	0	253452	949465	1.17371e+06	0	1.53395e+06	730276	729290	83751	765860	3.16123e+06	163070	805337	550.387	550.387	550.387
0	LPC(20:3)+H	LPC(20:3)+H	LPC	(20:3)	(20:3)				546.355	C28 H53 O7 N1 P1	635181	279756	0	39359.4	7586.96	207838	194570	9934.82	187868	217867	144003	90012.2	932367	630837	93061.8	309.428	29925.2	3.28063e+06	2569.41	0	970588	0	28737.7	66532.7	101475	249515	794715	0	1.10157e+06	76241.4	37324.8	1472.89	312567	2.55769e+06	15548.1	644816	546.355	546.355
0	LPC(20:4)+H	LPC(20:4)+H	LPC	(20:4)	(20:4)				544.34	C28 H51 O7 N1 P1	1.90527e+06	1.16768e+06	445873	1.92505e+06	416558	1.03168e+06	2.25972e+06	123644	646626	923968	569687	415922	2.56006e+06	816699	1.149e+06	220460	1.18347e+06	5.90123e+06	1.26103e+06	487075	4.62747e+06	57865.5	623272	68995.2	381370	739561	2.20637e+06	49492.2	2.29816e+06	1.57813e+06	917855	862169	1.01395e+06	4.36868e+06	426172	2.20729e+06	544.34	544.34	544.34
0	LPC(22:6)+H	LPC(22:6)+H	LPC	(22:6)	(22:6)				568.34	C30 H51 O7 N1 P1	2.02315e+06	560891	233674	818884	68420.7	829395	1.20018e+06	297496	331011	645842	390277	601265	2.57215e+06	3.38812e+06	901230	234679	897329	5.46425e+06	496020	302966	3.59778e+06	0	336672	158729	214779	287385	1.81172e+06	54812	1.87495e+06	787960	401169	928293	518753	4.77496e+06	601512	2.37476e+06	568.34	568.34	568.34
0	LPE(16:0)-H	LPE(16:0)-H	LPE	(16:0)	(16:0)				452.278	C21 H43 O7 N1 P1	8.92363e+06	4.03225e+06	2.04312e+06	4.11336e+06	2.47962e+06	1.24647e+06	5.24088e+06	1.04107e+06	2.1367e+06	3.86849e+06	3.29429e+06	1.80501e+06	3.37757e+06	4.65322e+06	1.7018e+06	167460	2.97565e+06	8.10495e+06	3.14633e+06	1.4636e+06	8.84726e+06	317645	332381	367505	2.6991e+06	2.73203e+06	3.59702e+06	91913.7	7.12063e+06	2.45186e+06	4.32692e+06	954244	3.31427e+06	7.37015e+06	2.66375e+06	3.38384e+06	452.279	452.278	452.278
0	LPE(16:0p)-H	LPE(16:0p)-H	LPE	(16:0p)	(16:0p)				436.283	C21 H43 O6 N1 P1	4.32352e+06	1.61263e+06	1.09939e+06	2.24597e+06	993273	78409.7	5.37962e+06	210727	901150	1.57566e+06	1.53593e+06	251911	1.3793e+06	2.58012e+06	416288	0	1.50187e+06	4.39848e+06	1.74845e+06	629329	4.78242e+06	0	57247.3	67568.2	1.34276e+06	908912	1.27975e+06	0	4.25977e+06	1.19217e+06	2.46865e+06	48750.2	1.38248e+06	3.74719e+06	863084	1.31508e+06	436.283	436.283	436.283
0	LPE(18:0)-H	LPE(18:0)-H	LPE	(18:0)	(18:0)				480.31	C23 H47 O7 N1 P1	2.16592e+07	8.85171e+06	6.39432e+06	1.06747e+07	5.8975e+06	4.0087e+06	1.75602e+07	2.28515e+06	5.10009e+06	9.27491e+06	8.89845e+06	3.92712e+06	1.12029e+07	1.45255e+07	5.74716e+06	1.5357e+06	8.18517e+06	2.64168e+07	7.22129e+06	4.88509e+06	2.80927e+07	1.69653e+06	2.42063e+06	1.79621e+06	6.96693e+06	7.65938e+06	1.29585e+07	1.02397e+06	2.43668e+07	7.993e+06	1.29901e+07	2.44542e+06	1.01607e+07	2.37489e+07	5.23784e+06	1.10242e+07	480.31	480.31	480.31
0	LPE(18:0p)-H	LPE(18:0p)-H	LPE	(18:0p)	(18:0p)				464.315	C23 H47 O6 N1 P1	1.02997e+07	4.1717e+06	2.14878e+06	4.54359e+06	2.72655e+06	1.57464e+06	6.31377e+06	781714	1.82466e+06	2.84788e+06	3.16599e+06	1.14733e+06	2.66419e+06	5.14243e+06	1.60447e+06	80049.7	2.62116e+06	7.82776e+06	2.81921e+06	4311.24	8.31044e+06	595301	573438	229558	2.44884e+06	2.8189e+06	3.6715e+06	46907.9	1.01678e+07	2.59807e+06	4.94646e+06	347930	3.37993e+06	7.11659e+06	1.82686e+06	2.77814e+06	464.315	464.315	464.315
0	LPE(18:1)-H	LPE(18:1)-H	LPE	(18:1)	(18:1)				478.294	C23 H45 O7 N1 P1	3.36479e+07	2.08012e+07	5.94238e+06	1.20032e+07	7.26398e+06	6.8655e+06	1.06764e+07	5.98115e+06	6.05864e+06	1.3151e+07	1.24144e+07	1.16374e+07	1.51053e+07	1.8082e+07	6.15021e+06	3.42723e+06	1.62034e+07	1.42628e+07	8.11354e+06	3.79854e+06	1.66871e+07	4.11567e+06	1.22602e+06	1.42801e+06	1.21935e+07	1.82581e+07	1.24963e+07	3.70044e+06	1.75459e+07	1.10707e+07	1.06855e+07	1.49167e+06	6.94257e+06	1.98782e+07	5.07393e+06	7.18781e+06	478.294	478.294	478.294
0	LPE(18:1p)-H	LPE(18:1p)-H	LPE	(18:1p)	(18:1p)				462.299	C23 H45 O6 N1 P1	5.92094e+06	1.51189e+06	316366	2.08365e+06	1.36133e+06	73916.3	3.31449e+06	43796.1	337281	1.47836e+06	2.08283e+06	176658	948191	3.33139e+06	420912	0	748053	5.79095e+06	252879	45679.9	5.27042e+06	77401.4	0	39986.2	1.29777e+06	2.11564e+06	1.19563e+06	0	4.70637e+06	611033	2.56478e+06	62995.7	2.24442e+06	5.96294e+06	555210	1.27041e+06	462.3	462.299	462.299
0	LPE(20:1)-H	LPE(20:1)-H	LPE	(20:1)	(20:1)				506.325	C25 H49 O7 N1 P1	1.09545e+07	7.47019e+06	1.52888e+06	5594.67	2.41954e+06	2.13516e+06	2.3624e+06	1.82771e+06	1.23127e+06	3.80343e+06	4.04362e+06	4.45489e+06	5.05933e+06	6.89504e+06	2.22995e+06	2.45291e+06	4.93133e+06	1.05115e+07	2.53279e+06	2.28458e+06	3.90931e+06	1.86079e+06	552629	502688	4.37985e+06	7.39748e+06	3.70841e+06	1.11e+06	5.09322e+06	4.25424e+06	3.20209e+06	110119	1.95641e+06	6.97754e+06	1.20288e+06	3.81852e+06	506.325	506.325	506.325
0	LPE(20:3)-H	LPE(20:3)-H	LPE	(20:3)	(20:3)				502.294	C25 H45 O7 N1 P1	89998.4	0	0	0	0	0	0	0	0	0	68157.9	265177	242889	679.399	187150	239435	44337.6	1.29012e+06	0	0	550069	54632.8	0	0	1738.81	63339.1	836544	52665.8	59966.2	64107.3	0	0	53477.6	613264	0	427214	502.294
0	LPE(20:4)-H	LPE(20:4)-H	LPE	(20:4)	(20:4)				500.278	C25 H43 O7 N1 P1	4.38547e+06	3.38804e+06	5.79269e+06	3.54531e+06	1.69705e+06	3.51272e+06	3.40829e+06	1.42276e+06	3.70692e+06	4.15088e+06	2.74893e+06	8.04937e+06	1.12087e+07	3.15727e+06	6.30787e+06	4.92084e+06	4.85088e+06	2.16325e+07	3.29163e+06	4.02426e+06	1.10928e+07	2.08095e+06	2.52219e+06	2.39749e+06	3.35503e+06	3.18916e+06	1.56889e+07	1.58472e+06	3.89487e+06	1.87863e+06	2.51136e+06	3.29942e+06	2.48286e+06	1.08676e+07	4.5824e+06	7.15398e+06	500.279	500.279	500.279
0	LPE(22:4)-H	LPE(22:4)-H	LPE	(22:4)	(22:4)				528.31	C27 H47 O7 N1 P1	2.26171e+06	5.83045e+06	3.44199e+06	1.40564e+06	3.18355e+06	2.51846e+06	4.46442e+06	2.47272e+06	79127.9	4.33194e+06	5.31002e+06	4.81651e+06	5.56074e+06	1.8248e+06	3.3132e+06	2.87645e+06	3.15684e+06	1.27691e+07	3.67127e+06	2.80135e+06	5.22139e+06	928994	2.11875e+06	1.15947e+06	2.51735e+06	2.14744e+06	1.1336e+07	1.32104e+06	7.18547e+06	4.25084e+06	4.48423e+06	1.97878e+06	1.81535e+06	7.22275e+06	2.69574e+06	5.48929e+06	528.31	528.311	528.31
0	LPE(22:6)-H	LPE(22:6)-H	LPE	(22:6)	(22:6)				524.278	C27 H43 O7 N1 P1	9.51783e+06	5.82128e+06	2.62148e+06	6.34548e+06	1.99462e+06	7.8803e+06	5.56722e+06	2.71992e+06	6.0997e+06	8.692e+06	5.12896e+06	1.41231e+07	1.95445e+07	6.8814e+06	1.30109e+07	9.72773e+06	8.10278e+06	3.95223e+07	4531196	4.38017e+06	2.08339e+07	3.61727e+06	6.78701e+06	4.24072e+06	5.36745e+06	4.54253e+06	3.57856e+07	3.87119e+06	7.40122e+06	4.55394e+06	5.36627e+06	8.0743e+06	8.9793e+06	2.46365e+07	4.51555e+06	1.95815e+07	524.279	524.279	524.279
0	LPE(22:6)+H	LPE(22:6)+H	LPE	(22:6)	(22:6)				526.293	C27 H45 O7 N1 P1	1.3728e+07	7.86411e+06	6.47035e+06	1.10755e+07	3.25511e+06	1.27261e+07	8.46774e+06	4.33567e+06	8.76338e+06	1.47035e+07	6.21713e+06	2.09891e+07	2.6903e+07	1.02312e+07	1.45024e+07	1.12833e+07	1.12313e+07	5.4752e+07	7.68499e+06	8.21931e+06	3.0348e+07	5.96421e+06	8.59637e+06	7.09282e+06	8.00486e+06	2.5247e+07	4.44423e+07	5.08791e+06	1.31801e+07	6.36504e+06	5.99536e+06	1.07055e+07	7.61774e+06	3.41101e+07	4.6472e+06	2.78643e+07	526.293	526.293	526.293
0	LPI(18:0)-H	LPI(18:0)-H	LPI	(18:0)	(18:0)				599.32	C27 H52 O12 N0 P1	1.09284e+06	0	43121.3	389385	48376.2	1.54395e+06	550006	0	148674	299109	682862	108050	3.06401e+06	297857	829811	84214	530513	3.5383e+06	529648	47319.6	3.42852e+06	0	373604	1171.55	52972.8	0	1.86578e+06	0	994823	176858	126576	49372.6	796701	2.8536e+06	0	1.63221e+06	599.32		599.32
0	LPS(18:0)-H	LPS(18:0)-H	LPS	(18:0)	(18:0)				524.299	C24 H47 O9 N1 P1	3.1407e+06	1.38817e+06	767417	1.37135e+06	1.62909e+06	50662.2	2.9181e+06	203816	430025	1.17266e+06	2.76754e+06	40802	1.21395e+06	1.84359e+06	250413	0	809364	51435	1.21313e+06	98561.2	1.61445e+06	52889.6	0	0	352582	197215	560008	0	3.81247e+06	705737	2.56059e+06	83141.9	1.30647e+06	1.44872e+06	1.12493e+06	314984	524.299	524.299	524.299
0	LPS(18:0)+H	LPS(18:0)+H	LPS	(18:0)	(18:0)				526.314	C24 H49 O9 N1 P1	4.27575e+06	1.30327e+06	601592	1.04917e+06	2.39225e+06	148113	2.71068e+06	163871	619802	1.32053e+06	3.36658e+06	126859	1.48519e+06	1.9467e+06	335796	0	1.04971e+06	363811	1.15106e+06	184935	2.45379e+06	0	0	40729.7	238996	248534	962581	0	4.31045e+06	803638	2.22989e+06	49158.2	948518	1.34577e+06	1.0635e+06	277491	526.314	526.314	526.314
0	MGDG(16:0/16:0)+HCOO	MGDG(32:0)+HCOO	MGDG	(16:0/16:0)	(16:0)	(16:0)			775.558	C42 H79 O12	2.77042e+06	1.08324e+06	122032	913479	304450	1.86516e+06	1.57393e+06	237145	3.42023e+07	897190	400380	480727	3.64231e+06	4.31879e+06	1.48769e+06	431461	3.04308e+06	1.07721e+07	885015	940746	6.51157e+06	852472	233922	1.18086e+06	1.59025e+06	1.85704e+06	3.41065e+06	5.6945e+06	2.25483e+06	2.31568e+06	931775	606769	2.24998e+06	5.67851e+06	84723.7	2.23169e+06	775.558	775.558	775.558
0	MGDG(16:0/18:0)+HCOO	MGDG(34:0)+HCOO	MGDG	(16:0/18:0)	(16:0)	(18:0)			803.589	C44 H83 O12	2.67597e+06	1.67153e+06	89891.7	1.60658e+06	547745	1.36838e+06	1.98899e+06	235700	486834	1.30209e+06	704032	2.23099e+06	4.29022e+06	3.47877e+06	482686	809991	3.18308e+06	9.63785e+06	590501	855307	8.66203e+06	1.5934e+06	414299	937015	2.30365e+06	3.33679e+06	3.13496e+06	0	2.62608e+06	1.56622e+06	1.59782e+06	561009	3.09016e+06	1.02391e+07	238918	3.5279e+06	803.59	803.591	803.589
0	MGDG(16:0/18:1)+HCOO	MGDG(34:1)+HCOO	MGDG	(16:0/18:1)	(16:0)	(18:1)			801.573	C44 H81 O12	2.80119e+06	768797	103121	845957	245022	356946	2.60048e+06	377410	132270	2.84115e+06	922259	2.51372e+06	5.4596e+06	4.9232e+06	2.17704e+06	1.05453e+06	3.63527e+06	1.38785e+07	1.19841e+06	1.44513e+06	1.06092e+07	2.90884e+06	620072	1.00298e+06	2.50911e+06	2.98259e+06	3.74778e+06	2676.31	4.14043e+06	544168	782493	309299	2.49813e+06	8.27952e+06	0	2.31607e+06	801.573	801.573	801.573
0	MGDG(16:0/20:1)+HCOO	MGDG(36:1)+HCOO	MGDG	(16:0/20:1)	(16:0)	(20:1)			829.605	C46 H85 O12	613414	104524	117893	176293	0	171749	411713	0	2325.63	128702	244305	455943	2.28282e+06	2.78654e+06	1.3714e+06	102246	491091	6.54075e+06	2771.48	230657	3.48655e+06	530896	0	2243.79	426975	411429	3.05672e+06	0	217600	0	485507	0	665405	3.3383e+06	0	700638	829.605	829.605	829.605
0	MePC(35:6)+NH4	MePC(35:6)+NH4	MePC	(35:6)	(35:6)				795.565	C44 H80 O8 N2 P1	2.67289e+07	1.01588e+07	5.13971e+06	1.37534e+07	2.77503e+06	8.39305e+06	2.30604e+07	3.02979e+06	9.89326e+06	1.88965e+07	4.80032e+06	1.17673e+07	2.82136e+07	2.23259e+07	1.42109e+07	2.89369e+06	1.59843e+07	6.34431e+07	1.07592e+07	7.45422e+06	5.47383e+07	2.51517e+06	5.38374e+06	3.35899e+06	1.22995e+07	9.54694e+06	3.24186e+07	897311	2.63346e+07	1.09212e+07	9.13719e+06	3.88447e+06	2.14854e+07	5.56888e+07	3.69877e+06	2.7841e+07	795.565	795.565	795.565
0	MePC(36:0)+NH4	MePC(36:0)+NH4	MePC	(36:0)	(36:0)				821.674	C45 H94 O8 N2 P1	2.28408e+07	1.6726e+07	6.85494e+06	1.88968e+07	5.6905e+06	1.24631e+07	2.33016e+07	4.49006e+06	1.44771e+07	1.69048e+07	9.45624e+06	1.56292e+07	2.82979e+07	2.10062e+07	2.25279e+07	4.98211e+06	1.74186e+07	3.94333e+07	1.4933e+07	1.41983e+07	3.52956e+07	2.66156e+06	7.79645e+06	7.31072e+06	1.6737e+07	1.34396e+07	2.58528e+07	2.07634e+06	2.39391e+07	1.37193e+07	7.93424e+06	8.23876e+06	2.67208e+07	3.15066e+07	6.67495e+06	2.80953e+07	821.674	821.674	821.675
0	MePC(37:0)+NH4	MePC(37:0)+NH4	MePC	(37:0)	(37:0)				835.69	C46 H96 O8 N2 P1	1.04427e+07	6.44509e+06	2.1e+06	8.22219e+06	1.6854e+06	4.76706e+06	6.43105e+06	1.92473e+06	3.93198e+06	8.53561e+06	3.40415e+06	2.62814e+06	1.11895e+07	8.72731e+06	6.43012e+06	759695	6.25873e+06	7.89665e+06	7.74417e+06	3.35785e+06	1.30277e+07	1.37642e+06	3.93515e+06	2.52171e+06	4.00114e+06	5.00318e+06	1.48659e+07	224408	1.11311e+07	5.38921e+06	8.37702e+06	2.68993e+06	2.34078e+06	5.54984e+06	2.6827e+06	7.95684e+06	835.689	835.69	835.69
0	MePC(38:0)+NH4	MePC(38:0)+NH4	MePC	(38:0)	(38:0)				849.706	C47 H98 O8 N2 P1	6.17509e+06	2.93703e+06	1.08589e+06	3.48801e+06	789737	2.20229e+06	5.76238e+06	110445	1.95846e+06	2.31205e+06	1.02598e+06	2.59787e+06	7.20491e+06	4.28833e+06	5.12022e+06	877095	4.07989e+06	1.86325e+07	1.91874e+06	2.27037e+06	1.62786e+07	310363	1.16096e+06	1.25212e+06	3.55169e+06	2.16918e+06	7.25717e+06	0	7.26052e+06	1.95972e+06	2.92312e+06	945306	6.41836e+06	1.54306e+07	1.1656e+06	7.07785e+06	849.705	849.706	849.706
0	MePC(38:1)+NH4	MePC(38:1)+NH4	MePC	(38:1)	(38:1)				847.69	C47 H96 O8 N2 P1	4.74413e+07	3.1327e+07	1.57136e+07	3.71498e+07	1.16126e+07	2.22551e+07	4.51008e+07	8.61312e+06	2.57875e+07	3.51184e+07	1.76551e+07	2.90359e+07	4.10549e+07	3.74631e+07	3.05904e+07	9.31062e+06	3.01766e+07	2.50018e+07	7.09308e+06	2.05649e+07	3.84953e+07	7.44408e+06	1.38724e+07	1.154e+07	3.21399e+07	3.43092e+07	4.00523e+07	3.79387e+06	2.97839e+07	2.69575e+07	2.44751e+07	1.36145e+07	4.00472e+07	3.92512e+07	1.01668e+07	4.0017e+07	847.69	847.69	847.692
0	MePC(38:6)+NH4	MePC(38:6)+NH4	MePC	(38:6)	(38:6)				837.612	C47 H86 O8 N2 P1	1.20917e+07	3.46903e+06	1.48541e+06	4.14678e+06	678734	2.77396e+06	7.13087e+06	312753	1.02288e+06	4.30853e+06	1.68583e+06	4.33187e+06	1.01732e+07	2.55132e+06	3.08659e+06	429812	6.54495e+06	1.96513e+07	2.84212e+06	839717	1.56548e+07	534830	1.14651e+06	1.35207e+06	4.85087e+06	4.11137e+06	6.15076e+06	139794	7.65541e+06	3.12568e+06	2.28676e+06	1.10142e+06	6.85724e+06	1.78984e+07	646951	7.35124e+06	837.616	837.612	837.612
0	MePC(38:8)+NH4	MePC(38:8)+NH4	MePC	(38:8)	(38:8)				833.58	C47 H82 O8 N2 P1	3.61659e+06	3.70672e+06	2.73049e+06	2.63222e+06	2.13055e+06	4.57876e+06	1.48065e+06	2.76432e+06	6.08657e+06	3.13825e+06	3.27915e+06	2.94738e+06	3.61262e+06	12192.6	6.10415e+06	2.55503e+06	5.27831e+06	0	1.86211e+06	591596	1.26186e+06	1.49867e+06	3.69214e+06	1.64138e+06	1.9605e+06	4.13826e+06	2.26272e+06	634117	5.43935e+06	1.94974e+06	5.43854e+06	2.71005e+06	2.93066e+06	20855.4	2.78069e+06	3.76116e+06	833.58	833.58	833.58
0	MePC(39:0)+NH4	MePC(39:0)+NH4	MePC	(39:0)	(39:0)				863.721	C48 H100 O8 N2 P1	1.30231e+06	971089	4446.54	1.91067e+06	138798	245641	1.46194e+06	0	163813	1.14526e+06	2694.44	951136	4.16398e+06	1.69035e+06	954034	0	1.47477e+06	7.36569e+06	4498.85	282571	20899	148991	3474.54	2270.52	3862.09	4465.62	2.74573e+06	0	2.48581e+06	366205	1.0068e+06	2715.34	50391.9	9.15257e+06	302530	2.8096e+06	863.721	863.721	863.721
0	MePC(39:1)+NH4	MePC(39:1)+NH4	MePC	(39:1)	(39:1)				861.706	C48 H98 O8 N2 P1	4.00621e+06	1.47095e+07	4.91066e+06	1.36944e+07	2.91709e+06	9.67457e+06	1.63921e+07	2.13464e+06	7.75713e+06	3.95951e+06	7.01899e+06	7.73208e+06	7.43715e+06	8.04113e+06	7.91397e+06	3.18858e+06	9.20996e+06	1.63234e+06	3.48941e+06	5.74432e+06	6.16614e+06	1.60615e+06	6.48187e+06	2.03925e+06	1.48891e+07	1.05898e+07	1.90009e+07	1.15255e+06	1.6771e+07	7.16012e+06	4.9163e+06	3.43266e+06	1.12538e+07	7.2907e+06	4.84076e+06	4.49466e+06	861.708	861.705	861.705
0	MePC(40:1)+NH4	MePC(40:1)+NH4	MePC	(40:1)	(40:1)				875.721	C49 H100 O8 N2 P1	1.58662e+07	7.05569e+06	2.65791e+06	9.27925e+06	1.46598e+06	6.30854e+06	1.01025e+07	1.24046e+06	4.14353e+06	8.84199e+06	3.61094e+06	9.41149e+06	2.13727e+07	1.7298e+07	1.05495e+07	2.63904e+06	1.06138e+07	4.85417e+07	6.27411e+06	6.23676e+06	3.98956e+07	3.85472e+06	2.44755e+06	2.96515e+06	9.51293e+06	1.14895e+07	1.98995e+07	997312	1.63266e+07	7.40099e+06	5.59807e+06	2.91662e+06	1.69552e+07	4.41618e+07	1.82916e+06	1.68752e+07	875.721	875.721	875.721
0	MePC(40:3)+NH4	MePC(40:3)+NH4	MePC	(40:3)	(40:3)				871.69	C49 H96 O8 N2 P1	358164	0	0	5444.66	0	0	139613	0	0	0	0	0	928399	274545	0	0	0	1.84404e+06	0	0	2.89008e+06	0	0	0	201463	0	340697	0	976917	243782	0	0	0	3.57627e+06	0	273747	871.69
0	MePC(40:4)+NH4	MePC(40:4)+NH4	MePC	(40:4)	(40:4)				869.674	C49 H94 O8 N2 P1	6.7418e+06	2.36012e+06	1.21977e+06	4.98731e+06	788490	2.70181e+06	5.30144e+06	557511	1.70447e+06	5.3819e+06	1.41709e+06	2.8198e+06	8.22022e+06	7.0932e+06	3.15015e+06	486775	4.75626e+06	1.67072e+07	3.30422e+06	2.74429e+06	1.66281e+07	442310	1.04261e+06	698434	3.3394e+06	3.33888e+06	1.11398e+07	0	8.04346e+06	4.17298e+06	2.65425e+06	1.22963e+06	5.41167e+06	1.46691e+07	632436	7.22476e+06	869.675	869.674	869.674
0	MePC(41:1)+NH4	MePC(41:1)+NH4	MePC	(41:1)	(41:1)				889.737	C50 H102 O8 N2 P1	7.368e+06	274969	574162	3.23038e+06	786202	928173	3.75581e+06	221483	935606	1.14835e+06	616905	2.28906e+06	4.48459e+06	2.33221e+06	1.09824e+06	1.16497e+06	2.71379e+06	1.13674e+07	1.40443e+06	1.74134e+06	4.88447e+06	779948	639596	676346	3.70994e+06	3.81625e+06	3.2291e+06	167342	3.91682e+06	2.45251e+06	3.03776e+06	923573	6.41866e+06	1.2954e+07	351453	4.95462e+06	889.737	889.737	889.737
0	MePC(41:4)+NH4	MePC(41:4)+NH4	MePC	(41:4)	(41:4)				883.69	C50 H96 O8 N2 P1	1.11234e+06	251860	415376	1.25141e+06	0	672942	957067	0	590563	1.79543e+06	271439	1.03334e+06	2.2971e+06	354374	858138	0	662620	1.44813e+06	0	552102	2.96411e+06	0	1748.3	0	362485	544865	2.02994e+06	0	1.95634e+06	631041	999970	0	1.57212e+06	3.78569e+06	281856	659648	883.69	883.69	883.69
0	MePC(42:5)+NH4	MePC(42:5)+NH4	MePC	(42:5)	(42:5)				895.69	C51 H96 O8 N2 P1	14346.4	293739	0	337323	0	0	338426	0	206597	428960	136762	233701	762985	8109.58	214788	0	426262	11709.1	0	1311.2	2.88051e+06	0	0	0	336490	234028	522677	0	1.12874e+06	187532	163779	0	1.13648e+06	2.39354e+06	141899	1.14144e+06	895.69	895.69
0	MePC(42:6)+NH4	MePC(42:6)+NH4	MePC	(42:6)	(42:6)				893.674	C51 H94 O8 N2 P1	638909	1.51931e+06	391019	1.61376e+06	82565.4	636574	2.12287e+06	81612	849681	1.38175e+06	267245	1.47943e+06	3.96926e+06	3.54863e+06	1.48389e+06	99485.9	2.35871e+06	1.36754e+07	781558	527636	3.12336e+06	135721	92243	261189	1.25758e+06	290361	4.00428e+06	0	2.91623e+06	660207	977190	244914	2.87002e+06	1.26158e+07	429699	4.00408e+06	893.672	893.674	893.674
0	MePC(43:6)+NH4	MePC(43:6)+NH4	MePC	(43:6)	(43:6)				907.69	C52 H96 O8 N2 P1	104683	3822.98	0	456060	142778	181561	826726	0	225179	192480	1316.94	0	1.17357e+06	493976	2667.69	0	1181.51	2.37489e+06	138363	128085	1.756e+06	0	0	0	2152.29	268954	556867	0	2799.09	1310.85	282672	0	457532	3.42048e+06	0	601771	907.69	907.69
0	MePC(44:4)+NH4	MePC(44:4)+NH4	MePC	(44:4)	(44:4)				925.737	C53 H102 O8 N2 P1	257265	0	0	0	0	0	29113.7	0	0	0	0	0	539467	0	74686.6	0	0	536947	0	0	2.07556e+06	0	0	0	267020	285943	546533	0	231067	0	0	0	434837	1.48025e+06	0	117777	925.737
0	MePC(44:6)+NH4	MePC(44:6)+NH4	MePC	(44:6)	(44:6)				921.706	C53 H98 O8 N2 P1	3.27621e+06	479899	0	1.63464e+06	0	405112	1.3332e+06	104826	595073	1.56875e+06	175483	816700	3.69611e+06	2.14914e+06	1.07569e+06	158188	1.91769e+06	1.17074e+07	637699	584471	9.1435e+06	0	2003.69	0	1.05763e+06	1.05254e+06	3.56651e+06	0	2.28711e+06	738705	509234	4262.97	2.72239e+06	8.67502e+06	180772	2.05073e+06	921.705	921.706
0	MePC(45:6)+NH4	MePC(45:6)+NH4	MePC	(45:6)	(45:6)				935.721	C54 H100 O8 N2 P1	511942	159373	0	272234	0	2226.08	647502	0	0	448162	98294.8	148858	894032	337728	281198	0	377640	1.81551e+06	0	0	3.75324e+06	0	0	87758.8	264751	109859	294360	0	343561	0	196420	0	254679	2.11121e+06	0	768703	935.721	935.721
0	PA(18:0/16:0)-H	PA(34:0)-H	PA	(18:0/16:0)	(18:0)	(16:0)			675.497	C37 H72 O8 N0 P1	952413	1.33753e+06	1.41399e+06	1.21455e+06	698635	2509.8	736604	1.10486e+06	801166	1.35607e+06	2.4602e+06	1.84096e+06	536077	542850	643582	1.01924e+06	1.48735e+06	147392	815321	1.23311e+06	191604	1.25732e+06	257647	1.20547e+06	1.1476e+06	770763	982166	591172	1.71291e+06	1.48676e+06	1.82208e+06	97700.6	1.48617e+06	992719	1.62164e+06	1.34034e+06	675.497	675.497	675.497
0	PA(16:0/18:1)-H	PA(34:1)-H	PA	(16:0/18:1)	(16:0)	(18:1)			673.481	C37 H70 O8 N0 P1	6.24561e+06	2.27754e+06	493348	2.00008e+06	1.15388e+06	6.43974e+06	517842	792047	1.08616e+06	3.56369e+06	1.28816e+06	4.06118e+06	9.5891e+06	7.57553e+06	4.45916e+06	3.8309e+06	7.2444e+06	2.80849e+07	5.2227e+06	1.89068e+06	2.13536e+07	1.37366e+06	1.65307e+06	3.61435e+06	5.18278e+06	6.15146e+06	5.61913e+06	859880	1.48605e+06	4.12687e+06	1.31406e+06	2.73997e+06	7.21657e+06	2.17292e+07	185518	7.44187e+06	673.482	673.481	673.481
0	PA(18:0/18:0)-H	PA(36:0)-H	PA	(18:0/18:0)	(18:0)	(18:0)			703.528	C39 H76 O8 N0 P1	6.07263e+06	6.29519e+06	6.7976e+06	7.8835e+06	3.88509e+06	738963	5.81436e+06	5.04423e+06	3.44434e+06	6.99274e+06	6.48361e+06	6.95349e+06	4.68241e+06	4.31111e+06	5.19681e+06	4.06798e+06	8.73042e+06	7.21206e+06	3.91894e+06	5.09974e+06	7787419	5.70868e+06	2.61695e+06	3.80419e+06	4.57951e+06	5.05761e+06	5.94993e+06	2.72054e+06	8.20224e+06	5.75461e+06	7.648e+06	3.80857e+06	6.80636e+06	6.85452e+06	7.56789e+06	9.36278e+06	703.528	703.528	703.528
0	PA(18:0/18:1)-H	PA(36:1)-H	PA	(18:0/18:1)	(18:0)	(18:1)			701.513	C39 H74 O8 N0 P1	5.41495e+06	1.89805e+06	605804	3.1973e+06	1.22452e+06	3.62031e+06	2.19272e+06	410325	2.64637e+06	1.31225e+06	1.53732e+06	5.70558e+06	1.1551e+07	8.06839e+06	9.28454e+06	5.46315e+06	4.18075e+06	2.87037e+07	5.57175e+06	3.0318e+06	1.91889e+07	1.32309e+06	2.4081e+06	2.32076e+06	9.69071e+06	5.19412e+06	6.46914e+06	1.64747e+06	7.52521e+06	4.37541e+06	2.11527e+06	4.91383e+06	4.61047e+06	2.15281e+07	520093	9.45664e+06	701.513	701.512	701.513
0	PA(18:1/18:1)-H	PA(36:2)-H	PA	(18:1/18:1)	(18:1)	(18:1)			699.497	C39 H72 O8 N0 P1	1.69458e+06	259396	0	131861	89959.1	142104	0	0	0	265634	2139.14	2813.51	461241	271713	98842.3	126529	570705	2.34181e+06	608919	187959	2.80358e+06	0	5262.27	148952	235359	406806	312085	0	431012	234536	0	833855	180669	2.72621e+06	0	230438	699.497	699.497
0	PA(18:0/20:0)-H	PA(38:0)-H	PA	(18:0/20:0)	(18:0)	(20:0)			731.56	C41 H80 O8 N0 P1	3.09152e+06	2.44651e+06	4.17623e+06	1.31075e+06	1.40803e+06	204676	1.08985e+06	1.05908e+06	1.68339e+06	1.46069e+06	3.06041e+06	1.81496e+06	3.28415e+06	1.01767e+06	1.95215e+06	4.29671e+06	1.39054e+06	4.59063e+06	2.81368e+06	908266	5.39918e+06	3.48592e+06	929706	757014	959145	1.03581e+06	1.58057e+06	710637	3.51143e+06	1.14739e+06	5.59818e+06	550761	4.93813e+06	2.77223e+06	4.52807e+06	2.42846e+06	731.56	731.56	731.56
0	PA(18:0/20:4)-H	PA(38:4)-H	PA	(18:0/20:4)	(18:0)	(20:4)			723.497	C41 H72 O8 N0 P1	924965	593765	0	585980	0	1.0728e+06	0	253922	167761	1.23138e+06	135893	1.11787e+06	1.73826e+06	1.22408e+06	2.00226e+06	1.19674e+06	1.70917e+06	9.17575e+06	1.0771e+06	461672	8.52743e+06	334325	663683	779266	1.49278e+06	1.15713e+06	1.03732e+06	0	593283	244502	141965	195384	1.01692e+06	3.79414e+06	0	1.68521e+06	723.497	723.497
0	PA(24:2/20:4)-H	PA(44:6)-H	PA	(24:2/20:4)	(24:2)	(20:4)			803.56	C47 H80 O8 N0 P1	7.60602e+06	3.77571e+06	1.31865e+06	4.75168e+06	1.24309e+06	3.47979e+06	5.1522e+06	1.62497e+06	3.26541e+06	5.54355e+06	2.11504e+06	3.57634e+06	6.31463e+06	5.13623e+06	5.08065e+06	1.54209e+06	4.77946e+06	1.54811e+07	3.20666e+06	3.27775e+06	1.20288e+07	1.88149e+06	1.94131e+06	1.92337e+06	3.86594e+06	4.11784e+06	6.99088e+06	401729	7.66533e+06	4.36239e+06	3.84919e+06	1.73835e+06	4.96051e+06	7.84998e+06	1.03893e+06	3.28106e+06	803.56	803.56	803.56
0	PC(16:0/14:0)+HCOO	PC(30:0)+HCOO	PC	(16:0/14:0)	(16:0)	(14:0)			750.529	C39 H77 O10 N1 P1	6.77259e+06	3.07417e+06	1.3408e+06	4.72496e+06	954725	2.92715e+06	7.65501e+06	1.6793e+06	2.89174e+06	5.6028e+06	2.72404e+06	4.64885e+06	1.0508e+07	7.90324e+06	5.08077e+06	1.65417e+06	5.6572e+06	2.22304e+07	3.71439e+06	3.32379e+06	1.99901e+07	1.89449e+06	2.35819e+06	1.56773e+06	3.51401e+06	3.95952e+06	7.38729e+06	225007	5.22658e+06	3.23252e+06	2.33513e+06	1.51431e+06	8.11387e+06	1.97062e+07	1.37967e+06	8.12658e+06	750.529	750.53	750.53
0	PC(30:0)+H	PC(30:0)+H	PC	(16:0/14:0)	(16:0)	(14:0)			706.538	C38 H77 O8 N1 P1	9.92397e+07	4.50517e+07	1.52766e+07	6.04961e+07	1.12207e+07	3.66569e+07	1.06924e+08	1.54852e+07	4.17188e+07	8.06645e+07	23843.7	6.03548e+07	1.60822e+08	1.28852e+08	6.68168e+07	1.82031e+07	9.08127e+07	4.21508e+08	4.4626e+07	4.18654e+07	3.38779e+08	1.70235e+07	2.191e+07	1.97237e+07	5.58901e+07	5.85265e+07	1.28786e+08	4.58367e+06	1.05919e+08	4.05915e+07	3.4643e+07	1.77819e+07	1.29991e+08	3.61275e+08	1.72112e+07	1.33099e+08	706.538	706.538	706.539
0	PC(30:0e)+H	PC(30:0e)+H	PC	(30:0e)	(30:0e)				692.559	C38 H79 O7 N1 P1	1.1278e+06	415085	0	508287	70574.9	0	748987	0	444405	522160	107523	146672	1.58466e+06	1.13088e+06	203534	0	752987	5.45075e+06	144323	4519.01	3.23114e+06	0	0	0	281098	565531	1.24818e+06	0	1.16321e+06	161320	432616	0	939877	4.72736e+06	0	779257	692.559	692.559
0	PC(15:0/16:0)+HCOO	PC(31:0)+HCOO	PC	(15:0/16:0)	(15:0)	(16:0)			764.545	C40 H79 O10 N1 P1	3.06653e+06	1.18403e+06	188356	1.20847e+06	197365	707273	2.02312e+06	0	1.40834e+06	1.89443e+06	691383	818829	3.12941e+06	1.96851e+06	1.38527e+06	1406.19	1.862e+06	6.39224e+06	1.27324e+06	571345	4.87436e+06	62863.8	485602	739427	1.06881e+06	1.50056e+06	2.36488e+06	0	2.18508e+06	511707	1.05394e+06	0	2.39369e+06	4.89751e+06	513132	2.20467e+06	764.547	764.549	764.545
0	PC(31:0)+H	PC(31:0)+H	PC	(15:0/16:0)	(15:0)	(16:0)			720.554	C39 H79 O8 N1 P1	2.37359e+07	1.12802e+07	4.25038e+06	1.30212e+07	2.43714e+06	7.40962e+06	1.81384e+07	3.26915e+06	1.07492e+07	1.78492e+07	6.22122e+06	9.41779e+06	2.6567e+07	1.83739e+07	1.22109e+07	3.54939e+06	1.57782e+07	9.24426e+07	9.03295e+06	8.93455e+06	7.08864e+07	3.19143e+06	5.62233e+06	4.9276e+06	1.03073e+07	9.65291e+06	2.18702e+07	285127	2.07959e+07	9.26168e+06	8.38907e+06	5338757	1.75489e+07	6.30781e+07	4.20363e+06	1.93427e+07	720.554	720.554	720.554
0	PC(16:0/16:0)+HCOO	PC(32:0)+HCOO	PC	(16:0/16:0)	(16:0)	(16:0)			778.56	C41 H81 O10 N1 P1	4.80793e+08	2.47715e+08	1.3622e+08	3.35365e+08	1.06194e+08	2.08361e+08	4.41289e+08	9.73166e+07	2.24523e+08	3.31451e+08	1.72477e+08	2.55139e+08	5.41236e+08	3.97589e+08	3.40655e+08	1.01602e+08	3.55388e+08	1.00317e+09	2.454e+08	2.12472e+08	9.57656e+08	6.698e+07	1.50561e+08	1.1524e+08	3.11407e+08	2.57999e+08	5.51669e+08	3.92559e+07	4.84182e+08	2.35014e+08	2.52727e+08	1.6333e+08	4.72938e+08	9.05713e+08	1.42786e+08	5.18738e+08	778.563	778.561	778.562
0	PC(32:0)+H	PC(32:0)+H	PC	(16:0/16:0)	(16:0)	(16:0)			734.569	C40 H81 O8 N1 P1	4.53715e+09	2.3181e+09	1.12017e+09	3.30958e+09	8.81485e+08	1.89373e+09	4.2814e+09	7.53587e+08	2.0717e+09	3.25114e+09	1.38557e+09	2.3032e+09	5.34287e+09	4.05322e+09	3.19048e+09	8.37752e+08	3.34967e+09	9.33424e+09	2.25098e+09	1.94613e+09	8.77313e+09	5.75078e+08	1.17668e+09	9.81819e+08	1.36531e+06	2.49959e+09	5.35998e+09	2.37748e+08	4.78409e+09	2.13402e+09	2.29362e+09	1.26132e+09	4.5579e+09	8.52969e+09	1.11155e+09	4.96366e+09	734.569	734.569	734.57
0	PC(16:0e/16:0)+HCOO	PC(32:0e)+HCOO	PC	(16:0e/16:0)	(16:0e)	(16:0)			764.581	C41 H83 O9 N1 P1	3.83008e+06	2.40767e+06	788624	2.96178e+06	610788	1.55209e+06	4.09798e+06	891963	2.51289e+06	3.37819e+06	967156	1.90646e+06	5.0609e+06	4.21559e+06	3.1252e+06	595808	3.65238e+06	1.34432e+07	2.15621e+06	1.79403e+06	1.17039e+07	426133	746823	686790	2.83658e+06	2.34932e+06	5.06999e+06	0	3.8214e+06	1.80569e+06	1.96074e+06	850883	4.58553e+06	1.04025e+07	969564	4.75143e+06	764.581	764.582	764.581
0	PC(32:0e)+H	PC(32:0e)+H	PC	(16:0e/16:0)	(16:0e)	(16:0)			720.59	C40 H83 O7 N1 P1	4.26253e+07	2.16141e+07	6.78945e+06	2.44119e+07	5.81433e+06	1.48285e+07	3.38378e+07	6.02242e+06	1.31246e+07	2.21986e+07	1.09703e+07	1.98307e+07	5.62241e+07	4.14376e+07	2.30698e+07	6.05959e+06	2.85407e+07	2.10871e+08	1.64403e+07	1.45184e+07	1.68412e+08	4.89305e+06	7.68407e+06	7.96068e+06	2.12098e+07	2.3747e+07	5.44493e+07	1.50098e+06	4.06413e+07	1.64277e+07	1.69229e+07	9.18588e+06	3.85119e+07	1.6348e+08	6.14424e+06	4.36506e+07	720.59	720.59	720.59
0	PC(16:0p/16:0)+HCOO	PC(32:0p)+HCOO	PC	(16:0p/16:0)	(16:0p)	(16:0)			762.565	C41 H81 O9 N1 P1	3.35063e+06	1.63373e+06	449344	2.52671e+06	108649	1.17815e+06	3.77957e+06	441084	1.57185e+06	2.12433e+06	849984	1.69296e+06	5.01854e+06	2.94342e+06	2.33829e+06	487967	2.56711e+06	1.00108e+07	1.88861e+06	903327	1.0491e+07	4023.49	927446	608977	1.79324e+06	2.02715e+06	4.17575e+06	0	3.45449e+06	1.57677e+06	1.60569e+06	561842	3.63747e+06	8.13041e+06	416292	3.24404e+06	762.565	762.566	762.565
0	PC(16:0/16:1)+HCOO	PC(32:1)+HCOO	PC	(16:0/16:1)	(16:0)	(16:1)			776.545	C41 H79 O10 N1 P1	2.82026e+07	1.05211e+07	3.67599e+06	2.12251e+07	4.03194e+06	8.92182e+06	1.85234e+07	4.32944e+06	7.44621e+06	1.25609e+07	6.01075e+06	1.01647e+07	3.37399e+07	2.86725e+07	1.00113e+07	2.76771e+06	1.37257e+07	6.08235e+07	8.58236e+06	7.08593e+06	6.17052e+07	4.33191e+06	4.04044e+06	4.37761e+06	1.4615e+07	1.29334e+07	2.01176e+07	1.40703e+06	1.89803e+07	9.74871e+06	7.47905e+06	3.74825e+06	2.47552e+07	5.15631e+07	4.10521e+06	2.6379e+07	776.546	776.546	776.546
0	PC(32:1)+H	PC(32:1)+H	PC	(16:0/16:1)	(16:0)	(16:1)			732.554	C40 H79 O8 N1 P1	4.85717e+08	2.10664e+08	7.90893e+07	3.0902e+08	5.55886e+07	1.59409e+08	4.30262e+08	6.54102e+07	1.63356e+06	2.79006e+08	1.22656e+08	2.3063e+08	6.09013e+08	5.30155e+08	2.29516e+08	5.92063e+07	3.33153e+08	1.20708e+09	1.67311e+08	1.6397e+08	1.22482e+09	7.13192e+07	7.16643e+07	7.88384e+07	2.63062e+08	2.97989e+08	4.84974e+08	1.83769e+07	4.96325e+08	2.04479e+08	1.5957e+08	6.86264e+07	4.83314e+08	1.32255e+09	6.53841e+07	4.73102e+08	732.554	732.553	732.554
0	PC(32:1e)+H	PC(32:1e)+H	PC	(32:1e)	(32:1e)				718.575	C40 H81 O7 N1 P1	1551745	1.08343e+06	120158	2.25972e+06	82749.1	571013	880976	0	0	1.56936e+06	325984	282652	2.12402e+06	2.50692e+06	699119	110410	1.20057e+06	1.11485e+07	531756	100045	1.1556e+07	113058	0	0	1.39337e+06	1.75947e+06	2.33006e+06	0	1.21011e+06	407671	349369	213555	1.55272e+06	1.22069e+07	0	2.32029e+06	718.575	718.575	718.575
1	PC(32:1e)+H	PC(32:1e)+H	PC	(32:1e)	(32:1e)				718.575	C40 H81 O7 N1 P1	2.97913e+07	1.14819e+07	4.50667e+06	1.53684e+07	3.4157e+06	9.16025e+06	2.40725e+07	3.38712e+06	9.79076e+06	1.66518e+07	6.29119e+06	1.27731e+07	4.06787e+07	2.45505e+07	1.78248e+07	4.12794e+06	1.93921e+07	1.40113e+08	1.16321e+07	8.3312e+06	1.19363e+08	2.53407e+06	6.11026e+06	4.82518e+06	1.50578e+07	1.2561e+07	3.38529e+07	981821	2.65312e+07	9.41269e+06	1.02663e+07	5.96221e+06	2.57758e+07	1.09107e+08	3.68623e+06	2.65507e+07	718.575	718.574	718.575
0	PC(32:3)+H	PC(32:3)+H	PC	(32:3)	(32:3)				728.522	C40 H75 O8 N1 P1	4.18926e+06	1.34361e+06	3493.95	3.35692e+06	283459	710097	5.69547e+06	1478.55	2.18466e+06	4.12642e+06	572530	3.09066e+06	6.97429e+06	6.88778e+06	2.14239e+06	280057	3.56477e+06	2.09333e+07	1.99888e+06	2.22417e+06	1.64745e+07	283208	171252	311792	1.93542e+06	2.63997e+06	5.76886e+06	0	6.53469e+06	1.60827e+06	1.33978e+06	528223	2.2983e+06	1.89869e+07	288594	6.26488e+06	728.519	728.522	728.522
0	PC(33:0)+H	PC(33:0)+H	PC	(33:0)	(33:0)				748.585	C41 H83 O8 N1 P1	3.85429e+06	1.34132e+06	148231	992097	112910	251606	1.69052e+06	70655.2	1.19987e+06	2.21894e+06	559284	779616	3.59335e+06	5.52248e+06	1.04816e+06	109036	1.27605e+06	2.41591e+07	187257	581702	2.39433e+06	113200	144878	223323	1.74572e+06	2.14139e+06	5.77671e+06	80298.9	2.94041e+06	450617	1.30528e+06	471153	2.10047e+06	9.85897e+06	227682	4838335		748.585	748.585
0	PC(17:1/16:0)+HCOO	PC(33:1)+HCOO	PC	(17:1/16:0)	(17:1)	(16:0)			790.56	C42 H81 O10 N1 P1	4.58216e+06	2.59393e+06	254230	1.55943e+06	165608	785067	2.66581e+06	341247	728007	2.4723e+06	411378	1.36043e+06	2.73342e+06	3.12451e+06	2.00341e+06	256578	2.32174e+06	8.92972e+06	594175	629618	6.49156e+06	382570	454403	106188	1.21361e+06	1.60852e+06	3.41929e+06	0	3.31063e+06	847794	882060	423820	3.4243e+06	7.63292e+06	536522	2.95303e+06	790.56	790.56	790.56
0	PC(33:1)+H	PC(33:1)+H	PC	(17:1/16:0)	(17:1)	(16:0)			746.569	C41 H81 O8 N1 P1	2.65726e+07	1.40123e+07	4.80099e+06	1.51134e+07	4.32024e+06	8.58647e+06	1.8407e+07	3.76127e+06	9.56697e+06	1.90934e+07	6.8712e+06	1.07844e+07	3.02149e+07	2.28886e+07	1.221e+07	3.41644e+06	1.8411e+07	1.1015e+08	8.23231e+06	8.81818e+06	6.60549e+07	4.28867e+06	5.28805e+06	4.80053e+06	1.571e+07	1.43967e+07	2.80153e+07	1.22944e+06	2.40974e+07	1.14726e+07	8.03816e+06	4.16646e+06	2.18333e+07	8.40162e+07	4.34695e+06	2.28153e+07	746.569	746.569	746.569
0	PC(33:2)+H	PC(33:2)+H	PC	(33:2)	(33:2)				744.554	C41 H79 O8 N1 P1	7.41137e+06	4.01086e+06	1.92592e+06	3.65662e+06	1.11884e+06	3.36813e+06	5.58103e+06	1.05738e+06	2.32198e+06	5.40441e+06	3.62255e+06	4.82132e+06	1.17864e+07	1.04725e+07	8.32173e+06	1.383e+06	7.03665e+06	3.21795e+07	3.42172e+06	3.73028e+06	2.20923e+07	2.9266e+06	2.00213e+06	2.67835e+06	5.05203e+06	5.3145e+06	9.11283e+06	619851	7.43509e+06	4.28127e+06	2.53533e+06	1.53923e+06	6.04208e+06	1.8384e+07	420559	5.95444e+06	744.554	744.554	744.554
0	PC(18:0/16:0)+HCOO	PC(34:0)+HCOO	PC	(18:0/16:0)	(18:0)	(16:0)			806.592	C43 H85 O10 N1 P1	1.3044e+08	6.91538e+07	3.55424e+07	8.78826e+07	2.9021e+07	5.44369e+07	1.16728e+08	2.38156e+07	6.48776e+07	8.95616e+07	4.02573e+07	6.18832e+07	1.58978e+08	9.95142e+07	9.54574e+07	2.51274e+07	8.89897e+07	3.33257e+08	6.57754e+07	5.64756e+07	2.96766e+08	1.61743e+07	3.81668e+07	2.97148e+07	8.22464e+07	6.70529e+07	1.58822e+08	9.99677e+06	1.29993e+08	6.21124e+07	7.16703e+07	4.49911e+07	1.27946e+08	2.75203e+08	3.78814e+07	1.59716e+08	806.593	806.593	806.593
0	PC(34:0)+H	PC(34:0)+H	PC	(18:0/16:0)	(18:0)	(16:0)			762.601	C42 H85 O8 N1 P1	9.20849e+08	4.04112e+08	1.80238e+08	5.37074e+08	1.45123e+08	3.06608e+08	7.37962e+08	1.19994e+08	3.27888e+08	5.69996e+08	2.15864e+08	3.69096e+08	1.17043e+09	7.72515e+08	5.67267e+08	1.41825e+08	6.00234e+08	3.0161e+09	3.91012e+08	3.37058e+08	2.39305e+09	8.6402e+07	2.05006e+08	1.7194e+08	5.00602e+08	3.92233e+08	1.11147e+09	5.03229e+07	9.24016e+08	3.59009e+08	4.47829e+08	2.36892e+08	9.13086e+08	2.40872e+09	2.01804e+08	1.1376e+09	762.6	762.6	762.6
0	PC(18:0e/16:0)+HCOO	PC(34:0e)+HCOO	PC	(18:0e/16:0)	(18:0e)	(16:0)			792.612	C43 H87 O9 N1 P1	3.05344e+06	15247.7	753688	2.24335e+06	2631.29	1.0412e+06	2.50361e+06	328017	1.87022e+06	1.95578e+06	416480	1.25063e+06	3.57175e+06	2.37591e+06	1.78046e+06	341359	2.71881e+06	9.89546e+06	908610	966511	7.2429e+06	147421	330650	570241	1.82339e+06	1.38717e+06	3.29974e+06	0	4.06816e+06	219276	1.37532e+06	611695	3.70248e+06	7.68976e+06	337426	4.05813e+06	792.614	792.614	792.612
0	PC(34:0e)+H	PC(34:0e)+H	PC	(18:0e/16:0)	(18:0e)	(16:0)			748.621	C42 H87 O7 N1 P1	2.33617e+07	1.24247e+07	2.79241e+06	2.32657e+07	3.40752e+06	6.85206e+06	1.81997e+07	2.1594e+06	7.79547e+06	1.2917e+07	5.942e+06	1.01147e+07	3.1308e+07	2.26047e+07	1.12741e+07	3.30882e+06	1.03433e+07	1.0287e+08	7.81419e+06	8.89796e+06	7.27235e+07	195099	4.50476e+06	3.80113e+06	1.7108e+07	1.42455e+07	2.80903e+07	433358	2.37801e+07	1.01403e+07	9.52913e+06	4.88954e+06	2.51433e+07	7.52772e+07	4.30811e+06	2.61243e+07	748.621	748.621	748.621
0	PC(16:0/18:1)+HCOO	PC(34:1)+HCOO	PC	(16:0/18:1)	(16:0)	(18:1)			804.576	C43 H83 O10 N1 P1	7.76837e+08	4.40628e+08	2.23963e+08	5.6801e+08	1.70897e+08	3.51906e+08	6.18982e+08	1.69755e+08	3.23052e+08	5.52723e+08	2.55267e+08	4.01822e+08	7.8238e+08	6.81408e+08	4.85936e+08	1.59988e+08	5.83983e+08	1.52434e+09	3.72778e+08	3.29494e+08	1.38092e+09	1.49276e+08	2.14443e+08	1.82223e+08	4.9287e+08	4.94191e+08	8.04351e+08	7.17103e+07	7.19431e+08	4.05358e+08	3.48823e+08	2.13599e+08	6.98151e+08	1.40305e+09	1.83445e+08	6.50533e+08	804.577	804.577	804.578
0	PC(34:1)+H	PC(34:1)+H	PC	(16:0/18:1)	(16:0)	(18:1)			760.585	C42 H83 O8 N1 P1	7.40878e+09	4.32289e+09	1.84517e+09	5.8398e+09	1.34571e+09	3.29666e+09	6.28391e+09	1.30182e+09	3.00448e+09	5.68613e+09	2.44066e+09	3.81585e+09	8.44287e+09	6.98422e+09	4.76808e+09	1.30655e+09	5.71695e+09	1.40548e+10	3.62333e+09	3.15444e+09	1.16798e+10	1.28617e+09	1.7625e+09	1.66485e+09	4.81057e+09	4.7132e+09	8.11907e+09	4.60812e+08	7.33599e+09	3.88727e+09	3.37682e+09	1.79223e+09	6.70703e+09	1.32865e+10	1.4833e+09	7.07907e+09	760.585	760.585	760.585
0	PC(34:1e)+H	PC(34:1e)+H	PC	(34:1e)	(34:1e)				746.606	C42 H85 O7 N1 P1	1.12023e+08	4.93122e+07	1.60932e+07	5.3421e+07	1.39474e+07	3.57952e+07	5.29336e+07	1.10796e+07	2.59546e+07	4.92899e+07	2.17097e+07	3.81986e+07	1.03805e+08	8.16505e+07	4.10225e+07	1.47784e+07	5.62364e+07	4.03027e+08	2.99291e+07	2.90654e+07	3.05722e+08	8.74118e+06	1.62065e+07	1.6127e+07	5.47809e+07	5.65928e+07	1.14815e+08	5.86681e+06	8.41628e+07	3.96462e+07	2.9115e+07	1.75655e+07	7.56339e+07	3.68019e+08	1.12289e+07	8.29741e+07	746.606	746.606	746.606
0	PC(34:1e)+H	PC(34:1e)+H	PC	(34:1e)	(34:1e)				746.606	C42 H85 O7 N1 P1	4.81791e+06	4.66746e+06	1.01297e+06	5.35633e+06	2082.3	954554	4.70919e+06	238468	1.80283e+06	987497	1.4796e+06	2.78656e+06	7.24154e+06	5.8714e+06	4.47004e+06	962194	4.06912e+06	2.34951e+07	2.66205e+06	6359.1	1.69272e+07	3075.76	107962	462975	3.55115e+06	3.10466e+06	4.83645e+06	0	6.17396e+06	1.66654e+06	3.03958e+06	5444.48	8.31352e+06	2.39208e+07	1.30482e+06	7.01823e+06	746.606	746.604	746.606
0	PC(16:0p/18:1)+HCOO	PC(34:1p)+HCOO	PC	(16:0p/18:1)	(16:0p)	(18:1)			788.581	C43 H83 O9 N1 P1	4.21441e+06	2.01119e+06	105527	1.08349e+06	129078	1.18098e+06	633175	0	281102	2.13154e+06	327292	738392	2.25665e+06	2.60534e+06	851466	160668	1.01583e+06	6.37403e+06	596634	174257	6.83326e+06	673307	98653.6	602888	2.90386e+06	3.15701e+06	3.82561e+06	2529.98	3.20908e+06	1.45147e+06	617454	481795	1.64072e+06	8.44225e+06	0	1.64087e+06	788.582	788.581	788.581
0	PC(16:1/18:1)+HCOO	PC(34:2)+HCOO	PC	(16:1/18:1)	(16:1)	(18:1)			802.56	C43 H81 O10 N1 P1	3.79548e+06	1.33001e+06	4.60559e+06	1.39273e+06	3.82584e+06	8.21233e+06	2.66238e+06	4.24263e+06	8.45238e+06	2.46459e+06	7.26335e+06	1.59773e+06	4.275e+06	4.31649e+06	1.52704e+06	3.94405e+06	3.62209e+06	1.27398e+07	9.65064e+06	7.41867e+06	7.86365e+06	3.73065e+06	4.90129e+06	4.78775e+06	2.0714e+06	2.52298e+06	3.70012e+06	1.42243e+06	3.83783e+06	2.19157e+06	8.39179e+06	4.57472e+06	2.83326e+06	8.09821e+06	3.11438e+06	2.61773e+06	802.561	802.562	802.562
0	PC(34:2)+H	PC(34:2)+H	PC	(16:1/18:1)	(16:1)	(18:1)			758.569	C42 H81 O8 N1 P1	7.39335e+07	1.01498e+08	9.03644e+06	1.12567e+08	5.42887e+06	1.09879e+08	1.8456e+08	1.14534e+07	4.43384e+06	4.73427e+07	7.93473e+07	2.56553e+07	2.56984e+08	6.93085e+07	1.1867e+08	3.64379e+07	1.86651e+08	1.96581e+08	1.14199e+08	5.02259e+06	3.98194e+08	1.16002e+07	5.99026e+07	5.15244e+07	1.4135e+08	1.33491e+08	2.19576e+08	2.19256e+06	2.7093e+08	1.30399e+08	2.35864e+07	1.3742e+07	1.42059e+08	3.63682e+08	2.43525e+07	1.16213e+08	758.57	758.569	758.57
1	PC(34:2e)+H	PC(34:2e)+H	PC	(34:2e)	(34:2e)				744.59	C42 H83 O7 N1 P1	2.50164e+07	1.33242e+07	2.66182e+06	8.48644e+06	2.10347e+06	7.8186e+06	8.17882e+06	1.41808e+06	3.7139e+06	8.21455e+06	2.80342e+06	5.20859e+06	1.64632e+07	1.59279e+07	6.49988e+06	2.28343e+06	8.36717e+06	6.35339e+07	4.54275e+06	4.07403e+06	4.40949e+07	3.73512e+06	2.64264e+06	3.10284e+06	1.18776e+07	1.45837e+07	2.00896e+07	1.24948e+06	1.58945e+07	7.49443e+06	4.49512e+06	2.39501e+06	1.489e+07	6.53859e+07	1.1603e+06	1.21157e+07	744.59	744.589	744.59
0	PC(34:3)+H	PC(34:3)+H	PC	(34:3)	(34:3)				756.554	C42 H79 O8 N1 P1	1.1254e+06	721487	147545	872821	176337	512318	1.81234e+06	290557	523899	992535	380214	712866	1.33445e+06	1.05333e+06	405409	106203	751016	6.79855e+06	702135	291916	4.81846e+06	84433	199919	241862	485164	373060	1.99805e+06	0	2.16806e+06	800526	671717	0	1.52261e+06	4.02786e+06	118327	1.75146e+06	756.554	756.554	756.554
0	PC(16:0/18:3)+H	PC(34:3)+H	PC	(16:0/18:3)	(16:0)	(18:3)			756.554	C42 H79 O8 N1 P1	1.09018e+08	8.92846e+07	5.43763e+07	1.06884e+08	4.26615e+07	7.2741e+07	1.15449e+08	3.91733e+07	8.19016e+07	1.02147e+08	6.48444e+07	7.40863e+07	1.26359e+08	1.06057e+08	1.021e+08	4.56306e+07	9.63105e+07	8.5671e+07	8.48852e+07	8.10459e+07	1.05413e+08	3.09285e+07	5.71927e+07	4.69215e+07	9.35127e+07	7.6061e+07	1.26066e+08	1.29859e+07	1.05878e+08	8.78991e+07	9.5118e+07	6.11796e+07	1.09656e+08	1.03941e+08	5.53244e+07	1.22394e+08	756.552	756.551	756.552
0	PC(34:4)+H	PC(34:4)+H	PC	(34:4)	(34:4)				754.538	C42 H77 O8 N1 P1	2.62629e+07	1.37449e+07	1.93623e+06	1.27631e+07	2.49145e+06	9.16269e+06	2.03456e+07	2.06312e+06	8.38419e+06	1.39929e+07	6.93762e+06	1.0089e+07	2.44743e+07	2.62299e+07	1.16552e+07	1.84983e+06	2.36413e+07	8.27691e+07	9.82954e+06	9.0063e+06	9.26431e+07	3.0734e+06	4.28614e+06	5.62646e+06	1.13656e+07	2.07484e+07	4.11535e+07	198536	2.7233e+07	1.20266e+07	8.79627e+06	2.65179e+06	3.20101e+07	9.27128e+07	3.04206e+06	3.09932e+07	754.535	754.535	754.536
0	PC(17:0/18:1)+HCOO	PC(35:1)+HCOO	PC	(17:0/18:1)	(17:0)	(18:1)			818.592	C44 H85 O10 N1 P1	8.26189e+06	4.49234e+06	1.11096e+06	4.96813e+06	1.31234e+06	2.33362e+06	3.67627e+06	602725	2.88733e+06	4.33938e+06	2.09238e+06	3.1003e+06	6.87191e+06	6.67278e+06	3.91065e+06	1.33198e+06	4.69848e+06	1.90427e+07	1.7736e+06	1.27053e+06	1.31497e+07	1.07178e+06	1.15775e+06	673505	4.05699e+06	4.85919e+06	7.42169e+06	0	6.31109e+06	3.67656e+06	2.66109e+06	994954	6.20511e+06	1.61264e+07	507868	7.05168e+06	818.594	818.594	818.592
0	PC(17:0/18:1)+H	PC(35:1)+H	PC	(17:0/18:1)	(17:0)	(18:1)			774.601	C43 H85 O8 N1 P1	4.95452e+07	2.99569e+07	7.06446e+06	2.34724e+07	7.78225e+06	1.75734e+07	2.47411e+07	6.22857e+06	1.25697e+07	2.64046e+07	1.04888e+07	2.04838e+07	6.2507e+07	4.98851e+07	2.23365e+07	9.34326e+06	2.68847e+07	2.31066e+08	1.48473e+07	1.64763e+07	1.02904e+08	7.77413e+06	9.81607e+06	9.06751e+06	2.77976e+07	2.57585e+07	5.92421e+07	2.56198e+06	3.63757e+07	2.14346e+07	1.58928e+07	7.2994e+06	3.40171e+07	1.72134e+08	7.12813e+06	3.60193e+07	774.601	774.6	774.601
0	PC(35:2)+H	PC(35:2)+H	PC	(35:2)	(35:2)				772.585	C43 H83 O8 N1 P1	3.91705e+06	1.49808e+06	0	1.92355e+06	97790.4	724118	1.43316e+06	0	420787	2.81696e+06	282145	741892	3.8897e+06	2.82512e+06	1.02979e+06	130194	1.94825e+06	1.20003e+07	580026	348609	7.88839e+06	267701	0	147375	1.81576e+06	1.92578e+06	3.0235e+06	387607	3.14714e+06	1.14691e+06	566033	131246	2.47988e+06	1.20865e+07	130816	2.16489e+06	772.586	772.585
0	PC(17:1/18:1)+H	PC(35:2)+H	PC	(17:1/18:1)	(17:1)	(18:1)			772.585	C43 H83 O8 N1 P1	9.4973e+06	5.00724e+06	618426	4.06404e+06	463858	3.6246e+06	5.02402e+06	1.17835e+06	1.86618e+06	4.86578e+06	2.94231e+06	5.6544e+06	9.32459e+06	1.32382e+07	7.41535e+06	3.18608e+06	5.93165e+06	4.03186e+07	1.56876e+06	3.05469e+06	1.45143e+07	4.76981e+06	2.23404e+06	3.4217e+06	7.01629e+06	6.12305e+06	9.75915e+06	592677	4.9376e+06	4.3171e+06	2.54716e+06	1.21003e+06	7.60408e+06	2.88614e+07	122226	7.62671e+06	772.585	772.585	772.585
0	PC(35:4)+H	PC(35:4)+H	PC	(35:4)	(35:4)				768.554	C43 H79 O8 N1 P1	4.15015e+08	1.89415e+08	9.60564e+07	2.78558e+08	5.99134e+07	1.58449e+08	3.73702e+08	6.28836e+07	1.43628e+08	2.77089e+08	1.10941e+08	2.07947e+08	5.04095e+08	3.78729e+08	2.5606e+08	7.93474e+07	3.00586e+08	1.55624e+09	1.78776e+08	1.60948e+08	1.23062e+09	6.6282e+07	9.02112e+07	8.73204e+07	2.72012e+08	2.26821e+08	5.47274e+08	3.24642e+07	4.1939e+08	1.88052e+08	1.64046e+08	9.13875e+07	3.98694e+08	1.13297e+09	6.34541e+07	4.03709e+08	768.554	768.554	768.554
0	PC(20:0/16:0)+HCOO	PC(36:0)+HCOO	PC	(20:0/16:0)	(20:0)	(16:0)			834.623	C45 H89 O10 N1 P1	1.21737e+07	7.75843e+06	2.42689e+06	6.76548e+06	3.58045e+06	7.14462e+06	6.58829e+06	2.08122e+06	2.83862e+06	5.64293e+06	3.81479e+06	5.75461e+06	1.28006e+07	1.15045e+07	7.96421e+06	4.67674e+06	7.25282e+06	2.33667e+07	5.24588e+06	5.18318e+06	2.06984e+07	3.97095e+06	3.91256e+06	4.60762e+06	1.01631e+07	1.01245e+07	1.17019e+07	1.46584e+06	9.17088e+06	6.43296e+06	7.03374e+06	4.03061e+06	1.04141e+07	2.40302e+07	2.81496e+06	1.08034e+07	834.624	834.623	834.623
0	PC(36:0)+H	PC(36:0)+H	PC	(20:0/16:0)	(20:0)	(16:0)			790.632	C44 H89 O8 N1 P1	9.91074e+06	6.85943e+06	909508	7.72456e+06	248449	2.5685e+06	8.95653e+06	621876	1.47854e+06	5.43189e+06	2.25494e+06	5.22503e+06	1.65548e+07	1.29341e+07	7.27267e+06	1.31459e+06	8.49457e+06	6.3331e+07	5.36534e+06	4.4797e+06	4.12243e+07	219221	1.93104e+06	2.00743e+06	7.25273e+06	8.39051e+06	1.61856e+07	222332	5.21822e+06	4.58975e+06	6.30266e+06	1.88503e+06	1.23368e+07	5.06384e+07	1.47571e+06	1.46307e+07	790.632	790.632	790.632
0	PC(36:0e)+H	PC(36:0e)+H	PC	(36:0e)	(36:0e)				776.653	C44 H91 O7 N1 P1	4646.68	3047.61	0	1715.52	0	0	305130	0	0	0	2137.54	0	4744.61	323058	4540.38	0	534403	3.14975e+06	0	83220.6	2.48624e+06	0	1277.87	0	179436	146276	780039	0	697645	0	0	0	3181.76	1.90493e+06	0	532279	776.653	776.653
0	PC(16:0/20:1)+HCOO	PC(36:1)+HCOO	PC	(16:0/20:1)	(16:0)	(20:1)			832.607	C45 H87 O10 N1 P1	3.03838e+08	1.51667e+08	6.97274e+07	1.81057e+08	6.23377e+07	1.367e+08	2.23242e+08	4.7061e+07	1.00729e+08	1.72335e+08	8.88911e+07	1.53106e+08	3.23317e+08	2.9041e+08	1.79794e+08	6.22759e+07	2.14453e+08	7.51512e+08	1.21956e+08	1.12e+08	6.00886e+08	6.51167e+07	7.47711e+07	7.92908e+07	2.23673e+08	2.1084e+08	3.46392e+08	2.69564e+07	2.70908e+08	1.50658e+08	1.23851e+08	6.91822e+07	2.77769e+08	6.71052e+08	5.44107e+07	2.59586e+08	832.609	832.609	832.609
0	PC(36:1)+H	PC(36:1)+H	PC	(16:0/20:1)	(16:0)	(20:1)			788.616	C44 H87 O8 N1 P1	2.44216e+09	1.0227e+09	4.00149e+08	1.36071e+09	3.56519e+08	8.54079e+08	1.6212e+09	2.78202e+08	6.01464e+08	1.25956e+09	5.61399e+08	1.04532e+09	2.77739e+09	2.49511e+09	1.31597e+09	4.07041e+08	1.62442e+09	8.05722e+09	8.15517e+08	7.99179e+08	5.72477e+09	3.76033e+08	4.46854e+08	4.70404e+08	1.68277e+09	1.70158e+09	2.7957e+09	1.53037e+08	2.24446e+09	1.01889e+09	8.73541e+08	4.33472e+08	2.16374e+09	6.53963e+09	2.9215e+08	2.18199e+09	788.616	788.616	788.617
0	PC(36:1e)+H	PC(36:1e)+H	PC	(36:1e)	(36:1e)				774.637	C44 H89 O7 N1 P1	4.86948e+06	7.3914e+06	120627	3.17022e+06	659470	2.39924e+06	1.8605e+06	220010	465281	4.13582e+06	1.16086e+06	4.83747e+06	1.0343e+07	1.09129e+07	3.54346e+06	1.36294e+06	5.81279e+06	4.73869e+07	683154	2.92365e+06	2.99912e+07	2.80768e+06	1.24661e+06	1.18691e+06	9.95757e+06	1.35188e+07	1.05953e+07	518836	8.07196e+06	4.26798e+06	2.50418e+06	595694	3.24842e+06	4.5963e+07	553490	1.13746e+07	774.637	774.637	774.637
0	PC(18:1/18:1)+HCOO	PC(36:2)+HCOO	PC	(18:1/18:1)	(18:1)	(18:1)			830.592	C45 H85 O10 N1 P1	5.00733e+07	2.67127e+07	1.12426e+07	3.00526e+07	1.06147e+07	2.02657e+07	2.90132e+07	1.03317e+07	1.55187e+07	2.46779e+07	1.30425e+07	2.29647e+07	4.32996e+07	4.00617e+07	2.70019e+07	9.54141e+06	3.57321e+07	8.77208e+07	2.017e+07	1.66687e+07	8.53096e+07	1.08906e+07	1.15797e+07	9.84978e+06	3.4698e+07	3.20809e+07	4.81458e+07	3.50997e+06	3.63094e+07	2.32186e+07	1.77124e+07	1.36087e+07	3.92205e+07	1.01709e+08	7.96056e+06	3.25414e+07	830.593	830.593	830.593
0	PC(36:2)+H	PC(36:2)+H	PC	(18:1/18:1)	(18:1)	(18:1)			786.601	C44 H85 O8 N1 P1	1.41421e+08	5.57159e+07	2.00237e+07	7.37553e+07	1.52827e+07	2.21035e+08	1.09308e+08	7.38249e+07	1.63533e+08	7.40024e+07	3.27195e+07	5.88736e+07	5.74332e+08	5.0101e+08	8.25838e+07	2.05943e+07	4.15954e+08	1.79269e+09	1.94803e+08	4.54693e+07	2.28943e+08	2.49739e+07	2.43523e+07	2.60874e+07	9.26098e+07	3.71272e+08	1.14313e+08	9.5992e+06	9.02112e+07	2.52566e+08	2.01685e+08	8.81084e+07	1.25405e+08	3.75818e+08	1.23785e+07	9.61771e+07	786.601	786.6	786.601
0	PC(36:2e)+H	PC(36:2e)+H	PC	(36:2e)	(36:2e)				772.621	C44 H87 O7 N1 P1	1.38512e+07	6.94734e+06	704166	5.37915e+06	982498	4.64503e+06	3.48931e+06	522509	1.90389e+06	3.05175e+06	1.87309e+06	4.2184e+06	6.04465e+06	7.84451e+06	3.11816e+06	1.64724e+06	5.5574e+06	3.4306e+07	2.17008e+06	2.32077e+06	2.22783e+07	2.04996e+06	1.49772e+06	2.22276e+06	7.47886e+06	6.71152e+06	7.37885e+06	212524	7.91842e+06	5.00659e+06	2.4662e+06	1.88928e+06	9.05199e+06	3.08554e+07	616655	6.01818e+06	772.621	772.62	772.621
0	PC(36:2p)+H	PC(36:2p)+H	PC	(36:2p)	(36:2p)				770.606	C44 H85 O7 N1 P1	1.57121e+07	5.90506e+06	885627	5.9051e+06	1.45326e+06	5.20211e+06	5.15816e+06	555357	2.11585e+06	4.72771e+06	1.91623e+06	3.97077e+06	1.00077e+07	1.06291e+07	3.76455e+06	807794	5.43445e+06	4.45684e+07	2.44249e+06	3.00184e+06	2.86499e+07	804106	1.29797e+06	1.43576e+06	7.65877e+06	8.57543e+06	1.22485e+07	73162	1.0285e+07	4.00435e+06	1.67793e+06	1.64593e+06	1.10101e+07	4.56388e+07	218530	7.88586e+06	770.606	770.605	770.606
0	PC(16:0/20:3)+HCOO	PC(36:3)+HCOO	PC	(16:0/20:3)	(16:0)	(20:3)			828.576	C45 H83 O10 N1 P1	8.61954e+06	4.328e+06	151782	7.44714e+06	2.16591e+06	4.5443e+06	3.76738e+06	1.91759e+06	2.36203e+06	5.82421e+06	5064.31	2.08184e+06	1.13656e+07	3.57811e+06	6.60711e+06	1.72785e+06	7.50469e+06	1.53612e+06	4.85149e+06	4.89892e+06	7.50489e+06	1.66404e+06	2.08132e+06	10203.7	5.95362e+06	5.30597e+06	1.18618e+07	554492	1.04822e+07	1.38708e+06	4.53927e+06	2.30686e+06	2.44045e+06	1.84511e+07	2.31362e+06	2.95172e+06	828.577	828.576	828.578
0	PC(36:3)+H	PC(36:3)+H	PC	(16:0/20:3)	(16:0)	(20:3)			784.585	C44 H83 O8 N1 P1	5.34609e+07	3.36064e+07	1.79437e+07	2.28188e+07	9.50073e+06	1.79188e+07	4.46483e+07	5.22658e+06	2.75819e+07	4.32576e+07	2.35566e+07	2.45838e+07	1.18504e+08	4.95005e+07	3.16044e+07	1.21756e+07	6.20554e+07	1.40556e+08	3.34712e+07	2.99009e+07	3.5413e+08	5.62393e+06	1.61876e+07	1.58511e+07	2.91196e+07	3.96653e+07	5.56706e+07	4.82955e+06	5.01058e+07	3.86524e+07	1.5314e+07	1.68301e+07	8.1189e+07	2.94062e+08	1.48433e+07	8.20458e+07	784.585	784.585	784.585
0	PC(36:3)+H	PC(36:3)+H	PC	(36:3)	(36:3)				784.585	C44 H83 O8 N1 P1	4.11457e+07	2.05494e+07	9.43609e+06	2.9366e+07	6.84445e+06	1.71208e+07	4.07159e+07	6.28722e+06	1.716e+07	2.43732e+07	1.04296e+07	1.63636e+07	5.34406e+07	2.22735e+07	3.16282e+07	4.69593e+06	2.8825e+07	6.03996e+07	2.27663e+07	9.91802e+06	6.81341e+07	5.34123e+06	1.08555e+07	8.26426e+06	2.33015e+07	2.05035e+07	4.75919e+07	2.81343e+06	3.96356e+07	2.00139e+07	2.30492e+07	1.21099e+07	4.39508e+07	6.44171e+07	1.07761e+07	5.72147e+07	784.585	784.585	784.585
0	PC(16:0/20:4)+HCOO	PC(36:4)+HCOO	PC	(16:0/20:4)	(16:0)	(20:4)			826.56	C45 H81 O10 N1 P1	7.20197e+07	4.16771e+07	2.08424e+07	6.09783e+07	1.39438e+07	3.4177e+07	6.80232e+07	1.41526e+07	3.12415e+07	5.22843e+07	2.53588e+07	3.70688e+07	9.42301e+07	6.54272e+07	4.56554e+07	1.25602e+07	6.01208e+07	1.97594e+08	3.74189e+07	3.18851e+07	1.72653e+08	1.05002e+07	1.91435e+07	1.65308e+07	4.6899e+07	4.3073e+07	8.35512e+07	6.09338e+06	7.4989e+07	3.82419e+07	3.57279e+07	1.98919e+07	7.20014e+07	1.64735e+08	1.71455e+07	7.01156e+07	826.562	826.562	826.562
0	PC(36:4)+H	PC(36:4)+H	PC	(16:0/20:4)	(16:0)	(20:4)			782.569	C44 H81 O8 N1 P1	9.65872e+08	4.14787e+08	1.9548e+08	6.88199e+08	1.16465e+08	3.23481e+08	8.21456e+08	1.34051e+08	3.23264e+08	6.62197e+08	2.39268e+08	4.41893e+08	1.22088e+09	9.72265e+08	4.94376e+08	1.25942e+08	6.98602e+08	3.53835e+09	3.71136e+08	3.50945e+08	2.62807e+09	1.10072e+08	1.56541e+08	1.48845e+08	5.48411e+08	4.99458e+08	1241571572	4.84074e+07	1.0018e+09	4.15084e+08	3.48643e+08	1.80051e+08	9.39294e+08	2.6272e+09	1.52155e+08	1.00601e+09	782.569	782.57	782.57
0	PC(36:4e)+H	PC(36:4e)+H	PC	(36:4e)	(36:4e)				768.59	C44 H83 O7 N1 P1	4.71134e+06	3.39727e+06	1.08821e+06	4.0338e+06	395163	1.50889e+06	4.98254e+06	982390	2.1302e+06	3.84616e+06	1.80221e+06	2.62142e+06	4.42619e+06	4.2488e+06	3.1464e+06	1.75777e+06	3.18508e+06	2.46708e+07	2.01808e+06	1.63862e+06	1.46024e+07	932221	443704	1.13049e+06	2.19204e+06	2.18747e+06	6.43233e+06	284357	4.36743e+06	2.19988e+06	1.84509e+06	656759	3.98052e+06	1.80477e+07	284652	5.16307e+06	768.588	768.59	768.59
0	PC(36:4p)+H	PC(36:4p)+H	PC	(36:4p)	(36:4p)				766.575	C44 H81 O7 N1 P1	2.70721e+08	2.2372e+08	5.08872e+06	3.08836e+06	3.8843e+06	1.77275e+08	1.9861e+08	4.09784e+06	3.79288e+06	1.04893e+07	4.53066e+06	8.50596e+06	2.26898e+08	4.26481e+06	5.11899e+06	2.37363e+06	2.43962e+08	4.43181e+07	1.00083e+06	1.74504e+07	4.15603e+07	9.86691e+06	1.78683e+08	8.63494e+06	3.03386e+08	2.16549e+08	6.20097e+06	5.71506e+06	3.04067e+08	2.14719e+08	6.19406e+06	2.63435e+06	2.74334e+08	6.82733e+06	5.04245e+06	8.91013e+06			766.575
0	PC(16:0/20:5)+HCOO	PC(36:5)+HCOO	PC	(16:0/20:5)	(16:0)	(20:5)			824.545	C45 H79 O10 N1 P1	0	0	0	4078.97	0	0	1622.98	0	0	0	0	0	2686.81	102439	0	0	2211.12	1.09868e+06	0	63793.1	826.553	0	0	0	0	0	8370.23	0	2312.89	0	0	0	0	262625	0	4305.37
0	PC(36:5)+H	PC(36:5)+H	PC	(16:0/20:5)	(16:0)	(20:5)			780.554	C44 H79 O8 N1 P1	3.21798e+06	1.26139e+06	409513	1.6965e+06	132819	966909	2.12634e+06	34165.7	515893	1.38913e+06	392769	849765	2.82875e+06	2.09359e+06	1.09077e+06	27707.7	1.96329e+06	9.66191e+06	1.0399e+06	1.10593e+06	6.3733e+06	359126	338367	55523.2	1.5852e+06	1.79772e+06	2.87816e+06	859737	2.7582e+06	1.66564e+06	1.62544e+06	30625.9	2.14533e+06	8.85818e+06	125144	2.19906e+06	780.553	780.553	780.554
0	PC(36:5p)+HCOO	PC(36:5p)+HCOO	PC	(36:5p)	(36:5p)				808.55	C45 H79 O9 N1 P1	1.24066e+06	1.09707e+06	0	1724.79	0	423575	1.63797e+06	120275	557871	1.43879e+06	1585.29	1.43313e+06	5467.05	2.85607e+06	3583.38	0	875076	9.70848e+06	288675	421609	8910.26	690066	4903	697296	1.80925e+06	1.33787e+06	2.99805e+06	0	5872.66	6043.37	240334	5245.14	1.6758e+06	12881.8	3077.97	1.23866e+06	808.55	808.55
0	PC(14:0p/22:6)+H	PC(36:6p)+H	PC	(14:0p/22:6)	(14:0p)	(22:6)			762.543	C44 H77 O7 N1 P1	8.29947e+06	4.21491e+06	1.19091e+06	4.94156e+06	1.01461e+06	2.53396e+06	5.44052e+06	424165	3.17071e+06	6.07606e+06	1.44931e+06	2.48859e+06	7.36139e+06	6.65829e+06	3.55721e+06	683320	4.77797e+06	69402.5	2.77929e+06	8153.94	1.42843e+07	496826	1.74489e+06	2.10229e+06	3.55479e+06	3.64397e+06	7.41703e+06	91933.8	6.71769e+06	2.4714e+06	2.59003e+06	1.19984e+06	5.91158e+06	1.48725e+07	1.06562e+06	6.88145e+06	762.543	762.543	762.543
0	PC(19:0/18:1)+HCOO	PC(37:1)+HCOO	PC	(19:0/18:1)	(19:0)	(18:1)			846.623	C46 H89 O10 N1 P1	2.54402e+06	1.02303e+06	0	379487	84795	125126	478369	3006.02	128832	646899	1072.72	159387	2.98419e+06	2.11671e+06	439603	1321.81	1.04766e+06	6.03908e+06	0	240400	4.36871e+06	0	42363.4	185445	725757	2.58342e+06	2.54327e+06	0	1.65081e+06	145096	165524	3046.29	1.91193e+06	5.03655e+06	0	1.77539e+06	846.623	846.623
0	PC(37:1)+H	PC(37:1)+H	PC	(19:0/18:1)	(19:0)	(18:1)			802.632	C45 H89 O8 N1 P1	1.28928e+06	4.51138e+06	1.08101e+06	4.08506e+06	1.36099e+06	3.8343e+06	4.99517e+06	708468	733552	4.09395e+06	1.4809e+06	3.76544e+06	9.70007e+06	8.63013e+06	5.09259e+06	1.41587e+06	5.19639e+06	3.29259e+07	2.38318e+06	2.54252e+06	2.06203e+07	2.15111e+06	1.35925e+06	2.33575e+06	4.84222e+06	6.7661e+06	7.46873e+06	267576	4.03958e+06	2.27169e+06	2.85837e+06	1.10275e+06	7.11151e+06	2.41144e+07	585919	4.83842e+06	802.632	802.633	802.632
0	PC(19:0/18:2)+H	PC(37:2)+H	PC	(19:0/18:2)	(19:0)	(18:2)			800.616	C45 H87 O8 N1 P1	3754.85	4091.09	0	0	0	0	3534.41	0	0	27419.7	0	0	307026	2614.23	0	0	175723	4.12026e+06	0	0	1.72466e+06	0	0	2341.22	0	1423.35	90792	0	417085	39045.7	0	0	0	1.83083e+06	0	4970.12	800.616	800.616
0	PC(17:0/20:4)+HCOO	PC(37:4)+HCOO	PC	(17:0/20:4)	(17:0)	(20:4)			840.576	C46 H83 O10 N1 P1	1.31588e+06	0	1583.77	0	0	157427	315424	0	183562	275867	2528.2	0	511093	103207	178657	0	291828	519776	189761	0	1.73944e+06	0	0	0	322178	698904	709365	0	454719	0	0	0	259436	865513	0	412264	840.578		840.576
0	PC(37:4)+H	PC(37:4)+H	PC	(17:0/20:4)	(17:0)	(20:4)			796.585	C45 H83 O8 N1 P1	7.18735e+06	3.64616e+06	1.53039e+06	4.55618e+06	988139	2.25849e+06	4.56456e+06	1.00187e+06	2.82615e+06	5.46779e+06	1.2681e+06	2.47695e+06	6.48648e+06	4.0469e+06	2.70359e+06	496080	4.21436e+06	2.75786e+07	2.66238e+06	3.14067e+06	2.03356e+07	959902	1.67031e+06	2.02896e+06	3.27687e+06	3.75261e+06	6.75088e+06	134844	6.345e+06	2.73493e+06	2.71472e+06	221698	5.87607e+06	1.86604e+07	1.51686e+06	5.75946e+06	796.585	796.585	796.585
0	PC(37:4)+H	PC(37:4)+H	PC	(37:4)	(37:4)				796.585	C45 H83 O8 N1 P1	552826	1.42041e+06	738154	1.72658e+06	331807	2.49996e+06	1.32467e+06	142521	753558	420656	1.82638e+06	763755	2.78339e+06	1.24757e+06	2.4163e+06	0	3.50095e+06	0	889437	705818	1.83044e+06	141608	1.21416e+06	247891	1.36784e+06	517107	2.49241e+06	0	2.96453e+06	4.19934e+06	1.77088e+06	155067	764182	2.56722e+06	12983.9	1.2181e+06	796.585	796.585	796.585
0	PC(37:5)+H	PC(37:5)+H	PC	(37:5)	(37:5)				794.569	C45 H81 O8 N1 P1	4723.14	2.59377e+06	151545	35131	64049.9	2.59453e+06	5.42564e+06	386299	2.20366e+06	4.12685e+06	1.68698e+06	2.34582e+06	7.46352e+06	4.68348e+06	275760	383062	169130	2.06165e+07	4114.17	2.19138e+06	29985.4	437297	58859.5	1.2077e+06	3.48821e+06	2.56451e+06	7.51217e+06	138325	5.76415e+06	2.15596e+06	2.05269e+06	43857.3	4.92017e+06	27782.6	52074.7	6.91478e+06	794.569	794.569	794.569
0	PC(38:0)+H	PC(38:0)+H	PC	(38:0)	(38:0)				818.663	C46 H93 O8 N1 P1	594929	303278	0	0	0	0	285.29	0	0	0	6338.47	5353.39	673063	787001	4002.95	0	4526.52	3.14343e+06	2852.93	0	2.56187e+06	5588.71	2528.5	151735	3914.81	794747	4363.43	0	295394	0	3261.69	0	646953	3.05466e+06	0	608042	818.663	818.663
0	PC(16:0/22:1)+HCOO	PC(38:1)+HCOO	PC	(16:0/22:1)	(16:0)	(22:1)			860.639	C47 H91 O10 N1 P1	1.95049e+07	1.09776e+07	3.22363e+06	9.42094e+06	3.3544e+06	8.90964e+06	1.13591e+07	2.6144e+06	5.02368e+06	8.99385e+06	4.95038e+06	9.05013e+06	2.11001e+07	1.8766e+07	1.04214e+07	5.08945e+06	1.11593e+07	4.74553e+07	6.63357e+06	5.49308e+06	3.42847e+07	5.72009e+06	4.87517e+06	6.14442e+06	1.38192e+07	1.48658e+07	1.86297e+07	1.31547e+06	1.29982e+07	7.80507e+06	6.60177e+06	3.91065e+06	1.49401e+07	4.15344e+07	2.39029e+06	1.43691e+07	860.64	860.641	860.639
0	PC(38:1)+H	PC(38:1)+H	PC	(16:0/22:1)	(16:0)	(22:1)			816.648	C46 H91 O8 N1 P1	6.71917e+07	3.18675e+07	1.06632e+07	3.27454e+07	1.10816e+07	2.73464e+07	3.38207e+07	5.88667e+06	1.50804e+07	2.92368e+07	1.44446e+07	2.86706e+07	7.12521e+07	7.39902e+07	3.07865e+07	1.32153e+07	3.99042e+07	2.81754e+08	2.06217e+07	2.21208e+07	1.64869e+08	1.45372e+07	1.34839e+07	1.64382e+07	4.16107e+07	4.86241e+07	7.06583e+07	4.27601e+06	4.99529e+07	2.59935e+07	2.193e+07	1.20442e+07	5.64482e+07	2.21455e+08	7.27165e+06	5.09418e+07	816.648	816.648	816.648
0	PC(20:1/18:1)+HCOO	PC(38:2)+HCOO	PC	(20:1/18:1)	(20:1)	(18:1)			858.623	C47 H89 O10 N1 P1	9.30499e+06	4.52566e+06	1.59493e+06	4.3187e+06	701268	4.1314e+06	4.55917e+06	1.22085e+06	1.60922e+06	4.17377e+06	2.27333e+06	3.80937e+06	9.54061e+06	9.58432e+06	4.83445e+06	1.7954e+06	5.49975e+06	2.49722e+07	2.97003e+06	2.41773e+06	1.7152e+07	2.36429e+06	1.90918e+06	2.15631e+06	5.61214e+06	5.86505e+06	8.92449e+06	855260	6.87952e+06	4.53525e+06	2.9555e+06	1.40171e+06	7.46205e+06	2.10979e+07	696755	6.07533e+06	858.624	858.624	858.625
0	PC(38:2)+H	PC(38:2)+H	PC	(20:1/18:1)	(20:1)	(18:1)			814.632	C46 H89 O8 N1 P1	1.35629e+07	2.64644e+07	7.89296e+06	6.53543e+06	9.42476e+06	2.63862e+06	2.8878e+07	6.75043e+06	1.11602e+07	2.5131e+07	1.22437e+07	2.62546e+07	5.67289e+07	1.0869e+07	7.35113e+06	1.083e+07	3.36464e+07	4.08031e+07	1.36705e+07	3.82675e+06	1.13541e+08	1.3495e+07	9.33349e+06	1.20737e+07	3.29525e+07	3.75196e+07	5.68261e+07	4.69995e+06	1.20669e+07	4.24042e+06	1.61059e+07	9.37337e+06	7.3341e+06	2.10562e+07	5.49844e+06	783360	814.631	814.631	814.632
0	PC(38:2e)+H	PC(38:2e)+H	PC	(38:2e)	(38:2e)				800.653	C46 H91 O7 N1 P1	2.02814e+08	1.05913e+08	2.22506e+07	6.56891e+07	3.73887e+07	8.36822e+07	6.79481e+07	2.34791e+07	3.17735e+07	5.36496e+07	4.32022e+07	8.01698e+07	2.51676e+08	2.20643e+08	9.14592e+07	4.42468e+07	1.20484e+08	9.63058e+08	5.74646e+07	5.38996e+07	6.36892e+08	6.41717e+07	4.49894e+07	6.49346e+07	1.37031e+08	1.62071e+08	1.81372e+08	1.90436e+07	1.29732e+08	7.95993e+07	6.784e+07	4.30912e+07	1.48252e+08	7.61291e+08	1.90979e+07	1.68762e+08	800.653	800.654	800.653
0	PC(18:0/20:3)+HCOO	PC(38:3)+HCOO	PC	(18:0/20:3)	(18:0)	(20:3)			856.607	C47 H87 O10 N1 P1	4.2927e+06	2.06939e+06	1.23473e+06	3.23159e+06	1.41465e+06	2.66006e+06	3.95226e+06	523999	1.67325e+06	2.33956e+06	1.51148e+06	2.53153e+06	6.17691e+06	4.55236e+06	2.96118e+06	674001	3.8877e+06	1.50807e+07	2.67181e+06	2.02696e+06	1.35442e+07	733783	1.18465e+06	1.31383e+06	3.62487e+06	4.27526e+06	6.21168e+06	132562	5.72667e+06	2.60145e+06	2.96825e+06	1.35223e+06	3.6764e+06	1.095e+07	442484	4.14162e+06	856.608	856.608	856.607
0	PC(38:3)+H	PC(38:3)+H	PC	(18:0/20:3)	(18:0)	(20:3)			812.616	C46 H87 O8 N1 P1	3.25135e+06	1.36887e+07	7.86188e+06	2.41672e+07	5.47246e+06	1.3151e+07	2.90449e+07	5.19017e+06	9.86804e+06	2.01507e+07	9.68718e+06	1.5739e+07	4.43452e+07	2.97558e+06	2.09496e+07	6.2959e+06	2.65082e+07	1.71098e+08	1.55753e+07	1.35873e+07	1.24744e+08	5.27402e+06	7.51993e+06	7.40575e+06	2.26078e+07	2.06346e+07	4.92292e+07	3.71949e+06	3.67092e+07	1.56813e+07	1.44361e+07	7.59537e+06	3.003e+07	1.25604e+07	5.57016e+06	3.33538e+07	812.617	812.616	812.617
0	PC(38:3e)+H	PC(38:3e)+H	PC	(38:3e)	(38:3e)				798.637	C46 H89 O7 N1 P1	5.72867e+06	3.56589e+06	986406	3.48557e+06	1.25798e+06	3.59536e+06	3.93353e+06	1.18793e+06	967652	1.59532e+06	1.96567e+06	2.89322e+06	9.32657e+06	8.18686e+06	3.68819e+06	1.13826e+06	3.874e+06	4.5815e+07	2.42412e+06	1.7599e+06	2.30324e+07	1.90355e+06	1.79924e+06	2.48931e+06	1.01907e+07	7.09211e+06	6.5111e+06	212458	4.93167e+06	4.06031e+06	1.71941e+06	1.51711e+06	5.35744e+06	3.565e+07	736405	5.89162e+06	798.637	798.637	798.637
0	PC(16:0/22:4)+HCOO	PC(38:4)+HCOO	PC	(16:0/22:4)	(16:0)	(22:4)			854.592	C47 H85 O10 N1 P1	9.75423e+06	3.96422e+06	2.64853e+06	7.0472e+06	1.72016e+06	4.21324e+06	7.76054e+06	1.5254e+06	3.34866e+06	5.6118e+06	2.44596e+06	3.02756e+06	8.5321e+06	7.14187e+06	5.13009e+06	1.38761e+06	6.01434e+06	2.10627e+07	3.30101e+06	3.12966e+06	2.01484e+07	941457	2.7487e+06	1.52186e+06	5.06573e+06	4.82684e+06	1.04626e+07	7.61877e+06	7.19195e+07	4.33516e+06	4.13555e+06	2.12204e+06	8.06926e+06	1.95151e+07	1.82512e+06	9.03709e+06	854.593	854.593	854.593
0	PC(38:4)+H	PC(38:4)+H	PC	(16:0/22:4)	(16:0)	(22:4)			810.601	C46 H85 O8 N1 P1	6.60781e+07	2.39281e+07	1.75401e+07	6.47718e+08	1.04829e+07	2.62328e+07	7.03675e+08	1.01764e+07	3.23305e+08	6.19556e+08	2.72876e+08	4.39852e+08	9.16233e+08	1.15442e+07	6.30435e+06	1.44745e+08	6.49326e+08	2.85216e+08	4.04788e+08	3.64874e+08	1.36212e+09	1.15253e+08	1.90998e+08	1.63555e+08	5.79989e+08	3.33562e+07	9.5417e+08	5.27823e+07	6.58866e+07	2.83772e+07	4.07834e+08	2.00649e+08	7.79115e+08	1.40765e+09	1.7458e+08	7.66631e+08	810.6	810.6	810.601
0	PC(38:4e)+H	PC(38:4e)+H	PC	(38:4e)	(38:4e)				796.621	C46 H87 O7 N1 P1	1.03508e+06	240393	0	8699.26	0	273597	877632	0	139695	222021	0	294373	1.25759e+06	848270	535774	0	2566.24	5.83085e+06	297701	491068	5.11125e+06	0	112628	0	346797	183525	1.74258e+06	0	1.18157e+06	415017	3100.56	176893	1.36219e+06	4.77124e+06	0	888221	796.621	796.621
0	PC(38:4p)+H	PC(38:4p)+H	PC	(38:4p)	(38:4p)				794.606	C46 H85 O7 N1 P1	1.76362e+06	255127	0	698353	1948.31	4369.45	519524	0	0	1741.71	241.245	0	1.70259e+06	1.33189e+06	158856	0	5990.73	7.49888e+06	3033.41	1485.54	19859.4	956.285	0	496.079	1.08961e+06	648017	2.11522e+06	1922.33	1.1257e+06	310827	9646.77	0	1.53815e+06	7.31943e+06	0	1.47019e+06	794.606	794.606
0	PC(18:1/20:4)+HCOO	PC(38:5)+HCOO	PC	(18:1/20:4)	(18:1)	(20:4)			852.576	C47 H83 O10 N1 P1	1.86743e+07	1.0092e+07	4.95597e+06	1.35486e+07	2.83299e+06	7.01371e+06	1.36209e+07	3.35717e+06	6.52388e+06	1.1596e+07	5.22159e+06	8.03802e+06	2.25249e+07	1.5713e+07	9.74187e+06	2.35139e+06	1.4142e+07	4.74423e+07	8.56624e+06	6.23839e+06	4.15406e+07	2.62657e+06	3.98961e+06	3.33753e+06	1.17532e+07	1.05864e+07	1.84227e+07	1.12411e+06	1.536e+07	7.18016e+06	9.10283e+06	4.99988e+06	1.89029e+07	4.06698e+07	3.42024e+06	1.42321e+07	852.577	852.577	852.577
0	PC(38:5)+H	PC(38:5)+H	PC	(18:1/20:4)	(18:1)	(20:4)			808.585	C46 H83 O8 N1 P1	2.41165e+06	8.31357e+07	4.03266e+07	5.74507e+06	2.67961e+07	6.82828e+07	1.46541e+08	2.79986e+07	6.1987e+07	5.24417e+06	4.92102e+07	9.27222e+07	6.0099e+06	2.09011e+08	1.01001e+08	2.34165e+07	1.56851e+08	7.4175e+08	7.67271e+07	6.78777e+07	6.46363e+08	2.2602e+07	3.2312e+07	2.81175e+07	1.27718e+08	1.03174e+08	1.47809e+07	1.03224e+07	1.99346e+08	7.87472e+07	8.09348e+07	3.89845e+07	8.05633e+06	3.3446e+07	3.25016e+07	9.32852e+06	808.584	808.585	808.585
0	PC(16:0/22:6)+HCOO	PC(38:6)+HCOO	PC	(16:0/22:6)	(16:0)	(22:6)			850.56	C47 H81 O10 N1 P1	6.28196e+07	6.77125e+06	3.32252e+06	9.72311e+06	1.10071e+07	6.71738e+06	1.10789e+07	1.11392e+07	6.73864e+06	1.21636e+07	2.05309e+07	7.6161e+06	8.26547e+07	6.51361e+07	7.8758e+06	2.7724e+06	4.72841e+07	1.68687e+08	8.05926e+06	6.62659e+06	1.49362e+08	7.90149e+06	1.61982e+07	3.19072e+06	3.75199e+07	3.44651e+07	7.1576e+07	980812	1.53612e+07	7.71966e+06	5.45657e+06	3.70465e+06	1.288e+07	3.42488e+07	3.64292e+06	1.36805e+07	850.562	850.561	850.561
0	PC(38:6)+H	PC(38:6)+H	PC	(16:0/22:6)	(16:0)	(22:6)			806.569	C46 H81 O8 N1 P1	1.28154e+08	4.47834e+07	1.2394e+08	3.36378e+08	7.21952e+07	4.13333e+07	7.64192e+07	8.00752e+07	2.12086e+08	3.11881e+06	1.46444e+08	2.11213e+06	4.03391e+06	3.58268e+06	2.82107e+08	1.50834e+07	7.11427e+07	3.58528e+08	5.15644e+07	1.85981e+08	1.42357e+09	5.71153e+07	1.10806e+08	9.87377e+07	2.67591e+08	5.29031e+07	4.50147e+06	3.19268e+07	5.48112e+08	2.20064e+06	4.5252e+07	2.44206e+07	9.52473e+07	7.57727e+06	1.06168e+08	5.21464e+08	806.569	806.569	806.57
0	PC(38:6p)+H	PC(38:6p)+H	PC	(38:6p)	(38:6p)				790.575	C46 H81 O7 N1 P1	2.01323e+07	6.16537e+06	3.82812e+06	1.01456e+07	1.96098e+06	5.01069e+06	1.18714e+07	2.5244e+06	5.69529e+06	1.06578e+07	4.13326e+06	9.49865e+06	2.79742e+07	1.7626e+07	1.10325e+07	2.09372e+06	1.52865e+07	5.08822e+07	7.93521e+06	5.41774e+06	4.29903e+07	1.49172e+06	4.3695e+06	2.71611e+06	9.09333e+06	7.72232e+06	1.74338e+07	228940	1.83671e+07	6.49146e+06	5.62938e+06	2.56436e+06	1.60423e+07	3.2403e+07	1.745e+06	1.3166e+07	790.574	790.574	790.574
0	PC(38:7)+H	PC(38:7)+H	PC	(38:7)	(38:7)				804.554	C46 H79 O8 N1 P1	2.04585e+06	757235	346747	1.5587e+06	66701.8	549407	1.62652e+06	260852	438239	1.59492e+06	932020	876022	4.50258e+06	2.01921e+06	1.29443e+06	194196	1.34149e+06	5.43899e+06	1.10324e+06	654889	4.13993e+06	58411.9	136252	204360	382971	593069	2.47719e+06	89302.4	2.32356e+06	776517	626047	244399	2.2676e+06	5.19677e+06	309138	4.19386e+06	804.553	804.554	804.554
0	PC(38:7)+H	PC(38:7)+H	PC	(38:7)	(38:7)				804.554	C46 H79 O8 N1 P1	5.0444e+07	2.18636e+07	8.95475e+06	3.65898e+07	6.78103e+06	1.44441e+07	4.33754e+07	5.57864e+06	1.82625e+07	3.514e+07	9.30497e+06	2.19754e+07	5.01029e+07	5.08954e+07	2.02955e+07	4.9122e+06	3.63549e+07	1.4067e+08	1.99143e+07	1.95612e+07	1.14271e+08	4.74764e+06	6.17422e+06	6.5682e+06	2.76682e+07	2.44886e+07	6.59411e+07	1.91e+06	6.01433e+07	2.32638e+07	1.63938e+07	8.98852e+06	5.74639e+07	1.02889e+08	6.99331e+06	4.86598e+07	804.554	804.551	804.551
0	PC(39:1)+H	PC(39:1)+H	PC	(39:1)	(39:1)				830.663	C47 H93 O8 N1 P1	2.92328e+06	1.57092e+06	140324	880248	807902	1.62675e+06	933998	186567	138859	527008	226048	1.00791e+06	2.76326e+06	3.06825e+06	1.76556e+06	227791	1.37486e+06	1.36316e+07	180217	399170	6.48984e+06	578949	233200	368250	2.29759e+06	2.49353e+06	3.5402e+06	107469	2.46739e+06	1.15018e+06	747689	470839	2.32643e+06	1.04861e+07	0	2.47012e+06	830.664	830.663	830.663
0	PC(39:4)+H	PC(39:4)+H	PC	(39:4)	(39:4)				824.616	C47 H87 O8 N1 P1	5960.12	239510	2008.27	684711	0	274413	141997	0	0	200836	95797.7	231257	7720.25	297102	2870.14	0	1708.36	3.84746e+06	2997.2	0	842187	0	0	0	556341	469977	309874	0	564885	0	115686	0	386338	2.58593e+06	0	643423	824.616	824.616	824.616
0	PC(39:5)+H	PC(39:5)+H	PC	(39:5)	(39:5)				822.601	C47 H85 O8 N1 P1	219359	93135.2	0	3431.78	0	0	277914	0	0	0	0	86795.2	130428	248273	3631.77	75769	1715.38	2.36061e+06	2536.25	119956	1.31611e+06	0	0	0	539.242	285630	401448	0	342813	0	0	97125.7	252782	1.26172e+06	0	194383	822.601	822.601
0	PC(17:0/22:6)+HCOO	PC(39:6)+HCOO	PC	(17:0/22:6)	(17:0)	(22:6)			864.576	C48 H83 O10 N1 P1	49252.6	0	0	0	0	0	2649.89	0	0	120066	0	0	7807.71	0	3804.86	0	0	758124	0	0	12168.6	0	593.52	0	0	0	5015.67	0	299151	0	0	0	115450	382054	0	6703.98	864.576
0	PC(40:0)+H	PC(40:0)+H	PC	(40:0)	(40:0)				846.695	C48 H97 O8 N1 P1	552339	308193	0	2604.9	0	2488.59	1943.37	0	0	0	0	0	598939	419169	214782	0	312805	2.91647e+06	4687.93	142890	1.53736e+06	0	0	188814	499809	8438.09	692626	0	202781	0	0	0	290892	2.34909e+06	0	421212	846.695	846.695
0	PC(18:1/22:0)+HCOO	PC(40:1)+HCOO	PC	(18:1/22:0)	(18:1)	(22:0)			888.67	C49 H95 O10 N1 P1	1.50925e+06	1.63297e+06	0	858027	307723	874295	866920	177074	87769.6	625879	644675	1.22114e+06	2.9973e+06	2.79858e+06	1.31448e+06	818200	1.75819e+06	7.79462e+06	627673	2269.49	4.5607e+06	852242	368858	482891	1.90161e+06	2.73143e+06	2.65456e+06	85715.1	1.52255e+06	1.4254e+06	1.04249e+06	320265	1.91111e+06	8.34847e+06	196165	2.40445e+06	888.671	888.67
0	PC(40:1)+H	PC(40:1)+H	PC	(18:1/22:0)	(18:1)	(22:0)			844.679	C48 H95 O8 N1 P1	1.21254e+07	6.26485e+06	1.60824e+06	5.63539e+06	2.38346e+06	5.72509e+06	6.00429e+06	1.025e+06	1.6484e+06	3.01643e+06	2.32228e+06	6.48504e+06	1.60403e+07	1.00055e+06	5.60888e+06	2.57263e+06	7.80906e+06	4.3165e+07	3.28167e+06	4.7328e+06	2.72094e+07	4.17307e+06	2.10774e+06	4.22345e+06	8.99896e+06	1.13473e+07	1.1689e+07	827549	1.15933e+07	4.79806e+06	5.02452e+06	2.28514e+06	1.21835e+07	4.20722e+07	1.13828e+06	1.26909e+07	844.679	844.679	844.68
0	PC(18:1/22:1)+HCOO	PC(40:2)+HCOO	PC	(18:1/22:1)	(18:1)	(22:1)			886.654	C49 H93 O10 N1 P1	1.74707e+06	716691	90755.9	966896	1478.68	348507	1.0709e+06	80022.7	65561.1	483057	393481	2.00242e+06	2.90489e+06	3.5533e+06	933238	262087	207588	8.23384e+06	4728.86	476851	4.46818e+06	893117	2032.61	289906	1.51719e+06	2.05666e+06	2.19808e+06	0	2.98303e+06	898736	154413	869.469	2.23635e+06	6.30267e+06	94095.8	881908	886.654	886.654	886.654
0	PC(40:2)+H	PC(40:2)+H	PC	(18:1/22:1)	(18:1)	(22:1)			842.663	C48 H93 O8 N1 P1	1.45309e+07	7.16703e+06	2.21516e+06	6.76946e+06	2.39964e+06	5.96842e+06	6.77972e+06	2.30503e+06	2.07898e+06	6.25889e+06	3.2357e+06	7.48858e+06	1.88931e+07	1.98945e+07	7.20479e+06	3.11153e+06	1.07712e+07	7.5776e+07	3.41412e+06	7.2292e+06	3.80915e+07	6.50785e+06	2.77688e+06	4.4911e+06	9.0081e+06	1.21446e+07	1.53513e+07	1.45297e+06	1.13739e+07	5.28293e+06	4.35073e+06	1.65613e+06	1.33501e+07	5.45221e+07	1.3216e+06	1.26852e+07	842.663	842.662	842.663
0	PC(16:1p/24:2)+H	PC(40:3p)+H	PC	(16:1p/24:2)	(16:1p)	(24:2)			824.653	C48 H91 O7 N1 P1	4.63875e+06	1.32989e+06	1432.7	900172	138528	1.17651e+06	2.04103e+06	159061	2152.36	2.08053e+06	918930	3.51509e+06	4.1976e+06	4.5165e+06	1.5195e+06	801670	1.83167e+06	1.56522e+06	717575	350334	1.29053e+07	949125	423408	511600	4.42011e+06	3.92392e+06	5.81669e+06	1903.23	3.3296e+06	867483	1.14867e+06	103886	1.59914e+06	1.35931e+07	3169.66	1.44788e+06	824.653	824.653	824.653
0	PC(40:3p)+H	PC(40:3p)+H	PC	(40:3p)	(40:3p)				824.653	C48 H91 O7 N1 P1	1.10422e+07	8.06883e+06	1.60395e+06	5.06955e+06	2.85709e+06	5.27023e+06	5.376e+06	1.75892e+06	2.33078e+06	3.9085e+06	3.09231e+06	4.58569e+06	1.13647e+07	9.33183e+06	6.25006e+06	2.57018e+06	7.62768e+06	1.12178e+07	4.69424e+06	2.84666e+06	1.05121e+07	3.31912e+06	3.26234e+06	4.58143e+06	9.88322e+06	9.20984e+06	9.81577e+06	1.23168e+06	8.80632e+06	5.20624e+06	4.79753e+06	2.76192e+06	9.26546e+06	1.75999e+07	1.25029e+06	1.0346e+07	824.653	824.653	824.653
0	PC(18:0/22:4)+HCOO	PC(40:4)+HCOO	PC	(18:0/22:4)	(18:0)	(22:4)			882.623	C49 H89 O10 N1 P1	7.29622e+06	2.97687e+06	2.07605e+06	5.74128e+06	1.69791e+06	3.16782e+06	6.75875e+06	1.09843e+06	2.62323e+06	4.12176e+06	2.10794e+06	3.34458e+06	7.39825e+06	5.21789e+06	4.97895e+06	1.33394e+06	5.61256e+06	1.70461e+07	3.45402e+06	3.04036e+06	1.48993e+07	299157	1.78926e+06	1.48323e+06	4.53343e+06	4.26913e+06	8.51871e+06	236249	6.79501e+06	3.31556e+06	3.15523e+06	1.64823e+06	7.35175e+06	1.52888e+07	1.37082e+06	6.36702e+06	882.624	882.625	882.625
0	PC(40:4)+H	PC(40:4)+H	PC	(18:0/22:4)	(18:0)	(22:4)			838.632	C48 H89 O8 N1 P1	6.7693e+07	2.35525e+07	1.49452e+07	3.27583e+06	8.28094e+06	2.12903e+07	4.69128e+07	6.44644e+06	1.56943e+07	3.21756e+07	1.47187e+07	2.45717e+07	8.14882e+07	5.67305e+07	3.76217e+07	7.82844e+06	4.08759e+07	3.00866e+08	2.34539e+07	2.08033e+07	2.27839e+08	5.46995e+06	1.25733e+07	8.85205e+06	3.06312e+06	2.62092e+06	8.88182e+07	2.56182e+06	5.95432e+07	2.27439e+07	2.28874e+07	1.22368e+07	6.1068e+07	2.60582e+08	8.63655e+06	5.38892e+07	838.632	838.632	838.632
0	PC(18:0/22:5)+H	PC(40:5)+H	PC	(18:0/22:5)	(18:0)	(22:5)			836.616	C48 H87 O8 N1 P1	1.92128e+07	8.45272e+06	3.46525e+06	1.29551e+07	3.06275e+06	7.07016e+06	1.44714e+07	2.42257e+06	4.2174e+06	1.04199e+07	5.11599e+06	7.64219e+06	2.05218e+07	1.90314e+07	4.54989e+06	2.77965e+06	1.45278e+07	5.82825e+07	1.30421e+07	5.74307e+06	5.3005e+07	1.65891e+06	2.63722e+06	2.8206e+06	1.3865e+07	1.13141e+07	2.23245e+07	587732	1.46038e+07	9.12293e+06	4.25933e+06	3.95631e+06	8.17887e+06	5.37653e+07	2.90921e+06	1.9012e+07	836.616	836.616	836.616
0	PC(40:5)+H	PC(40:5)+H	PC	(40:5)	(40:5)				836.616	C48 H87 O8 N1 P1	3.5518e+06	1.08934e+06	0	1.70769e+06	0	969172	3.02547e+06	189848	718915	1.25258e+06	254586	285728	4.59323e+06	3.12557e+06	1.79403e+06	0	1.88205e+06	1.5384e+07	966489	5824.89	1.17694e+07	3901.69	240829	227437	2.35367e+06	1.78476e+06	3.814e+06	0	3.01693e+06	1.22211e+06	958381	328678	2.85544e+06	1.30498e+07	447138	2.74713e+06	836.616	836.616
0	PC(40:6)+H	PC(40:6)+H	PC	(40:6)	(40:6)				834.601	C48 H85 O8 N1 P1	1.19668e+07	4.88873e+06	2.06727e+06	7.63982e+06	1.80442e+06	4.34495e+06	9.61546e+06	1.45589e+06	4.16155e+06	9.31224e+06	2.99423e+06	6.43711e+06	1.53285e+07	1.0818e+07	5.65073e+06	1.46478e+06	9.40483e+06	3.32111e+07	5.07163e+06	4.44091e+06	3.23302e+07	1.22946e+06	2.24815e+06	2.21215e+06	9.22971e+06	7.14516e+06	1.53148e+07	327386	1.25977e+07	5.00136e+06	5.09893e+06	1.9031e+06	1.31825e+07	2.27219e+07	1.4972e+06	1.06681e+07	834.601	834.601	834.602
0	PC(18:0/22:6)+HCOO	PC(40:6)+HCOO	PC	(18:0/22:6)	(18:0)	(22:6)			878.592	C49 H85 O10 N1 P1	4.0162e+07	1.94464e+07	1.18005e+07	2.96571e+07	6.93261e+06	1.62928e+07	3.20048e+07	6.8667e+06	1.92315e+07	2.77987e+07	1.38868e+07	1.85976e+07	5.12217e+07	3.65202e+07	2.57021e+07	7.92529e+06	3.14397e+07	1.04706e+08	2.02711e+07	1.53884e+07	9.09422e+07	4.79462e+06	1.10261e+07	7.94436e+06	2.5218e+07	1.95791e+07	4.83665e+07	3.18995e+06	3.92056e+07	1.9071e+07	1.87337e+07	1.04919e+07	3.80225e+07	8.59836e+07	8.99203e+06	3.94928e+07	878.593	878.593	878.593
0	PC(40:6)+H	PC(40:6)+H	PC	(18:0/22:6)	(18:0)	(22:6)			834.601	C48 H85 O8 N1 P1	2.90785e+08	1.21194e+08	7.20715e+07	2.03097e+08	4.147e+07	9.95639e+07	2.36408e+08	4.22176e+07	1.0988e+08	2.2197e+08	8.00035e+07	1.30522e+08	3.97054e+08	2.81944e+08	1.8235e+08	4.59757e+07	2.07697e+08	1.22119e+09	1.22708e+08	1.01757e+08	9.9738e+08	3.15502e+07	6.07184e+07	5.51623e+07	1.72507e+08	1.39882e+08	3.81017e+08	1.68972e+07	3.08852e+08	1.27038e+08	1.24183e+08	6.40349e+07	2.98018e+08	8.80798e+08	5.71251e+07	2.82945e+08	834.6	834.6	834.601
0	PC(40:6e)+H	PC(40:6e)+H	PC	(40:6e)	(40:6e)				820.621	C48 H87 O7 N1 P1	6.79682e+06	4.49643e+06	304579	1.26651e+06	591658	2.61614e+06	2.28028e+06	696609	1.33762e+06	2.47867e+06	1.5838e+06	2.4811e+06	5.13253e+06	6.26973e+06	3.31673e+06	1.72e+06	2.77753e+06	1.0919e+07	1.08292e+06	308622	6.08171e+06	2.47565e+06	1.67417e+06	2.1156e+06	4.33675e+06	4.54812e+06	6.08952e+06	152677	3299578	1.66553e+06	1.25629e+06	957273	3.27931e+06	6.69958e+06	143906	4.39473e+06	820.627	820.627	820.621
0	PC(18:1/22:6)+HCOO	PC(40:7)+HCOO	PC	(18:1/22:6)	(18:1)	(22:6)			876.576	C49 H83 O10 N1 P1	1.05703e+07	4.77406e+06	2.96499e+06	7.01268e+06	1.46088e+06	4.3817e+06	8.06922e+06	2.14599e+06	4.39621e+06	7.6676e+06	3.20288e+06	5.06603e+06	1.41056e+07	1.0606e+07	6.11258e+06	1.38677e+06	7.69006e+06	2.98262e+07	5.5136e+06	4.07512e+06	2.6726e+07	955517	2.86578e+06	2.50678e+06	7.15191e+06	5.24019e+06	1.16173e+07	313485	9.73526e+06	4.36762e+06	4.52615e+06	2.92954e+06	117685	2.32302e+07	1.88211e+06	9.19285e+06	876.577	876.577	876.578
0	PC(40:7)+H	PC(40:7)+H	PC	(18:1/22:6)	(18:1)	(22:6)			832.585	C48 H83 O8 N1 P1	1.29112e+06	3.87893e+07	2.16302e+07	5.6999e+07	1.274e+07	3.08388e+07	6.25806e+07	1.37179e+07	3.11498e+07	6.13224e+07	2.2448e+07	3.89187e+07	1.25784e+08	8.95465e+07	4.82661e+07	1.21758e+07	7.0655e+07	3.37452e+08	3.95546e+07	3.10056e+07	2.63565e+08	9.90885e+06	1.80517e+07	1.43865e+07	5.00478e+07	4.23435e+07	9.81704e+07	4.48785e+06	8.57974e+07	3.6347e+07	3.9872e+07	1.94737e+07	9.005e+07	2.45753e+08	1.64534e+07	7.39651e+07	832.586	832.585	832.586
0	PC(20:3/20:4)+H	PC(40:7)+H	PC	(20:3/20:4)	(20:3)	(20:4)			832.585	C48 H83 O8 N1 P1	6.39665e+06	9.89576e+06	6.80938e+06	1.2481e+07	5.3413e+06	7.17145e+06	9.20076e+06	5.98402e+06	1.21508e+07	9.12271e+06	1.06546e+07	8.3781e+06	8.86196e+06	1.25225e+06	1.0544e+07	5.12906e+06	1.18528e+07	606837	7.71516e+06	9.72573e+06	2.87505e+06	3.1405e+06	4.64971e+06	6.4126e+06	1.26949e+07	1.26083e+07	9.01962e+06	2115021	1.15624e+07	1.1835e+07	1.15277e+07	6.43437e+06	1.41618e+07	4.98062e+06	7.38145e+06	8.28458e+06	832.585	832.585	832.585
0	PC(40:7p)+H	PC(40:7p)+H	PC	(40:7p)	(40:7p)				816.59	C48 H83 O7 N1 P1	1.1149e+06	633063	195040	690944	0	467756	839062	106974	109292	676369	117695	358186	2.16007e+06	748077	415871	0	791447	2.44194e+06	672623	66767.2	2.45e+06	0	106351	0	802379	1.03146e+06	1.68284e+06	0	1.43681e+06	543494	235578	190374	1.15671e+06	4.59249e+06	0	1.63219e+06	816.59	816.59	816.59
0	PC(40:8)+H	PC(40:8)+H	PC	(40:8)	(40:8)				830.569	C48 H81 O8 N1 P1	8.72121e+06	1.99856e+06	192529	2.33908e+06	267935	1.99732e+06	4.36756e+06	363813	1.2645e+06	4.59475e+06	2.35407e+06	330627	7.66482e+06	7.13405e+06	3.58905e+06	0	2.9488e+06	1.55251e+07	4.11732e+06	1692.62	1.34823e+07	0	1.20056e+06	483014	1.91696e+06	718251	7.04306e+06	0	4.08032e+06	342724	1.76895e+06	598593	3.7077e+06	1.11422e+07	590594	2.83225e+06	830.57	830.569	830.569
0	PC(40:8)+H	PC(40:8)+H	PC	(40:8)	(40:8)				830.569	C48 H81 O8 N1 P1	9.46962e+06	3.93597e+06	1.28272e+06	7.26387e+06	501308	2.03211e+06	7.55365e+06	183114	2.79207e+06	6.8766e+06	1.65933e+06	3.45118e+06	1.08688e+07	9.6103e+06	3.18788e+06	99941.1	7.54786e+06	1.69395e+07	2.41546e+06	2.91824e+06	1.70329e+07	380291	996211	509587	4.54255e+06	3.35817e+06	1.16149e+07	125741	1.14997e+07	4.21516e+06	2.24134e+06	1.34607e+06	1.16821e+07	2.55004e+07	1.13153e+06	7.71175e+06	830.569	830.567	830.569
0	PC(40:9)+H	PC(40:9)+H	PC	(40:9)	(40:9)				828.554	C48 H79 O8 N1 P1	5.77284e+06	9.68606e+06	5.62292e+06	2.29769e+06	2.61617e+06	1.50863e+06	4.92374e+06	805438	1.07036e+07	2.78495e+06	1.35229e+06	1.961e+06	5.61575e+06	2.40204e+07	3.37207e+06	3.44175e+06	4.68304e+06	1.53859e+07	1.07923e+07	8.61388e+06	9.70161e+06	2.46765e+06	1.31645e+06	1.21517e+06	3.22347e+06	2.47821e+06	3.08645e+07	1.3699e+06	2.70152e+07	2.38575e+06	1.63317e+06	825307	4.51573e+06	1.24793e+07	4.61469e+06	3.90224e+06	828.551	828.55	828.552
0	PC(41:1)+H	PC(41:1)+H	PC	(41:1)	(41:1)				858.695	C49 H97 O8 N1 P1	3.67728e+06	2.08413e+06	617224	2.01931e+06	1198.03	1.22778e+06	3.99299e+06	0	3250.15	1.5164e+06	447248	2.48291e+06	4.66566e+06	4.7379e+06	1.67086e+06	713373	2.71102e+06	1.4372e+07	938524	1.1907e+06	7.72079e+06	1.6964e+06	411861	977235	2.83724e+06	3.7883e+06	4.16457e+06	0	2.89811e+06	2.57457e+06	842649	588382	3.33244e+06	1.42149e+07	290876	3.10261e+06	858.695	858.695	858.695
0	PC(41:2)+H	PC(41:2)+H	PC	(41:2)	(41:2)				856.679	C49 H95 O8 N1 P1	2.85113e+06	674878	2995.89	1.63392e+06	3924.64	429052	687181	1149.24	195134	946479	189337	715979	2.40517e+06	3.35928e+06	867904	253874	2.63295e+06	9.17321e+06	6610.9	486374	4.3585e+06	369783	4047.03	308774	1.85455e+06	1.55836e+06	2.52888e+06	0	1.50986e+06	994206	128536	201972	1.97622e+06	572031	0	1.49218e+06	856.68	856.679	856.679
0	PC(18:1/24:0)+HCOO	PC(42:1)+HCOO	PC	(18:1/24:0)	(18:1)	(24:0)			916.701	C51 H99 O10 N1 P1	1.65654e+06	852828	0	739649	166766	595908	695418	143014	102963	469623	395043	1.12592e+06	2.13036e+06	1.97959e+06	792309	179192	1.04222e+06	5.65719e+06	381350	486871	3.6174e+06	316364	150034	331405	1.00474e+06	1.40126e+06	1.93555e+06	0	1.52973e+06	704468	549038	155893	1.64794e+06	5.49677e+06	94006.9	1.39055e+06	916.704	916.701
0	PC(42:1)+H	PC(42:1)+H	PC	(18:1/24:0)	(18:1)	(24:0)			872.71	C50 H99 O8 N1 P1	7.05111e+06	3.83008e+06	1.04005e+06	4.07361e+06	1.74079e+06	4.36978e+06	3.7884e+06	762860	1.54285e+06	3.54614e+06	1.87185e+06	5.59176e+06	11055912	1.20643e+07	3.66451e+06	1.95844e+06	5.53003e+06	3.12126e+07	2.49454e+06	3.45903e+06	1.89774e+07	2.75963e+06	2.02341e+06	2.89306e+06	6.56045e+06	7.45139e+06	1.08744e+07	814143	7.82798e+06	4.41839e+06	3.35649e+06	1.23277e+06	8.64549e+06	3.38112e+07	900119	9.73986e+06	872.71	872.71	872.71
0	PC(20:4/22:6)+HCOO	PC(42:10)+HCOO	PC	(20:4/22:6)	(20:4)	(22:6)			898.56	C51 H81 O10 N1 P1	970601	506703	130898	1.09277e+06	0	405749	652229	50985.8	234696	566960	114585	395867	1.47443e+06	820593	402238	0	482159	3.02126e+06	515881	652125	2.27993e+06	0	106808	101104	673282	335554	1.46393e+06	0	1.03764e+06	462361	387455	0	861684	2.46145e+06	99222.6	695470	898.56	898.56	898.56
0	PC(42:10)+H	PC(42:10)+H	PC	(20:4/22:6)	(20:4)	(22:6)			854.569	C50 H81 O8 N1 P1	9.21501e+06	3.89173e+06	2.53226e+06	7.33508e+06	1.4582e+06	4.32578e+06	6.44119e+06	1.36929e+06	3.55529e+06	5.15863e+06	2.66023e+06	3.31722e+06	9.88657e+06	7.78545e+06	5.68696e+06	1.36148e+06	5.17749e+06	2.27057e+07	4.40463e+06	4.23655e+06	1.88331e+07	753469	2.06046e+06	1.19932e+06	4.58412e+06	3.58229e+06	1.00169e+07	475963	8.91052e+06	4.25575e+06	3.34037e+06	2.30535e+06	8.05216e+06	1.96815e+07	1.5862e+06	8.88739e+06	854.569	854.569	854.569
0	PC(18:1/24:1)+HCOO	PC(42:2)+HCOO	PC	(18:1/24:1)	(18:1)	(24:1)			914.686	C51 H97 O10 N1 P1	1.26975e+06	0	0	178299	78516.1	203771	392777	2929.37	0	79777.1	179579	334735	1.17279e+06	1.27658e+06	325149	65578.8	436985	4.18359e+06	2470.06	66095.8	2.22563e+06	238410	2879.97	95493.8	618084	848150	1.71418e+06	0	536355	400738	155282	97780.2	1.27385e+06	3.52618e+06	0	556252	914.686
0	PC(42:2)+H	PC(42:2)+H	PC	(18:1/24:1)	(18:1)	(24:1)			870.695	C50 H97 O8 N1 P1	5.90791e+06	2.72238e+06	540452	2.63613e+06	1.68137e+06	3.50742e+06	3.74967e+06	574471	553430	2.07376e+06	1.26176e+06	3.68436e+06	7.70764e+06	8.4331e+06	3.02198e+06	2.05491e+06	4.21116e+06	2.82681e+07	1.23474e+06	2.15338e+06	1.27248e+07	1.95259e+06	1.29967e+06	1.27321e+06	5.52479e+06	9.02121e+06	9.3753e+06	583260	5.75139e+06	3.08988e+06	1.46111e+06	842479	5.92553e+06	2.74141e+07	384101	4.25851e+06	870.693	870.695	870.695
0	PC(42:5)+H	PC(42:5)+H	PC	(42:5)	(42:5)				864.648	C50 H91 O8 N1 P1	926301	486946	118880	549493	0	387670	872655	0	2664.09	294519	258995	535057	1.60643e+06	1.5186e+06	410005	0	895145	3.98905e+06	357045	9999.84	3.42524e+06	0	0	0	726138	813755	1.68258e+06	0	745035	527353	246044	88181.7	1.04814e+06	3.08387e+06	0	1.16631e+06	864.648	864.648	864.648
0	PC(42:6)+H	PC(42:6)+H	PC	(42:6)	(42:6)				862.632	C50 H89 O8 N1 P1	8408.58	901.245	0	164073	0	239430	238593	0	0	30356.6	0	77723.8	79661.6	356569	10350.2	0	1173.52	5.02638e+06	73841.8	0	3.02975e+06	19268.2	0	0	5656.69	5705.96	11809.6	0	235178	51564.2	3276.38	0	136385	48550.3	0	5205.36	862.632	862.632
0	PC(20:1/22:6)+HCOO	PC(42:7)+HCOO	PC	(20:1/22:6)	(20:1)	(22:6)			904.607	C51 H87 O10 N1 P1	485025	0	159610	0	103048	75335.5	560951	84323.1	311671	484620	82056.4	496955	1.21693e+06	707634	1.00375e+06	370550	860217	2.23547e+06	314249	146616	1.63186e+06	0	93708.8	0	232248	412116	640937	99710	717987	147020	281054	0	878828	2.07037e+06	0	481088	904.607		904.607
0	PC(42:7)+H	PC(42:7)+H	PC	(20:1/22:6)	(20:1)	(22:6)			860.616	C50 H87 O8 N1 P1	6.45839e+06	3.06052e+06	1.77577e+06	4.33493e+06	510405	2.76199e+06	5.00971e+06	909635	1.96759e+06	4.12395e+06	1.91165e+06	3.49197e+06	1.10714e+07	6.73731e+06	4.07948e+06	758560	5.82516e+06	3.651e+07	2.95166e+06	2.95704e+06	2.53381e+07	720381	1.40687e+06	901686	4.2795e+06	3.47178e+06	8.14113e+06	191617	6.42021e+06	3.01969e+06	2.90702e+06	1.41384e+06	7.29815e+06	2.63482e+07	1.28419e+06	6.36881e+06	860.616	860.616	860.616
0	PC(42:8)+H	PC(42:8)+H	PC	(42:8)	(42:8)				858.601	C50 H85 O8 N1 P1	1.41751e+06	253842	1726.43	5429.36	3618.53	132662	458887	2314.68	311501	757920	184806	873710	1.22336e+06	1.27231e+06	6126.14	0	933802	3.91637e+06	4989.79	269415	2.60083e+06	34761.9	3463.47	0	408564	502628	481582	0	558852	4204.61	548745	2287.79	726863	2.80494e+06	2761.45	616686	858.602	858.601	858.601
0	PC(42:9)+H	PC(42:9)+H	PC	(42:9)	(42:9)				856.585	C50 H83 O8 N1 P1	1.45367e+07	6.59475e+06	3.51166e+06	1.07889e+07	1.39151e+06	5.36994e+06	1.25713e+07	1.80264e+06	5.20518e+06	1.13485e+07	4.04695e+06	5.34611e+06	2.30462e+07	1.27865e+07	8.62426e+06	1.94348e+06	1.11434e+07	4.96731e+07	5.55398e+06	5.07083e+06	4.59025e+07	1.28185e+06	3.1297e+06	2.36812e+06	9.08051e+06	4.89909e+06	2.20142e+07	395719	1.63985e+07	6.13871e+06	5.77767e+06	3.04707e+06	1.61841e+07	4.10884e+07	2.42376e+06	1.4998e+07	856.583	856.582	856.582
0	PC(43:1)+H	PC(43:1)+H	PC	(43:1)	(43:1)				886.726	C51 H101 O8 N1 P1	427449	126695	0	169788	0	0	0	0	0	327330	0	0	684609	313388	175268	0	146842	2.31739e+06	127661	221910	848388	0	0	0	239173	183844	443000	0	317045	158024	0	0	193485	2.48026e+06	0	726520	886.726	886.726
0	PC(44:1)+H	PC(44:1)+H	PC	(44:1)	(44:1)				900.742	C52 H103 O8 N1 P1	206861	179502	0	0	0	0	135736	0	0	0	0	0	698541	940020	142525	0	5209.54	2.42434e+06	0	0	1.55364e+06	0	0	0	482064	438942	350269	0	142598	0	122648	0	163234	2.04064e+06	0	322413	900.742	900.742
0	PC(44:10)+H	PC(44:10)+H	PC	(44:10)	(44:10)				882.601	C52 H85 O8 N1 P1	884360	298075	2498.71	334284	0	134493	340089	0	0	290387	62506.8	394961	1.00368e+06	526732	232918	79447.1	328821	2.49245e+06	279720	224329	1.96353e+06	0	100203	0	401900	92948.5	916002	0	941479	223927	233037	0	492907	2.09112e+06	0	802117	882.601	882.601	882.601
0	PC(22:6/22:6)+HCOO	PC(44:12)+HCOO	PC	(22:6/22:6)	(22:6)	(22:6)			922.56	C53 H81 O10 N1 P1	1.10186e+06	247410	91357	598812	0	344391	538064	0	98029	531218	120389	218226	731337	790241	349681	0	275192	1.95664e+06	207219	1951.72	1.5824e+06	0	91942.9	0	221340	233208	922473	0	1.05838e+06	198539	302272	0	472548	1.91888e+06	0	608048	922.56	922.56	922.56
0	PC(44:12)+H	PC(44:12)+H	PC	(22:6/22:6)	(22:6)	(22:6)			878.569	C52 H81 O8 N1 P1	6.03882e+06	3.18371e+06	1.72448e+06	4.16886e+06	628719	2.42715e+06	4.37849e+06	771280	2.28518e+06	4.34393e+06	1.93314e+06	2.35915e+06	8.55333e+06	5.80404e+06	4.36783e+06	614189	3.70215e+06	1.67558e+07	3.10781e+06	2.29033e+06	1.33247e+07	450061	1.37293e+06	1.42312e+06	3.55361e+06	2.41714e+06	7.15708e+06	337296	6.61516e+06	2.60528e+06	3.13106e+06	1.30343e+06	5.11851e+06	1.22934e+07	1.33109e+06	5.89691e+06	878.568	878.569	878.57
0	PC(44:2)+H	PC(44:2)+H	PC	(44:2)	(44:2)				898.726	C52 H101 O8 N1 P1	670186	7679.44	0	0	0	0	192720	0	0	0	0	237960	787696	639200	0	0	64701.7	3.06658e+06	0	0	1.86253e+06	0	0	128966	601388	467452	1.16087e+06	0	164225	183835	113114	0	421808	3.17169e+06	0	152674	898.726	898.726
0	PC(44:3p)+H	PC(44:3p)+H	PC	(44:3p)	(44:3p)				880.715	C52 H99 O7 N1 P1	2.46188e+06	1.39033e+06	458203	3.11244e+06	519666	1.7004e+06	2.85527e+06	285842	1.07298e+06	1.85866e+06	771622	1.60745e+06	6.23965e+06	3.19842e+06	2.42119e+06	581782	2.86673e+06	1.57126e+07	1.43595e+06	1.89551e+06	1.21797e+07	961964	554997	740293	1.60905e+06	1.87525e+06	4.714e+06	0	4.91681e+06	2.00217e+06	2.00562e+06	1.24623e+06	3.88725e+06	1.3089e+07	555107	5.77081e+06	880.715	880.715	880.715
0	PC(44:4)+H	PC(44:4)+H	PC	(44:4)	(44:4)				894.695	C52 H97 O8 N1 P1	0	0	0	0	0	7954.29	0	0	0	175651	0	0	246075	276856	900.03	0	0	1.09262e+06	0	0	462319	0	0	0	0	291400	5041.24	0	208901	0	0	0	328846	3092.41	0	190651
0	PC(52:4)+H	PC(52:4)+H	PC	(52:4)	(52:4)				1006.82	C60 H113 O8 N1 P1	1.70146e+06	440428	164953	1.47286e+06	0	545010	1.12926e+06	0	0	624421	185062	688308	1.98054e+06	1.08666e+06	585887	0	1.30866e+06	6.98199e+06	573128	557092	5.37467e+06	0	218251	150702	823562	380159	2.02729e+06	0	2.26244e+06	675172	540603	0	1.76698e+06	4.29234e+06	107010	2.4446e+06	1006.82	1006.82	1006.82
0	PC(52:5)+H	PC(52:5)+H	PC	(52:5)	(52:5)				1004.8	C60 H111 O8 N1 P1	186329	0	0	3380.2	0	0	976.362	0	4387.94	0	0	1892.41	3621.03	0	147031	0	6208.68	1.06282e+06	4953.13	0	5813.13	0	0	0	3733.65	0	781956	0	174254	0	0	0	144131	1.18741e+06	0	134791	1004.8
0	PC(52:6)+H	PC(52:6)+H	PC	(52:6)	(52:6)				1002.79	C60 H109 O8 N1 P1	234490	0	0	7995.81	0	0	334071	0	0	0	0	207013	589864	217347	232770	0	143347	2.54372e+06	4535.61	0	1.09907e+06	0	0	0	0	0	691298	0	358192	0	432053	0	261113	1.20541e+06	0	705188	1002.79
0	PC(54:5)+H	PC(54:5)+H	PC	(54:5)	(54:5)				1032.84	C62 H115 O8 N1 P1	1.70302e+06	582033	107483	1.12763e+06	0	192655	1.46463e+06	0	113826	685657	340338	536264	2.07832e+06	1.30917e+06	936218	1070.65	1.36965e+06	7.41335e+06	302473	422657	6.74963e+06	0	333457	0	642239	555057	2.79535e+06	0	2.01256e+06	490352	548635	309908	1.48531e+06	6.71107e+06	320452	2.26324e+06	1032.84	1032.84	1032.84
0	PC(54:7)+H	PC(54:7)+H	PC	(54:7)	(54:7)				1028.8	C62 H111 O8 N1 P1	935112	207397	0	470942	0	0	413646	0	0	214740	0	124080	700393	520219	1891.63	0	509216	3.20801e+06	0	0	1.84837e+06	0	0	0	481404	143025	699005	0	861451	0	142589	0	499386	2.15165e+06	0	532693	1028.8	1028.8
0	PC(56:5)+H	PC(56:5)+H	PC	(56:5)	(56:5)				1060.87	C64 H119 O8 N1 P1	541095	0	0	247741	0	0	275573	0	0	0	0	0	540872	578544	244973	0	0	4.87048e+06	0	0	2.18079e+06	0	0	0	285410	245046	552310	0	526636	272464	389068	0	305620	2.72447e+06	0	636440	1060.87
0	PC(56:6)+H	PC(56:6)+H	PC	(56:6)	(56:6)				1058.85	C64 H117 O8 N1 P1	776029	0	0	326874	0	0	510166	0	216338	215202	156622	0	1.09047e+06	108408	552336	0	182693	1.27862e+06	164845	0	2.94971e+06	0	0	116329	0	0	1.112e+06	0	610054	0	157860	0	575836	2.92561e+06	0	1.69992e+06	1058.85
0	PC(58:5)+H	PC(58:5)+H	PC	(58:5)	(58:5)				1088.9	C66 H123 O8 N1 P1	455766	0	0	0	0	0	0	0	0	0	0	0	1.06844e+06	211013	0	0	0	3.28081e+06	0	0	1.43575e+06	0	0	0	281353	0	170602	0	605738	0	0	0	0	1.58153e+06	0	155980	1088.9
0	PC(58:7)+H	PC(58:7)+H	PC	(58:7)	(58:7)				1084.87	C66 H119 O8 N1 P1	169302	0	0	0	0	0	166787	0	0	0	0	0	206021	0	0	0	0	1.77381e+06	0	0	936762	0	0	0	0	0	615155	0	0	0	889.378	0	0	1.78808e+06	0	315421	1084.87
0	PE(16:0e)+H	PE(16:0e)+H	PE	(16:0e)	(16:0e)				454.293	C21 H45 O7 N1 P1	1.21749e+07	6.57516e+06	3.50942e+06	6.64313e+06	3.25882e+06	2.63749e+06	8.14928e+06	1.97112e+06	3.67275e+06	5.65095e+06	4.48075e+06	2.94904e+06	5.10586e+06	7.27453e+06	3.43884e+06	1.31786e+06	5.77329e+06	1.30361e+07	5.63138e+06	4.13562e+06	1.24747e+07	1.49404e+06	1.50359e+06	2.21108e+06	3.20603e+06	4.25681e+06	5.69714e+06	1.08502e+06	1.08029e+07	3.72816e+06	6.16766e+06	2.01453e+06	4.61656e+06	1.04389e+07	3.66838e+06	4.10982e+06	454.293	454.293	454.293
0	PE(18:0e)+H	PE(18:0e)+H	PE	(18:0e)	(18:0e)				482.324	C23 H49 O7 N1 P1	2.95747e+07	1.27888e+07	8.48061e+06	1.70496e+07	7.48089e+06	5.425e+06	2.22013e+07	3.7956e+06	7.44588e+06	1.26631e+07	1.20212e+07	5.78379e+06	1.46265e+07	2.70126e+06	7.7826e+06	2.32818e+06	1.31707e+07	3.92022e+07	9.47051e+06	6.92787e+06	3.83822e+07	2.36169e+06	3.03259e+06	3.25071e+06	9.3809e+06	1.05911e+07	1.71552e+07	1.17415e+06	3.20544e+07	1.10747e+07	1.70946e+07	3.9898e+06	1.385e+07	3.54554e+07	8.032e+06	1.59962e+07	482.324	482.324	482.324
0	PE(18:0p)+H	PE(18:0p)+H	PE	(18:0p)	(18:0p)				480.308	C23 H47 O7 N1 P1	4.5183e+07	2.95975e+07	8.30662e+06	1.61193e+07	9.91425e+06	9.38519e+06	1.43789e+07	7.72918e+06	8.2247e+06	1.79965e+07	1.80661e+07	1.61391e+07	1.99399e+07	2.67147e+07	9.05872e+06	9.14149e+06	2.34587e+07	4.83661e+07	1.19481e+07	9.0446e+06	2.25872e+07	8.84268e+06	4.97144e+06	2.63619e+06	1.74191e+07	2.60908e+07	2.82817e+07	5.05321e+06	2.3528e+07	1.70813e+07	1.52043e+07	4.67331e+06	9.26346e+06	1.64142e+07	7.03317e+06	1.05819e+07	480.309	480.308	480.309
0	PE(19:1)+H	PE(19:1)+H	PE	(19:1)	(19:1)				508.303	C24 H47 O8 N1 P1	0	0	0	0	0	1.7089e+06	18658.4	4588.17	0	0	0	228430	8.1475e+06	0	706240	55082.8	0	6.16127e+06	0	0	86402	0	1.18296e+06	3.6422e+06	0	0	554446	0	0	0	0	2.10579e+06	0	3.13485e+06	0	1.04423e+06
0	PE(20:0p)+H	PE(20:0p)+H	PE	(20:0p)	(20:0p)				508.34	C25 H51 O7 N1 P1	1.57153e+07	1.03151e+07	2.42974e+06	4.53556e+06	5777.03	2.9111e+06	81688.6	2.74989e+06	2.0264e+06	5.57475e+06	5.34313e+06	6.85578e+06	6.66471e+06	9.48739e+06	3.17786e+06	4.18755e+06	3.43993e+06	1.6288e+07	84656.2	3.75389e+06	7.21097e+06	4.1306e+06	1.71726e+06	2.28391e+06	3.63955e+06	4.24751e+06	1.07415e+07	1.87797e+06	7.46895e+06	5.61166e+06	4.51246e+06	1.41198e+06	2.53185e+06	9.03833e+06	2442.95	5.50343e+06	508.34	508.34	508.34
0	PE(20:3e)+H	PE(20:3e)+H	PE	(20:3e)	(20:3e)				504.308	C25 H47 O7 N1 P1	1694.9	1818.11	0	0	0	132936	5817.97	0	0	0	0	599851	762836	106778	304.467	60063.8	1296.31	2.30542e+06	0	66.006	825036	41561.6	1066.32	2242.49	157065	171120	1.77777e+06	1134.11	41155.3	1455.51	0	154.146	58849.2	1.05395e+06	0	578772	504.308	504.308
0	PE(20:3e)+H	PE(20:3e)+H	PE	(20:3e)	(20:3e)				504.308	C25 H47 O7 N1 P1	1.3563e+06	406470	326204	895858	276365	240019	1.29042e+06	0	85137.2	84750.1	313784	64112.8	698713	864283	657323	0	437501	855375	293808	144351	2.4653e+06	11914.9	469.297	0	114830	208111	785733	0	1.53102e+06	504712	252460	0	1.00942e+06	1.82923e+06	338366	579202	504.305	504.308	504.308
0	PE(20:4e)+H	PE(20:4e)+H	PE	(20:4e)	(20:4e)				502.293	C25 H45 O7 N1 P1	1.00872e+07	5.46999e+06	1.79665e+06	3.98768e+06	1.67191e+06	6.67548e+06	4.11681e+06	2.1318e+06	3.73024e+06	7.26338e+06	3.63864e+06	1.24368e+07	1.38194e+07	5.44773e+06	9.0265e+06	7.2879e+06	8.24793e+06	3.03801e+07	2.70424e+06	4.24046e+06	1.67046e+07	3.57275e+06	4.9338e+06	3.34759e+06	6.14177e+06	5.33446e+06	2.39249e+07	3.21877e+06	5.70675e+06	3.82073e+06	3.00116e+06	4.86469e+06	4.66384e+06	1.55996e+07	1.8096e+06	9.95382e+06	502.293	502.293	502.293
0	PE(21:1)+H	PE(21:1)+H	PE	(21:1)	(21:1)				536.335	C26 H51 O8 N1 P1	0	0	0	0	0	274326	0	0	0	0	508.379	54763.6	86704.1	0	51687.8	58851.7	26283.1	2.55546e+06	0	0	0	0	287956	1.40677e+06	0	0	168048	0	0	0	0	40327.4	0	781233	0	245198
0	PE(21:4)+H	PE(21:4)+H	PE	(21:4)	(21:4)				530.288	C26 H45 O8 N1 P1	0	0	0	0	0	1.18079e+06	0	0	0	0	0	77875.6	4.73553e+06	0	344751	0	0	3.4391e+06	0	0	1080.38	51702.2	1.14414e+06	2.26078e+06	0	0	261816	0	0	0	0	1.74115e+06	0	1.18781e+06	0	313988
0	PE(22:4e)+H	PE(22:4e)+H	PE	(22:4e)	(22:4e)				530.324	C27 H49 O7 N1 P1	3.30862e+06	1.90577e+06	4.87776e+06	2.3262e+06	3.78705e+06	4.15246e+06	7.39898e+06	3.2546e+06	3.28428e+06	2.28119e+06	6.95389e+06	6.22897e+06	7.80434e+06	7.22014e+06	5.02618e+06	4.06473e+06	9.39623e+06	1.93499e+07	1.64718e+06	2.96221e+06	8.64589e+06	1.81769e+06	2.03523e+06	2.0416e+06	3.53509e+06	7.95328e+06	1.58857e+07	2.06182e+06	2.17399e+06	2.00098e+06	5.9677e+06	2.56649e+06	2.80101e+06	1.02742e+07	4.09363e+06	7.47122e+06	530.325	530.325	530.325
0	PE(23:4)+H	PE(23:4)+H	PE	(23:4)	(23:4)				558.319	C28 H49 O8 N1 P1	0	0	0	0	0	651822	0	0	0	0	0	51197.8	2.60222e+06	0	90610	60089.9	0	2.48208e+06	0	0	0	0	307435	1.24717e+06	0	0	320703	0	0	0	0	1.14498e+06	0	827507	0	180559
0	PE(16:0/16:0)-H	PE(32:0)-H	PE	(16:0/16:0)	(16:0)	(16:0)			690.508	C37 H73 O8 N1 P1	6921.72	6547.58	1593.12	3057.73	4121.94	570389	4732.72	2259.22	2354.86	12549.2	2990.87	6200.13	2.75012e+06	7762.15	7883.56	2806.07	1.08753e+06	5.68548e+06	833228	1115.55	5.63839e+06	2908.15	1776.8	3192.11	5918.33	1689.08	2.02401e+06	0	11078.9	4578.01	5372.23	785250	8490.23	4.12493e+06	2871.31	5630.95	690.508	690.508	690.508
0	PE(16:0/16:0)+H	PE(32:0)+H	PE	(16:0/16:0)	(16:0)	(16:0)			692.522	C37 H75 O8 N1 P1	3.45884e+06	2.3073e+06	711367	2.61589e+06	626915	3.18282e+06	230617	129728	396948	2.45526e+06	400844	1.32248e+06	1.62499e+07	1.07294e+07	3.80446e+06	4.80691e+06	4.48498e+06	3.88555e+07	1.0895e+06	148071	5.26051e+07	2.0054e+06	2.99573e+06	4.75543e+06	2.47499e+06	1.53477e+07	2.86201e+06	970076	4.54101e+06	1.26933e+06	2.77621e+06	2.71456e+06	2.43932e+06	4.50021e+07	810068	1.33652e+06	692.522	692.522	692.522
0	PE(16:0p/16:0)-H	PE(32:0p)-H	PE	(16:0p/16:0)	(16:0p)	(16:0)			674.513	C37 H73 O7 N1 P1	2.71852e+06	1.41936e+06	402776	1.66858e+06	456720	1.02214e+06	3.44214e+06	309436	1.16472e+06	1.93928e+06	944580	1.66619e+06	4.67535e+06	3.37596e+06	2.02724e+06	697620	2.09427e+06	9.56991e+06	1.41939e+06	1.93286e+06	9.13585e+06	82540.9	1.29404e+06	742575	2.33407e+06	1.13234e+06	3.08027e+06	729.821	2.27696e+06	1.83518e+06	1.08368e+06	92196.8	2.88704e+06	7.49674e+06	151119	2.65746e+06	674.513	674.514	674.513
0	PE(16:0p/16:0)+H	PE(32:0p)+H	PE	(16:0p/16:0)	(16:0p)	(16:0)			676.528	C37 H75 O7 N1 P1	3.54516e+06	1.3513e+06	492581	1.70527e+06	152014	608086	3.90033e+06	170591	1.06721e+06	1.95224e+06	788715	1.95145e+06	4.9814e+06	3.26092e+06	3.17404e+06	4722.76	2.88763e+06	1.24931e+07	1.81219e+06	857568	1.20747e+07	389108	1.12194e+06	746278	3.21596e+06	1.72468e+06	5.46405e+06	0	2.82847e+06	1.28966e+06	1.52021e+06	752242	3.3448e+06	8.47917e+06	316968	3.75127e+06	676.527	676.528	676.528
0	PE(18:1p/14:0)-H	PE(32:1p)-H	PE	(18:1p/14:0)	(18:1p)	(14:0)			672.497	C37 H71 O7 N1 P1	1.80578e+06	222802	0	465415	0	3766.94	736926	0	1764.64	164104	3673.61	1.16459e+06	1.81721e+06	2.20773e+06	6037.62	71680.1	177256	6.35273e+06	1103.4	300208	3.39236e+06	247409	2872.93	6820.22	140388	953518	2.02434e+06	0	882689	5029.54	496987	0	1.48041e+06	4.89695e+06	71307.9	162226	672.499	672.497
0	PE(18:1p/14:0)+H	PE(32:1p)+H	PE	(18:1p/14:0)	(18:1p)	(14:0)			674.512	C37 H73 O7 N1 P1	1.33403e+06	1.29297e+06	5671.57	3022.85	3306.05	751095	854681	0	1543.88	609786	3974.9	817644	4.33559e+06	3.90503e+06	692692	113065	2.77145e+06	1.01417e+07	393510	207796	5.24396e+06	117697	1982.14	113772	1.42094e+06	1.10809e+06	1.38605e+06	0	1.05185e+06	7632.58	0	81611.6	1.97948e+06	9.70919e+06	0	628080	674.513	674.512	674.512
0	PE(18:0/16:0)+H	PE(34:0)+H	PE	(18:0/16:0)	(18:0)	(16:0)			720.554	C39 H79 O8 N1 P1	2.3947e+06	3.22206e+06	656550	4.64786e+06	1.6899e+06	1.50666e+06	4.47301e+06	1.2795e+06	194481	941728	423822	1.88893e+06	2.10547e+07	4.38152e+06	9.6847e+06	7.56396e+06	8.81223e+06	3.9891e+07	8.14188e+06	655033	2.278e+07	1.14624e+06	2.1807e+06	2.23107e+06	1.01361e+07	8.94196e+06	1.25083e+07	1.86141e+06	1.10333e+07	976735	176575	5.5591e+06	7.14764e+06	3.47541e+07	1.42895e+06	1.46115e+07	720.554	720.554	720.554
0	PE(18:0/16:0)-H	PE(34:0)-H	PE	(18:0/16:0)	(18:0)	(16:0)			718.539	C39 H77 O8 N1 P1	4.49679e+06	1.8159e+06	1917.18	3.17838e+06	10165.8	1.67288e+06	3.76807e+06	550435	2.01575e+06	3.40825e+06	1.28407e+06	2.08595e+06	6.09795e+06	4.07808e+06	3.36853e+06	877531	9841.08	1.3235e+07	2.1596e+06	1.95848e+06	1.20232e+07	503331	1.09336e+06	5486.31	2.11183e+06	6984.39	5660.39	1807.46	4.1221e+06	2.08493e+06	2.03068e+06	1833.76	4.96787e+06	1.05741e+07	2891.96	6.02765e+06	718.54	718.54	718.539
1	PE(16:0p/18:0)+H	PE(34:0p)+H	PE	(16:0p/18:0)	(16:0p)	(18:0)			704.559	C39 H79 O7 N1 P1	9.88583e+06	5.03097e+06	2.13086e+06	7.8566e+06	1.72709e+06	3.9762e+06	4.81054e+06	2.50963e+06	2.08407e+06	5.22655e+06	2.83483e+06	4.21227e+06	1.05144e+07	1.07388e+07	4.58072e+06	1.80434e+06	5.44998e+06	4.02001e+07	5.5692e+06	5.17276e+06	2.14083e+07	2.17893e+06	304727	2.33647e+06	7.63644e+06	7.11443e+06	8.03917e+06	103385	7.50426e+06	4.32819e+06	3.15523e+06	1.11117e+06	9.50262e+06	2.63982e+07	477400	1.20626e+07	704.559	704.559	704.559
0	PE(18:0p/16:0)-H	PE(34:0p)-H	PE	(18:0p/16:0)	(18:0p)	(16:0)			702.544	C39 H77 O7 N1 P1	7.99195e+06	4.02198e+06	1.49745e+06	4.22875e+06	1.12463e+06	3.0819e+06	5.4228e+06	855829	2.7391e+06	4.2714e+06	1.62353e+06	2.29414e+06	7.81441e+06	5.97028e+06	4.39398e+06	989406	3.80283e+06	1.82529e+07	3.23614e+06	2.48684e+06	1.70742e+07	1.25737e+06	1.85722e+06	1.38065e+06	4.55127e+06	3.2542e+06	8.44986e+06	422661	6.04938e+06	2.74663e+06	2.95198e+06	2.40376e+06	6.92946e+06	1.6811e+07	1.19694e+06	6.58701e+06	702.545	702.546	702.544
0	PE(18:0p/16:0)+H	PE(34:0p)+H	PE	(18:0p/16:0)	(18:0p)	(16:0)			704.559	C39 H79 O7 N1 P1	8.46093e+06	4.56967e+06	1.3318e+06	5.2092e+06	1.26964e+06	2.92151e+06	5.18512e+06	904963	2.33098e+06	5.28253e+06	2.65871e+06	3.06834e+06	9.48162e+06	5.89023e+06	4.45801e+06	1.67426e+06	4.47998e+06	2.73556e+07	3.82919e+06	3.01557e+06	2.12445e+07	622893	420143	1.73586e+06	4.95629e+06	4.75899e+06	9.59902e+06	445376	8.21969e+06	3.33017e+06	3.24315e+06	2.86879e+06	7.59e+06	2.3143e+07	1.3182e+06	8.62706e+06	704.559	704.559	704.559
0	PE(16:0/18:1)+H	PE(34:1)+H	PE	(16:0/18:1)	(16:0)	(18:1)			718.538	C39 H77 O8 N1 P1	7.78642e+07	3.86974e+07	1.30723e+07	4.77515e+07	1.20671e+07	3.2596e+07	5.76026e+07	1.31562e+07	2.70887e+07	5.36717e+07	2.12967e+07	4.19836e+07	1.01218e+08	8.56684e+07	4.46901e+07	1.62819e+07	5.53874e+07	2.95276e+08	3.08161e+07	2.81887e+07	2.17981e+08	1.7073e+07	1.86682e+07	1.77138e+07	4.98532e+07	4.67453e+07	8.91199e+07	5.3338e+06	6.8157e+07	3.55791e+07	2.83223e+07	1.7423e+07	6.82569e+07	2.18349e+08	1.16031e+07	6.96498e+07	718.538	718.538	718.538
0	PE(16:0/18:1)-H	PE(34:1)-H	PE	(16:0/18:1)	(16:0)	(18:1)			716.524	C39 H75 O8 N1 P1	4.83597e+07	2.86397e+07	1.15805e+07	3.17455e+07	9.40879e+06	2.35959e+07	4.13862e+07	9.50877e+06	1.9908e+07	3.79525e+07	1.49274e+07	3.01461e+07	6.23327e+07	5.56812e+07	2.90211e+07	1.17529e+07	3.85922e+07	1.36089e+08	2.17617e+07	1.9076e+07	1.09524e+08	1.27894e+07	1.29013e+07	1.24517e+07	3.53453e+07	3.29679e+07	5.34071e+07	5.13237e+06	4.8169e+07	2.60471e+07	1.94863e+07	1.30069e+07	4.58079e+07	1.1499e+08	7.9692e+06	4.3592e+07	716.525	716.524	716.525
0	PE(16:0e/18:1)-H	PE(34:1e)-H	PE	(16:0e/18:1)	(16:0e)	(18:1)			702.544	C39 H77 O7 N1 P1	8.83508e+06	4.01336e+06	103874	2.34052e+06	385981	3.07663e+06	7.90119e+06	376477	2.88758e+06	1.92804e+06	1.05529e+06	3.45945e+06	1.16728e+07	9.04328e+06	3.21485e+06	1.35376e+06	3.54344e+06	2.01018e+07	4.51442e+06	1.40067e+06	1.55118e+07	1.67216e+06	951609	1.57459e+06	5.56494e+06	4.93112e+06	6.97078e+06	702454	5.99123e+06	2.66964e+06	11054.4	868308	9.35423e+06	1.8175e+07	99289.6	7.87394e+06	702.544	702.544	702.544
0	PE(34:1e)+H	PE(34:1e)+H	PE	(16:0e/18:1)	(16:0e)	(18:1)			704.559	C39 H79 O7 N1 P1	8.13406e+06	4.47675e+06	969861	7.8566e+06	1.84687e+06	4.16315e+06	4.46302e+06	949149	1.52425e+06	4.14532e+06	1.54448e+06	4.69039e+06	9.29969e+06	9.00896e+06	3.89718e+06	1.67693e+06	4.21137e+06	2.36053e+07	1.22158e+06	2.22118e+06	1.99942e+07	2.54227e+06	1.13439e+06	1.74657e+06	5.92239e+06	7.53985e+06	6.99769e+06	652700	6.66549e+06	4.49079e+06	2.34985e+06	1.11117e+06	5.0143e+06	2.23351e+07	553097	1.20265e+07	704.559	704.559	704.559
0	PE(16:0p/18:1)-H	PE(34:1p)-H	PE	(16:0p/18:1)	(16:0p)	(18:1)			700.529	C39 H75 O7 N1 P1	9.89646e+07	5.47373e+07	1.29553e+07	4.31017e+07	1.5956e+07	4.5918e+07	4.75942e+07	1.2462e+07	2.0912e+07	4.44111e+07	1.98668e+07	4.44705e+07	9.46906e+07	1.00761e+08	4.30205e+07	2.12152e+07	5.58629e+07	2.66997e+08	2.63309e+07	2.61929e+07	1.98634e+08	3.10458e+07	1.97198e+07	2.77165e+07	6.83853e+07	7.96056e+07	9.55942e+07	9.53897e+06	7.05481e+07	4.71956e+07	2.88346e+07	1.57056e+07	7.72182e+07	2.25096e+08	7.10283e+06	6.45805e+07	700.529	700.53	700.53
0	PE(16:0p/18:1)+H	PE(34:1p)+H	PE	(16:0p/18:1)	(16:0p)	(18:1)			702.543	C39 H77 O7 N1 P1	1.29393e+08	7.35524e+07	1.628e+07	5.52369e+07	2.03348e+07	5.69592e+07	6.07797e+07	1.60248e+07	2.60884e+07	5.52169e+07	2.66765e+07	6.02939e+07	1.24936e+08	1.35326e+08	5.66583e+07	2.63827e+07	7.38486e+07	4.05746e+08	3.58297e+07	3.58897e+07	2.89592e+08	4.10961e+07	2.45492e+07	3.34088e+07	8.87957e+07	1.0755e+08	1.22546e+08	1.29449e+07	9.67562e+07	5.90667e+07	3.52579e+07	2.11418e+07	1.01897e+08	3.43668e+08	1.01492e+07	8.98645e+07	702.543	702.543	702.543
0	PE(16:0/18:2)+H	PE(34:2)+H	PE	(16:0/18:2)	(16:0)	(18:2)			716.522	C39 H75 O8 N1 P1	2.76661e+06	1.97707e+06	1800.08	1.85554e+06	1558.48	778702	2.31688e+06	482042	233744	1.29637e+06	653309	1.8053e+06	3.27136e+06	2.40932e+06	5092.64	152211	1.55751e+06	9.46838e+06	974.685	771197	7.7653e+06	542313	1092.28	1559.73	311944	1.19489e+06	3.31723e+06	1251.28	2.36644e+06	8428.72	531344	1737.46	9902.17	6.27391e+06	232.607	2.34147e+06	716.522	716.522	716.522
0	PE(16:0/18:2)-H	PE(34:2)-H	PE	(16:0/18:2)	(16:0)	(18:2)			714.508	C39 H73 O8 N1 P1	6368.03	902179	0	980.343	4321	507640	1.2382e+06	101478	203435	1.13825e+06	14005.1	850299	1.62132e+06	1.73216e+06	585782	192360	1.17688e+06	4.7663e+06	8127.87	589172	2.5951e+06	209119	5597.24	174932	831204	267539	1.84921e+06	68978.1	9007.52	7251.76	4107.21	2289.25	919571	3.37549e+06	1553.49	1.08176e+06	714.508	714.508
0	PE(18:1p/16:1)-H	PE(34:2p)-H	PE	(18:1p/16:1)	(18:1p)	(16:1)			698.513	C39 H73 O7 N1 P1	4.36474e+06	1.91506e+06	193565	1.44968e+06	246720	2.05468e+06	2.59162e+06	86719.8	572707	1.60167e+06	1.08303e+06	2.1997e+06	5.23956e+06	5.26684e+06	1.77331e+06	359425	2.69332e+06	1.35826e+07	1.06498e+06	963796	8.73549e+06	1.43315e+06	860066	1.22751e+06	2.46669e+06	3.1826e+06	4.0236e+06	123527	2.83001e+06	1.7431e+06	773113	387982	3.7615e+06	1.01101e+07	113090	2.69227e+06	698.515	698.514	698.513
0	PE(18:1p/16:1)+H	PE(34:2p)+H	PE	(18:1p/16:1)	(18:1p)	(16:1)			700.528	C39 H75 O7 N1 P1	5.66165e+06	2.23345e+06	3933.63	2.32603e+06	180363	2.32969e+06	2.29294e+06	419205	924531	2.55069e+06	1.53024e+06	2.22455e+06	6.31053e+06	7.25827e+06	2.43537e+06	871039	4.82192e+06	2.31452e+07	2.0131e+06	1.08809e+06	1.54035e+07	1.89093e+06	657439	689423	4.18159e+06	4.50979e+06	5.5926e+06	78575.6	4.95659e+06	3.10544e+06	1.6417e+06	488623	5.4872e+06	1.67206e+07	0	3.56386e+06	700.527	700.527	700.528
0	PE(34:3)+H	PE(34:3)+H	PE	(34:3)	(34:3)				714.507	C39 H73 O8 N1 P1	2.02338e+06	724301	3088.01	818430	0	1.2092e+06	305165	87106.1	985638	916513	93603.1	1.24906e+06	3.23942e+06	1.47037e+06	652298	1.11564e+06	1.52059e+06	7.17826e+06	279315	911797	5.6683e+06	422749	3281.86	787285	2.33736e+06	673324	3.696e+06	3573.08	556575	1.55333e+06	460317	377007	899921	4.77483e+06	0	2.53436e+06	714.507	714.507	714.507
0	PE(18:0p/17:1)+H	PE(35:1p)+H	PE	(18:0p/17:1)	(18:0p)	(17:1)			716.559	C40 H79 O7 N1 P1	7.03965e+06	3.79493e+06	187074	2.19908e+06	250604	2.2194e+06	1.98575e+06	691352	1.09374e+06	2.05287e+06	196223	1.9646e+06	5.02794e+06	4.79215e+06	2.25006e+06	1.34754e+06	2.81976e+06	2.01602e+07	986767	428260	1.19746e+07	955085	457509	717318	4.09564e+06	4.73783e+06	4.31639e+06	111777	4.54247e+06	2.73917e+06	1.37046e+06	499123	3.97176e+06	1.70097e+07	0	3.93128e+06	716.559	716.558	716.559
0	PE(18:1p/17:1)-H	PE(35:2p)-H	PE	(18:1p/17:1)	(18:1p)	(17:1)			712.529	C40 H75 O7 N1 P1	589686	172785	0	164773	0	0	0	0	0	0	0	0	235633	421742	4097.34	0	0	921984	0	0	742241	0	0	0	182664	234647	649924	0	171221	0	0	0	0	1.43206e+06	0	246776	712.529	712.529
0	PE(16:0p/20:0)-H	PE(36:0p)-H	PE	(16:0p/20:0)	(16:0p)	(20:0)			730.576	C41 H81 O7 N1 P1	407365	191621	0	0	0	5605.15	123438	0	0	119373	0	2209.55	280150	403900	0	0	154904	1.09062e+06	0	0	1.30841e+06	0	0	0	0	117097	271310	0	272608	0	0	0	112046	1.20145e+06	0	454141	730.576	730.576
0	PE(18:0/18:1)+H	PE(36:1)+H	PE	(18:0/18:1)	(18:0)	(18:1)			746.569	C41 H81 O8 N1 P1	1.23344e+08	6.01874e+07	2.01e+07	6.01029e+07	2.00932e+07	5.44859e+07	6.98501e+07	1.68163e+07	3.42892e+07	6.46818e+07	3.02348e+07	6.04098e+07	1.36133e+08	1.25901e+08	6.42241e+07	2.75035e+07	8.13585e+07	4.52474e+08	4.20656e+07	4.05615e+07	2.89231e+08	3.4106e+07	2.98111e+07	3.646e+07	8.40139e+07	8.54397e+07	1.20651e+08	1.10287e+07	9.94916e+07	5.41403e+07	3.90367e+07	2.33253e+07	9.71924e+07	3.43569e+08	1.38822e+07	9.647e+07	746.57	746.569	746.569
0	PE(18:0/18:1)-H	PE(36:1)-H	PE	(18:0/18:1)	(18:0)	(18:1)			744.555	C41 H79 O8 N1 P1	1.00522e+08	5.10427e+07	1.77954e+07	4.77128e+07	1.8396e+07	4.56366e+07	6.45608e+07	1.41083e+07	3.02144e+07	5.32244e+07	2.82106e+07	5.08767e+07	1.113e+08	1.09702e+08	5.83121e+07	2.42201e+07	7.01472e+07	3.0042e+08	3.56559e+07	3.57998e+07	2.22682e+08	2.9202e+07	2.54277e+07	2.97984e+07	7.23889e+07	7.60403e+07	1.04848e+08	9.3683e+06	8.37318e+07	4.92615e+07	3.48977e+07	2.10394e+07	8.26352e+07	2.43051e+08	1.20674e+07	7.95637e+07	744.556	744.556	744.556
0	PE(18:0e/18:1)-H	PE(36:1e)-H	PE	(18:0e/18:1)	(18:0e)	(18:1)			730.576	C41 H81 O7 N1 P1	2.03133e+07	8.0604e+06	96618.1	5.35734e+06	14547.4	6.53346e+06	7.26869e+06	1640.58	952681	6.23899e+06	18072.6	7.38739e+06	1.95914e+07	2.00767e+07	51351	2.2238e+06	5.64061e+06	6.68864e+07	34717.4	2.67972e+06	4.18112e+07	4.66486e+06	1.40197e+06	1.94649e+06	1.82232e+07	1.78971e+07	1.85087e+07	295837	1.6192e+07	82102.8	2.11507e+06	13424.4	1.97805e+07	4.66389e+07	76793.3	1.04442e+07	730.576	730.576	730.576
0	PE(36:1e)+H	PE(36:1e)+H	PE	(18:0e/18:1)	(18:0e)	(18:1)			732.59	C41 H83 O7 N1 P1	1.69751e+07	1.42314e+07	2.4329e+06	1.52823e+07	142458	1.08989e+07	7.18697e+06	1.63894e+06	4.13992e+06	6.03897e+06	4.26132e+06	1.48622e+07	3.14637e+07	1.80329e+07	1.09696e+07	1.31281e+06	1.91859e+07	9.32422e+07	3.39902e+06	5.06082e+06	6.11234e+07	1.17109e+07	1.90718e+06	7.56905e+06	2.18102e+07	2.23954e+07	1.74278e+07	8594.66	2.96359e+07	1.37813e+07	1.09002e+07	85687	2.0179e+07	1.05094e+08	1.0323e+06	2.66847e+07	732.59	732.59	732.59
0	PE(18:0p/18:1)-H	PE(36:1p)-H	PE	(18:0p/18:1)	(18:0p)	(18:1)			728.56	C41 H79 O7 N1 P1	1.37313e+07	8.77573e+06	1.57645e+06	6.61675e+06	2.01053e+06	8.05092e+06	7.2073e+06	1.29667e+06	4.29155e+06	6.15274e+06	2.64463e+06	6.13555e+06	1.94323e+07	1.46787e+07	7.71786e+06	3.47538e+06	1.21038e+07	7.3674e+07	5.23836e+06	5.40016e+06	4.51022e+07	6.98937e+06	3.30584e+06	4.69622e+06	8.155e+06	1.73422e+07	1.30388e+07	2.37453e+06	1.08599e+07	8.71328e+06	3.41052e+06	4.21675e+06	1.05293e+07	3.64658e+07	683667	1.32454e+07	728.56	728.56	728.56
0	PE(18:0p/18:1)-H	PE(36:1p)-H	PE	(18:0p/18:1)	(18:0p)	(18:1)			728.56	C41 H79 O7 N1 P1	2.61473e+08	1.53786e+08	3.70982e+07	1.35091e+08	3.33464e+07	9.05068e+07	1.18321e+08	2.95508e+07	4.33227e+07	1.12798e+08	4.91289e+07	1.23862e+08	2.61225e+08	2.74084e+08	1.0778e+08	4.78783e+07	1.76405e+08	7.12678e+08	5.17434e+07	6.39605e+07	4.99031e+08	1.00986e+08	3.78463e+07	6.07924e+07	1.89891e+08	2.30059e+08	2.39525e+08	1.78333e+07	2.19846e+08	1.2695e+08	7.57286e+07	3.47799e+07	2.54708e+08	6.62799e+08	2.0055e+07	2.16541e+08	728.561	728.561	728.561
0	PE(18:0p/18:1)+H	PE(36:1p)+H	PE	(18:0p/18:1)	(18:0p)	(18:1)			730.575	C41 H81 O7 N1 P1	4.4258e+08	2.33175e+08	5.53306e+07	2.01721e+08	4.28787e+07	1.34627e+08	1.77218e+08	4.57102e+07	6.87496e+07	1.63034e+08	6.91364e+07	1.98877e+08	4.369e+08	4.60929e+08	1.69977e+08	7.3811e+07	2.57547e+08	1.39361e+09	7.42525e+07	1.0391e+08	9.35519e+08	1.49288e+08	5.64894e+07	1.05261e+08	3.0509e+08	3.73658e+08	3.91344e+08	2.58567e+07	3.37221e+08	2.08768e+08	1.13097e+08	5.14919e+07	3.84392e+08	1.24924e+09	3.11775e+07	3.37252e+08	730.574	730.574	730.574
0	PE(18:0p/18:1)+H	PE(36:1p)+H	PE	(18:0p/18:1)	(18:0p)	(18:1)			730.575	C41 H81 O7 N1 P1	953464	273009	0	0	0	0	5142.08	0	0	0	0	0	610768	339556	0	0	176771	2.09041e+06	0	0	2.86362e+06	0	0	0	0	683274	704411	0	183881	204976	0	0	583552	4.2047e+06	0	491074	730.575	730.575
0	PE(18:1/18:1)+H	PE(36:2)+H	PE	(18:1/18:1)	(18:1)	(18:1)			744.554	C41 H79 O8 N1 P1	8.42407e+07	4.66912e+07	1.4521e+07	5.20491e+07	1.19068e+07	3.36825e+07	5.76105e+07	1.5664e+07	2.49835e+07	6.15877e+07	2.06288e+07	4.85859e+07	1.05234e+08	9.95192e+07	4.13628e+07	1.57778e+07	5.75115e+07	2.91591e+08	3.11253e+07	2.76291e+07	2.05905e+08	2.3553e+07	1.67975e+07	1.73509e+07	5.47064e+07	5.0921e+07	7.92185e+07	6.94703e+06	6.414e+07	3.60623e+07	2.55894e+07	1.56366e+07	7.0108e+07	2.13906e+08	9.14303e+06	6.8218e+07	744.553	744.553	744.554
0	PE(18:1/18:1)-H	PE(36:2)-H	PE	(18:1/18:1)	(18:1)	(18:1)			742.539	C41 H77 O8 N1 P1	5.4372e+07	3.22764e+07	1.09127e+07	3.4582e+07	8.44405e+06	2.5491e+07	4.03859e+07	1.18165e+07	1.75924e+07	4.2364e+07	1.69867e+07	3.33335e+07	6.30291e+07	6.10596e+07	2.77743e+07	1.17394e+07	3.68593e+07	1.32545e+08	2.01493e+07	1.95341e+07	1.05752e+08	1.86842e+07	1.28707e+07	1.32512e+07	3.50009e+07	3.66723e+07	5.0422e+07	4.83375e+06	4.35053e+07	2.50864e+07	1.99591e+07	1.08864e+07	4.57135e+07	1.17512e+08	6.2242e+06	4.32848e+07	742.541	742.54	742.54
0	PE(18:1p/18:1)-H	PE(36:2p)-H	PE	(18:1p/18:1)	(18:1p)	(18:1)			726.544	C41 H77 O7 N1 P1	2.10267e+08	1.15776e+08	2.71198e+07	9.19941e+07	2.99207e+07	8.92728e+07	9.95619e+07	2.5646e+07	3.89751e+07	8.39941e+07	4.47546e+07	9.47348e+07	2.19019e+08	2.24751e+08	9.75576e+07	4.44726e+07	1.19077e+08	5.662e+08	5.88749e+07	5.65685e+07	4.02728e+08	6.98764e+07	4.29245e+07	5.33783e+07	1.53952e+08	1.84724e+08	1.83699e+08	2.04302e+07	1.45803e+08	9.50237e+07	5.91271e+07	3.53621e+07	1.62807e+08	4.83394e+08	1.51395e+07	1.41666e+08	726.546	726.546	726.546
0	PE(18:1p/18:1)+H	PE(36:2p)+H	PE	(18:1p/18:1)	(18:1p)	(18:1)			728.559	C41 H79 O7 N1 P1	2.75841e+08	1.37813e+08	3.49859e+07	1.10922e+08	3.71785e+07	1.12685e+08	1.26798e+08	2.98499e+07	4.63092e+07	1.04329e+08	5.53913e+07	1.18634e+08	2.81559e+08	3.05966e+08	1.22625e+08	5.65874e+07	1.57239e+08	9.40457e+08	7.33891e+07	7.37545e+07	5.95429e+08	8.82976e+07	5.27049e+07	6.70865e+07	1.74822e+08	2.26767e+08	2.48716e+08	2.41025e+07	1.79283e+08	1.1051e+08	7.40406e+07	4.13158e+07	2.04153e+08	8.22884e+08	1.72404e+07	1.74383e+08	728.559	728.558	728.559
0	PE(18:1/18:2)+H	PE(36:3)+H	PE	(18:1/18:2)	(18:1)	(18:2)			742.538	C41 H77 O8 N1 P1	5.28133e+06	2.88216e+06	672253	2.73451e+06	801372	2.47373e+06	3.86965e+06	935331	991831	4.64429e+06	1.48271e+06	3.14903e+06	4.22635e+06	6.23824e+06	3.20778e+06	798297	3.4434e+06	1.86642e+07	1.09375e+06	1.92796e+06	1.55984e+07	1.52478e+06	995103	1.16993e+06	2.71835e+06	3.12832e+06	4.3161e+06	453861	4.47841e+06	2.59466e+06	1.35334e+06	872927	2.90073e+06	1.1318e+07	188792	3.70484e+06	742.539	742.538	742.538
0	PE(18:1/18:2)-H	PE(36:3)-H	PE	(18:1/18:2)	(18:1)	(18:2)			740.524	C41 H75 O8 N1 P1	3.69897e+06	1.75607e+06	435940	2.35817e+06	385751	1.43894e+06	2.99644e+06	498614	1.12558e+06	3.18017e+06	1.50822e+06	2.80034e+06	3.97348e+06	3.80985e+06	1.97789e+06	669395	1.99237e+06	9.61467e+06	1.24748e+06	867290	8.78343e+06	830581	776827	975980	1.50839e+06	1.64875e+06	3.26112e+06	157846	3.41299e+06	1.54713e+06	808213	523679	2.44354e+06	6.66263e+06	270540	1.62533e+06	740.524	740.524	740.524
1	PE(16:0p/20:3)-H	PE(36:3p)-H	PE	(16:0p/20:3)	(16:0p)	(20:3)			724.529	C41 H75 O7 N1 P1	9.83092e+06	3.52656e+06	1.11353e+06	3.62004e+06	7735.39	3.88076e+06	4.27904e+06	239408	104707	2.93971e+06	164965	2.67806e+06	4.07076e+06	3.55222e+06	1.79817e+06	5554.97	5.04288e+06	256575	2.35351e+06	1.21526e+06	8.56985e+06	1.19812e+06	14860.6	1.09396e+06	2.55957e+06	3.41147e+06	3.53192e+06	216531	3.33233e+06	3.06363e+06	1.98429e+06	3285.84	5.41477e+06	1.89473e+07	406209	4.11802e+06	724.529	724.529	724.529
1	PE(16:0p/20:3)+H	PE(36:3p)+H	PE	(16:0p/20:3)	(16:0p)	(20:3)			726.543	C41 H77 O7 N1 P1	1.37935e+07	5.89603e+06	1.9916e+06	7.41707e+06	1.16285e+06	4.65255e+06	1.50881e+07	2.38726e+06	3.14847e+06	9.17149e+06	4.37854e+06	5.94643e+06	1.66853e+07	1.55017e+07	7.18166e+06	1.96593e+06	8.13383e+06	4.44891e+07	5.25002e+06	4.54436e+06	1.52823e+07	2.96268e+06	2.27976e+06	2.66142e+06	7.44547e+06	9.37133e+06	1.17512e+07	548698	1.10936e+07	5.36225e+06	4.44128e+06	1.98389e+06	9.60154e+06	1.57949e+07	791675	8.80782e+06	726.543	726.543	726.543
0	PE(16:0/20:4)-H	PE(36:4)-H	PE	(16:0/20:4)	(16:0)	(20:4)			738.508	C41 H73 O8 N1 P1	2.61447e+07	1.48612e+07	6.04182e+06	1.92353e+07	3.97008e+06	1.21847e+07	2.32824e+07	4.9876e+06	1.17004e+07	1.89992e+07	8.67551e+06	1.30805e+07	3.20212e+07	2.56055e+07	1.66644e+07	5.64566e+06	2.00741e+07	8.30038e+07	1.15065e+07	1.1599e+07	6.33887e+07	6.07437e+06	6.94964e+06	6.82291e+06	1.64053e+07	1.70722e+07	2.78921e+07	2.03148e+06	2.60225e+07	1.27215e+07	1.11868e+07	5.50087e+06	2.29587e+07	5.71962e+07	4.20147e+06	2.27714e+07	738.509	738.509	738.51
0	PE(16:0/20:4)+H	PE(36:4)+H	PE	(16:0/20:4)	(16:0)	(20:4)			740.522	C41 H75 O8 N1 P1	6.03307e+07	4.21965e+07	3.89763e+06	4.99982e+07	2.45943e+06	2.95713e+07	6.3031e+07	1.3023e+07	2.59071e+07	5.39543e+07	1.72961e+07	2.53677e+07	8.22403e+07	6.97677e+07	3.16545e+07	1.17375e+07	4.50019e+07	2.02744e+08	2.71334e+07	1.92373e+06	1.62341e+08	115819	8.05005e+06	7.46083e+06	689991	1.28723e+06	6.7878e+07	121482	4.75143e+07	3.86216e+07	1.21732e+07	1.05388e+07	5.26321e+07	1.42559e+08	1.76536e+06	3.14097e+07	740.522	740.522	740.522
0	PE(36:4)+H	PE(36:4)+H	PE	(36:4)	(36:4)				740.522	C41 H75 O8 N1 P1	4.48533e+06	3.24799e+06	640007	2.67577e+06	1.30385e+06	2.48796e+06	3.47266e+06	1.10481e+06	2.74381e+06	4.27727e+06	1.49315e+06	2.68913e+06	5.05449e+06	4.77555e+06	2.73774e+06	2.03436e+06	3.81193e+06	6.18473e+06	3.21089e+06	2.14489e+06	6.72952e+06	1.43878e+06	1.5887e+06	1.49435e+06	3.9599e+06	4.56581e+06	4.7066e+06	545736	3.67366e+06	2.93856e+06	2.23795e+06	1.11581e+06	4.39486e+06	6.61984e+06	593270	5.15793e+06	740.52	740.52	740.522
0	PE(36:4)-H	PE(36:4)-H	PE	(36:4)	(36:4)				738.508	C41 H73 O8 N1 P1	0	51728.1	0	0	0	0	0	0	0	0	0	0	57909.7	0	174753	0	0	906932	0	0	119627	0	0	0	0	0	281694	0	155214	196290	0	0	148253	356342	0	96100		738.508
0	PE(16:0e/20:4)-H	PE(36:4e)-H	PE	(16:0e/20:4)	(16:0e)	(20:4)			724.529	C41 H75 O7 N1 P1	9.05748e+06	4.63407e+06	1.53614e+06	4.42425e+06	796990	3.76065e+06	6.23096e+06	1.57497e+06	2.16363e+06	4.86677e+06	2.63969e+06	4.40166e+06	8.83039e+06	7.86331e+06	4.7677e+06	1.56753e+06	6.37662e+06	2.5153e+07	3.59759e+06	3.65005e+06	1.81161e+07	1.98746e+06	2.86865e+06	1.57619e+06	5.7534e+06	5.32153e+06	8.40578e+06	218169	6.98503e+06	4.09585e+06	3.02189e+06	1.54267e+06	6.97097e+06	2.02689e+07	290673	6.07274e+06	724.53	724.529	724.53
0	PE(16:0p/20:4)-H	PE(36:4p)-H	PE	(16:0p/20:4)	(16:0p)	(20:4)			722.513	C41 H73 O7 N1 P1	4.07194e+07	2.01545e+07	1.01168e+07	3.09788e+07	5.94108e+06	1.81985e+07	5.03551e+07	9.50334e+06	2.16382e+07	3.48804e+07	1.57437e+07	2.68771e+07	6.75151e+07	4.70906e+07	3.77431e+07	9.63773e+06	4.96221e+07	1.58968e+08	2.91131e+07	2.07201e+07	1.40321e+08	8.17553e+06	1.48246e+07	1.19527e+07	2.75345e+07	2.37371e+07	4.84661e+07	2.98102e+06	3.64845e+07	1.94443e+07	1.77397e+07	9.47892e+06	3.88642e+07	8.77987e+07	5.84038e+06	3.33486e+07	722.514	722.514	722.514
0	PE(16:0p/20:4)+H	PE(36:4p)+H	PE	(16:0p/20:4)	(16:0p)	(20:4)			724.528	C41 H75 O7 N1 P1	5.17429e+07	2.43583e+07	1.43926e+07	4.46649e+07	7.43952e+06	2.39441e+07	7.52217e+07	1.21681e+07	2.86386e+07	5.03126e+07	2.02752e+07	4.14591e+07	9.48608e+07	6.82881e+07	4.8767e+07	1.2492e+07	6.37708e+07	2.97689e+08	3.70455e+07	3.03091e+07	2.54063e+08	1.15685e+07	1.95142e+07	1.62761e+07	3.71456e+07	3.3573e+07	6.73291e+07	3.66546e+06	5.66083e+07	2.58357e+07	2.39608e+07	1.31303e+07	5.47706e+07	1.50167e+08	7.73722e+06	4.35828e+07	724.528	724.527	724.529
0	PE(36:4p)+H	PE(36:4p)+H	PE	(36:4p)	(36:4p)				724.528	C41 H75 O7 N1 P1	9.12409e+06	8.95092e+06	1.86582e+06	5.47409e+06	2.54794e+06	6.48003e+06	5.45152e+06	1.83491e+06	3.32821e+06	6.62425e+06	2.52552e+06	5.83848e+06	1.05145e+07	1.09451e+07	5.18354e+06	3.07975e+06	6.52804e+06	1.82209e+07	3.68595e+06	3.43122e+06	1.72934e+07	4.09941e+06	2.70166e+06	3.80363e+06	8.60654e+06	1.06495e+07	9.15425e+06	1.52649e+06	8.19301e+06	6.37484e+06	4.25015e+06	844849	9.41351e+06	1.82818e+07	862902	9.18943e+06	724.528	724.528	724.528
0	PE(16:1/20:4)-H	PE(36:5)-H	PE	(16:1/20:4)	(16:1)	(20:4)			736.492	C41 H71 O8 N1 P1	454784	99470.9	0	111056	0	0	260340	0	0	7345.25	0	179165	344889	342541	307303	0	92733.5	1.39706e+06	0	0	1.01223e+06	0	0	0	127896	0	411910	0	103714	0	85829.6	0	178000	1.14814e+06	0	79578.7	736.492	736.492
0	PE(16:1/20:4)+H	PE(36:5)+H	PE	(16:1/20:4)	(16:1)	(20:4)			738.507	C41 H73 O8 N1 P1	484053	429312	81894.8	357235	0	7611.73	365666	3860.01	131602	601101	1465.11	187471	505735	1127.56	132063	28919	370813	2.44095e+06	185445	67797.4	1.14986e+06	24077.9	0	3721.99	288506	269425	1797	535.956	2308.06	982.924	127486	0	497215	1.24891e+06	1095.39	88039.3	738.507	738.507	738.507
0	PE(16:0p/20:5)-H	PE(36:5p)-H	PE	(16:0p/20:5)	(16:0p)	(20:5)			720.497	C41 H71 O7 N1 P1	0	0	0	53942.9	0	0	167544	0	0	0	84601.6	105045	296247	0	0	0	0	1.56745e+06	0	0	309638	0	0	67616.2	0	0	0	0	0	0	0	0	0	133186	0	0
0	PE(18:0p/19:1)-H	PE(37:1p)-H	PE	(18:0p/19:1)	(18:0p)	(19:1)			742.576	C42 H81 O7 N1 P1	2.05202e+06	1.38277e+06	94591.5	582863	2496.68	230442	303571	103674	266722	881972	0	246996	1.46085e+06	1.59263e+06	676889	680.619	198328	4.4539e+06	0	258755	3.05091e+06	66824.8	142064	113474	1.61066e+06	1.65051e+06	2.54275e+06	0	654877	2989.74	325067	1766.41	885039	4.76823e+06	0	1.07279e+06	742.577	742.576	742.576
0	PE(18:0p/19:1)+H	PE(37:1p)+H	PE	(18:0p/19:1)	(18:0p)	(19:1)			744.59	C42 H83 O7 N1 P1	2.28731e+06	489799	0	596230	158146	1.26438e+06	756374	133311	379516	338869	143016	1.17775e+06	2.99967e+06	1.24021e+06	246882	94210.9	457111	9.86807e+06	347844	0	6.7078e+06	399448	0	1.08884e+06	1.88975e+06	2.05268e+06	2.03897e+06	0	1.50797e+06	1.07084e+06	334359	0	1.83341e+06	8.42129e+06	1896.22	1.8802e+06	744.59	744.59
0	PE(18:1p/19:1)-H	PE(37:2p)-H	PE	(18:1p/19:1)	(18:1p)	(19:1)			740.56	C42 H79 O7 N1 P1	2.10413e+06	919836	0	355092	0	650164	1510.95	2522.35	119026	317911	0	424625	1.59142e+06	1.6273e+06	384955	283851	685725	5.38126e+06	121754	2355.74	2.59863e+06	113292	84033.7	0	519569	1.01839e+06	984894	0	721070	385581	456975	109870	982308	4.061e+06	0	936248	740.56	740.56
0	PE(17:0/20:4)-H	PE(37:4)-H	PE	(17:0/20:4)	(17:0)	(20:4)			752.524	C42 H75 O8 N1 P1	1.87761e+06	830961	91669.5	954356	0	392954	1.10014e+06	83326.9	586257	806767	191266	622265	1.71261e+06	1.29658e+06	778189	927.548	980286	4.38597e+06	557890	352183	3.08935e+06	5027.03	0	3263.07	719650	620706	1.52261e+06	0	1.28203e+06	330007	677008	85051.7	1.42301e+06	3.02278e+06	93735.5	1.07696e+06	752.524	752.524	752.524
0	PE(17:0/20:4)+H	PE(37:4)+H	PE	(17:0/20:4)	(17:0)	(20:4)			754.538	C42 H77 O8 N1 P1	2.64837e+06	1.02618e+06	0	630162	0	833211	1.36976e+06	0	822779	1.68401e+06	349326	291795	1.83689e+06	1.33025e+06	1.01509e+06	1859.36	912494	7.26269e+06	720836	10582.4	4.43566e+06	1741.86	501139	323318	1.13061e+06	1.07716e+06	2.40979e+06	1436.23	1.62469e+06	380447	691520	105998	1.71674e+06	4.73695e+06	0	1.63805e+06	754.539	754.538
0	PE(38:0)+H	PE(38:0)+H	PE	(38:0)	(38:0)				776.616	C43 H87 O8 N1 P1	2.60183e+06	2.61943e+06	0	1841.38	0	1.21383e+06	872448	0	204628	8486.88	434.04	2.01002e+06	8.54645e+06	2893.3	1.46786e+06	2696.26	3.31718e+06	15079.9	682140	3379.97	1.75187e+07	1519.89	3828.02	3562.2	2.37532e+06	4.38718e+06	5.22427e+06	0	2.74418e+06	2.23254e+06	5251.35	252740	4.46557e+06	1.65444e+07	1842.74	10310.3	776.616	776.616
0	PE(18:0p/20:0)-H	PE(38:0p)-H	PE	(18:0p/20:0)	(18:0p)	(20:0)			758.607	C43 H85 O7 N1 P1	758385	452475	0	96498.4	810.656	135305	128530	72100.4	73509.8	84015.7	90029.4	138493	530645	567471	6310.19	75955.6	3562.38	1.85757e+06	2611.32	0	1.45791e+06	140011	0	139956	289970	399297	808733	0	295777	3047.78	83022.9	0	542072	2.48978e+06	0	650978	758.607	758.607
0	PE(18:0p/20:0)+H	PE(38:0p)+H	PE	(18:0p/20:0)	(18:0p)	(20:0)			760.621	C43 H87 O7 N1 P1	1.26499e+06	147741	0	0	2307.7	475596	0	0	0	0	0	0	421077	315321	116493	0	107784	2.0608e+06	0	0	826369	126222	0	0	237128	145865	229719	0	155513	0	0	0	190247	2.65512e+06	0	819596	760.621	760.621
0	PE(18:0/20:1)+H	PE(38:1)+H	PE	(18:0/20:1)	(18:0)	(20:1)			774.601	C43 H85 O8 N1 P1	1.04401e+07	6.47754e+06	1.16658e+06	3.54387e+06	1.78684e+06	4.32866e+06	4.18281e+06	1.45481e+06	2.03069e+06	4.26338e+06	1.96316e+06	5.235e+06	1.22512e+07	1.13165e+07	4.49051e+06	1.54741e+06	6.18396e+06	4.68295e+07	2.67904e+06	2.29507e+06	2.95281e+07	3.17562e+06	2.44066e+06	3.012e+06	8.20034e+06	8.26426e+06	1.05532e+07	592307	7.68572e+06	4.11758e+06	2.43326e+06	1.71864e+06	7.30842e+06	3.92301e+07	3096.42	7.91225e+06	774.601	774.601	774.6
0	PE(18:0/20:1)-H	PE(38:1)-H	PE	(18:0/20:1)	(18:0)	(20:1)			772.586	C43 H83 O8 N1 P1	7.52412e+06	4.85536e+06	451113	2.56331e+06	1.24214e+06	2.87711e+06	3.70619e+06	1.07415e+06	1.30035e+06	4.00882e+06	1.46079e+06	3.52856e+06	7.52608e+06	6.93883e+06	3.2135e+06	2.12503e+06	4.32618e+06	1.80741e+07	1.71761e+06	2.30402e+06	1.48516e+07	2.36284e+06	1.62822e+06	2.18332e+06	5.76254e+06	5.78278e+06	6.85e+06	625740	5.12248e+06	2.59999e+06	1.94081e+06	1.40301e+06	5.87548e+06	1.75767e+07	454876	4.86232e+06	772.587	772.588	772.586
0	PE(18:0e/20:1)-H	PE(38:1e)-H	PE	(18:0e/20:1)	(18:0e)	(20:1)			758.607	C43 H85 O7 N1 P1	4.8483e+06	585432	0	148463	1525.04	585060	790022	76428.6	1369.21	310221	727.051	855455	1.11962e+06	2.29117e+06	295327	345560	650199	5.79989e+06	350914	326265	4.34067e+06	356974	242590	503593	1.13641e+06	1.67774e+06	2.07559e+06	64463.7	1.12443e+06	721700	445179	3312.1	1.02999e+06	4.93427e+06	4973.63	1.32531e+06	758.607	758.607
0	PE(18:0p/20:1)-H	PE(38:1p)-H	PE	(18:0p/20:1)	(18:0p)	(20:1)			756.591	C43 H83 O7 N1 P1	5.6702e+07	2.92654e+07	5.84771e+06	2.24322e+07	9.02767e+06	2.73803e+07	2.17528e+07	6.60469e+06	7.73141e+06	1.77392e+07	1.09353e+07	2.3494e+07	5.33392e+07	5.16738e+07	2.43599e+07	1.20782e+07	2.8573e+07	1.44479e+08	1.39254e+07	1.24168e+07	1.07183e+08	1.72499e+07	9.58923e+06	1.6249e+07	4.01526e+07	5.02472e+07	5.59415e+07	5.68994e+06	3.64649e+07	2.32201e+07	1.69678e+07	8.63907e+06	4.23745e+07	1.48621e+08	4.87854e+06	3.6974e+07	756.592	756.593	756.592
0	PE(18:0p/20:1)+H	PE(38:1p)+H	PE	(18:0p/20:1)	(18:0p)	(20:1)			758.606	C43 H85 O7 N1 P1	6.5859e+07	3.08633e+07	7.32814e+06	2.4147e+07	1.1175e+07	3.08402e+07	2.45203e+07	6.57037e+06	8.74002e+06	2.14714e+07	1.19085e+07	2.63586e+07	6.20088e+07	6.81972e+07	2.67289e+07	1.54203e+07	3.0701e+07	2.46381e+08	1.40596e+07	1.48401e+07	1.49266e+08	1.84713e+07	1.129e+07	1.82352e+07	4.5586e+07	5.53905e+07	6.39915e+07	5.71787e+06	4.43106e+07	2.55881e+07	1.95841e+07	1.06175e+07	4.97627e+07	2.35248e+08	4.56925e+06	4.50144e+07	758.606	758.606	758.606
0	PE(20:1/18:1)+H	PE(38:2)+H	PE	(20:1/18:1)	(20:1)	(18:1)			772.585	C43 H83 O8 N1 P1	1.16605e+07	5.52211e+06	613059	4.68896e+06	440748	4.41141e+06	8.18488e+06	1.17362e+06	2.0134e+06	5.34619e+06	1.88342e+06	5.94391e+06	1.20913e+07	1.39924e+07	7.33774e+06	3.31128e+06	7.12822e+06	4.09082e+07	2.23745e+06	2.80098e+06	2.24011e+07	4.84587e+06	2.05766e+06	3.47775e+06	7.09256e+06	7.89757e+06	1.00445e+07	615066	7.67699e+06	4.53059e+06	3.25558e+06	1.14658e+06	8.51868e+06	2.81141e+07	114179	8.04411e+06	772.584	772.583	772.585
0	PE(20:1/18:1)-H	PE(38:2)-H	PE	(20:1/18:1)	(20:1)	(18:1)			770.571	C43 H81 O8 N1 P1	8.71062e+06	4.4034e+06	770863	2.82159e+06	1.10963e+06	3.1939e+06	4.31907e+06	1.15701e+06	2.18487e+06	4.47981e+06	1.71322e+06	4.53154e+06	8.65584e+06	9.76553e+06	4.97785e+06	2.3094e+06	4.94747e+06	2.38281e+07	3.35513e+06	2.57091e+06	1.54457e+07	3.49756e+06	2.56085e+06	2.31099e+06	5.15618e+06	6.58696e+06	7.33779e+06	511095	6.27372e+06	3.00574e+06	2.08899e+06	782002	6.23146e+06	1.75761e+07	147094	5.44623e+06	770.571	770.571	770.571
0	PE(18:1p/20:1)-H	PE(38:2p)-H	PE	(18:1p/20:1)	(18:1p)	(20:1)			754.576	C43 H81 O7 N1 P1	9.56161e+07	4.89368e+07	1.16486e+07	3.89407e+07	1.39059e+07	3.90278e+07	4.13543e+07	1.18491e+07	1.58453e+07	3.41845e+07	1.90925e+07	4.3758e+07	9.11836e+07	1.06006e+08	4.24877e+07	2.22303e+07	6.04096e+07	2.54314e+08	2.26365e+07	2.31786e+07	1.80476e+08	3.47193e+07	1.69332e+07	2.54654e+07	6.62541e+07	8.42489e+07	8.51644e+07	9.43733e+06	6.24417e+07	3.75316e+07	2.62395e+07	1.27633e+07	7.65142e+07	2.17629e+08	6.12446e+06	6.78651e+07	754.577	754.577	754.577
0	PE(18:1p/20:1)+H	PE(38:2p)+H	PE	(18:1p/20:1)	(18:1p)	(20:1)			756.59	C43 H83 O7 N1 P1	1.31413e+08	6.03887e+07	1.29792e+07	4.73109e+07	1.4049e+07	4.66096e+07	5.14122e+07	1.44782e+07	1.67574e+07	4.69554e+07	2.20409e+07	5.69705e+07	1.26594e+08	1.37344e+08	5.42867e+07	2.7158e+07	7.66771e+07	4.19132e+08	2.76975e+07	2.92058e+07	2.71665e+08	4.15106e+07	2.06838e+07	2.99959e+07	8.64133e+07	1.131e+08	1.06701e+08	1.06006e+07	7.29722e+07	5.18479e+07	3.08629e+07	1.5006e+07	9.26993e+07	3.73866e+08	5.89828e+06	8.21858e+07	756.59	756.59	756.59
0	PE(18:0/20:3)-H	PE(38:3)-H	PE	(18:0/20:3)	(18:0)	(20:3)			768.555	C43 H79 O8 N1 P1	7.80605e+06	3.53064e+06	1.93381e+06	6.0324e+06	1.00365e+06	4.16311e+06	8.03769e+06	1.8098e+06	3.10996e+06	5.74728e+06	2.46601e+06	5.25171e+06	2.90556e+06	8.67866e+06	4.82402e+06	2.22114e+06	6.86549e+06	2.63144e+07	4.98262e+06	3.46326e+06	2.41217e+07	2.35422e+06	2.41408e+06	1.82052e+06	6.57546e+06	5.47804e+06	1.16558e+07	444775	1.02191e+07	5.08118e+06	4.31199e+06	2.36895e+06	8.47229e+06	6.04222e+06	1.90648e+06	8.64061e+06	768.556	768.556	768.555
0	PE(18:0/20:3)+H	PE(38:3)+H	PE	(18:0/20:3)	(18:0)	(20:3)			770.569	C43 H81 O8 N1 P1	1.22069e+07	5.47061e+06	2.73056e+06	7.7634e+06	2.08219e+06	5.91216e+06	1.19336e+07	2.21441e+06	4.27511e+06	9.0362e+06	4.06253e+06	6.93722e+06	1.63875e+07	1.34115e+07	8.78482e+06	3.32103e+06	8.90838e+06	1.02644e+07	5.41847e+06	5.90249e+06	9.25465e+06	2.5155e+06	3.15133e+06	2.91683e+06	9.19693e+06	8.54657e+06	1.68356e+07	1.11274e+06	1.35182e+07	6.1121e+06	5.84898e+06	4.24449e+06	1.20884e+07	1.0241e+07	2.22191e+06	1.39168e+07	770.569	770.57	770.569
0	PE(18:0p/20:3)-H	PE(38:3p)-H	PE	(18:0p/20:3)	(18:0p)	(20:3)			752.56	C43 H79 O7 N1 P1	6.74803e+06	3.69011e+06	1.03786e+06	3.94274e+06	519818	3.95313e+06	3.90651e+06	701011	1.2214e+06	2.75139e+06	1.55359e+06	3.39201e+06	3119.48	6.59631e+06	4.50329e+06	1.24749e+06	4.63272e+06	6.09306e+06	2.63448e+06	2.23968e+06	80384.1	2.0317e+06	1.80162e+06	2.33183e+06	6.60383e+06	6.51773e+06	6.68739e+06	568375	7.25044e+06	3.95576e+06	3.03602e+06	1.48884e+06	6.13851e+06	6.1087e+06	589801	6.05447e+06	752.561	752.561	752.561
0	PE(18:0p/20:3)+H	PE(38:3p)+H	PE	(18:0p/20:3)	(18:0p)	(20:3)			754.575	C43 H81 O7 N1 P1	8.92759e+06	4.43127e+06	2.22804e+06	6.23771e+06	1.45377e+06	5.48076e+06	6.51499e+06	1.36384e+06	1.10385e+06	3.45869e+06	1.96496e+06	4.18696e+06	1.1508e+07	9.89757e+06	5.91424e+06	3534.88	5.47537e+06	7.37607e+06	3.37263e+06	2.5892e+06	2.56331e+07	2.46297e+06	1.68066e+06	19659	462440	9.94495e+06	1.06876e+07	475213	8.24211e+06	4.95875e+06	3.54791e+06	2.58298e+06	9.94492e+06	3.69363e+07	714887	8.84012e+06	754.574	754.574	754.575
0	PE(18:0/20:4)-H	PE(38:4)-H	PE	(18:0/20:4)	(18:0)	(20:4)			766.539	C43 H77 O8 N1 P1	2.63541e+08	1.34636e+08	7.82119e+07	2.01877e+08	4.93772e+07	1.30736e+08	2.52669e+08	5.24655e+07	1.10181e+08	1.9737e+08	8.77366e+07	1.45121e+08	3.13843e+08	2.51284e+08	1.79569e+08	6.03286e+07	2.14863e+08	7.16474e+08	1.3413e+08	1.15466e+08	6.2689e+08	5.43168e+07	7.36474e+07	6.75218e+07	1.89472e+08	1.63794e+08	3.27109e+08	2.71027e+07	2.80022e+08	1.37168e+08	1.17364e+08	7.29929e+07	2.55611e+08	6.05893e+08	4.89616e+07	2.65565e+08	766.54	766.54	766.54
0	PE(18:0/20:4)+H	PE(38:4)+H	PE	(18:0/20:4)	(18:0)	(20:4)			768.554	C43 H79 O8 N1 P1	4.15125e+08	1.90594e+08	9.65459e+07	2.72539e+08	6.01199e+07	1.56057e+08	3.74541e+08	6.31107e+07	1.44367e+08	2.77642e+08	1.11185e+08	2.07492e+08	4.96646e+08	3.84337e+08	2.5809e+08	7.94021e+07	2.96326e+08	1.55624e+09	1.7985e+08	1.60948e+08	1.23908e+09	6.66837e+07	9.08364e+07	8.71869e+07	2.74756e+08	2.28169e+08	5.5249e+08	3.24248e+07	4.21133e+08	1.85163e+08	1.63999e+08	9.16056e+07	4.00522e+08	1.13949e+09	6.19363e+07	4.04958e+08	768.554	768.553	768.554
0	PE(38:4)+H	PE(38:4)+H	PE	(38:4)	(38:4)				768.554	C43 H79 O8 N1 P1	1.23121e+07	6.23771e+06	3.01322e+06	7.19347e+06	2.51743e+06	6.26798e+06	8.81455e+06	2.47842e+06	4.45725e+06	7.19239e+06	4.82645e+06	7.58256e+06	1.2519e+07	1.45051e+07	8.18626e+06	3.68027e+06	9.44684e+06	2.67645e+07	6.17427e+06	5.25823e+06	1.79385e+07	5.01727e+06	3.67006e+06	5.9333e+06	8.39491e+06	8.78929e+06	1.19534e+07	1.45674e+06	9.38875e+06	7.06449e+06	5.11579e+06	3.78506e+06	1.01684e+07	2.2902e+07	2.26596e+06	1.02251e+07	768.554	768.554	768.554
0	PE(16:0e/22:4)-H	PE(38:4e)-H	PE	(16:0e/22:4)	(16:0e)	(22:4)			752.56	C43 H79 O7 N1 P1	8.03126e+06	3.37174e+06	1.71989e+06	5.62422e+06	781082	3.30156e+06	8.12759e+06	1.3768e+06	1.83918e+06	3.98353e+06	1.73523e+06	3.97883e+06	6.87323e+06	6.26867e+06	4.48405e+06	975969	4.61447e+06	2.06088e+07	3.42429e+06	3.0229e+06	1.77974e+07	1.03579e+06	1.45715e+06	1.48153e+06	4.84082e+06	5.83729e+06	8.80287e+06	522483	8.04243e+06	4.23312e+06	3.14672e+06	1.6398e+06	7.39159e+06	1.81794e+07	870325	6.3194e+06	752.56	752.56	752.561
0	PE(38:4e)+H	PE(38:4e)+H	PE	(16:0e/22:4)	(16:0e)	(22:4)			754.575	C43 H81 O7 N1 P1	9.46813e+06	4.49757e+06	2.40362e+06	7.52817e+06	2.0855e+06	4.53554e+06	7.3657e+06	1.78892e+06	3.30795e+06	4.54109e+06	2.85934e+06	4.36298e+06	8.72027e+06	6.69684e+06	5.7082e+06	1.44004e+06	7.11064e+06	2.83046e+07	4.45041e+06	4.3237e+06	2.15715e+07	1.53426e+06	2.10199e+06	2.39155e+06	7.0674e+06	5.36271e+06	1.14032e+07	969974	8.23921e+06	4.49773e+06	5.53328e+06	2.77583e+06	7.80653e+06	2.3921e+07	1.59988e+06	9.37371e+06	754.575	754.575	754.575
0	PE(18:0p/20:4)-H	PE(38:4p)-H	PE	(18:0p/20:4)	(18:0p)	(20:4)			750.544	C43 H77 O7 N1 P1	1.28034e+08	6.35022e+07	2.8576e+07	8.88905e+07	2.02838e+07	5.386e+07	1.0151e+08	1.82197e+07	4.16684e+07	7.42451e+07	3.16093e+07	6.02484e+07	1.37297e+08	1.0661e+08	7.58467e+07	2.23598e+07	8.40957e+07	3.24378e+08	5.17289e+07	4.19909e+07	2.64644e+08	2.17556e+07	2.99718e+07	2.52401e+07	9.36819e+07	8.36899e+07	1.40999e+08	1.00608e+07	1.1381e+08	5.95804e+07	5.10751e+07	2.83775e+07	1.16954e+08	2.73757e+08	1.73889e+07	1.04448e+08	750.545	750.545	750.545
0	PE(18:0p/20:4)+H	PE(38:4p)+H	PE	(18:0p/20:4)	(18:0p)	(20:4)			752.559	C43 H79 O7 N1 P1	5.07226e+07	2.25048e+07	3.91479e+07	1.10523e+08	2.49257e+07	6.80899e+07	1.28418e+08	2.37331e+07	1.68156e+07	8.55225e+07	3.98107e+07	7.95316e+07	1.036e+07	1.27118e+07	9.70722e+07	1.04438e+07	1.12042e+08	5.78829e+08	6.82027e+07	5.89581e+07	4.34219e+08	2.97572e+07	3.86988e+07	3.51013e+07	1.11677e+08	1.0654e+08	1.84193e+08	1.30278e+07	1.44594e+08	7.12825e+07	6.29046e+07	3.5638e+07	1.50424e+08	5.06402e+08	2.22432e+07	1.34095e+08	752.56	752.559	752.559
0	PE(18:1/20:4)-H	PE(38:5)-H	PE	(18:1/20:4)	(18:1)	(20:4)			764.524	C43 H75 O8 N1 P1	2.89836e+07	2.00885e+07	6.0226e+06	2.17813e+07	4.56785e+06	1.414e+07	2.21376e+07	6.34842e+06	1.0842e+07	2.35028e+07	8.46696e+06	1.65756e+07	3.23922e+07	3.51136e+07	1.54523e+07	6.20744e+06	1.94481e+07	9.9909e+07	1.16931e+07	1.03833e+07	7.597e+07	8.94849e+06	6.08982e+06	7.2278e+06	1.68199e+07	1.90177e+07	2.79148e+07	2.39067e+06	2.62739e+07	1.4566e+07	1.10576e+07	5.93787e+06	2.50267e+07	8.02469e+07	3.55105e+06	2.28943e+07	764.524	764.524	764.525
0	PE(18:1/20:4)+H	PE(38:5)+H	PE	(18:1/20:4)	(18:1)	(20:4)			766.538	C43 H77 O8 N1 P1	1.36152e+08	7.57218e+07	1.36508e+07	7.03509e+07	8.754e+06	5.46853e+07	8.74053e+07	1.81183e+07	3.29913e+07	2.62294e+07	2.45943e+07	6.06408e+07	1.57423e+08	1.50507e+08	5.27525e+07	2.49236e+06	7.28415e+07	3.64538e+08	4.34923e+07	3.24129e+07	2.68188e+08	2.024e+07	1.83997e+07	2.03478e+07	6.78719e+07	8.64714e+07	1.04949e+08	3.87377e+06	9.82269e+07	5.88443e+07	2.57638e+07	1.66898e+07	9.42285e+07	2.97253e+08	3.50524e+06	8.42078e+07	766.538	766.538	766.538
0	PE(16:0/22:5)-H	PE(38:5)-H	PE	(16:0/22:5)	(16:0)	(22:5)			764.524	C43 H75 O8 N1 P1	1.3069e+06	681971	143623	1.04756e+06	170350	410321	1.59869e+06	110156	410940	949008	322434	644673	1.68033e+06	1.84949e+06	512877	902.078	1.21168e+06	1.0456e+06	331523	362426	2.89738e+06	0	444752	201752	673901	476381	1.58113e+06	0	1.16572e+06	784675	358285	217686	914245	3.05871e+06	0	1.66453e+06	764.524	764.524	764.524
0	PE(16:0e/22:5)-H	PE(38:5e)-H	PE	(16:0e/22:5)	(16:0e)	(22:5)			750.544	C43 H77 O7 N1 P1	2.44738e+06	1.11241e+06	128724	2.10529e+06	45609.2	1.31979e+06	1.93651e+06	122864	850712	1.2283e+06	254879	1.2261e+06	2.55434e+06	2.57823e+06	501246	274886	1.58309e+06	2.93568e+06	414914	568317	4.63102e+06	176067	152560	87224.9	1.18809e+06	2.70613e+06	2.03634e+06	371516	1.50055e+06	662210	568337	176937	2.23104e+06	2.86041e+06	253249	1.40206e+06	750.544	750.544	750.544
0	PE(18:1p/20:4)-H	PE(38:5p)-H	PE	(18:1p/20:4)	(18:1p)	(20:4)			748.529	C43 H75 O7 N1 P1	8.9848e+07	4.35443e+07	1.73788e+07	5.34755e+07	1.33028e+07	3.94078e+07	6.67635e+07	1.43482e+07	2.81301e+07	4.85159e+07	2.22188e+07	4.37634e+07	9.8435e+07	8.60653e+07	5.37523e+07	1.64046e+07	5.74425e+07	2.54112e+08	3.64517e+07	3.11275e+07	1.91668e+08	1.62642e+07	2.02303e+07	2.04469e+07	5.91963e+07	5.77423e+07	9.55968e+07	7.28379e+06	7.91543e+07	4.24103e+07	3.27596e+07	1.9587e+07	7.39826e+07	1.95613e+08	1.07899e+07	7.00938e+07	748.529	748.529	748.529
0	PE(18:1p/20:4)+H	PE(38:5p)+H	PE	(18:1p/20:4)	(18:1p)	(20:4)			750.543	C43 H77 O7 N1 P1	8.79596e+07	3.39518e+07	1.89844e+07	4.84444e+07	1.47059e+07	4.47544e+07	7.26887e+07	2.1261e+07	2.20736e+07	6.87577e+07	3.08985e+07	8.59053e+07	1.17372e+08	9.01715e+07	3.93335e+07	4.80478e+07	6.63434e+07	3.80237e+08	3.04748e+07	8.84345e+07	2.62919e+08	5.27783e+07	6.69367e+08	6.02953e+07	6.06286e+07	6.43362e+07	1.00559e+08	2.24197e+07	8.41e+07	3.40107e+07	3.00317e+07	2.37699e+07	8.93328e+07	2.84998e+08	2.92199e+07	6.25849e+07	750.541	750.541	750.543
0	PE(18:0p/20:5)-H	PE(38:5p)-H	PE	(18:0p/20:5)	(18:0p)	(20:5)			748.529	C43 H75 O7 N1 P1	304765	4419.7	242680	497969	116463	345014	558952	0	5760.79	1.02119e+06	124477	442159	1.48229e+06	12730.8	592844	2568.77	758452	2.87115e+06	359803	163041	4.8827e+06	67939.9	4660.22	0	493398	204784	744776	0	501055	781047	0	0	546766	2.33496e+06	0	808330	748.529	748.529	748.529
0	PE(18:2/20:4)-H	PE(38:6)-H	PE	(18:2/20:4)	(18:2)	(20:4)			762.508	C43 H73 O8 N1 P1	360833	135650	0	140522	0	251970	432514	0	77244.2	88888.4	0	160458	385485	357519	93967.4	0	136889	1.02417e+06	3296.32	0	818335	0	0	0	151341	73040.3	512817	0	197901	1890.05	0	943.257	303762	1.10351e+06	0	164688	762.508	762.508
0	PE(18:2/20:4)+H	PE(38:6)+H	PE	(18:2/20:4)	(18:2)	(20:4)			764.522	C43 H75 O8 N1 P1	683363	461927	0	683101	83000.1	177319	666417	94553.6	119706	417929	0	241850	1.34215e+06	545292	149454	0	371381	2.35803e+06	110767	119292	1.60099e+06	110123	3189.08	0	186511	217345	535643	0	417500	0	0	0	441698	1.67392e+06	0	287743	764.522	764.522
0	PE(16:0/22:6)-H	PE(38:6)-H	PE	(16:0/22:6)	(16:0)	(22:6)			762.508	C43 H73 O8 N1 P1	1.14238e+08	5.73152e+07	3.532e+07	9.51929e+07	2.03813e+07	5.43303e+07	1.15765e+08	2.39445e+07	5.82921e+07	1.00293e+08	3.96581e+07	6.53317e+07	1.64263e+08	1.18837e+08	7.72631e+07	2.24842e+07	8.77253e+07	3.19047e+08	6.02697e+07	4.81502e+07	905496	1.70122e+07	3.32976e+07	2.5956e+07	7.4676e+07	6.5593e+07	1.46391e+08	9.89198e+06	1.23906e+08	6.59183e+07	5.52363e+07	3.13287e+07	1.23054e+08	2.81698e+08	2.99088e+07	1.36969e+08	762.508	762.509	762.509
0	PE(16:0/22:6)+H	PE(38:6)+H	PE	(16:0/22:6)	(16:0)	(22:6)			764.522	C43 H75 O8 N1 P1	1.8818e+08	8.7989e+07	4.97934e+07	1.43994e+08	2.91753e+07	7.6914e+07	1.87264e+08	3.25937e+07	8.73555e+07	1.62389e+08	5.86429e+07	9.5492e+07	2.49037e+08	1.99173e+08	1.19265e+08	3.24129e+07	1.2767e+08	7.1832e+08	9.01208e+07	7.74234e+07	5.49128e+08	2.50196e+07	4.64173e+07	3.72859e+07	1.08438e+08	9.83006e+07	2.55605e+08	1.341e+07	2.11272e+08	9.93156e+07	7.41858e+07	4.56863e+07	1.80028e+08	5.69119e+08	4.24156e+07	2.0624e+08	764.522	764.522	764.523
1	PE(16:0e/22:6)-H	PE(38:6e)-H	PE	(16:0e/22:6)	(16:0e)	(22:6)			748.529	C43 H75 O7 N1 P1	8.67471e+07	4.31293e+07	1.71371e+07	4.96442e+07	1.33569e+07	3.83133e+07	6.71375e+07	1.43777e+07	2.80385e+07	4.87293e+07	2.21151e+07	4.34191e+07	1.00159e+08	8.63783e+07	5.29872e+07	1.63887e+07	5.97755e+07	2.54118e+08	3.56136e+07	3.11667e+07	1.81857e+08	1.93196e+07	2.03994e+07	2.04451e+07	5.95149e+07	5.72669e+07	3.2357e+07	7.30193e+06	7.95669e+07	4.3048e+07	3.2876e+07	1.97861e+07	7.4383e+07	2.01333e+08	1.05199e+07	7.26017e+07	748.529	748.529	748.53
1	PE(18:2p/20:4)-H	PE(38:6p)-H	PE	(18:2p/20:4)	(18:2p)	(20:4)			746.513	C43 H73 O7 N1 P1	862887	113838	0	239312	0	151285	308046	0	162085	534985	98800.8	1632.28	1.23349e+06	894598	323355	0	443486	1.81656e+06	285645	1240.59	1.76836e+06	0	0	69234.7	466532	133511	934580	0	638971	394366	156834	71071	381351	2.062e+06	92600.7	525567	746.513	746.513
1	PE(18:2p/20:4)+H	PE(38:6p)+H	PE	(18:2p/20:4)	(18:2p)	(20:4)			748.528	C43 H75 O7 N1 P1	923839	343910	125230	596425	447313	280366	9.92027e+06	809549	2.28533e+06	470467	2.39333e+06	300377	2453.96	1.94441e+06	1.13736e+06	179259	2.73007e+06	4.19349e+06	558705	2.96656e+07	2.72151e+06	84726	92640.2	1.97993e+06	616028	422925	851103	0	505857	325040	244972	170891	1.16653e+06	2.67619e+06	0	3.08341e+06	748.528	748.528
0	PE(16:0p/22:6)-H	PE(38:6p)-H	PE	(16:0p/22:6)	(16:0p)	(22:6)			746.513	C43 H73 O7 N1 P1	1.32775e+08	6.19433e+07	4.11898e+07	1.09207e+08	2.32182e+07	6.19056e+07	1.53756e+08	2.86276e+07	6.76566e+07	1.12804e+08	4.59014e+07	8.39987e+07	1.9611e+08	1.47914e+08	1.11406e+08	2.767e+07	1.19557e+08	4.06862e+08	7.76498e+07	6.13301e+07	3.77704e+08	2.06528e+07	4.17092e+07	3.27391e+07	9.35182e+07	8.03053e+07	1.68382e+08	9.35229e+06	1.48076e+08	6.88151e+07	6.42423e+07	3.87749e+07	1.48815e+08	3.11036e+08	2.82197e+07	1.41702e+08	746.514	746.514	746.514
0	PE(16:0p/22:6)+H	PE(38:6p)+H	PE	(16:0p/22:6)	(16:0p)	(22:6)			748.528	C43 H75 O7 N1 P1	1.93476e+08	9.06985e+07	5.30051e+07	1.61178e+08	3.03133e+07	8.12131e+07	2.32299e+08	3.83366e+07	8.84072e+07	1.60689e+08	6.58491e+07	1.16371e+08	3.13616e+08	2.0518e+08	1.54708e+08	3.77903e+07	1.75014e+08	8.55854e+08	9.96725e+07	9.11621e+07	6.95944e+08	3.04318e+07	5.9363e+07	4.54052e+07	1.32331e+08	1.05409e+08	2.42125e+08	1.27837e+07	2.24252e+08	9.71857e+07	9.01528e+07	4.76762e+07	2.25964e+08	6.27753e+08	3.64876e+07	2.14129e+08	748.528	748.528	748.528
0	PE(16:1/22:6)+H	PE(38:7)+H	PE	(16:1/22:6)	(16:1)	(22:6)			762.507	C43 H73 O8 N1 P1	978770	141067	0	586770	0	451587	342632	225681	0	369223	0	0	1.6607e+06	195406	728029	0	0	1.83788e+06	368306	0	4.74912e+06	0	0	0	333722	0	1.91529e+06	0	795284	0	0	0	942617	2.43632e+06	197993	446006	762.507	762.507
0	PE(16:1/22:6)-H	PE(38:7)-H	PE	(16:1/22:6)	(16:1)	(22:6)			760.492	C43 H71 O8 N1 P1	0	0	0	154843	0	0	43309.5	0	0	135442	0	0	225051	116141	0	0	0	862282	0	0	256313	0	0	0	0	0	94489.8	0	0	0	0	44391.5	0	246279	0	0
0	PE(38:7p)+H	PE(38:7p)+H	PE	(38:7p)	(38:7p)				746.512	C43 H73 O7 N1 P1	5.17301e+06	3.1614e+06	1.72339e+06	4.92281e+06	639712	2.26835e+06	7.24345e+06	1.83167e+06	3.71355e+06	6.6267e+06	2.70013e+06	5.2647e+06	9.3398e+06	6.20196e+06	5.54783e+06	1.9241e+06	7.33796e+06	1.44646e+07	3.97127e+06	3.32812e+06	1.62429e+07	974472	2.52889e+06	1.7195e+06	4.12971e+06	3.62465e+06	7.49379e+06	0	4.88861e+06	3.25152e+06	2.3591e+06	1.9291e+06	5.28073e+06	9.05776e+06	897516	5.24363e+06	746.51	746.512	746.509
0	PE(18:1p/21:0)-H	PE(39:1p)-H	PE	(18:1p/21:0)	(18:1p)	(21:0)			770.607	C44 H85 O7 N1 P1	894973	187225	0	0	0	131295	0	0	0	0	0	0	2099.06	373145	228127	0	1193.9	1.69608e+06	0	0	11860.1	0	0	0	0	217856	587395	0	636415	0	0	0	251143	1.83776e+06	0	542317	770.607	770.607
0	PE(18:1p/21:1)-H	PE(39:2p)-H	PE	(18:1p/21:1)	(18:1p)	(21:1)			768.591	C44 H83 O7 N1 P1	664372	332515	0	4597.35	0	370362	143270	0	76103.3	79955	0	185886	856248	250189	0	0	326686	2.16189e+06	0	0	1.11853e+06	0	0	0	476046	729838	294410	0	215714	92981.2	182350	0	529293	2.15425e+06	0	361296	768.591	768.591
0	PE(19:0/20:4)+H	PE(39:4)+H	PE	(19:0/20:4)	(19:0)	(20:4)			782.569	C44 H81 O8 N1 P1	337810	0	0	0	0	167987	23345.6	0	0	0	0	0	688252	302409	0	0	0	2.33516e+06	0	0	1.66085e+06	0	0	0	0	233914	247659	0	274254	0	0	0	258896	20180.6	0	0	782.569
0	PE(17:0/22:6)-H	PE(39:6)-H	PE	(17:0/22:6)	(17:0)	(22:6)			776.524	C44 H75 O8 N1 P1	3.54814e+06	1.27732e+06	1470.19	1.70749e+06	82480.4	1.16916e+06	1.8279e+06	0	1.01221e+06	2.37226e+06	545351	793178	3.09161e+06	1.71878e+06	2.11653e+06	240728	1.59702e+06	7.43546e+06	1.04023e+06	640401	4.2156e+06	137447	445284	496772	1.25172e+06	500621	2.5099e+06	0	2.84496e+06	1.09313e+06	616534	296662	1.90722e+06	4.49824e+06	150531	2.53149e+06	776.524	776.524	776.524
0	PE(17:0/22:6)+H	PE(39:6)+H	PE	(17:0/22:6)	(17:0)	(22:6)			778.538	C44 H77 O8 N1 P1	4.7715e+06	1.56706e+06	827183	2.65895e+06	423896	1.29172e+06	2.50204e+06	494551	2.20585e+06	4.19073e+06	831164	1.1948e+06	4.40127e+06	3.07472e+06	2.32014e+06	506327	2.53081e+06	1.19489e+07	1.53369e+06	947049	8.54453e+06	226314	421518	616170	1.97013e+06	1.71358e+06	3.93326e+06	0	3.9714e+06	1.6266e+06	1.14034e+06	828259	3.4431e+06	1.00098e+07	868587	3.30214e+06	778.538	778.538	778.538
0	PE(18:0/22:1)-H	PE(40:1)-H	PE	(18:0/22:1)	(18:0)	(22:1)			800.617	C45 H87 O8 N1 P1	0	0	0	61756.6	0	55110	124163	0	0	46994.1	33682.5	0	76879.8	235885	0	0	5344.28	942678	0	0	364192	0	0	60491.7	32466.5	93023.2	0	0	146422	0	0	0	170232	475897	0	0
0	PE(18:0p/22:1)-H	PE(40:1p)-H	PE	(18:0p/22:1)	(18:0p)	(22:1)			784.623	C45 H87 O7 N1 P1	4.37618e+06	2.18586e+06	4978.34	1.79294e+06	338682	1.60766e+06	1.46693e+06	574254	129117	1.18527e+06	435311	1.72484e+06	3.7932e+06	3.59381e+06	1.21256e+06	776853	1.68957e+06	1.09959e+07	649406	355084	7.80514e+06	1.22389e+06	148734	970356	2.72553e+06	3.35485e+06	3.7374e+06	329458	2.58018e+06	1.80177e+06	1.24236e+06	434890	3.03009e+06	1.21548e+07	69636	2.89256e+06	784.624	784.625	784.623
0	PE(18:0p/22:1)+H	PE(40:1p)+H	PE	(18:0p/22:1)	(18:0p)	(22:1)			786.637	C45 H89 O7 N1 P1	5.0475e+06	2.49447e+06	214113	1.4094e+06	668405	3.06989e+06	2.4715e+06	81202.9	562637	1.34312e+06	484891	1.50697e+06	4.66174e+06	4.88982e+06	1.30569e+06	696335	1.99982e+06	1.36408e+07	2688.38	652778	1.00598e+07	541510	736225	739760	3.75045e+06	3.82368e+06	4.3953e+06	114396	5.98439e+06	1.79527e+06	644672	325881	3.43576e+06	1.53133e+07	7047.28	3.79925e+06	786.638	786.635	786.637
0	PE(20:1/20:1)+H	PE(40:2)+H	PE	(20:1/20:1)	(20:1)	(20:1)			800.616	C45 H87 O8 N1 P1	520533	161587	0	5984.34	3328.02	0	0	0	0	556021	0	301438	1.10014e+06	2.55114e+06	165467	208224	362444	4.81834e+06	2759.84	1448.72	3.13598e+06	2455.34	0	176239	539953	445256	675562	0	595222	204739	2174.9	0	116987	3.06091e+06	0	133636	800.616	800.616
0	PE(20:1/20:1)-H	PE(40:2)-H	PE	(20:1/20:1)	(20:1)	(20:1)			798.602	C45 H85 O8 N1 P1	506358	562172	2840.23	133257	0	5418.26	181288	1741.17	0	170503	1482	343014	1.22624e+06	1.17278e+06	238495	0	369831	3.14123e+06	2466.86	2846.75	1.97895e+06	110892	68449.1	75863.6	751473	818898	436509	0	411269	422694	0	0	375064	2.45028e+06	0	199063	798.602	798.602	798.602
0	PE(18:1p/22:1)-H	PE(40:2p)-H	PE	(18:1p/22:1)	(18:1p)	(22:1)			782.607	C45 H85 O7 N1 P1	7.78247e+06	5.78622e+06	782320	2.19037e+06	1.07344e+06	3.28271e+06	2.36591e+06	863666	1.11305e+06	3.34063e+06	1.15083e+06	3.30667e+06	7.84327e+06	9.07037e+06	2.77632e+06	1.16279e+06	3.76573e+06	1.91712e+07	1.10261e+06	1.68855e+06	1.32245e+07	2.70873e+06	979522	2.44545e+06	4.74627e+06	6.69494e+06	8.68438e+06	336629	4.85452e+06	2.77118e+06	2.10583e+06	212880	5.37491e+06	1.92443e+07	88775.3	5.12533e+06	782.608	782.608	782.607
0	PE(18:1p/22:1)+H	PE(40:2p)+H	PE	(18:1p/22:1)	(18:1p)	(22:1)			784.621	C45 H87 O7 N1 P1	9.63582e+06	4.45289e+06	182390	3.2264e+06	782053	3.04368e+06	3.38266e+06	255574	1.01388e+06	2.74592e+06	1.65414e+06	3.94262e+06	9.51619e+06	9.2948e+06	2.59707e+06	765855	3.71471e+06	3.41215e+07	1.59205e+06	1.63211e+06	1.49162e+07	2.73105e+06	911179	2.17358e+06	5.01641e+06	7.56221e+06	7.30577e+06	299183	4.88652e+06	4.02711e+06	1.62645e+06	451272	5.0018e+06	2.47521e+07	78019.8	5.19879e+06	784.62	784.621	784.621
0	PE(18:1p/22:2)-H	PE(40:3p)-H	PE	(18:1p/22:2)	(18:1p)	(22:2)			780.591	C45 H83 O7 N1 P1	5.85932e+06	1.42323e+06	1.78499e+06	5.416e+06	1.19188e+06	2.57864e+06	6.67295e+06	707951	2.15976e+06	3.09983e+06	1.46482e+06	2.71653e+06	6.79836e+06	5.09057e+06	4.44195e+06	928445	4.38486e+06	1.92428e+07	2.8281e+06	3.19535e+06	1.37432e+07	847784	1.65273e+06	852816	4.20905e+06	3.53818e+06	8.42572e+06	476983	6.38526e+06	2.33506e+06	3.22639e+06	1.51091e+06	5.93972e+06	1.45724e+07	808911	5.80212e+06	780.591	780.592	780.591
0	PE(40:3p)+H	PE(40:3p)+H	PE	(18:1p/22:2)	(18:1p)	(22:2)			782.606	C45 H85 O7 N1 P1	7.80862e+06	3.21231e+06	3.58967e+06	5.38094e+06	1.39432e+06	3.27956e+06	6.30225e+06	725384	1.93615e+06	4.39725e+06	2.21356e+06	3.60595e+06	6.62771e+06	8.92851e+06	4.9263e+06	1.62335e+06	4.236e+06	3.32892e+07	3.18822e+06	4.62825e+06	1.44667e+07	1.32315e+06	1.79217e+06	471538	5.47368e+06	3.94624e+06	9.2042e+06	484659	7.84654e+06	5.54503e+06	3.16018e+06	2.03876e+06	7.56672e+06	1.94245e+07	859543	6.38356e+06	782.606	782.606	782.606
0	PE(18:0p/22:3)+H	PE(40:3p)+H	PE	(18:0p/22:3)	(18:0p)	(22:3)			782.606	C45 H85 O7 N1 P1	530920	115189	0	151817	0	365483	256838	0	0	0	114932	170157	164941	0	146517	0	121454	2.3602e+06	0	0	377830	0	0	116412	162104	179381	152338	0	390660	0	0	0	478775	3.36601e+06	0	180904	782.606	782.606
0	PE(18:0p/22:3)-H	PE(40:3p)-H	PE	(18:0p/22:3)	(18:0p)	(22:3)			780.591	C45 H83 O7 N1 P1	179924	0	0	58629.4	0	173895	0	0	0	0	0	58655.8	182330	0	0	0	70556.7	621363	0	0	141732	0	0	138729	33998.5	8872.45	198178	0	233414	0	0	0	188765	1.36834e+06	0	0	780.591
0	PE(18:0/22:4)-H	PE(40:4)-H	PE	(18:0/22:4)	(18:0)	(22:4)			794.571	C45 H81 O8 N1 P1	6.04314e+07	2.70406e+07	1.83042e+07	4.48454e+07	1.00149e+07	2.8918e+07	5.80468e+07	9.90415e+06	2.27741e+07	3.59557e+07	1.82212e+07	2.95199e+07	6.82452e+07	5.10514e+07	4.48357e+07	1.18789e+07	4.73046e+07	1.75221e+08	2.95525e+07	2.54078e+07	1.44079e+08	9.42399e+06	1.61647e+07	1.29397e+07	4.19335e+07	3.69973e+07	7.62981e+07	4.86665e+06	5.77792e+07	3.21701e+07	2.88023e+07	1.55167e+07	5.87436e+07	1.48653e+08	1.06338e+07	5.6179e+07	794.571	794.572	794.572
0	PE(18:0/22:4)+H	PE(40:4)+H	PE	(18:0/22:4)	(18:0)	(22:4)			796.585	C45 H83 O8 N1 P1	7.30421e+07	3.20474e+07	2.01544e+07	5.70033e+07	1.21593e+07	3.21652e+07	6.77755e+07	1.12939e+07	2.45774e+07	4.40782e+07	2.11169e+07	3.79982e+07	7.95958e+07	6.71281e+07	5.20994e+07	1.46454e+07	5.52949e+07	2.80659e+08	3.51673e+07	3.20894e+07	1.94491e+08	1.07832e+07	1.8148e+07	1.6766e+07	5.21232e+07	4.49518e+07	9.80977e+07	5.62197e+06	7.92439e+07	3.81689e+07	3.33368e+07	1.84425e+07	7.66915e+07	2.15821e+08	1.3365e+07	7.4838e+07	796.585	796.586	796.585
1	PE(18:0e/22:4)-H	PE(40:4e)-H	PE	(18:0e/22:4)	(18:0e)	(22:4)			780.591	C45 H83 O7 N1 P1	6.06504e+06	3.28e+06	1.5713e+06	5.75043e+06	1.1983e+06	2.00794e+06	6.53768e+06	724380	2.0493e+06	3.22297e+06	1.51839e+06	2.61487e+06	6.8028e+06	5.20463e+06	3.50286e+06	766753	4.38486e+06	1.92222e+07	2.79643e+06	3.18939e+06	1.34992e+07	361333	1.59417e+06	897367	3.7532e+06	3.51638e+06	8.2764e+06	475104	6.00241e+06	2.33872e+06	3.18754e+06	1.52962e+06	5.92837e+06	1.4435e+07	806935	5.73005e+06	780.591	780.591	780.59
0	PE(18:0p/22:4)-H	PE(40:4p)-H	PE	(18:0p/22:4)	(18:0p)	(22:4)			778.576	C45 H81 O7 N1 P1	7.40594e+07	3.12184e+07	1.63584e+07	5.09808e+07	1.28103e+07	3.67819e+07	5.53777e+07	9.62011e+06	1.79692e+07	3.05733e+07	1.80415e+07	3.24441e+07	7.22679e+07	6.53753e+07	4.17267e+07	1.23603e+07	5.00031e+07	2.1216e+08	2.88101e+07	2.38163e+07	1.55743e+08	1.20596e+07	1.57829e+07	1.48397e+07	5.42829e+07	5.49746e+07	8.91148e+07	5.83029e+06	3.14406e+06	3.67921e+07	3.26891e+07	1.70806e+07	7.70438e+07	1.9285e+08	8.64245e+06	6.91486e+07	778.576	778.575	778.577
0	PE(18:0p/22:4)+H	PE(40:4p)+H	PE	(18:0p/22:4)	(18:0p)	(22:4)			780.59	C45 H83 O7 N1 P1	8.76522e+07	3.589e+07	2.02119e+07	5.81904e+07	1.51614e+07	4.07318e+07	6.4615e+07	1.14705e+07	2.17313e+07	4.0372e+07	1.92786e+07	36079154	8.75442e+07	7.48702e+07	4.99989e+07	1.52024e+07	5.30683e+07	2.81915e+08	3.43486e+07	3.08251e+07	2.0499e+08	1.4926e+07	1.86373e+07	1.80301e+07	6.60035e+07	6.38525e+07	1.08465e+08	7.3216e+06	8.10398e+07	4.45413e+07	3.46369e+07	1.93975e+07	8.58756e+07	2.66028e+08	1.17491e+07	7.53717e+07	780.59	780.592	780.59
0	PE(18:1/22:4)+H	PE(40:5)+H	PE	(18:1/22:4)	(18:1)	(22:4)			794.569	C45 H81 O8 N1 P1	6.54211e+07	1.58071e+06	1.30658e+07	3.39112e+06	7.81253e+06	1.93541e+07	9.45522e+07	7.2001e+06	2.14025e+07	4.33392e+07	1.39977e+07	2.58559e+06	3.66118e+06	9.6969e+07	6.67849e+07	9.3531e+06	3.70754e+06	2.31248e+08	3.02481e+07	1.3792e+06	2.42625e+08	7.67164e+06	1.68737e+07	1.16023e+07	3.31659e+06	3.20286e+07	7.19725e+06	3.39979e+06	7.57078e+07	3.0778e+07	2.32855e+07	1.48935e+07	4.2699e+06	2.39745e+08	1.09324e+07	5.25235e+06	794.569	794.57	794.569
0	PE(18:1/22:4)-H	PE(40:5)-H	PE	(18:1/22:4)	(18:1)	(22:4)			792.555	C45 H79 O8 N1 P1	3.74619e+07	2.55994e+07	1.38792e+07	3.9213e+07	8.92864e+06	1.51741e+07	5.00881e+07	1.00477e+07	2.42989e+07	4.42249e+07	1.76438e+07	3.08777e+07	6.08486e+07	3.61702e+07	3.98996e+07	1.1499e+07	3.79856e+07	1.16792e+07	2.48347e+07	2.18147e+07	7.12742e+07	7.53728e+06	1.56931e+07	1.41575e+07	2.36734e+07	2.98047e+07	4.25781e+07	4.14438e+06	3.87779e+07	2.87561e+07	1.54922e+07	1.39626e+07	3.29969e+07	1.06765e+08	1.21076e+07	3.61323e+07	792.556	792.555	792.555
0	PE(18:0/22:5)+H	PE(40:5)+H	PE	(18:0/22:5)	(18:0)	(22:5)			794.569	C45 H81 O8 N1 P1	5.99355e+06	2.33091e+06	1.19745e+06	4.12597e+06	558067	2.52713e+06	5.42564e+06	386299	2.20366e+06	4.09656e+06	1.68698e+06	2.34582e+06	7.46352e+06	4.68348e+06	3.73325e+06	184021	3.89485e+06	2.02608e+07	2.07082e+06	2.19138e+06	1.78941e+07	437297	1.52297e+06	1.2077e+06	3.48821e+06	2.56451e+06	7.51217e+06	157496	5.76415e+06	1.86247e+06	2.05269e+06	1.30841e+06	4.92017e+06	1.39451e+07	878438	6.65618e+06	794.569	794.569	794.569
0	PE(40:5e)+H	PE(40:5e)+H	PE	(40:5e)	(40:5e)				780.59	C45 H83 O7 N1 P1	7.338e+06	3.67153e+06	528912	2.01483e+06	1.27191e+06	3.95246e+06	5.5302e+06	318414	1.37342e+06	2.43654e+06	703677	3.14732e+06	5.87219e+06	8.42194e+06	3.02572e+06	1.39703e+06	3.49498e+06	1.37907e+07	1.609e+06	1.95699e+06	1.26962e+07	2.4775e+06	1.25389e+06	1.68272e+06	5.67419e+06	7.35973e+06	6.86798e+06	495700	4.52855e+06	3.74772e+06	1.96068e+06	1.11707e+06	5.92822e+06	1.4629e+07	386033	5.90804e+06	780.588	780.588	780.59
0	PE(18:0p/22:5)-H	PE(40:5p)-H	PE	(18:0p/22:5)	(18:0p)	(22:5)			776.56	C45 H79 O7 N1 P1	6.2054e+07	8.29618e+06	1.51349e+07	5.00313e+07	3.38047e+06	7.56249e+06	5.0533e+07	3.08149e+06	6.8572e+06	1.19833e+07	1.56268e+07	9.22721e+06	6.71802e+07	6.60946e+07	3.90705e+07	1.49012e+07	4.76606e+07	2.00855e+08	2.98546e+07	2.18311e+07	1.35271e+08	1.52977e+07	3.78484e+06	4.01865e+06	5.76083e+07	4.54815e+07	7.53639e+07	7.34741e+06	5.52419e+07	3.00037e+07	2.32393e+07	4.25083e+06	6.56551e+07	1.89253e+08	9.23507e+06	6.44165e+07	776.561	776.562	776.56
0	PE(18:0p/22:5)+H	PE(40:5p)+H	PE	(18:0p/22:5)	(18:0p)	(22:5)			778.575	C45 H81 O7 N1 P1	2.14827e+07	9.89415e+06	1.47835e+07	5.34448e+07	1.27465e+07	9.10225e+06	1.80117e+07	8.95899e+06	2.21427e+07	4.13816e+07	5.97103e+06	1.1365e+07	1.04047e+08	9.44409e+07	1.28879e+07	1.34859e+07	1.01964e+07	3.47534e+08	9.53484e+06	8.38995e+06	2.19638e+08	1.78503e+07	1.75737e+07	1.77175e+07	6.78747e+07	6.19564e+07	2.54374e+07	6.48612e+06	2.09846e+07	9.23696e+06	9.33869e+06	1.6712e+07	8.02941e+07	5.29555e+07	6.8253e+06	1.92978e+07	778.575	778.573	778.573
0	PE(18:0p/22:5)-H	PE(40:5p)-H	PE	(18:0p/22:5)	(18:0p)	(22:5)			776.56	C45 H79 O7 N1 P1	1.17984e+06	550639	146859	584237	0	425822	1.65356e+06	0	558032	599145	139282	374465	1.40541e+06	684261	558288	1523.95	1.04051e+06	3.65066e+06	673849	453645	2.40004e+06	131663	207334	0	646888	661692	1.47579e+06	0	1.446e+06	734974	707239	285065	1.54416e+06	2.7912e+06	0	1.25472e+06	776.56	776.56	776.56
0	PE(18:0/22:6)-H	PE(40:6)-H	PE	(18:0/22:6)	(18:0)	(22:6)			790.539	C45 H77 O8 N1 P1	4.36601e+08	2.10782e+08	1.30411e+08	3.30911e+08	7.74354e+07	1.94141e+08	3.85969e+08	7.95992e+07	2.10458e+08	3.45791e+08	1.43818e+08	2.34605e+08	5.31532e+08	3.86812e+08	3.30347e+08	9.51882e+07	3.22648e+08	9.26304e+08	2.2417e+08	1.90689e+08	9.2136e+08	6.39869e+07	1.34413e+08	1.09265e+08	2.73245e+08	2.3675e+08	5.20794e+08	3.8509e+07	4.63713e+08	2.24505e+08	1.92729e+08	1.1993e+08	3.94718e+08	8.74324e+08	1.03273e+08	4.59054e+08	790.54	790.541	790.541
0	PE(18:0/22:6)+H	PE(40:6)+H	PE	(18:0/22:6)	(18:0)	(22:6)			792.554	C45 H79 O8 N1 P1	8.18711e+08	3.49326e+08	1.90369e+08	5.96745e+08	1.1134e+08	3.17631e+08	7.79658e+08	1.18117e+08	3.46108e+08	6.58001e+08	2.24137e+08	4.14165e+08	2.76703e+06	7.96921e+08	5.52085e+08	1.40468e+08	5.68633e+08	2.16289e+09	3.73199e+08	3.03591e+08	2.07497e+09	9.19878e+07	1.94895e+08	1.63113e+08	4.99159e+08	3.82308e+08	1.15831e+09	5.27169e+07	9.46648e+08	3.83775e+08	3.33052e+08	1.72956e+08	8.07802e+08	1.96791e+09	1.57208e+08	9.60307e+08	792.554	792.554	792.554
1	PE(18:0e/22:6)-H	PE(40:6e)-H	PE	(18:0e/22:6)	(18:0e)	(22:6)			776.56	C45 H79 O7 N1 P1	7.85705e+06	9.21151e+06	1.37492e+06	5.83992e+06	1.79306e+06	3.59012e+06	9.49316e+06	887542	3.0093e+06	4.39285e+06	2.30788e+06	3.57215e+06	1.11312e+07	9.31322e+06	4.38119e+06	1.92818e+06	7.03486e+06	2.62505e+07	2.93536e+06	2.68486e+06	1.94385e+07	1.71825e+06	1.67445e+06	2.18403e+06	6.42113e+06	6.52322e+06	9.81851e+06	143907	9.80423e+06	5.07056e+06	2.97777e+06	2.78486e+06	7.67346e+06	1.96772e+07	1.32666e+06	8.2453e+06	776.56	776.56	776.56
0	PE(40:6e)+H	PE(40:6e)+H	PE	(40:6e)	(40:6e)				778.575	C45 H81 O7 N1 P1	9.46265e+06	7.42549e+06	1.03194e+07	1.33855e+07	1.35523e+06	4.77548e+06	3.24466e+06	9.01443e+06	9.52229e+06	1.18814e+07	2.33957e+06	5.08303e+06	1.1128e+07	1.6475e+07	4.21979e+06	2.10327e+06	1.66921e+07	2.54934e+07	2.31531e+06	1.41814e+06	1.92053e+07	3.5234e+06	1.82747e+06	2.76444e+06	7.33457e+06	1.18835e+07	7.50514e+06	5.25245e+06	6.77521e+06	4.8806e+06	3.53328e+06	6.48064e+06	8.21441e+06	1.9384e+07	640737	6.86165e+06	778.571	778.57	778.575
0	PE(18:1p/22:5)-H	PE(40:6p)-H	PE	(18:1p/22:5)	(18:1p)	(22:5)			774.544	C45 H77 O7 N1 P1	2.46379e+06	1.3333e+06	326787	1.48635e+06	246359	1.51369e+06	2.00694e+06	379855	161259	1.23328e+06	395199	2.34228e+06	4.83279e+06	3.57363e+06	1.58645e+06	653747	2.19574e+06	1.10759e+07	1.32971e+06	757420	7.98956e+06	611276	527155	1.08035e+06	2.43789e+06	2.7773e+06	4.22899e+06	113028	2.40217e+06	2.50773e+06	1.2321e+06	247391	2.84775e+06	3.12796e+06	231340	2.55809e+06	774.544	774.544	774.544
0	PE(18:1p/22:5)+H	PE(40:6p)+H	PE	(18:1p/22:5)	(18:1p)	(22:5)			776.559	C45 H79 O7 N1 P1	3.3407e+06	1.56878e+06	159921	2.32607e+06	236134	3.81319e+06	2.98727e+06	452846	147029	2.40404e+06	728072	1.23044e+06	4.86464e+06	4.93832e+06	2.35323e+06	350229	3.36345e+06	1.45655e+07	2.06741e+06	1.56947e+06	1.0803e+07	913902	778730	662794	3.10141e+06	2.71022e+06	4.41374e+06	256744	6.34136e+06	2.12514e+06	1.01889e+06	259921	3.1158e+06	1.3632e+07	104271	2.97881e+06	776.559	776.559	776.559
0	PE(18:0p/22:6)-H	PE(40:6p)-H	PE	(18:0p/22:6)	(18:0p)	(22:6)			774.544	C45 H77 O7 N1 P1	2.90692e+08	1.39398e+08	7.8895e+07	2.2232e+08	4.90901e+07	1.33971e+08	2.52753e+08	4.5113e+07	1.25477e+08	2.04045e+08	8.02679e+07	1.36616e+08	3.40252e+08	2.53568e+08	1.81321e+08	5.10775e+07	2.01664e+08	6.84178e+08	1.32042e+08	1.06965e+08	6.26711e+08	3.74965e+07	7.34244e+07	6.1605e+07	1.86756e+08	1.61625e+08	3.27522e+08	2.11789e+07	2.90363e+08	1.5066e+08	1.27771e+08	7.21814e+07	2.75955e+08	6.31196e+08	5.53274e+07	2.81766e+08	774.546	774.545	774.546
0	PE(18:0p/22:6)+H	PE(40:6p)+H	PE	(18:0p/22:6)	(18:0p)	(22:6)			776.559	C45 H79 O7 N1 P1	3.90796e+08	1.64125e+08	9.18843e+07	2.81409e+08	5.61743e+07	1.53994e+08	3.22003e+08	5.35523e+07	1.44035e+08	2.60094e+08	9.49349e+07	1.75203e+08	4.5519e+08	3.37755e+08	2.17792e+08	5.851e+07	2.56349e+08	1.3222e+09	1.59687e+08	1.31287e+08	1.00408e+09	4.45985e+07	8.35219e+07	7.10877e+07	2.45335e+08	1.90839e+08	4.7903e+08	2.30097e+07	3.83436e+08	1.66745e+08	1.58376e+08	8.06158e+07	3.8475e+08	1.12365e+09	6.22709e+07	3.94003e+08	776.559	776.559	776.558
0	PE(18:1/22:6)-H	PE(40:7)-H	PE	(18:1/22:6)	(18:1)	(22:6)			788.524	C45 H75 O8 N1 P1	2.74995e+07	1.35593e+07	7.22805e+06	2.06819e+07	3.96092e+06	1.17758e+07	2.54033e+07	4.91834e+06	1.22336e+07	2.21114e+07	8.01856e+06	1.52781e+07	3.73095e+07	2.79202e+07	1.73656e+07	5.28779e+06	2.04662e+07	7.12399e+07	1.30281e+07	1.11764e+07	6.47213e+07	4.44835e+06	6.77698e+06	6.53349e+06	1.59931e+07	1.34892e+07	3.25775e+07	2.18487e+06	2.55249e+07	1.50195e+07	1.23563e+07	6.92559e+06	2.6895e+07	6.83999e+07	4.79368e+06	2.99264e+07	788.524	788.524	788.525
0	PE(18:1/22:6)+H	PE(40:7)+H	PE	(18:1/22:6)	(18:1)	(22:6)			790.538	C45 H77 O8 N1 P1	4.43444e+07	2.19469e+07	1.0996e+07	3.40616e+07	6.443e+06	1.90033e+07	3.51327e+07	7.62196e+06	1.85529e+07	3.71102e+07	1.14008e+07	2.2067e+07	5.46956e+07	4.19711e+07	2.51337e+07	6.85457e+06	2.95453e+07	1.54565e+08	2.15651e+07	1.69444e+07	1.1154e+08	6.87576e+06	1.08479e+07	8.64058e+06	2.50365e+07	2.27145e+07	5.00306e+07	3.5174e+06	4.17728e+07	2.15791e+07	1.77001e+07	1.06866e+07	4.12103e+07	1.17515e+08	7.52223e+06	4.54185e+07	790.538	790.538	790.538
0	PE(20:3/20:4)+H	PE(40:7)+H	PE	(20:3/20:4)	(20:3)	(20:4)			790.538	C45 H77 O8 N1 P1	1.81677e+06	2.94568e+06	960297	1.94611e+06	804300	1.34962e+06	2.76234e+06	567559	1.43958e+06	1.85347e+06	1.22489e+06	2.14919e+06	2.42096e+06	2.83549e+06	2.18632e+06	1.04502e+06	1.72615e+06	3.19791e+06	1.3147e+06	938070	2.54588e+06	1.15683e+06	922221	935640	2.72679e+06	2.21254e+06	3.26171e+06	221971	3.07635e+06	1.51249e+06	1.0561e+06	534506	2.69256e+06	1.98764e+06	380260	1.952e+06	790.538	790.532	790.538
0	PE(18:1p/22:6)-H	PE(40:7p)-H	PE	(18:1p/22:6)	(18:1p)	(22:6)			772.529	C45 H75 O7 N1 P1	6.30233e+07	3.35398e+07	1.50799e+07	4.92336e+07	9.8785e+06	2.98036e+07	5.74843e+07	1.07012e+07	2.60368e+07	4.58753e+07	1.6276e+07	3.26411e+07	7.40672e+07	6.08456e+07	4.40848e+07	1.07835e+07	4.4725e+07	1.60806e+08	2.76858e+07	2.28971e+07	1.36966e+08	1.08645e+07	1.69889e+07	1.35245e+07	4.43055e+07	4.09101e+07	7.03633e+07	5.02779e+06	6.20598e+07	3.21857e+07	2.72858e+07	1.59622e+07	6.32085e+07	1.40391e+08	1.13315e+07	6.36058e+07	772.529	772.53	772.53
0	PE(18:1p/22:6)+H	PE(40:7p)+H	PE	(18:1p/22:6)	(18:1p)	(22:6)			774.543	C45 H77 O7 N1 P1	1.0564e+08	5.28952e+07	2.33089e+07	7.20233e+07	1.46983e+07	4.58688e+07	9.55799e+07	1.84277e+07	3.71385e+07	7.51392e+07	2.36353e+07	5.40379e+07	1.54481e+08	1.00339e+08	6.77018e+07	1.68373e+07	7.42803e+07	3.95656e+08	4.51465e+07	3.79736e+07	1.61212e+06	69813.1	2.31182e+07	2.16849e+07	6.87374e+07	6.26047e+07	1.25566e+08	7.29249e+06	1.05638e+08	5.15479e+07	5.28523e+07	2.40129e+07	1.00148e+08	3.29325e+08	1.54687e+07	1.11804e+08	774.543	774.543	774.544
0	PE(40:7p)+H	PE(40:7p)+H	PE	(40:7p)	(40:7p)				774.543	C45 H77 O7 N1 P1	1.0322e+07	7.53915e+06	4.8157e+06	1.0444e+07	2.84685e+06	6.58631e+06	1.25192e+07	2.66769e+06	5.31919e+06	1.33913e+07	4.64647e+06	8.25275e+06	1.21529e+07	9.14241e+06	8.90038e+06	3.53615e+06	1.1202e+07	1.47661e+07	6.4844e+06	8.79024e+06	2.03247e+07	3.73396e+06	4.33908e+06	4.45559e+06	9.44667e+06	7.52976e+06	1.37925e+07	1.49231e+06	1.07279e+07	8.52954e+06	6.86406e+06	4.39883e+06	9.96708e+06	2.11316e+07	2.0337e+06	1.11977e+07	774.543	774.543	774.543
0	PE(20:4/20:4)+H	PE(40:8)+H	PE	(20:4/20:4)	(20:4)	(20:4)			788.522	C45 H75 O8 N1 P1	2.16844e+06	648419	112969	1.03141e+06	133676	561018	1.56027e+06	0	438413	1.12163e+06	488758	318206	1.94321e+06	1.68995e+06	687044	245354	620562	5.90734e+06	346539	442426	3.91662e+06	0	161781	126414	573620	339599	1.56034e+06	0	2.06169e+06	790957	490046	85195.4	1.58965e+06	3.79515e+06	1805.72	1.12793e+06	788.523	788.522	788.522
0	PE(20:4/20:4)-H	PE(40:8)-H	PE	(20:4/20:4)	(20:4)	(20:4)			786.508	C45 H73 O8 N1 P1	994764	360406	0	716535	0	114975	455245	0	361867	631919	219838	185729	1.0626e+06	936755	436608	0	389348	2.62959e+06	395506	203944	2.12677e+06	158132	154858	0	219373	215060	893332	0	987053	440506	161168	68497.8	687224	1.93795e+06	70345	436182	786.509	786.508
0	PE(18:2p/22:6)-H	PE(40:8p)-H	PE	(18:2p/22:6)	(18:2p)	(22:6)			770.513	C45 H73 O7 N1 P1	1.05756e+06	177674	0	407745	0	126309	625883	0	190056	290805	70558	346805	1.06427e+06	905031	393539	0	207781	2.9956e+06	258855	151261	3.23331e+06	0	70193.5	75684.7	315689	246857	768465	0	623239	287527	286384	77351.1	532357	2.04723e+06	0	660004	770.513	770.513
0	PE(18:2p/22:6)+H	PE(40:8p)+H	PE	(18:2p/22:6)	(18:2p)	(22:6)			772.528	C45 H75 O7 N1 P1	1.47198e+06	640664	0	921384	0	253678	1.30148e+06	0	388193	1.15672e+06	68599.8	582893	1.58981e+06	788077	762447	0	806044	3.99165e+06	128223	3997.14	3.29267e+06	0	176485	0	773319	649813	928887	0	1.73777e+06	640447	323506	153022	1.06779e+06	2.93473e+06	0	1.56529e+06	772.528	772.528
0	PE(40:8p)+H	PE(40:8p)+H	PE	(40:8p)	(40:8p)				772.528	C45 H75 O7 N1 P1	1.15662e+07	6.72942e+06	1.10335e+06	8.29758e+06	2.45358e+06	5.12709e+06	1.05149e+07	1.39188e+06	3.59752e+06	7.75212e+06	3.48107e+06	6.20088e+06	1.20095e+07	1.21405e+07	8.58751e+06	2.31844e+06	9.0962e+06	2.21763e+07	5.18451e+06	5.01469e+06	1.80382e+07	3.17776e+06	3.0534e+06	2.85429e+06	3.27086e+06	8.63749e+06	1.27046e+07	746412	8.77619e+06	6.35792e+06	4.8994e+06	3.61864e+06	1.06844e+07	1.78263e+07	1.34537e+06	1.02642e+07	772.528	772.525	772.525
0	PE(40:9)+H	PE(40:9)+H	PE	(40:9)	(40:9)				786.507	C45 H73 O8 N1 P1	1.5798e+07	9.61818e+06	5.4153e+06	1.44909e+07	2.72896e+06	8.86089e+06	1.38866e+07	4.09005e+06	9.86393e+06	1.57233e+07	6.51812e+06	1.05935e+07	1.71799e+07	1.60507e+07	1.13867e+07	4.31061e+06	1.11272e+07	3.10097e+07	9.22073e+06	8.19031e+06	2.69176e+07	3.04509e+06	5.60474e+06	4.54023e+06	1.01615e+07	1.05502e+07	2.2249e+07	2.09592e+06	1.8635e+07	9.81285e+06	8.31364e+06	6.35424e+06	1.42766e+07	2.95546e+07	4.27187e+06	1.75848e+07	786.507	786.507	786.505
0	PE(18:1p/23:1)-H	PE(41:2p)-H	PE	(18:1p/23:1)	(18:1p)	(23:1)			796.623	C46 H87 O7 N1 P1	899851	173888	0	101445	0	66589.5	107300	0	0	3080.35	0	151387	280333	870433	0	0	114625	2.03446e+06	0	58867.6	881316	0	0	942.664	278048	397312	440213	0	172019	0	0	0	537574	1.61541e+06	0	130755	796.623	796.623
0	PE(19:0/22:6)+H	PE(41:6)+H	PE	(19:0/22:6)	(19:0)	(22:6)			806.569	C46 H81 O8 N1 P1	0	0	0	273830	0	0	291058	0	256890	76268.6	0	256710	770424	453467	0	0	186169	2.70554e+06	61752.9	0	1.30023e+06	0	0	0	191473	130200	599341	0	450906	62588.2	79619.5	0	559513	1.31838e+06	0	339386
0	PE(20:4/22:6)-H	PE(42:10)-H	PE	(20:4/22:6)	(20:4)	(22:6)			810.508	C47 H73 O8 N1 P1	881448	156014	86894.5	1.16223e+06	0	570258	831608	77798.4	157210	913485	101798	228821	1.56452e+06	1.03844e+06	649822	0	673122	3.95304e+06	491806	474479	2.69158e+06	0	0	112841	425969	368658	1.79215e+06	0	1.94758e+06	499026	233788	124467	182254	2.60155e+06	0	1.62077e+06	810.508	810.508	810.508
0	PE(20:4/22:6)+H	PE(42:10)+H	PE	(20:4/22:6)	(20:4)	(22:6)			812.522	C47 H75 O8 N1 P1	3.84723e+06	1.33531e+06	270785	2.42401e+06	0	693619	2.4339e+06	0	741219	1.59163e+06	817157	1.04867e+06	3.8498e+06	2.93184e+06	2.58804e+06	569275	2.56721e+06	7.41165e+06	1.16841e+06	1.305e+06	8.4909e+06	182789	166293	354153	871733	1.3236e+06	3.16696e+06	0	4.13792e+06	1.70211e+06	1.75946e+06	225074	2.43247e+06	8.53918e+06	0	4.3963e+06	812.523	812.521	812.522
0	PE(42:10)+H	PE(42:10)+H	PE	(42:10)	(42:10)				812.522	C47 H75 O8 N1 P1	5.07188e+06	2.02447e+06	995749	2.44398e+06	287529	1.36162e+06	2.96909e+06	1.16654e+06	2.00569e+06	3.38325e+06	1.16952e+06	1.71607e+06	5.3347e+06	4.67026e+06	2.06099e+06	830580	2.5669e+06	9.18841e+06	2.24084e+06	1.81081e+06	6.57998e+06	781028	802610	1.04375e+06	2.35075e+06	1.97198e+06	5.10815e+06	89233.1	3.13172e+06	2.10337e+06	1.7261e+06	1.41402e+06	3.51256e+06	6.37469e+06	434339	3.71039e+06	812.522	812.522	812.522
0	PE(18:0p/24:1)-H	PE(42:1p)-H	PE	(18:0p/24:1)	(18:0p)	(24:1)			812.654	C47 H91 O7 N1 P1	0	0	0	0	0	0	0	0	0	0	0	42063.1	94219.9	54804.2	0	0	0	489870	0	0	749772	0	0	0	0	86006.2	85852.6	0	40390	44731.1	0	0	68620.2	528873	0	76022.8
0	PE(18:1p/24:1)-H	PE(42:2p)-H	PE	(18:1p/24:1)	(18:1p)	(24:1)			810.638	C47 H89 O7 N1 P1	1.07151e+06	3818.56	0	71719.9	0	624778	3751.13	0	104167	1963.47	0	4100.18	942055	553922	349219	0	5450.65	3.61953e+06	0	3079.43	2.60544e+06	2793.81	286.795	0	90735.5	972323	343636	0	275839	195508	3899.79	0	294952	3.47515e+06	0	623690	810.638	810.638
0	PE(18:1p/24:1)+H	PE(42:2p)+H	PE	(18:1p/24:1)	(18:1p)	(24:1)			812.653	C47 H91 O7 N1 P1	1.06488e+07	3.96812e+06	2.37831e+06	5.18986e+06	1.99526e+06	4.18281e+06	6.29643e+06	1.84873e+06	2.93363e+06	4.76789e+06	2.3128e+06	3.88771e+06	1.40571e+07	8.69842e+06	5.56932e+06	1.89417e+06	5.71225e+06	3.09712e+07	3.78209e+06	4.14903e+06	2.65996e+07	1.83772e+06	2.47175e+06	2.02169e+06	5.95333e+06	4.95395e+06	1.2582e+07	764060	9.52577e+06	5.41139e+06	5.0752e+06	3.30973e+06	9.46016e+06	2.92725e+07	1.38317e+06	1.17371e+07	812.655	812.656	812.653
0	PE(20:1/22:3)-H	PE(42:4)-H	PE	(20:1/22:3)	(20:1)	(22:3)			822.602	C47 H85 O8 N1 P1	2.72427e+06	614128	777372	2.17366e+06	147744	562599	1.8593e+06	0	509848	1.38682e+06	381499	1.31266e+06	2.45674e+06	2.59899e+06	1.31612e+06	713.33	2.22602e+06	6.64721e+06	645683	394912	6.36569e+06	246036	304464	198965	2.07682e+06	1.57374e+06	2.1858e+06	0	2.55188e+06	736275	782076	104534	713221	6.87369e+06	0	2.73387e+06	822.602	822.602	822.602
0	PE(42:4)+H	PE(42:4)+H	PE	(20:1/22:3)	(20:1)	(22:3)			824.616	C47 H87 O8 N1 P1	1.48926e+06	2270.95	531924	1.03797e+06	0	738666	0	0	526713	1.08037e+06	3584.9	2956.01	3.07996e+06	4972.95	1.29116e+06	0	695104	1.03478e+07	926112	10482.7	8.42866e+06	0	382934	545.364	785701	503238	3.59795e+06	0	2.72075e+06	0	873714	0	2.32254e+06	7.93927e+06	0	2.8254e+06	824.616	824.616	824.616
0	PE(20:0/22:6)-H	PE(42:6)-H	PE	(20:0/22:6)	(20:0)	(22:6)			818.571	C47 H81 O8 N1 P1	288321	1015.26	0	3005.87	0	86181.4	962.271	0	0	0	0	0	3996.1	207953	0	0	1089.84	1.19069e+06	0	109800	2986.48	0	0	0	0	57799.1	4103.87	0	460875	0	0	0	227360	343276	0	107119	818.571	818.571
0	PE(42:6e)+H	PE(42:6e)+H	PE	(42:6e)	(42:6e)				806.606	C47 H85 O7 N1 P1	339331	232418	0	121571	0	0	168259	0	0	0	0	131629	715110	1.75847e+06	144536	0	41655	2.552e+06	0	0	1.70067e+06	0	0	121742	257364	982698	589733	0	210259	139592	163311	0	521214	2.62798e+06	0	240326	806.606	806.606
0	PE(20:0p/22:6)-H	PE(42:6p)-H	PE	(20:0p/22:6)	(20:0p)	(22:6)			802.576	C47 H81 O7 N1 P1	3.1684e+06	1.40543e+06	392378	1.92575e+06	189074	1.07263e+06	2.33156e+06	384977	905709	1.3831e+06	537677	1.1745e+06	2.91881e+06	2.17612e+06	1.98303e+06	397013	1.41417e+06	8.08159e+06	1.51323e+06	996932	6.68211e+06	120809	529164	2899.27	2.13276e+06	1.71476e+06	3.06022e+06	0	2.71294e+06	1.29953e+06	1.25061e+06	659635	2.73013e+06	7.1746e+06	293947	2.54892e+06	802.577	802.576	802.576
0	PE(20:0p/22:6)+H	PE(42:6p)+H	PE	(20:0p/22:6)	(20:0p)	(22:6)			804.59	C47 H83 O7 N1 P1	3.41716e+06	851060	567513	2.19957e+06	3765.64	1.4544e+06	2.707e+06	0	1.02281e+06	2.16198e+06	604535	1.43532e+06	4.14808e+06	1.29857e+06	2.29369e+06	189302	2.0938e+06	3.73585e+06	1.23525e+06	552513	7.94372e+06	288176	288188	0	1.92622e+06	1.8001e+06	3.56139e+06	0	2.49304e+06	1.27533e+06	917951	720046	3.08719e+06	8.60013e+06	226196	3.56102e+06	804.59		804.59
0	PE(20:1/22:6)-H	PE(42:7)-H	PE	(20:1/22:6)	(20:1)	(22:6)			816.555	C47 H79 O8 N1 P1	1.10647e+06	582454	198679	1.53335e+06	64888.5	246850	1.03317e+06	0	536779	893073	266083	675263	1.90804e+06	1.09606e+06	1.18166e+06	124938	1.63937e+06	4.1715e+06	479873	7888.97	3.41709e+06	114266	434615	256425	1.00471e+06	641566	1.55223e+06	0	1.40081e+06	675377	339361	137380	1.36745e+06	3.42468e+06	0	1.93931e+06	816.555	816.555	816.555
0	PE(20:1/22:6)+H	PE(42:7)+H	PE	(20:1/22:6)	(20:1)	(22:6)			818.569	C47 H81 O8 N1 P1	2.18239e+06	526615	368517	1.07644e+06	0	587536	1.86019e+06	423257	380584	1.5772e+06	357793	607411	2.56987e+06	1.67628e+06	900106	1451.26	1.44717e+06	6.42907e+06	1.18364e+06	993534	4.51622e+06	1675.45	349936	90763.7	1.29808e+06	845031	2.68319e+06	2225.03	1.52319e+06	582399	867900	266886	1.61403e+06	4.00529e+06	83585.8	1.7965e+06	818.569	818.569	818.569
0	PE(42:7)+H	PE(42:7)+H	PE	(42:7)	(42:7)				818.569	C47 H81 O8 N1 P1	7.54424e+06	5.11245e+06	2.80713e+06	6.28239e+06	1.35382e+06	3.61572e+06	8.62179e+06	1.82846e+06	3.38441e+06	5.10383e+06	2.75453e+06	4.10223e+06	8.11448e+06	7.0545e+06	6.29557e+06	1.94398e+06	5.98656e+06	1.83748e+07	4.18502e+06	3.64053e+06	1.5296e+07	629124	2.88009e+06	2.14131e+06	5.49901e+06	4.93948e+06	1.0452e+07	591360	8.60822e+06	4.84325e+06	3.8618e+06	2.24353e+06	9.42176e+06	1.52705e+07	1.41468e+06	7.13841e+06	818.569	818.566	818.568
0	PE(20:1p/22:6)-H	PE(42:7p)-H	PE	(20:1p/22:6)	(20:1p)	(22:6)			800.56	C47 H79 O7 N1 P1	255789	150487	0	130976	0	0	745689	0	327020	446480	0	290734	1.24632e+06	168737	383441	99230.3	780211	2.51047e+06	548862	730.001	2.17462e+06	0	0	0	725842	280902	1.16649e+06	0	347115	263471	237451	126826	1.21359e+06	3.05172e+06	0	1.00236e+06	800.56	800.56
0	PE(42:7p)+H	PE(42:7p)+H	PE	(42:7p)	(42:7p)				802.575	C47 H81 O7 N1 P1	9.42396e+06	4.1684e+06	2.50595e+06	7.93148e+06	2.10555e+06	5.70898e+06	8.06753e+06	945218	2.6672e+06	5.44604e+06	2.67287e+06	5.59681e+06	9.67604e+06	8.59118e+06	6.84393e+06	2.16916e+06	6.86927e+06	2.37769e+07	4.65198e+06	3.92739e+06	1.93352e+07	2.69607e+06	2.3475e+06	2.67817e+06	8.48404e+06	7.92233e+06	1.22734e+07	1.42572e+06	9.2298e+06	6.10727e+06	4.81774e+06	2.98322e+06	1.09732e+07	2.08596e+07	1.7573e+06	1.02739e+07	802.572	802.572	802.572
0	PE(20:2/22:6)-H	PE(42:8)-H	PE	(20:2/22:6)	(20:2)	(22:6)			814.539	C47 H77 O8 N1 P1	0	0	0	109645	0	0	233674	0	0	0	0	0	0	0	163433	0	0	1.8245e+06	102993	0	601880	0	0	0	0	0	267792	0	0	0	102380	0	200928	522989	0	0
0	PE(20:2/22:6)+H	PE(42:8)+H	PE	(20:2/22:6)	(20:2)	(22:6)			816.554	C47 H79 O8 N1 P1	2.56894e+06	609033	188775	1.15734e+06	0	368731	1.61152e+06	0	280601	1.23868e+06	133930	1.24766e+06	3.15874e+06	2.48273e+06	750138	127705	1.0974e+06	6.8614e+06	4679.12	847396	7.19915e+06	0	136657	334709	1.33134e+06	873367	2.32632e+06	0	527048	446563	189579	2598.58	1.77083e+06	970799	0	1.68283e+06	816.554	816.554	816.554
0	PE(20:3/22:6)-H	PE(42:9)-H	PE	(20:3/22:6)	(20:3)	(22:6)			812.524	C47 H75 O8 N1 P1	288871	153744	0	189174	0	0	414956	0	79148.6	150224	0	81650.1	462633	176190	0	0	0	1.43127e+06	101024	1382.07	1.92093e+06	0	0	0	96492.7	260977	576415	76131.2	529537	322603	122569	0	618208	1.096e+06	0	465065	812.524	812.524
0	PE(20:3/22:6)+H	PE(42:9)+H	PE	(20:3/22:6)	(20:3)	(22:6)			814.538	C47 H77 O8 N1 P1	606335	186324	0	672760	85508.3	242327	925447	98324.5	0	566996	91393.3	217635	837968	644502	667724	85043.2	510595	2.47306e+06	0	242761	1.80517e+06	87802.5	0	108926	367854	130336	1.20569e+06	0	812953	97524.5	227611	252767	504185	1.99563e+06	0	901889	814.538	814.538
0	PE(42:9)+H	PE(42:9)+H	PE	(42:9)	(42:9)				814.538	C47 H77 O8 N1 P1	2.99467e+07	2.25569e+07	1.65252e+07	3.119e+07	9.02206e+06	2.24683e+07	3.51783e+07	1.03092e+07	2.09148e+07	3.47735e+07	1.77118e+07	2.3668e+07	3.87633e+07	3.42765e+07	2.85931e+07	1.44246e+07	3.0611e+07	3.41611e+07	2.32523e+07	2.32677e+07	3.79741e+07	1.10872e+07	1.73164e+07	1.42822e+07	2.54951e+07	2.15502e+07	3.84291e+07	6.42405e+06	3.73205e+07	2.59627e+07	2.01045e+07	1.54941e+07	3.31719e+07	3.89523e+07	1.41664e+07	3.75301e+07	814.535	814.535	814.536
0	PE(22:4/22:6)-H	PE(44:10)-H	PE	(22:4/22:6)	(22:4)	(22:6)			838.539	C49 H77 O8 N1 P1	2.11782e+06	805849	330224	1.63215e+06	50814.3	857515	1.42134e+06	0	587438	1.20514e+06	337971	681053	2.67386e+06	1.80741e+06	1.36249e+06	304122	1.35188e+06	6.07916e+06	1.88849e+06	828586	5.04974e+06	114268	403796	513145	1.61136e+06	1.21676e+06	2.41123e+06	219901	2.73411e+06	794475	1.05303e+06	463153	2.11332e+06	5.30135e+06	305383	2.55687e+06	838.539	838.539	838.539
0	PE(22:4/22:6)+H	PE(44:10)+H	PE	(22:4/22:6)	(22:4)	(22:6)			840.554	C49 H79 O8 N1 P1	3.30115e+06	1.23747e+06	531366	2.52846e+06	238172	2.26357e+06	2.38965e+06	301049	934098	1.54107e+06	460447	1.51681e+06	3.74036e+06	3.13769e+06	2.12035e+06	481763	2.24343e+06	1.09693e+07	1.2071e+06	1.19799e+06	7.34798e+06	300691	269619	441821	1.88562e+06	1.73094e+06	4.75308e+06	93211.5	3.02641e+06	1.64285e+06	1.49359e+06	1.0582e+06	3.63606e+06	9.52567e+06	381359	4.67013e+06	840.554	840.554	840.554
0	PE(22:6/22:6)-H	PE(44:12)-H	PE	(22:6/22:6)	(22:6)	(22:6)			834.508	C49 H73 O8 N1 P1	1.41521e+06	655136	273607	1.22313e+06	1023.39	973545	1.54589e+06	204490	355844	1.28713e+06	377954	603479	2.22112e+06	1.78684e+06	1.09756e+06	995.958	1.06865e+06	4.8803e+06	1.03464e+06	828908	4.21167e+06	149453	193323	203360	865710	730999	2.41321e+06	0	2.23492e+06	789949	583508	288912	1.40878e+06	4.4372e+06	222787	2.26772e+06	834.509	834.508	834.508
0	PE(22:6/22:6)+H	PE(44:12)+H	PE	(22:6/22:6)	(22:6)	(22:6)			836.522	C49 H75 O8 N1 P1	2.91588e+06	1.27248e+06	490725	2.75152e+06	392357	1.48032e+06	1.94504e+06	389913	1.20829e+06	2.04666e+06	542452	1.16681e+06	3.57121e+06	3.34397e+06	2.07366e+06	555519	2.05137e+06	8.56726e+06	1.76799e+06	1.05914e+06	7.55145e+06	116518	816623	598724	1.52798e+06	1.69674e+06	3.89773e+06	203098	3.30425e+06	1.36256e+06	1.13893e+06	282406	2.528e+06	7.40069e+06	280522	3.90983e+06	836.522	836.522	836.522
0	PE(22:6/22:6)+H	PE(44:12)+H	PE	(22:6/22:6)	(22:6)	(22:6)			836.522	C49 H75 O8 N1 P1	3.50328e+06	5.40883e+06	3.93273e+06	4.34483e+06	4.73461e+06	3.61214e+06	4.6474e+06	3.29736e+06	6.52371e+06	3.81712e+06	3.89251e+06	3.19696e+06	1.93178e+06	8427.67	1.83299e+06	5.14856e+06	5.16963e+06	262720	3.77882e+06	3.61578e+06	1.14486e+06	3.74414e+06	4.53706e+06	4.90267e+06	4.50761e+06	2.32461e+06	2.26465e+06	2.26024e+06	4.17278e+06	3.58994e+06	6.59447e+06	3.64442e+06	3.25795e+06	1.2281e+06	3.26758e+06	1.9324e+06	836.522	836.522	836.522
0	PEt(16:0/16:0)-H	PEt(32:0)-H	PEt	(16:0/16:0)	(16:0)	(16:0)			675.497	C37 H72 O8 N0 P1	952413	1.33753e+06	1.41399e+06	1.21455e+06	698635	96085	736604	1.10486e+06	753558	1.38953e+06	2.4602e+06	1.98666e+06	536077	542850	663092	1.01531e+06	1.48735e+06	147392	815321	1.23311e+06	191604	1.25732e+06	114344	1.20547e+06	1.1476e+06	770763	982166	591172	1.71291e+06	1.42527e+06	1.82208e+06	97700.6	1.48617e+06	992719	1.62164e+06	1.34034e+06	675.497	675.497	675.497
0	PEt(18:0/16:0)-H	PEt(34:0)-H	PEt	(18:0/16:0)	(18:0)	(16:0)			703.528	C39 H76 O8 N0 P1	2.39657e+06	2.03209e+06	2.00433e+06	2.27855e+06	1.10166e+06	165162	3.12557e+06	2.57113e+06	1.71108e+06	3.29765e+06	3.77908e+06	2.80737e+06	1.12522e+06	1.34308e+06	3.0011e+06	861417	1.84855e+06	573573	1.06131e+06	2.46866e+06	1.62716e+06	5.98893e+06	358725	1.87958e+06	3.21383e+06	903856	1.41345e+06	1.0058e+06	3.72489e+06	1.29494e+06	2.20604e+06	1.25694e+06	3.56505e+06	1.26946e+06	3.64694e+06	3.10029e+06	703.528	703.528	703.528
0	PEt(16:1/18:1)-H	PEt(34:2)-H	PEt	(16:1/18:1)	(16:1)	(18:1)			699.497	C39 H72 O8 N0 P1	1.69458e+06	259396	0	131861	89959.1	142104	0	0	0	265634	2139.14	2813.51	801525	539671	306459	126529	570705	2.34181e+06	581157	187959	2.80057e+06	0	5262.27	148952	184117	406806	968272	0	431012	234536	0	833855	180669	1.93944e+06	0	230438	699.497	699.497
0	PEt(20:0/16:0)-H	PEt(36:0)-H	PEt	(20:0/16:0)	(20:0)	(16:0)			731.56	C41 H80 O8 N0 P1	3.11558e+06	1.05816e+06	4.17623e+06	2.09563e+06	1.40803e+06	206446	1.08985e+06	1.05908e+06	1.28117e+06	2.54438e+06	3.06041e+06	1.81496e+06	4.65972e+06	1.44371e+06	1.78929e+06	4.29671e+06	1.39054e+06	4.59063e+06	2.81368e+06	2.36323e+06	4.51095e+06	1.19859e+06	861074	757014	1.7578e+06	1.03203e+06	1.58057e+06	719066	2.97232e+06	1.14739e+06	5.59818e+06	551359	4.93813e+06	2.77223e+06	4.52807e+06	2.42846e+06	731.56	731.561	731.56
0	PG(32:1)-H	PG(32:1)-H	PG	(32:1)	(32:1)				719.487	C38 H72 O10 N0 P1	428191	330726	0	1786.87	0	6527.94	0	0	0	0	0	1110.3	1.12767e+06	474059	359713	89575.7	494404	1.62387e+06	220418	140537	761123	0	0	0	454280	185931	188051	0	162273	101984	0	184587	85188.6	1.9508e+06	3000.89	175054	719.487	719.487
0	PG(33:1)+NH4	PG(33:1)+NH4	PG	(33:1)	(33:1)				752.544	C39 H79 O10 N1 P1	9.41245e+06	274985	108655	132463	62852.2	283444	179124	263145	1.66568e+06	282152	265499	521275	1.29214e+07	326902	372347	317792	341141	5.33078e+06	335084	98922	2.78643e+07	640240	108729	61430.3	317381	314683	1.08302e+07	191355	308502	326945	152711	118897	441309	3.63943e+06	74107.1	678485	752.544	752.544	752.544
0	PG(34:1)-H	PG(34:1)-H	PG	(34:1)	(34:1)				747.518	C40 H76 O10 N0 P1	528060	122744	0	1274.31	0	1.14781e+06	2409.25	0	110120	1976.62	127008	10776.3	2.00438e+06	309847	605385	297001	864697	2.48098e+06	837402	129117	2.88053e+06	0	2694.52	122392	782181	337839	331301	70621.7	143464	2794.01	125557	820430	489970	2.2654e+06	0	522730	747.518	747.518
0	PG(16:0/20:4)-H	PG(36:4)-H	PG	(16:0/20:4)	(16:0)	(20:4)			769.503	C42 H74 O10 N0 P1	445669	122235	0	424893	0	96152.2	479551	83234	195605	457943	124114	394605	1.31728e+06	1.06233e+06	306833	0	233786	2.11445e+06	415590	1247.46	2.76107e+06	87142.7	87180.7	0	249560	364800	611050	0	635131	122846	491474	57921	723518	2.05544e+06	0	914870	769.503	769.503
0	PG(16:0/20:4)+NH4	PG(36:4)+NH4	PG	(16:0/20:4)	(16:0)	(20:4)			788.544	C42 H79 O10 N1 P1	444890	0	0	256631	2172.86	0	208634	0	190876	762465	161185	294984	1.13014e+06	752662	706123	0	615495	3.13146e+06	282771	290254	3.2515e+06	1529.65	254381	0	0	245655	801859	0	696754	85876.4	238621	1201.25	797194	2.16221e+06	111384	875009	788.544
0	PG(18:0/20:4)-H	PG(38:4)-H	PG	(18:0/20:4)	(18:0)	(20:4)			797.534	C44 H78 O10 N0 P1	2.24899e+06	1.00996e+06	607959	1.30577e+06	0	607273	1.84301e+06	97874.9	1.56579e+06	1.42341e+06	505937	1.0571e+06	3.9435e+06	2.73479e+06	1.97855e+06	254856	2.01137e+06	8.26667e+06	1.52178e+06	581232	7.49604e+06	2932.06	313346	240130	1.44401e+06	1.07065e+06	2.37322e+06	0	2.07202e+06	1.06028e+06	831436	462170	2.1104e+06	5.42622e+06	173552	1.55884e+06	797.535	797.534	797.534
0	PG(18:0/20:4)+NH4	PG(38:4)+NH4	PG	(18:0/20:4)	(18:0)	(20:4)			816.575	C44 H83 O10 N1 P1	1.441e+06	950172	363818	1.28006e+06	0	519564	1.67181e+06	125610	625634	1.61445e+06	864460	659385	3.44505e+06	2.13826e+06	1.52915e+06	106554	1.48797e+06	6.10084e+06	1.06515e+06	199979	6.51004e+06	0	407383	261404	928888	686003	1.51783e+06	78559.3	1.99356e+06	618063	954981	0	2.12013e+06	5.79163e+06	252584	1.61021e+06	816.575	816.575	816.575
0	PG(22:6/22:6)-H	PG(44:12)-H	PG	(22:6/22:6)	(22:6)	(22:6)			865.503	C50 H74 O10 N0 P1	873.571	1327.21	0	367133	0	300056	2691.77	998.401	75345.5	674422	217.812	494544	668812	146604	53158.9	0	187798	1.52724e+06	63558.5	1654.96	1.15276e+06	0	0	1477.17	1795.43	111248	700232	0	3103.93	2568.53	1366.02	0	261365	98273.1	841.782	609607	865.503	865.503
0	PG(22:6/22:6)+NH4	PG(44:12)+NH4	PG	(22:6/22:6)	(22:6)	(22:6)			884.544	C50 H79 O10 N1 P1	93433.9	75233.8	1784.13	262673	0	73542.5	2809.7	0	67614.2	77424.1	993.853	672375	984251	739.891	2536.04	0	1440.51	1.8896e+06	1825.56	0	1.05703e+06	0	0	42662.9	1035.49	1590.08	304150	0	1179.52	827.636	0	0	206644	1.47102e+06	0	384204	884.544	884.544	884.544
0	PI(31:0)+NH4	PI(31:0)+NH4	PI	(31:0)	(31:0)				814.544	C40 H81 O13 N1 P1	3.35596e+06	1.37529e+06	152936	1.24242e+06	4624.76	1.89871e+06	1.77686e+06	176743	837362	617428	519703	727101	5.21942e+06	1.16471e+06	1.95994e+06	360345	2.34192e+06	8.19811e+06	697652	127528	7.72082e+06	273545	771578	1.16943e+06	1.3743e+06	1.47451e+06	3.3955e+06	0	1.97768e+06	819027	472601	705663	3.36964e+06	1.01229e+07	266718	2.50306e+06	814.544	814.544	814.544
0	PI(18:0/16:0)+NH4	PI(34:0)+NH4	PI	(18:0/16:0)	(18:0)	(16:0)			856.591	C43 H87 O13 N1 P1	1.48509e+06	503625	0	304399	0	0	735380	134735	334686	564984	72479	3733.26	1.97323e+06	1.44371e+06	774491	117954	534425	2.83217e+06	529616	3579.81	3.89475e+06	2825.41	51624.6	297762	1.08228e+06	828946	1.77807e+06	0	1.24151e+06	202399	156574	58904.1	1.02405e+06	4.82266e+06	134900	1.61607e+06	856.591	856.591
0	PI(34:1)+NH4	PI(34:1)+NH4	PI	(34:1)	(34:1)				854.575	C43 H85 O13 N1 P1	2.59909e+06	948195	3821.73	4184.31	3885.33	260758	1.13095e+06	0	339978	1.11367e+06	349321	642135	4.1334e+06	2.79393e+06	6482.83	165653	464750	7.10357e+06	342598	591409	13119.9	600503	440136	94301.2	733069	10129.5	2.53542e+06	0	1.92578e+06	2894.42	824696	143581	2.75714e+06	1.77538e+06	310.438	2.35467e+06	854.575	854.575	854.575
0	PI(18:0/18:1)-H	PI(36:1)-H	PI	(18:0/18:1)	(18:0)	(18:1)			863.566	C45 H84 O13 N0 P1	8.15004e+06	2.93101e+06	888860	3.04139e+06	1.30788e+06	2.87566e+06	4.01498e+06	391379	1.4035e+06	3.15666e+06	1.73581e+06	2.95626e+06	1.05099e+07	9.17532e+06	4.36199e+06	1.59938e+06	5.82884e+06	1.6056e+07	2.33497e+06	2.7269e+06	1.62759e+07	1.8379e+06	1.80289e+06	1.86424e+06	5.24792e+06	4.93426e+06	9.40242e+06	295808	6.01235e+06	2.87954e+06	2.33074e+06	2.2123e+06	6.01712e+06	2.16256e+07	725051	6.06641e+06	863.566	863.566	863.566
0	PI(18:0/18:1)+NH4	PI(36:1)+NH4	PI	(18:0/18:1)	(18:0)	(18:1)			882.607	C45 H89 O13 N1 P1	3.67948e+06	1.90166e+06	121288	1.63832e+06	837545	1.33872e+06	2.65512e+06	208140	787439	1.73683e+06	1.21733e+06	1.88302e+06	7.08678e+06	5.46721e+06	2.84681e+06	978886	3.67493e+06	1.19062e+07	2.14793e+06	7364.44	1.08915e+07	103155	1.16284e+06	898463	2.59141e+06	2.58848e+06	5.65849e+06	0	3.32964e+06	1.97334e+06	1.10056e+06	802608	3.62762e+06	1.31576e+07	285117	3.13206e+06	882.607	882.607	882.607
0	PI(18:0/18:2)-H	PI(36:2)-H	PI	(18:0/18:2)	(18:0)	(18:2)			861.55	C45 H82 O13 N0 P1	0	0	0	0	0	0	49428.3	0	0	57478.7	0	0	75897.1	255254	0	0	179562	1.17265e+06	0	0	944228	0	0	0	35570.4	0	540202	0	0	0	0	0	175669	631223	0	0
0	PI(16:0/20:4)-H	PI(36:4)-H	PI	(16:0/20:4)	(16:0)	(20:4)			857.519	C45 H78 O13 N0 P1	1.97665e+07	9.00264e+06	4.91586e+06	1.38627e+07	3.36598e+06	9.03623e+06	1.69758e+07	3.82274e+06	9.9345e+06	1.56588e+07	7.31164e+06	1.00711e+07	2.95449e+07	1.98243e+07	1.28841e+07	3.98764e+06	1.49333e+07	4.1444e+07	1.1399e+07	6.83275e+06	4.55882e+07	3.18966e+06	5.48987e+06	4.81491e+06	8.86949e+06	1.04209e+07	2.26449e+07	1.75238e+06	1.88592e+07	1.01923e+07	8.53144e+06	5.76862e+06	1.89505e+07	4.53413e+07	4.22278e+06	2.01296e+07	857.519	857.52	857.519
0	PI(16:0/20:4)+NH4	PI(36:4)+NH4	PI	(16:0/20:4)	(16:0)	(20:4)			876.56	C45 H83 O13 N1 P1	1.46776e+07	6.53195e+06	3.53117e+06	1.01236e+07	2.0317e+06	6.43786e+06	1.06032e+07	3.37847e+06	7.03016e+06	1.11494e+07	4.17505e+06	7.31586e+06	2.00748e+07	1.3403e+07	9.44451e+06	3.41199e+06	9.95577e+06	3.00733e+07	8.30356e+06	5.39601e+06	3.35122e+07	2.48908e+06	3.52903e+06	3.31138e+06	6.76232e+06	7.28994e+06	1.78298e+07	1.42087e+06	1.39497e+07	6.96979e+06	5.09113e+06	3.92945e+06	1.19632e+07	3.25642e+07	2.90355e+06	1.2691e+07	876.56	876.56	876.56
0	PI(18:0/20:3)-H	PI(38:3)-H	PI	(18:0/20:3)	(18:0)	(20:3)			887.566	C47 H84 O13 N0 P1	502697	97763.4	0	110470	0	290765	330419	0	165488	1647.61	144839	220605	1.14356e+06	480151	553082	0	956233	1.32437e+06	167198	54688.1	1.37507e+06	139418	146054	270147	604996	624726	970909	0	376066	394653	168341	369256	310389	2.26273e+06	0	638437	887.566	887.566
0	PI(18:0/20:4)-H	PI(38:4)-H	PI	(18:0/20:4)	(18:0)	(20:4)			885.55	C47 H82 O13 N0 P1	1.54075e+08	8.06493e+07	4.01351e+07	1.05964e+08	2.5616e+07	6.48999e+07	1.12018e+08	2.65028e+07	7.02138e+07	1.07647e+08	5.32227e+07	7.0917e+07	1.97189e+08	1.20551e+08	1.07568e+08	3.26347e+07	1.16075e+08	2.9164e+08	8.23493e+07	6.25468e+07	3.25874e+08	2.20711e+07	3.88638e+07	3.50745e+07	7.41394e+07	7.39284e+07	1.85654e+08	1.23289e+07	1.32919e+08	7.70153e+07	6.31397e+07	4.33558e+07	1.22625e+08	3.08334e+08	3.70692e+07	1.31067e+08	885.551	885.551	885.551
0	PI(18:0/20:4)+NH4	PI(38:4)+NH4	PI	(18:0/20:4)	(18:0)	(20:4)			904.591	C47 H87 O13 N1 P1	9.98291e+07	5.13375e+07	2.48436e+07	8.07439e+07	1.58534e+07	4.45495e+07	7.31283e+07	1.89153e+07	4.90858e+07	7.21947e+07	3.49837e+07	4.9542e+07	1.34983e+08	8.73844e+07	6.94054e+07	2.10304e+07	7.95591e+07	2.29367e+08	5.7561e+07	4.30009e+07	2.40889e+08	1.69802e+07	2.88019e+07	2.54868e+07	4.8614e+07	4.67642e+07	1.2453e+08	9.02923e+06	8.86423e+07	5.16326e+07	4.27098e+07	2.94999e+07	8.16965e+07	2.29404e+08	2.44682e+07	8.97279e+07	904.591	904.59	904.591
0	PI(18:0/20:4)+H	PI(38:4)+H	PI	(18:0/20:4)	(18:0)	(20:4)			887.564	C47 H84 O13 N0 P1	2.41484e+06	613619	552038	2.18962e+06	0	605971	1.56906e+06	746777	908493	1.83035e+06	688917	1.524e+06	3.85873e+06	2.03218e+06	1.65299e+06	0	1.46397e+06	4.67586e+06	1.22197e+06	539528	5.3508e+06	2785.26	539153	473290	1.05563e+06	924241	3.04497e+06	120274	2.05892e+06	1.25582e+06	1.015e+06	129073	2.28568e+06	5.70858e+06	213795	2.25813e+06	887.564	887.564	887.564
0	PI(18:1/20:4)-H	PI(38:5)-H	PI	(18:1/20:4)	(18:1)	(20:4)			883.534	C47 H80 O13 N0 P1	1.13791e+07	5.25271e+06	2.7695e+06	7.96914e+06	1.96878e+06	5.10657e+06	9.21908e+06	2.53089e+06	5.33656e+06	8.98457e+06	4.03251e+06	6.31885e+06	1.62651e+07	1.10212e+07	6.27434e+06	2.13053e+06	9.12872e+06	2.34646e+07	6.17364e+06	3.78745e+06	2.91123e+07	2.19399e+06	2.40738e+06	2.26573e+06	5.54492e+06	5.59547e+06	1.34741e+07	426910	9.51563e+06	5.38424e+06	5.6655e+06	3.5813e+06	1.08854e+07	2.73868e+07	2.59152e+06	1.10674e+07	883.534	883.535	883.536
0	PI(18:1/20:4)+NH4	PI(38:5)+NH4	PI	(18:1/20:4)	(18:1)	(20:4)			902.575	C47 H85 O13 N1 P1	8.69682e+06	4.54712e+06	1.57659e+06	6.12518e+06	2.22378e+06	4.06696e+06	6.39841e+06	1.93324e+06	3.3456e+06	6.13282e+06	3.13431e+06	4.87072e+06	1.22009e+07	7.70691e+06	5.44482e+06	1.26117e+06	6.62787e+06	1.80199e+07	4.62445e+06	2.83188e+06	2.20182e+07	1.10092e+06	1.59315e+06	1.15198e+06	3.82897e+06	4.07033e+06	9.14002e+06	354803	6.58854e+06	3.83664e+06	3.95991e+06	2.84401e+06	7.58292e+06	2.16323e+07	2.44679e+06	7.90647e+06	902.574	902.576	902.575
0	PI(16:0/22:6)-H	PI(38:6)-H	PI	(16:0/22:6)	(16:0)	(22:6)			881.519	C47 H78 O13 N0 P1	2.0371e+06	463579	427436	1.31764e+06	77350.6	750942	1.65335e+06	0	1.34447e+06	1.66099e+06	481760	995495	3.78686e+06	2.23285e+06	964730	221916	1.19417e+06	3.7011e+06	1.26227e+06	697863	4.74024e+06	145237	637408	295558	765682	762043	2.3127e+06	0	1.57562e+06	906963	661148	316780	1.80845e+06	4.89305e+06	340039	2.22458e+06	881.519	881.519	881.519
0	PI(16:0/22:6)+NH4	PI(38:6)+NH4	PI	(16:0/22:6)	(16:0)	(22:6)			900.56	C47 H83 O13 N1 P1	1.32074e+06	456312	173446	910140	277069	470585	1.05355e+06	0	897625	1.55083e+06	546469	705503	3.03191e+06	1.63151e+06	1.00399e+06	0	897016	3.72014e+06	644465	817312	3.37203e+06	0	202525	272137	605156	701956	1.92419e+06	0	1.58952e+06	873470	547582	288636	1.37618e+06	4.03768e+06	254992	1.80504e+06	900.56	900.56	900.56
0	PI(18:0/22:4)-H	PI(40:4)-H	PI	(18:0/22:4)	(18:0)	(22:4)			913.581	C49 H86 O13 N0 P1	878102	265270	120321	1.02494e+06	0	152130	396028	0	318621	340650	164872	392246	1.33971e+06	779815	746525	82279.2	408665	748263	247987	648847	1.23254e+06	0	0	115589	567172	509.015	1.25953e+06	1756.48	893024	300762	309141	98281.4	1.08141e+06	1.8393e+06	166827	614219	913.581	913.581	913.581
0	PI(18:0/22:6)-H	PI(40:6)-H	PI	(18:0/22:6)	(18:0)	(22:6)			909.55	C49 H82 O13 N0 P1	3.35718e+06	2.1773e+06	1.00354e+06	2.2787e+06	231337	2.08153e+06	2757151	216691	1.92017e+06	2.45034e+06	928278	1.56229e+06	5.81286e+06	3.83947e+06	2.29256e+06	563074	2.79476e+06	6.17295e+06	2.28862e+06	1.31578e+06	7.93466e+06	218120	1.04189e+06	977824	1.78382e+06	1.45967e+06	3.94001e+06	46281.3	4.05631e+06	1.1648e+06	1.50664e+06	436879	3.06726e+06	6.80816e+06	354947	3.19312e+06	909.551	909.55	909.55
0	PIP2(35:1p)-H	PIP2(35:1p)-H	PIP2	(35:1p)	(35:1p)				993.488	C44 H84 O18 N0 P3	445225	116409	0	331763	0	150796	227877	109949	231036	154331	173528	166139	653976	275162	414864	0	468405	182235	297907	0	1.63938e+06	0	0	0	190566	206285	578384	0	369104	378960	95135.5	0	420850	1.07103e+06	0	276901	993.488	993.488
0	PIP2(37:1p)-H	PIP2(37:1p)-H	PIP2	(37:1p)	(37:1p)				1021.52	C46 H88 O18 N0 P3	3.45844e+06	2.6452e+06	1.1352e+06	3.32836e+06	446146	2.07875e+06	2.51317e+06	1.04029e+06	2.40989e+06	2.7362e+06	973396	2.98232e+06	3.98615e+06	2.51266e+06	2.97852e+06	855176	3.52346e+06	2.22326e+06	1.93387e+06	1.25382e+06	3.13548e+06	602086	628906	994251	2.38941e+06	1.69504e+06	4.23074e+06	374140	3.0823e+06	3.19531e+06	1.82584e+06	1.55151e+06	2.97629e+06	3.38687e+06	842729	3.48349e+06	1021.53	1021.53	1021.52
0	PS(16:0/18:1)-H	PS(34:1)-H	PS	(16:0/18:1)	(16:0)	(18:1)			760.513	C40 H75 O10 N1 P1	1.19416e+07	6.9858e+06	1.02991e+06	6.36493e+06	1.48024e+06	4.78875e+06	5.80907e+06	965989	7.99996e+06	1.41667e+07	2.00569e+06	2.92415e+06	1.33605e+07	8.12857e+06	6.10823e+06	1.14505e+06	5.48399e+06	1.86076e+07	5.20318e+06	2.49803e+06	2.08756e+07	993455	1.8183e+06	1.72123e+06	4.73187e+06	4.05552e+06	1.16551e+07	258098	7.74774e+06	3.93675e+06	3.25809e+06	2.28967e+06	7.46573e+06	2.09356e+07	1.12447e+06	7.97916e+06	760.514	760.515	760.514
0	PS(18:0/18:1)-H	PS(36:1)-H	PS	(18:0/18:1)	(18:0)	(18:1)			788.545	C42 H79 O10 N1 P1	2.20974e+08	1.09433e+08	2.16773e+07	8.4881e+07	3.16778e+07	1.19676e+08	7.15449e+07	1.44927e+07	4.67641e+07	7.64125e+07	4.27462e+07	6.41237e+07	2.68557e+08	1.80822e+08	1.11638e+08	4.1116e+07	1.21197e+08	3.71064e+08	7.53772e+07	4.81744e+07	4.26886e+08	5.00546e+07	4.5303e+07	5.64162e+07	1.32437e+08	1.51831e+08	2.22106e+08	2.46371e+07	1.38023e+08	9.44653e+07	4.86101e+07	4.45886e+07	1.54825e+08	5.48936e+08	1.67333e+07	1.43163e+08	788.546	788.547	788.545
0	PS(18:0/18:1)+H	PS(36:1)+H	PS	(18:0/18:1)	(18:0)	(18:1)			790.559	C42 H81 O10 N1 P1	2.01245e+08	1.24237e+08	1.71457e+07	8.02528e+07	2.57472e+07	1.02745e+08	7.02927e+07	1.38468e+07	4.51689e+07	7.01464e+07	4.15956e+07	6.3514e+07	2.54234e+08	1.81545e+08	1.16758e+08	5.03854e+07	1.17723e+08	4.45427e+08	6.93495e+07	5.29909e+07	4.51761e+08	4.66307e+07	5.01419e+07	5.68591e+07	1.35686e+08	1.41147e+08	2.31282e+08	2.43008e+07	1.42796e+08	8.84034e+07	5.4466e+07	4.84372e+07	1.48698e+08	5.94626e+08	1.70733e+07	1.5413e+08	790.56	790.559	790.559
0	PS(36:1p)-H	PS(36:1p)-H	PS	(36:1p)	(36:1p)				772.55	C42 H79 O9 N1 P1	108261	438543	79824.8	0	0	90301.8	0	0	0	192442	0	0	4092.14	0	0	0	0	438090	0	64683.4	131330	50837.6	0	0	51503.2	329926	670382	0	762.429	0	80126.3	0	252976	2.53097e+06	0	349025	772.55	772.55	772.55
0	PS(18:1/18:1)-H	PS(36:2)-H	PS	(18:1/18:1)	(18:1)	(18:1)			786.529	C42 H77 O10 N1 P1	2.89269e+07	1.38951e+07	5.06655e+06	1.94485e+07	4.07949e+06	1.27758e+07	1.85188e+07	4.29004e+06	1.29011e+07	2.29277e+07	8.21517e+06	1.31715e+07	3.76317e+07	2.2569e+07	1.84328e+07	5.71874e+06	1.92973e+07	5.13552e+07	1.5862e+07	8.43526e+06	6.14863e+07	5.16003e+06	6.76756e+06	6.92335e+06	1.43446e+07	1.38676e+07	3.24317e+07	1.50961e+06	1.93682e+07	1.28905e+07	9.04054e+06	8.7648e+06	2.36388e+07	6.79294e+07	4.54459e+06	2.5869e+07	786.53	786.53	786.53
0	PS(18:1/18:1)+H	PS(36:2)+H	PS	(18:1/18:1)	(18:1)	(18:1)			788.544	C42 H79 O10 N1 P1	2.62867e+07	1.64023e+07	4.82573e+06	2.15097e+07	3.4106e+06	1.49051e+07	2.01989e+07	4.68602e+06	1.09767e+07	2.43364e+07	8.43236e+06	1.19137e+07	4.88297e+07	3.35196e+07	1.8052e+07	6.18185e+06	1.87426e+07	6.44435e+07	1.60341e+07	1.14126e+07	6.62403e+07	5.06122e+06	8.41462e+06	6.80088e+06	1.44867e+07	1.38859e+07	2.91495e+07	1.74989e+06	2.44981e+07	1.45665e+07	9.55415e+06	7.16122e+06	2.86441e+07	8.61222e+06	5.01755e+06	2.35833e+07	788.542	788.544	788.543
0	PS(36:3)-H	PS(36:3)-H	PS	(36:3)	(36:3)				784.513	C42 H75 O10 N1 P1	3.10649e+06	2.80569e+06	1.06668e+06	3.21364e+06	1.12458e+06	1.59304e+06	2.54578e+06	378197	1.54208e+06	2.71733e+06	1.21324e+06	2.29991e+06	4.5024e+06	4.61321e+06	2.36988e+06	896825	2.66163e+06	5.51984e+06	1.87565e+06	1.74235e+06	4.95174e+06	1.06314e+06	1.21189e+06	946557	3.20494e+06	2.2134e+06	4.13441e+06	442585	3.16295e+06	2.13748e+06	1.63757e+06	664644	3.17913e+06	4.9247e+06	155698	3.4132e+06	784.513	784.512	784.513
0	PS(36:3p)-H	PS(36:3p)-H	PS	(36:3p)	(36:3p)				768.518	C42 H75 O9 N1 P1	9.6032e+06	5.49906e+06	1.10914e+06	3.81974e+06	1.2686e+06	5.35967e+06	4.96527e+06	1.16227e+06	2.40691e+06	5.05675e+06	2.00965e+06	4.76094e+06	9.05868e+06	9.05827e+06	5.10141e+06	2.40008e+06	5.60981e+06	1.7166e+07	2.92634e+06	3.06373e+06	1.5017e+07	3.04277e+06	2.21736e+06	2.51632e+06	7.27123e+06	7.10733e+06	9.66218e+06	775679	6.32053e+06	6.48074e+06	2.81761e+06	1.87178e+06	7.19495e+06	1.54648e+07	720947	6.19373e+06	768.516	768.517	768.517
0	PS(16:0/20:4)+H	PS(36:4)+H	PS	(16:0/20:4)	(16:0)	(20:4)			784.512	C42 H75 O10 N1 P1	143361	0	0	265703	0	174794	198030	0	216424	483020	2550.32	0	287078	366418	0	0	125095	465789	124256	0	1.17791e+06	0	0	0	203534	0	0	0	93470.9	0	98216	0	305207	2.10327e+06	0	291534	784.512
0	PS(18:0/20:1)-H	PS(38:1)-H	PS	(18:0/20:1)	(18:0)	(20:1)			816.576	C44 H83 O10 N1 P1	1.62621e+07	1.00284e+07	1.25888e+06	8.21338e+06	1.85772e+06	1.0297e+07	3.94969e+06	189667	2.47592e+06	4.6189e+06	3.08489e+06	5.06583e+06	1.76757e+07	1.57766e+07	9.51957e+06	5.27971e+06	9.68477e+06	3.13681e+07	6.09819e+06	4.00585e+06	3.73301e+07	4.27027e+06	811343	5.50202e+06	1.24813e+07	1.22104e+07	2.19221e+07	1.27281e+06	1.13702e+07	6.39886e+06	5.41286e+06	5.01887e+06	1.27841e+07	6.15484e+07	1.32271e+06	1.36987e+07	816.576	816.578	816.576
0	PS(18:0/20:1)+H	PS(38:1)+H	PS	(18:0/20:1)	(18:0)	(20:1)			818.591	C44 H85 O10 N1 P1	1.52239e+07	9.91261e+06	587661	5.40944e+06	2.13084e+06	1.00442e+07	6.23415e+06	796507	1.90666e+06	5.00068e+06	3.47855e+06	5.6438e+06	1.86083e+07	1.94092e+07	8.00004e+06	4.70202e+06	8.29418e+06	3.06944e+07	4.61245e+06	1.78943e+06	3.25667e+07	4.67079e+06	2.39404e+06	5.63183e+06	1.17329e+07	1.28615e+07	2.03039e+07	1.06862e+06	9.28417e+06	3.52428e+06	3.98032e+06	3.3645e+06	1.3905e+07	5.15006e+07	1.02379e+06	1.44508e+07	818.59	818.59	818.591
0	PS(20:1/18:1)-H	PS(38:2)-H	PS	(20:1/18:1)	(20:1)	(18:1)			814.56	C44 H81 O10 N1 P1	3.64658e+06	1.52499e+06	87477.3	1.57504e+06	133513	1.15968e+06	1.5499e+06	77449.4	626641	1.11499e+06	581236	1.26842e+06	4.26488e+06	3.77963e+06	2.25027e+06	693563	2.1977e+06	7.7621e+06	1.27373e+06	532056	7.86075e+06	895059	638589	768456	2.98758e+06	2.9427e+06	3.97245e+06	125523	2.40768e+06	1.40984e+06	518807	329674	2.38937e+06	1.03572e+07	162063	2.02704e+06	814.562	814.561	814.56
0	PS(20:1/18:1)+H	PS(38:2)+H	PS	(20:1/18:1)	(20:1)	(18:1)			816.575	C44 H83 O10 N1 P1	3.01315e+06	2.17982e+06	0	1.54045e+06	247179	3.37932e+06	1.01597e+06	0	418462	485240	324898	1.25694e+06	5.76246e+06	3.81668e+06	1.84791e+06	2435.47	2.15442e+06	7.81256e+06	653537	4175.15	8.54054e+06	3474.74	367339	1.1149e+06	2.36585e+06	3255324	5.03428e+06	87641.2	2.95817e+06	1.24961e+06	510683	454779	3.13681e+06	1.47818e+07	0	1.19871e+06	816.575	816.575
0	PS(18:0/20:3)-H	PS(38:3)-H	PS	(18:0/20:3)	(18:0)	(20:3)			812.545	C44 H79 O10 N1 P1	6.89684e+06	2.45169e+06	644745	2.01688e+06	115670	3.52656e+06	1.62012e+06	185223	888019	975443	1.09338e+06	683833	4.67959e+06	4.20194e+06	2.05797e+06	831464	2.82065e+06	5.04302e+06	1.58847e+06	1.07794e+06	7.57965e+06	1.38479e+06	770659	695048	3.23924e+06	1.60682e+06	4.23412e+06	265441	4.44151e+06	1.65897e+06	1.03651e+06	1.15593e+06	3.82963e+06	9.87966e+06	165908	3.56253e+06	812.546	812.544	812.545
0	PS(38:3)-H	PS(38:3)-H	PS	(38:3)	(38:3)				812.545	C44 H79 O10 N1 P1	8.81254e+06	4.58801e+06	1.92688e+06	4.54919e+06	1.66485e+06	4.87105e+06	7.02374e+06	945923	3.47069e+06	5.18918e+06	3.39968e+06	5.02753e+06	1.11834e+07	1.0561e+07	6.04605e+06	2.60828e+06	6.43719e+06	2.10713e+07	3.54215e+06	3.35892e+06	1.70259e+07	3.65255e+06	2.32984e+06	2.64932e+06	7.5313e+06	7.38363e+06	9.98509e+06	957002	7.69962e+06	5.55639e+06	4.71415e+06	1.83992e+06	6.97734e+06	1.79713e+07	1.38086e+06	7.18634e+06	812.543	812.542	812.544
0	PS(38:3p)-H	PS(38:3p)-H	PS	(38:3p)	(38:3p)				796.55	C44 H79 O9 N1 P1	1.73275e+07	2.64943e+06	2.56326e+06	7.15022e+06	2.41362e+06	9.2782e+06	8.2582e+06	2.22453e+06	3.30156e+06	6.70314e+06	3.79888e+06	7.91257e+06	2.15164e+06	1.76902e+07	8.05208e+06	3.79165e+06	3.30563e+06	3.54413e+07	4.51421e+06	4.81935e+06	3.05381e+07	6.37184e+06	3.97864e+06	3.98649e+06	1.27038e+07	1.56534e+07	1.50206e+07	1.4458e+06	1.25633e+07	8.82286e+06	5.9473e+06	3.39989e+06	1.54244e+07	3.455e+07	1.48184e+06	1.39079e+07	796.549	796.55	796.55
0	PS(18:0/20:4)+H	PS(38:4)+H	PS	(18:0/20:4)	(18:0)	(20:4)			812.544	C44 H79 O10 N1 P1	3.11991e+07	1.50139e+07	3.95548e+06	1.4148e+07	3.63816e+06	1.34681e+07	1.35032e+07	1.75139e+06	1.07083e+07	1.50573e+07	7.9476e+06	9.72545e+06	4.02775e+07	2.6748e+07	1.96659e+07	6.15112e+06	1.91868e+07	7.48881e+07	1.32234e+07	9.08103e+06	6.27258e+07	6.35427e+06	7.86747e+06	8.66536e+06	1.9199e+07	1.85675e+07	3.43283e+07	1.86742e+06	1.97327e+07	1.38633e+07	9.37379e+06	7.27139e+06	2.45073e+07	8.07089e+07	2.81906e+06	2.38317e+07	812.544	812.544	812.544
0	PS(18:0/20:4)-H	PS(38:4)-H	PS	(18:0/20:4)	(18:0)	(20:4)			810.529	C44 H77 O10 N1 P1	3.32042e+07	1.34958e+07	3.75335e+06	1.51853e+07	3.77551e+06	1.70114e+07	1.55463e+07	2.16326e+06	8.66698e+06	1.57637e+07	6.79386e+06	9.551e+06	3.99106e+07	2.81142e+07	1.91867e+07	6.16102e+06	1.90623e+07	5.71517e+07	1.42225e+07	9.01886e+06	7.03401e+07	5.13657e+06	6.9511e+06	7.27467e+06	1.85838e+07	1.76941e+07	3.70123e+07	2.78625e+06	2.25803e+07	1.1941e+07	8.99934e+06	6.48714e+06	2.39234e+07	7.69857e+07	3.02523e+06	2.42009e+07	810.53	810.53	810.529
0	PS(18:1/20:3)-H	PS(38:4)-H	PS	(18:1/20:3)	(18:1)	(20:3)			810.529	C44 H77 O10 N1 P1	3.73632e+06	2.65455e+06	1.12563e+06	3.56838e+06	533991	1.89309e+06	2.6883e+06	701990	812618	3.35114e+06	918723	2.52708e+06	4.15956e+06	3.76864e+06	1.84913e+06	950872	4.08121e+06	8.09555e+06	1.75488e+06	1.64465e+06	4.73253e+06	1.51955e+06	713075	800290	2.30401e+06	2.47137e+06	2.96874e+06	455984	2.77167e+06	2.12104e+06	1.78661e+06	672387	1.92228e+06	4.47078e+06	356742	3.0108e+06	810.529	810.528	810.529
0	PS(18:1/20:4)-H	PS(38:5)-H	PS	(18:1/20:4)	(18:1)	(20:4)			808.513	C44 H75 O10 N1 P1	1.93328e+06	557693	106009	833276	57246	603784	796135	0	794424	1.48436e+06	160130	445255	2.48485e+06	1.93481e+06	414738	0	1.02783e+06	3.82234e+06	1.39992e+06	183507	3.91885e+06	0	61500.6	0	461085	957013	1.14541e+06	0	874998	530518	556621	370073	1.23936e+06	4.70811e+06	0	986247	808.515	808.513	808.513
0	PS(18:1/20:4)+H	PS(38:5)+H	PS	(18:1/20:4)	(18:1)	(20:4)			810.528	C44 H77 O10 N1 P1	1.85877e+06	581581	115471	504669	0	741528	794036	0	128587	1.18282e+06	143953	496164	2.76112e+06	1.41649e+06	732260	0	135444	4.21263e+06	976861	483218	3.91619e+06	173142	26275.4	0	280578	574086	1.5202e+06	0	985673	315527	324233	307644	1.15174e+06	4.23876e+06	0	2.29384e+06	810.528	810.528	810.528
0	PS(16:0/22:6)+H	PS(38:6)+H	PS	(16:0/22:6)	(16:0)	(22:6)			808.512	C44 H75 O10 N1 P1	1.80959e+06	894815	0	1.23193e+06	0	553001	1.21039e+06	90577.7	1.4155e+06	2.56304e+06	366897	543008	2.30091e+06	1.40734e+06	1.17158e+06	83917.3	843149	3.51125e+06	955347	333081	3.99577e+06	189608	115998	140988	964822	590478	1.59685e+06	0	1.33148e+06	399386	358230	471681	1.53827e+06	4.16388e+06	292907	1.55024e+06	808.511	808.512
0	PS(16:0/22:6)-H	PS(38:6)-H	PS	(16:0/22:6)	(16:0)	(22:6)			806.498	C44 H73 O10 N1 P1	1.4239e+06	643713	0	862279	0	358161	789906	0	1.09487e+06	1.91438e+06	238429	296949	1.938e+06	1.54574e+06	595273	66838.5	820292	3.12104e+06	780901	428029	3.89196e+06	0	78970	66200.4	744724	91514.9	1.14112e+06	0	1.05723e+06	413871	461037	157863	1.14547e+06	3.72391e+06	126415	1.062e+06	806.499	806.498
0	PS(18:2/20:4)-H	PS(38:6)-H	PS	(18:2/20:4)	(18:2)	(20:4)			806.498	C44 H73 O10 N1 P1	2.65951e+06	1.63314e+06	647879	2.09428e+06	160839	1.44138e+06	2.90177e+06	185580	1.33875e+06	2.00883e+06	1.29012e+06	1.0606e+06	1.96515e+06	2.45711e+06	1.64104e+06	923888	1.99338e+06	5.134e+06	1.07601e+06	1.07426e+06	3.90119e+06	873455	709081	526845	1.72117e+06	1.87235e+06	2.14171e+06	109636	2.52985e+06	1.55324e+06	1.618e+06	813488	2.09872e+06	3.88556e+06	289255	2.29913e+06	806.496	806.497	806.498
0	PS(38:6p)-H	PS(38:6p)-H	PS	(38:6p)	(38:6p)				790.503	C44 H73 O9 N1 P1	48812.9	0	0	2304.36	0	0	2828.4	0	0	0	0	580.484	370226	0	44866.8	0	114385	2230.55	2594.82	0	661971	0	0	2067.3	0	0	148377	0	10454.8	0	0	34059.4	0	182611	0	0	790.503
0	PS(38:6p)-H	PS(38:6p)-H	PS	(38:6p)	(38:6p)				790.503	C44 H73 O9 N1 P1	3.64254e+06	2.3144e+06	1.26119e+06	3.04333e+06	421485	1.88777e+06	4.92998e+06	968996	2.37886e+06	3.93913e+06	1.87175e+06	3.87586e+06	5.74353e+06	4.32602e+06	3.78146e+06	1.10667e+06	5.33357e+06	1.00101e+07	2.93744e+06	2.31193e+06	9.07995e+06	768703	1.80852e+06	1.62352e+06	2.64012e+06	2.20208e+06	4.11433e+06	290357	4.11742e+06	1.89586e+06	2.13146e+06	1.24736e+06	3.30487e+06	6.11109e+06	700459	3.32673e+06	790.502	790.503	790.503
0	PS(18:1/21:0)+H	PS(39:1)+H	PS	(18:1/21:0)	(18:1)	(21:0)			832.606	C45 H87 O10 N1 P1	1.04511e+06	112110	0	3129.42	0	141055	0	0	0	0	0	51084.7	549246	374211	231183	0	408595	948419	162470	0	2.28837e+06	0	3809.47	63815.4	343577	245009	732397	0	704105	184014	0	83620.1	269738	4.67191e+06	0	396755	832.606	832.606
0	PS(18:1/21:0)-H	PS(39:1)-H	PS	(18:1/21:0)	(18:1)	(21:0)			830.592	C45 H85 O10 N1 P1	984654	89457.2	0	251067	0	379322	218470	0	0	0	105151	79299.9	923605	429109	144122	77528.7	3086.03	2.89196e+06	195124	48278.9	885395	328102	1861.15	64457.3	619617	674193	1.17903e+06	0	206675	278330	0	110986	548848	4.14919e+06	0	320900	830.592	830.592
0	PS(18:1/22:0)-H	PS(40:1)-H	PS	(18:1/22:0)	(18:1)	(22:0)			844.607	C46 H87 O10 N1 P1	3.02506e+06	2.46021e+06	0	1.93505e+06	489585	3.09734e+06	1.24819e+06	1811.28	530819	1.06622e+06	680290	1.51142e+06	8.28289e+06	5.26947e+06	2.98984e+06	694776	2.46324e+06	1.00191e+07	2.03262e+06	1.67713e+06	1.23292e+07	731346	471820	1.45069e+06	4.07368e+06	4.90161e+06	6.0441e+06	208794	3.08265e+06	2.2662e+06	1.29407e+06	1.32167e+06	4.51979e+06	1.9591e+07	3647.44	4.16803e+06	844.607	844.607
0	PS(18:1/22:0)+H	PS(40:1)+H	PS	(18:1/22:0)	(18:1)	(22:0)			846.622	C46 H89 O10 N1 P1	3.89642e+06	2.20649e+06	128677	1.54854e+06	903374	2.68728e+06	1.29523e+06	0	655681	699541	655270	815619	5.80732e+06	5.31717e+06	2.76003e+06	942872	2.52132e+06	1.17393e+07	1.67988e+06	436687	8.45505e+06	673759	596857	900725	4.28282e+06	3.59618e+06	6.30468e+06	290444	3.63897e+06	1.70882e+06	909715	804689	3.41058e+06	1.48279e+07	115906	4.15728e+06	846.62	846.622	846.622
0	PS(18:1/22:1)-H	PS(40:2)-H	PS	(18:1/22:1)	(18:1)	(22:1)			842.592	C46 H85 O10 N1 P1	3.35541e+06	2.74969e+06	186757	2.3609e+06	250528	1.86528e+06	1.33506e+06	0	282545	1.32776e+06	631886	1.62014e+06	7.33406e+06	5.57813e+06	3.36112e+06	889817	2.21522e+06	1.17439e+07	1.6608e+06	82023.8	1.12126e+07	953454	1.54973e+06	1.57725e+06	2.18537e+06	3.6972e+06	5.34915e+06	594261	3.12656e+06	2.2154e+06	962762	572534	2.75637e+06	1.53768e+07	70217.4	2.6895e+06	842.592	842.592	842.592
0	PS(18:1/22:1)+H	PS(40:2)+H	PS	(18:1/22:1)	(18:1)	(22:1)			844.606	C46 H87 O10 N1 P1	4.25001e+06	1.70856e+06	0	1.07442e+06	543251	2.66746e+06	1.99174e+06	0	537049	1.57952e+06	747828	1.26079e+06	6.73707e+06	4.99362e+06	3.35735e+06	540307	2.70362e+06	1.16389e+07	1.81572e+06	1.00582e+06	1.13663e+07	1.45853e+06	1.20803e+06	679152	3.25836e+06	4.05256e+06	5.25986e+06	215032	3.14286e+06	1.72121e+06	774643	355699	2.86488e+06	1.45794e+07	0	2.40832e+06	844.606	844.606
0	PS(18:0/22:4)-H	PS(40:4)-H	PS	(18:0/22:4)	(18:0)	(22:4)			838.56	C46 H81 O10 N1 P1	2.75685e+07	1.33775e+07	4.45796e+06	1.79473e+07	4.69473e+06	1.64374e+07	1.86263e+07	1.56684e+06	1.07811e+07	1.37849e+07	8.06299e+06	8.79381e+06	3.37845e+07	2.24841e+07	2.03238e+07	5.78544e+06	1.75493e+07	5.62228e+07	1.69446e+07	9.07479e+06	6.40668e+07	3.79107e+06	7.33733e+06	6.82866e+06	1.81638e+07	1.67308e+07	3.51725e+07	2.3556e+06	2.41958e+07	9.5099e+06	8.63268e+06	9.22164e+06	2.65055e+07	7.69997e+07	4.22597e+06	2.465e+07	838.561	838.561	838.561
0	PS(18:0/22:4)+H	PS(40:4)+H	PS	(18:0/22:4)	(18:0)	(22:4)			840.575	C46 H83 O10 N1 P1	3.52716e+07	1.66855e+07	5.36173e+06	2.01141e+07	4.74787e+06	1.74721e+07	1.98417e+07	2.41852e+06	1.24252e+07	1.77847e+07	8.91035e+06	1.08622e+07	4.74885e+07	2.69138e+07	2.56527e+07	6.04462e+06	2.16818e+07	8.75418e+07	1.93144e+07	1.09456e+07	9.08547e+07	4.54905e+06	9.11625e+06	8.10727e+06	2.27573e+07	1.82411e+07	4.94065e+07	2.59722e+06	2.69118e+07	1.27293e+07	1.27748e+07	1.01191e+07	3.16232e+07	1.10149e+08	4.64219e+06	2.8757e+07	840.574	840.575	840.575
0	PS(40:4)-H	PS(40:4)-H	PS	(40:4)	(40:4)				838.56	C46 H81 O10 N1 P1	180089	100029	0	0	0	98315.7	240224	0	0	0	0	2616.79	381507	236663	156986	82037.4	194286	453371	91371.6	0	602880	4781.47	0	207351	127170	329374	261246	0	0	99516.1	0	43487.6	160820	1.08739e+06	0	0	838.56	838.56
0	PS(18:0/22:5)-H	PS(40:5)-H	PS	(18:0/22:5)	(18:0)	(22:5)			836.545	C46 H79 O10 N1 P1	2.71304e+06	942083	0	1.23525e+06	317619	1.05989e+06	2.58341e+06	3400.39	1.46363e+06	2.40081e+06	219109	751351	3.26018e+06	1.4639e+06	1.69244e+06	441795	2.43863e+06	262242	863234	822923	8.04815e+06	4326.33	957628	508568	1.36769e+06	893519	4.43338e+06	0	2.32374e+06	779908	380243	946439	1.25137e+06	6.56682e+06	570290	3.94283e+06	836.545	836.545
0	PS(18:0/22:6)+H	PS(40:6)+H	PS	(18:0/22:6)	(18:0)	(22:6)			836.544	C46 H79 O10 N1 P1	5.2751e+08	2.58972e+08	1.05857e+08	3.80238e+08	7.39214e+07	2.61155e+08	3.46858e+08	6.29713e+07	2.7816e+08	4.2074e+08	1.49201e+08	2.35071e+08	7.65682e+08	4.39972e+08	4.13028e+08	1.20263e+08	3.79265e+08	1.14221e+09	3.25491e+08	2.11923e+08	1.37779e+09	6.52669e+07	1.64144e+08	1.44161e+08	3.12484e+08	2.29408e+08	7.23572e+08	3.63523e+07	4.60121e+08	2.53155e+08	2.37294e+08	1.75759e+08	4.77604e+08	1.2407e+09	1.19497e+08	5.69373e+08	836.543	836.543	836.544
0	PS(18:0/22:6)-H	PS(40:6)-H	PS	(18:0/22:6)	(18:0)	(22:6)			834.529	C46 H77 O10 N1 P1	4.10487e+08	1.93505e+08	7.88983e+07	2.87817e+08	97259.8	2.07714e+08	3.1266e+08	4.58952e+07	2.34041e+08	3.16248e+08	1.25714e+08	1.58337e+08	5.9105e+08	3.01857e+08	3.57885e+08	8.33636e+07	2.90983e+08	7.01883e+08	2.43547e+08	1.65508e+08	1.02755e+09	72820	1.35759e+08	1.05139e+08	2.3036e+08	1.90098e+08	5.09631e+08	2.7731e+07	3.70469e+08	1.84911e+08	1.57558e+08	1.31244e+08	3.46682e+08	9.48904e+08	9.5355e+07	3.98139e+08	834.531	834.53	834.531
0	PS(40:6)-H	PS(40:6)-H	PS	(40:6)	(40:6)				834.529	C46 H77 O10 N1 P1	2.13126e+07	1.19493e+07	8.03536e+06	1.6602e+07	5.94461e+06	1.19916e+07	2.11714e+07	5.09255e+06	1.07483e+07	1.63147e+07	8.75096e+06	1.299e+07	2.18989e+07	1.73717e+07	1.64089e+07	6.46397e+06	1.7863e+07	3.06213e+07	1.33194e+07	1.09391e+07	2.57025e+07	5.45998e+06	7.21427e+06	6.69126e+06	1.62506e+07	1.37485e+07	2.44075e+07	3.66817e+06	2.13638e+07	1.30261e+07	1.16741e+07	7.45463e+06	2.06742e+07	3.09844e+07	5.37876e+06	1.8065e+07	834.528	834.528	834.528
0	PS(18:0p/22:6)-H	PS(40:6p)-H	PS	(18:0p/22:6)	(18:0p)	(22:6)			818.534	C46 H77 O9 N1 P1	405138	209084	153226	319966	372830	0	0	962.138	160517	605016	131451	487515	709623	535235	0	0	379458	2.48402e+06	739066	841254	1.66277e+06	66946.7	1773.9	0	562152	419574	1.01907e+06	0	846694	425554	834475	0	557501	2.28365e+06	5123.98	679500	818.534	818.534	818.534
0	PS(40:6p)-H	PS(40:6p)-H	PS	(40:6p)	(40:6p)				818.534	C46 H77 O9 N1 P1	2.48763e+06	1.50686e+06	835612	2.79462e+06	724884	2.25901e+06	3.17307e+06	498765	1.65825e+06	1.45744e+06	1.16453e+06	999353	2.91264e+06	2.42907e+06	2.34662e+06	386706	2.54395e+06	4.6501e+06	1.27394e+06	1.38582e+06	5.56031e+06	679495	937087	373144	2.34968e+06	2.04996e+06	3.19142e+06	307274	3.12127e+06	1.92529e+06	1.02685e+06	722300	2.76228e+06	4.42157e+06	2816.49	2.92347e+06	818.533	818.533	818.534
0	PS(18:1/22:6)+H	PS(40:7)+H	PS	(18:1/22:6)	(18:1)	(22:6)			834.528	C46 H77 O10 N1 P1	5.79157e+06	4.10556e+06	747049	4.64731e+06	539738	2.61381e+06	4.66814e+06	535637	3.33571e+06	6.17548e+06	1.50061e+06	2.65078e+06	7.4046e+06	5.18142e+06	4.02655e+06	823955	3.56826e+06	1.19956e+07	3.9891e+06	1.82769e+06	1.39532e+07	265234	1.32736e+06	949318	2.17175e+06	1.73661e+06	5.37605e+06	83161.7	4.9728e+06	2.15032e+06	1.87446e+06	1.56931e+06	4.26198e+06	1.37449e+07	1.12372e+06	6.07411e+06	834.528	834.527	834.528
0	PS(18:1/22:6)-H	PS(40:7)-H	PS	(18:1/22:6)	(18:1)	(22:6)			832.513	C46 H75 O10 N1 P1	4.5636e+06	2.29347e+06	557239	3.35973e+06	315142	2.00494e+06	3.72269e+06	359487	2.59381e+06	3.90652e+06	1.41341e+06	2.13543e+06	7.47543e+06	4.396e+06	3.17417e+06	1.00996e+06	3.1373e+06	1.10032e+07	2.15528e+06	1.25222e+06	1.22947e+07	73439.6	1.39436e+06	898224	2.16283e+06	1.73418e+06	4.69726e+06	0	3.3638e+06	2.55521e+06	1.76776e+06	1.1231e+06	4.46369e+06	1.16667e+07	703839	4.38895e+06	832.514	832.515	832.513
0	PS(40:7)-H	PS(40:7)-H	PS	(40:7)	(40:7)				832.513	C46 H75 O10 N1 P1	2.96206e+06	2.61791e+06	349744	1.90388e+06	521340	1.51061e+06	2.18547e+06	612071	1.06654e+06	2.40207e+06	689730	1.64033e+06	3.28842e+06	3.82056e+06	1.049e+06	366690	2.62419e+06	6.37935e+06	1.62161e+06	553987	4.97825e+06	1.10012e+06	557110	989837	1.74899e+06	2.21969e+06	2.78993e+06	269172	2.44066e+06	1.65881e+06	1.22167e+06	600171	2.50387e+06	5.76398e+06	190880	2.092e+06	832.512	832.512	832.513
0	PS(40:7)+H	PS(40:7)+H	PS	(40:7)	(40:7)				834.528	C46 H77 O10 N1 P1	7.15323e+06	4.9472e+06	1.10587e+06	3.46969e+06	2.31524e+06	5.28094e+06	2.96827e+06	427940	2.18187e+06	2.86234e+06	2.79441e+06	2.75193e+06	6.56791e+06	7.15671e+06	4.54333e+06	3.25392e+06	4.53993e+06	2.7321e+06	3.4453e+06	3.19662e+06	5.9865e+06	3.65217e+06	3.02385e+06	3.53694e+06	5.84135e+06	5.279e+06	9.82419e+06	1.37702e+06	4.62208e+06	5.91978e+06	2.99051e+06	3.3557e+06	5.39022e+06	4.30057e+06	681523	4.96924e+06	834.528	834.528	834.528
0	PS(40:7p)-H	PS(40:7p)-H	PS	(40:7p)	(40:7p)				816.518	C46 H75 O9 N1 P1	8.94328e+06	4.21442e+06	1.29375e+06	5.54419e+06	1.24999e+06	3.72395e+06	2.11018e+06	1.20676e+06	2.20046e+06	4.57362e+06	2.0828e+06	5.00064e+06	8.90107e+06	7.78299e+06	5.6721e+06	1.913e+06	5.33687e+06	1.59356e+07	3.92029e+06	2.48814e+06	1.47892e+07	1.90249e+06	2.07605e+06	2.5564e+06	5.87722e+06	6.72891e+06	8.65043e+06	445235	7.57123e+06	4.36854e+06	2.26302e+06	1.66236e+06	7.97679e+06	1.43602e+07	490819	6.49578e+06	816.519	816.519	816.519
0	PS(40:8)-H	PS(40:8)-H	PS	(40:8)	(40:8)				830.498	C46 H73 O10 N1 P1	1.04945e+07	6.14868e+06	4.10637e+06	8.29628e+06	2.53349e+06	6.11705e+06	1.18106e+07	3.18124e+06	6.18034e+06	9.31499e+06	3.83792e+06	6.1184e+06	1.22541e+07	1.0009e+07	7.08965e+06	2.70595e+06	8.31509e+06	1.73648e+07	6.16947e+06	4.93825e+06	1.87531e+07	1.70644e+06	4.28976e+06	3.26325e+06	6.58957e+06	9.02201e+06	1.28392e+07	1.30771e+06	9.28064e+06	6.39601e+06	6.10169e+06	3.37732e+06	1.03906e+07	1.77748e+07	3.19405e+06	1.20545e+07	830.497	830.496	830.496
0	PS(40:8p)-H	PS(40:8p)-H	PS	(40:8p)	(40:8p)				814.503	C46 H73 O9 N1 P1	9.86672e+06	6.6739e+06	4.5784e+06	9.34193e+06	2.1573e+06	6.31672e+06	1.15453e+07	3.6541e+06	7.86589e+06	9.23931e+06	4.649e+06	8.05249e+06	1.32498e+07	1.10395e+07	9.47314e+06	2.72748e+06	1.01668e+07	1.83996e+07	5.70844e+06	6.40923e+06	1.9096e+07	2.19394e+06	4.15151e+06	3.74313e+06	9.14391e+06	7.90118e+06	1.16623e+07	1.05199e+06	1.1612e+07	7.17552e+06	6.24004e+06	4.03069e+06	1.09253e+07	1.65642e+07	3.08276e+06	1.11126e+07	814.501	814.501	814.502
0	PS(18:1/23:0)+H	PS(41:1)+H	PS	(18:1/23:0)	(18:1)	(23:0)			860.638	C47 H91 O10 N1 P1	698673	230419	0	286121	84437.2	105331	0	0	0	0	1183.91	0	1.52714e+06	221183	393138	0	317005	4.10588e+06	487792	0	2.01842e+06	0	0	0	446249	736613	1.60854e+06	0	889068	258273	143670	335255	449395	5.39596e+06	0	718304	860.638	860.638
0	PS(18:1/23:0)-H	PS(41:1)-H	PS	(18:1/23:0)	(18:1)	(23:0)			858.623	C47 H89 O10 N1 P1	909862	416112	0	364672	0	583432	226549	0	0	81112.8	126413	400099	2.1297e+06	1.47994e+06	601435	1439.07	416254	3.17593e+06	127168	377188	2.39005e+06	0	0	159940	1.73073e+06	1.03723e+06	1.7504e+06	0	892502	133368	93343.6	178719	1.0497e+06	4.61772e+06	69958.9	1.141e+06	858.623	858.623
0	PS(18:1/23:1)-H	PS(41:2)-H	PS	(18:1/23:1)	(18:1)	(23:1)			856.607	C47 H87 O10 N1 P1	787294	252672	0	80132.9	0	330429	4002.85	0	0	131043	0	89568.3	1.12734e+06	155622	497211	0	339823	1.39539e+06	160411	0	480042	3061.2	0	0	332811	205154	946501	0	162946	285233	0	109890	600081	3.11007e+06	0	372944	856.607	856.607
0	PS(18:1/24:0)+H	PS(42:1)+H	PS	(18:1/24:0)	(18:1)	(24:0)			874.653	C48 H93 O10 N1 P1	708589	396998	1238.68	330850	0	694904	0	0	0	0	113038	151208	2.05715e+06	1.39903e+06	1.09651e+06	303632	321700	4.16803e+06	552203	4794.32	3.14079e+06	128772	125964	198752	820888	1.28028e+06	2.13806e+06	0	1.06572e+06	152893	182410	250649	1.18693e+06	7.20529e+06	0	1.54339e+06	874.653	874.653	874.653
0	PS(18:1/24:0)-H	PS(42:1)-H	PS	(18:1/24:0)	(18:1)	(24:0)			872.639	C48 H91 O10 N1 P1	1.33961e+06	863629	85090.4	367222	87675.9	1.27482e+06	493711	0	272577	383400	524290	134716	3.25514e+06	1.82577e+06	721129	463172	721583	3.73716e+06	559192	440000	3.38954e+06	85250.4	316511	385402	2.39844e+06	947874	2.3499e+06	126210	1.55925e+06	786750	271136	495368	1.81342e+06	6.89577e+06	85653	1.89669e+06	872.639	872.639	872.639
0	PS(20:4/22:6)-H	PS(42:10)-H	PS	(20:4/22:6)	(20:4)	(22:6)			854.498	C48 H73 O10 N1 P1	326604	0	0	180344	0	0	206895	0	0	204071	0	0	643564	174824	276491	0	187781	351496	77043.3	51355.5	1.57566e+06	0	0	117218	129756	0	496970	0	419793	0	128164	0	349469	1.48309e+06	0	420518	854.498
0	PS(20:4/22:6)+H	PS(42:10)+H	PS	(20:4/22:6)	(20:4)	(22:6)			856.512	C48 H75 O10 N1 P1	708053	0	0	359537	0	283205	158618	0	177042	176136	0	121689	620175	357889	293408	0	295479	1.24414e+06	2192.83	0	1.92581e+06	0	0	0	0	0	846875	0	182473	112197	141611	0	238797	1.9343e+06	0	411370	856.512
0	PS(18:1/24:1)-H	PS(42:2)-H	PS	(18:1/24:1)	(18:1)	(24:1)			870.623	C48 H89 O10 N1 P1	1.11783e+06	684311	0	636337	0	646025	236128	0	94928.7	294527	121954	265911	2.05544e+06	859788	1.26343e+06	178142	865633	4.01005e+06	707854	445769	4.373e+06	345722	0	478670	992172	1.1998e+06	2.23255e+06	0	1.03349e+06	614249	223110	67764.9	1.44505e+06	9.11069e+06	0	1.31359e+06	870.625	870.623
0	PS(18:1/24:1)+H	PS(42:2)+H	PS	(18:1/24:1)	(18:1)	(24:1)			872.638	C48 H91 O10 N1 P1	1.16722e+06	434696	0	379097	0	1.18126e+06	418906	0	0	3695.85	0	131310	3.36888e+06	1.86757e+06	1.47668e+06	677598	900340	4.43521e+06	599356	415804	3.34664e+06	182397	0	339132	925137	1.0522e+06	2.56268e+06	0	1.40548e+06	450786	2218.41	100162	793428	5.78195e+06	0	1.41078e+06	872.638	872.638
0	PS(20:2/22:4)-H	PS(42:6)-H	PS	(20:2/22:4)	(20:2)	(22:4)			862.56	C48 H81 O10 N1 P1	6.09521e+06	2.94734e+06	1.65985e+06	4.45017e+06	939855	2.76149e+06	5.99319e+06	1.14373e+06	2.80989e+06	3.43436e+06	2.1416e+06	3.1002e+06	6.11284e+06	4.65011e+06	4.61045e+06	1.41154e+06	4.72854e+06	1.42758e+07	3.28172e+06	2.52884e+06	1.10149e+07	1.10046e+06	1.29845e+06	1.20981e+06	4.30126e+06	3.42194e+06	6.0323e+06	241497	5.03311e+06	3.74713e+06	2.55627e+06	1.1825e+06	5.11664e+06	1.12618e+07	1.26984e+06	5.66525e+06	862.559	862.559	862.559
0	PS(20:1/22:6)-H	PS(42:7)-H	PS	(20:1/22:6)	(20:1)	(22:6)			860.545	C48 H79 O10 N1 P1	138682	251707	0	142159	0	0	279736	0	0	91408.6	153580	0	606246	0	552358	0	94475.2	461288	154460	0	1.36996e+06	0	98295.1	87367.7	262020	113640	705498	0	117511	0	122808	0	415815	1.61e+06	0	421004	860.545	860.545
0	PS(20:1/22:6)+H	PS(42:7)+H	PS	(20:1/22:6)	(20:1)	(22:6)			862.559	C48 H81 O10 N1 P1	1.07184e+06	113258	0	0	0	167020	2.38116e+06	0	0	0	0	0	2.45898e+06	512421	918970	0	111656	513911	0	0	7.02808e+06	0	54073.5	87262.2	9592.08	0	881655	0	440144	0	0	0	237164	3.55297e+06	0	2.86505e+06	862.559	862.559
0	PS(42:8)-H	PS(42:8)-H	PS	(42:8)	(42:8)				858.529	C48 H77 O10 N1 P1	2.53506e+07	1.64433e+07	1.35667e+07	2.14514e+07	8.49021e+06	1.62851e+07	2.3495e+07	7.81717e+06	1.65045e+07	2.21151e+07	1.27346e+07	1.63802e+07	2.75186e+07	2.02833e+07	2.17458e+07	1.01192e+07	2.13585e+07	2.72011e+07	1.70447e+07	1.4382e+07	3.23565e+07	7.18376e+06	1.3168e+07	1.03756e+07	1.87821e+07	1.60106e+07	31020	4.29051e+06	2.67062e+07	1.75124e+07	1.52822e+07	1.03236e+07	2.10879e+07	3.09534e+07	1.04842e+07	2.53228e+07	858.529	858.527	858.528
0	PS(20:3/22:6)-H	PS(42:9)-H	PS	(20:3/22:6)	(20:3)	(22:6)			856.513	C48 H75 O10 N1 P1	1.21508e+07	6.71439e+06	4.64325e+06	1.0039e+07	2.43861e+06	9.05858e+06	1.07841e+07	1.59746e+06	8.18334e+06	1.14565e+07	5.13826e+06	6.76584e+06	1.41008e+07	8.38715e+06	1.21037e+07	3.79407e+06	8.17864e+06	1.31909e+07	7.4942e+06	4.68211e+06	1.89594e+07	1.75252e+06	5.43076e+06	4.87509e+06	7.74859e+06	8.23545e+06	1.3981e+07	1.95557e+06	1.04845e+07	6.851e+06	6.84369e+06	5.51646e+06	1.1113e+07	1.19475e+07	4.65421e+06	1.05179e+07	856.511	856.512	856.513
0	PS(42:9)+H	PS(42:9)+H	PS	(20:3/22:6)	(20:3)	(22:6)			858.528	C48 H77 O10 N1 P1	2.27835e+07	1.783e+07	8.91697e+06	2.37322e+07	7.28488e+06	1.57801e+07	2.34493e+07	4.55848e+06	1.42427e+07	1.77237e+07	9.31289e+06	1.1331e+07	3.62138e+07	1.72207e+07	2.44655e+07	6.19024e+06	2.19764e+07	1.72016e+07	1.5107e+07	9.04912e+06	3.81713e+07	2.98075e+06	1.28541e+07	9.42252e+06	1.38678e+07	1.72428e+07	2.60234e+07	2.57162e+06	2.24581e+07	1.68149e+07	1.59053e+07	1.67716e+07	1.60014e+07	3.23688e+07	1.19471e+07	2.27075e+07	858.528	858.528	858.528
0	PS(22:4/22:6)+H	PS(44:10)+H	PS	(22:4/22:6)	(22:4)	(22:6)			884.544	C50 H79 O10 N1 P1	9.24953e+06	3.22954e+06	1.67097e+06	8.78468e+06	327485	5.4039e+06	7.70811e+06	335400	2.96693e+06	6.00094e+06	1.29059e+06	3.92626e+06	1.04787e+07	6.33127e+06	5.05528e+06	1.41249e+06	7.62557e+06	2.77695e+07	4.49493e+06	4.84384e+06	2.38142e+07	510390	1.50451e+06	1.71983e+06	4.80497e+06	4.93678e+06	1.50346e+07	155587	8.3068e+06	3.56397e+06	4.55246e+06	2.04579e+06	9.77256e+06	2.89337e+07	1.32238e+06	9.78749e+06	884.543	884.544	884.544
0	PS(22:4/22:6)-H	PS(44:10)-H	PS	(22:4/22:6)	(22:4)	(22:6)			882.529	C50 H77 O10 N1 P1	6.08037e+06	1.91449e+06	625670	3.60518e+06	276322	2.19266e+06	3.32396e+06	0	1.59494e+06	2.62328e+06	603996	2.52184e+06	6.01894e+06	3.7345e+06	2.691e+06	140119	2.60839e+06	1.03078e+07	2.21974e+06	1.57656e+06	1.12466e+07	182138	863454	214304	2.48265e+06	1.69505e+06	7.25799e+06	126807	4.89288e+06	2.03613e+06	1.93584e+06	1.09595e+06	4.92809e+06	1.30338e+07	845306	5.22048e+06	882.53	882.531	882.529
0	PS(22:6/22:6)+H	PS(44:12)+H	PS	(22:6/22:6)	(22:6)	(22:6)			880.512	C50 H75 O10 N1 P1	3.21328e+06	700274	704823	2.23903e+06	417743	1.49136e+06	2.50283e+06	199018	1.48847e+06	2.9387e+06	1.20784e+06	1.368e+06	5.46042e+06	2.77598e+06	2.08535e+06	665383	2.19847e+06	8.09553e+06	2.02624e+06	1.09774e+06	7.73365e+06	1604.91	962061	461460	1.30681e+06	1.41864e+06	3.42541e+06	0	3.40847e+06	1.15873e+06	1.04298e+06	992566	2.5756e+06	8.28233e+06	378213	4.42215e+06	880.512	880.512	880.512
0	PS(22:6/22:6)-H	PS(44:12)-H	PS	(22:6/22:6)	(22:6)	(22:6)			878.498	C50 H73 O10 N1 P1	2.83527e+06	1.07438e+06	589249	1.66113e+06	210646	1.31082e+06	1.84278e+06	68509.3	1.32277e+06	2.07311e+06	657527	1.00129e+06	3.66759e+06	2.42775e+06	2.06566e+06	404397	1.687e+06	5.85426e+06	2.25178e+06	644621	7.10893e+06	96095.4	601427	590400	1.45236e+06	1.03138e+06	3.70506e+06	71591.4	2.58697e+06	865846	759042	316794	2.43748e+06	6.90748e+06	363044	3.7435e+06	878.499	878.499	878.498
0	PS(44:12)+H	PS(44:12)+H	PS	(44:12)	(44:12)				880.512	C50 H75 O10 N1 P1	3.9752e+06	3.70022e+06	907694	4.327e+06	604395	5.65093e+06	3.55243e+06	1.71068e+06	4.1784e+06	2.84531e+06	1.88101e+06	2.4747e+06	3.92896e+06	3.57829e+06	2.81678e+06	2.73246e+06	3.58114e+06	3127.61	2.64043e+06	2.21263e+06	883337	714005	3.16885e+06	1.40449e+06	2.89932e+06	3.74502e+06	3.12431e+06	1.59232e+06	3.05147e+06	2.71775e+06	3.75471e+06	6.69773e+06	3.1384e+06	629064	4.05963e+06	3.95461e+06	880.512	880.512	880.512
0	SM(d16:0/18:1)+HCOO	SM(d34:1)+HCOO	SM	(d16:0/18:1)	(d16:0)	(18:1)			747.566	C40 H80 O8 N2 P1	6.65264e+06	2.90931e+06	1.51837e+06	3.89409e+06	669351	2.12909e+06	4.5807e+06	453333	1.86317e+06	4.06699e+06	1.65054e+06	2.66583e+06	6.33057e+06	4.98683e+06	2.78529e+06	340507	3.94149e+06	1.94837e+07	2.2736e+06	2.23617e+06	1.7203e+07	808596	806988	792987	2.92335e+06	2.5909e+06	6.45214e+06	81269.2	5.30573e+06	2.70869e+06	1.80753e+06	1.34944e+06	4.61442e+06	1.55337e+07	978390	4.46095e+06	747.567	747.568	747.566
0	SM(d34:1)+H	SM(d34:1)+H	SM	(d16:0/18:1)	(d16:0)	(18:1)			703.575	C39 H80 O6 N2 P1	1.39244e+08	7.77015e+07	2.02023e+07	8.20154e+07	1.61789e+07	5.14582e+07	9.8991e+07	1.61415e+07	4.25956e+07	7.71308e+07	3.26794e+07	6.15763e+07	1.40233e+08	1.07857e+08	7.02626e+07	2.26354e+07	1.00416e+08	3.22438e+08	5.51076e+07	5.17142e+07	2.64467e+08	2.3475e+07	2.38654e+07	2.64706e+07	6.28848e+07	7.73941e+07	1.4241e+08	4.42768e+06	1.2207e+08	5.98477e+07	4.11558e+07	2.25371e+07	1.14715e+08	2.63896e+08	1.39184e+07	1.12992e+08	703.575	703.575	703.575
0	SM(d34:1)+CH3COO	SM(d34:1)+CH3COO	SM	(d34:1)	(d34:1)				761.581	C41 H82 O8 N2 P1	1.59651e+06	544084	1693	599423	446785	917657	591196	111604	0	247439	301576	937930	2.31797e+06	2.0759e+06	879395	339131	1.00662e+06	7.22929e+06	662215	232313	4.41868e+06	427235	5131.83	631028	1.25719e+06	2.3331e+06	2.11576e+06	78163	1.34947e+06	785848	301606	0	1.58785e+06	5.09168e+06	0	1.60734e+06	761.579	761.581	761.581
0	SM(d35:1)+H	SM(d35:1)+H	SM	(d35:1)	(d35:1)				717.591	C40 H82 O6 N2 P1	5219.65	1.39869e+06	268732	1.07678e+06	3782.61	627630	1.51972e+06	2623.45	983145	1.57651e+06	266717	902357	1.73448e+06	2.24061e+06	967206	0	1.23234e+06	1.15513e+07	655837	596922	6.10367e+06	280344	6817.19	247068	794251	844011	1.2755e+06	0	1.91949e+06	515485	711174	2467.84	1.68296e+06	5.3918e+06	0	1.80516e+06	717.591	717.591	717.591
0	SM(d36:0)+H	SM(d36:0)+H	SM	(d36:0)	(d36:0)				733.622	C41 H86 O6 N2 P1	8.6784e+06	4.306e+06	1.4438e+06	3.98074e+06	805742	2.96982e+06	6.61954e+06	1.28446e+06	2.19994e+06	5.10988e+06	1.59872e+06	4.12604e+06	1.07154e+07	7.49239e+06	5.13896e+06	1.09347e+06	5.63212e+06	4.90195e+07	3.07129e+06	3.23842e+06	3.56235e+07	387690	1.74868e+06	1.33045e+06	4.17524e+06	3.59397e+06	9.91715e+06	2127.85	7.13481e+06	2.15069e+06	2.47774e+06	1.48376e+06	6.28339e+06	3.13407e+07	660737	7.17549e+06	733.623	733.622	733.622
0	SM(d18:0/18:1)+HCOO	SM(d36:1)+HCOO	SM	(d18:0/18:1)	(d18:0)	(18:1)			775.597	C42 H84 O8 N2 P1	1.98188e+08	1.02097e+08	5.03853e+07	1.30659e+08	4.24724e+07	8.21398e+07	1.83396e+08	3.47258e+07	8.7511e+07	1.42129e+08	6.4549e+07	9.21415e+07	1.96732e+08	1.45114e+08	1.28415e+08	3.52678e+07	1.47882e+08	4.48983e+08	1.06784e+08	8.50187e+07	3.97852e+08	2.52529e+07	5.40756e+07	4.27213e+07	1.06456e+08	9.35069e+07	2.12264e+08	1.21204e+07	1.90712e+08	8.25953e+07	9.31335e+07	5.43716e+07	1.66411e+08	3.5079e+08	4.35493e+07	1.77855e+08	775.598	775.597	775.598
0	SM(d36:1)+H	SM(d36:1)+H	SM	(d18:0/18:1)	(d18:0)	(18:1)			731.606	C41 H84 O6 N2 P1	1.01214e+09	4.44976e+08	1.55618e+08	6.09649e+08	1.17924e+08	3.00787e+08	8.73421e+08	1.14944e+08	3.34276e+08	6.013e+08	2.19843e+08	3.93666e+08	1.20599e+09	7.51034e+08	5.90582e+08	1.16518e+08	6.90272e+08	3.55093e+09	4.09661e+08	3.39295e+08	2.98066e+09	8.27972e+07	1.64042e+08	1.44321e+08	4.65817e+08	4.01999e+08	1.11861e+09	3.03805e+07	8.87454e+08	3.3e+08	3.46234e+08	1.77545e+08	8.71602e+08	2.60148e+09	1.36695e+08	9.05392e+08	731.607	731.606	731.607
0	SM(d36:1)+CH3COO	SM(d36:1)+CH3COO	SM	(d36:1)	(d36:1)				789.613	C43 H86 O8 N2 P1	1.55891e+06	544722	2586.72	693641	6127.32	377947	165023	0	0	357888	1311.5	718794	2.4564e+06	1.77793e+06	310184	108089	873806	7.09969e+06	129233	198122	4.9156e+06	139198	10434.5	352072	1.10165e+06	1.40758e+06	1.69724e+06	0	917979	486066	615565	0	1.34594e+06	4.95988e+06	0	1.41666e+06	789.613	789.613	789.613
0	SM(d18:1/18:1)+HCOO	SM(d36:2)+HCOO	SM	(d18:1/18:1)	(d18:1)	(18:1)			773.581	C42 H82 O8 N2 P1	9.62962e+06	5.04267e+06	3.29437e+06	1.00253e+07	2.02542e+06	7.0174e+06	1.36495e+07	2.97206e+06	4.25366e+06	5.70628e+06	5.18469e+06	6.70015e+06	1.56125e+07	1.34361e+07	8.68355e+06	2.87166e+06	1.08541e+07	4.39398e+07	7.09063e+06	4.86228e+06	3.59124e+07	2.38634e+06	3.08774e+06	3.29154e+06	8.46692e+06	9.26941e+06	1.73794e+07	802051	1.44909e+07	7.36203e+06	6.04544e+06	2.62646e+06	1.24739e+07	3.29653e+07	2.74027e+06	1.29094e+07	773.582	773.583	773.583
0	SM(d36:2)+H	SM(d36:2)+H	SM	(d18:1/18:1)	(d18:1)	(18:1)			729.591	C41 H82 O6 N2 P1	1.45596e+08	5.70339e+07	3.55351e+07	1.25122e+08	1.99753e+07	6.8646e+07	1.8655e+08	2.554e+07	3.70913e+07	7.97105e+07	514585	7.63984e+07	2.06506e+08	1.78955e+08	1.11786e+08	2.59087e+07	706913	7.0536e+08	7.18155e+07	5.83514e+07	6.30447e+06	2.33158e+07	3.14427e+07	2.89459e+07	1.11593e+08	678781	2.22525e+07	3.04811e+06	2.29036e+06	8.03367e+07	6.25896e+07	2.66548e+07	590503	4.83824e+08	2.19351e+07	1.69059e+08	729.591	729.59	729.591
0	SM(d36:2)+CH3COO	SM(d36:2)+CH3COO	SM	(d36:2)	(d36:2)				787.597	C43 H84 O8 N2 P1	3.5366e+06	1.30403e+06	209964	1.49933e+06	422087	1.97818e+06	2.16427e+06	434215	587235	1.40064e+06	866089	3.16638e+06	5.21556e+06	6.16074e+06	2.61302e+06	1.59304e+06	3.91137e+06	1.75842e+07	1.15669e+06	1.24561e+06	1.25003e+07	2.38332e+06	659494	2.08645e+06	4.31056e+06	4.48553e+06	4.3429e+06	165852	2.92353e+06	1.99581e+06	1.09285e+06	934043	3.47947e+06	1.14836e+07	184146	2.49461e+06	787.595	787.597	787.597
0	SM(d18:1/18:3)+H	SM(d36:4)+H	SM	(d18:1/18:3)	(d18:1)	(18:3)			725.559	C41 H78 O6 N2 P1	6.79865e+06	2.71911e+06	358498	3.83269e+06	108543	1.31586e+06	4.39056e+06	272477	1.23185e+06	2.36549e+06	869049	1.72852e+06	5.2973e+06	655261	1.74501e+06	267929	4.53965e+06	8.62578e+06	2.13108e+06	1.17603e+06	1.43012e+07	484894	264655	393374	2.93457e+06	2.32166e+06	3.89552e+06	99892.8	5.17671e+06	1.44754e+06	798727	215251	4.43907e+06	1.60814e+07	0	4.3972e+06	725.557	725.556	725.559
0	SM(d20:0/18:1)+HCOO	SM(d38:1)+HCOO	SM	(d20:0/18:1)	(d20:0)	(18:1)			803.628	C44 H88 O8 N2 P1	1.23509e+07	5.55552e+06	2.97674e+06	7.18806e+06	2.39951e+06	4.7318e+06	8.85209e+06	1.84933e+06	4.90397e+06	7.60838e+06	3.63274e+06	5.07361e+06	1.33918e+07	9.6508e+06	8.78591e+06	1.51796e+06	7.83371e+06	3.06056e+07	5.27074e+06	5.13229e+06	2.68218e+07	1.27361e+06	3.28071e+06	2.67233e+06	6.30076e+06	5.1786e+06	1.26569e+07	270946	1.12653e+07	4.89227e+06	5.66591e+06	3.18413e+06	1.05052e+07	2.30997e+07	1.59793e+06	1.22464e+07	803.629	803.63	803.63
0	SM(d38:1)+H	SM(d38:1)+H	SM	(d20:0/18:1)	(d20:0)	(18:1)			759.637	C43 H88 O6 N2 P1	3.74668e+07	1.66926e+07	7.95041e+06	2.26748e+07	1.8639e+06	1.27394e+07	2.41835e+07	4.92555e+06	1.34956e+07	2.22129e+07	8.84082e+06	1.72815e+07	4.05841e+07	3.07293e+07	2.31409e+07	6.35463e+06	2.24156e+07	1.9106e+08	1.52453e+07	1.46513e+07	1.01861e+08	3.81603e+06	8.52229e+06	7.68927e+06	1.85455e+07	1.61531e+07	3.76376e+07	559014	3.15991e+07	1.35203e+07	1.51015e+07	9.43266e+06	3.25885e+07	1.29159e+08	7.22104e+06	3.43258e+07	759.637	759.637	759.638
0	SM(d38:1)+CH3COO	SM(d38:1)+CH3COO	SM	(d38:1)	(d38:1)				817.644	C45 H90 O8 N2 P1	1.07815e+06	246342	0	348626	78883.9	383662	346616	0	0	136747	0	373948	1.7908e+06	1.19473e+06	413748	435505	781444	6.1035e+06	1702.76	131974	2.92091e+06	320830	976.949	80191.4	854604	1.18503e+06	1.34447e+06	96282.2	604093	2285.74	226876	2085.32	1.18983e+06	4.49472e+06	0	1.20859e+06	817.644	817.644
0	SM(d38:2)+H	SM(d38:2)+H	SM	(d38:2)	(d38:2)				757.622	C43 H86 O6 N2 P1	1.46707e+06	610737	359048	1.90028e+06	0	799507	2.75982e+06	162296	0	693619	338347	848694	2.91036e+06	2.31486e+06	1.85376e+06	1165.43	952742	1.5172e+07	989535	620260	1.16319e+07	0	244287	0	1.53582e+06	812954	3.49173e+06	0	4.0795e+06	1.42535e+06	320052	591065	2.28032e+06	1.09714e+07	137027	2.98231e+06	757.622	757.622	757.622
0	SM(d38:2)+CH3COO	SM(d38:2)+CH3COO	SM	(d38:2)	(d38:2)				815.628	C45 H88 O8 N2 P1	5764.66	1713.09	0	2498.45	0	0	320765	0	0	106985	0	317568	7617.58	252804	3415.33	0	5856.32	3.3148e+06	0	0	2.05478e+06	0	2117.58	0	4528.33	3202.82	2902.07	0	3772.7	0	0	0	6674.71	8438.25	0	3070.86	815.628	815.628
0	SM(d18:2/20:2)+H	SM(d38:4)+H	SM	(d18:2/20:2)	(d18:2)	(20:2)			753.591	C43 H82 O6 N2 P1	5.93752e+07	3.98266e+07	1.3176e+07	4.7847e+07	9.19868e+06	2.56722e+07	6.59635e+07	9.91647e+06	3.28118e+07	4.76192e+07	2.06407e+07	3.477e+07	7.44637e+07	4.82367e+07	4.24207e+07	1.10809e+07	5.17889e+07	7.3051e+07	3.55324e+07	3.21111e+07	8.3535e+07	6.51897e+06	1.44832e+07	1.30183e+07	4.29525e+07	3.41511e+07	6.35737e+07	2.92438e+06	5.89839e+07	2.8792e+07	3.17553e+07	1.56404e+07	6.22436e+07	7.44922e+07	1.24582e+07	5.96081e+07	753.588	753.588	753.588
0	SM(d38:5)+H	SM(d38:5)+H	SM	(d38:5)	(d38:5)				751.575	C43 H80 O6 N2 P1	5.03608e+08	3.37421e+08	3.65678e+08	2.93665e+08	2.938e+08	2.22485e+08	3.5594e+08	2.81217e+08	3.48316e+08	3.77672e+08	3.11658e+08	3.69582e+08	3.29963e+08	3.70712e+08	3.31246e+08	2.90218e+08	3.0358e+08	9.1041e+08	3.77481e+08	2.69725e+08	3.35339e+08	8.38987e+08	2.07594e+08	5.67851e+08	3.81106e+08	3.64784e+08	4.49225e+08	2.6686e+08	5.0269e+08	3.67607e+08	5.20397e+08	2.98975e+08	6.22851e+08	3.69354e+08	3.32176e+08	6.5434e+08	751.575	751.575	751.575
0	SM(d39:4)+H	SM(d39:4)+H	SM	(d39:4)	(d39:4)				767.606	C44 H84 O6 N2 P1	3451.38	0	0	0	0	3584.62	0	0	0	0	0	0	1053.92	749936	0	1425.08	0	4.99474e+06	0	96999.2	792821	0	0	3067.14	1703.31	67793	2192.17	0	0	0	246.008	0	143849	1.58792e+06	0	383222	767.606
0	SM(d22:0/18:1)+HCOO	SM(d40:1)+HCOO	SM	(d22:0/18:1)	(d22:0)	(18:1)			831.66	C46 H92 O8 N2 P1	3.90146e+06	2.57798e+06	906166	1.59699e+06	1.08e+06	1.22739e+06	2.31153e+06	380407	856322	1.63301e+06	891672	2.02717e+06	4.0522e+06	4.3223e+06	1.77098e+06	715917	1.46694e+06	1.22231e+07	1.85182e+06	2.00781e+06	8.44516e+06	1.94403e+06	741810	1.53406e+06	2.46404e+06	3.46322e+06	4.25612e+06	134176	3.52498e+06	1.5964e+06	1.42272e+06	766263	3.26851e+06	9.23331e+06	333925	3.65632e+06	831.66	831.66	831.66
0	SM(d40:1)+H	SM(d40:1)+H	SM	(d22:0/18:1)	(d22:0)	(18:1)			787.669	C45 H92 O6 N2 P1	9.50431e+06	6.49768e+06	2.00315e+06	4.10176e+06	2.5198e+06	4.64085e+06	6.38191e+06	1.38204e+06	1.29247e+06	4.77358e+06	2.37844e+06	5.48201e+06	1.55101e+07	1.18633e+07	6.00681e+06	2.66309e+06	6.8783e+06	6.44109e+07	3810792	3.84306e+06	3.27491e+07	2.74821e+06	2.36426e+06	2.39772e+06	7.38704e+06	7.63847e+06	1.2124e+07	1.25808e+06	9.33808e+06	4.61589e+06	5.01618e+06	2.3549e+06	8.95817e+06	4.61634e+07	1.72275e+06	1.05546e+07	787.669	787.668	787.67
0	SM(d22:1/18:1)+HCOO	SM(d40:2)+HCOO	SM	(d22:1/18:1)	(d22:1)	(18:1)			829.644	C46 H90 O8 N2 P1	2.06244e+06	565261	2357.29	571221	2238.99	263809	824469	279688	302148	896126	252955	225187	2.16525e+06	2.49882e+06	1.0331e+06	1837.51	1.60333e+06	5.52967e+06	675918	140830	3.87335e+06	97498.9	122873	262981	936211	1.07551e+06	1.61861e+06	63311.2	811014	598388	678370	0	291544	4.13619e+06	0	735636	829.645	829.644	829.644
0	SM(d40:2)+H	SM(d40:2)+H	SM	(d22:1/18:1)	(d22:1)	(18:1)			785.653	C45 H90 O6 N2 P1	8.14125e+06	3.33448e+06	219521	1.50598e+06	760122	2.32134e+06	4.05808e+06	548798	1.05973e+06	3.47368e+06	1.68669e+06	2.88392e+06	1.16809e+07	1.05417e+07	4.53095e+06	1.01408e+06	6.32847e+06	3.37647e+07	2.45327e+06	3.44236e+06	2.16903e+07	1.78102e+06	1.54253e+06	2.28542e+06	4.912e+06	5.30334e+06	8.36424e+06	4758.2	6.25738e+06	3.27756e+06	2.77386e+06	860664	5.66775e+06	2.08199e+07	196946	5.99492e+06	785.653	785.653	785.653
0	SM(d41:1)+H	SM(d41:1)+H	SM	(d41:1)	(d41:1)				801.684	C46 H94 O6 N2 P1	6.4919e+06	4.62494e+06	737928	2.53759e+06	1.51944e+06	2.90744e+06	3.65776e+06	265291	728598	2.81885e+06	1.27609e+06	2.37082e+06	8.05932e+06	6.1008e+06	3.18862e+06	1.52092e+06	3.87219e+06	3.03752e+07	1.93999e+06	2.36269e+06	1.64232e+07	1.21536e+06	1.40102e+06	1.86527e+06	4.22535e+06	3.85207e+06	6.32732e+06	541307	5.77704e+06	2.71631e+06	2.33082e+06	510660	5.33029e+06	2.43704e+07	595559	5.84143e+06	801.684	801.685	801.684
0	SM(d41:1)+HCOO	SM(d41:1)+HCOO	SM	(d41:1)	(d41:1)				845.675	C47 H94 O8 N2 P1	2.69914e+06	1.30847e+06	249196	656831	0	1.00064e+06	996446	365445	492884	1.14844e+06	609195	812401	2.44761e+06	2.73639e+06	1.12301e+06	241580	1.70979e+06	5.97703e+06	692116	966888	4.04387e+06	321493	463595	401425	1.88931e+06	1.55844e+06	2.5533e+06	0	1.84454e+06	804183	1.06748e+06	402052	1.87554e+06	7.2955e+06	258251	2.89532e+06	845.675	845.675	845.675
0	SM(d41:1+pO)+H	SM(d41:1+pO)+H	SM	(d41:1+pO)	(d41:1+pO)				817.679	C46 H94 O7 N2 P1	3.78502e+06	1.09696e+06	0	0	158481	1.14054e+06	2.40161e+06	0	263358	264430	202346	469548	2.30027e+06	15501	1.0915e+06	0	2284.29	6.16683e+06	395796	3315.1	7.43807e+06	26097.9	314659	0	1.16051e+06	2.73987e+06	2.98333e+06	0	1.75066e+06	476455	396369	0	2.51337e+06	7.96201e+06	0	1.09263e+06	817.679	817.679
0	SM(d41:1+pO)+H	SM(d41:1+pO)+H	SM	(d41:1+pO)	(d41:1+pO)				817.679	C46 H94 O7 N2 P1	2.55857e+06	1.46357e+06	0	873591	513727	1.30146e+06	620740	254174	99433.4	580099	135087	663759	3.64802e+06	2.09111e+06	1.13967e+06	478659	1.8534e+06	88075.1	725388	188706	1.18591e+07	341621	113226	564922	2.60843e+06	1.85486e+06	2.26023e+06	0	1.43511e+06	971569	675268	298100	1.80054e+06	1.2013e+07	478.93	2.33455e+06	817.679	817.679
0	SM(d41:2)+H	SM(d41:2)+H	SM	(d41:2)	(d41:2)				799.669	C46 H92 O6 N2 P1	2.48334e+06	1.39102e+06	0	926593	98588	610228	1.37902e+06	0	418184	1.58462e+06	431469	789716	3.34671e+06	4.61961e+06	886448	341305	1.89093e+06	1.18988e+07	1.06122e+06	2434.84	5.51382e+06	587951	200265	513842	1.60033e+06	1.44839e+06	2.09517e+06	0	2.01194e+06	650226	834256	2234.05	2.84788e+06	6.25958e+06	0	2.01683e+06	799.669	799.669
0	SM(d42:1)+H	SM(d42:1)+H	SM	(d42:1)	(d42:1)				815.7	C47 H96 O6 N2 P1	1.95919e+06	1.19727e+06	0	686574	128846	1.05751e+06	491700	117356	0	880483	130213	205423	2.95815e+06	2.06159e+06	1.04147e+06	1540.56	1.47923e+06	8.39834e+06	652881	1101.39	4.95597e+06	8824.66	444193	8783.75	1.51026e+06	1.55399e+06	1.77054e+06	0	1.3724e+06	451073	102098	133910	839133	4.48915e+06	0	1.51684e+06	815.7	815.7
0	SM(d24:0/18:1)+HCOO	SM(d42:1)+HCOO	SM	(d24:0/18:1)	(d24:0)	(18:1)			859.691	C48 H96 O8 N2 P1	4.24896e+06	3.5767e+06	413129	2.59469e+06	1.0788e+06	2.1819e+06	2.82158e+06	418135	772319	1.80208e+06	1.38019e+06	2.71409e+06	6.62016e+06	4.61e+06	2.52537e+06	1.73046e+06	2.78842e+06	1.70902e+07	1.51318e+06	1.20167e+06	1.25171e+07	1.33213e+06	1.35155e+06	1.50394e+06	3.02294e+06	4.17952e+06	6.28171e+06	3371.76	4.05499e+06	2.45593e+06	1.65691e+06	1.45387e+06	3.47397e+06	1.23792e+07	215401	5.49731e+06	859.692	859.694	859.691
0	SM(d42:1)+H	SM(d42:1)+H	SM	(d24:0/18:1)	(d24:0)	(18:1)			815.7	C47 H96 O6 N2 P1	1.30152e+07	8.45168e+06	1.02084e+06	5.44264e+06	2.96665e+06	6.14471e+06	6.91675e+06	1.14425e+06	3.1648e+06	4.91977e+06	2.7236e+06	5.20643e+06	1.69357e+07	1.48086e+07	6.65373e+06	3.75891e+06	8.24244e+06	6.12685e+07	3.74091e+06	4.39955e+06	3.79182e+07	3.77608e+06	2.80837e+06	4.85934e+06	1.01173e+07	1.26984e+07	1.38053e+07	1.26937e+06	1.04168e+07	6.85948e+06	5.78477e+06	3.49599e+06	1.18764e+07	5.98461e+07	1.32667e+06	1.55327e+07	815.701	815.7	815.7
0	SM(d42:2)+H	SM(d42:2)+H	SM	(d42:2)	(d42:2)				813.684	C47 H94 O6 N2 P1	8.24413e+07	4.22361e+07	1.24253e+07	3.27121e+07	1.40841e+07	3.06489e+07	4.37731e+07	1.24163e+07	1.79024e+07	3.47246e+07	2.34181e+07	3.99646e+07	1.04293e+08	1.09624e+08	4.16065e+07	2.02451e+07	5.04599e+07	4.59753e+08	2.56658e+07	2.91876e+07	2.44864e+08	2.74506e+07	1.80507e+07	2.31646e+07	4.73784e+07	6.12003e+07	7.64239e+07	8.02377e+06	6.01603e+07	3.50971e+07	2.82021e+07	1.34101e+07	6.50849e+07	2.92629e+08	8.55121e+06	5.75685e+07	813.684	813.684	813.685
0	SM(d42:2)+HCOO	SM(d42:2)+HCOO	SM	(d42:2)	(d42:2)				857.675	C48 H94 O8 N2 P1	2.79952e+07	1.64138e+07	4.27598e+06	1.03554e+07	5.51894e+06	1.22875e+07	1.49094e+07	4.59484e+06	6.18337e+06	1.28241e+07	9.03797e+06	1.75525e+07	3.38948e+07	3.38215e+07	1.54557e+07	6.56707e+06	1.9505e+07	9.49556e+07	1.02806e+07	1.02035e+07	6.06983e+07	1.01459e+07	6.14065e+06	8.35813e+06	1.78971e+07	2.18313e+07	2.56718e+07	3.11008e+06	2.16562e+07	1.19642e+07	8.75479e+06	5.57776e+06	2.24497e+07	6.86426e+07	3.37878e+06	1.97155e+07	857.677	857.677	857.676
0	SM(d22:2/20:1)+HCOO	SM(d42:3)+HCOO	SM	(d22:2/20:1)	(d22:2)	(20:1)			855.66	C48 H92 O8 N2 P1	5220.76	132262	0	4364.77	0	0	111376	0	185982	544752	1878.23	169664	810898	828325	4604.9	0	2333.51	1.63847e+06	54021	0	587803	0	0	0	123080	143518	695561	0	116572	3183.5	0	0	0	2.04276e+06	0	363987	855.66	855.66
0	SM(d42:3)+H	SM(d42:3)+H	SM	(d22:2/20:1)	(d22:2)	(20:1)			811.669	C47 H92 O6 N2 P1	1.15332e+06	1.56191e+06	331576	929469	294081	536517	895812	194306	474275	682867	118936	1.01043e+06	1.52854e+06	2.57673e+06	1.06073e+06	274390	1.48611e+06	5.98637e+06	278080	349933	2.82139e+06	383747	324716	664349	557954	1.57959e+06	2.14025e+06	1710.34	1.66854e+06	773487	550745	472053	1.8848e+06	6.96211e+06	2210.84	2.69285e+06	811.669	811.669	811.669
0	SM(d18:1/24:4)+H	SM(d42:5)+H	SM	(d18:1/24:4)	(d18:1)	(24:4)			807.637	C47 H88 O6 N2 P1	1.60928e+06	281549	0	1.42147e+06	0	124863	1.26489e+06	0	77851.2	258413	0	32967.2	1.34786e+06	222183	1.08078e+06	0	996286	1.5233e+06	677807	0	6.08239e+06	0	0	0	345675	503521	2.5094e+06	0	2.13757e+06	319334	222776	150068	1.1554e+06	3.86982e+06	0	1.53862e+06	807.637
0	SM(d43:2)+H	SM(d43:2)+H	SM	(d43:2)	(d43:2)				827.7	C48 H96 O6 N2 P1	1.52716e+06	894625	0	175677	0	190985	525350	104870	0	227453	0	662720	2.20619e+06	1.62977e+06	158059	234486	818877	6.48767e+06	149059	137937	3.27316e+06	0	0	2118.57	887891	1.00581e+06	940988	0	1.03628e+06	435727	339613	2406.38	838846	4.4906e+06	0	1.45109e+06	827.7	827.7
0	SM(d43:2)+HCOO	SM(d43:2)+HCOO	SM	(d43:2)	(d43:2)				871.691	C49 H96 O8 N2 P1	733571	0	0	224027	0	70373.5	0	0	0	0	0	0	726706	218234	0	648.607	8937	2.2151e+06	2999.76	0	1.2167e+06	0	0	0	274671	131179	372152	0	89929.8	0	0	0	272256	1.1975e+06	0	1796.74	871.691
0	SM(d43:6)+H	SM(d43:6)+H	SM	(d43:6)	(d43:6)				819.637	C48 H88 O6 N2 P1	3.91779e+06	1.78531e+07	1.98706e+07	1.10429e+07	2.21093e+07	2.11116e+07	1.58306e+07	1.93065e+07	1.73665e+07	1.10287e+07	1.83747e+07	1.9158e+06	1.11965e+06	1.17854e+06	1.66195e+07	2.05424e+07	8.17874e+06	902883	1.82719e+07	2.01063e+07	918127	2.14868e+07	2.12463e+07	1.9059e+07	5.83262e+06	9.42946e+06	2.06833e+06	5.80772e+06	3.57129e+06	1.7253e+07	1.75522e+07	1.71875e+07	3.41099e+06	2.75527e+06	2.35117e+07	8.90435e+06	819.637	819.642	819.637
0	SM(d44:4)+H	SM(d44:4)+H	SM	(d44:4)	(d44:4)				837.684	C49 H94 O6 N2 P1	613565	396367	0	137132	0	186449	183426	1061.96	0	168343	108040	4323.86	900999	1.2745e+06	209623	431892	447999	4.05558e+06	211439	0	4.53104e+06	0	0	334940	331607	1.64898e+06	919067	0	735461	203365	1314.19	0	363853	2.80199e+06	0	820092	837.684	837.684
0	SM(d18:1/26:4)+H	SM(d44:5)+H	SM	(d18:1/26:4)	(d18:1)	(26:4)			835.669	C49 H92 O6 N2 P1	6.11666e+06	4.08774e+06	652507	3.05061e+06	1.10782e+06	2.32998e+06	4.07619e+06	1.15299e+06	1.74684e+06	2974316	1.60694e+06	3.67518e+06	8.05905e+06	8.01238e+06	3.95671e+06	1.82218e+06	4.30373e+06	2.29184e+07	2.06212e+06	2.4318e+06	1.48898e+07	2.56293e+06	1.70466e+06	2.17026e+06	3.91893e+06	4.68941e+06	6.26801e+06	270599	4.81428e+06	3.01141e+06	1.76885e+06	896358	4.75054e+06	1.59592e+07	387307	4.36747e+06	835.666	835.667	835.669
0	SM(d18:1/27:0)+H	SM(d45:1)+H	SM	(d18:1/27:0)	(d18:1)	(27:0)			857.747	C50 H102 O6 N2 P1	2.08757e+06	80649.3	0	0	0	1530.06	852805	0	0	150530	0	819091	2.16684e+06	4.53817e+06	5961.42	212142	127423	1.68866e+07	2125.53	0	5.30577e+06	674228	0	431350	7256.39	4261.98	24610.1	0	3812.22	1503.03	0	0	1.04136e+06	5.438e+06	0	8646.76		857.747
0	SM(d45:2)+H	SM(d45:2)+H	SM	(d45:2)	(d45:2)				855.731	C50 H100 O6 N2 P1	1.55265e+07	2.79913e+06	169815	2.22046e+06	599900	2.94546e+06	3.1596e+06	109165	216243	1.50832e+06	364609	4.89613e+06	1.39763e+07	1.81017e+07	2.93213e+06	2.18209e+06	4.94073e+06	5.77005e+07	1.13103e+06	1.66227e+06	3.12593e+07	4.09244e+06	442591	4.22576e+06	5.46456e+06	8.67849e+06	8.27839e+06	251161	4.05277e+06	2.50449e+06	974852	421464	7.03108e+06	3.57719e+07	99918.6	7.99235e+06	855.731	855.731	855.731
0	SM(d18:0+pO/27:4)+H	SM(d45:4+pO)+H	SM	(d18:0+pO/27:4)	(d18:0+pO)	(27:4)			867.695	C50 H96 O7 N2 P1	1.38558e+06	296886	0	540198	0	650092	1.00441e+06	0	147670	415392	0	249558	694668	930388	555428	0	834683	3.37368e+06	363239	0	2.47414e+06	0	0	0	558967	511466	1.05331e+06	2431.23	656153	434487	261877	3642.74	1.1717e+06	3.47092e+06	0	949015	867.695	867.695
0	SM(d45:6)+H	SM(d45:6)+H	SM	(d45:6)	(d45:6)				847.669	C50 H92 O6 N2 P1	3.25112e+07	2.25931e+07	2.19388e+06	2.65479e+07	2.42389e+06	1.50407e+07	2.76628e+07	1.29253e+06	7.87158e+06	2.36696e+07	6.37265e+06	1.98254e+07	3.16961e+07	2.81356e+07	2.52185e+07	3.93877e+06	2.53501e+07	3.11561e+07	1.50095e+07	1.16718e+07	3.06554e+07	2.96113e+06	4.12397e+06	5.51637e+06	2.46221e+07	2.44803e+07	2.81793e+07	126647	2.90465e+07	1.93199e+07	1.7011e+07	4.2838e+06	2.76744e+07	2.88285e+07	1.87679e+06	2.36033e+07	847.669	847.673	847.669
1	SM(d45:6+hO)+H	SM(d45:6+hO)+H	SM	(d45:6+hO)	(d45:6+hO)				863.664	C50 H92 O7 N2 P1	8.06021e+06	2.70954e+06	1.42969e+06	5.16e+06	901157	2.58663e+06	5.57666e+06	609092	2.41413e+06	4.69963e+06	1.37676e+06	3.46716e+06	7.58853e+06	3.32171e+06	4.17771e+06	684694	4.40215e+06	1.35193e+07	2.55153e+06	2.11246e+06	1.4926e+07	541896	1.24819e+06	1.78057e+06	4.27934e+06	3.19235e+06	8.53486e+06	142232	6.84095e+06	2.6218e+06	3.56538e+06	1.68666e+06	6.09756e+06	1.48496e+07	646977	7.79516e+06	863.663	863.664	863.664
0	SM(d18:0+pO/27:6)+H	SM(d45:6+pO)+H	SM	(d18:0+pO/27:6)	(d18:0+pO)	(27:6)			863.664	C50 H92 O7 N2 P1	8.13489e+06	2.70954e+06	1.60622e+06	5.25473e+06	901157	2.58663e+06	5.57666e+06	592305	2.63015e+06	4.69963e+06	1.39865e+06	3.75704e+06	7.7003e+06	5.14068e+06	4.21905e+06	684694	4.82002e+06	1.69553e+07	2.54825e+06	2.09754e+06	1.4926e+07	542078	1.43846e+06	1.78057e+06	4.27934e+06	3.45376e+06	8.64207e+06	2401.46	7.32621e+06	2.6218e+06	3.56538e+06	1.69742e+06	6.35644e+06	1.57734e+07	646977	7.79516e+06	863.664	863.664	863.664
0	SM(d45:7+hO)+H	SM(d45:7+hO)+H	SM	(d45:7+hO)	(d45:7+hO)				861.648	C50 H90 O7 N2 P1	410560	0	0	1242.17	0	1335.04	464156	0	0	742900	0	3794.92	621566	108165	5325.76	0	84549.5	3.25069e+06	0	0	975017	0	0	0	0	10995.8	4146.87	0	372735	0	0	0	3241.63	747773	0	0	861.648
0	SM(d18:1/28:0)+H	SM(d46:1)+H	SM	(d18:1/28:0)	(d18:1)	(28:0)			871.763	C51 H104 O6 N2 P1	1.69974e+06	409406	0	270396	0	459847	192332	0	0	137713	164890	199968	1.82025e+06	1.86383e+06	303524	150686	382986	8.39064e+06	394711	2697.26	5.50628e+06	2928.39	0	470960	990428	1.52179e+06	1.58134e+06	0	1.00718e+06	590220	644324	128435	856590	6.78549e+06	0	718949	871.763	871.763
0	SM(d48:1)+H	SM(d48:1)+H	SM	(d48:1)	(d48:1)				899.794	C53 H108 O6 N2 P1	1.07307e+06	428291	211448	492943	400981	461469	488289	175188	0	317329	248282	662607	1.67967e+06	2.03752e+06	803203	256235	745162	4.67677e+06	344023	357423	4.94602e+06	683164	350226	577857	1.18693e+06	1.2292e+06	2.03699e+06	0	1.03369e+06	843119	928800	421775	1.02946e+06	6.10196e+06	0	1.79612e+06	899.794	899.794	899.794
0	SM(d48:2)+H	SM(d48:2)+H	SM	(d48:2)	(d48:2)				897.778	C53 H106 O6 N2 P1	1.02896e+07	5.03323e+06	687074	3.08537e+06	1.57903e+06	4.42614e+06	4.6261e+06	840841	676798	2.76214e+06	2.04897e+06	4.73465e+06	1.67393e+07	1.53668e+07	5.77521e+06	2.02894e+06	7.04482e+06	3.58702e+07	3.13406e+06	2.45868e+06	3.32543e+07	2.64834e+06	1.54072e+06	2.98265e+06	9.71421e+06	1.16264e+07	1.26815e+07	573338	8.36405e+06	4.91656e+06	3.08656e+06	1.45969e+06	9.31257e+06	3.50966e+07	790655	8.87156e+06	897.778	897.778	897.778
0	SM(d56:4)+H	SM(d56:4)+H	SM	(d56:4)	(d56:4)				1005.87	C61 H118 O6 N2 P1	202008	0	0	0	0	0	0	0	0	0	0	0	0	0	207605	0	0	727799	0	0	206640	0	119236	0	0	0	0	0	170964	0	0	0	0	412739	0	327820	1005.87
0	SQDG(27:4/30:8)+HCOO	SQDG(57:12)+HCOO	SQDG	(27:4/30:8)	(27:4)	(30:8)			1165.72	C67 H105 O14 S1	3.35318e+06	3.49976e+06	3.66651e+06	4.40082e+06	994876	1.03267e+06	2.7628e+06	2.3483e+06	1.7406e+06	3.64878e+06	2.54489e+06	3.21564e+06	2.5721e+06	2.83558e+06	2.625e+06	1.61591e+06	3.99421e+06	3.72617e+06	1.33641e+06	1.95272e+06	4.64004e+06	3.13723e+06	891176	1.48335e+06	2.72372e+06	2.52895e+06	3.43956e+06	1.90129e+06	3.9391e+06	3.23513e+06	2.12491e+06	721746	4.05532e+06	5.02758e+06	1.75488e+06	3.58424e+06	1165.72	1165.72	1165.72
0	ST(d18:0+pO/18:0)+H-H2O	ST(d36:0+pO)+H-H2O	ST	(d18:0+pO/18:0)	(d18:0+pO)	(18:0)			808.56	C42 H82 O11 N1 S1	4.65525e+06	2.06579e+06	683001	2.0895e+06	595550	1.72893e+06	3.0495e+06	530387	1.22688e+06	1.58135e+06	1.5471e+06	2.38111e+06	5.23379e+06	5.3912e+06	2.09288e+06	844407	3.47722e+06	1.27957e+07	1.5818e+06	2.58173e+06	1.19861e+07	864780	1.32801e+06	1.41673e+06	3.00788e+06	4.09138e+06	5.53378e+06	188719	3.85504e+06	2.58129e+06	1.406e+06	239112	3.72583e+06	1.10995e+07	213147	3.10933e+06	808.56	808.561	808.56
0	ST(d18:1/18:0)+H	ST(d36:1)+H	ST	(d18:1/18:0)	(d18:1)	(18:0)			808.56	C42 H82 O11 N1 S1	4.64398e+06	2.31788e+06	709731	2.0895e+06	595550	1.72893e+06	3.0495e+06	530387	1.20184e+06	1.58135e+06	1.5471e+06	2.78854e+06	5.30072e+06	6.73453e+06	2.03593e+06	860374	3.4275e+06	1.27957e+07	1.70601e+06	2.49492e+06	1.14419e+07	954904	1.18175e+06	1.43177e+06	2.66215e+06	4.12e+06	5.61102e+06	188719	3.94442e+06	2.60099e+06	1.38924e+06	239112	3.66929e+06	1.1343e+07	213147	3.08093e+06	808.56	808.56	808.56
0	ST(d18:1/18:0+O)+H	ST(d36:1+O)+H	ST	(d18:1/18:0+O)	(d18:1)	(18:0+O)			824.555	C42 H82 O12 N1 S1	132645	87375.6	0	652.849	0	723.52	0	867.325	0	7015.87	0	13491.9	10930.5	948892	7223.06	0	559.013	6.64078e+06	4470.85	0	13412.4	0	0	7692.61	10813	12825.8	905081	0	15181.4	0	4677.43	0	7652.85	33258.5	0	12053.5	824.555	824.555
0	ST(d18:1/22:0)+H	ST(d40:1)+H	ST	(d18:1/22:0)	(d18:1)	(22:0)			864.623	C46 H90 O11 N1 S1	8.23864e+06	4.70588e+06	496044	3.67299e+06	860680	4.10933e+06	3.17533e+06	276449	1.10611e+06	2.58795e+06	1.8392e+06	2.95562e+06	7.41075e+06	7.80795e+06	3.99672e+06	1.6923e+06	4.47981e+06	2.3062e+07	2.04832e+06	2.62944e+06	1.51791e+07	2.02994e+06	1.77603e+06	2.01318e+06	4.91009e+06	6.29407e+06	7.50862e+06	602908	5.86541e+06	3.43977e+06	2.40265e+06	2.19281e+06	6.48674e+06	2.15721e+07	644122	5.55477e+06	864.623	864.623	864.623
0	ST(d18:1/22:0+O)+H	ST(d40:1+O)+H	ST	(d18:1/22:0+O)	(d18:1)	(22:0+O)			880.618	C46 H90 O12 N1 S1	1.31838e+07	7.05152e+06	1.36214e+06	5.04146e+06	2.58492e+06	5.54432e+06	4.87024e+06	1.76486e+06	2.36356e+06	4.7409e+06	2.9229e+06	4.98525e+06	1.31015e+07	1.42453e+07	6.99034e+06	2.54724e+06	8.57235e+06	4.15878e+07	3.8044e+06	3.7801e+06	2.599e+07	3.69716e+06	2.7595e+06	3.54148e+06	8.91391e+06	9.22262e+06	1.24254e+07	1.39893e+06	9.35691e+06	6.00243e+06	3.97589e+06	2.63089e+06	1.05384e+07	3.45689e+07	1.32517e+06	1.0372e+07	880.618	880.618	880.618
0	ST(d18:1/22:1)+H	ST(d40:2)+H	ST	(d18:1/22:1)	(d18:1)	(22:1)			862.607	C46 H88 O11 N1 S1	961334	835996	40222.4	0	52754.4	98171.8	216868	0	0	273532	59145.5	472254	13975.7	1.76686e+06	201663	179192	7788.72	5.25495e+06	145635	0	1.51549e+06	679484	12097.4	424254	910578	1.49309e+06	17298.4	0	14669.2	432703	87510.3	55565.7	10738.4	23156.2	0	129512	862.607	862.607	862.607
0	ST(d18:1/23:0)+H	ST(d41:1)+H	ST	(d18:1/23:0)	(d18:1)	(23:0)			878.639	C47 H92 O11 N1 S1	3.51948e+06	2.29486e+06	2723.43	921548	116691	837932	1.19677e+06	558879	217522	1.21311e+06	929843	1.19019e+06	2.97722e+06	3.55872e+06	2.02295e+06	485449	1.17823e+06	9.58233e+06	124971	646079	6.6115e+06	576061	98789.1	177434	2.77246e+06	2.66728e+06	3.53726e+06	4200.28	2.87325e+06	1.10349e+06	1.20097e+06	411017	3.01562e+06	9.51123e+06	162923	2.42237e+06	878.639	878.639	878.639
0	ST(d18:1/23:0+O)+H	ST(d41:1+O)+H	ST	(d18:1/23:0+O)	(d18:1)	(23:0+O)			894.633	C47 H92 O12 N1 S1	1.20401e+07	8.75487e+06	0	5.05504e+06	417436	3.32946e+06	5.93483e+06	702764	1.84563e+06	13725.6	469774	4.96137e+06	1.47502e+07	1.09161e+07	4.67517e+06	3180.3	9.65219e+06	3.48926e+07	2.55198e+06	1.36413e+06	2.87366e+07	793401	1.02491e+06	949439	7.50596e+06	9.42107e+06	1.22319e+07	0	1.26209e+07	5.85153e+06	2.85599e+06	1.04917e+06	9.48418e+06	4.03853e+07	0	7.93613e+06	894.633	894.633
0	ST(d18:1/23:1)+H	ST(d41:2)+H	ST	(d18:1/23:1)	(d18:1)	(23:1)			876.623	C47 H90 O11 N1 S1	17461.7	353517	0	7794.05	4085.11	481748	195762	0	120520	0	307762	4594.73	3749.76	1.09042e+06	2961.79	1049.25	5701.62	2.57929e+06	0	153360	1.73365e+06	0	0	0	929138	663065	1.54984e+06	0	7309.36	8123.16	116714	0	4606.17	1.49721e+06	264.736	0	876.623	876.623
0	ST(d18:0+pO/24:0)+H-H2O	ST(d42:0+pO)+H-H2O	ST	(d18:0+pO/24:0)	(d18:0+pO)	(24:0)			892.654	C48 H94 O11 N1 S1	2.03488e+07	1.0631e+07	1.8713e+06	6.90211e+06	3.75586e+06	8.1409e+06	7.01573e+06	1.82728e+06	3.4499e+06	5.52914e+06	3.51165e+06	7.66636e+06	2.0185e+07	2.02875e+07	8.7415e+06	4.04344e+06	1.20793e+07	5.81172e+07	5.45471e+06	5.63733e+06	3.86545e+07	5.96255e+06	4.50179e+06	4.95258e+06	1.24465e+07	2.11531e+07	1.91397e+07	1.96128e+06	1.30179e+07	8.23971e+06	6.97879e+06	3.67376e+06	1.56666e+07	4.88957e+07	2.66808e+06	1.49644e+07	892.654	892.654	892.654
0	ST(d18:0+pO/24:0+O)+H-H2O	ST(d42:0+pO+O)+H-H2O	ST	(d18:0+pO/24:0+O)	(d18:0+pO)	(24:0+O)			908.649	C48 H94 O12 N1 S1	1.68687e+07	7.64494e+06	1.85665e+06	4.16092e+06	3.32746e+06	6.09876e+06	5.54393e+06	1.19264e+06	3.37136e+06	5.118e+06	3.47403e+06	5.14611e+06	1.67575e+07	1.85402e+07	7.51348e+06	3.05883e+06	9.50644e+06	5.31275e+07	5.2285e+06	3.81367e+06	3.54899e+07	3.83245e+06	2.70515e+06	3.65847e+06	9.27496e+06	1.00484e+07	1.51137e+07	2.13906e+06	8.71167e+06	5.27202e+06	5.04493e+06	2.52328e+06	1.19196e+07	4.97857e+07	1.27237e+06	1.06489e+07	908.649	908.651	908.648
0	ST(d18:0/24:1)+H	ST(d42:1)+H	ST	(d18:0/24:1)	(d18:0)	(24:1)			892.654	C48 H94 O11 N1 S1	318219	835313	0	96259.4	48097.8	161350	385801	0	0	0	82553.1	243161	353715	1.48236e+06	92864.2	175733	114933	3.30132e+06	0	128017	494866	224996	0	217346	289898	1.13925e+06	466723	0	306780	127068	82372.5	0	462009	883526	0	1.09645e+06		892.654
0	ST(d18:1/24:0)+H	ST(d42:1)+H	ST	(d18:1/24:0)	(d18:1)	(24:0)			892.654	C48 H94 O11 N1 S1	2.02208e+07	1.13494e+07	2.47454e+06	6.88445e+06	3.79755e+06	8.09508e+06	7.17571e+06	1.86958e+06	3.43976e+06	6.22762e+06	3.87866e+06	7.66636e+06	2.0185e+07	2.03369e+07	8.7415e+06	4.04475e+06	1.20898e+07	5.90729e+07	5.19567e+06	5.65024e+06	3.86268e+07	5.98096e+06	4.96767e+06	5.06217e+06	1.23367e+07	2.11321e+07	1.90271e+07	2.02323e+06	1.31087e+07	8.24136e+06	7.00413e+06	3.7923e+06	1.55348e+07	4.88957e+07	2.67238e+06	1.48165e+07	892.654	892.654	892.654
0	ST(d18:1/24:0+O)+H	ST(d42:1+O)+H	ST	(d18:1/24:0+O)	(d18:1)	(24:0+O)			908.649	C48 H94 O12 N1 S1	1.68552e+07	7.6705e+06	1.87888e+06	4.80743e+06	3.33058e+06	6.09232e+06	5.57673e+06	1.18467e+06	3.31211e+06	5.0884e+06	3.18307e+06	5.14611e+06	1.67329e+07	1.83231e+07	7.49113e+06	3.06488e+06	9.53776e+06	5.37098e+07	5.19175e+06	3.79317e+06	3.54721e+07	3.79327e+06	3.67211e+06	3.70313e+06	9.26874e+06	1.03375e+07	1.52044e+07	2.10519e+06	8.71487e+06	5.31355e+06	5.07821e+06	2.55392e+06	1.11389e+07	4.97581e+07	1.27245e+06	1.06041e+07	908.649	908.649	908.649
0	ST(d18:1/24:1)+H	ST(d42:2)+H	ST	(d18:1/24:1)	(d18:1)	(24:1)			890.639	C48 H92 O11 N1 S1	5.14444e+07	3.06869e+07	7.19518e+06	2.13791e+07	9.44759e+06	2.25212e+07	2.45797e+07	6.60602e+06	1.07272e+07	1.93584e+07	1.36875e+07	2.43992e+07	5.10794e+07	5.9214e+07	2.67214e+07	1.29146e+07	3.49914e+07	1.81407e+08	1.56319e+07	1.61206e+07	1.09794e+08	1.83192e+07	1.16103e+07	1.49369e+07	3.71844e+07	4.69295e+07	5.02157e+07	5.32411e+06	3.95692e+07	2.36654e+07	1.60831e+07	8.87047e+06	4.23163e+07	1.46964e+08	4.41225e+06	3.49757e+07	890.638	890.64	890.639
0	ST(d42:2+O)+H	ST(d42:2+O)+H	ST	(d42:2+O)	(d42:2+O)				906.633	C48 H92 O12 N1 S1	8.863e+06	5.39272e+06	805798	3.47894e+06	1.36478e+06	3.0313e+06	4.59157e+06	695500	2.81887e+06	3.78015e+06	2.07546e+06	3.04678e+06	9.14805e+06	8.89992e+06	5.10681e+06	2.02839e+06	6.29143e+06	3.14061e+07	3.88836e+06	3.16032e+06	1.73424e+07	2.89189e+06	1.61536e+06	2.31937e+06	5.577e+06	7.07444e+06	6.89792e+06	415625	8.64172e+06	3.24742e+06	1.89189e+06	1.42875e+06	5.32096e+06	2.20484e+07	422047	5.01746e+06	906.631	906.634	906.633
0	ST(d18:2/24:1)+H	ST(d42:3)+H	ST	(d18:2/24:1)	(d18:2)	(24:1)			888.623	C48 H90 O11 N1 S1	1.19384e+06	2653.32	0	815293	0	118987	314201	0	0	223562	328959	652029	4.02154e+06	2.00097e+06	510073	0	1.14192e+06	6.26055e+06	403326	479620	5.22777e+06	621585	108051	117444	1.30163e+06	1.20539e+06	1.77367e+06	82139	1.90993e+06	225984	177549	0	1.44019e+06	5.93288e+06	0	1.06028e+06	888.623	888.623
0	ST(d18:1/25:1)+H	ST(d43:2)+H	ST	(d18:1/25:1)	(d18:1)	(25:1)			904.654	C49 H94 O11 N1 S1	209461	340307	0	12966.9	0	0	0	0	0	0	0	204092	515021	1.78606e+06	0	0	325591	7.19493e+06	4630.81	0	670576	0	0	0	336258	280383	868282	0	257427	103619	0	0	609185	3.78215e+06	0	352332	904.654	904.654
0	ST(d44:3+pO)+H-H2O	ST(d44:3+pO)+H-H2O	ST	(d44:3+pO)	(d44:3+pO)				914.639	C50 H92 O11 N1 S1	1.29744e+06	1.07515e+06	0	905302	167019	615513	687944	0	174982	683521	114331	446738	1.96767e+06	2.15519e+06	828582	283169	1.43077e+06	3.15521e+06	352992	188972	3.85903e+06	1717.27	146698	568693	976768	1.45272e+06	1.74114e+06	0	1.18964e+06	559484	613708	353105	1.50332e+06	4.25698e+06	0	1.22436e+06	914.639	914.639
0	ST(d44:4)+H	ST(d44:4)+H	ST	(d44:4)	(d44:4)				914.639	C50 H92 O11 N1 S1	2812.48	1.0883e+06	0	926325	187122	999.456	703785	0	1625.63	288149	2853.21	352388	2.02691e+06	2.26779e+06	3938.39	567864	1.22629e+06	4.88349e+06	8639.42	528462	6393.61	321325	3452.94	633406	2501.65	1.19247e+06	1.80111e+06	0	1.12668e+06	1867.08	10372.4	2552.62	1.56383e+06	3.60279e+06	0	1.2888e+06	914.639	914.639
0	ST(d44:5)+H	ST(d44:5)+H	ST	(d44:5)	(d44:5)				912.623	C50 H90 O11 N1 S1	3.31639e+06	3.03645e+06	449133	2.25821e+06	1.03131e+06	1.86305e+06	2.04536e+06	758531	984558	2.12258e+06	1.66291e+06	2.30259e+06	4.28484e+06	1.84681e+06	2.38812e+06	989034	2.50508e+06	2.87599e+06	1.85906e+06	690141	6.52832e+06	964248	1.08749e+06	1.51766e+06	2.86917e+06	5.23309e+06	3.21787e+06	446970	3.73786e+06	2.44773e+06	1.54962e+06	621784	2.76417e+06	6.84793e+06	339072	3.51745e+06	912.623	912.623	912.623
1	So(d12:0+pO)+H-H2O	So(d12:0+pO)+H-H2O	So	(d12:0+pO)	(d12:0+pO)				216.196	C12 H26 O2 N1	1.03432e+06	594562	301814	1.36766e+06	161876	1.29551e+06	218155	699270	604521	494424	1.89938e+06	1.79598e+06	1.77202e+06	1.2631e+06	230310	1.25291e+06	2.57919e+06	115701	2.80074e+06	923307	1.43096e+06	1.45174e+06	3.40285e+06	723155	3.07139e+06	3.36557e+06	486158	214460	1.23163e+06	529268	1.31065e+06	537503	499619	919376	779307	2.96497e+06	216.196	216.196	216.196
1	So(d12:0+pO)+H-H2O	So(d12:0+pO)+H-H2O	So	(d12:0+pO)	(d12:0+pO)				216.196	C12 H26 O2 N1	1.15039e+06	1.0803e+06	470919	534759	701788	1.60316e+06	839940	535443	847760	515519	237949	230755	1.62946e+06	309261	611045	2.05725e+06	320319	2.97374e+06	2.30614e+06	1.00356e+06	963648	705436	346316	682584	222855	784800	941870	1.22059e+06	418597	884275	349017	2.40917e+06	819343	2.26992e+06	403224	492905	216.196	216.196	216.196
0	So(d12:0+pO)+H-H2O	So(d12:0+pO)+H-H2O	So	(d12:0+pO)	(d12:0+pO)				216.196	C12 H26 O2 N1	1.49711e+06	692279	4.53479e+06	1.11589e+07	899618	1.22749e+07	2.34869e+06	1.4112e+06	545776	1.33801e+06	1.85601e+06	2.02738e+06	660404	6.80294e+06	1.60741e+06	700310	2.24391e+06	805577	3.06461e+06	5.75698e+06	2.1636e+06	767515	533506	556752	753339	371655	2.46117e+06	2.91508e+06	1.4238e+06	139956	1.28416e+06	446614	877211	708202	1.53212e+06	2.0262e+06	216.196	216.196	216.196
0	So(d12:0+pO)+H-H2O	So(d12:0+pO)+H-H2O	So	(d12:0+pO)	(d12:0+pO)				216.196	C12 H26 O2 N1	1.04317e+07	1.12376e+06	8.32102e+06	8.61712e+06	3.91492e+06	3.65035e+06	2.62719e+06	5.26259e+06	404246	6.32565e+06	2.02425e+06	1.80918e+06	9.98493e+06	145650	1.27546e+06	7.03578e+06	1.08973e+07	1.48963e+06	1.78885e+06	4.79022e+06	671965	2.12261e+06	830397	1.10779e+06	578231	1.34773e+06	2.99109e+06	1.15505e+07	2.20952e+06	168224	1.83658e+06	2.1933e+06	2.46241e+06	205851	3.77748e+06	4.92782e+06	216.196	216.196	216.196
1	So(d12:0+pO)+H-H2O	So(d12:0+pO)+H-H2O	So	(d12:0+pO)	(d12:0+pO)				216.196	C12 H26 O2 N1	1.19906e+06	1.134e+06	1.11629e+06	442893	925896	6.53856e+06	1.25655e+06	2.64485e+06	819353	3.47146e+06	320876	1.03864e+06	168627	698048	1.10148e+06	131993	2.83407e+06	1.05137e+06	4.13004e+06	1.82194e+06	1.62305e+06	1.4918e+06	3.04623e+06	1.92476e+06	1.0083e+06	2.47015e+06	1.78221e+06	997890	3.92668e+06	913157	1.72767e+06	1.01618e+06	1.1361e+06	2.55204e+06	475400	1.45173e+06	216.196	216.196	216.196
0	So(d17:0+pO)+H	So(d17:0+pO)+H	So	(d17:0+pO)	(d17:0+pO)				304.285	C17 H38 O3 N1	1.50518e+08	2.03719e+08	5.88787e+07	1.59922e+08	4.48938e+07	6.88393e+07	1.59596e+08	6.48244e+07	1.32794e+08	2.33463e+08	1.11113e+08	1.27715e+08	1.14107e+06	687778	3.81132e+06	364220	1.56778e+06	1.08969e+06	1.82137e+06	259839	2.17549e+06	541420	314679	405279	765396	596376	1.68096e+06	1.10132e+06	919214	602790	644152	882746	1.01257e+06	2.9144e+06	248757	1.10843e+06	304.285	304.285	304.285
0	SoP(d22:1)+NH4	SoP(d22:1)+NH4	SoP	(d22:1)	(d22:1)				453.345	C22 H50 O5 N2 P1	0	221890	0	0	4131.02	0	2.53636e+06	0	1716.1	0	0	0	2.30312e+07	6.13367e+07	1.83598e+07	2.4513e+07	1.76387e+07	5.87499e+07	7.68653e+06	2.28563e+07	3.03831e+07	8.29489e+07	3.20135e+06	1.20841e+07	6.64148e+06	2.10868e+07	4.02182e+07	6.16349e+07	1.92678e+07	4.53245e+07	1.08895e+07	1.02334e+07	1.02541e+07	3.83742e+07	4.99859e+07	2.30239e+07		453.345
0	TG(4:0/8:0/10:3)+NH4	TG(22:3)+NH4	TG	(4:0/8:0/10:3)	(4:0)	(8:0)	(10:3)		454.316	C25 H44 O6 N1	3107.71	153933	236807	318507	2.79337e+06	88659.8	0	156231	4671.18	191498	5828.02	0	129377	0	113937	355596	115506	5062.55	180978	108844	110836	3167.93	65374.7	250138	149221	115936	80597.8	62848.9	246653	370688	6781.09	76460.9	124665	2751.6	88573.1	4817.94	454.316	454.316	454.316
0	TG(6:0/10:2/10:3)+NH4	TG(26:5)+NH4	TG	(6:0/10:2/10:3)	(6:0)	(10:2)	(10:3)		506.348	C29 H48 O6 N1	0	0	0	0	1.83332e+07	0	0	0	0	0	0	0	0	0	0	0	0	0	0	0	0	0	0	0	0	0	0	0	0	0	0	0	0	0	0	0
0	TG(6:0/10:3/10:4)+NH4	TG(26:7)+NH4	TG	(6:0/10:3/10:4)	(6:0)	(10:3)	(10:4)		502.316	C29 H44 O6 N1	9.51104e+06	1.15641e+07	5.02964e+06	6.63644e+06	6.37815e+06	4.25012e+06	6.89461e+06	3.51728e+06	6.08705e+06	1.77564e+07	5.75983e+06	6.2517e+06	6.54253e+06	5.51644e+06	5.56629e+06	2.7087e+06	7.75627e+06	1.67791e+07	3.00577e+06	3.74185e+06	5.89141e+06	5.66831e+06	2.09566e+06	4.7744e+06	8.35448e+06	9.66856e+06	5.54309e+06	6.52077e+06	5.05361e+06	4.02585e+06	4.56499e+06	5.49637e+06	1.25181e+07	6.17914e+06	3.92398e+06	7.44183e+06	502.317	502.316	502.316
0	TG(10:0/10:2/11:4)+NH4	TG(31:6)+NH4	TG	(10:0/10:2/11:4)	(10:0)	(10:2)	(11:4)		574.41	C34 H56 O6 N1	0	0	0	0	1.05274e+07	0	0	0	0	0	0	0	0	0	0	0	0	0	0	1035.26	0	0	0	393.739	71431.2	0	0	0	0	0	0	3281.85	0	0	0	0
0	TG(6:0/13:0/16:1)+NH4	TG(35:1)+NH4	TG	(6:0/13:0/16:1)	(6:0)	(13:0)	(16:1)		640.551	C38 H74 O6 N1	5.19788e+06	5.45925e+06	4.90692e+06	8.23436e+06	2.12957e+06	1.97658e+06	3.90209e+06	3.57194e+06	4.0091e+06	7.5694e+06	4.33321e+06	5.589e+06	5.13078e+06	3.22678e+06	4.72258e+06	244235	8.29688e+06	8.64761e+06	3.06973e+06	5.92991e+06	8.22795e+06	4.09602e+06	2.70732e+06	3.90392e+06	5.01484e+06	6.0973e+06	5.35419e+06	3.35683e+06	6.75255e+06	5.64126e+06	4.8638e+06	2.06458e+06	6.30402e+06	1.24188e+07	4.0351e+06	1.19615e+07	640.551	640.551	640.551
0	TG(16:0/8:0/11:1)+H	TG(35:1)+H	TG	(16:0/8:0/11:1)	(16:0)	(8:0)	(11:1)		623.525	C38 H71 O6	8.64096e+06	5.83267e+06	5.99241e+06	7.54073e+06	3.5014e+06	1.91893e+06	5.97264e+06	4.93594e+06	4.55637e+06	7.59388e+06	5.99901e+06	8.03584e+06	6.46948e+06	7.002e+06	6.80743e+06	4.97998e+06	8.35824e+06	1.31583e+07	4.1654e+06	7.52649e+06	1.03049e+07	6.02992e+06	3.15601e+06	5.34926e+06	6.26915e+06	7.04015e+06	8.22741e+06	3.40778e+06	9.46067e+06	7.94825e+06	7.08591e+06	3.38749e+06	8.88191e+06	1.44175e+07	6.76728e+06	1.31305e+07	623.524	623.524	623.524
0	TG(16:0/8:0/11:1)+NH4	TG(35:1)+NH4	TG	(16:0/8:0/11:1)	(16:0)	(8:0)	(11:1)		640.551	C38 H74 O6 N1	346893	233259	105129	227999	454.941	0	324426	256141	4992.54	423971	159110	455181	1718.7	175263	296429	0	1.05429e+06	169079	245.304	105434	593972	591932	108743	6210.26	347220	165483	2660.69	7083.53	3391.58	9729.2	476523	9999.91	13193	10524	100844	999121	640.551	640.551	640.551
0	TG(4:0/10:3/21:1)+NH4	TG(35:4)+NH4	TG	(4:0/10:3/21:1)	(4:0)	(10:3)	(21:1)		634.504	C38 H68 O6 N1	5.09113e+06	8.46326e+06	5.02765e+06	5.61406e+06	2.06507e+06	1.18622e+07	4.78101e+06	2.9627e+06	3.59978e+06	6.13848e+06	1.05511e+07	5.96971e+06	4.8193e+06	4.00812e+06	5.07302e+06	6.52195e+06	2.02073e+06	8.41651e+06	1.3705e+07	2.95852e+06	5.59111e+06	5.18662e+06	1.75493e+06	3.623e+06	1.15373e+07	4.85062e+06	5.39122e+06	3.80438e+06	1.42262e+06	2.14787e+06	3.57193e+06	4.44216e+06	7.39114e+06	6.36939e+06	6.40913e+06	4.44133e+06	634.504	634.504	634.504
0	TG(36:7p)+NH4	TG(36:7p)+NH4	TG	(36:7p)	(36:7p)				626.478	C39 H64 O5 N1	0	0	0	0	5.42897e+06	0	0	0	0	0	0	0	0	0	0	0	0	0	0	0	0	0	0	0	0	0	0	0	0	0	0	0	0	0	0	0
0	TG(4:0/16:0/17:1)+NH4	TG(37:1)+NH4	TG	(4:0/16:0/17:1)	(4:0)	(16:0)	(17:1)		668.582	C40 H78 O6 N1	2.58234e+07	1.83636e+07	2.22812e+07	3.11014e+07	8.25579e+06	8.90178e+06	2.24641e+07	1.70917e+07	1.28027e+07	2.87575e+07	1.83904e+07	3.81804e+06	2.18686e+07	243489	2.44244e+07	1.23593e+07	3.47228e+07	4.92237e+07	1.55739e+07	1.9265e+07	3.07485e+07	1.98316e+07	9.7674e+06	1.6335e+07	1.62567e+07	2.50763e+07	2.88063e+07	1.45512e+07	2.86564e+07	2.58107e+07	2.1622e+07	1.03232e+07	3.37984e+07	5.07149e+07	1.91824e+07	5.40015e+07	668.582	668.582	668.582
0	TG(37:1)+NH4	TG(37:1)+NH4	TG	(37:1)	(37:1)				668.582	C40 H78 O6 N1	2.0592e+06	1.64272e+06	1.67989e+06	2.50773e+06	765886	895108	1.8241e+06	1.69306e+06	1.20361e+06	3.4827e+06	1.64875e+06	3.81804e+06	2.10563e+06	1.97474e+06	2.45796e+06	1.6956e+06	3.04447e+06	3.33219e+06	1.44683e+06	2.35917e+06	2.59849e+06	2.27733e+06	698476	1.53665e+06	1.61785e+06	2.07136e+06	2.53807e+06	897252	2.44634e+06	3.25549e+06	1.95461e+06	1.19401e+06	2.87527e+06	5.20718e+06	2.09721e+06	5.09647e+06	668.582	668.582	668.582
0	TG(12:0/12:0/14:0)+NH4	TG(38:0)+NH4	TG	(12:0/12:0/14:0)	(12:0)	(12:0)	(14:0)		684.614	C41 H82 O6 N1	233234	551249	272196	1.3744e+06	230796	211633	492220	412419	283313	202128	1.36999e+06	576959	181791	357262	395736	100636	655958	963682	610389	2429.12	349119	247237	347309	295782	322045	368293	792421	412212	514453	569643	347364	515554	238029	119281	562388	943119	684.614	684.614	684.614
0	TG(6:0/12:0/20:4)+H	TG(38:4)+H	TG	(6:0/12:0/20:4)	(6:0)	(12:0)	(20:4)		659.525	C41 H71 O6	0	6437.59	1.54131e+06	4.74154e+06	1076.75	1.75213e+06	1447.34	36530.8	0	2.56507e+06	205938	0	0	0	17320.7	0	0	0	36753	0	0	8276.07	0	13888.9	0	0	0	0	22834	0	0	0	0	0	18930.6	13234.5			659.525
0	TG(4:0/17:1/18:0)+NH4	TG(39:1)+NH4	TG	(4:0/17:1/18:0)	(4:0)	(17:1)	(18:0)		696.614	C42 H82 O6 N1	2.78618e+07	2.19071e+07	2.1198e+07	2.99586e+07	1.1435e+07	8.4568e+06	1.80991e+07	1.75405e+07	1.4778e+07	2.17458e+06	1.96812e+07	2.58346e+06	2.33003e+07	2.26713e+07	2.46602e+07	165824	3.45605e+07	4.82397e+07	1.55634e+07	2.06566e+06	3.13055e+07	176601	1.11938e+07	1.81268e+07	1.98804e+07	2.41119e+07	2.69876e+07	1.66442e+07	3.07262e+07	2.73478e+07	2.38873e+07	1.32841e+07	2.99593e+07	5.52205e+07	1.94592e+07	5.10549e+07	696.614	696.614	696.615
0	TG(4:0/17:1/18:0)+H	TG(39:1)+H	TG	(4:0/17:1/18:0)	(4:0)	(17:1)	(18:0)		679.587	C42 H79 O6	181618	521010	136160	748231	3.20547e+06	1.29832e+06	5.14746e+06	4.23594e+06	3.96663e+06	610303	652518	438847	193743	315369	223467	196302	204637	940461	267417	260158	469610	6.59721e+06	168715	121512	376371	391901	7.72643e+06	293870	1.01201e+07	339558	634030	3.37495e+06	745433	1.79779e+06	653304	1.42068e+07	679.587	679.587	679.587
0	TG(16:0/12:0/12:0)+NH4	TG(40:0)+NH4	TG	(16:0/12:0/12:0)	(16:0)	(12:0)	(12:0)		712.645	C43 H86 O6 N1	154488	365205	222292	1.07067e+06	724336	285706	463275	464391	285783	264516	787195	793068	706494	532662	130332	175331	351878	481162	498491	382123	785663	655385	281250	362925	667540	432240	708986	431281	444176	337676	486302	489491	580227	598014	622420	636963	712.645	712.645	712.645
0	TG(18:3/10:4/12:3)+NH4	TG(40:10)+NH4	TG	(18:3/10:4/12:3)	(18:3)	(10:4)	(12:3)		692.488	C43 H66 O6 N1	529918	1.70785e+06	56550.4	46492.4	444550	473971	212279	0	1.54069e+06	5.88354e+06	477071	1.39142e+06	149040	806276	402823	77790.9	110477	298713	118389	913307	0	0	956599	1.2628e+06	596069	399083	324747	983058	63936.9	0	1.9793e+06	1.0657e+06	0	0	1.31002e+06	1.45316e+06	692.488	692.488	692.488
0	TG(25:1/8:0/8:0)+NH4	TG(41:1)+NH4	TG	(25:1/8:0/8:0)	(25:1)	(8:0)	(8:0)		724.645	C44 H86 O6 N1	2.35669e+06	1.46491e+06	1.60651e+06	1.8717e+06	617524	304205	1.75709e+06	620364	950899	2.79057e+06	1.53054e+06	2283.14	1.53493e+06	13946.8	243192	1.26076e+06	9338.25	4.06355e+06	823757	3635.79	2.13391e+06	2.88318e+06	429206	3248.33	1.72463e+06	1.20265e+06	2.06182e+06	711039	2.54244e+06	1.54843e+06	2.23043e+06	985840	124963	4.29681e+06	1.3845e+06	4.63458e+06	724.645	724.645	724.645
0	TG(16:0/12:0/14:0)+NH4	TG(42:0)+NH4	TG	(16:0/12:0/14:0)	(16:0)	(12:0)	(14:0)		740.676	C45 H90 O6 N1	229207	95449.6	5140.54	1.5134e+06	394033	501791	184360	685411	117231	503202	745898	405551	562099	298778	880319	738892	967490	1.27915e+06	576131	632241	522828	553751	418332	475013	540101	680727	444404	643851	1.04952e+06	689943	773082	413834	222428	545850	670797	1.08997e+06	740.676	740.676	740.676
0	TG(42:4p)+H	TG(42:4p)+H	TG	(42:4p)	(42:4p)				699.592	C45 H79 O5	1.53838e+07	1.19137e+07	3.022e+06	1.30744e+07	1.0767e+06	3.17203e+06	9.50586e+06	926281	2.81594e+06	1.11984e+07	4.25709e+06	1.09694e+07	1.43564e+07	1.19276e+07	8.75164e+06	2.4574e+06	1.44712e+07	4.26499e+06	6.26181e+06	8.67444e+06	7.53588e+06	6.956e+06	2.05902e+06	3.64549e+06	8.23569e+06	1.1025e+07	1.02942e+07	704766	1.3682e+07	1.05207e+07	7.38208e+06	1.7867e+06	1.48951e+07	5.74657e+06	1.98814e+06	1.88278e+07	699.588	699.588	699.592
0	TG(16:0/11:1/16:0)+NH4	TG(43:1)+NH4	TG	(16:0/11:1/16:0)	(16:0)	(11:1)	(16:0)		752.676	C46 H90 O6 N1	4.79435e+06	3.97836e+06	7.33048e+06	4.95279e+06	3.74122e+06	1.37376e+06	5.34652e+06	4.1248e+06	3.66038e+06	6.92989e+06	2.52894e+06	5.23191e+06	4.42233e+06	3.95127e+06	6.08152e+06	4.51583e+06	9.94526e+06	6.75184e+06	4.02769e+06	5.64801e+06	8.93389e+06	3.77468e+06	4.46629e+06	3.99553e+06	3.48538e+06	4.09745e+06	8.98178e+06	4.53559e+06	7.47886e+06	3.63407e+06	5.87242e+06	4.20339e+06	5.78199e+06	9.03349e+06	5.50071e+06	1.01154e+07	752.676	752.676	752.676
0	TG(16:0/14:0/14:0)+NH4	TG(44:0)+NH4	TG	(16:0/14:0/14:0)	(16:0)	(14:0)	(14:0)		768.708	C47 H94 O6 N1	1.23264e+06	868194	1.02646e+06	1.85524e+06	1.31198e+06	553756	1.10061e+06	1.22001e+06	1.22581e+06	1.75379e+06	1.51972e+06	792931	1.18642e+06	936461	1.08926e+06	832932	1.29154e+06	1.21571e+06	685346	666221	853147	884685	206380	849441	875476	818105	1.22175e+06	803525	1.01476e+06	1.3227e+06	2.10895e+06	962857	1.40078e+06	1.24052e+06	1.0756e+06	1.95444e+06	768.708	768.708	768.708
0	TG(44:1)+NH4	TG(44:1)+NH4	TG	(44:1)	(44:1)				766.692	C47 H92 O6 N1	2.67217e+06	2.00061e+06	2.0173e+06	4.79066e+06	1.64609e+06	989588	1.64918e+06	1.73619e+06	1.72432e+06	2.4245e+06	1.98876e+06	2.17002e+06	2.50636e+06	1.75314e+06	2.87432e+06	1387793	3.66941e+06	2.99225e+06	1.38248e+06	437246	4.41081e+06	1.58644e+06	920634	1.0717e+06	2.13258e+06	2.3371e+06	1.8781e+06	1.55241e+06	485539	3.01759e+06	3.32774e+06	1.68215e+06	3.45694e+06	4.83397e+06	2.53816e+06	3.90187e+06	766.692	766.692	766.692
0	TG(44:4p)+H	TG(44:4p)+H	TG	(44:4p)	(44:4p)				727.624	C47 H83 O5	1.04529e+06	3.01362e+06	56364.2	937228	109563	89275	1.11117e+06	371670	354320	2.55581e+06	753516	2.29785e+06	1.59754e+06	4.94144e+06	188722	1.23539e+06	381069	1.53005e+07	121983	2.31533e+06	1.91009e+06	2.19594e+06	360389	1.25269e+06	752007	2.76984e+06	1.1344e+06	245902	1.51378e+06	1.10058e+06	1.37583e+06	145095	1.7452e+06	6.72769e+06	2.42323e+06	1.95334e+06	727.624	727.624	727.624
0	TG(15:0/14:0/16:1)+NH4	TG(45:1)+NH4	TG	(15:0/14:0/16:1)	(15:0)	(14:0)	(16:1)		780.708	C48 H94 O6 N1	715406	218816	3.22503e+06	2.89249e+06	273693	920908	141378	2.2539e+06	446676	3.39585e+06	2.72418e+06	3.5186e+06	205184	182496	197692	1.42744e+06	783220	1.53651e+06	197784	969491	4.20546e+06	149638	203475	107356	134493	2.75746e+06	1.95458e+06	12827.7	3.83489e+06	198671	202463	185241	151640	5.24355e+06	2.83412e+06	67785.2	780.708	780.708	780.708
0	TG(16:0/14:0/16:0)+NH4	TG(46:0)+NH4	TG	(16:0/14:0/16:0)	(16:0)	(14:0)	(16:0)		796.739	C49 H98 O6 N1	3.07333e+06	2.10265e+06	1.69423e+06	4.72505e+06	2.59121e+06	1.83914e+06	2.35706e+06	2.2481e+06	3.1558e+06	2.20829e+06	2.44667e+06	3.38054e+06	3.22825e+06	3.31853e+06	4.54892e+06	2.15438e+06	3.46602e+06	3.20891e+06	3.31638e+06	2.67385e+06	3.14299e+06	2.05959e+06	1.71724e+06	2.45758e+06	2.2432e+06	2.54643e+06	3.35558e+06	2.60807e+06	2.79734e+06	1.97361e+06	2.48768e+06	3.13723e+06	2.50318e+06	4.23352e+06	2.90524e+06	5.15537e+06	796.739	796.739	796.739
0	TG(16:0/14:0/16:1)+NH4	TG(46:1)+NH4	TG	(16:0/14:0/16:1)	(16:0)	(14:0)	(16:1)		794.723	C49 H96 O6 N1	948390	499309	917454	5.64125e+06	593689	342266	856971	718404	1.10703e+06	961348	1.04463e+06	698881	1.56286e+06	412523	719253	684259	839508	3.00374e+06	1.69735e+06	3432.22	2.16732e+06	825366	692501	424580	1.27516e+06	512740	1.63998e+06	659550	964484	995249	1.32154e+06	1.02348e+06	1.41637e+06	1.21614e+06	1.19072e+06	2.07299e+06	794.723	794.723	794.723
0	TG(16:1/14:0/16:1)+NH4	TG(46:2)+NH4	TG	(16:1/14:0/16:1)	(16:1)	(14:0)	(16:1)		792.708	C49 H94 O6 N1	157211	0	3330.26	3.65422e+06	0	3896.27	0	0	1.11143e+06	0	0	3557.7	0	0	226876	195597	135310	5050.15	0	4096.77	302731	0	0	0	113842	0	0	162868	192584	182707	0	8244.19	259345	311905	0	465765	792.708		792.708
0	TG(15:0/16:0/16:0)+NH4	TG(47:0)+NH4	TG	(15:0/16:0/16:0)	(15:0)	(16:0)	(16:0)		810.755	C50 H100 O6 N1	2.85729e+06	1.36302e+06	1.88278e+06	3.46947e+06	1.04853e+06	708132	924466	1.74253e+06	1.59113e+06	1.62824e+06	1.52277e+06	1.1736e+06	1.35818e+06	1.76375e+06	3.68197e+06	1.45372e+06	3.59139e+06	14117.3	1.28166e+06	1.27092e+06	1.03793e+06	1.61367e+06	1.94327e+06	1.25073e+06	1.21199e+06	753995	1.74942e+06	455435	1.42212e+06	1.16084e+06	3.52733e+06	3.43752e+06	842058	1.17818e+06	3.87593e+06	4.32199e+06	810.755	810.755	810.755
0	TG(15:0/16:0/16:1)+NH4	TG(47:1)+NH4	TG	(15:0/16:0/16:1)	(15:0)	(16:0)	(16:1)		808.739	C50 H98 O6 N1	0	0	244282	9.17491e+06	379184	4020.11	166206	404933	2.18156e+06	4603.63	205882	361730	888689	428885	926147	908140	586873	534296	172701	0	507829	143375	0	781579	727039	142235	375859	382432	425463	731541	650553	383488	481193	926758	826373	246302			808.739
0	TG(15:0/16:1/16:1)+NH4	TG(47:2)+NH4	TG	(15:0/16:1/16:1)	(15:0)	(16:1)	(16:1)		806.723	C50 H96 O6 N1	158151	0	0	5.36294e+06	0	133955	125277	153277	3738.17	9563.61	0	146840	0	198169	182078	163065	3607.6	161716	0	0	0	0	0	0	0	123154	0	123184	11681	0	139770	189085	281447	4012.55	0	227872	806.723
0	TG(16:0/16:0/16:0)+NH4	TG(48:0)+NH4	TG	(16:0/16:0/16:0)	(16:0)	(16:0)	(16:0)		824.77	C51 H102 O6 N1	1.07884e+07	1.057e+07	5.92839e+06	1.08451e+07	5.59924e+06	6.89762e+06	1.03098e+07	7.60013e+06	8.05381e+06	1.04589e+07	7.99174e+06	1.1915e+07	1.00775e+07	1.08058e+07	1.04988e+07	6.83587e+06	1.06975e+07	2.2287e+07	8.46292e+06	7.92009e+06	2.09194e+07	7.84999e+06	6.81255e+06	6.52477e+06	8.66922e+06	8.23098e+06	1.27302e+07	6.65682e+06	1.39758e+07	1.04343e+07	8.66456e+06	8.12449e+06	1.08779e+07	2.43981e+07	5.87699e+06	1.84925e+07	824.77	824.77	824.77
0	TG(16:0/14:0/18:1)+NH4	TG(48:1)+NH4	TG	(16:0/14:0/18:1)	(16:0)	(14:0)	(18:1)		822.755	C51 H100 O6 N1	4.39139e+06	4.1312e+06	2.46355e+06	1.62922e+07	2.90117e+06	2.20116e+06	4.33266e+06	3.64394e+06	5.75183e+06	3881990	3.60999e+06	3.62122e+06	3.56181e+06	2.5796e+06	4.4124e+06	2.89447e+06	5.05935e+06	7.08144e+06	2.97546e+06	3.09445e+06	5.48465e+06	3.11136e+06	2.08233e+06	2.11807e+06	3.87368e+06	2.87347e+06	4.27957e+06	2.5068e+06	4.72372e+06	3.91133e+06	4.44797e+06	5.17223e+06	5.85019e+06	7.36131e+06	3.52471e+06	7.97944e+06	822.754	822.754	822.754
0	TG(16:0/16:1/16:1)+NH4	TG(48:2)+NH4	TG	(16:0/16:1/16:1)	(16:0)	(16:1)	(16:1)		820.739	C51 H98 O6 N1	1.30434e+06	1.19374e+06	861380	1.27547e+07	703563	386726	1.40608e+06	1.66305e+06	2.60463e+06	1.26486e+06	886974	1.6398e+06	1.0108e+06	946963	1.05255e+06	266474	1.39514e+06	2.65181e+06	982477	806038	3.9106e+06	443586	564832	733433	808021	989318	1.0028e+06	1.43052e+06	2.23016e+06	1.26688e+06	1.1993e+06	1.01227e+06	610139	3.74528e+06	1.36423e+06	1.23735e+06	820.739	820.739	820.739
0	TG(16:1/16:1/16:1)+NH4	TG(48:3)+NH4	TG	(16:1/16:1/16:1)	(16:1)	(16:1)	(16:1)		818.723	C51 H96 O6 N1	0	0	0	3.83996e+06	0	0	0	0	0	0	0	4195.83	0	0	0	0	0	167248	7806.08	3892.07	143519	6185.38	0	0	0	0	0	0	4748.05	0	151848	5281.24	0	0	0	212239
0	TG(16:0/16:0/17:0)+NH4	TG(49:0)+NH4	TG	(16:0/16:0/17:0)	(16:0)	(16:0)	(17:0)		838.786	C52 H104 O6 N1	1.29477e+06	1.35361e+06	223426	1.4069e+06	539659	200923	1.34121e+06	100784	282290	3.07149e+06	912522	431547	971262	472849	1.04162e+06	515967	875953	1.59801e+06	1.48016e+06	1.44955e+06	746882	639959	786009	292794	429464	183972	1.49181e+06	812431	681548	779584	990812	869495	813819	1.58148e+06	799610	1.95251e+06	838.786	838.786	838.786
0	TG(15:0/16:0/18:1)+NH4	TG(49:1)+NH4	TG	(15:0/16:0/18:1)	(15:0)	(16:0)	(18:1)		836.77	C52 H102 O6 N1	1.42988e+06	1.03217e+06	264648	8.30813e+06	581878	536959	353365	1.1265e+06	1.03952e+06	716148	716657	8584.57	1.15937e+06	1.2668e+06	1.0332e+06	647442	1.77865e+06	1.49006e+06	913925	675058	743956	636442	774220	1.27955e+06	446971	1.59429e+06	991837	284175	694441	834543	1.05558e+06	1.30489e+06	893645	1.20438e+06	1.75668e+06	824624	836.77	836.77	836.77
0	TG(20:1/11:1/18:1)+H	TG(49:3)+H	TG	(20:1/11:1/18:1)	(20:1)	(11:1)	(18:1)		815.712	C52 H95 O6	37253.6	382232	0	125339	92279.4	234011	508798	0	0	303499	10051.4	0	1.92674e+06	1.24615e+06	167677	0	288225	908687	88106.4	0	1.67408e+06	0	0	70732.2	431521	1.11191e+06	382938	0	675252	48033.1	44945.5	0	363025	478706	0	230008		815.712
0	TG(16:1/16:1/17:1)+NH4	TG(49:3)+NH4	TG	(16:1/16:1/17:1)	(16:1)	(16:1)	(17:1)		832.739	C52 H98 O6 N1	0	0	0	1.91444e+06	0	0	0	0	0	0	0	0	0	0	0	0	0	0	0	0	0	0	0	1644.67	0	0	0	0	0	0	0	0	0	0	0	0
0	TG(18:0/16:0/16:0)+NH4	TG(50:0)+NH4	TG	(18:0/16:0/16:0)	(18:0)	(16:0)	(16:0)		852.801	C53 H106 O6 N1	9.40041e+06	6.53159e+06	5.6694e+06	9.80712e+06	4.3455e+06	5.31412e+06	2.5526e+06	5.52091e+06	4.51921e+06	7.60229e+06	5.96213e+06	7.65207e+06	8.86423e+06	7.88839e+06	8.21003e+06	5.66451e+06	9.25646e+06	95654.6	6.08143e+06	6.93156e+06	1.62467e+07	5.57624e+06	4.82053e+06	5.28444e+06	6.28425e+06	5.95973e+06	1.07896e+07	3.56522e+06	9.16462e+06	7.64367e+06	8.5458e+06	6.0468e+06	1.15223e+07	2.23745e+07	4.61469e+06	1.83844e+07	852.802	852.801	852.802
0	TG(16:0/16:0/18:1)+NH4	TG(50:1)+NH4	TG	(16:0/16:0/18:1)	(16:0)	(16:0)	(18:1)		850.786	C53 H104 O6 N1	1.19308e+07	1.11795e+07	6.48427e+06	1.86773e+07	7.42855e+06	8.59306e+06	1.23353e+07	9.00713e+06	1.06532e+07	1.23461e+07	8.50901e+06	1.04245e+07	1.58135e+07	1.21217e+07	1.09462e+07	7.46022e+06	1.17019e+07	3.61467e+07	9.22317e+06	1.00594e+07	3.04027e+07	7.97111e+06	6.63005e+06	6.75238e+06	9.85147e+06	1.17719e+07	1.60032e+07	6.43686e+06	1.59467e+07	1.05472e+07	1.13968e+07	1.03088e+07	1.52388e+07	3.17116e+07	8.06292e+06	2.10076e+07	850.786	850.786	850.786
0	TG(16:0/16:1/18:1)+NH4	TG(50:2)+NH4	TG	(16:0/16:1/18:1)	(16:0)	(16:1)	(18:1)		848.77	C53 H102 O6 N1	7.35723e+06	6.0195e+06	6.23256e+06	1.74119e+07	4.99809e+06	4.1257e+06	5.64563e+06	7.85542e+06	7.43837e+06	6.7339e+06	5.87993e+06	6.42651e+06	9.21137e+06	5.89805e+06	8.03497e+06	5.18428e+06	7.1811e+06	1.27699e+07	5.19608e+06	5.54946e+06	8.66687e+06	7.85109e+06	5.53215e+06	4.92243e+06	7.30324e+06	5.52687e+06	6.89869e+06	4.35242e+06	8.14292e+06	6.32016e+06	6.37244e+06	6.20562e+06	7.47777e+06	1.1365e+07	7.3434e+06	9.14801e+06	848.77	848.77	848.771
0	TG(16:1/16:1/18:1)+NH4	TG(50:3)+NH4	TG	(16:1/16:1/18:1)	(16:1)	(16:1)	(18:1)		846.755	C53 H100 O6 N1	1.80519e+06	1.40724e+06	1.26486e+06	7.48079e+06	906668	800442	1.41878e+06	1.35465e+06	1.08534e+06	1.81759e+06	1.48204e+06	1.00654e+06	1.09022e+06	1.02852e+06	1.47706e+06	1.32955e+06	1.61813e+06	2.76416e+06	1.64621e+06	2.0951e+06	2.87796e+06	382170	1.28329e+06	1.16543e+06	1.36931e+06	1.65975e+06	1.55868e+06	1.04406e+06	2.03253e+06	1.37643e+06	2.28252e+06	1.32396e+06	2.00978e+06	2.31343e+06	601652	1.61368e+06	846.753	846.755	846.755
0	TG(16:0/17:0/18:1)+NH4	TG(51:1)+NH4	TG	(16:0/17:0/18:1)	(16:0)	(17:0)	(18:1)		864.801	C54 H106 O6 N1	215956	563936	0	1.81294e+06	0	5030.95	2957.51	4616.39	986731	0	3152.97	7299.14	2656.89	213341	263604	8852.26	272244	3331.97	376560	0	1.12293e+06	7024.15	0	268641	251333	12274.2	368106	4354.82	726590	15099.7	250214	663892	420210	373844	15956.5	397131	864.801	864.801
0	TG(16:1/17:1/18:1)+NH4	TG(51:3)+NH4	TG	(16:1/17:1/18:1)	(16:1)	(17:1)	(18:1)		860.77	C54 H102 O6 N1	70314.4	0	0	2.4738e+06	0	0	163660	0	0	0	131828	0	0	0	178019	175860	0	517253	1535.4	10136.4	0	0	0	0	437289	183206	0	0	357733	233231	0	0	0	364267	0	0	860.77
0	TG(20:0/16:0/16:0)+NH4	TG(52:0)+NH4	TG	(20:0/16:0/16:0)	(20:0)	(16:0)	(16:0)		880.833	C55 H110 O6 N1	5.11763e+06	4.48284e+06	3.40905e+06	1.5091e+07	5.35229e+06	3.72236e+06	3.49649e+06	3.90335e+06	9.50168e+06	3.49024e+06	6.36397e+06	6.08502e+06	3.9614e+06	4.06415e+06	6.6421e+06	6.29801e+06	2.59249e+06	2.9068e+06	7.70147e+06	3.14783e+06	3.55111e+06	3.26481e+06	4.02054e+06	4.07954e+06	5.20921e+06	3.53609e+06	2.52831e+06	4.14949e+06	3.61565e+06	4.29392e+06	5.05613e+06	4.94152e+06	2.12078e+06	3.67733e+06	2.50861e+06	2.57771e+06	880.833	880.832	880.833
0	TG(18:0/16:0/18:0)+NH4	TG(52:0)+NH4	TG	(18:0/16:0/18:0)	(18:0)	(16:0)	(18:0)		880.833	C55 H110 O6 N1	5.29624e+06	4.07714e+06	3.97173e+06	4.95983e+06	2.27673e+06	2.41329e+06	4.45267e+06	3.92708e+06	3.51296e+06	3.66077e+06	3.53461e+06	5.3979e+06	4.19447e+06	4.87004e+06	4.71608e+06	3.47609e+06	6.67565e+06	9.59387e+06	4.53879e+06	4.00201e+06	8.4602e+06	3.83395e+06	2.54689e+06	2.75448e+06	3.28981e+06	3.84257e+06	5.47361e+06	3.95306e+06	4.73688e+06	3.91633e+06	5.30949e+06	3.4252e+06	5.62419e+06	1.02151e+07	3.68912e+06	8.95618e+06	880.833	880.831	880.833
0	TG(16:0/16:0/20:1)+NH4	TG(52:1)+NH4	TG	(16:0/16:0/20:1)	(16:0)	(16:0)	(20:1)		878.817	C55 H108 O6 N1	2.05657e+06	1.70296e+06	1.53496e+06	4.87233e+06	875039	1.16087e+06	1.13087e+06	715534	2.94984e+06	1.03192e+06	1.42739e+06	1.26903e+06	1.72318e+06	1.66912e+06	2.08789e+06	1.1216e+06	2.51427e+06	2.93202e+06	1.7328e+06	1.11195e+06	1.10693e+06	899420	1.48306e+06	984386	1.09556e+06	1.53444e+06	1.20497e+06	463475	1.0867e+06	1.78807e+06	2.31987e+06	2.01416e+06	794030	2.21292e+06	1.42829e+06	1.69001e+06	878.817	878.817	878.817
0	TG(18:0/16:0/18:1)+NH4	TG(52:1)+NH4	TG	(18:0/16:0/18:1)	(18:0)	(16:0)	(18:1)		878.817	C55 H108 O6 N1	8.1704e+06	5.58386e+06	3.75735e+06	1.13427e+07	3.27109e+06	4.63296e+06	5.53285e+06	3.17108e+06	6.12989e+06	6.53999e+06	3.31505e+06	6.04988e+06	8.50252e+06	5.01367e+06	5.99322e+06	3.46173e+06	5.60422e+06	2.24521e+07	5.47909e+06	5.58443e+06	1.67096e+07	3.27773e+06	2.63903e+06	2.83276e+06	6.19506e+06	5.27415e+06	9.3285e+06	2.40469e+06	8.81957e+06	5.35087e+06	6.53633e+06	5.47843e+06	7.70531e+06	2.07528e+07	3.61441e+06	1.26817e+07	878.817	878.817	878.817
0	TG(16:0/18:1/18:1)+NH4	TG(52:2)+NH4	TG	(16:0/18:1/18:1)	(16:0)	(18:1)	(18:1)		876.801	C55 H106 O6 N1	2.17557e+07	1.88041e+07	1.46024e+07	2.35034e+07	1.65829e+07	1.38035e+07	1.79196e+07	1.52634e+07	1.72813e+07	1.97257e+07	1.59125e+07	2.115e+07	2.14782e+07	2.03722e+07	2.00727e+07	1.46728e+07	2.26938e+07	3.61603e+07	1.66067e+07	1.89674e+07	3.32589e+07	1.58108e+07	1.3412e+07	1.16902e+07	1.57267e+07	1.88081e+07	2.36363e+07	1.55093e+07	2.419e+07	1.87085e+07	2.05452e+07	1.71419e+07	2.15006e+07	3.34721e+07	1.66624e+07	2.66243e+07	876.802	876.801	876.802
0	TG(16:0/18:1/18:2)+NH4	TG(52:3)+NH4	TG	(16:0/18:1/18:2)	(16:0)	(18:1)	(18:2)		874.786	C55 H104 O6 N1	1.21596e+07	1.06274e+07	1.00263e+07	1.71892e+07	9.9331e+06	9.96902e+06	1.04204e+07	9.91133e+06	1.13924e+07	1.21215e+07	1.10007e+07	1.39474e+07	1.25414e+07	1.22636e+07	1.30535e+07	1.09643e+07	1.3048e+07	1.65212e+07	9.93031e+06	1.2481e+07	1.59821e+07	9.86568e+06	9.13608e+06	8.74831e+06	1.05519e+07	1.00442e+07	1.41245e+07	1.04537e+07	1.42075e+07	1.27219e+07	1.42277e+07	1.14421e+07	1.30259e+07	1.83369e+07	1.0186e+07	1.50353e+07	874.786	874.785	874.786
0	TG(16:0/18:2/18:2)+NH4	TG(52:4)+NH4	TG	(16:0/18:2/18:2)	(16:0)	(18:2)	(18:2)		872.77	C55 H102 O6 N1	3.05894e+06	2.22732e+06	2.19111e+06	3.97266e+06	3.47008e+06	2.93648e+06	2.28278e+06	2.506e+06	1.83462e+06	2.09552e+06	2.99116e+06	2.55531e+06	3.23273e+06	3.60273e+06	2.43012e+06	3.10622e+06	3.09638e+06	3.95929e+06	2.53005e+06	2.91595e+06	3.26146e+06	2.87422e+06	1.5015e+06	2.4365e+06	2.81492e+06	2.77311e+06	3.24682e+06	4.44218e+06	3.26562e+06	2.9684e+06	3.64841e+06	2.201e+06	3.39313e+06	4.50266e+06	2.85085e+06	4.21592e+06	872.772	872.77	872.77
0	TG(16:0/16:0/21:0)+NH4	TG(53:0)+NH4	TG	(16:0/16:0/21:0)	(16:0)	(16:0)	(21:0)		894.848	C56 H112 O6 N1	1.85722e+06	4.049e+06	4.11942e+06	6.20921e+06	3.74994e+06	878102	2.39609e+06	1.38889e+06	1.95124e+06	906887	1.06306e+07	1.48666e+06	1.2972e+06	2.8292e+06	1.43253e+07	1.19779e+06	2.52206e+06	1.30235e+07	2.3493e+06	2.85803e+06	1.06953e+06	1.37283e+06	1.14635e+06	1.19395e+07	971798	875946	1.37392e+06	1.86997e+06	5.29387e+06	2.80815e+06	3.14402e+06	5.06599e+06	742646	1.74534e+06	2.90352e+06	2.33747e+06	894.848	894.848	894.848
0	TG(16:0/16:0/22:0)+NH4	TG(54:0)+NH4	TG	(16:0/16:0/22:0)	(16:0)	(16:0)	(22:0)		908.864	C57 H114 O6 N1	8.05852e+06	9.59727e+06	4.68989e+06	1.15735e+07	8.28823e+06	9.03318e+06	1.08166e+07	6.09462e+06	8.21236e+06	7.0458e+06	5.74087e+06	5.09249e+06	8.4872e+06	8.46277e+06	7.12899e+06	6.24658e+06	7.33955e+06	1.21467e+07	6.68019e+06	7.13299e+06	1.31685e+07	7.06356e+06	6.72919e+06	6.50943e+06	6.67395e+06	8.66261e+06	8.07626e+06	5.83247e+06	8.178e+06	6.68017e+06	8.3921e+06	7.61664e+06	8.82226e+06	1.19368e+07	5.84052e+06	9.74665e+06	908.864	908.864	908.865
0	TG(18:0/18:0/18:0)+NH4	TG(54:0)+NH4	TG	(18:0/18:0/18:0)	(18:0)	(18:0)	(18:0)		908.864	C57 H114 O6 N1	7132.01	957059	10782.1	173826	143255	4626.83	145173	253424	857149	866919	709886	992282	338.551	373845	533076	794766	1.93697e+06	2.05117e+06	522033	884590	1.2495e+06	1.12707e+06	2457.42	685654	640163	421959	1.09573e+06	699732	1.47366e+06	1.07218e+06	862001	652092	1.35814e+06	503740	235774	2.67304e+06	908.864	908.864	908.864
0	TG(18:0/18:0/18:1)+NH4	TG(54:1)+NH4	TG	(18:0/18:0/18:1)	(18:0)	(18:0)	(18:1)		906.848	C57 H112 O6 N1	3.16915e+06	3.6764e+06	2.94348e+06	1.36446e+07	2.80913e+06	4.23971e+06	4.8825e+06	5.27636e+06	2.57057e+06	3.97473e+06	4.43913e+06	3.03296e+06	4.78504e+06	3.58792e+06	5.03966e+06	2.3798e+06	253235	2.97696e+06	2.96447e+06	3.16206e+06	5.39985e+06	635411	3.46159e+06	1.66439e+06	3.41291e+06	4.94162e+06	3.72051e+06	1.04972e+06	4.13611e+06	4.51566e+06	4.52003e+06	4.19369e+06	3.86826e+06	2.62259e+06	3.52209e+06	3.53617e+06	906.848	906.848	906.849
0	TG(18:0/18:0/18:1)+NH4	TG(54:1)+NH4	TG	(18:0/18:0/18:1)	(18:0)	(18:0)	(18:1)		906.848	C57 H112 O6 N1	935209	732625	311301	1.75741e+06	182396	252370	745323	544229	1.38056e+06	418115	422291	678557	1.50102e+06	812063	1.0494e+06	624990	908424	2.94279e+06	899644	644769	2.16383e+06	1.00843e+06	420456	348505	570012	1.06141e+06	973299	461264	879316	846754	799825	480614	1.13472e+06	3.61778e+06	658380	1.72338e+06	906.848	906.848	906.848
0	TG(16:0/18:1/20:1)+NH4	TG(54:2)+NH4	TG	(16:0/18:1/20:1)	(16:0)	(18:1)	(20:1)		904.833	C57 H110 O6 N1	3.42325e+06	2.48682e+06	2.9136e+06	4.90457e+06	2.67009e+06	974615	2.57722e+06	1.4143e+06	3.14949e+06	3.83147e+06	2.73489e+06	3.47978e+06	3.99101e+06	3.27012e+06	3.9567e+06	1.78977e+06	2.80977e+06	8.05255e+06	2.90227e+06	2.2449e+06	6.00075e+06	2.89637e+06	2.2832e+06	1.64013e+06	3.34505e+06	3.24912e+06	3.48938e+06	1.99445e+06	3.74185e+06	4.18614e+06	3.40364e+06	2.8116e+06	3.01663e+06	8.55663e+06	3.29346e+06	4.60889e+06	904.833	904.833	904.833
0	TG(18:1/18:1/18:1)+NH4	TG(54:3)+NH4	TG	(18:1/18:1/18:1)	(18:1)	(18:1)	(18:1)		902.817	C57 H108 O6 N1	6.78374e+06	6.97339e+06	4.8188e+06	9.825e+06	5.753e+06	4.92594e+06	6.21698e+06	7.04111e+06	6.89e+06	6.14732e+06	6.93043e+06	6.5407e+06	9.22778e+06	8.13939e+06	7.81322e+06	5.73982e+06	7.82966e+06	1.40163e+07	6.1978e+06	6.94672e+06	1.45623e+07	6.94987e+06	5.60976e+06	3.77589e+06	7.19616e+06	8.35884e+06	1.07944e+07	5.43758e+06	9.47417e+06	9.91385e+06	7.93389e+06	6.079e+06	7.9666e+06	1.25121e+07	6.76057e+06	9.94212e+06	902.817	902.816	902.816
0	TG(18:1/18:1/18:2)+NH4	TG(54:4)+NH4	TG	(18:1/18:1/18:2)	(18:1)	(18:1)	(18:2)		900.801	C57 H106 O6 N1	5.32646e+06	4.27318e+06	3.1483e+06	6.33001e+06	3.44979e+06	3.16682e+06	4.08971e+06	3.88786e+06	3.25761e+06	3.11605e+06	3.66903e+06	5.04214e+06	5.65596e+06	4.71247e+06	5.01912e+06	3.65019e+06	5.27941e+06	8.28236e+06	3.45686e+06	2.79438e+06	1.19931e+07	3.38576e+06	3.8265e+06	2.59924e+06	4.16069e+06	3.64884e+06	5.87111e+06	4.30995e+06	4.94446e+06	5.08925e+06	5.04374e+06	4.62894e+06	7.50581e+06	7.91152e+06	3.76906e+06	5.56513e+06	900.802	900.801	900.801
0	TG(18:0/16:0/22:0)+NH4	TG(56:0)+NH4	TG	(18:0/16:0/22:0)	(18:0)	(16:0)	(22:0)		936.895	C59 H118 O6 N1	4.30905e+06	5.89312e+06	3.78084e+06	5.33147e+06	4.11107e+06	4.74625e+06	6.52355e+06	3.64378e+06	6.83544e+06	5.35147e+06	3.93788e+06	5.32245e+06	6.8613e+06	5.53561e+06	5.90245e+06	3.32121e+06	6.82185e+06	1.19967e+07	4.12829e+06	4.31627e+06	1.07822e+07	3.88109e+06	3.60213e+06	5.59654e+06	4.46011e+06	5.82221e+06	6.38539e+06	3.62203e+06	6.04177e+06	5.11678e+06	5.52673e+06	5.0054e+06	6.29563e+06	9.81743e+06	3.96302e+06	7.81676e+06	936.895	936.896	936.896
0	TG(18:0/16:0/22:1)+NH4	TG(56:1)+NH4	TG	(18:0/16:0/22:1)	(18:0)	(16:0)	(22:1)		934.88	C59 H116 O6 N1	1.03965e+07	7.84179e+06	5.33987e+06	1.12504e+07	5.51793e+06	7.53925e+06	9.39193e+06	4.75396e+06	8.46942e+06	6.15012e+06	6.97219e+06	7.4421e+06	9.97787e+06	8.2594e+06	7.14226e+06	4.77024e+06	6.86236e+06	1.59693e+07	7.40094e+06	6.25501e+06	1.70276e+07	5.35934e+06	7.63209e+06	6.90594e+06	7.49438e+06	7.84458e+06	1.03642e+07	5.55014e+06	1.01026e+07	7.82467e+06	6.89438e+06	7.54167e+06	1.06609e+07	1.51706e+07	4.78368e+06	1.0176e+07	934.88	934.88	934.88
0	TG(18:0/18:0/20:4)+NH4	TG(56:4)+NH4	TG	(18:0/18:0/20:4)	(18:0)	(18:0)	(20:4)		928.833	C59 H110 O6 N1	1.02443e+06	4.97883e+06	202716	877157	523851	279849	297222	202849	526882	1.18205e+06	850698	243266	552949	217316	526288	261302	727951	4.7408e+06	346969	374569	2.35844e+06	2.50381e+06	791094	183805	542619	678433	710733	360104	1.24409e+06	395903	390175	271480	778610	2.57693e+06	1.02709e+06	1.30413e+06	928.833	928.833	928.833
0	TG(16:0/18:1/22:6)+NH4	TG(56:7)+NH4	TG	(16:0/18:1/22:6)	(16:0)	(18:1)	(22:6)		922.786	C59 H104 O6 N1	3.37799e+06	2.22948e+06	1.12133e+06	3.59813e+06	1.21034e+06	1.43291e+06	2.82647e+06	625975	1.42219e+06	3.13216e+06	1.4514e+06	2.94006e+06	5.38288e+06	3.18729e+06	2.67944e+06	0	3.59362e+06	1.55749e+07	2.03237e+06	2.00694e+06	1.26393e+07	966963	1.25387e+06	685207	2.00709e+06	2.76185e+06	5.00176e+06	334365	3.98688e+06	2.22299e+06	2.24922e+06	2.07157e+06	4.135e+06	1.57869e+07	958230	7.05929e+06	922.785	922.786	922.786
0	TG(16:0/20:4/20:4)+NH4	TG(56:8)+NH4	TG	(16:0/20:4/20:4)	(16:0)	(20:4)	(20:4)		920.77	C59 H102 O6 N1	539183	0	149701	0	0	153225	184191	148475	0	210325	227755	171263	566751	346312	262399	0	212978	1.95314e+06	193636	315452	1.14744e+06	0	145831	0	0	0	659173	0	300949	137302	262866	0	417284	1.71182e+06	0	753210	920.77		920.77
0	TG(18:0/16:0/23:0)+NH4	TG(57:0)+NH4	TG	(18:0/16:0/23:0)	(18:0)	(16:0)	(23:0)		950.911	C60 H120 O6 N1	2.38604e+06	2.81955e+06	3.50895e+06	3.20606e+06	7387.54	2.53601e+06	3.51034e+06	1.77372e+06	2.82974e+06	3.05562e+06	2.14089e+06	3.35877e+06	3.75011e+06	3.06463e+06	2.72547e+06	1.97149e+06	2.7688e+06	5.21643e+06	409711	2.97574e+06	3.39294e+06	2.11572e+06	3.05244e+06	2.89235e+06	2.45223e+06	2.78451e+06	3.43371e+06	2.46926e+06	3.37095e+06	2.44484e+06	3.59866e+06	1.87793e+06	4.28266e+06	5.17268e+06	2.78441e+06	5.36093e+06	950.911	950.911	950.911
0	TG(18:0/18:0/22:0)+NH4	TG(58:0)+NH4	TG	(18:0/18:0/22:0)	(18:0)	(18:0)	(22:0)		964.927	C61 H122 O6 N1	3.81863e+06	3.00436e+06	3.21566e+06	4.61301e+06	2.48982e+06	2.17639e+06	2.1911e+06	2.40888e+06	4.45955e+06	2.31251e+06	2.64274e+06	3.18716e+06	2.50032e+06	3.78775e+06	4.34304e+06	2.3716e+06	4.31776e+06	5.20696e+06	3.22871e+06	2.91268e+06	5.76452e+06	2.40104e+06	1.96248e+06	3.14952e+06	2.4283e+06	2.35353e+06	2.71926e+06	2.17373e+06	3.55725e+06	3.06431e+06	3.15926e+06	2.17598e+06	3.71223e+06	4.09372e+06	2.62905e+06	4.83124e+06	964.926	964.926	964.927
0	TG(58:1)+NH4	TG(58:1)+NH4	TG	(58:1)	(58:1)				962.911	C61 H120 O6 N1	4.71456e+06	2.84897e+06	2.04098e+06	4.23517e+06	2.23066e+06	3.47659e+06	3.93442e+06	1.36832e+06	3.91903e+06	3.88524e+06	2.44964e+06	3.57352e+06	5.27567e+06	4.72254e+06	3.73597e+06	1.96032e+06	3.56894e+06	9.28764e+06	3.94664e+06	3.21744e+06	9.4437e+06	1.86005e+06	2.20747e+06	2.21321e+06	2.91552e+06	3.30831e+06	4.91853e+06	2.21691e+06	3.63178e+06	2.90558e+06	3.89834e+06	3.14119e+06	4.48463e+06	9.03014e+06	2.78994e+06	5.76876e+06	962.911	962.911	962.911
0	TG(16:0/20:4/22:6)+NH4	TG(58:10)+NH4	TG	(16:0/20:4/22:6)	(16:0)	(20:4)	(22:6)		944.77	C61 H102 O6 N1	182552	0	0	0	0	0	479682	0	0	593640	0	0	701607	156658	0	0	0	2.2319e+06	180389	0	1.39904e+06	0	0	0	279895	128527	787413	0	476144	0	298098	137908	0	1.81918e+06	0	860416	944.77
0	TG(18:0/20:4/20:4)+NH4	TG(58:8)+NH4	TG	(18:0/20:4/20:4)	(18:0)	(20:4)	(20:4)		948.801	C61 H106 O6 N1	180226	0	0	0	0	4370.14	3787.52	152554	0	2679.07	0	265899	665688	0	0	0	434381	2.95981e+06	0	2982.05	3.02161e+06	0	0	0	167854	0	487354	0	165642	0	3987.01	0	574666	2.31204e+06	190706	802481	948.801
0	TG(18:0/20:4/22:6)+NH4	TG(60:10)+NH4	TG	(18:0/20:4/22:6)	(18:0)	(20:4)	(22:6)		972.801	C63 H106 O6 N1	529909	571078	327953	0	0	182085	0	0	0	0	0	221165	1.71803e+06	354269	237880	0	341780	3.36297e+06	299278	0	2.42945e+06	0	0	0	190692	166271	844200	0	916369	0	415117	270177	1.04045e+06	2.53431e+06	0	1.42877e+06	972.801	972.801	972.801
0	TG(16:0/22:6/22:6)+NH4	TG(60:12)+NH4	TG	(16:0/22:6/22:6)	(16:0)	(22:6)	(22:6)		968.77	C63 H102 O6 N1	455288	542211	0	226969	0	232165	561123	0	136446	664920	132268	383762	811236	343000	422967	0	506865	2.9111e+06	0	0	2.39101e+06	0	116512	0	133822	410097	550545	0	900989	0	286295	178745	732744	2.70068e+06	0	1.60497e+06	968.77	968.77
0	WE(2:0/16:3)+NH4	WE(18:3)+NH4	WE	(2:0/16:3)	(2:0)	(16:3)			296.258	H34 C18 O2 N1	7.48973e+07	6.21765e+07	7.01371e+07	6.04989e+07	2.21351e+07	4.59343e+07	1.48622e+08	5.67438e+07	5.17003e+07	6.01661e+07	4.93188e+07	1.03397e+08	101066	1.19007e+06	582441	93787.9	1.36471e+06	1.31906e+06	367857	1.05626e+06	850515	1.03569e+06	161296	193153	815231	835496	619137	464738	737413	621353	135043	263046	646875	859556	975898	2.10638e+06	296.258	296.258	296.258
0	WE(3:0/16:4)+H	WE(19:4)+H	WE	(3:0/16:4)	(3:0)	(16:4)			291.232	H31 C19 O2	6.56253e+06	3.87216e+06	4.33309e+06	5.55247e+06	1.66431e+06	2.06379e+06	3.62627e+06	5.30549e+06	2.54735e+06	3.4548e+06	7.8933e+06	3.03465e+06	4.14737e+06	5.75437e+06	3.02856e+06	4.83376e+06	7.62792e+06	8.64335e+06	3.68286e+06	3.77772e+06	3.63249e+06	2.66382e+06	1.01957e+06	3.54501e+06	4.85673e+06	6.01233e+06	6.32569e+06	4.84249e+06	3.82499e+06	1.85451e+06	4.13629e+06	1.89624e+06	4.36555e+06	8.13738e+06	2.78713e+06	7.87929e+06	291.232	291.232	291.232
0	WE(3:0/17:4)+NH4	WE(20:4)+NH4	WE	(3:0/17:4)	(3:0)	(17:4)			322.274	H36 C20 O2 N1	3.75515e+07	3.2077e+07	2.31901e+07	3.02727e+07	3.57664e+07	8.2981e+06	2.52166e+07	1.94684e+07	2.83313e+07	3.65302e+07	2.40769e+07	2.46971e+07	1.3201e+07	1.99147e+07	1.94632e+07	1.26507e+07	2.84661e+07	3.63262e+07	1.96543e+07	2.78098e+07	2.67679e+07	1.4989e+07	9.12926e+06	1.73202e+07	2.98397e+07	2.49844e+07	2.04746e+07	1.27604e+07	2.94274e+07	2.11068e+07	2.54438e+07	1.98145e+07	2.27187e+07	3.14067e+07	1.93264e+07	3.25584e+07	322.274	322.274	322.274
0	dMePE(16:0/16:0)-H	dMePE(32:0)-H	dMePE	(16:0/16:0)	(16:0)	(16:0)			718.539	C39 H77 O8 N1 P1	912085	148821	204628	466300	2220.69	438742	1.55178e+06	96199.1	787473	334155	406819	149595	986198	1.06576e+06	501178	176483	1.62871e+06	4.64477e+06	656402	58462.8	2.4529e+06	101905	520545	319253	1.13636e+06	578005	944352	4169.89	364270	254203	314302	230673	825591	1.35602e+06	255947	874719	718.539	718.539	718.539
0	dMePE(16:0/16:1)-H	dMePE(32:1)-H	dMePE	(16:0/16:1)	(16:0)	(16:1)			716.524	C39 H75 O8 N1 P1	4.77738e+07	2.83134e+07	1.13846e+07	3.24398e+07	9.40373e+06	2.34497e+07	4.07543e+07	9.44553e+06	1.98511e+07	3.74719e+07	1.49196e+07	3.01461e+07	6.12221e+07	5.55083e+07	2.87603e+07	1.1651e+07	3.74526e+07	1.28453e+08	2.17602e+07	1.88522e+07	1.05417e+08	1.28116e+07	1.26597e+07	1.24387e+07	3.4312e+07	3.23444e+07	5.27749e+07	5.13521e+06	4.8169e+07	2.58643e+07	1.93944e+07	1.30282e+07	4.57103e+07	1.14349e+08	8.03528e+06	4.34783e+07	716.524	716.524	716.524
0	dMePE(16:0p/22:4)-H	dMePE(38:4p)-H	dMePE	(16:0p/22:4)	(16:0p)	(22:4)			778.576	C45 H81 O7 N1 P1	1.46829e+06	1.74341e+06	541379	980560	304069	716235	806000	286022	804153	1.54258e+06	1.10265e+06	710568	1.10696e+06	2.50571e+06	731732	597400	216305	7.08718e+06	421165	2.80422e+06	3.55261e+06	474596	111645	296422	547269	1.15219e+06	2.46732e+06	83637.4	2.88441e+06	641918	778376	399951	1.4321e+06	3.52332e+06	126001	1.84809e+06	778.576	778.576	778.576
0	dMePE(20:4/20:4)-H	dMePE(40:8)-H	dMePE	(20:4/20:4)	(20:4)	(20:4)			814.539	C47 H77 O8 N1 P1	0	0	0	105448	0	0	66599.2	0	0	0	0	0	0	0	75938.7	0	0	802366	34476.9	0	607449	0	0	0	0	0	183393	0	0	0	46514	0	129594	180199	0	0
0	dMePE(32:1/18:1)-H	dMePE(50:2)-H	dMePE	(32:1/18:1)	(32:1)	(18:1)			966.79	C57 H109 O8 N1 P1	142035	0	93506.5	0	89910.4	122754	0	0	0	91437.2	0	149234	284962	730721	393259	117276	125232	1.58021e+06	0	0	1.46005e+06	91546.2	109578	0	253007	310624	396480	0	97060.2	196676	0	0	248439	1.54701e+06	0	263666	966.79		966.79
0	phSM(d36:2)+CH3COO	phSM(d36:2)+CH3COO	phSM	(d36:2)	(d36:2)				803.592	C43 H84 O9 N2 P1	2.87383e+06	1.63151e+06	89891.7	1.61284e+06	547745	1.52761e+06	1.86703e+06	235700	486834	1.30209e+06	704032	2.16986e+06	4.33464e+06	3.45367e+06	1.99624e+06	809991	3.17054e+06	9.63963e+06	590501	855307	8.72616e+06	8845.15	414299	1.53244e+06	2.64633e+06	3.4028e+06	3.1707e+06	0	2.56598e+06	1.01432e+06	1.47398e+06	561009	3.08462e+06	1.02743e+07	238918	3.50644e+06	803.589	803.589	803.589
0	phSM(d37:4+pO)+CH3COO	phSM(d37:4+pO)+CH3COO	phSM	(d37:4+pO)	(d37:4+pO)				829.571	C44 H82 O10 N2 P1	844099	314087	66262.1	370665	95259.2	174416	606736	72292.2	157630	453421	61749.4	198325	1.0758e+06	365285	222468	1350.07	517594	2.49005e+06	0	242529	2.09356e+06	71713.6	74922.2	997.463	333905	497367	1.13606e+06	0	952409	330342	226272	133977	597697	1.57317e+06	0	330312	829.571	829.571	829.571
0	phSM(d39:7+hO)+HCOO	phSM(d39:7+hO)+HCOO	phSM	(d39:7+hO)	(d39:7+hO)				837.54	C45 H78 O10 N2 P1	1.09653e+07	5.36951e+06	2.20147e+06	9.65357e+06	1.38364e+06	6.99304e+06	1.01503e+07	1.30324e+06	5.35213e+06	9.41501e+06	3.75957e+06	5.1903e+06	1.87032e+07	8.10253e+06	1.05847e+07	2.84568e+06	9.42967e+06	2.03561e+07	7.24956e+06	3.92447e+06	3.20621e+07	1.38259e+06	4.01507e+06	2.19805e+06	7.62904e+06	5.09602e+06	1.33079e+07	933088	1.11779e+07	6.43686e+06	6.26813e+06	3.79289e+06	1.02159e+07	3.83193e+07	2.73204e+06	1.21825e+07	837.539	837.54	837.54
[truncated: 105 more columns]
